# Supplementary material for: PKD1-tau disulfide linkage promotes tau phosphorylation and tau accumulation in a tauopathy mouse model
Source: Research Square preprint supplement (doi:10.21203/rs.3.rs-7655539/v1), 2025-10-13
Supplement: Supplementary file 1 [file 087a152632acf2ec3f007592.xlsx]

## Sheet: Table S5
GroupID	Category	Term	Description	LogP	Log(q-value)	Genes	Symbols	InTerm_InList
1_Summary	KEGG Pathway	mmu04932	Non-alcoholic fatty liver disease - Mus musculus (house mouse)	-2.10987	-1.35092	11652,12122,12866,16367,17709,17991,17992,18033,18707,19697,20463,22272,26416,26420,66416,66694,67130,67264,72674,72900,102631912,12043,12488,12628,13618,15139,16779,18129,19126,70350,71602,93840,11769,11777,11778,11816,12512,17101,17828,19326,226422,232946,14129,14130,15894,16017,13841,19876,24088,14763,16409,16467,20617,26570,109731,14609,20525,20529,30805,69981,239273,12288,12290,12296,28240,6…	Akt2,Bid,Cox7a2,Irs1,COX2,Ndufa2,Ndufa4,Nfkb1,Pik3cd,Rela,Cox7a2l,Uqcrq,Mapk14,Mapk9,Ndufa7,Uqcrfs1,Ndufa6,Ndufb8,Adipor1,Ndufv2,Ndufb1,Bcl2,Cd2ap,Cfh,Ednrb,Hc,Lamb2,Notch2,Prom1,Basp1,Myo1e,Vangl2,Ap1s1,Ap3s1,Ap3s2,Apoe,Cd63,Lyst,Bloc1s5,Rab11b,Rab29,Bloc1s3,Fcgr1,Fcgr2b,Icam1,Ighg1,Epha7,Robo1,Tlr2,Gpr37,Itgam,Atcay,Snca,Slc7a11,Maob,Gja1,Slc2a1,Slc31a1,Slc22a4,Tmem30a,Abcc4,Cacna1c,Cacna1e,Cac…	482/-
1_Member	KEGG Pathway	mmu04932	Non-alcoholic fatty liver disease - Mus musculus (house mouse)	-2.10987	-1.35092	11652,12122,12866,16367,17709,17991,17992,18033,18707,19697,20463,22272,26416,26420,66416,66694,67130,67264,72674,72900,102631912	Akt2,Bid,Cox7a2,Irs1,COX2,Ndufa2,Ndufa4,Nfkb1,Pik3cd,Rela,Cox7a2l,Uqcrq,Mapk14,Mapk9,Ndufa7,Uqcrfs1,Ndufa6,Ndufb8,Adipor1,Ndufv2,Ndufb1	21/157
1_Member	GO Biological Processes	GO:0032835	glomerulus development	-2.1089	-1.0377	12043,12488,12628,13618,15139,16779,18129,19126,70350,71602,93840	Bcl2,Cd2ap,Cfh,Ednrb,Hc,Lamb2,Notch2,Prom1,Basp1,Myo1e,Vangl2	11/56
1_Member	GO Biological Processes	GO:0033059	cellular pigmentation	-2.1089	-1.0377	11769,11777,11778,11816,12043,12512,17101,17828,19326,226422,232946	Ap1s1,Ap3s1,Ap3s2,Apoe,Bcl2,Cd63,Lyst,Bloc1s5,Rab11b,Rab29,Bloc1s3	11/56
1_Member	GO Biological Processes	GO:0002438	acute inflammatory response to antigenic stimulus	-2.10659	-1.34846	14129,14130,15894,16017	Fcgr1,Fcgr2b,Icam1,Ighg1	4/18
1_Member	GO Biological Processes	GO:1905809	negative regulation of synapse organization	-2.10659	-1.34846	11816,13841,19876,24088	Apoe,Epha7,Robo1,Tlr2	4/18
1_Member	GO Biological Processes	GO:0033238	regulation of amine metabolic process	-2.1029	-1.34532	14763,16409,16467,20617,26570,109731	Gpr37,Itgam,Atcay,Snca,Slc7a11,Maob	6/39
1_Member	GO Biological Processes	GO:0042908	xenobiotic transport	-2.1029	-1.34532	14609,20525,20529,30805,69981,239273	Gja1,Slc2a1,Slc31a1,Slc22a4,Tmem30a,Abcc4	6/39
1_Member	GO Biological Processes	GO:0070509	calcium ion import	-2.10206	-1.34502	12288,12290,12296,28240,63873,110891,114774,216001	Cacna1c,Cacna1e,Cacnb2,Trpm2,Trpv4,Slc8a2,Pawr,Micu1	8/39
1_Member	KEGG Pathway	mmu00250	Alanine, aspartate and glutamate metabolism - Mus musculus (house mouse)	-2.10206	-1.34502	11484,11565,11898,53320,108682,216456,227231,269642	Aspa,Adss1,Ass1,Folh1,Gpt2,Gls2,Cps1,Nat8l	8/39
1_Member	GO Biological Processes	GO:0170036	import into the mitochondrion	-2.10054	-1.34457	14297,22117,66169,67067,67713,67952,68115,70556,216001	Fxn,Tst,Tomm7,Romo1,Dnajc19,Tomm20,Maip1,Slc25a33,Micu1	9/47
1_Member	GO Biological Processes	GO:2000649	regulation of sodium ion transmembrane transporter activity	-2.10054	-1.34457	11931,22629,57816,72821,94253,101118,235281,246317,545622	Atp1b1,Ywhah,Tesc,Scn2b,Hecw1,Tmem168,Scn3b,Neto1,Ptpn3	9/47
1_Member	GO Biological Processes	GO:1903909	regulation of receptor clustering	-2.10052	-1.34457	26570,223254,227753,230235,232813	Slc7a11,Farp1,Gsn,Frrs1l,Shisa7	5/28
1_Member	GO Biological Processes	GO:2000647	negative regulation of stem cell proliferation	-2.10052	-1.34457	12580,15944,18952,19664,235505	Cdkn2c,Irgm1,Septin4,Rbpj,Cd109	5/28
1_Member	KEGG Pathway	mmu05145	Toxoplasmosis - Mus musculus (house mouse)	-2.09964	-1.34396	11652,12043,15944,16403,16412,16451,16779,16835,18033,18035,19697,20846,20848,24088,26416,26420	Akt2,Bcl2,Irgm1,Itga6,Itgb1,Jak1,Lamb2,Ldlr,Nfkb1,Nfkbia,Rela,Stat1,Stat3,Tlr2,Mapk14,Mapk9	16/109
1_Member	GO Biological Processes	GO:0046641	positive regulation of alpha-beta T cell proliferation	-2.09802	-1.34262	13136,14964,14972,15944,18761,19264,22637	Cd55,H2-D1,H2-K1,Irgm1,Prkcq,Ptprc,Zap70	7/51
1_Member	GO Biological Processes	GO:0002040	sprouting angiogenesis	-2.09286	-1.338	21825,57342,105450,672511	Thbs1,Parva,Mmrn2,Rnf213	4/60
1_Member	KEGG Pathway	mmu04659	Th17 cell differentiation - Mus musculus (house mouse)	-2.08198	-1.32856	14961,16451,18033,18761,19055,19056,19058,20846,20848,22637,26416	H2-Ab1,Jak1,Nfkb1,Prkcq,Ppp3ca,Ppp3cb,Ppp3r1,Stat1,Stat3,Zap70,Mapk14	11/105
1_Member	GO Biological Processes	GO:0010665	regulation of cardiac muscle cell apoptotic process	-2.08181	-1.32856	11606,12322,12334,16202,19317,26897,223864,243912	Agt,Camk2a,Capn2,Ilk,Qki,Acot1,Rapgef3,Hspb6	8/64
1_Member	GO Biological Processes	GO:0051057	positive regulation of small GTPase mediated signal transduction	-2.07874	-1.32576	11806,12175,18129,19419,19876,21648,65079,94176,235611,319939	Apoa1,Bnip2,Notch2,Rasgrp1,Robo1,Dynlt1b,Rtn4r,Dock2,Plxnb1,Tns3	10/91
1_Member	KEGG Pathway	mmu05016	Huntington disease - Mus musculus (house mouse)	-2.07684	-1.32406	11739,11946,11957,12866,14775,14799,14800,14802,16513,16573,17706,17709,17991,17992,18797,20463,20512,20907,21817,22241,22272,26420,28080,53623,66416,66420,66694,67130,67264,71770,72900,74325,108071,232943,102631912	Slc25a4,Atp5f1a,Atp5pf,Cox7a2,Gpx1,Gria1,Gria2,Gria4,Kcnj10,Kif5b,ATP8,COX2,Ndufa2,Ndufa4,Plcb3,Cox7a2l,Slc1a3,Stx1a,Tgm2,Ulk1,Uqcrq,Mapk9,Atp5po,Gria3,Ndufa7,Polr2e,Uqcrfs1,Ndufa6,Ndufb8,Ap2b1,Ndufv2,Cltb,Grm5,Klc3,Ndufb1	35/303
1_Member	GO Biological Processes	GO:0001796	regulation of type IIa hypersensitivity	-2.07221	-1.32153	12266,16016,16017	C3,Ighg2b,Ighg1	3/32
1_Member	GO Biological Processes	GO:0001798	positive regulation of type IIa hypersensitivity	-2.07221	-1.32153	12266,16016,16017	C3,Ighg2b,Ighg1	3/32
1_Member	GO Biological Processes	GO:0002892	regulation of type II hypersensitivity	-2.07221	-1.32153	12266,16016,16017	C3,Ighg2b,Ighg1	3/32
1_Member	GO Biological Processes	GO:0002894	positive regulation of type II hypersensitivity	-2.07221	-1.32153	12266,16016,16017	C3,Ighg2b,Ighg1	3/32
1_Member	GO Biological Processes	GO:1990845	adaptive thermogenesis	-2.07221	-1.32153	11739,63873,212933	Slc25a4,Trpv4,Pm20d1	3/32
1_Member	Reactome Gene Sets	R-MMU-9706574	RHOBTB GTPase Cycle	-2.07221	-1.32153	22352,76626,246710	Vim,Msi2,Rhobtb2	3/32
1_Member	GO Biological Processes	GO:0048864	stem cell development	-2.0715	-1.32109	13618,14268,19264,19378,76626	Ednrb,Fn1,Ptprc,Aldh1a2,Msi2	5/95
1_Member	GO Biological Processes	GO:0043244	regulation of protein-containing complex disassembly	-2.0617	-1.31169	12332,15944,17756,19684,23991,56193,63873,65973,67254,68041,227753,234695,319278	Capg,Irgm1,Map2,Rdx,Cib1,Plek,Trpv4,Asph,Bmerb1,Mid1ip1,Gsn,Carmil2,Shfl	13/135
1_Member	GO Biological Processes	GO:0042593	glucose homeostasis	-2.05767	-1.30846	11829,12288,12290,12953,14226,14775,15361,15894,18605,19055,19326,19662,20501,20848,20912,22329,63873,64297,72674,83433,94109,98415,108155,110095,235380,246730,266690,330817	Aqp4,Cacna1c,Cacna1e,Cry2,Fkbp1b,Gpx1,Hmga1,Icam1,Enpp1,Ppp3ca,Rab11b,Rbp4,Slc16a1,Stat3,Stxbp3,Vcam1,Trpv4,Gprc5b,Adipor1,Trem2,Csmd1,Nucks1,Ogt,Pygl,Dmxl2,Oas1a,Cyb5r4,Dhps	28/230
1_Member	GO Biological Processes	GO:0051250	negative regulation of lymphocyte activation	-2.05688	-1.30794	11847,12505,14130,14964,14972,15170,16149,16331,16768,16854,16859,17096,20971,26362,69769,93695,235587	Arg2,Cd44,Fcgr2b,H2-D1,H2-K1,Ptpn6,Cd74,Inpp5d,Lag3,Lgals3,Lgals9,Lyn,Sdc4,Axl,Tnfaip8l2,Gpnmb,Parp3	17/197
1_Member	GO Biological Processes	GO:0002524	hypersensitivity	-2.05223	-1.30712	14129,14130,16017	Fcgr1,Fcgr2b,Ighg1	3/10
1_Member	GO Biological Processes	GO:0006560	proline metabolic process	-2.05223	-1.30712	18242,19125,209027	Oat,Prodh,Pycr1	3/10
1_Member	GO Biological Processes	GO:0071649	regulation of chemokine (C-C motif) ligand 5 production	-2.05223	-1.30712	11847,63873,228607	Arg2,Trpv4,Mavs	3/10
1_Member	GO Biological Processes	GO:0106015	negative regulation of inflammatory response to wounding	-2.05223	-1.30712	15170,20848,77125	Ptpn6,Stat3,Il33	3/10
1_Member	GO Biological Processes	GO:0106104	regulation of glutamate receptor clustering	-2.05223	-1.30712	26570,230235,232813	Slc7a11,Frrs1l,Shisa7	3/10
1_Member	GO Biological Processes	GO:1904717	regulation of AMPA glutamate receptor clustering	-2.05223	-1.30712	26570,230235,232813	Slc7a11,Frrs1l,Shisa7	3/10
1_Member	GO Biological Processes	GO:1905274	regulation of modification of postsynaptic actin cytoskeleton	-2.05223	-1.30712	17118,30785,108100	Marcks,Cttnbp2,Baiap2	3/10
1_Member	GO Biological Processes	GO:1905603	regulation of blood-brain barrier permeability	-2.05223	-1.30712	20404,21872,21873	Sh3gl2,Tjp1,Tjp2	3/10
1_Member	GO Biological Processes	GO:0051503	adenine nucleotide transport	-2.05222	-1.30712	11732,11739,14609,16423,18439,230125,239273	Ank,Slc25a4,Gja1,Cd47,P2rx7,Slc25a51,Abcc4	7/32
1_Member	GO Biological Processes	GO:0072091	regulation of stem cell proliferation	-2.05207	-1.30712	12580,14182,15944,18952,19106,19264,19664,22601,94223,97165,235505	Cdkn2c,Fgfr1,Irgm1,Septin4,Eif2ak2,Ptprc,Rbpj,Yap1,Dgcr8,Hmgb2,Cd109	11/106
1_Member	Reactome Gene Sets	R-MMU-199418	Negative regulation of the PI3K/AKT network	-2.05207	-1.30712	11652,13649,14182,14388,18717,18719,19354,21802,22324,56212,77125	Akt2,Egfr,Fgfr1,Gab1,Pip5k1c,Pip5k1b,Rac2,Tgfa,Vav1,Rhog,Il33	11/106
1_Member	GO Biological Processes	GO:1900180	regulation of protein localization to nucleus	-2.05159	-0.987079	11815,12298,12385,12488,14061,16451,16905,17472,18753,18761,18769,19056,19164,22042,22218,22601,26416,28036,29810,70769,108155,192176,209200,228607	Apod,Cacnb4,Ctnna1,Cd2ap,F2,Jak1,Lmna,Gbp4,Prkcd,Prkcq,Pkig,Ppp3cb,Psen1,Tfrc,Sumo1,Yap1,Mapk14,Larp7,Bag3,Nolc1,Ogt,Flna,Dtx3l,Mavs	24/166
1_Member	GO Biological Processes	GO:2001235	positive regulation of apoptotic signaling pathway	-2.04841	-1.30425	12323,13036,13040,19264,20201,21825,27050	Camk2b,Ctsh,Ctss,Ptprc,S100a8,Thbs1,Rps3	7/176
1_Member	GO Biological Processes	GO:0070301	cellular response to hydrogen peroxide	-2.0433	-1.2998	14297,16952,22068,27050	Fxn,Anxa1,Trpc6,Rps3	4/62
1_Member	GO Biological Processes	GO:1905953	negative regulation of lipid localization	-2.0433	-1.2998	11957,13884,14297,21825	Atp5pf,Ces1c,Fxn,Thbs1	4/62
1_Member	GO Biological Processes	GO:0002861	regulation of inflammatory response to antigenic stimulus	-2.04196	-1.29859	14127,14129,14130,14964,14972,16017,18168,83433	Fcer1g,Fcgr1,Fcgr2b,H2-D1,H2-K1,Ighg1,Npy5r,Trem2	8/65
1_Member	GO Biological Processes	GO:0048536	spleen development	-2.03984	-1.29727	11491,12043,12298,13828,16889,18514,234069,320795,381305	Adam17,Bcl2,Cacnb4,Epb42,Lipa,Pbx1,Pcid2,Pkn1,Rc3h1	9/48
1_Member	GO Biological Processes	GO:0042058	regulation of epidermal growth factor receptor signaling pathway	-2.03773	-1.29542	11491,11606,13649,13650,19164,19268,70294,72543,78388,208650,227333	Adam17,Agt,Egfr,Rhbdf1,Psen1,Ptprf,Rnf126,Mvb12b,Mvp,Cblb,Dgkd	11/65
1_Member	GO Biological Processes	GO:0048009	insulin-like growth factor receptor signaling pathway	-2.035	-1.29503	16367,16653,20238	Irs1,Kras,Atxn1	3/33
1_Member	GO Biological Processes	GO:0090311	regulation of protein deacetylation	-2.035	-1.29503	13548,17762,208146	Dyrk1a,Mapt,Yeats2	3/33
1_Member	GO Biological Processes	GO:0015701	bicarbonate transport	-2.03465	-1.29503	12351,20533,20535,20536,54403	Car4,Slc4a1,Slc4a2,Slc4a3,Slc4a4	5/18
1_Member	GO Biological Processes	GO:1902514	regulation of calcium ion transmembrane transport via high voltage-gated calcium channel	-2.03465	-1.29503	12288,12293,12295,12296,14381	Cacna1c,Cacna2d1,Cacnb1,Cacnb2,G6pdx	5/18
1_Member	GO Biological Processes	GO:0010761	fibroblast migration	-2.03458	-1.29503	16202,18133,18854,20397,29875	Ilk,Ccn3,Pml,Sgpl1,Iqgap1	5/29
1_Member	GO Biological Processes	GO:0034104	negative regulation of tissue remodeling	-2.03458	-1.29503	11606,12494,13010,16331,18439	Agt,Cd38,Cst3,Inpp5d,P2rx7	5/29
1_Member	GO Biological Processes	GO:0045940	positive regulation of steroid metabolic process	-2.03429	-1.29487	11806,11816,13132,13884,14599,19317,110196,235623	Apoa1,Apoe,Dab2,Ces1c,Gh,Qki,Fdps,Scap	8/40
1_Member	GO Biological Processes	GO:0080135	regulation of cellular response to stress	-2.03369	-1.2944	11491,12018,12122,12505,12759,12803,13649,13838,14130,14824,16149,17096,17974,18213,18477,18854,18950,19106,19268,20848,21838,22070,26570,54418,65079,65106,66333,69219,72736,76893,77006,83431,192176,216049,235587,237847	Adam17,Bak1,Bid,Cd44,Clu,Cntf,Egfr,Epha4,Fcgr2b,Grn,Cd74,Lyn,Nck2,Ntrk3,Prdx1,Pml,Pnp,Eif2ak2,Ptprf,Stat3,Thy1,Tpt1,Slc7a11,Fmn2,Rtn4r,Arl6ip5,Aqp11,Ddah1,Tmx1,Cers2,Ddrgk1,Ndel1,Flna,Zfp365,Parp3,Rtn4rl1	36/523
1_Member	GO Biological Processes	GO:0033500	carbohydrate homeostasis	-2.03312	-1.29396	11829,12288,12290,12953,14226,14775,15361,15894,18605,19055,19326,19662,20501,20848,20912,22329,63873,64297,72674,83433,94109,98415,108155,110095,235380,246730,266690,330817	Aqp4,Cacna1c,Cacna1e,Cry2,Fkbp1b,Gpx1,Hmga1,Icam1,Enpp1,Ppp3ca,Rab11b,Rbp4,Slc16a1,Stat3,Stxbp3,Vcam1,Trpv4,Gprc5b,Adipor1,Trem2,Csmd1,Nucks1,Ogt,Pygl,Dmxl2,Oas1a,Cyb5r4,Dhps	28/231
1_Member	GO Biological Processes	GO:0034504	protein localization to nucleus	-2.03287	-1.29384	11606,12953,16367,16905,16969,18035,18854,19055,19058,20848,22218,56338,66306,67025,71177,77125,102774,110379,110862,208263,212518,214585,223697,238799,240832	Agt,Cry2,Irs1,Lmna,Zbtb7a,Nfkbia,Pml,Ppp3ca,Ppp3r1,Stat3,Sumo1,Txnip,Fam53c,Rpl11,Ints13,Il33,Bbs4,Sec13,Kcnq3,Tor1aip1,Sprn,Spg11,Sun2,Tnpo1,Tor1aip2	25/200
1_Member	GO Biological Processes	GO:0006641	triglyceride metabolic process	-2.0288	-1.29016	11816,11818,12359,12894,13167,14732,14775,16889,17777,30805,227231,238055	Apoe,Apoh,Cat,Cpt1a,Dbi,Gpam,Gpx1,Lipa,Mttp,Slc22a4,Cps1,Apob	12/74
1_Member	GO Biological Processes	GO:0098656	monoatomic anion transmembrane transport	-2.0288	-1.29016	14394,14395,14401,14402,14403,20496,20512,20533,83704,105722,110886,382014	Gabra1,Gabra2,Gabrb2,Gabrb3,Gabrd,Slc12a2,Slc1a3,Slc4a1,Slc12a9,Ano6,Gabra5,Ano8	12/74
1_Member	GO Biological Processes	GO:0002347	response to tumor cell	-2.02276	-1.28582	14964,14972,18129,19697,56338,66610	H2-D1,H2-K1,Notch2,Rela,Txnip,Abi3	6/25
1_Member	GO Biological Processes	GO:0050860	negative regulation of T cell receptor signaling pathway	-2.02276	-1.28582	15170,16854,21838,22350,114774,208650	Ptpn6,Lgals3,Thy1,Ezr,Pawr,Cblb	6/25
1_Member	GO Biological Processes	GO:1903306	negative regulation of regulated secretory pathway	-2.02276	-1.28582	15368,16859,20912,94090,105855,109880	Hmox1,Lgals9,Stxbp3,Trim9,Nckap1l,Braf	6/25
1_Member	WikiPathways	WP4344	Sphingolipid metabolism overview	-2.02276	-1.28582	11886,20397,22239,76893,223753,241447	Asah1,Sgpl1,Ugt8a,Cers2,Cerk,Cers6	6/25
1_Member	GO Biological Processes	GO:0043406	positive regulation of MAP kinase activity	-2.02262	-1.28581	13649,13838,14182,14388,18213,18439,19264,19419,19876,26382,93840	Egfr,Epha4,Fgfr1,Gab1,Ntrk3,P2rx7,Ptprc,Rasgrp1,Robo1,Fgd2,Vangl2	11/107
1_Member	Reactome Gene Sets	R-MMU-195721	Signaling by WNT	-2.02067	-1.28423	11652,11772,12322,14296,14701,14702,16913,18719,18797,19055,19056,19058,19171,19186,19188,19354,56811,74325,94253	Akt2,Ap2a2,Camk2a,Frat1,Gng12,Gng2,Psmb8,Pip5k1b,Plcb3,Ppp3ca,Ppp3cb,Ppp3r1,Psmb10,Psme1,Psme2,Rac2,Dkk2,Cltb,Hecw1	19/231
1_Member	GO Biological Processes	GO:0051604	protein maturation	-2.01961	-1.28423	13036,13040,14066,14297,15507,66897,67618,70646,99571,114896,192176,226043,243912	Ctsh,Ctss,F3,Fxn,Hspb1,Naa16,Aasdhppt,Naa30,Fgg,Afg3l1,Flna,Zng1,Hspb6	13/468
1_Member	GO Biological Processes	GO:0002921	negative regulation of humoral immune response	-2.0196	-1.28423	13136,14130,15170,232345	Cd55,Fcgr2b,Ptpn6,A2m	4/19
1_Member	GO Biological Processes	GO:0007614	short-term memory	-2.0196	-1.28423	12307,54720,56710,108073	Calb1,Rcan1,Brinp1,Grm7	4/19
1_Member	GO Biological Processes	GO:0032602	chemokine production	-2.0196	-1.28423	18033,24088,77125,142980	Nfkb1,Tlr2,Il33,Tlr3	4/19
1_Member	GO Biological Processes	GO:0046348	amino sugar catabolic process	-2.0196	-1.28423	11668,19703,74091,245847	Aldh1a1,Renbp,Npl,Amdhd2	4/19
1_Member	GO Biological Processes	GO:0097720	calcineurin-mediated signaling	-2.0196	-1.28423	19055,19056,19058,54720	Ppp3ca,Ppp3cb,Ppp3r1,Rcan1	4/19
1_Member	GO Biological Processes	GO:0032655	regulation of interleukin-12 production	-2.01923	-1.28423	21825,24088,108655,142980	Thbs1,Tlr2,Foxp1,Tlr3	4/63
1_Member	KEGG Pathway	mmu00561	Glycerolipid metabolism - Mus musculus (house mouse)	-2.01923	-1.28423	14187,52123,72535,381925	Akr1b8,Agpat5,Aldh1b1,Plpp4	4/63
1_Member	GO Biological Processes	GO:0032868	response to insulin	-2.01544	-1.2807	11652,12488,14732,16332,19662,20525,20912,22318,23830,26416,63873,83431,97212,106572,235344,235623,320706	Akt2,Cd2ap,Gpam,Inppl1,Rbp4,Slc2a1,Stxbp3,Vamp2,Capn10,Mapk14,Trpv4,Ndel1,Hadha,Rab31,Sik2,Scap,Mtcl2	17/199
1_Member	GO Biological Processes	GO:0060348	bone development	-2.01324	-1.27889	12111,12628,19264,21825,63873,108655,270106,403187	Bgn,Cfh,Ptprc,Thbs1,Trpv4,Foxp1,Rpl13,Opa3	8/223
1_Member	GO Biological Processes	GO:0045824	negative regulation of innate immune response	-2.01052	-1.2763	14824,14964,14972,16859,20847,21354,21355,56045,64685,228607,232345,246730,100038882	Grn,H2-D1,H2-K1,Lgals9,Stat2,Tap1,Tap2,Samhd1,Nmi,Mavs,A2m,Oas1a,Isg15	13/137
1_Member	GO Biological Processes	GO:0097191	extrinsic apoptotic signaling pathway	-2.0099	-1.2758	12018,12043,12122,12385,13043,13132,16668,16691,18439,18854,19264,22601,29810,67755,71609,77125,142980	Bak1,Bcl2,Bid,Ctnna1,Cttn,Dab2,Krt18,Krt8,P2rx7,Pml,Ptprc,Yap1,Bag3,Ddx47,Tradd,Il33,Tlr3	17/121
1_Member	GO Biological Processes	GO:0009308	amine metabolic process	-2.00842	-1.27459	11754,13195,14763,18948,20617,20887,21743,21823,22329,69215,105501,109731,140483,216343,330817	Aoc3,Ddc,Gpr37,Pnmt,Snca,Sult1a1,Inmt,Th,Vcam1,Sat2,Abhd4,Maob,Hnmt,Tph2,Dhps	15/102
1_Member	GO Biological Processes	GO:0042440	pigment metabolic process	-2.00545	-1.27304	12043,14297,15368,15458,19044,22063,66154,216792,233016,266690	Bcl2,Fxn,Hmox1,Hpx,Ppox,Trpc1,Tmem14c,Iba57,Blvrb,Cyb5r4	10/57
1_Member	GO Biological Processes	GO:0019227	neuronal action potential propagation	-2.00341	-1.27304	12298,14226,18213,98660	Cacnb4,Fkbp1b,Ntrk3,Atp1a2	4/12
1_Member	GO Biological Processes	GO:0019471	4-hydroxyproline metabolic process	-2.00341	-1.27304	18451,18453,53381,74443	P4ha1,P4hb,Prdx4,P4htm	4/12
1_Member	GO Biological Processes	GO:0036151	phosphatidylcholine acyl-chain remodeling	-2.00341	-1.27304	13167,14792,99010,270084	Dbi,Lpcat3,Lpcat4,Lpcat2	4/12
1_Member	GO Biological Processes	GO:0042416	dopamine biosynthetic process	-2.00341	-1.27304	13195,14763,20617,21823	Ddc,Gpr37,Snca,Th	4/12
1_Member	GO Biological Processes	GO:0050774	negative regulation of dendrite morphogenesis	-2.00341	-1.27304	19055,22068,22629,76089	Ppp3ca,Trpc6,Ywhah,Rapgef2	4/12
1_Member	GO Biological Processes	GO:0051964	negative regulation of synapse assembly	-2.00341	-1.27304	13841,19876,24088,74762	Epha7,Robo1,Tlr2,Mdga1	4/12
1_Member	GO Biological Processes	GO:0098814	spontaneous synaptic transmission	-2.00341	-1.27304	19894,20979,116837,116838	Rph3a,Syt1,Rims1,Rims2	4/12
1_Member	GO Biological Processes	GO:0098870	action potential propagation	-2.00341	-1.27304	12298,14226,18213,98660	Cacnb4,Fkbp1b,Ntrk3,Atp1a2	4/12
1_Member	GO Biological Processes	GO:0099550	trans-synaptic signaling, modulating synaptic transmission	-2.00341	-1.27304	13643,13844,18815,108071	Efnb3,Ephb2,Plg,Grm5	4/12
1_Member	GO Biological Processes	GO:1904729	regulation of intestinal lipid absorption	-2.00341	-1.27304	11806,11808,13124,14792	Apoa1,Apoa4,Cyp8b1,Lpcat3	4/12
1_Member	GO Biological Processes	GO:1905146	lysosomal protein catabolic process	-2.00341	-1.27304	12751,14824,71900,195040	Tpp1,Grn,Tmem106b,Tmem199	4/12
1_Member	GO Biological Processes	GO:2000562	negative regulation of CD4-positive, alpha-beta T cell proliferation	-2.00341	-1.27304	11847,12505,16859,208650	Arg2,Cd44,Lgals9,Cblb	4/12
1_Member	PANTHER Pathway	P06664	Gonadotropin-releasing hormone receptor pathway	-2.00341	-1.27304	11808,14432,18605,19264	Apoa4,Gap43,Enpp1,Ptprc	4/12
1_Member	Reactome Gene Sets	R-MMU-111447	Activation of BAD and translocation to mitochondria	-2.00341	-1.27304	12043,12122,19058,22629	Bcl2,Bid,Ppp3r1,Ywhah	4/12
1_Member	Reactome Gene Sets	R-MMU-1679131	Trafficking and processing of endosomal TLR	-2.00341	-1.27304	13030,13040,19141,54445	Ctsb,Ctss,Lgmn,Unc93b1	4/12
1_Member	Reactome Gene Sets	R-MMU-2024101	CS/DS degradation	-2.00341	-1.27304	11881,12111,15211,15212	Arsb,Bgn,Hexa,Hexb	4/12
1_Member	Reactome Gene Sets	R-MMU-75205	Dissolution of Fibrin Clot	-2.00341	-1.27304	12306,18815,20720,94175	Anxa2,Plg,Serpine2,Hrg	4/12
1_Member	Reactome Gene Sets	R-MMU-9755088	Ribavirin ADME	-2.00341	-1.27304	11486,11534,18950,71279	Ada,Adk,Pnp,Slc29a3	4/12
1_Member	GO Biological Processes	GO:1902692	regulation of neuroblast proliferation	-2.00302	-1.27304	12385,12950,13003,13051,16412,18129,67666,73940	Ctnna1,Hapln1,Vcan,Cx3cr1,Itgb1,Notch2,Hapln3,Hapln2	8/66
1_Member	Reactome Gene Sets	R-MMU-72766	Translation	-2.00227	-1.27242	19921,19951,26451,27050,60441,68028,68572,270106	Rpl19,Rpl32,Rpl27a,Rps3,Mrpl38,Rpl22l1,Mrpl58,Rpl13	8/224
2_Summary	GO Biological Processes	GO:0050808	synapse organization	-34.8854	-30.6247	11352,11418,11487,11816,11840,11941,12217,12259,12260,12262,12266,12295,12296,12297,12298,12300,12386,12488,12565,12647,12891,13043,13051,13169,13641,13642,13838,13839,13844,14394,14395,14401,14402,14735,14799,14811,14824,16180,16409,16412,16779,17762,17920,18164,18186,18191,18213,19024,19141,19164,19268,19280,19339,19894,20404,20617,20964,21923,22350,26422,26875,50997,54725,56747,67453,72333,743…	Abl2,Asic2,Adam10,Apoe,Arf1,Atp2b2,Bsn,C1qa,C1qb,C1qc,C3,Cacnb1,Cacnb2,Cacnb3,Cacnb4,Cacng2,Ctnna2,Cd2ap,Cdh9,Chat,Cpne6,Cttn,Cx3cr1,Dbnl,Efnb1,Efnb2,Epha4,Epha5,Ephb2,Gabra1,Gabra2,Gabrb2,Gabrb3,Gpc4,Gria1,Grin2a,Grn,Il1rap,Itgam,Itgb1,Lamb2,Mapt,Myo6,Nptx1,Nrp1,Nrxn3,Ntrk3,Ppfibp2,Lgmn,Psen1,Ptprf,Ptprs,Rab3a,Rph3a,Sh3gl2,Snca,Syn1,Tnc,Ezr,Nbea,Pclo,Mpp2,Cadm1,Sez6l,Slc25a46,Palld,Lrrtm1,Ppfia3…	145/-
2_Member	GO Biological Processes	GO:0050808	synapse organization	-34.8854	-30.6247	11352,11418,11487,11816,11840,11941,12217,12259,12260,12262,12266,12295,12296,12297,12298,12300,12386,12488,12565,12647,12891,13043,13051,13169,13641,13642,13838,13839,13844,14394,14395,14401,14402,14735,14799,14811,14824,16180,16409,16412,16779,17762,17920,18164,18186,18191,18213,19024,19141,19164,19268,19280,19339,19894,20404,20617,20964,21923,22350,26422,26875,50997,54725,56747,67453,72333,743…	Abl2,Asic2,Adam10,Apoe,Arf1,Atp2b2,Bsn,C1qa,C1qb,C1qc,C3,Cacnb1,Cacnb2,Cacnb3,Cacnb4,Cacng2,Ctnna2,Cd2ap,Cdh9,Chat,Cpne6,Cttn,Cx3cr1,Dbnl,Efnb1,Efnb2,Epha4,Epha5,Ephb2,Gabra1,Gabra2,Gabrb2,Gabrb3,Gpc4,Gria1,Grin2a,Grn,Il1rap,Itgam,Itgb1,Lamb2,Mapt,Myo6,Nptx1,Nrp1,Nrxn3,Ntrk3,Ppfibp2,Lgmn,Psen1,Ptprf,Ptprs,Rab3a,Rph3a,Sh3gl2,Snca,Syn1,Tnc,Ezr,Nbea,Pclo,Mpp2,Cadm1,Sez6l,Slc25a46,Palld,Lrrtm1,Ppfia3…	113/358
2_Member	GO Biological Processes	GO:0034330	cell junction organization	-32.7169	-28.7573	11352,11418,11487,11816,11840,11941,12043,12217,12259,12260,12262,12266,12295,12296,12297,12298,12300,12385,12386,12488,12527,12552,12564,12565,12647,12737,12891,12978,13043,13051,13169,13641,13642,13838,13839,13844,14268,14394,14395,14401,14402,14609,14623,14735,14799,14811,14824,16180,16409,16412,16779,17528,17762,17920,18164,18186,18191,18213,18223,18417,18613,19024,19141,19164,19229,19268,192…	Abl2,Asic2,Adam10,Apoe,Arf1,Atp2b2,Bcl2,Bsn,C1qa,C1qb,C1qc,C3,Cacnb1,Cacnb2,Cacnb3,Cacnb4,Cacng2,Ctnna1,Ctnna2,Cd2ap,Cd9,Cdh11,Cdh8,Cdh9,Chat,Cldn1,Cpne6,Csf1r,Cttn,Cx3cr1,Dbnl,Efnb1,Efnb2,Epha4,Epha5,Ephb2,Fn1,Gabra1,Gabra2,Gabrb2,Gabrb3,Gja1,Gjb6,Gpc4,Gria1,Grin2a,Grn,Il1rap,Itgam,Itgb1,Lamb2,Mpz,Mapt,Myo6,Nptx1,Nrp1,Nrxn3,Ntrk3,Numbl,Cldn11,Pecam1,Ppfibp2,Lgmn,Psen1,Ptk2b,Ptprf,Ptprs,Pxn,Rab3a…	145/572
2_Member	GO Biological Processes	GO:0034329	cell junction assembly	-11.7997	-9.58431	11418,12043,12217,12385,12527,12552,12564,12565,12737,13043,13169,13641,13642,13844,14268,14394,14395,14401,14402,14623,14799,16412,17762,17920,18164,18191,18213,18417,18613,19229,19280,19303,21838,21894,22239,22330,26875,50768,54725,63873,67453,75739,83964,93742,109333,110886,140570,171171,223254,226359,226422,227580,231830,234267,235611,245537,320873,331461,100113365	Asic2,Bcl2,Bsn,Ctnna1,Cd9,Cdh11,Cdh8,Cdh9,Cldn1,Cttn,Dbnl,Efnb1,Efnb2,Ephb2,Fn1,Gabra1,Gabra2,Gabrb2,Gabrb3,Gjb6,Gria1,Itgb1,Mapt,Myo6,Nptx1,Nrxn3,Ntrk3,Cldn11,Pecam1,Ptk2b,Ptprs,Pxn,Thy1,Tln1,Ugt8a,Vcl,Pclo,Dlc1,Cadm1,Trpv4,Slc25a46,Mpp7,Jam3,Pard3,Pkn2,Gabra5,Plxnb2,Ntng2,Farp1,C1ql2,Rab29,C1ql3,Micall2,Gpm6a,Plxnb1,Nlgn3,Cdh10,Il1rapl1,Nlgn4l	59/288
2_Member	GO Biological Processes	GO:0007416	synapse assembly	-11.2692	-9.12244	11418,12217,12565,13169,13641,13642,13844,14394,14395,14401,14402,14799,17762,17920,18164,18191,18213,19280,26875,54725,67453,110886,140570,171171,223254,226359,226422,227580,234267,235611,245537,331461,100113365	Asic2,Bsn,Cdh9,Dbnl,Efnb1,Efnb2,Ephb2,Gabra1,Gabra2,Gabrb2,Gabrb3,Gria1,Mapt,Myo6,Nptx1,Nrxn3,Ntrk3,Ptprs,Pclo,Cadm1,Slc25a46,Gabra5,Plxnb2,Ntng2,Farp1,C1ql2,Rab29,C1ql3,Gpm6a,Plxnb1,Nlgn3,Il1rapl1,Nlgn4l	33/112
3_Summary	GO Biological Processes	GO:0120035	regulation of plasma membrane bounded cell projection organization	-29.2353	-25.4517	11352,11487,11491,11512,11606,11816,11838,11881,11932,12010,12305,12323,12345,12386,12492,12494,12505,12803,12904,13047,13131,13132,13169,13176,13430,13642,13643,13803,13838,13841,13844,14130,14182,14226,14268,14297,14299,14348,14432,14580,14745,14824,14964,14972,15507,15894,16202,16332,16403,16412,16570,16852,17096,17118,17196,17751,17756,17758,17762,18186,18213,18223,18439,18606,18753,18761,188…	Abl2,Adam10,Adam17,Adcy6,Agt,Apoe,Arc,Arsb,Atp1b2,B2m,Ddr1,Camk2b,Capzb,Ctnna2,Scarb2,Cd38,Cd44,Cntf,Crabp2,Cux1,Dab1,Dab2,Dbnl,Dcc,Dnm2,Efnb2,Efnb3,Enc1,Epha4,Epha7,Ephb2,Fcgr2b,Fgfr1,Fkbp1b,Fn1,Fxn,Ncs1,Fut9,Gap43,Gfap,Lpar1,Grn,H2-D1,H2-K1,Hspb1,Icam1,Ilk,Inppl1,Itga6,Itgb1,Kif3c,Lgals1,Lyn,Marcks,Mbp,Mt3,Map2,Map4,Mapt,Nrp1,Ntrk3,Numbl,P2rx7,Enpp2,Prkcd,Prkcq,Pld1,Plxna1,Ppp3ca,Psen1,Ptbp1,Pt…	242/-
3_Member	GO Biological Processes	GO:0120035	regulation of plasma membrane bounded cell projection organization	-29.2353	-25.4517	11352,11487,11491,11512,11606,11816,11838,11881,11932,12010,12305,12323,12345,12386,12492,12494,12505,12803,12904,13047,13131,13132,13169,13176,13430,13642,13643,13803,13838,13841,13844,14130,14182,14226,14268,14297,14299,14348,14432,14580,14745,14824,14964,14972,15507,15894,16202,16332,16403,16412,16570,16852,17096,17118,17196,17751,17756,17758,17762,18186,18213,18223,18439,18606,18753,18761,188…	Abl2,Adam10,Adam17,Adcy6,Agt,Apoe,Arc,Arsb,Atp1b2,B2m,Ddr1,Camk2b,Capzb,Ctnna2,Scarb2,Cd38,Cd44,Cntf,Crabp2,Cux1,Dab1,Dab2,Dbnl,Dcc,Dnm2,Efnb2,Efnb3,Enc1,Epha4,Epha7,Ephb2,Fcgr2b,Fgfr1,Fkbp1b,Fn1,Fxn,Ncs1,Fut9,Gap43,Gfap,Lpar1,Grn,H2-D1,H2-K1,Hspb1,Icam1,Ilk,Inppl1,Itga6,Itgb1,Kif3c,Lgals1,Lyn,Marcks,Mbp,Mt3,Map2,Map4,Mapt,Nrp1,Ntrk3,Numbl,P2rx7,Enpp2,Prkcd,Prkcq,Pld1,Plxna1,Ppp3ca,Psen1,Ptbp1,Pt…	170/787
3_Member	GO Biological Processes	GO:0010975	regulation of neuron projection development	-22.8725	-19.7879	11352,11487,11491,11512,11606,11816,11838,11881,11932,12010,12305,12323,12386,12492,12494,12803,12904,13047,13131,13132,13169,13176,13642,13643,13803,13838,13841,13844,14182,14226,14268,14297,14299,14348,14580,14745,14824,14964,14972,15507,16202,16332,16403,16412,16570,16852,17096,17118,17196,17751,17756,17762,18186,18213,18223,18844,19055,19164,19205,19229,19268,19280,19317,19876,20311,20562,205…	Abl2,Adam10,Adam17,Adcy6,Agt,Apoe,Arc,Arsb,Atp1b2,B2m,Ddr1,Camk2b,Ctnna2,Scarb2,Cd38,Cntf,Crabp2,Cux1,Dab1,Dab2,Dbnl,Dcc,Efnb2,Efnb3,Enc1,Epha4,Epha7,Ephb2,Fgfr1,Fkbp1b,Fn1,Fxn,Ncs1,Fut9,Gfap,Lpar1,Grn,H2-D1,H2-K1,Hspb1,Ilk,Inppl1,Itga6,Itgb1,Kif3c,Lgals1,Lyn,Marcks,Mbp,Mt3,Map2,Mapt,Nrp1,Ntrk3,Numbl,Plxna1,Ppp3ca,Psen1,Ptbp1,Ptk2b,Ptprf,Ptprs,Qki,Robo1,Cxcl5,Slit1,Slit2,Snap91,Serpine2,Spock1,Tb…	129/587
3_Member	GO Biological Processes	GO:0051960	regulation of nervous system development	-19.8149	-16.9159	11418,11421,11484,11595,11816,12010,12306,12385,12724,12904,12950,13003,13032,13047,13138,13169,13643,13649,13838,13841,13844,14061,14268,14297,14580,14599,16180,16202,16411,16412,16653,16835,17096,17196,17751,17762,18129,18186,18213,18223,18606,18844,19055,19164,19268,19280,19317,19697,19876,20203,20238,20562,20563,20616,20720,21648,21817,21838,22068,22241,22352,22601,22629,22671,24088,26364,567…	Asic2,Ace,Aspa,Acan,Apoe,B2m,Anxa2,Ctnna1,Clcn2,Crabp2,Hapln1,Vcan,Ctsc,Cux1,Dag1,Dbnl,Efnb3,Egfr,Epha4,Epha7,Ephb2,F2,Fn1,Fxn,Gfap,Gh,Il1rap,Ilk,Itgax,Itgb1,Kras,Ldlr,Lyn,Mbp,Mt3,Mapt,Notch2,Nrp1,Ntrk3,Numbl,Enpp2,Plxna1,Ppp3ca,Psen1,Ptprf,Ptprs,Qki,Rela,Robo1,S100b,Atxn1,Slit1,Slit2,Snap91,Serpine2,Dynlt1b,Tgm2,Thy1,Trpc6,Ulk1,Vim,Yap1,Ywhah,Rnf112,Tlr2,Adgre5,Brinp1,Rtn4r,Actr2,Jam2,Hapln3,Map…	114/596
3_Member	GO Biological Processes	GO:0050767	regulation of neurogenesis	-15.7085	-12.9375	11421,11484,11595,11816,12010,12306,12323,12385,12724,12904,12950,12978,13003,13047,13051,13131,13138,13169,13643,13649,13838,13841,13844,14061,14268,14297,14580,14599,16202,16412,16653,16835,17096,17118,17196,17751,17756,17762,18129,18186,18213,18223,18606,18844,19055,19164,19268,19280,19317,19697,19876,20238,20562,20563,20616,20720,21648,21817,21838,22068,22241,22352,22601,22629,22671,24088,567…	Ace,Aspa,Acan,Apoe,B2m,Anxa2,Camk2b,Ctnna1,Clcn2,Crabp2,Hapln1,Csf1r,Vcan,Cux1,Cx3cr1,Dab1,Dag1,Dbnl,Efnb3,Egfr,Epha4,Epha7,Ephb2,F2,Fn1,Fxn,Gfap,Gh,Ilk,Itgb1,Kras,Ldlr,Lyn,Marcks,Mbp,Mt3,Map2,Mapt,Notch2,Nrp1,Ntrk3,Numbl,Enpp2,Plxna1,Ppp3ca,Psen1,Ptprf,Ptprs,Qki,Rela,Robo1,Atxn1,Slit1,Slit2,Snap91,Serpine2,Dynlt1b,Tgm2,Thy1,Trpc6,Ulk1,Vim,Yap1,Ywhah,Rnf112,Tlr2,Brinp1,Rtn4r,Actr2,Hapln3,Map3k13,…	101/494
3_Member	GO Biological Processes	GO:0031346	positive regulation of cell projection organization	-14.2138	-11.5866	11352,11491,11606,11816,11881,11932,12305,12323,12492,12803,12904,13047,13169,13176,13430,13803,13838,13844,14182,14226,14268,14297,14348,14824,15507,16202,16403,16412,16570,17096,17118,17762,18186,18213,18223,18439,18606,18761,18844,19205,19229,19268,19317,19354,19876,20311,20616,20720,21648,23790,23969,29875,55978,56699,64297,66713,68743,69710,69981,70839,71461,71751,71900,74053,75788,76089,834…	Abl2,Adam17,Agt,Apoe,Arsb,Atp1b2,Ddr1,Camk2b,Scarb2,Cntf,Crabp2,Cux1,Dbnl,Dcc,Dnm2,Enc1,Epha4,Ephb2,Fgfr1,Fkbp1b,Fn1,Fxn,Fut9,Grn,Hspb1,Ilk,Itga6,Itgb1,Kif3c,Lyn,Marcks,Mapt,Nrp1,Ntrk3,Numbl,P2rx7,Enpp2,Prkcq,Plxna1,Ptbp1,Ptk2b,Ptprf,Qki,Rac2,Robo1,Cxcl5,Snap91,Serpine2,Dynlt1b,Coro1c,Pacsin1,Iqgap1,Ift20,Cdc42ep4,Gprc5b,Actr2,Anln,Arap1,Tmem30a,P2ry12,Ptk7,Map3k13,Tmem106b,Grip1,Smurf1,Rapgef2,N…	94/467
3_Member	GO Biological Processes	GO:0051962	positive regulation of nervous system development	-13.6802	-11.2945	11418,11421,11484,11595,11816,12724,12904,12950,13003,13047,13138,13169,13649,13838,13844,14268,14297,14580,14599,16180,16202,16412,16653,17096,17762,18129,18186,18213,18223,18606,18844,19268,19317,19697,19876,20238,20563,20616,20720,21817,22352,22671,24088,26364,66713,67666,71751,73940,74053,74342,75409,75788,77125,83431,107831,108071,108100,109880,140570,140571,216028,216049,228550,229715,23561…	Asic2,Ace,Aspa,Acan,Apoe,Clcn2,Crabp2,Hapln1,Vcan,Cux1,Dag1,Dbnl,Egfr,Epha4,Ephb2,Fn1,Fxn,Gfap,Gh,Il1rap,Ilk,Itgb1,Kras,Lyn,Mapt,Notch2,Nrp1,Ntrk3,Numbl,Enpp2,Plxna1,Ptprf,Qki,Rela,Robo1,Atxn1,Slit2,Snap91,Serpine2,Tgm2,Vim,Rnf112,Tlr2,Adgre5,Actr2,Hapln3,Map3k13,Hapln2,Grip1,Lrrtm1,Slitrk5,Smurf1,Il33,Ndel1,Adgrb1,Grm5,Baiap2,Braf,Plxnb2,Plxnb3,Lrrtm3,Zfp365,Itpka,Amigo1,Plxnb1,Lingo2,Lrrtm4,Plx…	76/392
3_Member	GO Biological Processes	GO:0010976	positive regulation of neuron projection development	-10.7979	-8.68951	11352,11491,11606,11816,11932,12323,12492,12803,13176,13803,14182,14824,16403,16412,17096,17118,18213,19205,19317,20311,20720,21648,23969,29875,64297,69981,76089,83431,103199,108100,140570,140571,192176,227541,228550,229715,320840,382056	Abl2,Adam17,Agt,Apoe,Atp1b2,Camk2b,Scarb2,Cntf,Dcc,Enc1,Fgfr1,Grn,Itga6,Itgb1,Lyn,Marcks,Ntrk3,Ptbp1,Qki,Cxcl5,Serpine2,Dynlt1b,Pacsin1,Iqgap1,Gprc5b,Tmem30a,Rapgef2,Ndel1,Fig4,Baiap2,Plxnb2,Plxnb3,Flna,Camk1d,Itpka,Amigo1,Negr1,Crtc1	38/239
3_Member	GO Biological Processes	GO:0050769	positive regulation of neurogenesis	-10.6684	-8.56905	11421,11484,11595,11816,12724,12904,12950,13003,13047,13138,13169,13649,13838,13844,14268,14297,14580,14599,16202,16412,16653,17096,17762,18129,18186,18213,18223,18606,18844,19268,19317,19697,19876,20238,20616,20720,21817,22352,22671,24088,66713,67666,71751,73940,74053,75788,77125,83431,108071,108100,109880,140570,140571,216049,228550,229715,235611,243743,268902,320563,331461,665113	Ace,Aspa,Acan,Apoe,Clcn2,Crabp2,Hapln1,Vcan,Cux1,Dag1,Dbnl,Egfr,Epha4,Ephb2,Fn1,Fxn,Gfap,Gh,Ilk,Itgb1,Kras,Lyn,Mapt,Notch2,Nrp1,Ntrk3,Numbl,Enpp2,Plxna1,Ptprf,Qki,Rela,Robo1,Atxn1,Snap91,Serpine2,Tgm2,Vim,Rnf112,Tlr2,Actr2,Hapln3,Map3k13,Hapln2,Grip1,Smurf1,Il33,Ndel1,Grm5,Baiap2,Braf,Plxnb2,Plxnb3,Zfp365,Itpka,Amigo1,Plxnb1,Plxna4,Robo2,Islr2,Il1rapl1,Tnik	62/330
3_Member	GO Biological Processes	GO:0010720	positive regulation of cell development	-8.70295	-6.82065	11421,11484,11486,11595,11816,12043,12349,12724,12904,12950,13003,13047,13121,13138,13169,13649,13838,13844,14268,14297,14580,14599,14609,16149,16202,16409,16412,16456,16653,16859,16952,17096,17762,18129,18186,18213,18223,18606,18844,18950,19055,19264,19268,19317,19419,19697,19876,20238,20616,20720,21817,22352,22637,22671,24088,26362,56456,57816,66713,67666,71751,73940,74053,75788,77125,83431,834…	Ace,Aspa,Ada,Acan,Apoe,Bcl2,Car2,Clcn2,Crabp2,Hapln1,Vcan,Cux1,Cyp51,Dag1,Dbnl,Egfr,Epha4,Ephb2,Fn1,Fxn,Gfap,Gh,Gja1,Cd74,Ilk,Itgam,Itgb1,F11r,Kras,Lgals9,Anxa1,Lyn,Mapt,Notch2,Nrp1,Ntrk3,Numbl,Enpp2,Plxna1,Pnp,Ppp3ca,Ptprc,Ptprf,Qki,Rasgrp1,Rela,Robo1,Atxn1,Snap91,Serpine2,Tgm2,Vim,Zap70,Rnf112,Tlr2,Axl,Actl6a,Tesc,Actr2,Hapln3,Map3k13,Hapln2,Grip1,Smurf1,Il33,Ndel1,Trem2,Actl6b,Nckap1l,Grm5,Bai…	84/566
4_Summary	GO Biological Processes	GO:0099536	synaptic signaling	-28.931	-25.1475	11784,12288,12290,12295,12296,12297,12298,12564,12647,12671,12890,13138,13527,13643,13844,14394,14395,14401,14402,14403,14799,14800,14802,14806,14809,14823,15551,16180,16531,17920,17957,18191,18439,18530,18754,18815,19055,19063,19164,19280,19339,19697,19894,20238,20616,20617,20619,20848,20907,20909,20911,20912,20964,20965,20977,20979,21823,22063,22318,22342,23936,26875,27062,27204,30794,50932,509…	Apba2,Cacna1c,Cacna1e,Cacnb1,Cacnb2,Cacnb3,Cacnb4,Cdh8,Chat,Chrm3,Cplx2,Dag1,Dtna,Efnb3,Ephb2,Gabra1,Gabra2,Gabrb2,Gabrb3,Gabrd,Gria1,Gria2,Gria4,Grik2,Grik5,Grm8,Htr1b,Il1rap,Kcnma1,Myo6,Napb,Nrxn3,P2rx7,Pcdh8,Prkce,Plg,Ppp3ca,Ppt1,Psen1,Ptprs,Rab3a,Rela,Rph3a,Atxn1,Snap91,Snca,Snap23,Stat3,Stx1a,Stx4a,Stxbp2,Stxbp3,Syn1,Syn2,Syp,Syt1,Th,Trpc1,Vamp2,Lin7b,Lynx1,Pclo,Cadps,Syn3,Pdlim4,Mink1,Mpp2,…	209/-
4_Member	GO Biological Processes	GO:0099536	synaptic signaling	-28.931	-25.1475	11784,12288,12290,12295,12296,12297,12298,12564,12647,12671,12890,13138,13527,13643,13844,14394,14395,14401,14402,14403,14799,14800,14802,14806,14809,14823,15551,16180,16531,17920,17957,18191,18439,18530,18754,18815,19055,19063,19164,19280,19339,19697,19894,20238,20616,20617,20619,20848,20907,20909,20911,20912,20964,20965,20977,20979,21823,22063,22318,22342,23936,26875,27062,27204,30794,50932,509…	Apba2,Cacna1c,Cacna1e,Cacnb1,Cacnb2,Cacnb3,Cacnb4,Cdh8,Chat,Chrm3,Cplx2,Dag1,Dtna,Efnb3,Ephb2,Gabra1,Gabra2,Gabrb2,Gabrb3,Gabrd,Gria1,Gria2,Gria4,Grik2,Grik5,Grm8,Htr1b,Il1rap,Kcnma1,Myo6,Napb,Nrxn3,P2rx7,Pcdh8,Prkce,Plg,Ppp3ca,Ppt1,Psen1,Ptprs,Rab3a,Rela,Rph3a,Atxn1,Snap91,Snca,Snap23,Stat3,Stx1a,Stx4a,Stxbp2,Stxbp3,Syn1,Syn2,Syp,Syt1,Th,Trpc1,Vamp2,Lin7b,Lynx1,Pclo,Cadps,Syn3,Pdlim4,Mink1,Mpp2,…	110/443
4_Member	GO Biological Processes	GO:0099537	trans-synaptic signaling	-28.066	-24.4074	11784,12288,12290,12295,12296,12297,12298,12564,12647,12671,12890,13138,13643,13844,14394,14395,14401,14402,14403,14799,14800,14802,14806,14809,14823,15551,16180,16531,17920,17957,18191,18439,18530,18754,18815,19055,19063,19164,19280,19339,19894,20238,20616,20617,20619,20907,20909,20911,20912,20964,20965,20977,20979,21823,22318,22342,23936,26875,27062,27204,30794,50932,50997,53623,54393,54525,547…	Apba2,Cacna1c,Cacna1e,Cacnb1,Cacnb2,Cacnb3,Cacnb4,Cdh8,Chat,Chrm3,Cplx2,Dag1,Efnb3,Ephb2,Gabra1,Gabra2,Gabrb2,Gabrb3,Gabrd,Gria1,Gria2,Gria4,Grik2,Grik5,Grm8,Htr1b,Il1rap,Kcnma1,Myo6,Napb,Nrxn3,P2rx7,Pcdh8,Prkce,Plg,Ppp3ca,Ppt1,Psen1,Ptprs,Rab3a,Rph3a,Atxn1,Snap91,Snca,Snap23,Stx1a,Stx4a,Stxbp2,Stxbp3,Syn1,Syn2,Syp,Syt1,Th,Vamp2,Lin7b,Lynx1,Pclo,Cadps,Syn3,Pdlim4,Mink1,Mpp2,Gria3,Gabbr1,Syt7,Cadm…	101/391
4_Member	GO Biological Processes	GO:0007268	chemical synaptic transmission	-23.5115	-20.3647	11784,12288,12290,12295,12296,12297,12298,12564,12647,12671,12889,12890,14394,14395,14401,14402,14403,14664,14799,14800,14802,14806,14809,14811,14823,15551,16531,17920,17957,18168,18191,18439,18530,18754,19055,19063,19164,19339,19894,20238,20616,20617,20619,20907,20909,20911,20912,20964,20965,20977,20979,21823,22317,22318,22342,23936,26875,27062,27204,30794,50932,50997,53623,54393,54525,57267,640…	Apba2,Cacna1c,Cacna1e,Cacnb1,Cacnb2,Cacnb3,Cacnb4,Cdh8,Chat,Chrm3,Cplx1,Cplx2,Gabra1,Gabra2,Gabrb2,Gabrb3,Gabrd,Slc6a9,Gria1,Gria2,Gria4,Grik2,Grik5,Grin2a,Grm8,Htr1b,Kcnma1,Myo6,Napb,Npy5r,Nrxn3,P2rx7,Pcdh8,Prkce,Ppp3ca,Ppt1,Psen1,Rab3a,Rph3a,Atxn1,Snap91,Snca,Snap23,Stx1a,Stx4a,Stxbp2,Stxbp3,Syn1,Syn2,Syp,Syt1,Th,Vamp1,Vamp2,Lin7b,Lynx1,Pclo,Cadps,Syn3,Pdlim4,Mink1,Mpp2,Gria3,Gabbr1,Syt7,Apba3,…	98/372
4_Member	GO Biological Processes	GO:0098916	anterograde trans-synaptic signaling	-23.5115	-20.3647	11784,12288,12290,12295,12296,12297,12298,12564,12647,12671,12889,12890,14394,14395,14401,14402,14403,14664,14799,14800,14802,14806,14809,14811,14823,15551,16531,17920,17957,18168,18191,18439,18530,18754,19055,19063,19164,19339,19894,20238,20616,20617,20619,20907,20909,20911,20912,20964,20965,20977,20979,21823,22317,22318,22342,23936,26875,27062,27204,30794,50932,50997,53623,54393,54525,57267,640…	Apba2,Cacna1c,Cacna1e,Cacnb1,Cacnb2,Cacnb3,Cacnb4,Cdh8,Chat,Chrm3,Cplx1,Cplx2,Gabra1,Gabra2,Gabrb2,Gabrb3,Gabrd,Slc6a9,Gria1,Gria2,Gria4,Grik2,Grik5,Grin2a,Grm8,Htr1b,Kcnma1,Myo6,Napb,Npy5r,Nrxn3,P2rx7,Pcdh8,Prkce,Ppp3ca,Ppt1,Psen1,Rab3a,Rph3a,Atxn1,Snap91,Snca,Snap23,Stx1a,Stx4a,Stxbp2,Stxbp3,Syn1,Syn2,Syp,Syt1,Th,Vamp1,Vamp2,Lin7b,Lynx1,Pclo,Cadps,Syn3,Pdlim4,Mink1,Mpp2,Gria3,Gabbr1,Syt7,Apba3,…	98/372
4_Member	GO Biological Processes	GO:0099003	vesicle-mediated transport in synapse	-22.1667	-19.1612	11772,11777,11778,11972,11973,11975,12217,12889,12890,13195,13429,13430,14824,17920,17957,18439,19164,19339,19894,20404,20405,20616,20617,20619,20907,20909,20964,20965,20977,20979,21823,22317,22318,23969,26875,27062,27204,54525,64051,64933,66237,67602,71709,71770,72685,72961,74053,76787,94090,109880,110935,116837,116838,171180,218038,238988,241770,245537,271457,381979,382018,100113365	Ap2a2,Ap3s1,Ap3s2,Atp6v0d1,Atp6v1e1,Atp6v0a1,Bsn,Cplx1,Cplx2,Ddc,Dnm1,Dnm2,Grn,Myo6,Napb,P2rx7,Psen1,Rab3a,Rph3a,Sh3gl2,Sh3gl1,Snap91,Snca,Snap23,Stx1a,Stx4a,Syn1,Syn2,Syp,Syt1,Th,Vamp1,Vamp2,Pacsin1,Pclo,Cadps,Syn3,Syt7,Sv2a,Ap3m2,Atp6v1g2,Necap1,Syde1,Ap2b1,Dnajc6,Slc17a7,Grip1,Ppfia3,Trim9,Braf,Atp6v1b1,Rims1,Rims2,Syt12,Amph,Erc2,Rims4,Nlgn3,Rab5a,Brsk1,Unc13a,Nlgn4l	62/176
4_Member	GO Biological Processes	GO:0099504	synaptic vesicle cycle	-21.9697	-18.9878	11777,11778,11972,11973,11975,12217,12889,12890,13195,13429,13430,14824,17957,18439,19164,19339,19894,20404,20405,20616,20617,20619,20907,20909,20964,20965,20977,20979,21823,22317,22318,23969,26875,27062,27204,54525,64051,64933,66237,71709,71770,72685,72961,76787,94090,109880,110935,116837,116838,171180,218038,238988,241770,245537,271457,381979,382018,100113365	Ap3s1,Ap3s2,Atp6v0d1,Atp6v1e1,Atp6v0a1,Bsn,Cplx1,Cplx2,Ddc,Dnm1,Dnm2,Grn,Napb,P2rx7,Psen1,Rab3a,Rph3a,Sh3gl2,Sh3gl1,Snap91,Snca,Snap23,Stx1a,Stx4a,Syn1,Syn2,Syp,Syt1,Th,Vamp1,Vamp2,Pacsin1,Pclo,Cadps,Syn3,Syt7,Sv2a,Ap3m2,Atp6v1g2,Syde1,Ap2b1,Dnajc6,Slc17a7,Ppfia3,Trim9,Braf,Atp6v1b1,Rims1,Rims2,Syt12,Amph,Erc2,Rims4,Nlgn3,Rab5a,Brsk1,Unc13a,Nlgn4l	58/157
4_Member	GO Biological Processes	GO:0032940	secretion by cell	-16.1196	-13.4717	11303,11606,11745,12288,12488,12890,13618,14127,14226,14609,15361,16897,16952,17096,17101,17113,17777,17886,17920,18191,18439,18717,18754,19056,19063,19164,19215,19285,19326,19339,19340,19419,19894,20616,20617,20619,20720,20907,20909,20911,20912,20964,20965,20972,20973,20974,20979,21817,22318,22342,26362,26875,27062,27204,54525,56193,56807,63873,64051,67295,67397,69146,69908,71709,74760,76257,767…	Abca1,Agt,Anxa3,Cacna1c,Cd2ap,Cplx2,Ednrb,Fcer1g,Fkbp1b,Gja1,Hmga1,Llgl1,Anxa1,Lyn,Lyst,M6pr,Mttp,Myh9,Myo6,Nrxn3,P2rx7,Pip5k1c,Prkce,Ppp3cb,Ppt1,Psen1,Ptgds,Cavin1,Rab11b,Rab3a,Rab3d,Rasgrp1,Rph3a,Snap91,Snca,Snap23,Serpine2,Stx1a,Stx4a,Stxbp2,Stxbp3,Syn1,Syn2,Syngr1,Syngr2,Syngr3,Syt1,Tgm2,Vamp2,Lin7b,Axl,Pclo,Cadps,Syn3,Syt7,Plek,Scamp5,Trpv4,Sv2a,Rab3c,Erp29,Gsdmd,Rab3b,Syde1,Rab3il1,Slc38a3,…	88/448
4_Member	GO Biological Processes	GO:0140352	export from cell	-16.0316	-13.3942	11303,11606,11745,11931,11933,12288,12488,12890,13618,14127,14226,14609,15361,16573,16897,16952,17096,17101,17113,17777,17886,17920,18191,18439,18717,18754,19056,19063,19164,19215,19285,19326,19339,19340,19419,19894,20616,20617,20619,20720,20907,20909,20911,20912,20964,20965,20972,20973,20974,20979,21817,22318,22342,26362,26875,27062,27204,54403,54525,56193,56807,63873,64051,64540,67295,67397,679…	Abca1,Agt,Anxa3,Atp1b1,Atp1b3,Cacna1c,Cd2ap,Cplx2,Ednrb,Fcer1g,Fkbp1b,Gja1,Hmga1,Kif5b,Llgl1,Anxa1,Lyn,Lyst,M6pr,Mttp,Myh9,Myo6,Nrxn3,P2rx7,Pip5k1c,Prkce,Ppp3cb,Ppt1,Psen1,Ptgds,Cavin1,Rab11b,Rab3a,Rab3d,Rasgrp1,Rph3a,Snap91,Snca,Snap23,Serpine2,Stx1a,Stx4a,Stxbp2,Stxbp3,Syn1,Syn2,Syngr1,Syngr2,Syngr3,Syt1,Tgm2,Vamp2,Lin7b,Axl,Pclo,Cadps,Syn3,Slc4a4,Syt7,Plek,Scamp5,Trpv4,Sv2a,Tspan4,Rab3c,Erp29,…	96/514
4_Member	GO Biological Processes	GO:0007269	neurotransmitter secretion	-15.9771	-13.1477	12889,12890,14664,18191,18439,19063,19164,19339,19894,20616,20617,20619,20907,20909,20911,20912,20964,20965,20979,22317,22318,22342,26875,27062,27204,54525,64051,71709,76787,94090,109880,116837,116838,171180,238988,241770,381979,382018	Cplx1,Cplx2,Slc6a9,Nrxn3,P2rx7,Ppt1,Psen1,Rab3a,Rph3a,Snap91,Snca,Snap23,Stx1a,Stx4a,Stxbp2,Stxbp3,Syn1,Syn2,Syt1,Vamp1,Vamp2,Lin7b,Pclo,Cadps,Syn3,Syt7,Sv2a,Syde1,Ppfia3,Trim9,Braf,Rims1,Rims2,Syt12,Erc2,Rims4,Brsk1,Unc13a	38/95
4_Member	GO Biological Processes	GO:0099643	signal release from synapse	-15.9771	-13.1477	12889,12890,14664,18191,18439,19063,19164,19339,19894,20616,20617,20619,20907,20909,20911,20912,20964,20965,20979,22317,22318,22342,26875,27062,27204,54525,64051,71709,76787,94090,109880,116837,116838,171180,238988,241770,381979,382018	Cplx1,Cplx2,Slc6a9,Nrxn3,P2rx7,Ppt1,Psen1,Rab3a,Rph3a,Snap91,Snca,Snap23,Stx1a,Stx4a,Stxbp2,Stxbp3,Syn1,Syn2,Syt1,Vamp1,Vamp2,Lin7b,Pclo,Cadps,Syn3,Syt7,Sv2a,Syde1,Ppfia3,Trim9,Braf,Rims1,Rims2,Syt12,Erc2,Rims4,Brsk1,Unc13a	38/95
4_Member	GO Biological Processes	GO:0046903	secretion	-15.141	-12.5524	11303,11421,11486,11606,11745,11829,11941,12288,12298,12305,12306,12349,12488,12671,12890,13618,14127,14226,14609,15361,16531,16897,16952,17096,17101,17113,17777,17886,17920,18191,18439,18605,18717,18754,19056,19063,19164,19215,19285,19326,19339,19340,19419,19894,20201,20616,20617,20619,20720,20907,20909,20911,20912,20964,20965,20972,20973,20974,20979,21817,22063,22318,22342,26362,26875,27062,272…	Abca1,Ace,Ada,Agt,Anxa3,Aqp4,Atp2b2,Cacna1c,Cacnb4,Ddr1,Anxa2,Car2,Cd2ap,Chrm3,Cplx2,Ednrb,Fcer1g,Fkbp1b,Gja1,Hmga1,Kcnma1,Llgl1,Anxa1,Lyn,Lyst,M6pr,Mttp,Myh9,Myo6,Nrxn3,P2rx7,Enpp1,Pip5k1c,Prkce,Ppp3cb,Ppt1,Psen1,Ptgds,Cavin1,Rab11b,Rab3a,Rab3d,Rasgrp1,Rph3a,S100a8,Snap91,Snca,Snap23,Serpine2,Stx1a,Stx4a,Stxbp2,Stxbp3,Syn1,Syn2,Syngr1,Syngr2,Syngr3,Syt1,Tgm2,Trpc1,Vamp2,Lin7b,Axl,Pclo,Cadps,Syn3…	101/572
4_Member	GO Biological Processes	GO:0006836	neurotransmitter transport	-14.687	-11.9946	12889,12890,13195,14664,16513,18191,18439,19063,19164,19339,19894,20616,20617,20619,20907,20909,20911,20912,20964,20965,20979,21823,22317,22318,22342,26875,27062,27204,54525,64051,64176,71709,72961,76787,94090,98660,103098,109880,116837,116838,171180,238988,241770,381979,382018	Cplx1,Cplx2,Ddc,Slc6a9,Kcnj10,Nrxn3,P2rx7,Ppt1,Psen1,Rab3a,Rph3a,Snap91,Snca,Snap23,Stx1a,Stx4a,Stxbp2,Stxbp3,Syn1,Syn2,Syt1,Th,Vamp1,Vamp2,Lin7b,Pclo,Cadps,Syn3,Syt7,Sv2a,Sv2b,Syde1,Slc17a7,Ppfia3,Trim9,Atp1a2,Slc6a15,Braf,Rims1,Rims2,Syt12,Erc2,Rims4,Brsk1,Unc13a	45/139
4_Member	GO Biological Processes	GO:0023061	signal release	-12.433	-10.0048	11303,11606,12288,12889,12890,13618,14127,14226,14664,15361,16952,17096,18191,18439,18754,19063,19164,19326,19339,19653,19894,20616,20617,20619,20907,20909,20911,20912,20964,20965,20979,21817,22317,22318,22342,26875,27062,27204,54525,63873,64051,71709,76787,94090,109880,116837,116838,171180,227737,238988,239273,241770,266690,381979,382018	Abca1,Agt,Cacna1c,Cplx1,Cplx2,Ednrb,Fcer1g,Fkbp1b,Slc6a9,Hmga1,Anxa1,Lyn,Nrxn3,P2rx7,Prkce,Ppt1,Psen1,Rab11b,Rab3a,Rbm4,Rph3a,Snap91,Snca,Snap23,Stx1a,Stx4a,Stxbp2,Stxbp3,Syn1,Syn2,Syt1,Tgm2,Vamp1,Vamp2,Lin7b,Pclo,Cadps,Syn3,Syt7,Trpv4,Sv2a,Syde1,Ppfia3,Trim9,Braf,Rims1,Rims2,Syt12,Niban2,Erc2,Abcc4,Rims4,Cyb5r4,Brsk1,Unc13a	55/220
4_Member	GO Biological Processes	GO:0016079	synaptic vesicle exocytosis	-11.8277	-9.46447	12889,12890,18439,19164,19339,19894,20617,20619,20907,20909,20979,22317,22318,26875,27062,54525,64051,71709,76787,94090,109880,116837,116838,171180,238988,241770,382018	Cplx1,Cplx2,P2rx7,Psen1,Rab3a,Rph3a,Snca,Snap23,Stx1a,Stx4a,Syt1,Vamp1,Vamp2,Pclo,Cadps,Syt7,Sv2a,Syde1,Ppfia3,Trim9,Braf,Rims1,Rims2,Syt12,Erc2,Rims4,Unc13a	27/66
4_Member	GO Biological Processes	GO:0045055	regulated exocytosis	-11.712	-9.512	11745,12288,12890,14127,17096,17886,18439,19056,19164,19215,19326,19339,19419,19894,20617,20619,20907,20909,20965,20972,20973,20974,20979,22318,26875,27062,54525,56193,64051,71709,76787,94090,106572,109880,116837,116838,171180,238988,241556,241770,382018	Anxa3,Cacna1c,Cplx2,Fcer1g,Lyn,Myh9,P2rx7,Ppp3cb,Psen1,Ptgds,Rab11b,Rab3a,Rasgrp1,Rph3a,Snca,Snap23,Stx1a,Stx4a,Syn2,Syngr1,Syngr2,Syngr3,Syt1,Vamp2,Pclo,Cadps,Syt7,Plek,Sv2a,Syde1,Ppfia3,Trim9,Rab31,Braf,Rims1,Rims2,Syt12,Erc2,Tspan18,Rims4,Unc13a	41/159
4_Member	GO Biological Processes	GO:0006887	exocytosis	-11.4456	-9.26885	11745,12288,12890,14127,16897,17096,17886,18439,18717,19056,19164,19215,19326,19339,19340,19419,19894,20617,20619,20907,20909,20911,20912,20965,20972,20973,20974,20979,22318,22342,26875,27062,54525,56193,56807,64051,67295,69908,71709,74760,76787,94090,106572,109880,110862,116837,116838,171180,213469,216363,238988,241556,241770,382018	Anxa3,Cacna1c,Cplx2,Fcer1g,Llgl1,Lyn,Myh9,P2rx7,Pip5k1c,Ppp3cb,Psen1,Ptgds,Rab11b,Rab3a,Rab3d,Rasgrp1,Rph3a,Snca,Snap23,Stx1a,Stx4a,Stxbp2,Stxbp3,Syn2,Syngr1,Syngr2,Syngr3,Syt1,Vamp2,Lin7b,Pclo,Cadps,Syt7,Plek,Scamp5,Sv2a,Rab3c,Rab3b,Syde1,Rab3il1,Ppfia3,Trim9,Rab31,Braf,Kcnq3,Rims1,Rims2,Syt12,Lgi3,Rab3ip,Erc2,Tspan18,Rims4,Unc13a	54/255
5_Summary	GO Biological Processes	GO:0098657	import into cell	-27.7142	-24.2317	11303,11352,11629,11745,11772,11777,11778,11816,11838,11931,11932,11933,11989,12288,12290,12300,12475,12492,12505,12527,13043,13132,13169,13429,13430,13854,14127,14129,14130,14580,14664,14799,14800,14816,14824,15530,15551,16016,16017,16332,16409,16412,16414,16513,16520,16835,16889,16952,17101,17533,17886,17913,17920,17957,18145,18439,18613,18717,18753,18806,19063,19164,19662,20404,20405,20496,205…	Abca1,Abl2,Aif1,Anxa3,Ap2a2,Ap3s1,Ap3s2,Apoe,Arc,Atp1b1,Atp1b2,Atp1b3,Slc7a3,Cacna1c,Cacna1e,Cacng2,Cd14,Scarb2,Cd44,Cd9,Cttn,Dab2,Dbnl,Dnm1,Dnm2,Epn1,Fcer1g,Fcgr1,Fcgr2b,Gfap,Slc6a9,Gria1,Gria2,Grm1,Grn,Hspg2,Htr1b,Ighg2b,Ighg1,Inppl1,Itgam,Itgb1,Itgb2,Kcnj10,Kcnj4,Ldlr,Lipa,Anxa1,Lyst,Mrc1,Myh9,Myo1c,Myo6,Napb,Npc1,P2rx7,Pecam1,Pip5k1c,Prkcd,Pld2,Ppt1,Psen1,Rbp4,Sh3gl2,Sh3gl1,Slc12a2,Slc1a3,Slc…	152/-
5_Member	GO Biological Processes	GO:0098657	import into cell	-27.7142	-24.2317	11303,11352,11629,11745,11772,11777,11778,11816,11838,11931,11932,11933,11989,12288,12290,12300,12475,12492,12505,12527,13043,13132,13169,13429,13430,13854,14127,14129,14130,14580,14664,14799,14800,14816,14824,15530,15551,16016,16017,16332,16409,16412,16414,16513,16520,16835,16889,16952,17101,17533,17886,17913,17920,17957,18145,18439,18613,18717,18753,18806,19063,19164,19662,20404,20405,20496,205…	Abca1,Abl2,Aif1,Anxa3,Ap2a2,Ap3s1,Ap3s2,Apoe,Arc,Atp1b1,Atp1b2,Atp1b3,Slc7a3,Cacna1c,Cacna1e,Cacng2,Cd14,Scarb2,Cd44,Cd9,Cttn,Dab2,Dbnl,Dnm1,Dnm2,Epn1,Fcer1g,Fcgr1,Fcgr2b,Gfap,Slc6a9,Gria1,Gria2,Grm1,Grn,Hspg2,Htr1b,Ighg2b,Ighg1,Inppl1,Itgam,Itgb1,Itgb2,Kcnj10,Kcnj4,Ldlr,Lipa,Anxa1,Lyst,Mrc1,Myh9,Myo1c,Myo6,Napb,Npc1,P2rx7,Pecam1,Pip5k1c,Prkcd,Pld2,Ppt1,Psen1,Rbp4,Sh3gl2,Sh3gl1,Slc12a2,Slc1a3,Slc…	152/681
5_Member	GO Biological Processes	GO:0006897	endocytosis	-24.3281	-21.0217	11303,11352,11629,11745,11772,11777,11778,11816,11838,12300,12475,12492,12505,12527,13043,13132,13169,13429,13430,13854,14127,14129,14130,14799,14800,14824,15530,15551,16016,16017,16332,16409,16412,16414,16835,16889,16952,17101,17533,17886,17913,17920,17957,18145,18439,18613,18717,18806,19063,20404,20405,20616,20617,20907,20977,20979,21817,21825,22042,22241,22318,22324,22350,23790,23969,26362,270…	Abca1,Abl2,Aif1,Anxa3,Ap2a2,Ap3s1,Ap3s2,Apoe,Arc,Cacng2,Cd14,Scarb2,Cd44,Cd9,Cttn,Dab2,Dbnl,Dnm1,Dnm2,Epn1,Fcer1g,Fcgr1,Fcgr2b,Gria1,Gria2,Grn,Hspg2,Htr1b,Ighg2b,Ighg1,Inppl1,Itgam,Itgb1,Itgb2,Ldlr,Lipa,Anxa1,Lyst,Mrc1,Myh9,Myo1c,Myo6,Napb,Npc1,P2rx7,Pecam1,Pip5k1c,Pld2,Ppt1,Sh3gl2,Sh3gl1,Snap91,Snca,Stx1a,Syp,Syt1,Tgm2,Thbs1,Tfrc,Ulk1,Vamp2,Vav1,Ezr,Coro1c,Pacsin1,Axl,Micall1,Rabgap1l,Cacng3,Syt…	119/499
5_Member	GO Biological Processes	GO:0006898	receptor-mediated endocytosis	-11.778	-9.57041	11816,12300,12475,12492,12505,12527,13043,13132,13430,14127,14129,14130,14799,14800,15530,15551,16409,16412,16414,16835,17533,17920,18806,19063,20616,20617,22042,22241,22350,27008,54376,66141,71770,72685,74015,74325,74342,81905,106572,216869,245537,271457	Apoe,Cacng2,Cd14,Scarb2,Cd44,Cd9,Cttn,Dab2,Dnm2,Fcer1g,Fcgr1,Fcgr2b,Gria1,Gria2,Hspg2,Htr1b,Itgam,Itgb1,Itgb2,Ldlr,Mrc1,Myo6,Pld2,Ppt1,Snap91,Snca,Tfrc,Ulk1,Ezr,Micall1,Cacng3,Ifitm3,Ap2b1,Dnajc6,Fcho1,Cltb,Lrrtm1,Cacng8,Rab31,Arrb2,Nlgn3,Rab5a	42/165
5_Member	GO Biological Processes	GO:0031623	receptor internalization	-7.54471	-5.55586	11772,12300,12527,13429,13430,14127,14799,14800,15551,16412,16414,17920,18806,20617,22042,22241,22350,54376,71770,74342,81905,106572,216869,271457	Ap2a2,Cacng2,Cd9,Dnm1,Dnm2,Fcer1g,Gria1,Gria2,Htr1b,Itgb1,Itgb2,Myo6,Pld2,Snca,Tfrc,Ulk1,Ezr,Cacng3,Ap2b1,Lrrtm1,Cacng8,Rab31,Arrb2,Rab5a	24/79
6_Summary	GO Biological Processes	GO:0031175	neuron projection development	-25.1858	-21.7702	11352,11491,11816,11941,12043,12305,12322,12368,12386,12488,12505,12552,12647,12759,12803,12978,13043,13131,13138,13169,13176,13361,13430,13641,13642,13643,13649,13838,13839,13840,13841,13844,14130,14182,14432,14580,14609,14763,14790,15530,16202,16412,16467,16573,16765,16779,16897,17096,17756,17758,17762,17828,17920,17974,18000,18164,18186,18213,18223,18488,18605,18717,18806,18844,19055,19229,192…	Abl2,Adam17,Apoe,Atp2b2,Bcl2,Ddr1,Camk2a,Casp6,Ctnna2,Cd2ap,Cd44,Cdh11,Chat,Clu,Cntf,Csf1r,Cttn,Dab1,Dag1,Dbnl,Dcc,Dhfr,Dnm2,Efnb1,Efnb2,Efnb3,Egfr,Epha4,Epha5,Epha6,Epha7,Ephb2,Fcgr2b,Fgfr1,Gap43,Gfap,Gja1,Gpr37,Grcc10,Hspg2,Ilk,Itgb1,Atcay,Kif5b,Stmn1,Lamb2,Llgl1,Lyn,Map2,Map4,Mapt,Bloc1s5,Myo6,Nck2,Septin2,Nptx1,Nrp1,Ntrk3,Numbl,Cntn3,Enpp1,Pip5k1c,Pld2,Plxna1,Ppp3ca,Ptk2b,Ptprf,Rab3a,Robo1,S1…	215/-
6_Member	GO Biological Processes	GO:0031175	neuron projection development	-25.1858	-21.7702	11352,11491,11816,11941,12043,12305,12322,12368,12386,12488,12505,12552,12647,12759,12803,12978,13043,13131,13138,13169,13176,13361,13430,13641,13642,13643,13649,13838,13839,13840,13841,13844,14130,14182,14432,14580,14609,14763,14790,15530,16202,16412,16467,16573,16765,16779,16897,17096,17756,17758,17762,17828,17920,17974,18000,18164,18186,18213,18223,18488,18605,18717,18806,18844,19055,19229,192…	Abl2,Adam17,Apoe,Atp2b2,Bcl2,Ddr1,Camk2a,Casp6,Ctnna2,Cd2ap,Cd44,Cdh11,Chat,Clu,Cntf,Csf1r,Cttn,Dab1,Dag1,Dbnl,Dcc,Dhfr,Dnm2,Efnb1,Efnb2,Efnb3,Egfr,Epha4,Epha5,Epha6,Epha7,Ephb2,Fcgr2b,Fgfr1,Gap43,Gfap,Gja1,Gpr37,Grcc10,Hspg2,Ilk,Itgb1,Atcay,Kif5b,Stmn1,Lamb2,Llgl1,Lyn,Map2,Map4,Mapt,Bloc1s5,Myo6,Nck2,Septin2,Nptx1,Nrp1,Ntrk3,Numbl,Cntn3,Enpp1,Pip5k1c,Pld2,Plxna1,Ppp3ca,Ptk2b,Ptprf,Rab3a,Robo1,S1…	161/783
6_Member	GO Biological Processes	GO:0000902	cell morphogenesis	-16.0648	-13.1802	11352,11491,11941,12043,12305,12322,12323,12345,12386,12488,12552,12564,12565,12759,12978,13043,13131,13132,13138,13169,13176,13430,13641,13642,13643,13649,13828,13838,13839,13840,13841,13844,14432,14609,14790,15170,15211,15530,16202,16412,16573,16765,16779,16889,16897,17756,17762,17886,17925,18164,18186,18213,18223,18439,18605,18613,18717,18844,19055,19171,19339,19876,20203,20404,20512,20562,205…	Abl2,Adam17,Atp2b2,Bcl2,Ddr1,Camk2a,Camk2b,Capzb,Ctnna2,Cd2ap,Cdh11,Cdh8,Cdh9,Clu,Csf1r,Cttn,Dab1,Dab2,Dag1,Dbnl,Dcc,Dnm2,Efnb1,Efnb2,Efnb3,Egfr,Epb42,Epha4,Epha5,Epha6,Epha7,Ephb2,Gap43,Gja1,Grcc10,Ptpn6,Hexa,Hspg2,Ilk,Itgb1,Kif5b,Stmn1,Lamb2,Lipa,Llgl1,Map2,Mapt,Myh9,Myo9b,Nptx1,Nrp1,Ntrk3,Numbl,P2rx7,Enpp1,Pecam1,Pip5k1c,Plxna1,Ppp3ca,Psmb10,Rab3a,Robo1,S100b,Sh3gl2,Slc1a3,Slit1,Slit2,Slit3,Sn…	139/779
6_Member	GO Biological Processes	GO:0120039	plasma membrane bounded cell projection morphogenesis	-14.3605	-11.6909	11352,11491,12043,12305,12322,12386,12488,12552,12759,12978,13043,13131,13138,13169,13176,13430,13641,13642,13643,13649,13838,13839,13840,13841,13844,14432,14609,14790,15530,16202,16412,16573,16765,16779,16897,17756,17762,17925,18164,18186,18213,18223,18717,18844,19055,19339,19876,20203,20404,20562,20563,20564,20616,21648,21828,22239,22241,22253,22323,22330,23969,29875,50932,65079,67453,68193,684…	Abl2,Adam17,Bcl2,Ddr1,Camk2a,Ctnna2,Cd2ap,Cdh11,Clu,Csf1r,Cttn,Dab1,Dag1,Dbnl,Dcc,Dnm2,Efnb1,Efnb2,Efnb3,Egfr,Epha4,Epha5,Epha6,Epha7,Ephb2,Gap43,Gja1,Grcc10,Hspg2,Ilk,Itgb1,Kif5b,Stmn1,Lamb2,Llgl1,Map2,Mapt,Myo9b,Nptx1,Nrp1,Ntrk3,Numbl,Pip5k1c,Plxna1,Ppp3ca,Rab3a,Robo1,S100b,Sh3gl2,Slit1,Slit2,Slit3,Snap91,Dynlt1b,Thbs4,Ugt8a,Ulk1,Unc5c,Vasp,Vcl,Pacsin1,Iqgap1,Mink1,Rtn4r,Slc25a46,Rpl24,Nrn1,Tme…	105/547
6_Member	GO Biological Processes	GO:0048858	cell projection morphogenesis	-14.3399	-11.6812	11352,11491,12043,12305,12322,12323,12386,12488,12552,12759,12978,13043,13131,13138,13169,13176,13430,13641,13642,13643,13649,13838,13839,13840,13841,13844,14432,14609,14790,15530,16202,16412,16573,16765,16779,16897,17756,17762,17925,18164,18186,18213,18223,18717,18844,19055,19339,19876,20203,20404,20562,20563,20564,20616,21648,21828,22239,22241,22253,22323,22330,23969,29875,50932,65079,67453,681…	Abl2,Adam17,Bcl2,Ddr1,Camk2a,Camk2b,Ctnna2,Cd2ap,Cdh11,Clu,Csf1r,Cttn,Dab1,Dag1,Dbnl,Dcc,Dnm2,Efnb1,Efnb2,Efnb3,Egfr,Epha4,Epha5,Epha6,Epha7,Ephb2,Gap43,Gja1,Grcc10,Hspg2,Ilk,Itgb1,Kif5b,Stmn1,Lamb2,Llgl1,Map2,Mapt,Myo9b,Nptx1,Nrp1,Ntrk3,Numbl,Pip5k1c,Plxna1,Ppp3ca,Rab3a,Robo1,S100b,Sh3gl2,Slit1,Slit2,Slit3,Snap91,Dynlt1b,Thbs4,Ugt8a,Ulk1,Unc5c,Vasp,Vcl,Pacsin1,Iqgap1,Mink1,Rtn4r,Slc25a46,Rpl24,N…	106/555
6_Member	GO Biological Processes	GO:0048812	neuron projection morphogenesis	-13.8548	-11.2662	11352,11491,12043,12305,12322,12386,12488,12552,12759,12978,13043,13131,13138,13169,13176,13430,13641,13642,13643,13649,13838,13839,13840,13841,13844,14432,14609,14790,15530,16202,16412,16573,16765,16779,16897,17756,17762,18164,18186,18213,18223,18717,18844,19055,19339,19876,20203,20404,20562,20563,20564,20616,21648,21828,22239,22241,22253,22323,22330,23969,29875,50932,65079,67453,68193,68404,719…	Abl2,Adam17,Bcl2,Ddr1,Camk2a,Ctnna2,Cd2ap,Cdh11,Clu,Csf1r,Cttn,Dab1,Dag1,Dbnl,Dcc,Dnm2,Efnb1,Efnb2,Efnb3,Egfr,Epha4,Epha5,Epha6,Epha7,Ephb2,Gap43,Gja1,Grcc10,Hspg2,Ilk,Itgb1,Kif5b,Stmn1,Lamb2,Llgl1,Map2,Mapt,Nptx1,Nrp1,Ntrk3,Numbl,Pip5k1c,Plxna1,Ppp3ca,Rab3a,Robo1,S100b,Sh3gl2,Slit1,Slit2,Slit3,Snap91,Dynlt1b,Thbs4,Ugt8a,Ulk1,Unc5c,Vasp,Vcl,Pacsin1,Iqgap1,Mink1,Rtn4r,Slc25a46,Rpl24,Nrn1,Tmem106b,…	103/541
6_Member	GO Biological Processes	GO:0032989	cellular anatomical entity morphogenesis	-13.0908	-10.5704	11352,11491,12043,12305,12322,12323,12386,12488,12527,12552,12759,12978,13007,13043,13131,13138,13169,13176,13430,13641,13642,13643,13649,13838,13839,13840,13841,13844,14432,14609,14733,14790,15530,16202,16412,16573,16691,16765,16779,16897,17756,17762,17925,18164,18186,18213,18223,18717,18844,19055,19339,19876,20203,20404,20562,20563,20564,20616,21648,21828,22239,22241,22253,22323,22330,23969,240…	Abl2,Adam17,Bcl2,Ddr1,Camk2a,Camk2b,Ctnna2,Cd2ap,Cd9,Cdh11,Clu,Csf1r,Csrp1,Cttn,Dab1,Dag1,Dbnl,Dcc,Dnm2,Efnb1,Efnb2,Efnb3,Egfr,Epha4,Epha5,Epha6,Epha7,Ephb2,Gap43,Gja1,Gpc1,Grcc10,Hspg2,Ilk,Itgb1,Kif5b,Krt8,Stmn1,Lamb2,Llgl1,Map2,Mapt,Myo9b,Nptx1,Nrp1,Ntrk3,Numbl,Pip5k1c,Plxna1,Ppp3ca,Rab3a,Robo1,S100b,Sh3gl2,Slit1,Slit2,Slit3,Snap91,Dynlt1b,Thbs4,Ugt8a,Ulk1,Unc5c,Vasp,Vcl,Pacsin1,Tlr2,Iqgap1,Min…	117/666
6_Member	KEGG Pathway	mmu04360	Axon guidance - Mus musculus (house mouse)	-10.7764	-8.50246	12322,12323,13176,13641,13642,13643,13838,13839,13840,13841,13844,16202,16412,16653,17974,18186,18707,18844,19055,19056,19058,19354,19876,20130,20562,20563,20564,22063,22068,22253,50780,70584,93742,98932,107448,107449,140570,140571,170758,171171,214968,235611,243743,245857,268902,270190	Camk2a,Camk2b,Dcc,Efnb1,Efnb2,Efnb3,Epha4,Epha5,Epha6,Epha7,Ephb2,Ilk,Itgb1,Kras,Nck2,Nrp1,Pik3cd,Plxna1,Ppp3ca,Ppp3cb,Ppp3r1,Rac2,Robo1,Rras,Slit1,Slit2,Slit3,Trpc1,Trpc6,Unc5c,Rgs3,Pak4,Pard3,Myl9,Unc5a,Unc5b,Plxnb2,Plxnb3,Rac3,Ntng2,Sema6d,Plxnb1,Plxna4,Ssh3,Robo2,Ephb1	46/181
6_Member	GO Biological Processes	GO:0061564	axon development	-10.193	-7.98536	11491,12043,12305,12368,12386,12488,12552,12803,12978,13131,13138,13176,13361,13641,13642,13643,13838,13839,13840,13841,13844,14432,14790,15530,16412,16573,16765,16779,16897,17756,17762,18164,18186,18213,18223,18605,18717,19339,19876,20562,20563,20564,20616,21648,21923,22241,22253,22323,22330,65079,67453,68193,68404,70747,72832,75409,76260,77018,83431,93840,107448,107449,108073,108655,170758,1711…	Adam17,Bcl2,Ddr1,Casp6,Ctnna2,Cd2ap,Cdh11,Cntf,Csf1r,Dab1,Dag1,Dcc,Dhfr,Efnb1,Efnb2,Efnb3,Epha4,Epha5,Epha6,Epha7,Ephb2,Gap43,Grcc10,Hspg2,Itgb1,Kif5b,Stmn1,Lamb2,Llgl1,Map2,Mapt,Nptx1,Nrp1,Ntrk3,Numbl,Enpp1,Pip5k1c,Rab3a,Robo1,Slit1,Slit2,Slit3,Snap91,Dynlt1b,Tnc,Ulk1,Unc5c,Vasp,Vcl,Rtn4r,Slc25a46,Rpl24,Nrn1,Tspan2,Crtac1,Slitrk5,Ttc8,Col25a1,Ndel1,Vangl2,Unc5a,Unc5b,Grm7,Foxp1,Rac3,Ntng2,Spg11,…	82/449
6_Member	GO Biological Processes	GO:0048667	cell morphogenesis involved in neuron differentiation	-9.6526	-7.4601	11352,11491,11941,12043,12322,12386,12488,12552,12978,13131,13138,13176,13641,13642,13643,13838,13839,13840,13841,13844,14432,14790,15211,15530,16412,16573,16765,16779,16897,17756,17762,18164,18186,18213,18223,18717,19055,19339,19876,20512,20562,20563,20564,20616,22241,22253,22323,22330,50932,65079,67453,68193,68404,71900,74053,75409,76260,77018,83431,93686,93840,97031,102502,107448,107449,108655…	Abl2,Adam17,Atp2b2,Bcl2,Camk2a,Ctnna2,Cd2ap,Cdh11,Csf1r,Dab1,Dag1,Dcc,Efnb1,Efnb2,Efnb3,Epha4,Epha5,Epha6,Epha7,Ephb2,Gap43,Grcc10,Hexa,Hspg2,Itgb1,Kif5b,Stmn1,Lamb2,Llgl1,Map2,Mapt,Nptx1,Nrp1,Ntrk3,Numbl,Pip5k1c,Ppp3ca,Rab3a,Robo1,Slc1a3,Slit1,Slit2,Slit3,Snap91,Ulk1,Unc5c,Vasp,Vcl,Mink1,Rtn4r,Slc25a46,Rpl24,Nrn1,Tmem106b,Grip1,Slitrk5,Ttc8,Col25a1,Ndel1,Rbfox2,Vangl2,Tprn,Pls1,Unc5a,Unc5b,Foxp1…	87/500
6_Member	GO Biological Processes	GO:0007409	axonogenesis	-8.5084	-6.42417	11491,12043,12386,12488,12552,12978,13131,13138,13176,13641,13642,13643,13838,13839,13840,13841,13844,14432,14790,15530,16412,16573,16765,16779,16897,17756,17762,18164,18186,18213,18223,18717,19339,19876,20562,20563,20564,20616,22241,22253,22323,22330,65079,67453,68193,68404,75409,76260,77018,83431,93840,107448,107449,108655,170758,171171,214585,214968,229715,229791,230316,231876,237847,240057,24…	Adam17,Bcl2,Ctnna2,Cd2ap,Cdh11,Csf1r,Dab1,Dag1,Dcc,Efnb1,Efnb2,Efnb3,Epha4,Epha5,Epha6,Epha7,Ephb2,Gap43,Grcc10,Hspg2,Itgb1,Kif5b,Stmn1,Lamb2,Llgl1,Map2,Mapt,Nptx1,Nrp1,Ntrk3,Numbl,Pip5k1c,Rab3a,Robo1,Slit1,Slit2,Slit3,Snap91,Ulk1,Unc5c,Vasp,Vcl,Rtn4r,Slc25a46,Rpl24,Nrn1,Slitrk5,Ttc8,Col25a1,Ndel1,Vangl2,Unc5a,Unc5b,Foxp1,Rac3,Ntng2,Spg11,Sema6d,Amigo1,Plppr4,Megf9,Lmtk2,Rtn4rl1,Syngap1,Plxna4,Sl…	71/397
6_Member	GO Biological Processes	GO:0097485	neuron projection guidance	-3.7459	-2.31193	11491,12978,13138,13176,13641,13642,13643,13838,13839,13840,13841,13844,14432,15530,16573,16779,18186,18844,19876,20562,20563,20564,22253,22323,65079,68193,76260,93840,107448,107449,108655,170758,214968,230316,231876,237847,243743,268902,270190	Adam17,Csf1r,Dag1,Dcc,Efnb1,Efnb2,Efnb3,Epha4,Epha5,Epha6,Epha7,Ephb2,Gap43,Hspg2,Kif5b,Lamb2,Nrp1,Plxna1,Robo1,Slit1,Slit2,Slit3,Unc5c,Vasp,Rtn4r,Rpl24,Ttc8,Vangl2,Unc5a,Unc5b,Foxp1,Rac3,Sema6d,Megf9,Lmtk2,Rtn4rl1,Plxna4,Robo2,Ephb1	39/247
6_Member	GO Biological Processes	GO:0007411	axon guidance	-3.47126	-2.10099	11491,12978,13138,13176,13641,13642,13643,13838,13839,13840,13841,13844,14432,15530,16573,16779,18186,19876,20562,20563,20564,22253,22323,65079,68193,76260,93840,107448,107449,108655,170758,214968,230316,231876,237847,243743,268902,270190	Adam17,Csf1r,Dag1,Dcc,Efnb1,Efnb2,Efnb3,Epha4,Epha5,Epha6,Epha7,Ephb2,Gap43,Hspg2,Kif5b,Lamb2,Nrp1,Robo1,Slit1,Slit2,Slit3,Unc5c,Vasp,Rtn4r,Rpl24,Ttc8,Vangl2,Unc5a,Unc5b,Foxp1,Rac3,Sema6d,Megf9,Lmtk2,Rtn4rl1,Plxna4,Robo2,Ephb1	38/246
7_Summary	GO Biological Processes	GO:0030029	actin filament-based process	-24.532	-21.1744	11352,11629,11840,11867,12043,12288,12293,12296,12332,12345,12488,12797,12891,13007,13043,13169,13430,13821,13822,16332,16412,16419,16456,16653,16691,16897,16952,17118,17880,17886,17913,17920,17925,17974,18826,19229,19317,19354,20404,20739,20928,21346,21872,21894,22004,22323,22350,23790,23969,29875,30785,30794,50768,50932,53318,54418,56193,56212,56376,57342,63873,65970,66713,67199,67399,67803,680…	Abl2,Aif1,Arf1,Arpc1b,Bcl2,Cacna1c,Cacna2d1,Cacnb2,Capg,Capzb,Cd2ap,Cnn1,Cpne6,Csrp1,Cttn,Dbnl,Dnm2,Epb41l1,Epb41l2,Inppl1,Itgb1,Itgb5,F11r,Kras,Krt8,Llgl1,Anxa1,Marcks,Myh11,Myh9,Myo1c,Myo6,Myo9b,Nck2,Lcp1,Ptk2b,Qki,Rac2,Sh3gl2,Spta1,Abcc9,Tagln2,Tjp1,Tln1,Tpm2,Vasp,Ezr,Coro1c,Pacsin1,Iqgap1,Cttnbp2,Pdlim4,Dlc1,Mink1,Pdlim3,Fmn2,Plek,Rhog,Pdlim5,Parva,Trpv4,Lima1,Actr2,Pfdn1,Pdlim7,Limd2,Arpc4,C…	165/-
7_Member	GO Biological Processes	GO:0030029	actin filament-based process	-24.532	-21.1744	11352,11629,11840,11867,12043,12288,12293,12296,12332,12345,12488,12797,12891,13007,13043,13169,13430,13821,13822,16332,16412,16419,16456,16653,16691,16897,16952,17118,17880,17886,17913,17920,17925,17974,18826,19229,19317,19354,20404,20739,20928,21346,21872,21894,22004,22323,22350,23790,23969,29875,30785,30794,50768,50932,53318,54418,56193,56212,56376,57342,63873,65970,66713,67199,67399,67803,680…	Abl2,Aif1,Arf1,Arpc1b,Bcl2,Cacna1c,Cacna2d1,Cacnb2,Capg,Capzb,Cd2ap,Cnn1,Cpne6,Csrp1,Cttn,Dbnl,Dnm2,Epb41l1,Epb41l2,Inppl1,Itgb1,Itgb5,F11r,Kras,Krt8,Llgl1,Anxa1,Marcks,Myh11,Myh9,Myo1c,Myo6,Myo9b,Nck2,Lcp1,Ptk2b,Qki,Rac2,Sh3gl2,Spta1,Abcc9,Tagln2,Tjp1,Tln1,Tpm2,Vasp,Ezr,Coro1c,Pacsin1,Iqgap1,Cttnbp2,Pdlim4,Dlc1,Mink1,Pdlim3,Fmn2,Plek,Rhog,Pdlim5,Parva,Trpv4,Lima1,Actr2,Pfdn1,Pdlim7,Limd2,Arpc4,C…	132/585
7_Member	GO Biological Processes	GO:0030036	actin cytoskeleton organization	-22.3776	-19.3474	11352,11629,11840,11867,12043,12332,12345,12488,12797,12891,13007,13043,13169,13430,13821,13822,16332,16412,16419,16456,16653,16691,16897,16952,17118,17880,17886,17913,17920,17974,18826,19229,19354,20404,20739,21346,21872,21894,22004,22323,22350,23790,23969,29875,30785,30794,50768,50932,53318,54418,56193,56212,56376,57342,63873,65970,66713,67199,67399,67803,68089,68743,68794,69538,69581,70497,714…	Abl2,Aif1,Arf1,Arpc1b,Bcl2,Capg,Capzb,Cd2ap,Cnn1,Cpne6,Csrp1,Cttn,Dbnl,Dnm2,Epb41l1,Epb41l2,Inppl1,Itgb1,Itgb5,F11r,Kras,Krt8,Llgl1,Anxa1,Marcks,Myh11,Myh9,Myo1c,Myo6,Nck2,Lcp1,Ptk2b,Rac2,Sh3gl2,Spta1,Tagln2,Tjp1,Tln1,Tpm2,Vasp,Ezr,Coro1c,Pacsin1,Iqgap1,Cttnbp2,Pdlim4,Dlc1,Mink1,Pdlim3,Fmn2,Plek,Rhog,Pdlim5,Parva,Trpv4,Lima1,Actr2,Pfdn1,Pdlim7,Limd2,Arpc4,Anln,Flnc,Antxr1,Rhou,Arhgap17,Ptk7,Myo1e…	120/531
7_Member	GO Biological Processes	GO:0007015	actin filament organization	-12.3575	-9.93561	11352,11629,11840,11867,12043,12332,12345,12488,12797,13430,16332,16419,17118,17886,17913,17920,17974,18826,19229,19354,21346,22004,22323,22350,23790,23969,29875,53318,54418,56212,63873,65970,66713,67803,68089,69581,70497,71602,71994,74103,74194,74569,77767,78885,101314,102502,108100,109880,114774,140580,170758,171580,192176,217124,227753,231830,232201,234683,234695,246710,326618,330319,338367	Abl2,Aif1,Arf1,Arpc1b,Bcl2,Capg,Capzb,Cd2ap,Cnn1,Dnm2,Inppl1,Itgb5,Marcks,Myh9,Myo1c,Myo6,Nck2,Lcp1,Ptk2b,Rac2,Tagln2,Tpm2,Vasp,Ezr,Coro1c,Pacsin1,Iqgap1,Pdlim3,Fmn2,Rhog,Trpv4,Lima1,Actr2,Limd2,Arpc4,Rhou,Arhgap17,Myo1e,Cnn3,Nebl,Rnd3,Ttc17,Ermn,Coro7,Brk1,Pls1,Baiap2,Braf,Pawr,Elmo1,Rac3,Mical1,Flna,Ppp1r9b,Gsn,Micall2,Arhgap25,Elmo3,Carmil2,Rhobtb2,Tpm4,Wipf3,Myo1d	63/274
7_Member	GO Biological Processes	GO:0097435	supramolecular fiber organization	-12.1132	-9.70379	11352,11595,11629,11840,11867,12010,12043,12122,12306,12332,12345,12406,12488,12797,13007,13010,13346,13430,13589,14230,14580,16202,16332,16412,16419,16691,16765,16801,17118,17758,17762,17772,17880,17886,17913,17920,17974,17997,18451,18826,19229,19354,20262,20617,21346,22004,22323,22350,22352,23790,23969,23991,29875,53318,54418,56212,63873,65970,66713,67203,67254,67803,67971,68089,68339,68794,695…	Abl2,Acan,Aif1,Arf1,Arpc1b,B2m,Bcl2,Bid,Anxa2,Capg,Capzb,Serpinh1,Cd2ap,Cnn1,Csrp1,Cst3,Des,Dnm2,Mapre1,Fkbp10,Gfap,Ilk,Inppl1,Itgb1,Itgb5,Krt8,Stmn1,Arhgef1,Marcks,Map4,Mapt,Mtm1,Myh11,Myh9,Myo1c,Myo6,Nck2,Nedd1,P4ha1,Lcp1,Ptk2b,Rac2,Stmn3,Snca,Tagln2,Tpm2,Vasp,Ezr,Vim,Coro1c,Pacsin1,Cib1,Iqgap1,Pdlim3,Fmn2,Rhog,Trpv4,Lima1,Actr2,Nde1,Bmerb1,Limd2,Tppp3,Arpc4,Ccdc88c,Flnc,Rhou,Arhgap17,Myo1e,Cnn…	104/583
8_Summary	GO Biological Processes	GO:0060627	regulation of vesicle-mediated transport	-24.2994	-20.8838	11806,11816,11838,12010,12217,12306,12475,12476,12488,12512,12759,12889,12890,13429,14127,14129,14130,14809,15444,16017,16409,16412,16414,16423,16510,16854,16859,17096,17698,17957,18000,18439,18717,18805,18806,18952,19055,19056,19058,19063,19128,19264,19339,19340,19354,19684,19894,20404,20405,20616,20617,20619,20907,20909,20911,20912,20964,20971,20979,21817,22317,22318,22350,22370,23969,24088,263…	Apoa1,Apoe,Arc,B2m,Bsn,Anxa2,Cd14,Cd151,Cd2ap,Cd63,Clu,Cplx1,Cplx2,Dnm1,Fcer1g,Fcgr1,Fcgr2b,Grik5,Hpca,Ighg1,Itgam,Itgb1,Itgb2,Cd47,Kcnh1,Lgals3,Lgals9,Lyn,Msn,Napb,Septin2,P2rx7,Pip5k1c,Pld1,Pld2,Septin4,Ppp3ca,Ppp3cb,Ppp3r1,Ppt1,Pros1,Ptprc,Rab3a,Rab3d,Rac2,Rdx,Rph3a,Sh3gl2,Sh3gl1,Snap91,Snca,Snap23,Stx1a,Stx4a,Stxbp2,Stxbp3,Syn1,Sdc4,Syt1,Tgm2,Vamp1,Vamp2,Ezr,Vtn,Pacsin1,Tlr2,Axl,Pclo,Scamp5,P…	98/-
8_Member	GO Biological Processes	GO:0060627	regulation of vesicle-mediated transport	-24.2994	-20.8838	11806,11816,11838,12010,12217,12306,12475,12476,12488,12512,12759,12889,12890,13429,14127,14129,14130,14809,15444,16017,16409,16412,16414,16423,16510,16854,16859,17096,17698,17957,18000,18439,18717,18805,18806,18952,19055,19056,19058,19063,19128,19264,19339,19340,19354,19684,19894,20404,20405,20616,20617,20619,20907,20909,20911,20912,20964,20971,20979,21817,22317,22318,22350,22370,23969,24088,263…	Apoa1,Apoe,Arc,B2m,Bsn,Anxa2,Cd14,Cd151,Cd2ap,Cd63,Clu,Cplx1,Cplx2,Dnm1,Fcer1g,Fcgr1,Fcgr2b,Grik5,Hpca,Ighg1,Itgam,Itgb1,Itgb2,Cd47,Kcnh1,Lgals3,Lgals9,Lyn,Msn,Napb,Septin2,P2rx7,Pip5k1c,Pld1,Pld2,Septin4,Ppp3ca,Ppp3cb,Ppp3r1,Ppt1,Pros1,Ptprc,Rab3a,Rab3d,Rac2,Rdx,Rph3a,Sh3gl2,Sh3gl1,Snap91,Snca,Snap23,Stx1a,Stx4a,Stxbp2,Stxbp3,Syn1,Sdc4,Syt1,Tgm2,Vamp1,Vamp2,Ezr,Vtn,Pacsin1,Tlr2,Axl,Pclo,Scamp5,P…	93/612
8_Member	GO Biological Processes	GO:0030100	regulation of endocytosis	-14.51	-12.0052	11806,11816,11838,12010,12306,12475,12476,12488,12512,12759,13429,14127,14129,14130,15444,16017,16412,16423,16854,17957,18717,18806,19055,19056,19058,19063,19128,19264,20404,20405,20616,20617,21817,22370,23969,24088,26362,56807,66824,68420,69727,72961,80708,83433,93742,94176,105722,105855,106572,140780,216724,218038,227541	Apoa1,Apoe,Arc,B2m,Anxa2,Cd14,Cd151,Cd2ap,Cd63,Clu,Dnm1,Fcer1g,Fcgr1,Fcgr2b,Hpca,Ighg1,Itgb1,Cd47,Lgals3,Napb,Pip5k1c,Pld2,Ppp3ca,Ppp3cb,Ppp3r1,Ppt1,Pros1,Ptprc,Sh3gl2,Sh3gl1,Snap91,Snca,Tgm2,Vtn,Pacsin1,Tlr2,Axl,Scamp5,Pycard,Ankrd13a,Usp46,Slc17a7,Pacsin3,Trem2,Pard3,Dock2,Ano6,Nckap1l,Rab31,Bmp2k,Rufy1,Amph,Camk1d	53/339
8_Member	GO Biological Processes	GO:0045807	positive regulation of endocytosis	-10.4821	-8.40868	11806,11816,12010,12306,12475,12476,12512,12759,13429,14127,14129,14130,16017,16412,16423,18806,19055,19063,19128,19264,20405,20616,20617,22370,26362,66824,83433,93742,94176,105722,105855,106572,218038,227541	Apoa1,Apoe,B2m,Anxa2,Cd14,Cd151,Cd63,Clu,Dnm1,Fcer1g,Fcgr1,Fcgr2b,Ighg1,Itgb1,Cd47,Pld2,Ppp3ca,Ppt1,Pros1,Ptprc,Sh3gl1,Snap91,Snca,Vtn,Axl,Pycard,Trem2,Pard3,Dock2,Ano6,Nckap1l,Rab31,Amph,Camk1d	34/201
8_Member	GO Biological Processes	GO:0050766	positive regulation of phagocytosis	-4.9106	-3.51671	11625,11806,12266,13430,14127,14129,14130,16016,16017,16423,17886,19128,19264,66824,83433,94176,105722,105855,106572,227541	Ahsg,Apoa1,C3,Dnm2,Fcer1g,Fcgr1,Fcgr2b,Ighg2b,Ighg1,Cd47,Myh9,Pros1,Ptprc,Pycard,Trem2,Dock2,Ano6,Nckap1l,Rab31,Camk1d	20/91
8_Member	GO Biological Processes	GO:0050764	regulation of phagocytosis	-4.37182	-3.08008	11806,14127,14129,14130,16017,16423,19128,19264,21817,24088,66824,83433,94176,105722,105855,106572,227541	Apoa1,Fcer1g,Fcgr1,Fcgr2b,Ighg1,Cd47,Pros1,Ptprc,Tgm2,Tlr2,Pycard,Trem2,Dock2,Ano6,Nckap1l,Rab31,Camk1d	17/123
9_Summary	GO Biological Processes	GO:0050804	modulation of chemical synaptic transmission	-23.7216	-20.461	11421,11606,11784,11816,11838,11840,11941,12290,12297,12298,12300,12307,12322,12323,12349,12488,12494,12552,12647,12889,12890,13051,13138,13167,13176,13429,13643,13649,13838,13841,13844,14130,14299,14580,14664,14799,14800,14802,14806,14809,14811,14816,14823,15551,16412,16504,16510,16513,16573,16653,17762,17920,18168,18191,18439,18530,18585,18605,18754,18815,19055,19058,19141,19164,19229,19280,193…	Ace,Agt,Apba2,Apoe,Arc,Arf1,Atp2b2,Cacna1e,Cacnb3,Cacnb4,Cacng2,Calb1,Camk2a,Camk2b,Car2,Cd2ap,Cd38,Cdh11,Chat,Cplx1,Cplx2,Cx3cr1,Dag1,Dbi,Dcc,Dnm1,Efnb3,Egfr,Epha4,Epha7,Ephb2,Fcgr2b,Ncs1,Gfap,Slc6a9,Gria1,Gria2,Gria4,Grik2,Grik5,Grin2a,Grm1,Grm8,Htr1b,Itgb1,Kcnc3,Kcnh1,Kcnj10,Kif5b,Kras,Mapt,Myo6,Npy5r,Nrxn3,P2rx7,Pcdh8,Pde9a,Enpp1,Prkce,Plg,Ppp3ca,Ppp3r1,Lgmn,Psen1,Ptk2b,Ptprs,Rab3a,S100b,Sh3g…	152/-
9_Member	GO Biological Processes	GO:0050804	modulation of chemical synaptic transmission	-23.7216	-20.461	11421,11606,11784,11816,11838,11840,11941,12290,12297,12298,12300,12307,12322,12323,12349,12488,12494,12552,12647,12889,12890,13051,13138,13167,13176,13429,13643,13649,13838,13841,13844,14130,14299,14580,14664,14799,14800,14802,14806,14809,14811,14816,14823,15551,16412,16504,16510,16513,16573,16653,17762,17920,18168,18191,18439,18530,18585,18605,18754,18815,19055,19058,19141,19164,19229,19280,193…	Ace,Agt,Apba2,Apoe,Arc,Arf1,Atp2b2,Cacna1e,Cacnb3,Cacnb4,Cacng2,Calb1,Camk2a,Camk2b,Car2,Cd2ap,Cd38,Cdh11,Chat,Cplx1,Cplx2,Cx3cr1,Dag1,Dbi,Dcc,Dnm1,Efnb3,Egfr,Epha4,Epha7,Ephb2,Fcgr2b,Ncs1,Gfap,Slc6a9,Gria1,Gria2,Gria4,Grik2,Grik5,Grin2a,Grm1,Grm8,Htr1b,Itgb1,Kcnc3,Kcnh1,Kcnj10,Kif5b,Kras,Mapt,Myo6,Npy5r,Nrxn3,P2rx7,Pcdh8,Pde9a,Enpp1,Prkce,Plg,Ppp3ca,Ppp3r1,Lgmn,Psen1,Ptk2b,Ptprs,Rab3a,S100b,Sh3g…	152/740
9_Member	GO Biological Processes	GO:0099177	regulation of trans-synaptic signaling	-23.6589	-20.4396	11421,11606,11784,11816,11838,11840,11941,12290,12297,12298,12300,12307,12322,12323,12349,12488,12494,12552,12647,12889,12890,13051,13138,13167,13176,13429,13643,13649,13838,13841,13844,14130,14299,14580,14664,14799,14800,14802,14806,14809,14811,14816,14823,15551,16412,16504,16510,16513,16573,16653,17762,17920,18168,18191,18439,18530,18585,18605,18754,18815,19055,19058,19141,19164,19229,19280,193…	Ace,Agt,Apba2,Apoe,Arc,Arf1,Atp2b2,Cacna1e,Cacnb3,Cacnb4,Cacng2,Calb1,Camk2a,Camk2b,Car2,Cd2ap,Cd38,Cdh11,Chat,Cplx1,Cplx2,Cx3cr1,Dag1,Dbi,Dcc,Dnm1,Efnb3,Egfr,Epha4,Epha7,Ephb2,Fcgr2b,Ncs1,Gfap,Slc6a9,Gria1,Gria2,Gria4,Grik2,Grik5,Grin2a,Grm1,Grm8,Htr1b,Itgb1,Kcnc3,Kcnh1,Kcnj10,Kif5b,Kras,Mapt,Myo6,Npy5r,Nrxn3,P2rx7,Pcdh8,Pde9a,Enpp1,Prkce,Plg,Ppp3ca,Ppp3r1,Lgmn,Psen1,Ptk2b,Ptprs,Rab3a,S100b,Sh3g…	152/741
9_Member	GO Biological Processes	GO:0048167	regulation of synaptic plasticity	-11.7695	-9.42258	11421,11606,11816,11838,11840,11941,12307,12322,12323,12488,12494,12890,13051,13138,13167,13838,13844,14130,14580,14799,14806,14811,16513,16653,17762,17920,18585,18605,19141,19164,19229,19339,20203,20617,20720,20909,20964,20972,20977,22318,26562,50997,54525,56876,57340,64011,72555,74053,74342,76089,76787,104027,107831,108068,108071,108100,109880,110862,110891,116837,116838,171180,207683,214585,22…	Ace,Agt,Apoe,Arc,Arf1,Atp2b2,Calb1,Camk2a,Camk2b,Cd2ap,Cd38,Cplx2,Cx3cr1,Dag1,Dbi,Epha4,Ephb2,Fcgr2b,Gfap,Gria1,Grik2,Grin2a,Kcnj10,Kras,Mapt,Myo6,Pde9a,Enpp1,Lgmn,Psen1,Ptk2b,Rab3a,S100b,Snca,Serpine2,Stx4a,Syn1,Syngr1,Syp,Vamp2,Ncdn,Mpp2,Syt7,Nsmf,Jph3,Nrgn,Shisa9,Grip1,Lrrtm1,Rapgef2,Ppfia3,Synpo,Adgrb1,Grm2,Grm5,Baiap2,Braf,Kcnq3,Slc8a2,Rims1,Rims2,Syt12,Igsf11,Spg11,Itpka,Ythdf1,Shisa7,Erc2,…	79/397
9_Member	GO Biological Processes	GO:0050806	positive regulation of synaptic transmission	-4.52273	-3.19805	12300,12349,13167,13643,13649,13844,14299,14580,14799,14800,14802,14806,16573,18605,18754,19141,19164,19229,20203,20512,20617,20720,20907,20909,20979,22318,50997,54376,71709,74342,81905,109880,110891,116837,116838,171180,207683,216869,232813,241263,241770,245537,260297,382018,382056,432530	Cacng2,Car2,Dbi,Efnb3,Egfr,Ephb2,Ncs1,Gfap,Gria1,Gria2,Gria4,Grik2,Kif5b,Enpp1,Prkce,Lgmn,Psen1,Ptk2b,S100b,Slc1a3,Snca,Serpine2,Stx1a,Stx4a,Syt1,Vamp2,Mpp2,Cacng3,Syde1,Lrrtm1,Cacng8,Braf,Slc8a2,Rims1,Rims2,Syt12,Igsf11,Arrb2,Shisa7,Gpr158,Rims4,Nlgn3,Prrt1,Unc13a,Crtc1,Adcy1	46/325
10_Summary	Reactome Gene Sets	R-MMU-112316	Neuronal System	-22.6431	-19.5865	11669,11772,12294,12295,12296,12297,12298,12300,12322,12323,12889,13821,13822,14394,14395,14401,14402,14700,14701,14702,14799,14802,14809,14811,14816,16180,16485,16498,16502,16504,16510,16513,16531,17920,18191,18213,18797,19024,19268,19280,19339,20111,20168,20512,20907,20928,20964,20965,20979,22318,22342,26558,27204,52589,53623,54376,54393,55984,55991,65106,67760,70530,71770,72961,74053,74342,754…	Aldh2,Ap2a2,Cacna2d3,Cacnb1,Cacnb2,Cacnb3,Cacnb4,Cacng2,Camk2a,Camk2b,Cplx1,Epb41l1,Epb41l2,Gabra1,Gabra2,Gabrb2,Gabrb3,Gng10,Gng12,Gng2,Gria1,Gria4,Grik5,Grin2a,Grm1,Il1rap,Kcna1,Kcnab2,Kcnc1,Kcnc3,Kcnh1,Kcnj10,Kcnma1,Myo6,Nrxn3,Ntrk3,Plcb3,Ppfibp2,Ptprf,Ptprs,Rab3a,Rps6ka1,Rtn3,Slc1a3,Stx1a,Abcc9,Syn1,Syn2,Syt1,Vamp2,Lin7b,Homer3,Syn3,Ncald,Gria3,Cacng3,Gabbr1,Camkk1,Panx1,Arl6ip5,Slc38a2,Lrfn2…	99/-
10_Member	Reactome Gene Sets	R-MMU-112316	Neuronal System	-22.6431	-19.5865	11669,11772,12294,12295,12296,12297,12298,12300,12322,12323,12889,13821,13822,14394,14395,14401,14402,14700,14701,14702,14799,14802,14809,14811,14816,16180,16485,16498,16502,16504,16510,16513,16531,17920,18191,18213,18797,19024,19268,19280,19339,20111,20168,20512,20907,20928,20964,20965,20979,22318,22342,26558,27204,52589,53623,54376,54393,55984,55991,65106,67760,70530,71770,72961,74053,74342,754…	Aldh2,Ap2a2,Cacna2d3,Cacnb1,Cacnb2,Cacnb3,Cacnb4,Cacng2,Camk2a,Camk2b,Cplx1,Epb41l1,Epb41l2,Gabra1,Gabra2,Gabrb2,Gabrb3,Gng10,Gng12,Gng2,Gria1,Gria4,Grik5,Grin2a,Grm1,Il1rap,Kcna1,Kcnab2,Kcnc1,Kcnc3,Kcnh1,Kcnj10,Kcnma1,Myo6,Nrxn3,Ntrk3,Plcb3,Ppfibp2,Ptprf,Ptprs,Rab3a,Rps6ka1,Rtn3,Slc1a3,Stx1a,Abcc9,Syn1,Syn2,Syt1,Vamp2,Lin7b,Homer3,Syn3,Ncald,Gria3,Cacng3,Gabbr1,Camkk1,Panx1,Arl6ip5,Slc38a2,Lrfn2…	88/319
10_Member	Reactome Gene Sets	R-MMU-112315	Transmission across Chemical Synapses	-12.6047	-10.1569	11669,11772,12294,12295,12296,12297,12298,12300,12322,12323,12889,13821,14394,14395,14401,14402,14700,14701,14702,14799,14802,14809,14811,16513,17920,18797,19339,20111,20512,20907,20964,20965,20979,22318,22342,27204,52589,53623,54376,54393,55984,65106,67760,71770,72961,74053,76787,110886,116837,216456,242425,432530	Aldh2,Ap2a2,Cacna2d3,Cacnb1,Cacnb2,Cacnb3,Cacnb4,Cacng2,Camk2a,Camk2b,Cplx1,Epb41l1,Gabra1,Gabra2,Gabrb2,Gabrb3,Gng10,Gng12,Gng2,Gria1,Gria4,Grik5,Grin2a,Kcnj10,Myo6,Plcb3,Rab3a,Rps6ka1,Slc1a3,Stx1a,Syn1,Syn2,Syt1,Vamp2,Lin7b,Syn3,Ncald,Gria3,Cacng3,Gabbr1,Camkk1,Arl6ip5,Slc38a2,Ap2b1,Slc17a7,Grip1,Ppfia3,Gabra5,Rims1,Gls2,Gabbr2,Adcy1	52/199
10_Member	WikiPathways	WP5298	Dravet syndrome Scn1a A1783V point mutation model	-10.768	-8.49858	12294,12295,12297,12298,12322,14394,14402,14580,14799,14802,14811,16513,18033,20501,20512,20525,20527,20912,53623,54393,72821,72961,76257,109731,235281,242425,244059	Cacna2d3,Cacnb1,Cacnb3,Cacnb4,Camk2a,Gabra1,Gabrb3,Gfap,Gria1,Gria4,Grin2a,Kcnj10,Nfkb1,Slc16a1,Slc1a3,Slc2a1,Slc2a3,Stxbp3,Gria3,Gabbr1,Scn2b,Slc17a7,Slc38a3,Maob,Scn3b,Gabbr2,Chd2	27/72
10_Member	Reactome Gene Sets	R-MMU-112314	Neurotransmitter receptors and postsynaptic signal transmission	-5.83964	-4.06926	11772,12300,12322,12323,13821,14394,14395,14401,14402,14700,14701,14702,14799,14802,14809,14811,16513,17920,18797,20111,52589,53623,54376,54393,55984,71770,74053,110886,242425,432530	Ap2a2,Cacng2,Camk2a,Camk2b,Epb41l1,Gabra1,Gabra2,Gabrb2,Gabrb3,Gng10,Gng12,Gng2,Gria1,Gria4,Grik5,Grin2a,Kcnj10,Myo6,Plcb3,Rps6ka1,Ncald,Gria3,Cacng3,Gabbr1,Camkk1,Ap2b1,Grip1,Gabra5,Gabbr2,Adcy1	30/136
11_Summary	GO Biological Processes	GO:0098609	cell-cell adhesion	-19.4524	-16.4927	11352,11808,11829,11899,11932,12043,12304,12385,12386,12488,12505,12552,12564,12565,12628,12737,13051,13131,13176,13649,14735,15170,15894,16180,16403,16404,16409,16411,16412,16414,16419,16423,16456,16852,16859,17470,17528,17698,17886,18133,18530,18613,18717,19164,19264,19268,19280,19354,19876,20201,20563,20912,21825,21828,21838,21872,21873,21894,22329,22330,23959,26570,54725,56079,56193,56741,573…	Abl2,Apoa4,Aqp4,Astn1,Atp1b2,Bcl2,Pdia4,Ctnna1,Ctnna2,Cd2ap,Cd44,Cdh11,Cdh8,Cdh9,Cfh,Cldn1,Cx3cr1,Dab1,Dcc,Egfr,Gpc4,Ptpn6,Icam1,Il1rap,Itga6,Itga7,Itgam,Itgax,Itgb1,Itgb2,Itgb5,Cd47,F11r,Lgals1,Lgals9,Cd200,Mpz,Msn,Myh9,Ccn3,Pcdh8,Pecam1,Pip5k1c,Psen1,Ptprc,Ptprf,Ptprs,Rac2,Robo1,S100a8,Slit2,Stxbp3,Thbs1,Thbs4,Thy1,Tjp1,Tjp2,Tln1,Vcam1,Vcl,Nt5e,Slc7a11,Cadm1,Astn2,Plek,Igdcc4,Parva,Tnip1,Jam2,M…	104/-
11_Member	GO Biological Processes	GO:0098609	cell-cell adhesion	-19.4524	-16.4927	11352,11808,11829,11899,11932,12043,12304,12385,12386,12488,12505,12552,12564,12565,12628,12737,13051,13131,13176,13649,14735,15170,15894,16180,16403,16404,16409,16411,16412,16414,16419,16423,16456,16852,16859,17470,17528,17698,17886,18133,18530,18613,18717,19164,19264,19268,19280,19354,19876,20201,20563,20912,21825,21828,21838,21872,21873,21894,22329,22330,23959,26570,54725,56079,56193,56741,573…	Abl2,Apoa4,Aqp4,Astn1,Atp1b2,Bcl2,Pdia4,Ctnna1,Ctnna2,Cd2ap,Cd44,Cdh11,Cdh8,Cdh9,Cfh,Cldn1,Cx3cr1,Dab1,Dcc,Egfr,Gpc4,Ptpn6,Icam1,Il1rap,Itga6,Itga7,Itgam,Itgax,Itgb1,Itgb2,Itgb5,Cd47,F11r,Lgals1,Lgals9,Cd200,Mpz,Msn,Myh9,Ccn3,Pcdh8,Pecam1,Pip5k1c,Psen1,Ptprc,Ptprf,Ptprs,Rac2,Robo1,S100a8,Slit2,Stxbp3,Thbs1,Thbs4,Thy1,Tjp1,Tjp2,Tln1,Vcam1,Vcl,Nt5e,Slc7a11,Cadm1,Astn2,Plek,Igdcc4,Parva,Tnip1,Jam2,M…	104/460
12_Summary	GO Biological Processes	GO:0022604	regulation of cell morphogenesis	-17.157	-14.2387	11838,12323,12345,12505,12891,12978,13047,13144,13169,13822,13828,13838,13844,14061,14268,14674,14745,15212,15894,16019,16202,16404,16456,16952,17118,17698,17886,18223,18606,18844,19229,19268,19303,19684,20196,20203,20692,20739,20979,22350,23790,29806,50768,56212,56699,57342,57912,66713,69581,69710,71751,71960,72729,74053,75788,77767,104445,108100,116837,116838,140570,140571,170758,171171,217340,…	Arc,Camk2b,Capzb,Cd44,Cpne6,Csf1r,Cux1,Dapk3,Dbnl,Epb41l2,Epb42,Epha4,Ephb2,F2,Fn1,Gna13,Lpar1,Hexb,Icam1,Ighm,Ilk,Itga7,F11r,Anxa1,Marcks,Msn,Myh9,Numbl,Enpp2,Plxna1,Ptk2b,Ptprf,Pxn,Rdx,S100a13,S100b,Sparc,Spta1,Syt1,Ezr,Coro1c,Limd1,Dlc1,Rhog,Cdc42ep4,Parva,Cdc42se1,Actr2,Rhou,Arap1,Map3k13,Myh14,Cdc42se2,Grip1,Smurf1,Ermn,Cdc42ep1,Baiap2,Rims1,Rims2,Plxnb2,Plxnb3,Rac3,Ntng2,Rnf157,Itpka,Plxnb1…	72/-
12_Member	GO Biological Processes	GO:0022604	regulation of cell morphogenesis	-17.157	-14.2387	11838,12323,12345,12505,12891,12978,13047,13144,13169,13822,13828,13838,13844,14061,14268,14674,14745,15212,15894,16019,16202,16404,16456,16952,17118,17698,17886,18223,18606,18844,19229,19268,19303,19684,20196,20203,20692,20739,20979,22350,23790,29806,50768,56212,56699,57342,57912,66713,69581,69710,71751,71960,72729,74053,75788,77767,104445,108100,116837,116838,140570,140571,170758,171171,217340,…	Arc,Camk2b,Capzb,Cd44,Cpne6,Csf1r,Cux1,Dapk3,Dbnl,Epb41l2,Epb42,Epha4,Ephb2,F2,Fn1,Gna13,Lpar1,Hexb,Icam1,Ighm,Ilk,Itga7,F11r,Anxa1,Marcks,Msn,Myh9,Numbl,Enpp2,Plxna1,Ptk2b,Ptprf,Pxn,Rdx,S100a13,S100b,Sparc,Spta1,Syt1,Ezr,Coro1c,Limd1,Dlc1,Rhog,Cdc42ep4,Parva,Cdc42se1,Actr2,Rhou,Arap1,Map3k13,Myh14,Cdc42se2,Grip1,Smurf1,Ermn,Cdc42ep1,Baiap2,Rims1,Rims2,Plxnb2,Plxnb3,Rac3,Ntng2,Rnf157,Itpka,Plxnb1…	72/276
12_Member	GO Biological Processes	GO:0008360	regulation of cell shape	-11.5972	-9.28095	12978,13144,13822,13828,14061,14268,14674,14745,15212,15894,16404,16456,16952,17698,17886,18844,19229,19303,19684,20196,20203,20739,22350,29806,50768,56212,56699,57342,57912,69581,69710,71960,72729,77767,104445,108100,140570,140571,170758,235611,243743	Csf1r,Dapk3,Epb41l2,Epb42,F2,Fn1,Gna13,Lpar1,Hexb,Icam1,Itga7,F11r,Anxa1,Msn,Myh9,Plxna1,Ptk2b,Pxn,Rdx,S100a13,S100b,Spta1,Ezr,Limd1,Dlc1,Rhog,Cdc42ep4,Parva,Cdc42se1,Rhou,Arap1,Myh14,Cdc42se2,Ermn,Cdc42ep1,Baiap2,Plxnb2,Plxnb3,Rac3,Plxnb1,Plxna4	41/142
13_Summary	Reactome Gene Sets	R-MMU-6798695	Neutrophil degranulation	-16.3335	-13.641	11487,11717,11758,11772,11975,11980,11984,12010,12306,12475,12505,12512,13010,13032,13033,13036,13040,13136,13830,14127,14130,14824,14972,15170,15212,15439,16411,16414,16423,18033,18600,18753,18950,19264,19339,19340,20195,20619,21648,24088,26364,26416,26949,27357,29875,52120,56212,64138,66681,66824,67689,67963,69146,69981,70568,70719,72042,72512,78388,94176,102595,105722,105855,106572,208795,2173…	Adam10,Ampd3,Prdx6,Ap2a2,Atp6v0a1,Atp8a1,Atp6v0c,B2m,Anxa2,Cd14,Cd44,Cd63,Cst3,Ctsc,Ctsd,Ctsh,Ctss,Cd55,Stom,Fcer1g,Fcgr2b,Grn,H2-K1,Ptpn6,Hexb,Hp,Itgax,Itgb2,Cd47,Nfkb1,Padi2,Prkcd,Pnp,Ptprc,Rab3a,Rab3d,S100a11,Snap23,Dynlt1b,Tlr2,Adgre5,Mapk14,Vat1,Gyg1,Iqgap1,Hgsnat,Rhog,Ctsz,Pgm2,Pycard,Aldh3b1,Npc2,Gsdmd,Tmem30a,Cpne3,Arhgap45,Cotl1,Sting1,Mvp,Dock2,Plekho2,Ano6,Nckap1l,Rab31,Tmem63a,Tmc6,Na…	71/-
13_Member	Reactome Gene Sets	R-MMU-6798695	Neutrophil degranulation	-16.3335	-13.641	11487,11717,11758,11772,11975,11980,11984,12010,12306,12475,12505,12512,13010,13032,13033,13036,13040,13136,13830,14127,14130,14824,14972,15170,15212,15439,16411,16414,16423,18033,18600,18753,18950,19264,19339,19340,20195,20619,21648,24088,26364,26416,26949,27357,29875,52120,56212,64138,66681,66824,67689,67963,69146,69981,70568,70719,72042,72512,78388,94176,102595,105722,105855,106572,208795,2173…	Adam10,Ampd3,Prdx6,Ap2a2,Atp6v0a1,Atp8a1,Atp6v0c,B2m,Anxa2,Cd14,Cd44,Cd63,Cst3,Ctsc,Ctsd,Ctsh,Ctss,Cd55,Stom,Fcer1g,Fcgr2b,Grn,H2-K1,Ptpn6,Hexb,Hp,Itgax,Itgb2,Cd47,Nfkb1,Padi2,Prkcd,Pnp,Ptprc,Rab3a,Rab3d,S100a11,Snap23,Dynlt1b,Tlr2,Adgre5,Mapk14,Vat1,Gyg1,Iqgap1,Hgsnat,Rhog,Ctsz,Pgm2,Pycard,Aldh3b1,Npc2,Gsdmd,Tmem30a,Cpne3,Arhgap45,Cotl1,Sting1,Mvp,Dock2,Plekho2,Ano6,Nckap1l,Rab31,Tmem63a,Tmc6,Na…	71/513
14_Summary	GO Biological Processes	GO:0034220	monoatomic ion transmembrane transport	-16.2908	-13.6099	11418,11931,11933,11941,11946,11957,11958,11975,11984,12018,12043,12288,12290,12293,12294,12295,12296,12297,12298,12300,12724,13483,13618,14226,14297,14394,14395,14401,14402,14403,14799,14800,14802,14806,14809,14977,16439,16485,16498,16502,16504,16510,16513,16520,16531,17706,18115,18439,18797,18799,19264,20273,20496,20512,20533,20928,22063,22068,22784,28080,28240,29876,53623,54376,54403,55991,563…	Asic2,Atp1b1,Atp1b3,Atp2b2,Atp5f1a,Atp5pf,Atp5me,Atp6v0a1,Atp6v0c,Bak1,Bcl2,Cacna1c,Cacna1e,Cacna2d1,Cacna2d3,Cacnb1,Cacnb2,Cacnb3,Cacnb4,Cacng2,Clcn2,Dpp6,Ednrb,Fkbp1b,Fxn,Gabra1,Gabra2,Gabrb2,Gabrb3,Gabrd,Gria1,Gria2,Gria4,Grik2,Grik5,Slc39a7,Itpr2,Kcna1,Kcnab2,Kcnc1,Kcnc3,Kcnh1,Kcnj10,Kcnj4,Kcnma1,ATP8,Nnt,P2rx7,Plcb3,Plcd1,Ptprc,Scn8a,Slc12a2,Slc1a3,Slc4a1,Abcc9,Trpc1,Trpc6,Slc30a3,Atp5po,Trp…	213/-
14_Member	GO Biological Processes	GO:0034220	monoatomic ion transmembrane transport	-16.2908	-13.6099	11418,11931,11933,11941,11946,11957,11958,11975,11984,12018,12043,12288,12290,12293,12294,12295,12296,12297,12298,12300,12724,13483,13618,14226,14297,14394,14395,14401,14402,14403,14799,14800,14802,14806,14809,14977,16439,16485,16498,16502,16504,16510,16513,16520,16531,17706,18115,18439,18797,18799,19264,20273,20496,20512,20533,20928,22063,22068,22784,28080,28240,29876,53623,54376,54403,55991,563…	Asic2,Atp1b1,Atp1b3,Atp2b2,Atp5f1a,Atp5pf,Atp5me,Atp6v0a1,Atp6v0c,Bak1,Bcl2,Cacna1c,Cacna1e,Cacna2d1,Cacna2d3,Cacnb1,Cacnb2,Cacnb3,Cacnb4,Cacng2,Clcn2,Dpp6,Ednrb,Fkbp1b,Fxn,Gabra1,Gabra2,Gabrb2,Gabrb3,Gabrd,Gria1,Gria2,Gria4,Grik2,Grik5,Slc39a7,Itpr2,Kcna1,Kcnab2,Kcnc1,Kcnc3,Kcnh1,Kcnj10,Kcnj4,Kcnma1,ATP8,Nnt,P2rx7,Plcb3,Plcd1,Ptprc,Scn8a,Slc12a2,Slc1a3,Slc4a1,Abcc9,Trpc1,Trpc6,Slc30a3,Atp5po,Trp…	115/669
14_Member	GO Biological Processes	GO:0098660	inorganic ion transmembrane transport	-13.4681	-10.9149	11418,11732,11931,11932,11933,11941,11946,11957,11958,11972,11973,11975,11984,12018,12043,12288,12290,12293,12294,12295,12296,12297,12298,12300,13483,13618,14226,14297,14394,14395,14401,14402,14403,14664,14811,14977,16439,16485,16502,16504,16510,16513,16520,16531,17706,17711,18115,18439,18797,18799,19264,20273,20496,20512,20515,20529,20533,20928,22063,22068,22784,27425,28080,28240,54376,54403,559…	Asic2,Ank,Atp1b1,Atp1b2,Atp1b3,Atp2b2,Atp5f1a,Atp5pf,Atp5me,Atp6v0d1,Atp6v1e1,Atp6v0a1,Atp6v0c,Bak1,Bcl2,Cacna1c,Cacna1e,Cacna2d1,Cacna2d3,Cacnb1,Cacnb2,Cacnb3,Cacnb4,Cacng2,Dpp6,Ednrb,Fkbp1b,Fxn,Gabra1,Gabra2,Gabrb2,Gabrb3,Gabrd,Slc6a9,Grin2a,Slc39a7,Itpr2,Kcna1,Kcnc1,Kcnc3,Kcnh1,Kcnj10,Kcnj4,Kcnma1,ATP8,CYTB,Nnt,P2rx7,Plcb3,Plcd1,Ptprc,Scn8a,Slc12a2,Slc1a3,Slc20a1,Slc31a1,Slc4a1,Abcc9,Trpc1,Trp…	108/587
14_Member	GO Biological Processes	GO:0006812	monoatomic cation transport	-12.2641	-9.8485	11418,11931,11932,11933,11941,11946,11957,11958,11972,11973,11975,11984,12010,12018,12043,12288,12290,12293,12294,12295,12296,12297,12298,12300,12322,12323,12870,13430,13483,13618,14226,14297,14319,14664,14811,14977,15458,16439,16485,16498,16502,16504,16510,16513,16520,16531,17706,17711,17751,18115,18439,18797,18799,19055,19264,19326,20273,20496,20512,20515,20529,20928,22042,22063,22068,22784,274…	Asic2,Atp1b1,Atp1b2,Atp1b3,Atp2b2,Atp5f1a,Atp5pf,Atp5me,Atp6v0d1,Atp6v1e1,Atp6v0a1,Atp6v0c,B2m,Bak1,Bcl2,Cacna1c,Cacna1e,Cacna2d1,Cacna2d3,Cacnb1,Cacnb2,Cacnb3,Cacnb4,Cacng2,Camk2a,Camk2b,Cp,Dnm2,Dpp6,Ednrb,Fkbp1b,Fxn,Fth1,Slc6a9,Grin2a,Slc39a7,Hpx,Itpr2,Kcna1,Kcnab2,Kcnc1,Kcnc3,Kcnh1,Kcnj10,Kcnj4,Kcnma1,ATP8,CYTB,Mt3,Nnt,P2rx7,Plcb3,Plcd1,Ppp3ca,Ptprc,Rab11b,Scn8a,Slc12a2,Slc1a3,Slc20a1,Slc31a1,…	121/717
14_Member	GO Biological Processes	GO:0098662	inorganic cation transmembrane transport	-11.9668	-9.58696	11418,11931,11932,11933,11941,11946,11957,11958,11972,11973,11975,11984,12018,12043,12288,12290,12293,12294,12295,12296,12297,12298,12300,13483,13618,14226,14297,14664,14811,14977,16439,16485,16502,16504,16510,16513,16520,16531,17706,17711,18115,18439,18797,18799,19264,20273,20496,20512,20529,20928,22063,22068,22784,27425,28080,28240,54376,54403,55991,56384,57423,63873,65973,66237,66658,67972,681…	Asic2,Atp1b1,Atp1b2,Atp1b3,Atp2b2,Atp5f1a,Atp5pf,Atp5me,Atp6v0d1,Atp6v1e1,Atp6v0a1,Atp6v0c,Bak1,Bcl2,Cacna1c,Cacna1e,Cacna2d1,Cacna2d3,Cacnb1,Cacnb2,Cacnb3,Cacnb4,Cacng2,Dpp6,Ednrb,Fkbp1b,Fxn,Slc6a9,Grin2a,Slc39a7,Itpr2,Kcna1,Kcnc1,Kcnc3,Kcnh1,Kcnj10,Kcnj4,Kcnma1,ATP8,CYTB,Nnt,P2rx7,Plcb3,Plcd1,Ptprc,Scn8a,Slc12a2,Slc1a3,Slc31a1,Abcc9,Trpc1,Trpc6,Slc30a3,Atp5mg,Atp5po,Trpm2,Cacng3,Slc4a4,Panx1,Le…	96/523
14_Member	GO Biological Processes	GO:0019725	cellular homeostasis	-11.9445	-9.70084	11606,11732,11758,11816,11829,11840,11931,11933,11941,11975,11984,12010,12018,12043,12288,12296,12298,12349,12870,14061,14226,14297,14299,14319,14325,14775,14806,14824,14977,15212,15368,15458,15894,16510,16531,17748,17750,17751,17772,18115,18439,18477,18605,18754,18799,18815,18854,19055,19063,19092,19164,19309,19326,20203,20496,20512,20533,20535,20536,20912,21817,22042,22063,22068,22329,22784,265…	Agt,Ank,Prdx6,Apoe,Aqp4,Arf1,Atp1b1,Atp1b3,Atp2b2,Atp6v0a1,Atp6v0c,B2m,Bak1,Bcl2,Cacna1c,Cacnb2,Cacnb4,Car2,Cp,F2,Fkbp1b,Fxn,Ncs1,Fth1,Ftl1,Gpx1,Grik2,Grn,Slc39a7,Hexb,Hmox1,Hpx,Icam1,Kcnh1,Kcnma1,Mt1,Mt2,Mt3,Mtm1,Nnt,P2rx7,Prdx1,Enpp1,Prkce,Plcd1,Plg,Pml,Ppp3ca,Ppt1,Prkg2,Psen1,Pygm,Rab11b,S100b,Slc12a2,Slc1a3,Slc4a1,Slc4a2,Slc4a3,Stxbp3,Tgm2,Tfrc,Trpc1,Trpc6,Vcam1,Slc30a3,Slc7a11,Bag3,Clic4,Min…	107/695
14_Member	GO Biological Processes	GO:0098655	monoatomic cation transmembrane transport	-11.8161	-9.45853	11418,11931,11932,11933,11941,11946,11957,11958,11972,11973,11975,11984,12018,12043,12288,12290,12293,12294,12295,12296,12297,12298,12300,13483,13618,14226,14297,14664,14811,14977,16439,16485,16502,16504,16510,16513,16520,16531,17706,17711,18115,18439,18797,18799,19264,20273,20496,20512,20529,20928,22063,22068,22784,27425,28080,28240,54376,54403,55991,56384,57423,63873,65973,66237,66658,67972,681…	Asic2,Atp1b1,Atp1b2,Atp1b3,Atp2b2,Atp5f1a,Atp5pf,Atp5me,Atp6v0d1,Atp6v1e1,Atp6v0a1,Atp6v0c,Bak1,Bcl2,Cacna1c,Cacna1e,Cacna2d1,Cacna2d3,Cacnb1,Cacnb2,Cacnb3,Cacnb4,Cacng2,Dpp6,Ednrb,Fkbp1b,Fxn,Slc6a9,Grin2a,Slc39a7,Itpr2,Kcna1,Kcnc1,Kcnc3,Kcnh1,Kcnj10,Kcnj4,Kcnma1,ATP8,CYTB,Nnt,P2rx7,Plcb3,Plcd1,Ptprc,Scn8a,Slc12a2,Slc1a3,Slc31a1,Abcc9,Trpc1,Trpc6,Slc30a3,Atp5mg,Atp5po,Trpm2,Cacng3,Slc4a4,Panx1,Le…	96/526
14_Member	GO Biological Processes	GO:0055080	monoatomic cation homeostasis	-10.8222	-8.71077	11606,11732,11816,11840,11931,11933,11941,11975,11984,12010,12018,12043,12288,12296,12298,12349,12351,12870,13618,13828,14061,14182,14226,14297,14299,14319,14325,14806,14824,14977,15212,15368,15458,16485,16510,16513,16531,17748,17750,17751,18605,18754,18799,18854,19063,19164,19309,20203,20496,20512,20533,20535,20536,21817,22042,22063,22068,22784,23959,29876,54403,56384,57816,63873,64051,64176,659…	Agt,Ank,Apoe,Arf1,Atp1b1,Atp1b3,Atp2b2,Atp6v0a1,Atp6v0c,B2m,Bak1,Bcl2,Cacna1c,Cacnb2,Cacnb4,Car2,Car4,Cp,Ednrb,Epb42,F2,Fgfr1,Fkbp1b,Fxn,Ncs1,Fth1,Ftl1,Grik2,Grn,Slc39a7,Hexb,Hmox1,Hpx,Kcna1,Kcnh1,Kcnj10,Kcnma1,Mt1,Mt2,Mt3,Enpp1,Prkce,Plcd1,Pml,Ppt1,Psen1,Pygm,S100b,Slc12a2,Slc1a3,Slc4a1,Slc4a2,Slc4a3,Tgm2,Tfrc,Trpc1,Trpc6,Slc30a3,Nt5e,Clic4,Slc4a4,Letm1,Tesc,Trpv4,Sv2a,Sv2b,Asph,Atp2b1,Maip1,Bdh…	85/523
14_Member	GO Biological Processes	GO:0050801	monoatomic ion homeostasis	-10.6859	-8.58359	11606,11732,11816,11840,11931,11933,11941,11975,11984,12010,12018,12043,12288,12296,12298,12349,12351,12870,13618,13828,14061,14182,14226,14297,14299,14319,14325,14806,14824,14977,15212,15368,15458,16485,16510,16513,16531,17748,17750,17751,18605,18754,18799,18854,19063,19164,19309,20203,20496,20512,20533,20535,20536,21817,22042,22063,22068,22784,23959,29876,54403,56384,57816,63873,64051,64176,659…	Agt,Ank,Apoe,Arf1,Atp1b1,Atp1b3,Atp2b2,Atp6v0a1,Atp6v0c,B2m,Bak1,Bcl2,Cacna1c,Cacnb2,Cacnb4,Car2,Car4,Cp,Ednrb,Epb42,F2,Fgfr1,Fkbp1b,Fxn,Ncs1,Fth1,Ftl1,Grik2,Grn,Slc39a7,Hexb,Hmox1,Hpx,Kcna1,Kcnh1,Kcnj10,Kcnma1,Mt1,Mt2,Mt3,Enpp1,Prkce,Plcd1,Pml,Ppt1,Psen1,Pygm,S100b,Slc12a2,Slc1a3,Slc4a1,Slc4a2,Slc4a3,Tgm2,Tfrc,Trpc1,Trpc6,Slc30a3,Nt5e,Clic4,Slc4a4,Letm1,Tesc,Trpv4,Sv2a,Sv2b,Asph,Atp2b1,Maip1,Bdh…	86/535
14_Member	GO Biological Processes	GO:0030003	intracellular monoatomic cation homeostasis	-10.2029	-7.98754	11606,11816,11840,11931,11932,11933,11941,11972,11975,11984,12010,12018,12043,12288,12296,12298,12307,12349,12870,14061,14226,14297,14299,14319,14325,14806,14824,14977,15212,15368,15458,16510,16531,17748,17750,17751,18754,18799,18854,19063,19164,19309,20203,20496,20512,20529,20533,20535,20536,21817,22042,22063,22068,22784,29876,54403,56384,57816,63873,64051,64176,65973,66333,67972,68115,69772,719…	Agt,Apoe,Arf1,Atp1b1,Atp1b2,Atp1b3,Atp2b2,Atp6v0d1,Atp6v0a1,Atp6v0c,B2m,Bak1,Bcl2,Cacna1c,Cacnb2,Cacnb4,Calb1,Car2,Cp,F2,Fkbp1b,Fxn,Ncs1,Fth1,Ftl1,Grik2,Grn,Slc39a7,Hexb,Hmox1,Hpx,Kcnh1,Kcnma1,Mt1,Mt2,Mt3,Prkce,Plcd1,Pml,Ppt1,Psen1,Pygm,S100b,Slc12a2,Slc1a3,Slc31a1,Slc4a1,Slc4a2,Slc4a3,Tgm2,Tfrc,Trpc1,Trpc6,Slc30a3,Clic4,Slc4a4,Letm1,Tesc,Trpv4,Sv2a,Sv2b,Asph,Aqp11,Atp2b1,Maip1,Bdh2,Tmem106b,Nol3…	81/441
14_Member	GO Biological Processes	GO:0055082	intracellular chemical homeostasis	-10.1959	-7.98536	11606,11816,11829,11840,11931,11932,11933,11941,11972,11975,11984,12010,12018,12043,12288,12296,12298,12307,12349,12870,14061,14226,14297,14299,14319,14325,14775,14806,14824,14977,15212,15277,15368,15458,15894,16510,16531,17748,17750,17751,18115,18605,18754,18799,18854,19055,19063,19164,19309,19326,19653,20203,20496,20512,20529,20533,20535,20536,20912,21817,22042,22063,22068,22329,22784,26570,298…	Agt,Apoe,Aqp4,Arf1,Atp1b1,Atp1b2,Atp1b3,Atp2b2,Atp6v0d1,Atp6v0a1,Atp6v0c,B2m,Bak1,Bcl2,Cacna1c,Cacnb2,Cacnb4,Calb1,Car2,Cp,F2,Fkbp1b,Fxn,Ncs1,Fth1,Ftl1,Gpx1,Grik2,Grn,Slc39a7,Hexb,Hk2,Hmox1,Hpx,Icam1,Kcnh1,Kcnma1,Mt1,Mt2,Mt3,Nnt,Enpp1,Prkce,Plcd1,Pml,Ppp3ca,Ppt1,Psen1,Pygm,Rab11b,Rbm4,S100b,Slc12a2,Slc1a3,Slc31a1,Slc4a1,Slc4a2,Slc4a3,Stxbp3,Tgm2,Tfrc,Trpc1,Trpc6,Vcam1,Slc30a3,Slc7a11,Clic4,Slc4a4…	99/585
14_Member	GO Biological Processes	GO:0030001	metal ion transport	-10.075	-8.04215	11418,11931,11933,11941,12010,12018,12043,12288,12290,12293,12294,12295,12296,12297,12298,12300,12870,13430,13483,13618,14226,14297,14319,14977,15458,16439,16485,16498,16502,16504,16510,16513,16520,16531,17751,18439,18797,18799,19055,19264,19326,20273,20496,20512,20928,22042,22063,22068,22784,28240,30805,53881,54376,54403,55991,56384,63873,65973,66658,67760,67972,68115,70839,72821,72961,74166,762…	Asic2,Atp1b1,Atp1b3,Atp2b2,B2m,Bak1,Bcl2,Cacna1c,Cacna1e,Cacna2d1,Cacna2d3,Cacnb1,Cacnb2,Cacnb3,Cacnb4,Cacng2,Cp,Dnm2,Dpp6,Ednrb,Fkbp1b,Fxn,Fth1,Slc39a7,Hpx,Itpr2,Kcna1,Kcnab2,Kcnc1,Kcnc3,Kcnh1,Kcnj10,Kcnj4,Kcnma1,Mt3,P2rx7,Plcb3,Plcd1,Ppp3ca,Ptprc,Rab11b,Scn8a,Slc12a2,Slc1a3,Abcc9,Tfrc,Trpc1,Trpc6,Slc30a3,Trpm2,Slc22a4,Slc5a3,Cacng3,Slc4a4,Panx1,Letm1,Trpv4,Asph,Ccdc51,Slc38a2,Atp2b1,Maip1,P2ry1…	95/632
14_Member	GO Biological Processes	GO:0006873	intracellular monoatomic ion homeostasis	-9.61282	-7.42768	11606,11816,11840,11931,11932,11933,11941,11972,11975,11984,12010,12018,12043,12288,12296,12298,12307,12349,12870,14061,14226,14297,14299,14319,14325,14806,14824,14977,15212,15368,15458,16510,16531,17748,17750,17751,18754,18799,18854,19063,19164,19309,20203,20496,20512,20529,20533,20535,20536,21817,22042,22063,22068,22784,29876,54403,56384,57816,63873,64051,64176,65973,66333,67972,68115,69772,719…	Agt,Apoe,Arf1,Atp1b1,Atp1b2,Atp1b3,Atp2b2,Atp6v0d1,Atp6v0a1,Atp6v0c,B2m,Bak1,Bcl2,Cacna1c,Cacnb2,Cacnb4,Calb1,Car2,Cp,F2,Fkbp1b,Fxn,Ncs1,Fth1,Ftl1,Grik2,Grn,Slc39a7,Hexb,Hmox1,Hpx,Kcnh1,Kcnma1,Mt1,Mt2,Mt3,Prkce,Plcd1,Pml,Ppt1,Psen1,Pygm,S100b,Slc12a2,Slc1a3,Slc31a1,Slc4a1,Slc4a2,Slc4a3,Tgm2,Tfrc,Trpc1,Trpc6,Slc30a3,Clic4,Slc4a4,Letm1,Tesc,Trpv4,Sv2a,Sv2b,Asph,Aqp11,Atp2b1,Maip1,Bdh2,Tmem106b,Nol3…	81/453
14_Member	GO Biological Processes	GO:0098771	inorganic ion homeostasis	-8.73961	-6.8555	11606,11732,11816,11840,11931,11933,11941,12010,12018,12043,12288,12296,12298,12870,13618,13828,14061,14182,14226,14297,14299,14319,14325,14806,14977,15212,15368,15458,16485,16510,16513,16531,17748,17750,17751,18605,18754,18799,18854,19164,19309,20203,20496,20512,21817,22042,22063,22068,22784,23959,56384,57816,63873,64051,64176,65973,67972,68115,69772,72961,76459,78688,83704,94220,98660,104027,11…	Agt,Ank,Apoe,Arf1,Atp1b1,Atp1b3,Atp2b2,B2m,Bak1,Bcl2,Cacna1c,Cacnb2,Cacnb4,Cp,Ednrb,Epb42,F2,Fgfr1,Fkbp1b,Fxn,Ncs1,Fth1,Ftl1,Grik2,Slc39a7,Hexb,Hmox1,Hpx,Kcna1,Kcnh1,Kcnj10,Kcnma1,Mt1,Mt2,Mt3,Enpp1,Prkce,Plcd1,Pml,Psen1,Pygm,S100b,Slc12a2,Slc1a3,Tgm2,Tfrc,Trpc1,Trpc6,Slc30a3,Nt5e,Letm1,Tesc,Trpv4,Sv2a,Sv2b,Asph,Atp2b1,Maip1,Bdh2,Slc17a7,Car12,Nol3,Slc12a9,Cnnm4,Atp1a2,Synpo,Slc8a2,Atp6v1b1,Tmem19…	72/455
14_Member	GO Biological Processes	GO:0070588	calcium ion transmembrane transport	-7.7914	-5.98859	11941,12018,12043,12288,12290,12293,12294,12295,12296,12297,12298,12300,13618,14226,16439,18439,18797,18799,19264,22063,22068,28240,54376,55991,56384,63873,65973,67972,68115,70839,74166,78688,81905,105722,110891,114774,192176,216001,319734	Atp2b2,Bak1,Bcl2,Cacna1c,Cacna1e,Cacna2d1,Cacna2d3,Cacnb1,Cacnb2,Cacnb3,Cacnb4,Cacng2,Ednrb,Fkbp1b,Itpr2,P2rx7,Plcb3,Plcd1,Ptprc,Trpc1,Trpc6,Trpm2,Cacng3,Panx1,Letm1,Trpv4,Asph,Atp2b1,Maip1,P2ry12,Tmem38a,Nol3,Cacng8,Ano6,Slc8a2,Pawr,Flna,Micu1,Cacna2d4	39/194
14_Member	GO Biological Processes	GO:0055074	calcium ion homeostasis	-5.6127	-4.09787	11732,11816,11931,11941,12018,12043,12288,12296,12298,14061,14182,14226,14297,14299,14806,15212,16510,18605,18754,18799,18854,19164,19309,20203,21817,22063,22068,23959,56384,63873,64051,64176,65973,67972,68115,78688,104027,110891,110935,216001,238988	Ank,Apoe,Atp1b1,Atp2b2,Bak1,Bcl2,Cacna1c,Cacnb2,Cacnb4,F2,Fgfr1,Fkbp1b,Fxn,Ncs1,Grik2,Hexb,Kcnh1,Enpp1,Prkce,Plcd1,Pml,Psen1,Pygm,S100b,Tgm2,Trpc1,Trpc6,Nt5e,Letm1,Trpv4,Sv2a,Sv2b,Asph,Atp2b1,Maip1,Nol3,Synpo,Slc8a2,Atp6v1b1,Micu1,Erc2	41/251
14_Member	GO Biological Processes	GO:0006816	calcium ion transport	-5.05448	-3.63011	11941,12018,12043,12288,12290,12293,12294,12295,12296,12297,12298,12300,13618,14226,16439,18439,18797,18799,19055,19264,22063,22068,28240,54376,55991,56384,63873,65973,67972,68115,70839,74166,78688,81905,105722,110891,114774,192176,216001,319734	Atp2b2,Bak1,Bcl2,Cacna1c,Cacna1e,Cacna2d1,Cacna2d3,Cacnb1,Cacnb2,Cacnb3,Cacnb4,Cacng2,Ednrb,Fkbp1b,Itpr2,P2rx7,Plcb3,Plcd1,Ppp3ca,Ptprc,Trpc1,Trpc6,Trpm2,Cacng3,Panx1,Letm1,Trpv4,Asph,Atp2b1,Maip1,P2ry12,Tmem38a,Nol3,Cacng8,Ano6,Slc8a2,Pawr,Flna,Micu1,Cacna2d4	40/255
14_Member	GO Biological Processes	GO:0006874	intracellular calcium ion homeostasis	-4.93706	-3.53626	11816,11931,11941,12018,12043,12288,12296,12298,14061,14226,14297,14299,14806,15212,16510,18754,18799,18854,19164,19309,20203,21817,22063,22068,56384,63873,64051,64176,65973,67972,68115,78688,104027,110891,216001,238988	Apoe,Atp1b1,Atp2b2,Bak1,Bcl2,Cacna1c,Cacnb2,Cacnb4,F2,Fkbp1b,Fxn,Ncs1,Grik2,Hexb,Kcnh1,Prkce,Plcd1,Pml,Psen1,Pygm,S100b,Tgm2,Trpc1,Trpc6,Letm1,Trpv4,Sv2a,Sv2b,Asph,Atp2b1,Maip1,Nol3,Synpo,Slc8a2,Micu1,Erc2	36/222
14_Member	GO Biological Processes	GO:0097553	calcium ion transmembrane import into cytosol	-4.09231	-2.84656	12018,12043,12288,12290,12293,12297,14226,16439,18439,18797,18799,19264,28240,56384,63873,74166,78688,110891,114774,192176	Bak1,Bcl2,Cacna1c,Cacna1e,Cacna2d1,Cacnb3,Fkbp1b,Itpr2,P2rx7,Plcb3,Plcd1,Ptprc,Trpm2,Letm1,Trpv4,Tmem38a,Nol3,Slc8a2,Pawr,Flna	20/103
15_Summary	GO Biological Processes	GO:0016054	organic acid catabolic process	-16.2257	-13.5671	11363,11364,11370,11409,11430,11847,12411,12896,13171,14073,14085,15107,15211,15212,15488,16922,18242,19125,19703,20501,23986,30956,52430,52815,56794,58875,67460,67528,69219,69772,71985,74091,76187,80911,97212,104174,106861,107747,110959,216188,231086,245847,257635,434437,11668,11816,14635,18950,22271,57357,109801,109857,319625,12894,13167,13850,17850,19063,19224,23887,26897,56473,68041,68801,941…	Acadl,Acadm,Acadvl,Acads,Acox1,Arg2,Cbs,Cpt2,Dbt,Faah,Fah,Hadh,Hexa,Hexb,Hsd17b4,Phyh,Oat,Prodh,Renbp,Slc16a1,Eci2,Aass,Echdc2,Ldhd,Hacl1,Hibadh,Decr1,Nudt7,Ddah1,Bdh2,Acad10,Npl,Adhfe1,Acox3,Hadha,Gldc,Abhd3,Aldh1l1,Nudt19,Aldh1l2,Hadhb,Amdhd2,Sdsl,Amt,Aldh1a1,Apoe,Galk1,Pnp,Upp1,Srd5a3,Glo1,Cbr3,Galm,Cpt1a,Dbi,Ephx2,Mmut,Ppt1,Ptgs1,Ggt5,Acot1,Fads2,Mid1ip1,Elovl5,Acsbg1,Acsf2,Acot11,Pon2,Prdx6,…	107/-
15_Member	GO Biological Processes	GO:0016054	organic acid catabolic process	-16.2257	-13.5671	11363,11364,11370,11409,11430,11847,12411,12896,13171,14073,14085,15107,15211,15212,15488,16922,18242,19125,19703,20501,23986,30956,52430,52815,56794,58875,67460,67528,69219,69772,71985,74091,76187,80911,97212,104174,106861,107747,110959,216188,231086,245847,257635,434437	Acadl,Acadm,Acadvl,Acads,Acox1,Arg2,Cbs,Cpt2,Dbt,Faah,Fah,Hadh,Hexa,Hexb,Hsd17b4,Phyh,Oat,Prodh,Renbp,Slc16a1,Eci2,Aass,Echdc2,Ldhd,Hacl1,Hibadh,Decr1,Nudt7,Ddah1,Bdh2,Acad10,Npl,Adhfe1,Acox3,Hadha,Gldc,Abhd3,Aldh1l1,Nudt19,Aldh1l2,Hadhb,Amdhd2,Sdsl,Amt	44/219
15_Member	GO Biological Processes	GO:0046395	carboxylic acid catabolic process	-16.2257	-13.5671	11363,11364,11370,11409,11430,11847,12411,12896,13171,14073,14085,15107,15211,15212,15488,16922,18242,19125,19703,20501,23986,30956,52430,52815,56794,58875,67460,67528,69219,69772,71985,74091,76187,80911,97212,104174,106861,107747,110959,216188,231086,245847,257635,434437	Acadl,Acadm,Acadvl,Acads,Acox1,Arg2,Cbs,Cpt2,Dbt,Faah,Fah,Hadh,Hexa,Hexb,Hsd17b4,Phyh,Oat,Prodh,Renbp,Slc16a1,Eci2,Aass,Echdc2,Ldhd,Hacl1,Hibadh,Decr1,Nudt7,Ddah1,Bdh2,Acad10,Npl,Adhfe1,Acox3,Hadha,Gldc,Abhd3,Aldh1l1,Nudt19,Aldh1l2,Hadhb,Amdhd2,Sdsl,Amt	44/219
15_Member	GO Biological Processes	GO:0044282	small molecule catabolic process	-15.07	-12.4995	11363,11364,11370,11409,11430,11668,11816,11847,12411,12896,13171,14073,14085,14635,15107,15211,15212,15488,16922,18242,18950,19125,19703,20501,22271,23986,30956,52430,52815,56794,57357,58875,67460,67528,69219,69772,71985,74091,76187,80911,97212,104174,106861,107747,109801,109857,110959,216188,231086,245847,257635,319625,434437	Acadl,Acadm,Acadvl,Acads,Acox1,Aldh1a1,Apoe,Arg2,Cbs,Cpt2,Dbt,Faah,Fah,Galk1,Hadh,Hexa,Hexb,Hsd17b4,Phyh,Oat,Pnp,Prodh,Renbp,Slc16a1,Upp1,Eci2,Aass,Echdc2,Ldhd,Hacl1,Srd5a3,Hibadh,Decr1,Nudt7,Ddah1,Bdh2,Acad10,Npl,Adhfe1,Acox3,Hadha,Gldc,Abhd3,Aldh1l1,Glo1,Cbr3,Nudt19,Aldh1l2,Hadhb,Amdhd2,Sdsl,Galm,Amt	53/329
15_Member	GO Biological Processes	GO:0072329	monocarboxylic acid catabolic process	-12.6258	-10.3289	11363,11364,11370,11409,11430,12896,14073,14085,15107,15211,15212,15488,16922,20501,23986,52430,52815,56794,67460,67528,69772,71985,80911,97212,106861,110959,216188,231086	Acadl,Acadm,Acadvl,Acads,Acox1,Cpt2,Faah,Fah,Hadh,Hexa,Hexb,Hsd17b4,Phyh,Slc16a1,Eci2,Echdc2,Ldhd,Hacl1,Decr1,Nudt7,Bdh2,Acad10,Acox3,Hadha,Abhd3,Nudt19,Aldh1l2,Hadhb	28/116
15_Member	Reactome Gene Sets	R-MMU-8978868	Fatty acid metabolism	-11.8876	-9.66828	11363,11364,11370,11409,11430,12894,12896,13167,13850,14073,15107,15488,16922,17850,19063,19224,23887,23986,26897,56473,56794,67460,68041,68801,71985,80911,94180,97212,110959,231086,264895,329910,330260	Acadl,Acadm,Acadvl,Acads,Acox1,Cpt1a,Cpt2,Dbi,Ephx2,Faah,Hadh,Hsd17b4,Phyh,Mmut,Ppt1,Ptgs1,Ggt5,Eci2,Acot1,Fads2,Hacl1,Decr1,Mid1ip1,Elovl5,Acad10,Acox3,Acsbg1,Hadha,Nudt19,Hadhb,Acsf2,Acot11,Pon2	33/170
15_Member	GO Biological Processes	GO:0009062	fatty acid catabolic process	-11.3737	-9.2134	11363,11364,11370,11409,11430,12896,14073,15107,15488,16922,23986,52430,56794,67460,67528,69772,71985,80911,97212,106861,110959,216188,231086	Acadl,Acadm,Acadvl,Acads,Acox1,Cpt2,Faah,Hadh,Hsd17b4,Phyh,Eci2,Echdc2,Hacl1,Decr1,Nudt7,Bdh2,Acad10,Acox3,Hadha,Abhd3,Nudt19,Aldh1l2,Hadhb	23/87
15_Member	GO Biological Processes	GO:0016042	lipid catabolic process	-11.1453	-9.00846	11363,11364,11370,11409,11430,11758,11808,11816,12896,14073,15107,15211,15212,15488,16922,18797,18799,18802,18805,18806,19063,20397,22629,23986,52430,56794,57357,67460,67528,67732,69772,71985,80911,97212,104816,105501,106861,110959,114664,216188,231086,231871,269060	Acadl,Acadm,Acadvl,Acads,Acox1,Prdx6,Apoa4,Apoe,Cpt2,Faah,Hadh,Hexa,Hexb,Hsd17b4,Phyh,Plcb3,Plcd1,Plcd4,Pld1,Pld2,Ppt1,Sgpl1,Ywhah,Eci2,Echdc2,Hacl1,Srd5a3,Decr1,Nudt7,Iah1,Bdh2,Acad10,Acox3,Hadha,Aspg,Abhd4,Abhd3,Nudt19,Hsd17b11,Aldh1l2,Hadhb,Daglb,Dagla	43/289
15_Member	GO Biological Processes	GO:0019395	fatty acid oxidation	-10.2663	-8.20423	11363,11364,11370,11409,11430,12896,15107,15488,16922,23986,26416,52430,56794,67460,69772,71985,72674,80911,97212,216188,231086	Acadl,Acadm,Acadvl,Acads,Acox1,Cpt2,Hadh,Hsd17b4,Phyh,Eci2,Mapk14,Echdc2,Hacl1,Decr1,Bdh2,Acad10,Adipor1,Acox3,Hadha,Aldh1l2,Hadhb	21/81
15_Member	GO Biological Processes	GO:0044242	cellular lipid catabolic process	-10.0767	-8.04215	11363,11364,11370,11409,11430,11758,12896,14073,15107,15211,15212,15488,16922,18797,18805,18806,20397,23986,52430,56794,57357,67460,67528,69772,71985,80911,97212,106861,110959,216188,231086,231871,269060	Acadl,Acadm,Acadvl,Acads,Acox1,Prdx6,Cpt2,Faah,Hadh,Hexa,Hexb,Hsd17b4,Phyh,Plcb3,Pld1,Pld2,Sgpl1,Eci2,Echdc2,Hacl1,Srd5a3,Decr1,Nudt7,Bdh2,Acad10,Acox3,Hadha,Abhd3,Nudt19,Aldh1l2,Hadhb,Daglb,Dagla	33/197
15_Member	GO Biological Processes	GO:0032787	monocarboxylic acid metabolic process	-9.98797	-7.96532	11363,11364,11370,11409,11430,11484,11668,12894,12896,13167,13849,13850,14073,14085,14635,14732,15107,15211,15212,15277,15488,16149,16922,17850,19224,19317,19659,20397,20501,20512,20617,23887,23986,26416,26897,52430,52815,56473,56794,67103,67460,67528,68738,68801,69772,71985,72674,80911,94180,94284,97212,106861,109801,110959,216188,231086,231871,236539,264895,269060,269951,329910,545123	Acadl,Acadm,Acadvl,Acads,Acox1,Aspa,Aldh1a1,Cpt1a,Cpt2,Dbi,Ephx1,Ephx2,Faah,Fah,Galk1,Gpam,Hadh,Hexa,Hexb,Hk2,Hsd17b4,Cd74,Phyh,Mmut,Ptgs1,Qki,Rbp1,Sgpl1,Slc16a1,Slc1a3,Snca,Ggt5,Eci2,Mapk14,Acot1,Echdc2,Ldhd,Fads2,Hacl1,Ptgr1,Decr1,Nudt7,Acss1,Elovl5,Bdh2,Acad10,Adipor1,Acox3,Acsbg1,Ugt1a6a,Hadha,Abhd3,Glo1,Nudt19,Aldh1l2,Hadhb,Daglb,Phgdh,Acsf2,Dagla,Idh2,Acot11,Cyp2d11	63/575
15_Member	GO Biological Processes	GO:0006631	fatty acid metabolic process	-9.75441	-7.76089	11363,11364,11370,11409,11430,12894,12896,13167,13849,13850,14073,14732,15107,15488,16149,16922,17850,19224,19317,20397,20617,23887,23986,26416,26897,52430,56473,56794,67103,67460,67528,68738,68801,69772,71985,72674,80911,94180,97212,106861,110959,216188,231086,231871,264895,269060,329910,545123	Acadl,Acadm,Acadvl,Acads,Acox1,Cpt1a,Cpt2,Dbi,Ephx1,Ephx2,Faah,Gpam,Hadh,Hsd17b4,Cd74,Phyh,Mmut,Ptgs1,Qki,Sgpl1,Snca,Ggt5,Eci2,Mapk14,Acot1,Echdc2,Fads2,Hacl1,Ptgr1,Decr1,Nudt7,Acss1,Elovl5,Bdh2,Acad10,Adipor1,Acox3,Acsbg1,Hadha,Abhd3,Nudt19,Aldh1l2,Hadhb,Daglb,Acsf2,Dagla,Acot11,Cyp2d11	48/381
15_Member	GO Biological Processes	GO:0006635	fatty acid beta-oxidation	-9.47406	-7.51657	11363,11364,11370,11409,11430,12896,15107,15488,23986,52430,67460,69772,71985,80911,97212,216188,231086	Acadl,Acadm,Acadvl,Acads,Acox1,Cpt2,Hadh,Hsd17b4,Eci2,Echdc2,Decr1,Bdh2,Acad10,Acox3,Hadha,Aldh1l2,Hadhb	17/57
15_Member	GO Biological Processes	GO:0034440	lipid oxidation	-9.43653	-7.48119	11363,11364,11370,11409,11430,12896,15107,15488,16922,23986,26416,52430,56794,67460,69772,71985,72674,80911,97212,216188,231086	Acadl,Acadm,Acadvl,Acads,Acox1,Cpt2,Hadh,Hsd17b4,Phyh,Eci2,Mapk14,Echdc2,Hacl1,Decr1,Bdh2,Acad10,Adipor1,Acox3,Hadha,Aldh1l2,Hadhb	21/89
15_Member	GO Biological Processes	GO:0030258	lipid modification	-8.94254	-7.03173	11363,11364,11370,11409,11430,12896,13850,15107,15488,16331,16332,16922,17772,23986,26416,52430,56794,67460,69772,71985,72674,80911,97212,103199,216188,229791,231086,381925,672511	Acadl,Acadm,Acadvl,Acads,Acox1,Cpt2,Ephx2,Hadh,Hsd17b4,Inpp5d,Inppl1,Phyh,Mtm1,Eci2,Mapk14,Echdc2,Hacl1,Decr1,Bdh2,Acad10,Adipor1,Acox3,Hadha,Fig4,Aldh1l2,Plppr4,Hadhb,Plpp4,Rnf213	29/173
16_Summary	GO Biological Processes	GO:0031345	negative regulation of cell projection organization	-15.9971	-13.1477	11491,11512,11816,12010,12345,12494,13131,13132,13430,13642,13643,13838,13841,13844,14580,14745,14964,14972,16332,16412,16852,17196,17751,17756,17758,18186,18753,19055,19164,19268,19280,20562,20563,20745,21838,22068,22241,22352,22601,22629,23991,63873,65079,66610,76089,76893,94175,140571,192176,214968,216049,216363,216616,226422,235106,236576,237847,239667,240057,245537,269295,270120,11421,11739,…	Adam17,Adcy6,Apoe,B2m,Capzb,Cd38,Dab1,Dab2,Dnm2,Efnb2,Efnb3,Epha4,Epha7,Ephb2,Gfap,Lpar1,H2-D1,H2-K1,Inppl1,Itgb1,Lgals1,Mbp,Mt3,Map2,Map4,Nrp1,Prkcd,Ppp3ca,Psen1,Ptprf,Ptprs,Slit1,Slit2,Spock1,Thy1,Trpc6,Ulk1,Vim,Yap1,Ywhah,Cib1,Trpv4,Rtn4r,Abi3,Rapgef2,Cers2,Hrg,Plxnb3,Flna,Sema6d,Zfp365,Rab3ip,Efemp1,Rab29,Ntm,Spry3,Rtn4rl1,Dip2b,Syngap1,Nlgn3,Rtn4rl2,Fat3,Ace,Slc25a4,Apoa1,Apoa4,Apod,Bak1,Cap…	173/-
16_Member	GO Biological Processes	GO:0031345	negative regulation of cell projection organization	-15.9971	-13.1477	11491,11512,11816,12010,12345,12494,13131,13132,13430,13642,13643,13838,13841,13844,14580,14745,14964,14972,16332,16412,16852,17196,17751,17756,17758,18186,18753,19055,19164,19268,19280,20562,20563,20745,21838,22068,22241,22352,22601,22629,23991,63873,65079,66610,76089,76893,94175,140571,192176,214968,216049,216363,216616,226422,235106,236576,237847,239667,240057,245537,269295,270120	Adam17,Adcy6,Apoe,B2m,Capzb,Cd38,Dab1,Dab2,Dnm2,Efnb2,Efnb3,Epha4,Epha7,Ephb2,Gfap,Lpar1,H2-D1,H2-K1,Inppl1,Itgb1,Lgals1,Mbp,Mt3,Map2,Map4,Nrp1,Prkcd,Ppp3ca,Psen1,Ptprf,Ptprs,Slit1,Slit2,Spock1,Thy1,Trpc6,Ulk1,Vim,Yap1,Ywhah,Cib1,Trpv4,Rtn4r,Abi3,Rapgef2,Cers2,Hrg,Plxnb3,Flna,Sema6d,Zfp365,Rab3ip,Efemp1,Rab29,Ntm,Spry3,Rtn4rl1,Dip2b,Syngap1,Nlgn3,Rtn4rl2,Fat3	62/226
16_Member	GO Biological Processes	GO:0051129	negative regulation of cellular component organization	-13.2653	-10.737	11421,11491,11512,11739,11806,11808,11815,11816,12010,12018,12332,12345,12386,12494,12759,12955,13010,13131,13132,13430,13548,13589,13642,13643,13838,13841,13844,14130,14297,14580,14745,14775,14964,14972,15381,15530,15944,16332,16412,16423,16456,16765,16835,16852,16854,16905,17196,17751,17756,17758,17762,17772,18186,18613,18637,18753,18854,19055,19164,19268,19280,19684,19876,20562,20563,20617,207…	Ace,Adam17,Adcy6,Slc25a4,Apoa1,Apoa4,Apod,Apoe,B2m,Bak1,Capg,Capzb,Ctnna2,Cd38,Clu,Cryab,Cst3,Dab1,Dab2,Dnm2,Dyrk1a,Mapre1,Efnb2,Efnb3,Epha4,Epha7,Ephb2,Fcgr2b,Fxn,Gfap,Lpar1,Gpx1,H2-D1,H2-K1,Hnrnpc,Hspg2,Irgm1,Inppl1,Itgb1,Cd47,F11r,Stmn1,Ldlr,Lgals1,Lgals3,Lmna,Mbp,Mt3,Map2,Map4,Mapt,Mtm1,Nrp1,Pecam1,Pfdn2,Prkcd,Pml,Ppp3ca,Psen1,Ptprf,Ptprs,Rdx,Robo1,Slit1,Slit2,Snca,Spta1,Spock1,Stat1,Thy1,Tjp…	132/784
16_Member	GO Biological Processes	GO:0010977	negative regulation of neuron projection development	-12.0117	-9.61433	11491,11512,11816,12010,12494,13131,13132,13642,13643,13838,13841,13844,14580,14745,14964,14972,16332,16852,17196,17751,17756,18186,19164,19280,20562,20563,20745,21838,22241,22352,23991,63873,65079,76893,192176,214968,216049,216616,226422,235106,237847,239667,240057,245537,269295,270120	Adam17,Adcy6,Apoe,B2m,Cd38,Dab1,Dab2,Efnb2,Efnb3,Epha4,Epha7,Ephb2,Gfap,Lpar1,H2-D1,H2-K1,Inppl1,Lgals1,Mbp,Mt3,Map2,Nrp1,Psen1,Ptprs,Slit1,Slit2,Spock1,Thy1,Ulk1,Vim,Cib1,Trpv4,Rtn4r,Cers2,Flna,Sema6d,Zfp365,Efemp1,Rab29,Ntm,Rtn4rl1,Dip2b,Syngap1,Nlgn3,Rtn4rl2,Fat3	46/168
16_Member	GO Biological Processes	GO:0051961	negative regulation of nervous system development	-6.0458	-4.24148	12010,12385,13131,13643,13841,13844,14061,16835,17196,17751,17756,18186,18213,19055,19164,19280,19876,20562,20563,21648,21838,22068,22241,22629,24088,56710,65079,74762,76089,76893,83433,171469,214968,235402,239667,240057,269951	B2m,Ctnna1,Dab1,Efnb3,Epha7,Ephb2,F2,Ldlr,Mbp,Mt3,Map2,Nrp1,Ntrk3,Ppp3ca,Psen1,Ptprs,Robo1,Slit1,Slit2,Dynlt1b,Thy1,Trpc6,Ulk1,Ywhah,Tlr2,Brinp1,Rtn4r,Mdga1,Rapgef2,Cers2,Trem2,Gpr37l1,Sema6d,Lingo1,Dip2b,Syngap1,Idh2	37/183
16_Member	GO Biological Processes	GO:0050768	negative regulation of neurogenesis	-5.21045	-3.52495	12010,12385,13131,13643,13841,13844,14061,16835,17196,17751,17756,18186,18213,19055,19164,19280,20562,20563,21648,21838,22068,22241,22629,56710,65079,76089,76893,83433,171469,214968,235402,239667,240057,269951	B2m,Ctnna1,Dab1,Efnb3,Epha7,Ephb2,F2,Ldlr,Mbp,Mt3,Map2,Nrp1,Ntrk3,Ppp3ca,Psen1,Ptprs,Slit1,Slit2,Dynlt1b,Thy1,Trpc6,Ulk1,Ywhah,Brinp1,Rtn4r,Rapgef2,Cers2,Trem2,Gpr37l1,Sema6d,Lingo1,Dip2b,Syngap1,Idh2	34/175
16_Member	GO Biological Processes	GO:0050771	negative regulation of axonogenesis	-4.60461	-3.00193	13131,13643,13841,13844,17196,17751,17756,18186,19164,19280,20562,20563,21838,22241,65079,214968,239667,240057	Dab1,Efnb3,Epha7,Ephb2,Mbp,Mt3,Map2,Nrp1,Psen1,Ptprs,Slit1,Slit2,Thy1,Ulk1,Rtn4r,Sema6d,Dip2b,Syngap1	18/71
16_Member	GO Biological Processes	GO:0010721	negative regulation of cell development	-4.58973	-2.98896	12010,12262,12385,12505,13131,13618,13643,13841,13844,14061,15354,15507,15944,16149,16331,16768,16835,16952,17096,17196,17751,17756,18186,18213,19055,19164,19280,19317,20535,20562,20563,21648,21807,21838,21873,22068,22241,22629,56710,65079,65963,76089,76893,83433,171469,214968,235402,239667,240057,269951,381305	B2m,C1qc,Ctnna1,Cd44,Dab1,Ednrb,Efnb3,Epha7,Ephb2,F2,Hmgb3,Hspb1,Irgm1,Cd74,Inpp5d,Lag3,Ldlr,Anxa1,Lyn,Mbp,Mt3,Map2,Nrp1,Ntrk3,Ppp3ca,Psen1,Ptprs,Qki,Slc4a2,Slit1,Slit2,Dynlt1b,Tsc22d1,Thy1,Tjp2,Trpc6,Ulk1,Ywhah,Brinp1,Rtn4r,Tmem176b,Rapgef2,Cers2,Trem2,Gpr37l1,Sema6d,Lingo1,Dip2b,Syngap1,Idh2,Rc3h1	51/326
16_Member	GO Biological Processes	GO:0045596	negative regulation of cell differentiation	-2.87959	-1.90423	12010,12262,12385,12505,12803,12978,13131,13618,13649,13838,13841,14182,14381,15944,16149,16331,16412,16768,17096,17125,17756,18133,18213,19055,19205,19317,19664,20203,20848,21648,21838,21873,22241,22601,22608,22629,23991,54720,56710,63873,65079,67628,69064,70839,72674,76089,76893,83433,171469,214968,216616,240057,269951	B2m,C1qc,Ctnna1,Cd44,Cntf,Csf1r,Dab1,Ednrb,Egfr,Epha4,Epha7,Fgfr1,G6pdx,Irgm1,Cd74,Inpp5d,Itgb1,Lag3,Lyn,Smad1,Map2,Ccn3,Ntrk3,Ppp3ca,Ptbp1,Qki,Rbpj,S100b,Stat3,Dynlt1b,Thy1,Tjp2,Ulk1,Yap1,Ybx1,Ywhah,Cib1,Rcan1,Brinp1,Trpv4,Rtn4r,Anp32b,Fuom,P2ry12,Adipor1,Rapgef2,Cers2,Trem2,Gpr37l1,Sema6d,Efemp1,Syngap1,Idh2	53/758
17_Summary	Reactome Gene Sets	R-MMU-556833	Metabolism of lipids	-15.7068	-12.9375	11363,11364,11370,11409,11430,11657,11690,11840,11881,11886,12140,12891,12894,12896,13121,13124,13167,13360,13479,13850,14073,14137,14148,14187,14421,14473,14593,14732,14775,14792,15107,15211,15212,15483,15488,16331,16332,16922,17113,17772,17850,17855,18707,18717,18719,18806,19063,19215,19224,20397,20598,22239,23887,23986,26879,26897,28042,52123,56018,56348,56473,56794,57357,59045,66234,66427,665…	Acadl,Acadm,Acadvl,Acads,Acox1,Alb,Alox5ap,Arf1,Arsb,Asah1,Fabp7,Cpne6,Cpt1a,Cpt2,Cyp51,Cyp8b1,Dbi,Dhcr7,Dpep1,Ephx2,Faah,Fdft1,Fdx1,Akr1b8,B4galnt1,Gc,Ggps1,Gpam,Gpx1,Lpcat3,Hadh,Hexa,Hexb,Hsd11b1,Hsd17b4,Inpp5d,Inppl1,Phyh,M6pr,Mtm1,Mmut,Mvk,Pik3cd,Pip5k1c,Pip5k1b,Pld2,Ppt1,Ptgds,Ptgs1,Sgpl1,Smpd2,Ugt8a,Ggt5,Eci2,B3galnt1,Acot1,Selenoi,Agpat5,Stard10,Hsd17b12,Fads2,Hacl1,Srd5a3,Stard3,Msmo1,Cyb…	168/-
17_Member	Reactome Gene Sets	R-MMU-556833	Metabolism of lipids	-15.7068	-12.9375	11363,11364,11370,11409,11430,11657,11690,11840,11881,11886,12140,12891,12894,12896,13121,13124,13167,13360,13479,13850,14073,14137,14148,14187,14421,14473,14593,14732,14775,14792,15107,15211,15212,15483,15488,16331,16332,16922,17113,17772,17850,17855,18707,18717,18719,18806,19063,19215,19224,20397,20598,22239,23887,23986,26879,26897,28042,52123,56018,56348,56473,56794,57357,59045,66234,66427,665…	Acadl,Acadm,Acadvl,Acads,Acox1,Alb,Alox5ap,Arf1,Arsb,Asah1,Fabp7,Cpne6,Cpt1a,Cpt2,Cyp51,Cyp8b1,Dbi,Dhcr7,Dpep1,Ephx2,Faah,Fdft1,Fdx1,Akr1b8,B4galnt1,Gc,Ggps1,Gpam,Gpx1,Lpcat3,Hadh,Hexa,Hexb,Hsd11b1,Hsd17b4,Inpp5d,Inppl1,Phyh,M6pr,Mtm1,Mmut,Mvk,Pik3cd,Pip5k1c,Pip5k1b,Pld2,Ppt1,Ptgds,Ptgs1,Sgpl1,Smpd2,Ugt8a,Ggt5,Eci2,B3galnt1,Acot1,Selenoi,Agpat5,Stard10,Hsd17b12,Fads2,Hacl1,Srd5a3,Stard3,Msmo1,Cyb…	117/614
17_Member	GO Biological Processes	GO:0006644	phospholipid metabolic process	-6.71297	-4.81211	11758,11806,11808,13167,14137,14731,14732,14792,15212,16331,16332,17101,17772,17855,18606,18707,18717,18719,18797,18799,18802,18805,18806,20598,20617,27226,27392,28042,52123,56193,56442,66586,68971,84652,97212,99010,103199,104816,105501,106861,110196,192156,208715,216152,216439,217480,225010,226856,227102,227333,228550,229791,233315,235044,244882,270084,319554,380921,381925	Prdx6,Apoa1,Apoa4,Dbi,Fdft1,Gpaa1,Gpam,Lpcat3,Hexb,Inpp5d,Inppl1,Lyst,Mtm1,Mvk,Enpp2,Pik3cd,Pip5k1c,Pip5k1b,Plcb3,Plcd1,Plcd4,Pld1,Pld2,Smpd2,Snca,Pla2g7,Pign,Selenoi,Agpat5,Plek,Serinc1,Crls1,Tamm41,Hycc1,Hadha,Lpcat4,Fig4,Aspg,Abhd4,Abhd3,Fdps,Mvd,Hmgcs1,Plppr3,Agap2,Dgkb,Lclat1,Lpgat1,Ormdl1,Dgkd,Itpka,Plppr4,Mtmr10,Plppr2,Tnfaip8l3,Lpcat2,Idi1,Dgkh,Plpp4	59/340
17_Member	GO Biological Processes	GO:0046486	glycerolipid metabolic process	-5.58491	-3.85314	11758,11806,11808,11816,11818,12359,12894,13167,14073,14731,14732,14775,14792,16331,16332,16889,17772,17777,18606,18707,18717,18719,18797,18799,18802,18805,18806,27226,27392,28042,30805,52123,56193,56442,66586,68971,84652,97212,99010,103199,105501,106861,216439,217480,225010,226856,227231,227333,228550,231871,233315,238055,244882,269060,270084,380921	Prdx6,Apoa1,Apoa4,Apoe,Apoh,Cat,Cpt1a,Dbi,Faah,Gpaa1,Gpam,Gpx1,Lpcat3,Inpp5d,Inppl1,Lipa,Mtm1,Mttp,Enpp2,Pik3cd,Pip5k1c,Pip5k1b,Plcb3,Plcd1,Plcd4,Pld1,Pld2,Pla2g7,Pign,Selenoi,Slc22a4,Agpat5,Plek,Serinc1,Crls1,Tamm41,Hycc1,Hadha,Lpcat4,Fig4,Abhd4,Abhd3,Agap2,Dgkb,Lclat1,Lpgat1,Cps1,Dgkd,Itpka,Daglb,Mtmr10,Apob,Tnfaip8l3,Dagla,Lpcat2,Dgkh	56/342
17_Member	Reactome Gene Sets	R-MMU-1483257	Phospholipid metabolism	-4.83473	-3.45279	12891,14732,16331,16332,17772,18717,18719,18806,28042,56018,69769,70568,83436,97212,100434,103199,105501,106861,106869,216724,231086,266692,270084	Cpne6,Gpam,Inpp5d,Inppl1,Mtm1,Pip5k1c,Pip5k1b,Pld2,Selenoi,Stard10,Tnfaip8l2,Cpne3,Plekha2,Hadha,Slc44a1,Fig4,Abhd4,Abhd3,Tnfaip8,Rufy1,Hadhb,Cpne1,Lpcat2	23/187
17_Member	GO Biological Processes	GO:0006650	glycerophospholipid metabolic process	-4.50648	-2.92431	11758,11806,11808,13167,14731,14732,14792,16331,16332,17772,18606,18707,18717,18719,18797,18799,18802,18805,18806,27226,27392,28042,52123,56193,56442,66586,68971,84652,97212,99010,103199,105501,106861,216439,217480,225010,226856,227333,228550,233315,244882,270084,380921	Prdx6,Apoa1,Apoa4,Dbi,Gpaa1,Gpam,Lpcat3,Inpp5d,Inppl1,Mtm1,Enpp2,Pik3cd,Pip5k1c,Pip5k1b,Plcb3,Plcd1,Plcd4,Pld1,Pld2,Pla2g7,Pign,Selenoi,Agpat5,Plek,Serinc1,Crls1,Tamm41,Hycc1,Hadha,Lpcat4,Fig4,Abhd4,Abhd3,Agap2,Dgkb,Lclat1,Lpgat1,Dgkd,Itpka,Mtmr10,Tnfaip8l3,Lpcat2,Dgkh	43/261
17_Member	GO Biological Processes	GO:0008610	lipid biosynthetic process	-4.20305	-2.68565	11668,11806,11886,13121,13124,13360,13884,14137,14148,14348,14381,14421,14593,14731,14732,14792,15212,15483,16149,16332,16889,17855,18439,18514,18707,18717,18719,18805,18806,19215,19224,19317,19378,19659,20598,22239,23887,27392,28042,52123,56348,56442,56473,57357,59045,60527,66234,66586,68738,68801,68971,76893,84652,94180,99010,105501,106861,110196,114664,192156,192970,208715,217480,225010,226856…	Aldh1a1,Apoa1,Asah1,Cyp51,Cyp8b1,Dhcr7,Ces1c,Fdft1,Fdx1,Fut9,G6pdx,B4galnt1,Ggps1,Gpaa1,Gpam,Lpcat3,Hexb,Hsd11b1,Cd74,Inppl1,Lipa,Mvk,P2rx7,Pbx1,Pik3cd,Pip5k1c,Pip5k1b,Pld1,Pld2,Ptgds,Ptgs1,Qki,Aldh1a2,Rbp1,Smpd2,Ugt8a,Ggt5,Pign,Selenoi,Agpat5,Hsd17b12,Serinc1,Fads2,Srd5a3,Stard3,Fads3,Msmo1,Crls1,Acss1,Elovl5,Tamm41,Cers2,Hycc1,Acsbg1,Lpcat4,Abhd4,Abhd3,Fdps,Hsd17b11,Mvd,Dhrs11,Hmgcs1,Dgkb,Lclat…	74/543
17_Member	GO Biological Processes	GO:0008654	phospholipid biosynthetic process	-3.49819	-2.11774	11806,14731,14732,14792,15212,16332,17855,18707,18717,18719,18805,18806,27392,28042,52123,56442,66586,68971,84652,99010,105501,110196,192156,208715,217480,225010,226856,227102,227333,228550,270084,319554,380921	Apoa1,Gpaa1,Gpam,Lpcat3,Hexb,Inppl1,Mvk,Pik3cd,Pip5k1c,Pip5k1b,Pld1,Pld2,Pign,Selenoi,Agpat5,Serinc1,Crls1,Tamm41,Hycc1,Lpcat4,Abhd4,Fdps,Mvd,Hmgcs1,Dgkb,Lclat1,Lpgat1,Ormdl1,Dgkd,Itpka,Lpcat2,Idi1,Dgkh	33/203
17_Member	Reactome Gene Sets	R-MMU-1483206	Glycerophospholipid biosynthesis	-2.7017	-1.50074	12891,14732,14792,18806,28042,52123,56018,66586,68682,70568,97212,99010,100434,105501,106861,225010,226856,231086,266692,270084	Cpne6,Gpam,Lpcat3,Pld2,Selenoi,Agpat5,Stard10,Crls1,Slc44a2,Cpne3,Hadha,Lpcat4,Slc44a1,Abhd4,Abhd3,Lclat1,Lpgat1,Hadhb,Cpne1,Lpcat2	20/115
18_Summary	GO Biological Processes	GO:0050803	regulation of synapse structure or activity	-15.0853	-12.5058	11418,11487,11816,12386,12564,13138,13169,13643,13838,13841,13844,14130,14735,16180,16412,18213,18223,18530,19164,19229,19268,19280,19655,19876,20563,20616,20617,20692,24088,26364,26416,26570,56376,66713,70530,72961,73728,74342,74762,75409,76108,80749,83433,107831,108100,108155,171171,216028,217480,223254,225875,226359,227580,228550,229715,233067,234267,235604,241263,241770,242384,243499,245450,2…	Asic2,Adam10,Apoe,Ctnna2,Cdh8,Dag1,Dbnl,Efnb3,Epha4,Epha7,Ephb2,Fcgr2b,Gpc4,Il1rap,Itgb1,Ntrk3,Numbl,Pcdh8,Psen1,Ptk2b,Ptprf,Ptprs,Rbmx,Robo1,Slit2,Snap91,Snca,Sparc,Tlr2,Adgre5,Mapk14,Slc7a11,Pdlim5,Actr2,Lrfn2,Slc17a7,Psd,Lrrtm1,Mdga1,Slitrk5,Rap2a,Lrfn1,Trem2,Adgrb1,Baiap2,Ogt,Ntng2,Lrrtm3,Dgkb,Farp1,Lrfn4,C1ql2,C1ql3,Itpka,Amigo1,Lrfn3,Gpm6a,Camkv,Gpr158,Rims4,Lingo2,Lrrtm4,Slitrk2,Nlgn3,Ephb…	94/-
18_Member	GO Biological Processes	GO:0050803	regulation of synapse structure or activity	-15.0853	-12.5058	11418,11487,11816,12386,12564,13138,13169,13643,13838,13841,13844,14130,14735,16180,16412,18213,18223,18530,19164,19229,19268,19280,19655,19876,20563,20616,20617,20692,24088,26364,26416,26570,56376,66713,70530,72961,73728,74342,74762,75409,76108,80749,83433,107831,108100,108155,171171,216028,217480,223254,225875,226359,227580,228550,229715,233067,234267,235604,241263,241770,242384,243499,245450,2…	Asic2,Adam10,Apoe,Ctnna2,Cdh8,Dag1,Dbnl,Efnb3,Epha4,Epha7,Ephb2,Fcgr2b,Gpc4,Il1rap,Itgb1,Ntrk3,Numbl,Pcdh8,Psen1,Ptk2b,Ptprf,Ptprs,Rbmx,Robo1,Slit2,Snap91,Snca,Sparc,Tlr2,Adgre5,Mapk14,Slc7a11,Pdlim5,Actr2,Lrfn2,Slc17a7,Psd,Lrrtm1,Mdga1,Slitrk5,Rap2a,Lrfn1,Trem2,Adgrb1,Baiap2,Ogt,Ntng2,Lrrtm3,Dgkb,Farp1,Lrfn4,C1ql2,C1ql3,Itpka,Amigo1,Lrfn3,Gpm6a,Camkv,Gpr158,Rims4,Lingo2,Lrrtm4,Slitrk2,Nlgn3,Ephb…	69/317
18_Member	GO Biological Processes	GO:0050807	regulation of synapse organization	-14.5779	-12.0576	11418,11487,11816,12386,12564,13138,13169,13643,13838,13841,13844,14130,14735,16180,16412,18213,18223,18530,19164,19229,19268,19280,19655,19876,20563,20616,20617,20692,24088,26364,26416,26570,56376,66713,70530,73728,74342,74762,75409,76108,80749,83433,107831,108100,108155,171171,216028,217480,223254,225875,226359,227580,228550,229715,233067,234267,235604,241263,241770,242384,243499,245450,245537,…	Asic2,Adam10,Apoe,Ctnna2,Cdh8,Dag1,Dbnl,Efnb3,Epha4,Epha7,Ephb2,Fcgr2b,Gpc4,Il1rap,Itgb1,Ntrk3,Numbl,Pcdh8,Psen1,Ptk2b,Ptprf,Ptprs,Rbmx,Robo1,Slit2,Snap91,Snca,Sparc,Tlr2,Adgre5,Mapk14,Slc7a11,Pdlim5,Actr2,Lrfn2,Psd,Lrrtm1,Mdga1,Slitrk5,Rap2a,Lrfn1,Trem2,Adgrb1,Baiap2,Ogt,Ntng2,Lrrtm3,Dgkb,Farp1,Lrfn4,C1ql2,C1ql3,Itpka,Amigo1,Lrfn3,Gpm6a,Camkv,Gpr158,Rims4,Lingo2,Lrrtm4,Slitrk2,Nlgn3,Ephb1,Negr1,…	67/309
18_Member	GO Biological Processes	GO:1901888	regulation of cell junction assembly	-14.3077	-11.8385	11418,11421,11606,11815,12737,13144,13643,13841,13844,14609,14735,16180,16456,17886,17913,18186,18213,18223,18606,19229,19280,19876,20563,20617,21838,22330,23790,24088,26364,29875,50768,56376,73728,74342,74762,75409,76089,76108,80749,94175,107831,108155,110829,171171,216028,223254,225875,226352,229715,233067,242384,243499,245450,245537,270190,320840,330814,331461	Asic2,Ace,Agt,Apod,Cldn1,Dapk3,Efnb3,Epha7,Ephb2,Gja1,Gpc4,Il1rap,F11r,Myh9,Myo1c,Nrp1,Ntrk3,Numbl,Enpp2,Ptk2b,Ptprs,Robo1,Slit2,Snca,Thy1,Vcl,Coro1c,Tlr2,Adgre5,Iqgap1,Dlc1,Pdlim5,Psd,Lrrtm1,Mdga1,Slitrk5,Rapgef2,Rap2a,Lrfn1,Hrg,Adgrb1,Ogt,Lims1,Ntng2,Lrrtm3,Farp1,Lrfn4,Epb41l5,Amigo1,Lrfn3,Lingo2,Lrrtm4,Slitrk2,Nlgn3,Ephb1,Negr1,Adgrl1,Il1rapl1	58/247
18_Member	GO Biological Processes	GO:0051963	regulation of synapse assembly	-11.2364	-9.09301	11418,13643,13841,13844,14735,16180,18213,18223,19229,19280,19876,20563,20617,24088,26364,56376,73728,74342,74762,75409,76108,80749,107831,108155,171171,216028,223254,225875,229715,233067,242384,243499,245450,245537,270190,320840,330814,331461	Asic2,Efnb3,Epha7,Ephb2,Gpc4,Il1rap,Ntrk3,Numbl,Ptk2b,Ptprs,Robo1,Slit2,Snca,Tlr2,Adgre5,Pdlim5,Psd,Lrrtm1,Mdga1,Slitrk5,Rap2a,Lrfn1,Adgrb1,Ogt,Ntng2,Lrrtm3,Farp1,Lrfn4,Amigo1,Lrfn3,Lingo2,Lrrtm4,Slitrk2,Nlgn3,Ephb1,Negr1,Adgrl1,Il1rapl1	38/144
18_Member	GO Biological Processes	GO:0099174	regulation of presynapse organization	-8.28534	-6.43962	13643,14735,16180,18213,20616,20617,74342,74762,75409,171171,216028,223254,225875,233067,245450,245537,331461	Efnb3,Gpc4,Il1rap,Ntrk3,Snap91,Snca,Lrrtm1,Mdga1,Slitrk5,Ntng2,Lrrtm3,Farp1,Lrfn4,Lrfn3,Slitrk2,Nlgn3,Il1rapl1	17/43
18_Member	GO Biological Processes	GO:1905606	regulation of presynapse assembly	-7.19169	-5.46756	13643,14735,16180,18213,20617,74342,74762,75409,171171,216028,223254,225875,233067,245450,331461	Efnb3,Gpc4,Il1rap,Ntrk3,Snca,Lrrtm1,Mdga1,Slitrk5,Ntng2,Lrrtm3,Farp1,Lrfn4,Lrfn3,Slitrk2,Il1rapl1	15/39
18_Member	GO Biological Processes	GO:1901890	positive regulation of cell junction assembly	-6.35015	-4.72795	11418,11606,12737,13844,16180,17886,18186,18213,18606,20563,21838,26364,29875,74342,75409,94175,107831,110829,216028,226352,229715,242384,243499,245450,245537,270190,330814,331461	Asic2,Agt,Cldn1,Ephb2,Il1rap,Myh9,Nrp1,Ntrk3,Enpp2,Slit2,Thy1,Adgre5,Iqgap1,Lrrtm1,Slitrk5,Hrg,Adgrb1,Lims1,Lrrtm3,Epb41l5,Amigo1,Lingo2,Lrrtm4,Slitrk2,Nlgn3,Ephb1,Adgrl1,Il1rapl1	28/131
18_Member	GO Biological Processes	GO:0099560	synaptic membrane adhesion	-5.18889	-3.73978	12565,14735,16180,19268,19280,54725,171171,225875,233067,245450,320873	Cdh9,Gpc4,Il1rap,Ptprf,Ptprs,Cadm1,Ntng2,Lrfn4,Lrfn3,Slitrk2,Cdh10	11/30
18_Member	GO Biological Processes	GO:0051965	positive regulation of synapse assembly	-4.47419	-3.15995	11418,13844,16180,18213,20563,26364,74342,75409,107831,216028,229715,242384,243499,245450,245537,270190,330814,331461	Asic2,Ephb2,Il1rap,Ntrk3,Slit2,Adgre5,Lrrtm1,Slitrk5,Adgrb1,Lrrtm3,Amigo1,Lingo2,Lrrtm4,Slitrk2,Nlgn3,Ephb1,Adgrl1,Il1rapl1	18/82
18_Member	Reactome Gene Sets	R-MMU-388844	Receptor-type tyrosine-protein phosphatases	-4.42236	-3.12071	16180,18213,19024,19268,19280,75409,76787,245450	Il1rap,Ntrk3,Ppfibp2,Ptprf,Ptprs,Slitrk5,Ppfia3,Slitrk2	8/19
19_Summary	GO Biological Processes	GO:0051668	localization within membrane	-14.9154	-12.1599	11512,11652,11816,11931,11933,12122,12295,12296,12297,12300,12306,12322,12492,13430,13483,14127,14130,14806,14809,14811,16414,16456,16668,16859,16897,16905,17913,18145,18164,18191,19092,19264,19326,19339,19340,19684,20533,20619,20907,20909,21838,22318,22342,22350,23969,27008,30055,53421,54376,55978,56322,56428,57743,57816,58244,65106,66333,66384,66460,67067,67295,67384,67457,68115,69683,69908,704…	Adcy6,Akt2,Apoe,Atp1b1,Atp1b3,Bid,Cacnb1,Cacnb2,Cacnb3,Cacng2,Anxa2,Camk2a,Scarb2,Dnm2,Dpp6,Fcer1g,Fcgr2b,Grik2,Grik5,Grin2a,Itgb2,F11r,Krt18,Lgals9,Llgl1,Lmna,Myo1c,Npc1,Nptx1,Nrxn3,Prkg2,Ptprc,Rab11b,Rab3a,Rab3d,Rdx,Slc4a1,Snap23,Stx1a,Stx4a,Thy1,Vamp2,Lin7b,Ezr,Pacsin1,Micall1,Timm13,Sec61a1,Cacng3,Ift20,Timm22,Mtch2,Sec61a2,Tesc,Stx6,Arl6ip5,Aqp11,Srp19,Sys1,Romo1,Rab3c,Bag4,Frmd8,Maip1,Emc10…	112/-
19_Member	GO Biological Processes	GO:0051668	localization within membrane	-14.9154	-12.1599	11512,11652,11816,11931,11933,12122,12295,12296,12297,12300,12306,12322,12492,13430,13483,14127,14130,14806,14809,14811,16414,16456,16668,16859,16897,16905,17913,18145,18164,18191,19092,19264,19326,19339,19340,19684,20533,20619,20907,20909,21838,22318,22342,22350,23969,27008,30055,53421,54376,55978,56322,56428,57743,57816,58244,65106,66333,66384,66460,67067,67295,67384,67457,68115,69683,69908,704…	Adcy6,Akt2,Apoe,Atp1b1,Atp1b3,Bid,Cacnb1,Cacnb2,Cacnb3,Cacng2,Anxa2,Camk2a,Scarb2,Dnm2,Dpp6,Fcer1g,Fcgr2b,Grik2,Grik5,Grin2a,Itgb2,F11r,Krt18,Lgals9,Llgl1,Lmna,Myo1c,Npc1,Nptx1,Nrxn3,Prkg2,Ptprc,Rab11b,Rab3a,Rab3d,Rdx,Slc4a1,Snap23,Stx1a,Stx4a,Thy1,Vamp2,Lin7b,Ezr,Pacsin1,Micall1,Timm13,Sec61a1,Cacng3,Ift20,Timm22,Mtch2,Sec61a2,Tesc,Stx6,Arl6ip5,Aqp11,Srp19,Sys1,Romo1,Rab3c,Bag4,Frmd8,Maip1,Emc10…	110/575
19_Member	GO Biological Processes	GO:0072657	protein localization to membrane	-14.142	-11.5346	11512,11652,11816,11931,11933,12122,12295,12296,12297,12300,12306,12492,13483,14127,14806,14809,14811,16414,16456,16668,16859,17913,18145,18164,18191,19092,19326,19339,19340,19684,20533,20619,20907,20909,21838,22318,22342,22350,23969,27008,30055,53421,54376,55978,56322,56428,57743,57816,65106,66333,66384,66460,67067,67295,67384,67457,68115,69683,69908,70423,72585,73340,74053,75608,75695,75788,759…	Adcy6,Akt2,Apoe,Atp1b1,Atp1b3,Bid,Cacnb1,Cacnb2,Cacnb3,Cacng2,Anxa2,Scarb2,Dpp6,Fcer1g,Grik2,Grik5,Grin2a,Itgb2,F11r,Krt18,Lgals9,Myo1c,Npc1,Nptx1,Nrxn3,Prkg2,Rab11b,Rab3a,Rab3d,Rdx,Slc4a1,Snap23,Stx1a,Stx4a,Thy1,Vamp2,Lin7b,Ezr,Pacsin1,Micall1,Timm13,Sec61a1,Cacng3,Ift20,Timm22,Mtch2,Sec61a2,Tesc,Arl6ip5,Aqp11,Srp19,Sys1,Romo1,Rab3c,Bag4,Frmd8,Maip1,Emc10,Rab3b,Tspan15,Lypd1,Nptxr,Grip1,Chmp4b,R…	98/498
19_Member	GO Biological Processes	GO:1990778	protein localization to cell periphery	-11.1334	-8.84118	11512,11652,11931,11933,12296,12297,12300,12306,12492,13483,14127,14811,16456,16668,18164,18191,19092,19339,19340,19684,20533,20619,20909,22318,22342,22350,23969,54376,55978,57816,65106,66460,67295,67384,67457,69908,70423,72585,73340,74053,75695,75788,76089,76108,76260,80334,84652,98741,98878,106572,192176,217124,226359,226422,227580,233651,235281,241263,241556,246317,259300,665113	Adcy6,Akt2,Atp1b1,Atp1b3,Cacnb2,Cacnb3,Cacng2,Anxa2,Scarb2,Dpp6,Fcer1g,Grin2a,F11r,Krt18,Nptx1,Nrxn3,Prkg2,Rab3a,Rab3d,Rdx,Slc4a1,Snap23,Stx4a,Vamp2,Lin7b,Ezr,Pacsin1,Cacng3,Ift20,Tesc,Arl6ip5,Sys1,Rab3c,Bag4,Frmd8,Rab3b,Tspan15,Lypd1,Nptxr,Grip1,Rilpl1,Smurf1,Rapgef2,Rap2a,Ttc8,Kcnip4,Hycc1,Kcnb2,Ehd4,Rab31,Flna,Ppp1r9b,C1ql2,Rab29,C1ql3,Dchs1,Scn3b,Gpr158,Tspan18,Neto1,Ehd2,Tnik	62/284
19_Member	GO Biological Processes	GO:0072659	protein localization to plasma membrane	-7.95906	-5.92108	11512,11652,11931,11933,12296,12297,12306,12492,13483,14127,16456,16668,19092,19339,19340,19684,20533,22318,22350,23969,55978,57816,65106,66460,67295,67384,67457,69908,70423,72585,74053,75695,75788,76089,76108,76260,80334,84652,98741,98878,106572,192176,233651,235281,241263,259300,665113	Adcy6,Akt2,Atp1b1,Atp1b3,Cacnb2,Cacnb3,Anxa2,Scarb2,Dpp6,Fcer1g,F11r,Krt18,Prkg2,Rab3a,Rab3d,Rdx,Slc4a1,Vamp2,Ezr,Pacsin1,Ift20,Tesc,Arl6ip5,Sys1,Rab3c,Bag4,Frmd8,Rab3b,Tspan15,Lypd1,Grip1,Rilpl1,Smurf1,Rapgef2,Rap2a,Ttc8,Kcnip4,Hycc1,Kcnb2,Ehd4,Rab31,Flna,Dchs1,Scn3b,Gpr158,Ehd2,Tnik	47/225
19_Member	GO Biological Processes	GO:0090150	establishment of protein localization to membrane	-4.55988	-2.96664	12122,12295,12300,12492,16668,17913,18145,19326,19684,20619,20909,22318,27008,30055,53421,56322,56428,57743,66333,66384,66460,67067,68115,69683,74053,75608,75695,75965,76438,85308,93742,106572,109880,216363,218544,225362,236792,330192	Bid,Cacnb1,Cacng2,Scarb2,Krt18,Myo1c,Npc1,Rab11b,Rdx,Snap23,Stx4a,Vamp2,Micall1,Timm13,Sec61a1,Timm22,Mtch2,Sec61a2,Aqp11,Srp19,Sys1,Romo1,Maip1,Emc10,Grip1,Chmp4b,Rilpl1,Zdhhc20,Rftn1,Emc9,Pard3,Rab31,Braf,Rab3ip,Sgtb,Reep2,Mmgt1,Vps37b	38/219
20_Summary	GO Biological Processes	GO:0043269	regulation of monoatomic ion transport	-14.8336	-12.0914	11418,11421,11517,11606,11652,11838,11840,11931,11932,11933,11941,12010,12018,12043,12288,12293,12295,12296,12297,12298,12322,12349,12512,13040,13167,13483,13830,13844,14061,14199,14226,14381,14609,14664,14811,15170,15444,15551,15894,16412,16498,16502,16513,16520,16573,16854,17096,17992,18439,18754,18854,19055,19056,19058,19092,19229,19326,20617,20720,20928,21838,22063,22068,22218,22629,26558,573…	Asic2,Ace,Adcyap1r1,Agt,Akt2,Arc,Arf1,Atp1b1,Atp1b2,Atp1b3,Atp2b2,B2m,Bak1,Bcl2,Cacna1c,Cacna2d1,Cacnb1,Cacnb2,Cacnb3,Cacnb4,Camk2a,Car2,Cd63,Ctss,Dbi,Dpp6,Stom,Ephb2,F2,Fhl1,Fkbp1b,G6pdx,Gja1,Slc6a9,Grin2a,Ptpn6,Hpca,Htr1b,Icam1,Itgb1,Kcnab2,Kcnc1,Kcnj10,Kcnj4,Kif5b,Lgals3,Lyn,Ndufa4,P2rx7,Prkce,Pml,Ppp3ca,Ppp3cb,Ppp3r1,Prkg2,Ptk2b,Rab11b,Snca,Serpine2,Abcc9,Thy1,Trpc1,Trpc6,Sumo1,Ywhah,Homer3,J…	132/-
20_Member	GO Biological Processes	GO:0043269	regulation of monoatomic ion transport	-14.8336	-12.0914	11418,11421,11517,11606,11652,11838,11840,11931,11932,11933,11941,12010,12018,12043,12288,12293,12295,12296,12297,12298,12322,12349,12512,13040,13167,13483,13830,13844,14061,14199,14226,14381,14609,14664,14811,15170,15444,15551,15894,16412,16498,16502,16513,16520,16573,16854,17096,17992,18439,18754,18854,19055,19056,19058,19092,19229,19326,20617,20720,20928,21838,22063,22068,22218,22629,26558,573…	Asic2,Ace,Adcyap1r1,Agt,Akt2,Arc,Arf1,Atp1b1,Atp1b2,Atp1b3,Atp2b2,B2m,Bak1,Bcl2,Cacna1c,Cacna2d1,Cacnb1,Cacnb2,Cacnb3,Cacnb4,Camk2a,Car2,Cd63,Ctss,Dbi,Dpp6,Stom,Ephb2,F2,Fhl1,Fkbp1b,G6pdx,Gja1,Slc6a9,Grin2a,Ptpn6,Hpca,Htr1b,Icam1,Itgb1,Kcnab2,Kcnc1,Kcnj10,Kcnj4,Kif5b,Lgals3,Lyn,Ndufa4,P2rx7,Prkce,Pml,Ppp3ca,Ppp3cb,Ppp3r1,Prkg2,Ptk2b,Rab11b,Snca,Serpine2,Abcc9,Thy1,Trpc1,Trpc6,Sumo1,Ywhah,Homer3,J…	102/516
20_Member	GO Biological Processes	GO:0034762	regulation of transmembrane transport	-14.2577	-11.6202	11418,11421,11517,11606,11652,11754,11838,11840,11847,11931,11932,11933,12018,12043,12266,12288,12293,12295,12296,12297,12298,12300,12349,12512,12671,13040,13167,13483,13830,13844,14061,14199,14226,14381,14599,14664,14811,15170,15277,15444,16367,16412,16498,16502,16513,16520,17096,17992,18000,18439,18605,18753,18754,18854,19055,19056,19058,19164,19229,20617,20912,20928,21825,21838,22063,22068,222…	Asic2,Ace,Adcyap1r1,Agt,Akt2,Aoc3,Arc,Arf1,Arg2,Atp1b1,Atp1b2,Atp1b3,Bak1,Bcl2,C3,Cacna1c,Cacna2d1,Cacnb1,Cacnb2,Cacnb3,Cacnb4,Cacng2,Car2,Cd63,Chrm3,Ctss,Dbi,Dpp6,Stom,Ephb2,F2,Fhl1,Fkbp1b,G6pdx,Gh,Slc6a9,Grin2a,Ptpn6,Hk2,Hpca,Irs1,Itgb1,Kcnab2,Kcnc1,Kcnj10,Kcnj4,Lyn,Ndufa4,Septin2,P2rx7,Enpp1,Prkcd,Prkce,Pml,Ppp3ca,Ppp3cb,Ppp3r1,Psen1,Ptk2b,Snca,Stxbp3,Abcc9,Thbs1,Thy1,Trpc1,Trpc6,Sumo1,Ywhah,C…	100/511
20_Member	GO Biological Processes	GO:0010959	regulation of metal ion transport	-11.9315	-9.69608	11421,11517,11606,11652,11840,11931,11933,11941,12010,12018,12043,12288,12293,12295,12296,12297,12298,12512,13167,13483,14061,14226,14381,14609,15170,15894,16412,16498,16502,16573,16854,17096,18439,18754,18854,19055,19056,19058,19229,20617,20720,20928,21838,22063,22068,22218,22629,26558,57340,57816,65973,67149,67972,70839,72821,74166,78688,80334,80708,83433,94253,98660,101118,105722,107589,114774…	Ace,Adcyap1r1,Agt,Akt2,Arf1,Atp1b1,Atp1b3,Atp2b2,B2m,Bak1,Bcl2,Cacna1c,Cacna2d1,Cacnb1,Cacnb2,Cacnb3,Cacnb4,Cd63,Dbi,Dpp6,F2,Fkbp1b,G6pdx,Gja1,Ptpn6,Icam1,Itgb1,Kcnab2,Kcnc1,Kif5b,Lgals3,Lyn,P2rx7,Prkce,Pml,Ppp3ca,Ppp3cb,Ppp3r1,Ptk2b,Snca,Serpine2,Abcc9,Thy1,Trpc1,Trpc6,Sumo1,Ywhah,Homer3,Jph3,Tesc,Asph,Nkain1,Atp2b1,P2ry12,Scn2b,Tmem38a,Nol3,Kcnip4,Pacsin3,Trem2,Hecw1,Atp1a2,Tmem168,Ano6,Mylk,Pa…	77/431
20_Member	GO Biological Processes	GO:0034765	regulation of monoatomic ion transmembrane transport	-10.5399	-8.29626	11418,11517,11838,11840,11931,11932,11933,12018,12043,12288,12293,12295,12296,12297,12298,12512,13040,13167,13483,13830,13844,14061,14199,14226,14381,14664,14811,15170,15444,16412,16498,16502,16513,16520,17096,17992,18439,18754,18854,19055,19056,19058,19229,20617,20928,21838,22063,22068,22218,22629,57340,57816,65973,72821,74166,78688,80334,83433,94253,98660,101118,105722,108071,192176,223864,2297…	Asic2,Adcyap1r1,Arc,Arf1,Atp1b1,Atp1b2,Atp1b3,Bak1,Bcl2,Cacna1c,Cacna2d1,Cacnb1,Cacnb2,Cacnb3,Cacnb4,Cd63,Ctss,Dbi,Dpp6,Stom,Ephb2,F2,Fhl1,Fkbp1b,G6pdx,Slc6a9,Grin2a,Ptpn6,Hpca,Itgb1,Kcnab2,Kcnc1,Kcnj10,Kcnj4,Lyn,Ndufa4,P2rx7,Prkce,Pml,Ppp3ca,Ppp3cb,Ppp3r1,Ptk2b,Snca,Abcc9,Thy1,Trpc1,Trpc6,Sumo1,Ywhah,Jph3,Tesc,Asph,Scn2b,Tmem38a,Nol3,Kcnip4,Trem2,Hecw1,Atp1a2,Tmem168,Ano6,Grm5,Flna,Rapgef3,Amigo…	72/366
20_Member	GO Biological Processes	GO:1904062	regulation of monoatomic cation transmembrane transport	-8.11383	-6.28289	11517,11840,11931,11933,12018,12043,12288,12293,12295,12296,12297,12298,12512,13040,13167,13483,14061,14226,14381,15170,16412,16498,16502,17096,17992,18439,18754,18854,19055,19056,19058,19229,20617,20928,21838,22063,22218,22629,57340,57816,65973,72821,74166,78688,80334,83433,94253,98660,101118,105722,192176,223864,229715,235281,246317,545622	Adcyap1r1,Arf1,Atp1b1,Atp1b3,Bak1,Bcl2,Cacna1c,Cacna2d1,Cacnb1,Cacnb2,Cacnb3,Cacnb4,Cd63,Ctss,Dbi,Dpp6,F2,Fkbp1b,G6pdx,Ptpn6,Itgb1,Kcnab2,Kcnc1,Lyn,Ndufa4,P2rx7,Prkce,Pml,Ppp3ca,Ppp3cb,Ppp3r1,Ptk2b,Snca,Abcc9,Thy1,Trpc1,Sumo1,Ywhah,Jph3,Tesc,Asph,Scn2b,Tmem38a,Nol3,Kcnip4,Trem2,Hecw1,Atp1a2,Tmem168,Ano6,Flna,Rapgef3,Amigo1,Scn3b,Neto1,Ptpn3	56/328
20_Member	GO Biological Processes	GO:0051924	regulation of calcium ion transport	-8.0735	-6.25214	11421,11517,11606,11931,11941,12018,12043,12288,12293,12295,12296,12297,12298,13167,14061,14226,14381,14609,15170,15894,16854,17096,18439,18754,18854,19055,19056,19058,19229,20617,21838,22063,22068,22218,26558,57340,65973,67972,70839,74166,78688,80708,98660,107589,114774,214585,216869,223864,241556,319984	Ace,Adcyap1r1,Agt,Atp1b1,Atp2b2,Bak1,Bcl2,Cacna1c,Cacna2d1,Cacnb1,Cacnb2,Cacnb3,Cacnb4,Dbi,F2,Fkbp1b,G6pdx,Gja1,Ptpn6,Icam1,Lgals3,Lyn,P2rx7,Prkce,Pml,Ppp3ca,Ppp3cb,Ppp3r1,Ptk2b,Snca,Thy1,Trpc1,Trpc6,Sumo1,Homer3,Jph3,Asph,Atp2b1,P2ry12,Tmem38a,Nol3,Pacsin3,Atp1a2,Mylk,Pawr,Spg11,Arrb2,Rapgef3,Tspan18,Jph4	50/278
20_Member	GO Biological Processes	GO:0034764	positive regulation of transmembrane transport	-7.27418	-5.53724	11517,11606,11652,11754,11840,11931,11933,12018,12266,12288,12296,12349,13040,13167,13483,13844,14061,14381,14599,16367,16412,16502,17992,18439,19055,19056,19058,19164,20617,21838,22063,22068,22218,23830,26416,57816,65973,83433,105722,109880,192176,223864,229715,245537	Adcyap1r1,Agt,Akt2,Aoc3,Arf1,Atp1b1,Atp1b3,Bak1,C3,Cacna1c,Cacnb2,Car2,Ctss,Dbi,Dpp6,Ephb2,F2,G6pdx,Gh,Irs1,Itgb1,Kcnc1,Ndufa4,P2rx7,Ppp3ca,Ppp3cb,Ppp3r1,Psen1,Snca,Thy1,Trpc1,Trpc6,Sumo1,Capn10,Mapk14,Tesc,Asph,Trem2,Ano6,Braf,Flna,Rapgef3,Amigo1,Nlgn3	44/243
20_Member	GO Biological Processes	GO:0043270	positive regulation of monoatomic ion transport	-6.16989	-4.34695	11517,11652,11838,11840,11931,11932,11933,11941,12018,12288,12296,12322,13040,13167,13483,13844,14061,14199,14381,16502,16573,16854,17992,18439,19055,19056,19058,20617,21838,22063,22068,22218,57816,65973,67972,70839,83433,105722,107589,192176,216869,223864,229715,235281,245537	Adcyap1r1,Akt2,Arc,Arf1,Atp1b1,Atp1b2,Atp1b3,Atp2b2,Bak1,Cacna1c,Cacnb2,Camk2a,Ctss,Dbi,Dpp6,Ephb2,F2,Fhl1,G6pdx,Kcnc1,Kif5b,Lgals3,Ndufa4,P2rx7,Ppp3ca,Ppp3cb,Ppp3r1,Snca,Thy1,Trpc1,Trpc6,Sumo1,Tesc,Asph,Atp2b1,P2ry12,Trem2,Ano6,Mylk,Flna,Arrb2,Rapgef3,Amigo1,Scn3b,Nlgn3	45/241
20_Member	GO Biological Processes	GO:0034767	positive regulation of monoatomic ion transmembrane transport	-5.90977	-4.34368	11517,11840,11931,11933,12018,12288,12296,13040,13167,13483,13844,14061,14381,16502,17992,18439,19055,19056,19058,20617,21838,22063,22068,22218,57816,65973,83433,105722,192176,223864,229715,245537	Adcyap1r1,Arf1,Atp1b1,Atp1b3,Bak1,Cacna1c,Cacnb2,Ctss,Dbi,Dpp6,Ephb2,F2,G6pdx,Kcnc1,Ndufa4,P2rx7,Ppp3ca,Ppp3cb,Ppp3r1,Snca,Thy1,Trpc1,Trpc6,Sumo1,Tesc,Asph,Trem2,Ano6,Flna,Rapgef3,Amigo1,Nlgn3	32/169
20_Member	GO Biological Processes	GO:1903169	regulation of calcium ion transmembrane transport	-5.53015	-4.02686	11517,11931,12018,12043,12288,12293,12295,12296,12297,12298,13167,14061,14226,14381,15170,17096,18439,18754,18854,19055,19056,19058,19229,20617,21838,22063,22218,57340,65973,74166,78688,98660,223864	Adcyap1r1,Atp1b1,Bak1,Bcl2,Cacna1c,Cacna2d1,Cacnb1,Cacnb2,Cacnb3,Cacnb4,Dbi,F2,Fkbp1b,G6pdx,Ptpn6,Lyn,P2rx7,Prkce,Pml,Ppp3ca,Ppp3cb,Ppp3r1,Ptk2b,Snca,Thy1,Trpc1,Sumo1,Jph3,Asph,Tmem38a,Nol3,Atp1a2,Rapgef3	33/184
20_Member	GO Biological Processes	GO:1904064	positive regulation of cation transmembrane transport	-4.96162	-3.55463	11517,11840,11931,11933,12018,12288,12296,13040,13167,13483,14061,14381,16502,18439,19055,19056,19058,20617,21838,22063,22218,57816,65973,83433,105722,192176,223864,229715	Adcyap1r1,Arf1,Atp1b1,Atp1b3,Bak1,Cacna1c,Cacnb2,Ctss,Dbi,Dpp6,F2,G6pdx,Kcnc1,P2rx7,Ppp3ca,Ppp3cb,Ppp3r1,Snca,Thy1,Trpc1,Sumo1,Tesc,Asph,Trem2,Ano6,Flna,Rapgef3,Amigo1	28/153
20_Member	GO Biological Processes	GO:0051928	positive regulation of calcium ion transport	-3.98016	-2.7545	11517,11931,11941,12018,12288,12296,13167,14061,14381,16854,18439,19055,19056,19058,20617,21838,22063,22068,22218,65973,67972,107589,216869,223864	Adcyap1r1,Atp1b1,Atp2b2,Bak1,Cacna1c,Cacnb2,Dbi,F2,G6pdx,Lgals3,P2rx7,Ppp3ca,Ppp3cb,Ppp3r1,Snca,Thy1,Trpc1,Trpc6,Sumo1,Asph,Atp2b1,Mylk,Arrb2,Rapgef3	24/138
20_Member	GO Biological Processes	GO:1904427	positive regulation of calcium ion transmembrane transport	-3.54585	-2.41616	11517,11931,12018,12288,12296,13167,14061,14381,18439,19055,19056,19058,20617,21838,22063,22218,65973,223864	Adcyap1r1,Atp1b1,Bak1,Cacna1c,Cacnb2,Dbi,F2,G6pdx,P2rx7,Ppp3ca,Ppp3cb,Ppp3r1,Snca,Thy1,Trpc1,Sumo1,Asph,Rapgef3	18/96
20_Member	GO Biological Processes	GO:0051282	regulation of sequestering of calcium ion	-3.11487	-2.08602	13167,14061,14226,15170,16439,17096,18439,18754,18797,18799,19229,19264,20617,21838,22063,28240,56384,57340,65973,74166,78688,192176	Dbi,F2,Fkbp1b,Ptpn6,Itpr2,Lyn,P2rx7,Prkce,Plcb3,Plcd1,Ptk2b,Ptprc,Snca,Thy1,Trpc1,Trpm2,Letm1,Jph3,Asph,Tmem38a,Nol3,Flna	22/139
20_Member	GO Biological Processes	GO:0051279	regulation of release of sequestered calcium ion into cytosol	-2.53845	-1.66044	13167,14061,14226,15170,17096,18754,19229,20617,21838,22063,57340,65973,74166,78688	Dbi,F2,Fkbp1b,Ptpn6,Lyn,Prkce,Ptk2b,Snca,Thy1,Trpc1,Jph3,Asph,Tmem38a,Nol3	14/81
