# Supplementary material for: PKD1-tau disulfide linkage promotes tau phosphorylation and tau accumulation in a tauopathy mouse model
Source: Research Square preprint supplement (doi:10.21203/rs.3.rs-7655539/v1), 2025-10-13
Supplement: Supplementary file 2 [file 3e364fb6b70322e7b80ddf7b.xlsx]

## Sheet: Table S8
GroupID	Category	Term	Description	LogP	Log(q-value)	Genes	Symbols	InTerm_InList
1_Summary	GO Biological Processes	GO:0098609	cell-cell adhesion	-28.6551	-24.3102	460,960,961,1007,1008,1192,1266,1465,1495,1956,2239,3383,3611,3655,3684,3687,3688,3689,3693,3987,4359,4478,5100,5341,5365,5777,5792,6282,6814,7070,7094,7412,7430,7535,9369,9414,10458,10611,23022,23396,23654,23657,57463,78999,83706,84966,253559,257194	ASTN1,CD44,CD47,CDH9,CDH10,CLIC1,CNN3,CSRP1,CTNNA1,EGFR,GPC4,ICAM1,ILK,ITGA6,ITGAM,ITGAX,ITGB1,ITGB2,ITGB5,LIMS1,MPZ,MSN,PCDH8,PLEK,PLXNB3,PTPN6,PTPRF,S100A11,STXBP3,THY1,TLN1,VCAM1,EZR,ZAP70,NRXN3,TJP2,BAIAP2,PDLIM5,PALLD,PIP5K1C,PLXNB2,SLC7A11,AMIGO1,LRFN4,FERMT3,IGSF21,CADM2,NEGR1	48/-
1_Member	GO Biological Processes	GO:0098609	cell-cell adhesion	-28.6551	-24.3102	460,960,961,1007,1008,1192,1266,1465,1495,1956,2239,3383,3611,3655,3684,3687,3688,3689,3693,3987,4359,4478,5100,5341,5365,5777,5792,6282,6814,7070,7094,7412,7430,7535,9369,9414,10458,10611,23022,23396,23654,23657,57463,78999,83706,84966,253559,257194	ASTN1,CD44,CD47,CDH9,CDH10,CLIC1,CNN3,CSRP1,CTNNA1,EGFR,GPC4,ICAM1,ILK,ITGA6,ITGAM,ITGAX,ITGB1,ITGB2,ITGB5,LIMS1,MPZ,MSN,PCDH8,PLEK,PLXNB3,PTPN6,PTPRF,S100A11,STXBP3,THY1,TLN1,VCAM1,EZR,ZAP70,NRXN3,TJP2,BAIAP2,PDLIM5,PALLD,PIP5K1C,PLXNB2,SLC7A11,AMIGO1,LRFN4,FERMT3,IGSF21,CADM2,NEGR1	48/542
1_Member	GO Biological Processes	GO:0098742	cell-cell adhesion via plasma-membrane adhesion molecules	-9.1772	-6.70153	1007,1008,2239,3383,3684,3688,3689,4359,5100,5365,5792,7412,23022,23654,57463,78999,84966,253559	CDH9,CDH10,GPC4,ICAM1,ITGAM,ITGB1,ITGB2,MPZ,PCDH8,PLXNB3,PTPRF,VCAM1,PALLD,PLXNB2,AMIGO1,LRFN4,IGSF21,CADM2	18/261
1_Member	GO Biological Processes	GO:0007156	homophilic cell adhesion via plasma membrane adhesion molecules	-4.81639	-3.0432	1007,1008,3688,5100,5365,23022,23654,57463,84966,253559	CDH9,CDH10,ITGB1,PCDH8,PLXNB3,PALLD,PLXNB2,AMIGO1,IGSF21,CADM2	10/167
2_Summary	GO Biological Processes	GO:0034330	cell junction organization	-24.0189	-19.9751	348,784,1007,1008,1495,2043,2239,2697,2890,3655,3684,3706,3987,5364,5792,5864,6622,7070,7094,7430,8541,8927,9253,9362,9414,10160,10804,11346,22891,23396,23544,23607,23654,26059,27445,56288,78999,79778,80208,80863,84966,389941,729956	APOE,CACNB3,CDH9,CDH10,CTNNA1,EPHA4,GPC4,GJA1,GRIA1,ITGA6,ITGAM,ITPKA,LIMS1,PLXNB1,PTPRF,RAB3A,SNCA,THY1,TLN1,EZR,PPFIA3,BSN,NUMBL,CPNE6,TJP2,FARP1,GJB6,SYNPO,ZNF365,PIP5K1C,SEZ6L,CD2AP,PLXNB2,ERC2,PCLO,PARD3,LRFN4,MICALL2,SPG11,PRRT1,IGSF21,C1QL3,SHISA7	43/-
2_Member	GO Biological Processes	GO:0034330	cell junction organization	-24.0189	-19.9751	348,784,1007,1008,1495,2043,2239,2697,2890,3655,3684,3706,3987,5364,5792,5864,6622,7070,7094,7430,8541,8927,9253,9362,9414,10160,10804,11346,22891,23396,23544,23607,23654,26059,27445,56288,78999,79778,80208,80863,84966,389941,729956	APOE,CACNB3,CDH9,CDH10,CTNNA1,EPHA4,GPC4,GJA1,GRIA1,ITGA6,ITGAM,ITPKA,LIMS1,PLXNB1,PTPRF,RAB3A,SNCA,THY1,TLN1,EZR,PPFIA3,BSN,NUMBL,CPNE6,TJP2,FARP1,GJB6,SYNPO,ZNF365,PIP5K1C,SEZ6L,CD2AP,PLXNB2,ERC2,PCLO,PARD3,LRFN4,MICALL2,SPG11,PRRT1,IGSF21,C1QL3,SHISA7	43/533
2_Member	GO Biological Processes	GO:0050808	synapse organization	-19.0063	-15.4738	348,784,1007,1008,2043,2239,2890,3684,3706,5364,5792,5864,6622,7430,8541,8927,9362,10160,11346,22891,23544,23607,23654,26059,27445,78999,80208,80863,84966,389941,729956	APOE,CACNB3,CDH9,CDH10,EPHA4,GPC4,GRIA1,ITGAM,ITPKA,PLXNB1,PTPRF,RAB3A,SNCA,EZR,PPFIA3,BSN,CPNE6,FARP1,SYNPO,ZNF365,SEZ6L,CD2AP,PLXNB2,ERC2,PCLO,LRFN4,SPG11,PRRT1,IGSF21,C1QL3,SHISA7	31/337
3_Summary	GO Biological Processes	GO:0060627	regulation of vesicle-mediated transport	-20.4128	-16.545	348,929,961,977,1191,1794,3071,3684,3689,3958,3965,4067,4478,5338,5530,5532,5538,5864,5962,6622,6804,6814,6857,7430,8927,9892,10814,11031,22895,22999,26059,27445,29108,29763,55589,57118,91683,196527,376267	APOE,CD14,CD47,CD151,CLU,DOCK2,NCKAP1L,ITGAM,ITGB2,LGALS3,LGALS9,LYN,MSN,PLD2,PPP3CA,PPP3CB,PPT1,RAB3A,RDX,SNCA,STX1A,STXBP3,SYT1,EZR,BSN,SNAP91,CPLX2,RAB31,RPH3A,RIMS1,ERC2,PCLO,PYCARD,PACSIN3,BMP2K,CAMK1D,SYT12,ANO6,RAB15	39/-
3_Member	GO Biological Processes	GO:0060627	regulation of vesicle-mediated transport	-20.4128	-16.545	348,929,961,977,1191,1794,3071,3684,3689,3958,3965,4067,4478,5338,5530,5532,5538,5864,5962,6622,6804,6814,6857,7430,8927,9892,10814,11031,22895,22999,26059,27445,29108,29763,55589,57118,91683,196527,376267	APOE,CD14,CD47,CD151,CLU,DOCK2,NCKAP1L,ITGAM,ITGB2,LGALS3,LGALS9,LYN,MSN,PLD2,PPP3CA,PPP3CB,PPT1,RAB3A,RDX,SNCA,STX1A,STXBP3,SYT1,EZR,BSN,SNAP91,CPLX2,RAB31,RPH3A,RIMS1,ERC2,PCLO,PYCARD,PACSIN3,BMP2K,CAMK1D,SYT12,ANO6,RAB15	39/528
3_Member	GO Biological Processes	GO:0030100	regulation of endocytosis	-9.25426	-6.77268	348,929,961,977,1191,1794,3071,3958,5530,5532,5538,6622,9892,11031,29108,29763,55589,57118,196527	APOE,CD14,CD47,CD151,CLU,DOCK2,NCKAP1L,LGALS3,PPP3CA,PPP3CB,PPT1,SNCA,SNAP91,RAB31,PYCARD,PACSIN3,BMP2K,CAMK1D,ANO6	19/291
3_Member	GO Biological Processes	GO:0045807	positive regulation of endocytosis	-8.76958	-6.37407	348,929,961,977,1191,1794,3071,5530,5538,6622,11031,29108,57118,196527	APOE,CD14,CD47,CD151,CLU,DOCK2,NCKAP1L,PPP3CA,PPT1,SNCA,RAB31,PYCARD,CAMK1D,ANO6	14/155
3_Member	GO Biological Processes	GO:0050766	positive regulation of phagocytosis	-4.87906	-3.08925	961,1794,3071,11031,29108,57118,196527	CD47,DOCK2,NCKAP1L,RAB31,PYCARD,CAMK1D,ANO6	7/72
3_Member	GO Biological Processes	GO:0050764	regulation of phagocytosis	-3.95513	-2.3475	961,1794,3071,11031,29108,57118,196527	CD47,DOCK2,NCKAP1L,RAB31,PYCARD,CAMK1D,ANO6	7/100
3_Member	GO Biological Processes	GO:0060100	positive regulation of phagocytosis, engulfment	-3.47869	-1.95792	3071,11031,196527	NCKAP1L,RAB31,ANO6	3/13
3_Member	GO Biological Processes	GO:1905155	positive regulation of membrane invagination	-3.47869	-1.95792	3071,11031,196527	NCKAP1L,RAB31,ANO6	3/13
3_Member	GO Biological Processes	GO:0060099	regulation of phagocytosis, engulfment	-3.28403	-1.81027	3071,11031,196527	NCKAP1L,RAB31,ANO6	3/15
3_Member	GO Biological Processes	GO:1905153	regulation of membrane invagination	-3.28403	-1.81027	3071,11031,196527	NCKAP1L,RAB31,ANO6	3/15
4_Summary	GO Biological Processes	GO:0001775	cell activation	-19.6535	-15.9107	199,960,977,1191,1192,1465,1794,1947,1956,2697,2896,3383,3430,3611,3684,3688,3689,3716,3936,4064,4067,4478,4853,5052,5270,5341,5530,5532,5777,6622,6774,6814,6868,7094,7409,7412,7535,8773,10672,10814,23607,23657,29108,83706,2317,2633,3687,3965,4790,4904,5720,5721,6285,6804,7706,25939,57506,2739,3071,6237,8879,9444,57326,135228	AIF1,CD44,CD151,CLU,CLIC1,CSRP1,DOCK2,EFNB1,EGFR,GJA1,GRN,ICAM1,IFI35,ILK,ITGAM,ITGB1,ITGB2,JAK1,LCP1,CD180,LYN,MSN,NOTCH2,PRDX1,SERPINE2,PLEK,PPP3CA,PPP3CB,PTPN6,SNCA,STAT3,STXBP3,ADAM17,TLN1,VAV1,VCAM1,ZAP70,SNAP23,GNA13,CPLX2,CD2AP,SLC7A11,PYCARD,FERMT3,FLNB,GBP1,ITGAX,LGALS9,NFKB1,YBX1,PSME1,PSME2,S100B,STX1A,TRIM25,SAMHD1,MAVS,GLO1,NCKAP1L,RRAS,SGPL1,QKI,PBXIP1,CD109	64/-
4_Member	GO Biological Processes	GO:0001775	cell activation	-19.6535	-15.9107	199,960,977,1191,1192,1465,1794,1947,1956,2697,2896,3383,3430,3611,3684,3688,3689,3716,3936,4064,4067,4478,4853,5052,5270,5341,5530,5532,5777,6622,6774,6814,6868,7094,7409,7412,7535,8773,10672,10814,23607,23657,29108,83706	AIF1,CD44,CD151,CLU,CLIC1,CSRP1,DOCK2,EFNB1,EGFR,GJA1,GRN,ICAM1,IFI35,ILK,ITGAM,ITGB1,ITGB2,JAK1,LCP1,CD180,LYN,MSN,NOTCH2,PRDX1,SERPINE2,PLEK,PPP3CA,PPP3CB,PTPN6,SNCA,STAT3,STXBP3,ADAM17,TLN1,VAV1,VCAM1,ZAP70,SNAP23,GNA13,CPLX2,CD2AP,SLC7A11,PYCARD,FERMT3	44/726
4_Member	GO Biological Processes	GO:0045321	leukocyte activation	-14.3369	-11.39	199,960,977,1191,1794,1947,2697,2896,3383,3430,3684,3688,3689,3716,3936,4064,4067,4478,4853,5052,5530,5532,5777,6622,6774,6814,6868,7409,7412,7535,8773,10814,23607,29108	AIF1,CD44,CD151,CLU,DOCK2,EFNB1,GJA1,GRN,ICAM1,IFI35,ITGAM,ITGB1,ITGB2,JAK1,LCP1,CD180,LYN,MSN,NOTCH2,PRDX1,PPP3CA,PPP3CB,PTPN6,SNCA,STAT3,STXBP3,ADAM17,VAV1,VCAM1,ZAP70,SNAP23,CPLX2,CD2AP,PYCARD	34/601
4_Member	Reactome Gene Sets	R-HSA-1280215	Cytokine Signaling in Immune system	-7.92878	-5.64078	960,2317,2633,3383,3430,3684,3687,3688,3689,3716,3936,3965,4067,4478,4790,4904,5720,5721,5777,6285,6622,6774,6804,6868,7409,7412,7706,25939,57506	CD44,FLNB,GBP1,ICAM1,IFI35,ITGAM,ITGAX,ITGB1,ITGB2,JAK1,LCP1,LGALS9,LYN,MSN,NFKB1,YBX1,PSME1,PSME2,PTPN6,S100B,SNCA,STAT3,STX1A,ADAM17,VAV1,VCAM1,TRIM25,SAMHD1,MAVS	29/786
4_Member	GO Biological Processes	GO:0046649	lymphocyte activation	-7.79325	-5.51653	960,977,1794,1947,2697,3383,3688,3716,3936,4064,4478,4853,5052,5530,5532,5777,6774,6868,7409,7412,7535,23607	CD44,CD151,DOCK2,EFNB1,GJA1,ICAM1,ITGB1,JAK1,LCP1,CD180,MSN,NOTCH2,PRDX1,PPP3CA,PPP3CB,PTPN6,STAT3,ADAM17,VAV1,VCAM1,ZAP70,CD2AP	22/478
4_Member	GO Biological Processes	GO:0042110	T cell activation	-6.33123	-4.28299	960,977,1794,1947,2697,3383,3716,3936,4478,5530,5532,5777,6774,6868,7409,7535	CD44,CD151,DOCK2,EFNB1,GJA1,ICAM1,JAK1,LCP1,MSN,PPP3CA,PPP3CB,PTPN6,STAT3,ADAM17,VAV1,ZAP70	16/318
4_Member	Reactome Gene Sets	R-HSA-449147	Signaling by Interleukins	-5.91501	-3.94706	3383,3684,3687,3688,3689,3716,3936,3965,4067,4478,4790,5720,5721,5777,6285,6774,6804,7409,7412	ICAM1,ITGAM,ITGAX,ITGB1,ITGB2,JAK1,LCP1,LGALS9,LYN,MSN,NFKB1,PSME1,PSME2,PTPN6,S100B,STAT3,STX1A,VAV1,VCAM1	19/473
4_Member	GO Biological Processes	GO:0030097	hemopoiesis	-4.18873	-2.53668	1794,2739,3071,3688,3716,4067,4853,5341,5532,5777,6237,6774,6868,7409,7412,7535,8879,9444,57326,135228	DOCK2,GLO1,NCKAP1L,ITGB1,JAK1,LYN,NOTCH2,PLEK,PPP3CB,PTPN6,RRAS,STAT3,ADAM17,VAV1,VCAM1,ZAP70,SGPL1,QKI,PBXIP1,CD109	20/683
4_Member	GO Biological Processes	GO:0002521	leukocyte differentiation	-4.17157	-2.52171	1794,2739,3688,3716,4067,4853,5532,6237,6774,6868,7409,7412,7535,9444,135228	DOCK2,GLO1,ITGB1,JAK1,LYN,NOTCH2,PPP3CB,RRAS,STAT3,ADAM17,VAV1,VCAM1,ZAP70,QKI,CD109	15/423
4_Member	GO Biological Processes	GO:1903131	mononuclear cell differentiation	-2.9777	-1.57331	1794,3688,3716,4067,4853,5532,6774,6868,7409,7412,7535	DOCK2,ITGB1,JAK1,LYN,NOTCH2,PPP3CB,STAT3,ADAM17,VAV1,VCAM1,ZAP70	11/331
4_Member	GO Biological Processes	GO:0030098	lymphocyte differentiation	-2.88475	-1.50505	1794,3688,3716,4853,5532,6774,6868,7409,7412,7535	DOCK2,ITGB1,JAK1,NOTCH2,PPP3CB,STAT3,ADAM17,VAV1,VCAM1,ZAP70	10/289
4_Member	GO Biological Processes	GO:0030217	T cell differentiation	-2.43091	-1.15419	1794,3716,5532,6774,6868,7409,7535	DOCK2,JAK1,PPP3CB,STAT3,ADAM17,VAV1,ZAP70	7/181
5_Summary	GO Biological Processes	GO:0000902	cell morphogenesis	-19.038	-15.4738	107,1007,1008,1191,1605,1947,1956,2043,2317,2596,3071,3611,3688,3996,4650,4853,5364,5530,5532,5777,5864,6285,6507,6868,8408,8826,9253,9369,10160,10413,10458,22891,23022,51299,56288,57463,80208,81565,81622,81628,90249,219699,348,1495,4067,5792,9693,23154,79778,85300,257194,349667,1465,2318,5239,11076,10611,2697,4534,23168	ADCY1,CDH9,CDH10,CLU,DAG1,EFNB1,EGFR,EPHA4,FLNB,GAP43,NCKAP1L,ILK,ITGB1,LLGL1,MYO9B,NOTCH2,PLXNB1,PPP3CA,PPP3CB,PTPN6,RAB3A,S100B,SLC1A3,ADAM17,ULK1,IQGAP1,NUMBL,NRXN3,FARP1,YAP1,BAIAP2,ZNF365,PALLD,NRN1,PARD3,AMIGO1,SPG11,NDEL1,UNC93B1,TSC22D4,UNC5A,UNC5B,APOE,CTNNA1,LYN,PTPRF,RAPGEF2,NCDN,MICALL2,ATCAY,NEGR1,RTN4RL2,CSRP1,FLNC,PGM5,TPPP,PDLIM5,GJA1,MTM1,RTF1	60/-
5_Member	GO Biological Processes	GO:0000902	cell morphogenesis	-19.038	-15.4738	107,1007,1008,1191,1605,1947,1956,2043,2317,2596,3071,3611,3688,3996,4650,4853,5364,5530,5532,5777,5864,6285,6507,6868,8408,8826,9253,9369,10160,10413,10458,22891,23022,51299,56288,57463,80208,81565,81622,81628,90249,219699	ADCY1,CDH9,CDH10,CLU,DAG1,EFNB1,EGFR,EPHA4,FLNB,GAP43,NCKAP1L,ILK,ITGB1,LLGL1,MYO9B,NOTCH2,PLXNB1,PPP3CA,PPP3CB,PTPN6,RAB3A,S100B,SLC1A3,ADAM17,ULK1,IQGAP1,NUMBL,NRXN3,FARP1,YAP1,BAIAP2,ZNF365,PALLD,NRN1,PARD3,AMIGO1,SPG11,NDEL1,UNC93B1,TSC22D4,UNC5A,UNC5B	42/681
5_Member	GO Biological Processes	GO:0031175	neuron projection development	-18.8049	-15.3631	107,348,1495,1605,1947,1956,2043,2596,3071,3688,3996,4067,4853,5364,5530,5532,5792,5864,6285,6868,8408,8826,9253,9369,9693,10160,10458,22891,23022,23154,51299,56288,57463,79778,80208,81565,81628,85300,90249,219699,257194,349667	ADCY1,APOE,CTNNA1,DAG1,EFNB1,EGFR,EPHA4,GAP43,NCKAP1L,ITGB1,LLGL1,LYN,NOTCH2,PLXNB1,PPP3CA,PPP3CB,PTPRF,RAB3A,S100B,ADAM17,ULK1,IQGAP1,NUMBL,NRXN3,RAPGEF2,FARP1,BAIAP2,ZNF365,PALLD,NCDN,NRN1,PARD3,AMIGO1,MICALL2,SPG11,NDEL1,TSC22D4,ATCAY,UNC5A,UNC5B,NEGR1,RTN4RL2	42/691
5_Member	GO Biological Processes	GO:0032989	cellular anatomical entity morphogenesis	-16.6655	-13.4345	107,1465,1605,1947,1956,2043,2318,2596,3071,3688,3996,4650,4853,5239,5364,5530,5532,5864,6285,6868,8408,8826,9253,9369,10160,10458,11076,22891,23022,51299,56288,57463,80208,81565,81628,90249,219699	ADCY1,CSRP1,DAG1,EFNB1,EGFR,EPHA4,FLNC,GAP43,NCKAP1L,ITGB1,LLGL1,MYO9B,NOTCH2,PGM5,PLXNB1,PPP3CA,PPP3CB,RAB3A,S100B,ADAM17,ULK1,IQGAP1,NUMBL,NRXN3,FARP1,BAIAP2,TPPP,ZNF365,PALLD,NRN1,PARD3,AMIGO1,SPG11,NDEL1,TSC22D4,UNC5A,UNC5B	37/605
5_Member	GO Biological Processes	GO:0120039	plasma membrane bounded cell projection morphogenesis	-16.1374	-12.9685	107,1605,1947,1956,2043,2596,3071,3688,3996,4650,4853,5364,5530,5532,5864,6285,6868,8408,8826,9253,9369,10160,10458,22891,23022,51299,56288,57463,80208,81565,81628,90249,219699	ADCY1,DAG1,EFNB1,EGFR,EPHA4,GAP43,NCKAP1L,ITGB1,LLGL1,MYO9B,NOTCH2,PLXNB1,PPP3CA,PPP3CB,RAB3A,S100B,ADAM17,ULK1,IQGAP1,NUMBL,NRXN3,FARP1,BAIAP2,ZNF365,PALLD,NRN1,PARD3,AMIGO1,SPG11,NDEL1,TSC22D4,UNC5A,UNC5B	33/489
5_Member	GO Biological Processes	GO:0048858	cell projection morphogenesis	-16.0075	-12.8667	107,1605,1947,1956,2043,2596,3071,3688,3996,4650,4853,5364,5530,5532,5864,6285,6868,8408,8826,9253,9369,10160,10458,22891,23022,51299,56288,57463,80208,81565,81628,90249,219699	ADCY1,DAG1,EFNB1,EGFR,EPHA4,GAP43,NCKAP1L,ITGB1,LLGL1,MYO9B,NOTCH2,PLXNB1,PPP3CA,PPP3CB,RAB3A,S100B,ADAM17,ULK1,IQGAP1,NUMBL,NRXN3,FARP1,BAIAP2,ZNF365,PALLD,NRN1,PARD3,AMIGO1,SPG11,NDEL1,TSC22D4,UNC5A,UNC5B	33/494
5_Member	GO Biological Processes	GO:0048812	neuron projection morphogenesis	-15.4045	-12.3606	107,1605,1947,1956,2043,2596,3071,3688,3996,4853,5364,5530,5532,5864,6285,6868,8408,8826,9253,9369,10160,10458,22891,23022,51299,56288,57463,80208,81565,81628,90249,219699	ADCY1,DAG1,EFNB1,EGFR,EPHA4,GAP43,NCKAP1L,ITGB1,LLGL1,NOTCH2,PLXNB1,PPP3CA,PPP3CB,RAB3A,S100B,ADAM17,ULK1,IQGAP1,NUMBL,NRXN3,FARP1,BAIAP2,ZNF365,PALLD,NRN1,PARD3,AMIGO1,SPG11,NDEL1,TSC22D4,UNC5A,UNC5B	32/484
5_Member	GO Biological Processes	GO:0048667	cell morphogenesis involved in neuron differentiation	-12.2904	-9.56877	107,1605,1947,2043,2596,3688,3996,4853,5530,5532,5864,6285,6507,6868,8408,9253,9369,10160,10458,22891,23022,56288,57463,80208,81565,90249,219699	ADCY1,DAG1,EFNB1,EPHA4,GAP43,ITGB1,LLGL1,NOTCH2,PPP3CA,PPP3CB,RAB3A,S100B,SLC1A3,ADAM17,ULK1,NUMBL,NRXN3,FARP1,BAIAP2,ZNF365,PALLD,PARD3,AMIGO1,SPG11,NDEL1,UNC5A,UNC5B	27/440
5_Member	GO Biological Processes	GO:0061564	axon development	-11.1057	-8.45977	107,1495,1605,1947,2043,2596,3688,3996,4853,5532,5864,6285,6868,8408,9253,9369,10458,23022,56288,57463,80208,81565,90249,219699,349667	ADCY1,CTNNA1,DAG1,EFNB1,EPHA4,GAP43,ITGB1,LLGL1,NOTCH2,PPP3CB,RAB3A,S100B,ADAM17,ULK1,NUMBL,NRXN3,BAIAP2,PALLD,PARD3,AMIGO1,SPG11,NDEL1,UNC5A,UNC5B,RTN4RL2	25/421
5_Member	GO Biological Processes	GO:0007409	axonogenesis	-10.7507	-8.14619	107,1605,1947,2043,2596,3688,3996,4853,5532,5864,6285,6868,8408,9253,9369,10458,23022,56288,57463,80208,81565,90249,219699	ADCY1,DAG1,EFNB1,EPHA4,GAP43,ITGB1,LLGL1,NOTCH2,PPP3CB,RAB3A,S100B,ADAM17,ULK1,NUMBL,NRXN3,BAIAP2,PALLD,PARD3,AMIGO1,SPG11,NDEL1,UNC5A,UNC5B	23/366
5_Member	GO Biological Processes	GO:1990138	neuron projection extension	-6.66364	-4.57881	3688,5532,6285,8408,8826,51299,80208,81565,81628	ITGB1,PPP3CB,S100B,ULK1,IQGAP1,NRN1,SPG11,NDEL1,TSC22D4	9/80
5_Member	GO Biological Processes	GO:0048588	developmental cell growth	-6.34818	-4.29774	3688,5532,6285,8408,8826,10611,51299,80208,81565,81628	ITGB1,PPP3CB,S100B,ULK1,IQGAP1,PDLIM5,NRN1,SPG11,NDEL1,TSC22D4	10/113
5_Member	GO Biological Processes	GO:0016049	cell growth	-6.27708	-4.24815	3688,5532,6285,8408,8826,10611,51299,80208,81565,81628	ITGB1,PPP3CB,S100B,ULK1,IQGAP1,PDLIM5,NRN1,SPG11,NDEL1,TSC22D4	10/115
5_Member	GO Biological Processes	GO:0040007	growth	-5.97256	-3.98938	1605,2596,2697,3688,4534,4853,5530,5532,6285,8408,8826,10413,10611,23168,51299,80208,81565,81628	DAG1,GAP43,GJA1,ITGB1,MTM1,NOTCH2,PPP3CA,PPP3CB,S100B,ULK1,IQGAP1,YAP1,PDLIM5,RTF1,NRN1,SPG11,NDEL1,TSC22D4	18/424
5_Member	GO Biological Processes	GO:0048589	developmental growth	-5.97256	-3.98938	1605,2596,2697,3688,4534,4853,5530,5532,6285,8408,8826,10413,10611,23168,51299,80208,81565,81628	DAG1,GAP43,GJA1,ITGB1,MTM1,NOTCH2,PPP3CA,PPP3CB,S100B,ULK1,IQGAP1,YAP1,PDLIM5,RTF1,NRN1,SPG11,NDEL1,TSC22D4	18/424
5_Member	GO Biological Processes	GO:0060560	developmental growth involved in morphogenesis	-5.57916	-3.67986	3688,5532,6285,8408,8826,10413,51299,80208,81565,81628	ITGB1,PPP3CB,S100B,ULK1,IQGAP1,YAP1,NRN1,SPG11,NDEL1,TSC22D4	10/137
5_Member	GO Biological Processes	GO:0007411	axon guidance	-3.72939	-2.16119	1605,1947,2043,2596,4853,6868,9369,23022,90249,219699	DAG1,EFNB1,EPHA4,GAP43,NOTCH2,ADAM17,NRXN3,PALLD,UNC5A,UNC5B	10/225
5_Member	GO Biological Processes	GO:0097485	neuron projection guidance	-3.72939	-2.16119	1605,1947,2043,2596,4853,6868,9369,23022,90249,219699	DAG1,EFNB1,EPHA4,GAP43,NOTCH2,ADAM17,NRXN3,PALLD,UNC5A,UNC5B	10/225
6_Summary	GO Biological Processes	GO:0030029	actin filament-based process	-18.9736	-15.4738	199,781,822,1266,1465,1794,2037,2317,2318,2697,2934,3071,3688,3693,3706,3936,3996,4641,4650,5239,5341,6327,7094,7430,8572,8826,9362,9444,9639,10095,10160,10458,10611,23022,23396,23607,51225,79778,79784,116985,871,4534,6622,11076,81565,121441	AIF1,CACNA2D1,CAPG,CNN3,CSRP1,DOCK2,EPB41L2,FLNB,FLNC,GJA1,GSN,NCKAP1L,ITGB1,ITGB5,ITPKA,LCP1,LLGL1,MYO1C,MYO9B,PGM5,PLEK,SCN2B,TLN1,EZR,PDLIM4,IQGAP1,CPNE6,QKI,ARHGEF10,ARPC1B,FARP1,BAIAP2,PDLIM5,PALLD,PIP5K1C,CD2AP,ABI3,MICALL2,MYH14,ARAP1,SERPINH1,MTM1,SNCA,TPPP,NDEL1,NEDD1	46/-
6_Member	GO Biological Processes	GO:0030029	actin filament-based process	-18.9736	-15.4738	199,781,822,1266,1465,1794,2037,2317,2318,2697,2934,3071,3688,3693,3706,3936,3996,4641,4650,5239,5341,6327,7094,7430,8572,8826,9362,9444,9639,10095,10160,10458,10611,23022,23396,23607,51225,79778,79784,116985	AIF1,CACNA2D1,CAPG,CNN3,CSRP1,DOCK2,EPB41L2,FLNB,FLNC,GJA1,GSN,NCKAP1L,ITGB1,ITGB5,ITPKA,LCP1,LLGL1,MYO1C,MYO9B,PGM5,PLEK,SCN2B,TLN1,EZR,PDLIM4,IQGAP1,CPNE6,QKI,ARHGEF10,ARPC1B,FARP1,BAIAP2,PDLIM5,PALLD,PIP5K1C,CD2AP,ABI3,MICALL2,MYH14,ARAP1	40/614
6_Member	GO Biological Processes	GO:0030036	actin cytoskeleton organization	-16.4544	-13.2556	199,822,1266,1465,1794,2037,2317,2318,2934,3071,3688,3693,3706,3936,3996,4641,5239,5341,7094,7430,8572,8826,9362,9639,10095,10160,10458,10611,23022,23396,23607,51225,79778,79784,116985	AIF1,CAPG,CNN3,CSRP1,DOCK2,EPB41L2,FLNB,FLNC,GSN,NCKAP1L,ITGB1,ITGB5,ITPKA,LCP1,LLGL1,MYO1C,PGM5,PLEK,TLN1,EZR,PDLIM4,IQGAP1,CPNE6,ARHGEF10,ARPC1B,FARP1,BAIAP2,PDLIM5,PALLD,PIP5K1C,CD2AP,ABI3,MICALL2,MYH14,ARAP1	35/544
6_Member	GO Biological Processes	GO:0097435	supramolecular fiber organization	-7.40123	-5.19305	199,822,871,1266,1465,2318,2934,3688,3693,3936,4534,4641,5239,6622,7430,8826,10095,10458,11076,23607,79778,81565,116985,121441	AIF1,CAPG,SERPINH1,CNN3,CSRP1,FLNC,GSN,ITGB1,ITGB5,LCP1,MTM1,MYO1C,PGM5,SNCA,EZR,IQGAP1,ARPC1B,BAIAP2,TPPP,CD2AP,MICALL2,NDEL1,ARAP1,NEDD1	24/592
6_Member	GO Biological Processes	GO:0007015	actin filament organization	-5.59894	-3.69337	199,822,1266,2934,3693,3936,4641,7430,8826,10095,10458,23607,79778,116985	AIF1,CAPG,CNN3,GSN,ITGB5,LCP1,MYO1C,EZR,IQGAP1,ARPC1B,BAIAP2,CD2AP,MICALL2,ARAP1	14/279
7_Summary	GO Biological Processes	GO:0099537	trans-synaptic signaling	-17.7408	-14.3502	348,747,784,1131,1605,2890,2891,4359,5100,5530,5538,5864,6327,6507,6622,6804,6814,6857,8541,8572,8773,8927,10160,10814,22895,22999,23396,23504,26059,27445,63908,80208,91683,534,535,5338,6455,9892,10947,477,55117,4067,5341,5532,11031,490,2697,3996,4547,5270,10991,93145,760,1956,3071,3684,3689,3965,4129,23607,64285,79751,376267,3383,4478,7412,7430,1212,3688,5360,23657,1181,4790,8879	APOE,DAGLA,CACNB3,CHRM3,DAG1,GRIA1,GRIA2,MPZ,PCDH8,PPP3CA,PPT1,RAB3A,SCN2B,SLC1A3,SNCA,STX1A,STXBP3,SYT1,PPFIA3,PDLIM4,SNAP23,BSN,FARP1,CPLX2,RPH3A,RIMS1,PIP5K1C,RIMBP2,ERC2,PCLO,NAPB,SPG11,SYT12,ATP6V1G2,ATP6V0A1,PLD2,SH3GL1,SNAP91,AP3M2,ATP1A2,SLC6A15,LYN,PLEK,PPP3CB,RAB31,ATP2B1,GJA1,LLGL1,MTTP,SERPINE2,SLC38A3,OLFM2,CA2,EGFR,NCKAP1L,ITGAM,ITGB2,LGALS9,MAOB,CD2AP,RHBDF1,SLC25A22,RAB15,ICAM1,MS…	74/-
7_Member	GO Biological Processes	GO:0099537	trans-synaptic signaling	-17.7408	-14.3502	348,747,784,1131,1605,2890,2891,4359,5100,5530,5538,5864,6327,6507,6622,6804,6814,6857,8541,8572,8773,8927,10160,10814,22895,22999,23396,23504,26059,27445,63908,80208,91683	APOE,DAGLA,CACNB3,CHRM3,DAG1,GRIA1,GRIA2,MPZ,PCDH8,PPP3CA,PPT1,RAB3A,SCN2B,SLC1A3,SNCA,STX1A,STXBP3,SYT1,PPFIA3,PDLIM4,SNAP23,BSN,FARP1,CPLX2,RPH3A,RIMS1,PIP5K1C,RIMBP2,ERC2,PCLO,NAPB,SPG11,SYT12	33/432
7_Member	GO Biological Processes	GO:0099536	synaptic signaling	-16.8955	-13.6118	348,747,784,1131,1605,2890,2891,4359,5100,5530,5538,5864,6327,6507,6622,6804,6814,6857,8541,8572,8773,8927,10160,10814,22895,22999,23396,23504,26059,27445,63908,80208,91683	APOE,DAGLA,CACNB3,CHRM3,DAG1,GRIA1,GRIA2,MPZ,PCDH8,PPP3CA,PPT1,RAB3A,SCN2B,SLC1A3,SNCA,STX1A,STXBP3,SYT1,PPFIA3,PDLIM4,SNAP23,BSN,FARP1,CPLX2,RPH3A,RIMS1,PIP5K1C,RIMBP2,ERC2,PCLO,NAPB,SPG11,SYT12	33/461
7_Member	GO Biological Processes	GO:0099504	synaptic vesicle cycle	-15.9665	-12.852	534,535,5338,5864,6455,6622,6804,6857,8541,8773,8927,9892,10814,10947,22895,22999,23396,26059,27445,91683	ATP6V1G2,ATP6V0A1,PLD2,RAB3A,SH3GL1,SNCA,STX1A,SYT1,PPFIA3,SNAP23,BSN,SNAP91,CPLX2,AP3M2,RPH3A,RIMS1,PIP5K1C,ERC2,PCLO,SYT12	20/143
7_Member	GO Biological Processes	GO:0007268	chemical synaptic transmission	-15.5054	-12.4392	348,784,1131,2890,2891,4359,5100,5530,5538,5864,6327,6507,6622,6804,6814,6857,8541,8572,8773,8927,10814,22895,22999,23396,23504,26059,27445,63908,80208,91683	APOE,CACNB3,CHRM3,GRIA1,GRIA2,MPZ,PCDH8,PPP3CA,PPT1,RAB3A,SCN2B,SLC1A3,SNCA,STX1A,STXBP3,SYT1,PPFIA3,PDLIM4,SNAP23,BSN,CPLX2,RPH3A,RIMS1,PIP5K1C,RIMBP2,ERC2,PCLO,NAPB,SPG11,SYT12	30/415
7_Member	GO Biological Processes	GO:0098916	anterograde trans-synaptic signaling	-15.5054	-12.4392	348,784,1131,2890,2891,4359,5100,5530,5538,5864,6327,6507,6622,6804,6814,6857,8541,8572,8773,8927,10814,22895,22999,23396,23504,26059,27445,63908,80208,91683	APOE,CACNB3,CHRM3,GRIA1,GRIA2,MPZ,PCDH8,PPP3CA,PPT1,RAB3A,SCN2B,SLC1A3,SNCA,STX1A,STXBP3,SYT1,PPFIA3,PDLIM4,SNAP23,BSN,CPLX2,RPH3A,RIMS1,PIP5K1C,RIMBP2,ERC2,PCLO,NAPB,SPG11,SYT12	30/415
7_Member	GO Biological Processes	GO:0099003	vesicle-mediated transport in synapse	-15.3803	-12.3576	534,535,5338,5864,6455,6622,6804,6857,8541,8773,8927,9892,10814,10947,22895,22999,23396,26059,27445,91683	ATP6V1G2,ATP6V0A1,PLD2,RAB3A,SH3GL1,SNCA,STX1A,SYT1,PPFIA3,SNAP23,BSN,SNAP91,CPLX2,AP3M2,RPH3A,RIMS1,PIP5K1C,ERC2,PCLO,SYT12	20/153
7_Member	GO Biological Processes	GO:0006836	neurotransmitter transport	-13.7692	-10.8714	477,5538,5864,6507,6622,6804,6814,6857,8541,8773,10814,22895,22999,23396,26059,27445,55117,91683	ATP1A2,PPT1,RAB3A,SLC1A3,SNCA,STX1A,STXBP3,SYT1,PPFIA3,SNAP23,CPLX2,RPH3A,RIMS1,PIP5K1C,ERC2,PCLO,SLC6A15,SYT12	18/140
7_Member	GO Biological Processes	GO:0045055	regulated exocytosis	-13.5515	-10.6837	4067,5341,5532,5864,6622,6804,6814,6857,8541,8773,10814,11031,22895,22999,23396,26059,27445,91683	LYN,PLEK,PPP3CB,RAB3A,SNCA,STX1A,STXBP3,SYT1,PPFIA3,SNAP23,CPLX2,RAB31,RPH3A,RIMS1,PIP5K1C,ERC2,PCLO,SYT12	18/144
7_Member	GO Biological Processes	GO:0007269	neurotransmitter secretion	-13.5043	-10.6732	5538,5864,6622,6804,6814,6857,8541,8773,10814,22895,22999,23396,26059,27445,91683	PPT1,RAB3A,SNCA,STX1A,STXBP3,SYT1,PPFIA3,SNAP23,CPLX2,RPH3A,RIMS1,PIP5K1C,ERC2,PCLO,SYT12	15/87
7_Member	GO Biological Processes	GO:0099643	signal release from synapse	-13.5043	-10.6732	5538,5864,6622,6804,6814,6857,8541,8773,10814,22895,22999,23396,26059,27445,91683	PPT1,RAB3A,SNCA,STX1A,STXBP3,SYT1,PPFIA3,SNAP23,CPLX2,RPH3A,RIMS1,PIP5K1C,ERC2,PCLO,SYT12	15/87
7_Member	GO Biological Processes	GO:0016079	synaptic vesicle exocytosis	-12.8441	-10.079	5864,6622,6804,6857,8541,8773,10814,22895,22999,23396,26059,27445,91683	RAB3A,SNCA,STX1A,SYT1,PPFIA3,SNAP23,CPLX2,RPH3A,RIMS1,PIP5K1C,ERC2,PCLO,SYT12	13/63
7_Member	GO Biological Processes	GO:0140352	export from cell	-11.4928	-8.81068	477,490,2697,3996,4067,4547,5270,5341,5532,5538,5864,6622,6804,6814,6857,8541,8773,10814,10991,11031,22895,22999,23396,26059,27445,91683,93145	ATP1A2,ATP2B1,GJA1,LLGL1,LYN,MTTP,SERPINE2,PLEK,PPP3CB,PPT1,RAB3A,SNCA,STX1A,STXBP3,SYT1,PPFIA3,SNAP23,CPLX2,SLC38A3,RAB31,RPH3A,RIMS1,PIP5K1C,ERC2,PCLO,SYT12,OLFM2	27/476
7_Member	GO Biological Processes	GO:0032940	secretion by cell	-11.3093	-8.65462	2697,3996,4067,4547,5270,5341,5532,5538,5864,6622,6804,6814,6857,8541,8773,10814,10991,11031,22895,22999,23396,26059,27445,91683,93145	GJA1,LLGL1,LYN,MTTP,SERPINE2,PLEK,PPP3CB,PPT1,RAB3A,SNCA,STX1A,STXBP3,SYT1,PPFIA3,SNAP23,CPLX2,SLC38A3,RAB31,RPH3A,RIMS1,PIP5K1C,ERC2,PCLO,SYT12,OLFM2	25/412
7_Member	GO Biological Processes	GO:0006887	exocytosis	-10.8123	-8.19983	3996,4067,5341,5532,5864,6622,6804,6814,6857,8541,8773,10814,11031,22895,22999,23396,26059,27445,91683	LLGL1,LYN,PLEK,PPP3CB,RAB3A,SNCA,STX1A,STXBP3,SYT1,PPFIA3,SNAP23,CPLX2,RAB31,RPH3A,RIMS1,PIP5K1C,ERC2,PCLO,SYT12	19/236
7_Member	GO Biological Processes	GO:0046903	secretion	-10.4453	-7.8563	760,1131,2697,3996,4067,4547,5270,5341,5532,5538,5864,6622,6804,6814,6857,8541,8773,10814,10991,11031,22895,22999,23396,26059,27445,91683,93145	CA2,CHRM3,GJA1,LLGL1,LYN,MTTP,SERPINE2,PLEK,PPP3CB,PPT1,RAB3A,SNCA,STX1A,STXBP3,SYT1,PPFIA3,SNAP23,CPLX2,SLC38A3,RAB31,RPH3A,RIMS1,PIP5K1C,ERC2,PCLO,SYT12,OLFM2	27/529
7_Member	GO Biological Processes	GO:1903530	regulation of secretion by cell	-9.78937	-7.27054	348,1131,1956,2697,3071,3684,3689,3965,3996,4067,4129,5530,5532,5864,6622,6804,6814,6857,10814,22895,22999,23607,27445,64285,79751,91683,376267	APOE,CHRM3,EGFR,GJA1,NCKAP1L,ITGAM,ITGB2,LGALS9,LLGL1,LYN,MAOB,PPP3CA,PPP3CB,RAB3A,SNCA,STX1A,STXBP3,SYT1,CPLX2,RPH3A,RIMS1,CD2AP,PCLO,RHBDF1,SLC25A22,SYT12,RAB15	27/566
7_Member	GO Biological Processes	GO:0140029	exocytic process	-9.7448	-7.23241	4067,5341,5864,6622,6804,6814,8541,8773,10814,22895,26059	LYN,PLEK,RAB3A,SNCA,STX1A,STXBP3,PPFIA3,SNAP23,CPLX2,RPH3A,ERC2	11/68
7_Member	GO Biological Processes	GO:0023061	signal release	-9.58714	-7.08733	4067,5538,5864,6622,6804,6814,6857,8541,8773,10814,22895,22999,23396,26059,27445,91683	LYN,PPT1,RAB3A,SNCA,STX1A,STXBP3,SYT1,PPFIA3,SNAP23,CPLX2,RPH3A,RIMS1,PIP5K1C,ERC2,PCLO,SYT12	16/187
7_Member	GO Biological Processes	GO:0017157	regulation of exocytosis	-9.55274	-7.05909	3071,3684,3689,3965,4067,5864,6622,6804,6814,6857,10814,22895,22999,27445,91683,376267	NCKAP1L,ITGAM,ITGB2,LGALS9,LYN,RAB3A,SNCA,STX1A,STXBP3,SYT1,CPLX2,RPH3A,RIMS1,PCLO,SYT12,RAB15	16/188
7_Member	GO Biological Processes	GO:1903305	regulation of regulated secretory pathway	-8.93993	-6.50884	3071,3684,3689,3965,4067,5864,6804,6814,6857,22895,22999,91683,376267	NCKAP1L,ITGAM,ITGB2,LGALS9,LYN,RAB3A,STX1A,STXBP3,SYT1,RPH3A,RIMS1,SYT12,RAB15	13/125
7_Member	GO Biological Processes	GO:0051046	regulation of secretion	-8.90976	-6.48913	348,1131,1956,2697,3071,3684,3689,3965,3996,4067,4129,5530,5532,5864,6622,6804,6814,6857,10814,22895,22999,23607,27445,64285,79751,91683,376267	APOE,CHRM3,EGFR,GJA1,NCKAP1L,ITGAM,ITGB2,LGALS9,LLGL1,LYN,MAOB,PPP3CA,PPP3CB,RAB3A,SNCA,STX1A,STXBP3,SYT1,CPLX2,RPH3A,RIMS1,CD2AP,PCLO,RHBDF1,SLC25A22,SYT12,RAB15	27/621
7_Member	GO Biological Processes	GO:0022406	membrane docking	-8.35133	-6.01927	3383,4478,5341,5864,6804,6814,6857,7412,7430,8541,10814	ICAM1,MSN,PLEK,RAB3A,STX1A,STXBP3,SYT1,VCAM1,EZR,PPFIA3,CPLX2	11/91
7_Member	KEGG Pathway	hsa04721	Synaptic vesicle cycle	-6.75976	-4.65541	534,535,1212,5864,6507,6804,6857,10814,22999	ATP6V1G2,ATP6V0A1,CLTB,RAB3A,SLC1A3,STX1A,SYT1,CPLX2,RIMS1	9/78
7_Member	Reactome Gene Sets	R-HSA-210500	Glutamate Neurotransmitter Release Cycle	-6.75441	-4.65255	5864,6507,6804,6857,8541,22999	RAB3A,SLC1A3,STX1A,SYT1,PPFIA3,RIMS1	6/24
7_Member	Reactome Gene Sets	R-HSA-264642	Acetylcholine Neurotransmitter Release Cycle	-6.09492	-4.0921	5864,6804,6857,8541,22999	RAB3A,STX1A,SYT1,PPFIA3,RIMS1	5/17
7_Member	Reactome Gene Sets	R-HSA-181429	Serotonin Neurotransmitter Release Cycle	-5.95746	-3.98331	5864,6804,6857,8541,22999	RAB3A,STX1A,SYT1,PPFIA3,RIMS1	5/18
7_Member	Reactome Gene Sets	R-HSA-181430	Norepinephrine Neurotransmitter Release Cycle	-5.95746	-3.98331	5864,6804,6857,8541,22999	RAB3A,STX1A,SYT1,PPFIA3,RIMS1	5/18
7_Member	WikiPathways	WP2267	Synaptic vesicle pathway	-5.89926	-3.94706	477,5864,6507,6804,6857,10814,22999	ATP1A2,RAB3A,SLC1A3,STX1A,SYT1,CPLX2,RIMS1	7/51
7_Member	GO Biological Processes	GO:0017158	regulation of calcium ion-dependent exocytosis	-5.42928	-3.54527	5864,6804,6814,6857,22895,91683	RAB3A,STX1A,STXBP3,SYT1,RPH3A,SYT12	6/39
7_Member	Reactome Gene Sets	R-HSA-212676	Dopamine Neurotransmitter Release Cycle	-5.38269	-3.51086	5864,6804,6857,8541,22999	RAB3A,STX1A,SYT1,PPFIA3,RIMS1	5/23
7_Member	GO Biological Processes	GO:0048278	vesicle docking	-5.26821	-3.41746	5341,5864,6804,6814,6857,8541,10814	PLEK,RAB3A,STX1A,STXBP3,SYT1,PPFIA3,CPLX2	7/63
7_Member	GO Biological Processes	GO:1903307	positive regulation of regulated secretory pathway	-5.17358	-3.34056	3684,3689,5864,6804,6857,376267	ITGAM,ITGB2,RAB3A,STX1A,SYT1,RAB15	6/43
7_Member	GO Biological Processes	GO:0051588	regulation of neurotransmitter transport	-4.89783	-3.1007	477,3688,5864,6622,6804,6857,10814,22999	ATP1A2,ITGB1,RAB3A,SNCA,STX1A,SYT1,CPLX2,RIMS1	8/99
7_Member	GO Biological Processes	GO:0017156	calcium-ion regulated exocytosis	-4.88951	-3.09606	5532,5864,6804,6857,22999,91683	PPP3CB,RAB3A,STX1A,SYT1,RIMS1,SYT12	6/48
7_Member	Reactome Gene Sets	R-HSA-112310	Neurotransmitter release cycle	-4.73475	-2.97531	5864,6507,6804,6857,8541,22999	RAB3A,SLC1A3,STX1A,SYT1,PPFIA3,RIMS1	6/51
7_Member	GO Biological Processes	GO:0045921	positive regulation of exocytosis	-4.68627	-2.94452	3684,3689,5864,6622,6804,6857,376267	ITGAM,ITGB2,RAB3A,SNCA,STX1A,SYT1,RAB15	7/77
7_Member	GO Biological Processes	GO:0042886	amide transport	-4.65871	-2.92019	2697,4547,5360,5864,6804,6814,10991,23657,27445	GJA1,MTTP,PLTP,RAB3A,STX1A,STXBP3,SLC38A3,SLC7A11,PCLO	9/139
7_Member	GO Biological Processes	GO:0140056	organelle localization by membrane tethering	-4.54216	-2.8328	5341,5864,6804,6814,6857,8541,10814	PLEK,RAB3A,STX1A,STXBP3,SYT1,PPFIA3,CPLX2	7/81
7_Member	Reactome Gene Sets	R-HSA-888590	GABA synthesis, release, reuptake and degradation	-4.33684	-2.65779	5864,6804,6857,22999	RAB3A,STX1A,SYT1,RIMS1	4/19
7_Member	GO Biological Processes	GO:0006904	vesicle docking involved in exocytosis	-4.10431	-2.46783	5341,5864,6814,8541,10814	PLEK,RAB3A,STXBP3,PPFIA3,CPLX2	5/41
7_Member	GO Biological Processes	GO:0051047	positive regulation of secretion	-3.77002	-2.19301	1131,1956,3684,3689,5530,5532,5864,6622,6804,6857,23607,376267	CHRM3,EGFR,ITGAM,ITGB2,PPP3CA,PPP3CB,RAB3A,SNCA,STX1A,SYT1,CD2AP,RAB15	12/312
7_Member	GO Biological Processes	GO:0046928	regulation of neurotransmitter secretion	-3.56797	-2.02376	5864,6622,6804,6857,10814,22999	RAB3A,SNCA,STX1A,SYT1,CPLX2,RIMS1	6/82
7_Member	GO Biological Processes	GO:1903532	positive regulation of secretion by cell	-3.47632	-1.9562	1131,1956,3684,3689,5532,5864,6622,6804,6857,23607,376267	CHRM3,EGFR,ITGAM,ITGB2,PPP3CB,RAB3A,SNCA,STX1A,SYT1,CD2AP,RAB15	11/288
7_Member	GO Biological Processes	GO:0009306	protein secretion	-3.39983	-1.89691	4547,5341,5864,6804,6814,27445,93145	MTTP,PLEK,RAB3A,STX1A,STXBP3,PCLO,OLFM2	7/123
7_Member	GO Biological Processes	GO:0035592	establishment of protein localization to extracellular region	-3.37858	-1.8795	4547,5341,5864,6804,6814,27445,93145	MTTP,PLEK,RAB3A,STX1A,STXBP3,PCLO,OLFM2	7/124
7_Member	GO Biological Processes	GO:0046879	hormone secretion	-3.29831	-1.82146	4067,5864,6804,6814,8773,27445	LYN,RAB3A,STX1A,STXBP3,SNAP23,PCLO	6/92
7_Member	GO Biological Processes	GO:0071692	protein localization to extracellular region	-3.21575	-1.7618	4547,5341,5864,6804,6814,27445,93145	MTTP,PLEK,RAB3A,STX1A,STXBP3,PCLO,OLFM2	7/132
7_Member	GO Biological Processes	GO:0015833	peptide transport	-3.19999	-1.74841	2697,5864,6804,6814,23657,27445	GJA1,RAB3A,STX1A,STXBP3,SLC7A11,PCLO	6/96
7_Member	GO Biological Processes	GO:0010817	regulation of hormone levels	-3.0552	-1.62833	1131,1181,1956,2697,4067,4790,5530,5532,5864,6804,6814,8773,8879,27445,79751	CHRM3,CLCN2,EGFR,GJA1,LYN,NFKB1,PPP3CA,PPP3CB,RAB3A,STX1A,STXBP3,SNAP23,SGPL1,PCLO,SLC25A22	15/539
7_Member	GO Biological Processes	GO:0009914	hormone transport	-3.03917	-1.62113	4067,5864,6804,6814,8773,27445	LYN,RAB3A,STX1A,STXBP3,SNAP23,PCLO	6/103
7_Member	GO Biological Processes	GO:0030073	insulin secretion	-2.74331	-1.39449	5864,6804,6814,27445	RAB3A,STX1A,STXBP3,PCLO	4/48
7_Member	GO Biological Processes	GO:0030072	peptide hormone secretion	-2.12911	-0.922263	5864,6804,6814,27445	RAB3A,STX1A,STXBP3,PCLO	4/71
7_Member	GO Biological Processes	GO:0002790	peptide secretion	-2.0666	-0.868029	5864,6804,6814,27445	RAB3A,STX1A,STXBP3,PCLO	4/74
8_Summary	GO Biological Processes	GO:0050804	modulation of chemical synaptic transmission	-16.9043	-13.6118	107,348,477,760,1605,1956,2043,2890,2891,3688,3706,5100,5270,5530,5532,5864,6285,6507,6622,6804,6857,8541,9693,10368,10458,10814,22999,23154,23349,23657,26059,80863,91683,729956	ADCY1,APOE,ATP1A2,CA2,DAG1,EGFR,EPHA4,GRIA1,GRIA2,ITGB1,ITPKA,PCDH8,SERPINE2,PPP3CA,PPP3CB,RAB3A,S100B,SLC1A3,SNCA,STX1A,SYT1,PPFIA3,RAPGEF2,CACNG3,BAIAP2,CPLX2,RIMS1,NCDN,PHF24,SLC7A11,ERC2,PRRT1,SYT12,SHISA7	34/-
8_Member	GO Biological Processes	GO:0050804	modulation of chemical synaptic transmission	-16.9043	-13.6118	107,348,477,760,1605,1956,2043,2890,2891,3688,3706,5100,5270,5530,5532,5864,6285,6507,6622,6804,6857,8541,9693,10368,10458,10814,22999,23154,23349,23657,26059,80863,91683,729956	ADCY1,APOE,ATP1A2,CA2,DAG1,EGFR,EPHA4,GRIA1,GRIA2,ITGB1,ITPKA,PCDH8,SERPINE2,PPP3CA,PPP3CB,RAB3A,S100B,SLC1A3,SNCA,STX1A,SYT1,PPFIA3,RAPGEF2,CACNG3,BAIAP2,CPLX2,RIMS1,NCDN,PHF24,SLC7A11,ERC2,PRRT1,SYT12,SHISA7	34/493
8_Member	GO Biological Processes	GO:0099177	regulation of trans-synaptic signaling	-16.8775	-13.6118	107,348,477,760,1605,1956,2043,2890,2891,3688,3706,5100,5270,5530,5532,5864,6285,6507,6622,6804,6857,8541,9693,10368,10458,10814,22999,23154,23349,23657,26059,80863,91683,729956	ADCY1,APOE,ATP1A2,CA2,DAG1,EGFR,EPHA4,GRIA1,GRIA2,ITGB1,ITPKA,PCDH8,SERPINE2,PPP3CA,PPP3CB,RAB3A,S100B,SLC1A3,SNCA,STX1A,SYT1,PPFIA3,RAPGEF2,CACNG3,BAIAP2,CPLX2,RIMS1,NCDN,PHF24,SLC7A11,ERC2,PRRT1,SYT12,SHISA7	34/494
8_Member	GO Biological Processes	GO:0048167	regulation of synaptic plasticity	-13.4996	-10.6732	107,348,1605,2043,2890,3706,5270,5532,5864,6285,6622,8541,9693,10458,10814,22999,23154,26059,80863,91683,729956	ADCY1,APOE,DAG1,EPHA4,GRIA1,ITPKA,SERPINE2,PPP3CB,RAB3A,S100B,SNCA,PPFIA3,RAPGEF2,BAIAP2,CPLX2,RIMS1,NCDN,ERC2,PRRT1,SYT12,SHISA7	21/216
8_Member	GO Biological Processes	GO:0050806	positive regulation of synaptic transmission	-8.73296	-6.35185	107,760,1956,2890,5270,6507,6622,6804,6857,10368,22999,80863,91683,729956	ADCY1,CA2,EGFR,GRIA1,SERPINE2,SLC1A3,SNCA,STX1A,SYT1,CACNG3,RIMS1,PRRT1,SYT12,SHISA7	14/156
9_Summary	GO Biological Processes	GO:0098657	import into cell	-15.2333	-12.2308	199,348,477,781,929,1212,1794,2890,2934,3684,3688,3689,3761,4067,4641,5338,5538,6455,6507,6526,6622,6804,6857,7409,7430,9892,10368,10947,10991,11031,23209,23396,23657,29108,29763,29924,55707,80208	AIF1,APOE,ATP1A2,CACNA2D1,CD14,CLTB,DOCK2,GRIA1,GSN,ITGAM,ITGB1,ITGB2,KCNJ4,LYN,MYO1C,PLD2,PPT1,SH3GL1,SLC1A3,SLC5A3,SNCA,STX1A,SYT1,VAV1,EZR,SNAP91,CACNG3,AP3M2,SLC38A3,RAB31,MLC1,PIP5K1C,SLC7A11,PYCARD,PACSIN3,EPN1,NECAP2,SPG11	38/-
9_Member	GO Biological Processes	GO:0098657	import into cell	-15.2333	-12.2308	199,348,477,781,929,1212,1794,2890,2934,3684,3688,3689,3761,4067,4641,5338,5538,6455,6507,6526,6622,6804,6857,7409,7430,9892,10368,10947,10991,11031,23209,23396,23657,29108,29763,29924,55707,80208	AIF1,APOE,ATP1A2,CACNA2D1,CD14,CLTB,DOCK2,GRIA1,GSN,ITGAM,ITGB1,ITGB2,KCNJ4,LYN,MYO1C,PLD2,PPT1,SH3GL1,SLC1A3,SLC5A3,SNCA,STX1A,SYT1,VAV1,EZR,SNAP91,CACNG3,AP3M2,SLC38A3,RAB31,MLC1,PIP5K1C,SLC7A11,PYCARD,PACSIN3,EPN1,NECAP2,SPG11	38/709
9_Member	GO Biological Processes	GO:0006897	endocytosis	-13.6658	-10.7833	199,348,929,1212,1794,2890,2934,3684,3688,3689,4067,4641,5338,5538,6455,6622,6804,6857,7409,7430,9892,10368,10947,11031,23209,23396,29108,29763,29924,55707,80208	AIF1,APOE,CD14,CLTB,DOCK2,GRIA1,GSN,ITGAM,ITGB1,ITGB2,LYN,MYO1C,PLD2,PPT1,SH3GL1,SNCA,STX1A,SYT1,VAV1,EZR,SNAP91,CACNG3,AP3M2,RAB31,MLC1,PIP5K1C,PYCARD,PACSIN3,EPN1,NECAP2,SPG11	31/522
9_Member	GO Biological Processes	GO:0006898	receptor-mediated endocytosis	-8.48405	-6.14337	348,929,1212,2890,3684,3688,3689,5538,6622,7430,9892,10368,11031,23396	APOE,CD14,CLTB,GRIA1,ITGAM,ITGB1,ITGB2,PPT1,SNCA,EZR,SNAP91,CACNG3,RAB31,PIP5K1C	14/163
9_Member	GO Biological Processes	GO:0006909	phagocytosis	-5.84928	-3.90232	199,929,2934,3684,3688,3689,4067,5338,7409,23396,80208	AIF1,CD14,GSN,ITGAM,ITGB1,ITGB2,LYN,PLD2,VAV1,PIP5K1C,SPG11	11/159
9_Member	GO Biological Processes	GO:0031623	receptor internalization	-4.83929	-3.05916	2890,3688,3689,6622,7430,10368,11031	GRIA1,ITGB1,ITGB2,SNCA,EZR,CACNG3,RAB31	7/73
10_Summary	GO Biological Processes	GO:0009611	response to wounding	-15.1983	-12.2152	308,960,977,1192,1465,1495,1605,2152,2596,3611,3688,3693,4067,4853,5270,5341,5530,5777,5864,6507,6814,6868,7094,7409,10413,10672,23657,83706,196527,349667,490,747,961,1191,1794,3655,3684,3687,3689,3709,5593,6678,55970,135228,221955,348,361,1131,1956,2697,9414	ANXA5,CD44,CD151,CLIC1,CSRP1,CTNNA1,DAG1,F3,GAP43,ILK,ITGB1,ITGB5,LYN,NOTCH2,SERPINE2,PLEK,PPP3CA,PTPN6,RAB3A,SLC1A3,STXBP3,ADAM17,TLN1,VAV1,YAP1,GNA13,SLC7A11,FERMT3,ANO6,RTN4RL2,ATP2B1,DAGLA,CD47,CLU,DOCK2,ITGA6,ITGAM,ITGAX,ITGB2,ITPR2,PRKG2,SPARC,GNG12,CD109,DAGLB,APOE,AQP4,CHRM3,EGFR,GJA1,TJP2	51/-
10_Member	GO Biological Processes	GO:0009611	response to wounding	-15.1983	-12.2152	308,960,977,1192,1465,1495,1605,2152,2596,3611,3688,3693,4067,4853,5270,5341,5530,5777,5864,6507,6814,6868,7094,7409,10413,10672,23657,83706,196527,349667	ANXA5,CD44,CD151,CLIC1,CSRP1,CTNNA1,DAG1,F3,GAP43,ILK,ITGB1,ITGB5,LYN,NOTCH2,SERPINE2,PLEK,PPP3CA,PTPN6,RAB3A,SLC1A3,STXBP3,ADAM17,TLN1,VAV1,YAP1,GNA13,SLC7A11,FERMT3,ANO6,RTN4RL2	30/426
10_Member	GO Biological Processes	GO:0042060	wound healing	-13.822	-10.9085	308,960,977,1192,1465,1605,2152,3611,3688,3693,4853,5270,5341,5530,5777,5864,6814,6868,7094,7409,10413,10672,23657,83706,196527	ANXA5,CD44,CD151,CLIC1,CSRP1,DAG1,F3,ILK,ITGB1,ITGB5,NOTCH2,SERPINE2,PLEK,PPP3CA,PTPN6,RAB3A,STXBP3,ADAM17,TLN1,VAV1,YAP1,GNA13,SLC7A11,FERMT3,ANO6	25/318
10_Member	Reactome Gene Sets	R-HSA-109582	Hemostasis	-10.2447	-7.68517	308,490,747,960,961,1191,1794,2152,3655,3684,3687,3688,3689,3709,4067,5270,5341,5593,5777,6678,6814,7094,7409,10672,23657,55970,83706,135228,221955	ANXA5,ATP2B1,DAGLA,CD44,CD47,CLU,DOCK2,F3,ITGA6,ITGAM,ITGAX,ITGB1,ITGB2,ITPR2,LYN,SERPINE2,PLEK,PRKG2,PTPN6,SPARC,STXBP3,TLN1,VAV1,GNA13,SLC7A11,GNG12,FERMT3,CD109,DAGLB	29/622
10_Member	GO Biological Processes	GO:0050878	regulation of body fluid levels	-9.42739	-6.93982	308,348,361,1131,1192,1465,1956,2152,2697,3611,5270,5341,5530,5777,6814,7094,7409,10672,23657,83706,196527	ANXA5,APOE,AQP4,CHRM3,CLIC1,CSRP1,EGFR,F3,GJA1,ILK,SERPINE2,PLEK,PPP3CA,PTPN6,STXBP3,TLN1,VAV1,GNA13,SLC7A11,FERMT3,ANO6	21/353
10_Member	GO Biological Processes	GO:0007596	blood coagulation	-9.07019	-6.61178	308,1192,1465,2152,3611,5270,5341,5777,6814,7094,7409,10672,23657,83706,196527	ANXA5,CLIC1,CSRP1,F3,ILK,SERPINE2,PLEK,PTPN6,STXBP3,TLN1,VAV1,GNA13,SLC7A11,FERMT3,ANO6	15/174
10_Member	GO Biological Processes	GO:0030168	platelet activation	-9.02008	-6.5728	1192,1465,3611,5270,5341,5777,6814,7094,7409,10672,23657,83706	CLIC1,CSRP1,ILK,SERPINE2,PLEK,PTPN6,STXBP3,TLN1,VAV1,GNA13,SLC7A11,FERMT3	12/100
10_Member	GO Biological Processes	GO:0050817	coagulation	-9.00103	-6.56462	308,1192,1465,2152,3611,5270,5341,5777,6814,7094,7409,10672,23657,83706,196527	ANXA5,CLIC1,CSRP1,F3,ILK,SERPINE2,PLEK,PTPN6,STXBP3,TLN1,VAV1,GNA13,SLC7A11,FERMT3,ANO6	15/176
10_Member	GO Biological Processes	GO:0007599	hemostasis	-8.86544	-6.46502	308,1192,1465,2152,3611,5270,5341,5777,6814,7094,7409,10672,23657,83706,196527	ANXA5,CLIC1,CSRP1,F3,ILK,SERPINE2,PLEK,PTPN6,STXBP3,TLN1,VAV1,GNA13,SLC7A11,FERMT3,ANO6	15/180
10_Member	GO Biological Processes	GO:0070527	platelet aggregation	-8.75853	-6.3717	1192,1465,3611,5341,5777,6814,7094,23657,83706	CLIC1,CSRP1,ILK,PLEK,PTPN6,STXBP3,TLN1,SLC7A11,FERMT3	9/47
10_Member	GO Biological Processes	GO:0034109	homotypic cell-cell adhesion	-8.75756	-6.3717	1192,1465,3611,5341,5777,6814,7094,9414,23657,83706	CLIC1,CSRP1,ILK,PLEK,PTPN6,STXBP3,TLN1,TJP2,SLC7A11,FERMT3	10/64
10_Member	Reactome Gene Sets	R-HSA-76002	Platelet activation, signaling and aggregation	-7.45403	-5.23298	308,747,1191,3709,4067,5341,5777,6678,6814,7094,7409,10672,55970,83706,135228,221955	ANXA5,DAGLA,CLU,ITPR2,LYN,PLEK,PTPN6,SPARC,STXBP3,TLN1,VAV1,GNA13,GNG12,FERMT3,CD109,DAGLB	16/263
10_Member	Reactome Gene Sets	R-HSA-76005	Response to elevated platelet cytosolic Ca2+	-3.95442	-2.3475	308,1191,5341,6678,6814,7094,83706,135228	ANXA5,CLU,PLEK,SPARC,STXBP3,TLN1,FERMT3,CD109	8/134
10_Member	Reactome Gene Sets	R-HSA-114608	Platelet degranulation	-3.27536	-1.80552	308,1191,5341,6678,7094,83706,135228	ANXA5,CLU,PLEK,SPARC,TLN1,FERMT3,CD109	7/129
11_Summary	KEGG Pathway	hsa04810	Regulation of actin cytoskeleton	-15.0449	-12.0802	1131,1956,2934,3071,3655,3684,3687,3688,3689,3693,4478,5829,5962,6237,7409,7430,8826,10095,10458,10672,23396,55970,79784,929,960,2549,3709,5777,6774	CHRM3,EGFR,GSN,NCKAP1L,ITGA6,ITGAM,ITGAX,ITGB1,ITGB2,ITGB5,MSN,PXN,RDX,RRAS,VAV1,EZR,IQGAP1,ARPC1B,BAIAP2,GNA13,PIP5K1C,GNG12,MYH14,CD14,CD44,GAB1,ITPR2,PTPN6,STAT3	29/-
11_Member	KEGG Pathway	hsa04810	Regulation of actin cytoskeleton	-15.0449	-12.0802	1131,1956,2934,3071,3655,3684,3687,3688,3689,3693,4478,5829,5962,6237,7409,7430,8826,10095,10458,10672,23396,55970,79784	CHRM3,EGFR,GSN,NCKAP1L,ITGA6,ITGAM,ITGAX,ITGB1,ITGB2,ITGB5,MSN,PXN,RDX,RRAS,VAV1,EZR,IQGAP1,ARPC1B,BAIAP2,GNA13,PIP5K1C,GNG12,MYH14	23/229
11_Member	WikiPathways	WP51	Regulation of actin cytoskeleton	-9.98032	-7.43476	929,1131,1956,2934,4478,5829,5962,6237,7409,7430,8826,10458,10672,23396,55970	CD14,CHRM3,EGFR,GSN,MSN,PXN,RDX,RRAS,VAV1,EZR,IQGAP1,BAIAP2,GNA13,PIP5K1C,GNG12	15/150
11_Member	KEGG Pathway	hsa05205	Proteoglycans in cancer	-8.14894	-5.83342	960,1956,2549,3688,3693,3709,4478,5777,5829,5962,6237,6774,7409,7430,8826	CD44,EGFR,GAB1,ITGB1,ITGB5,ITPR2,MSN,PTPN6,PXN,RDX,RRAS,STAT3,VAV1,EZR,IQGAP1	15/203
12_Summary	GO Biological Processes	GO:0030335	positive regulation of cell migration	-13.9948	-11.0649	199,961,977,1956,2043,2152,2549,2896,3071,3383,3655,3687,3688,3958,3965,4067,4641,5530,5962,6237,6282,6678,6774,6868,7070,8895,9693,10396,10457,29108,57118,83706,196527	AIF1,CD47,CD151,EGFR,EPHA4,F3,GAB1,GRN,NCKAP1L,ICAM1,ITGA6,ITGAX,ITGB1,LGALS3,LGALS9,LYN,MYO1C,PPP3CA,RDX,RRAS,S100A11,SPARC,STAT3,ADAM17,THY1,CPNE3,RAPGEF2,ATP8A1,GPNMB,PYCARD,CAMK1D,FERMT3,ANO6	33/-
12_Member	GO Biological Processes	GO:0030335	positive regulation of cell migration	-13.9948	-11.0649	199,961,977,1956,2043,2152,2549,2896,3071,3383,3655,3687,3688,3958,3965,4067,4641,5530,5962,6237,6282,6678,6774,6868,7070,8895,9693,10396,10457,29108,57118,83706,196527	AIF1,CD47,CD151,EGFR,EPHA4,F3,GAB1,GRN,NCKAP1L,ICAM1,ITGA6,ITGAX,ITGB1,LGALS3,LGALS9,LYN,MYO1C,PPP3CA,RDX,RRAS,S100A11,SPARC,STAT3,ADAM17,THY1,CPNE3,RAPGEF2,ATP8A1,GPNMB,PYCARD,CAMK1D,FERMT3,ANO6	33/580
12_Member	GO Biological Processes	GO:2000147	positive regulation of cell motility	-13.4374	-10.6239	199,961,977,1956,2043,2152,2549,2896,3071,3383,3655,3687,3688,3958,3965,4067,4641,5530,5962,6237,6282,6678,6774,6868,7070,8895,9693,10396,10457,29108,57118,83706,196527	AIF1,CD47,CD151,EGFR,EPHA4,F3,GAB1,GRN,NCKAP1L,ICAM1,ITGA6,ITGAX,ITGB1,LGALS3,LGALS9,LYN,MYO1C,PPP3CA,RDX,RRAS,S100A11,SPARC,STAT3,ADAM17,THY1,CPNE3,RAPGEF2,ATP8A1,GPNMB,PYCARD,CAMK1D,FERMT3,ANO6	33/607
12_Member	GO Biological Processes	GO:0040017	positive regulation of locomotion	-13.1603	-10.3717	199,961,977,1956,2043,2152,2549,2896,3071,3383,3655,3687,3688,3958,3965,4067,4641,5530,5962,6237,6282,6678,6774,6868,7070,8895,9693,10396,10457,29108,57118,83706,196527	AIF1,CD47,CD151,EGFR,EPHA4,F3,GAB1,GRN,NCKAP1L,ICAM1,ITGA6,ITGAX,ITGB1,LGALS3,LGALS9,LYN,MYO1C,PPP3CA,RDX,RRAS,S100A11,SPARC,STAT3,ADAM17,THY1,CPNE3,RAPGEF2,ATP8A1,GPNMB,PYCARD,CAMK1D,FERMT3,ANO6	33/621
13_Summary	WikiPathways	WP3888	VEGFA VEGFR2 signaling	-13.3132	-10.5124	781,824,1192,1200,1465,1495,2152,2317,2549,2697,3383,3418,3688,3693,4641,4790,4860,5331,5530,5777,5829,6774,7430,8826,9444,9588,29924,57326	CACNA2D1,CAPN2,CLIC1,TPP1,CSRP1,CTNNA1,F3,FLNB,GAB1,GJA1,ICAM1,IDH2,ITGB1,ITGB5,MYO1C,NFKB1,PNP,PLCB3,PPP3CA,PTPN6,PXN,STAT3,EZR,IQGAP1,QKI,PRDX6,EPN1,PBXIP1	28/-
13_Member	WikiPathways	WP3888	VEGFA VEGFR2 signaling	-13.3132	-10.5124	781,824,1192,1200,1465,1495,2152,2317,2549,2697,3383,3418,3688,3693,4641,4790,4860,5331,5530,5777,5829,6774,7430,8826,9444,9588,29924,57326	CACNA2D1,CAPN2,CLIC1,TPP1,CSRP1,CTNNA1,F3,FLNB,GAB1,GJA1,ICAM1,IDH2,ITGB1,ITGB5,MYO1C,NFKB1,PNP,PLCB3,PPP3CA,PTPN6,PXN,STAT3,EZR,IQGAP1,QKI,PRDX6,EPN1,PBXIP1	28/432
14_Summary	GO Biological Processes	GO:0007229	integrin-mediated signaling pathway	-12.986	-10.2093	961,1495,3611,3655,3684,3687,3688,3689,3693,5341,7070,7094,7409,55914,83706,824,871,960,977,1462,1509,1605,2202,3383,6678,6868,7412,5829,10174,79778,1007,1008,1956,10413,4359,5792,9369,257194,4067,5777,23657,3716,6774,3965,4790,8408,534,535,929,55970	CD47,CTNNA1,ILK,ITGA6,ITGAM,ITGAX,ITGB1,ITGB2,ITGB5,PLEK,THY1,TLN1,VAV1,ERBIN,FERMT3,CAPN2,SERPINH1,CD44,CD151,VCAN,CTSD,DAG1,EFEMP1,ICAM1,SPARC,ADAM17,VCAM1,PXN,SORBS3,MICALL2,CDH9,CDH10,EGFR,YAP1,MPZ,PTPRF,NRXN3,NEGR1,LYN,PTPN6,SLC7A11,JAK1,STAT3,LGALS9,NFKB1,ULK1,ATP6V1G2,ATP6V0A1,CD14,GNG12	50/-
14_Member	GO Biological Processes	GO:0007229	integrin-mediated signaling pathway	-12.986	-10.2093	961,1495,3611,3655,3684,3687,3688,3689,3693,5341,7070,7094,7409,55914,83706	CD47,CTNNA1,ILK,ITGA6,ITGAM,ITGAX,ITGB1,ITGB2,ITGB5,PLEK,THY1,TLN1,VAV1,ERBIN,FERMT3	15/94
14_Member	Reactome Gene Sets	R-HSA-1474244	Extracellular matrix organization	-9.03306	-6.58025	824,871,960,961,977,1462,1509,1605,2202,3383,3655,3684,3687,3688,3689,3693,6678,6868,7412	CAPN2,SERPINH1,CD44,CD47,CD151,VCAN,CTSD,DAG1,EFEMP1,ICAM1,ITGA6,ITGAM,ITGAX,ITGB1,ITGB2,ITGB5,SPARC,ADAM17,VCAM1	19/300
14_Member	GO Biological Processes	GO:0031589	cell-substrate adhesion	-8.70083	-6.3382	960,1605,3611,3655,3684,3687,3688,3689,3693,5829,7070,7412,10174,79778,83706	CD44,DAG1,ILK,ITGA6,ITGAM,ITGAX,ITGB1,ITGB2,ITGB5,PXN,THY1,VCAM1,SORBS3,MICALL2,FERMT3	15/185
14_Member	WikiPathways	WP4541	Hippo Merlin signaling dysregulation	-8.06115	-5.75367	960,1007,1008,1495,1956,3655,3684,3687,3688,3689,3693,10413	CD44,CDH9,CDH10,CTNNA1,EGFR,ITGA6,ITGAM,ITGAX,ITGB1,ITGB2,ITGB5,YAP1	12/121
14_Member	GO Biological Processes	GO:0033627	cell adhesion mediated by integrin	-7.91476	-5.63431	3383,3655,3684,3687,3688,3689,3693,6868	ICAM1,ITGA6,ITGAM,ITGAX,ITGB1,ITGB2,ITGB5,ADAM17	8/41
14_Member	Reactome Gene Sets	R-HSA-216083	Integrin cell surface interactions	-7.52967	-5.28513	960,961,3383,3655,3684,3687,3688,3689,3693,7412	CD44,CD47,ICAM1,ITGA6,ITGAM,ITGAX,ITGB1,ITGB2,ITGB5,VCAM1	10/85
14_Member	GO Biological Processes	GO:0007160	cell-matrix adhesion	-7.41619	-5.20163	960,1605,3611,3655,3684,3687,3688,3689,3693,7070,7412,83706	CD44,DAG1,ILK,ITGA6,ITGAM,ITGAX,ITGB1,ITGB2,ITGB5,THY1,VCAM1,FERMT3	12/138
14_Member	GO Biological Processes	GO:0034113	heterotypic cell-cell adhesion	-6.80944	-4.68984	961,3684,3687,3688,3689,7070,7412	CD47,ITGAM,ITGAX,ITGB1,ITGB2,THY1,VCAM1	7/38
14_Member	WikiPathways	WP185	Integrin mediated cell adhesion	-6.76721	-4.65541	824,3611,3655,3684,3687,3688,3689,3693,5829,7094	CAPN2,ILK,ITGA6,ITGAM,ITGAX,ITGB1,ITGB2,ITGB5,PXN,TLN1	10/102
14_Member	Canonical Pathways	M47	PID INTEGRIN CS PATHWAY	-6.52921	-4.45847	3655,3684,3687,3688,3689,3693	ITGA6,ITGAM,ITGAX,ITGB1,ITGB2,ITGB5	6/26
14_Member	Canonical Pathways	M169	PID INTEGRIN2 PATHWAY	-6.22655	-4.20497	3383,3684,3687,3689,7070,7412	ICAM1,ITGAM,ITGAX,ITGB2,THY1,VCAM1	6/29
14_Member	KEGG Pathway	hsa04514	Cell adhesion molecules	-5.90343	-3.94706	1462,3383,3655,3684,3688,3689,4359,5792,7412,9369,257194	VCAN,ICAM1,ITGA6,ITGAM,ITGB1,ITGB2,MPZ,PTPRF,VCAM1,NRXN3,NEGR1	11/157
14_Member	Reactome Gene Sets	R-HSA-202733	Cell surface interactions at the vascular wall	-5.57916	-3.67986	960,961,3655,3684,3687,3688,3689,4067,5777,23657	CD44,CD47,ITGA6,ITGAM,ITGAX,ITGB1,ITGB2,LYN,PTPN6,SLC7A11	10/137
14_Member	Reactome Gene Sets	R-HSA-6785807	Interleukin-4 and Interleukin-13 signaling	-4.6213	-2.89654	3383,3684,3687,3688,3689,3716,6774,7412	ICAM1,ITGAM,ITGAX,ITGB1,ITGB2,JAK1,STAT3,VCAM1	8/108
14_Member	WikiPathways	WP4493	Cells and molecules involved in local acute inflammatory response	-4.54122	-2.8328	3383,3688,3689,7412	ICAM1,ITGB1,ITGB2,VCAM1	4/17
14_Member	WikiPathways	WP5087	Pleural mesothelioma	-3.99285	-2.37954	960,961,1007,1008,1495,1956,3655,3688,3689,3716,3965,4790,6678,8408,10413	CD44,CD47,CDH9,CDH10,CTNNA1,EGFR,ITGA6,ITGB1,ITGB2,JAK1,LGALS9,NFKB1,SPARC,ULK1,YAP1	15/439
14_Member	WikiPathways	WP4534	Mechanoregulation and pathology of YAP TAZ via Hippo and non Hippo mechanisms	-3.81627	-2.23329	1495,3688,3689,3693,10413	CTNNA1,ITGB1,ITGB2,ITGB5,YAP1	5/47
14_Member	KEGG Pathway	hsa04145	Phagosome	-2.85692	-1.48096	534,535,929,3684,3688,3689,3693	ATP6V1G2,ATP6V0A1,CD14,ITGAM,ITGB1,ITGB2,ITGB5	7/152
14_Member	WikiPathways	WP3932	Focal adhesion PI3K Akt mTOR signaling pathway	-2.22538	-0.995092	1956,3655,3687,3688,3689,3693,3716,8408,55970	EGFR,ITGA6,ITGAX,ITGB1,ITGB2,ITGB5,JAK1,ULK1,GNG12	9/302
15_Summary	Reactome Gene Sets	R-HSA-9675108	Nervous system development	-12.589	-9.83513	784,1212,1605,1947,1956,2043,2549,2596,3688,4067,4359,4440,4478,4650,5364,5365,5532,5720,5721,5962,6237,6327,7094,7430,10095,10413,10921,23396,79784,90249,219699,3611,5530,23654,56288	CACNB3,CLTB,DAG1,EFNB1,EGFR,EPHA4,GAB1,GAP43,ITGB1,LYN,MPZ,MSI1,MSN,MYO9B,PLXNB1,PLXNB3,PPP3CB,PSME1,PSME2,RDX,RRAS,SCN2B,TLN1,EZR,ARPC1B,YAP1,RNPS1,PIP5K1C,MYH14,UNC5A,UNC5B,ILK,PPP3CA,PLXNB2,PARD3	35/-
15_Member	Reactome Gene Sets	R-HSA-9675108	Nervous system development	-12.589	-9.83513	784,1212,1605,1947,1956,2043,2549,2596,3688,4067,4359,4440,4478,4650,5364,5365,5532,5720,5721,5962,6237,6327,7094,7430,10095,10413,10921,23396,79784,90249,219699	CACNB3,CLTB,DAG1,EFNB1,EGFR,EPHA4,GAB1,GAP43,ITGB1,LYN,MPZ,MSI1,MSN,MYO9B,PLXNB1,PLXNB3,PPP3CB,PSME1,PSME2,RDX,RRAS,SCN2B,TLN1,EZR,ARPC1B,YAP1,RNPS1,PIP5K1C,MYH14,UNC5A,UNC5B	31/573
15_Member	Reactome Gene Sets	R-HSA-422475	Axon guidance	-11.5678	-8.87616	784,1212,1605,1947,1956,2043,2549,2596,3688,4067,4440,4478,4650,5364,5365,5532,5720,5721,5962,6237,6327,7094,7430,10095,10921,23396,79784,90249,219699	CACNB3,CLTB,DAG1,EFNB1,EGFR,EPHA4,GAB1,GAP43,ITGB1,LYN,MSI1,MSN,MYO9B,PLXNB1,PLXNB3,PPP3CB,PSME1,PSME2,RDX,RRAS,SCN2B,TLN1,EZR,ARPC1B,RNPS1,PIP5K1C,MYH14,UNC5A,UNC5B	29/548
15_Member	KEGG Pathway	hsa04360	Axon guidance	-6.96839	-4.82215	1947,2043,3611,3688,5364,5365,5530,5532,6237,23654,56288,90249,219699	EFNB1,EPHA4,ILK,ITGB1,PLXNB1,PLXNB3,PPP3CA,PPP3CB,RRAS,PLXNB2,PARD3,UNC5A,UNC5B	13/182
16_Summary	GO Biological Processes	GO:0051960	regulation of nervous system development	-12.461	-9.71815	1181,1462,1495,1605,1620,1956,2043,3687,3688,3706,4067,5270,5364,5365,5530,7070,8408,9253,9444,9693,10413,10458,11076,22891,23654,56288,57463,163175,348,960,2596,2896,3383,3655,5792,5962,7430,8507,10611,23072,51225,57118,81565,116985,257194,349667,3071,3965,4853,4860,7535	CLCN2,VCAN,CTNNA1,DAG1,BRINP1,EGFR,EPHA4,ITGAX,ITGB1,ITPKA,LYN,SERPINE2,PLXNB1,PLXNB3,PPP3CA,THY1,ULK1,NUMBL,QKI,RAPGEF2,YAP1,BAIAP2,TPPP,ZNF365,PLXNB2,PARD3,AMIGO1,LGI4,APOE,CD44,GAP43,GRN,ICAM1,ITGA6,PTPRF,RDX,EZR,ENC1,PDLIM5,HECW1,ABI3,CAMK1D,NDEL1,ARAP1,NEGR1,RTN4RL2,NCKAP1L,LGALS9,NOTCH2,PNP,ZAP70	51/-
16_Member	GO Biological Processes	GO:0051960	regulation of nervous system development	-12.461	-9.71815	1181,1462,1495,1605,1620,1956,2043,3687,3688,3706,4067,5270,5364,5365,5530,7070,8408,9253,9444,9693,10413,10458,11076,22891,23654,56288,57463,163175	CLCN2,VCAN,CTNNA1,DAG1,BRINP1,EGFR,EPHA4,ITGAX,ITGB1,ITPKA,LYN,SERPINE2,PLXNB1,PLXNB3,PPP3CA,THY1,ULK1,NUMBL,QKI,RAPGEF2,YAP1,BAIAP2,TPPP,ZNF365,PLXNB2,PARD3,AMIGO1,LGI4	28/468
16_Member	GO Biological Processes	GO:0120035	regulation of plasma membrane bounded cell projection organization	-11.7254	-9.02397	348,960,2043,2596,2896,3383,3655,3706,4067,5364,5365,5530,5792,5962,7070,7430,8408,8507,9693,10413,10458,10611,22891,23072,23654,51225,57118,57463,81565,116985,257194,349667	APOE,CD44,EPHA4,GAP43,GRN,ICAM1,ITGA6,ITPKA,LYN,PLXNB1,PLXNB3,PPP3CA,PTPRF,RDX,THY1,EZR,ULK1,ENC1,RAPGEF2,YAP1,BAIAP2,PDLIM5,ZNF365,HECW1,PLXNB2,ABI3,CAMK1D,AMIGO1,NDEL1,ARAP1,NEGR1,RTN4RL2	32/659
16_Member	GO Biological Processes	GO:0031344	regulation of cell projection organization	-11.4343	-8.76151	348,960,2043,2596,2896,3383,3655,3706,4067,5364,5365,5530,5792,5962,7070,7430,8408,8507,9693,10413,10458,10611,22891,23072,23654,51225,57118,57463,81565,116985,257194,349667	APOE,CD44,EPHA4,GAP43,GRN,ICAM1,ITGA6,ITPKA,LYN,PLXNB1,PLXNB3,PPP3CA,PTPRF,RDX,THY1,EZR,ULK1,ENC1,RAPGEF2,YAP1,BAIAP2,PDLIM5,ZNF365,HECW1,PLXNB2,ABI3,CAMK1D,AMIGO1,NDEL1,ARAP1,NEGR1,RTN4RL2	32/676
16_Member	GO Biological Processes	GO:0050767	regulation of neurogenesis	-10.9351	-8.29773	1181,1462,1495,1605,1620,1956,2043,3688,3706,4067,5270,5364,5365,5530,7070,8408,9253,9444,9693,10413,10458,22891,23654,57463	CLCN2,VCAN,CTNNA1,DAG1,BRINP1,EGFR,EPHA4,ITGB1,ITPKA,LYN,SERPINE2,PLXNB1,PLXNB3,PPP3CA,THY1,ULK1,NUMBL,QKI,RAPGEF2,YAP1,BAIAP2,ZNF365,PLXNB2,AMIGO1	24/393
16_Member	GO Biological Processes	GO:0010975	regulation of neuron projection development	-10.2814	-7.71468	348,2043,2896,3655,3706,4067,5364,5365,5530,5792,7070,8408,8507,9693,10458,10611,22891,23072,23654,51225,57118,57463,81565,257194,349667	APOE,EPHA4,GRN,ITGA6,ITPKA,LYN,PLXNB1,PLXNB3,PPP3CA,PTPRF,THY1,ULK1,ENC1,RAPGEF2,BAIAP2,PDLIM5,ZNF365,HECW1,PLXNB2,ABI3,CAMK1D,AMIGO1,NDEL1,NEGR1,RTN4RL2	25/460
16_Member	GO Biological Processes	GO:0010720	positive regulation of cell development	-8.91067	-6.48913	1181,1462,1605,1956,2043,3071,3688,3706,3965,4067,4853,4860,5270,5364,5365,5530,7535,9253,9444,10458,22891,23654,57463	CLCN2,VCAN,DAG1,EGFR,EPHA4,NCKAP1L,ITGB1,ITPKA,LGALS9,LYN,NOTCH2,PNP,SERPINE2,PLXNB1,PLXNB3,PPP3CA,ZAP70,NUMBL,QKI,BAIAP2,ZNF365,PLXNB2,AMIGO1	23/454
16_Member	GO Biological Processes	GO:0050769	positive regulation of neurogenesis	-8.7129	-6.34113	1181,1462,1605,1956,2043,3688,3706,4067,5270,5364,5365,9253,9444,10458,22891,23654,57463	CLCN2,VCAN,DAG1,EGFR,EPHA4,ITGB1,ITPKA,LYN,SERPINE2,PLXNB1,PLXNB3,NUMBL,QKI,BAIAP2,ZNF365,PLXNB2,AMIGO1	17/246
16_Member	GO Biological Processes	GO:0010976	positive regulation of neuron projection development	-7.59791	-5.34643	348,2896,3655,3706,4067,5365,8507,9693,10458,23654,57118,57463,257194	APOE,GRN,ITGA6,ITPKA,LYN,PLXNB3,ENC1,RAPGEF2,BAIAP2,PLXNB2,CAMK1D,AMIGO1,NEGR1	13/161
16_Member	GO Biological Processes	GO:0051962	positive regulation of nervous system development	-7.5591	-5.3111	1181,1462,1605,1956,2043,3688,3706,4067,5270,5364,5365,9253,9444,10458,22891,23654,57463	CLCN2,VCAN,DAG1,EGFR,EPHA4,ITGB1,ITPKA,LYN,SERPINE2,PLXNB1,PLXNB3,NUMBL,QKI,BAIAP2,ZNF365,PLXNB2,AMIGO1	17/294
16_Member	GO Biological Processes	GO:0031346	positive regulation of cell projection organization	-6.30482	-4.26311	348,2043,2896,3655,3706,4067,5364,5365,8507,9693,10458,23654,57118,57463,81565,116985,257194	APOE,EPHA4,GRN,ITGA6,ITPKA,LYN,PLXNB1,PLXNB3,ENC1,RAPGEF2,BAIAP2,PLXNB2,CAMK1D,AMIGO1,NDEL1,ARAP1,NEGR1	17/360
17_Summary	GO Biological Processes	GO:0051336	regulation of hydrolase activity	-12.363	-9.63086	444,871,960,1509,1676,1956,2043,2152,2896,2934,3071,3655,3688,3958,3965,3987,4067,5270,5341,5364,5365,5720,5721,5962,6622,6774,7070,7409,9639,9693,23654,29108,57326,81565,116985	ASPH,SERPINH1,CD44,CTSD,DFFA,EGFR,EPHA4,F3,GRN,GSN,NCKAP1L,ITGA6,ITGB1,LGALS3,LGALS9,LIMS1,LYN,SERPINE2,PLEK,PLXNB1,PLXNB3,PSME1,PSME2,RDX,SNCA,STAT3,THY1,VAV1,ARHGEF10,RAPGEF2,PLXNB2,PYCARD,PBXIP1,NDEL1,ARAP1	35/-
17_Member	GO Biological Processes	GO:0051336	regulation of hydrolase activity	-12.363	-9.63086	444,871,960,1509,1676,1956,2043,2152,2896,2934,3071,3655,3688,3958,3965,3987,4067,5270,5341,5364,5365,5720,5721,5962,6622,6774,7070,7409,9639,9693,23654,29108,57326,81565,116985	ASPH,SERPINH1,CD44,CTSD,DFFA,EGFR,EPHA4,F3,GRN,GSN,NCKAP1L,ITGA6,ITGB1,LGALS3,LGALS9,LIMS1,LYN,SERPINE2,PLEK,PLXNB1,PLXNB3,PSME1,PSME2,RDX,SNCA,STAT3,THY1,VAV1,ARHGEF10,RAPGEF2,PLXNB2,PYCARD,PBXIP1,NDEL1,ARAP1	35/746
17_Member	GO Biological Processes	GO:0051345	positive regulation of hydrolase activity	-9.12554	-6.66145	444,1509,1956,2043,2152,2896,2934,3655,3688,3965,3987,4067,5341,5364,5720,5721,6622,6774,7070,9639,9693,29108,81565,116985	ASPH,CTSD,EGFR,EPHA4,F3,GRN,GSN,ITGA6,ITGB1,LGALS9,LIMS1,LYN,PLEK,PLXNB1,PSME1,PSME2,SNCA,STAT3,THY1,ARHGEF10,RAPGEF2,PYCARD,NDEL1,ARAP1	24/482
17_Member	GO Biological Processes	GO:0043087	regulation of GTPase activity	-5.97416	-3.98938	2043,3655,3688,3987,5364,5365,5962,7070,7409,9639,9693,23654,57326,81565,116985	EPHA4,ITGA6,ITGB1,LIMS1,PLXNB1,PLXNB3,RDX,THY1,VAV1,ARHGEF10,RAPGEF2,PLXNB2,PBXIP1,NDEL1,ARAP1	15/298
17_Member	GO Biological Processes	GO:0043547	positive regulation of GTPase activity	-3.01541	-1.60349	3655,3688,3987,5364,7070,9639,9693,81565,116985	ITGA6,ITGB1,LIMS1,PLXNB1,THY1,ARHGEF10,RAPGEF2,NDEL1,ARAP1	9/230
18_Summary	Reactome Gene Sets	R-HSA-6798695	Neutrophil degranulation	-12.1945	-9.48311	535,929,960,961,1509,1794,2896,2934,3071,3684,3687,3689,3958,4790,4860,5777,5864,6282,8773,8826,8895,9588,10396,10577,11031,11240,29108,196527	ATP6V0A1,CD14,CD44,CD47,CTSD,DOCK2,GRN,GSN,NCKAP1L,ITGAM,ITGAX,ITGB2,LGALS3,NFKB1,PNP,PTPN6,RAB3A,S100A11,SNAP23,IQGAP1,CPNE3,PRDX6,ATP8A1,NPC2,RAB31,PADI2,PYCARD,ANO6	28/-
18_Member	Reactome Gene Sets	R-HSA-6798695	Neutrophil degranulation	-12.1945	-9.48311	535,929,960,961,1509,1794,2896,2934,3071,3684,3687,3689,3958,4790,4860,5777,5864,6282,8773,8826,8895,9588,10396,10577,11031,11240,29108,196527	ATP6V0A1,CD14,CD44,CD47,CTSD,DOCK2,GRN,GSN,NCKAP1L,ITGAM,ITGAX,ITGB2,LGALS3,NFKB1,PNP,PTPN6,RAB3A,S100A11,SNAP23,IQGAP1,CPNE3,PRDX6,ATP8A1,NPC2,RAB31,PADI2,PYCARD,ANO6	28/480
19_Summary	Reactome Gene Sets	R-HSA-112316	Neuronal System	-11.3553	-8.69165	107,781,784,2037,2890,2891,3756,3761,5331,5792,5864,6507,6804,6857,8541,9369,10368,10611,22999,55970,56666,57622,78999,80059,91683	ADCY1,CACNA2D1,CACNB3,EPB41L2,GRIA1,GRIA2,KCNH1,KCNJ4,PLCB3,PTPRF,RAB3A,SLC1A3,STX1A,SYT1,PPFIA3,NRXN3,CACNG3,PDLIM5,RIMS1,GNG12,PANX2,LRFN1,LRFN4,LRRTM4,SYT12	25/-
19_Member	Reactome Gene Sets	R-HSA-112316	Neuronal System	-11.3553	-8.69165	107,781,784,2037,2890,2891,3756,3761,5331,5792,5864,6507,6804,6857,8541,9369,10368,10611,22999,55970,56666,57622,78999,80059,91683	ADCY1,CACNA2D1,CACNB3,EPB41L2,GRIA1,GRIA2,KCNH1,KCNJ4,PLCB3,PTPRF,RAB3A,SLC1A3,STX1A,SYT1,PPFIA3,NRXN3,CACNG3,PDLIM5,RIMS1,GNG12,PANX2,LRFN1,LRFN4,LRRTM4,SYT12	25/410
19_Member	Reactome Gene Sets	R-HSA-6794362	Protein-protein interactions at synapses	-9.7983	-7.27294	2037,2890,5792,6804,6857,8541,9369,10611,57622,78999,80059,91683	EPB41L2,GRIA1,PTPRF,STX1A,SYT1,PPFIA3,NRXN3,PDLIM5,LRFN1,LRFN4,LRRTM4,SYT12	12/86
19_Member	Reactome Gene Sets	R-HSA-112315	Transmission across Chemical Synapses	-6.51538	-4.44694	107,781,784,2890,2891,3761,5331,5864,6507,6804,6857,8541,10368,22999,55970	ADCY1,CACNA2D1,CACNB3,GRIA1,GRIA2,KCNJ4,PLCB3,RAB3A,SLC1A3,STX1A,SYT1,PPFIA3,CACNG3,RIMS1,GNG12	15/270
19_Member	Reactome Gene Sets	R-HSA-6794361	Neurexins and neuroligins	-5.67164	-3.7597	2037,6804,6857,9369,10611,80059,91683	EPB41L2,STX1A,SYT1,NRXN3,PDLIM5,LRRTM4,SYT12	7/55
20_Summary	Reactome Gene Sets	R-HSA-1500931	Cell-Cell communication	-10.9037	-8.27485	961,977,1007,1008,1495,2318,3611,3655,3688,3987,5777,5829,8826,23607,56288,253559,2697,2890,5364,7070,7094,8927,10160,10804,23396,23654,27445,79778,389941,2043,9253,9414	CD47,CD151,CDH9,CDH10,CTNNA1,FLNC,ILK,ITGA6,ITGB1,LIMS1,PTPN6,PXN,IQGAP1,CD2AP,PARD3,CADM2,GJA1,GRIA1,PLXNB1,THY1,TLN1,BSN,FARP1,GJB6,PIP5K1C,PLXNB2,PCLO,MICALL2,C1QL3,EPHA4,NUMBL,TJP2	32/-
20_Member	Reactome Gene Sets	R-HSA-1500931	Cell-Cell communication	-10.9037	-8.27485	961,977,1007,1008,1495,2318,3611,3655,3688,3987,5777,5829,8826,23607,56288,253559	CD47,CD151,CDH9,CDH10,CTNNA1,FLNC,ILK,ITGA6,ITGB1,LIMS1,PTPN6,PXN,IQGAP1,CD2AP,PARD3,CADM2	16/153
20_Member	GO Biological Processes	GO:0034329	cell junction assembly	-8.61705	-6.25892	1007,1008,1495,2697,2890,3655,5364,7070,7094,8927,10160,10804,23396,23654,27445,56288,79778,389941	CDH9,CDH10,CTNNA1,GJA1,GRIA1,ITGA6,PLXNB1,THY1,TLN1,BSN,FARP1,GJB6,PIP5K1C,PLXNB2,PCLO,PARD3,MICALL2,C1QL3	18/283
20_Member	Reactome Gene Sets	R-HSA-446728	Cell junction organization	-8.31428	-5.98641	977,1007,1008,1495,2318,3611,3655,3688,3987,5829,56288,253559	CD151,CDH9,CDH10,CTNNA1,FLNC,ILK,ITGA6,ITGB1,LIMS1,PXN,PARD3,CADM2	12/115
20_Member	GO Biological Processes	GO:0045216	cell-cell junction organization	-7.11019	-4.94998	1007,1008,1495,2043,2697,3987,7094,9253,9414,10804,23396,56288,79778	CDH9,CDH10,CTNNA1,EPHA4,GJA1,LIMS1,TLN1,NUMBL,TJP2,GJB6,PIP5K1C,PARD3,MICALL2	13/177
20_Member	GO Biological Processes	GO:0007043	cell-cell junction assembly	-5.00135	-3.1855	1007,1008,1495,2697,7094,10804,23396,56288,79778	CDH9,CDH10,CTNNA1,GJA1,TLN1,GJB6,PIP5K1C,PARD3,MICALL2	9/126
20_Member	GO Biological Processes	GO:0034332	adherens junction organization	-3.60646	-2.05254	1007,1008,2043,9253,23396	CDH9,CDH10,EPHA4,NUMBL,PIP5K1C	5/52
20_Member	Reactome Gene Sets	R-HSA-421270	Cell-cell junction organization	-2.56562	-1.26221	1007,1008,1495,56288,253559	CDH9,CDH10,CTNNA1,PARD3,CADM2	5/88
20_Member	Reactome Gene Sets	R-HSA-418990	Adherens junctions interactions	-2.46884	-1.18877	1007,1008,1495,253559	CDH9,CDH10,CTNNA1,CADM2	4/57
