# Supplementary material for: PKD1-tau disulfide linkage promotes tau phosphorylation and tau accumulation in a tauopathy mouse model
Source: Research Square preprint supplement (doi:10.21203/rs.3.rs-7655539/v1), 2025-10-13
Supplement: Supplementary file 3 [file 4dd69c09fad2beca81eedec7.docx]

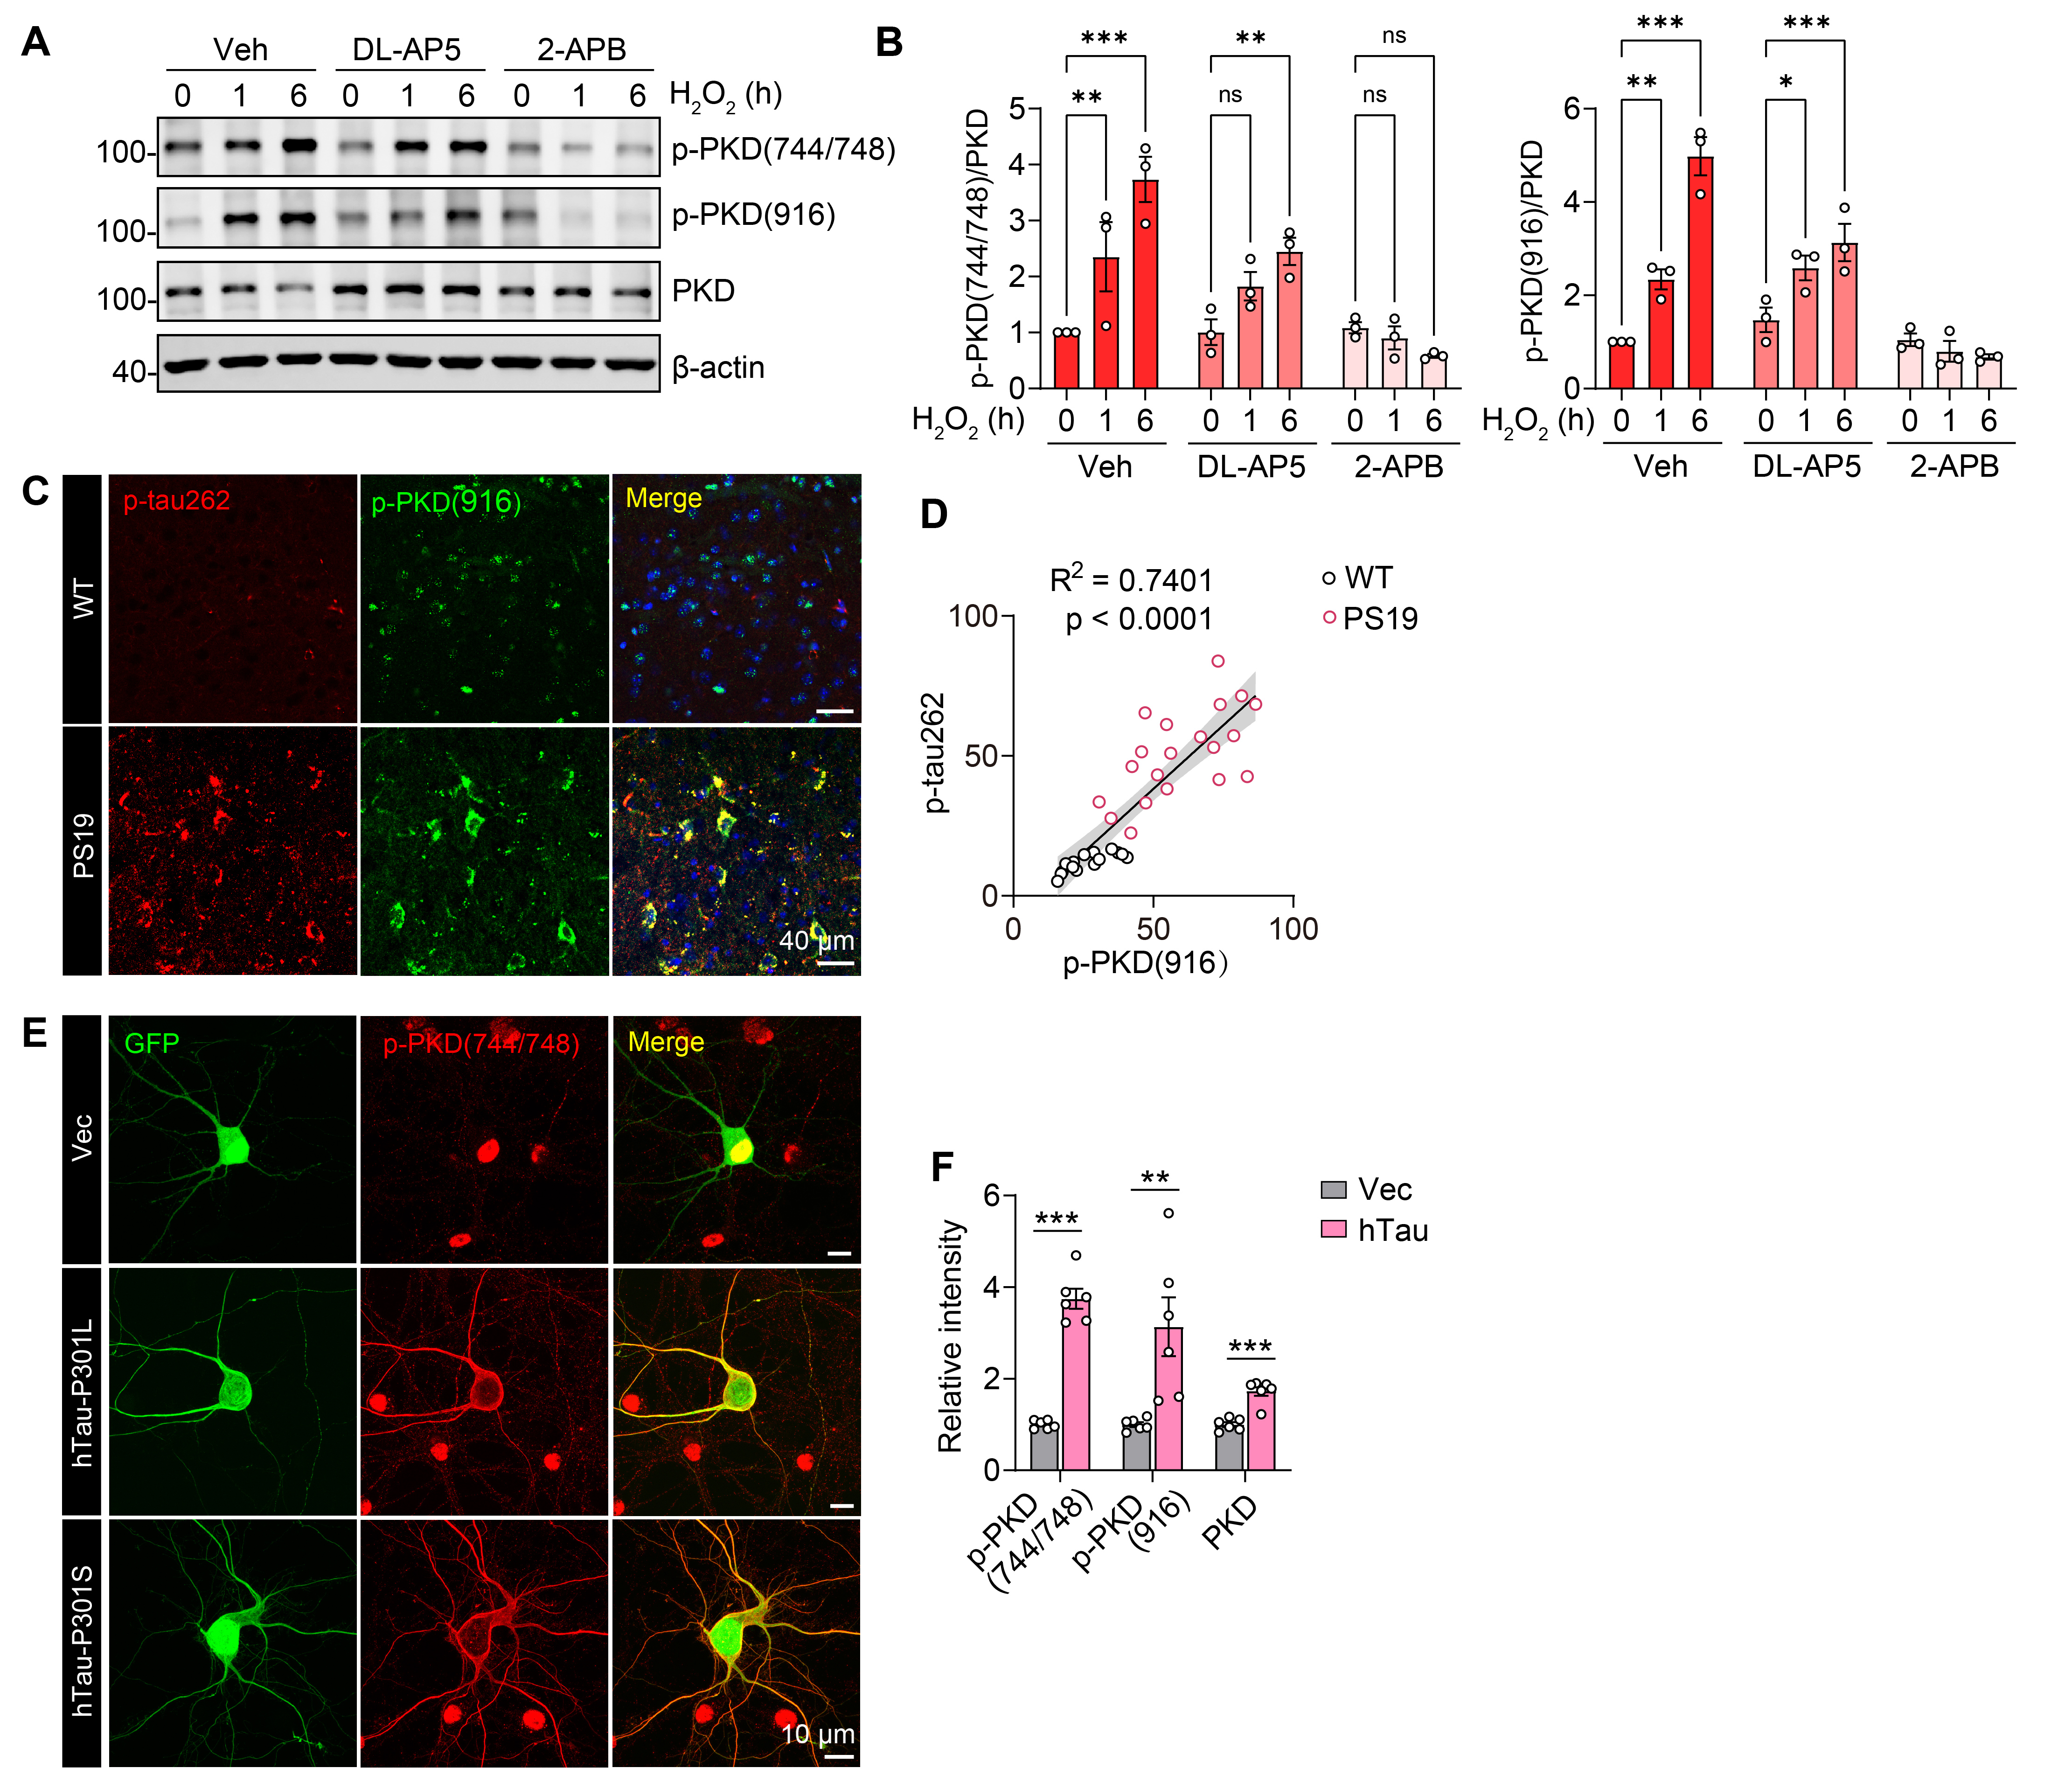


**Supplementary Figure 1 PKD1 activity in human tau-carrying neurons.**

(**A**) Representative blots of p-PKD (Ser744/748), p-PKD (Ser916), and PKD in primary cultured P301S tau-carrying neurons pretreated for 1 h with the NMDAR antagonist DL-AP5 (200 μM), or the store-operated calcium channel inhibitor 2-APB (10 μM), and stimulated with H2O2 (100 μM) for 1 or 6 h. (**B**) Quantification of p-PKD(Ser744/748) and p-PKD(Ser916) signals relative to total PKD in A. n = 3 independent experiments. (**C**) Representative immunostaining images of p-tau (Ser262) and p-PKD (Ser916) in the cortex of 9-month-old WT and PS19 mice. (**D**) Correlation analysis between p-PKD (Ser916) and p-tau (Ser262) in WT and PS19 mice. (**E**) Representative immunostaining images of p-PKD (Ser744/748) in primary cultured cortical neurons transfected with hTau-P301L, hTau-P301S, or control GFP plasmids. (**F**) Quantification of p-PKD (Ser744/748), p-PKD (Ser916) and PKD blots in Fig. 1L. n = 6 per group. Statistical significance was determined by unpaired Student’s t test (F) or two-way ANOVA with Dunnett’s post hoc analysis (B). Data are shown as mean ± SEM, **p* < 0.05, ***p* < 0.01, ****p* < 0.001, n. s, not significant.


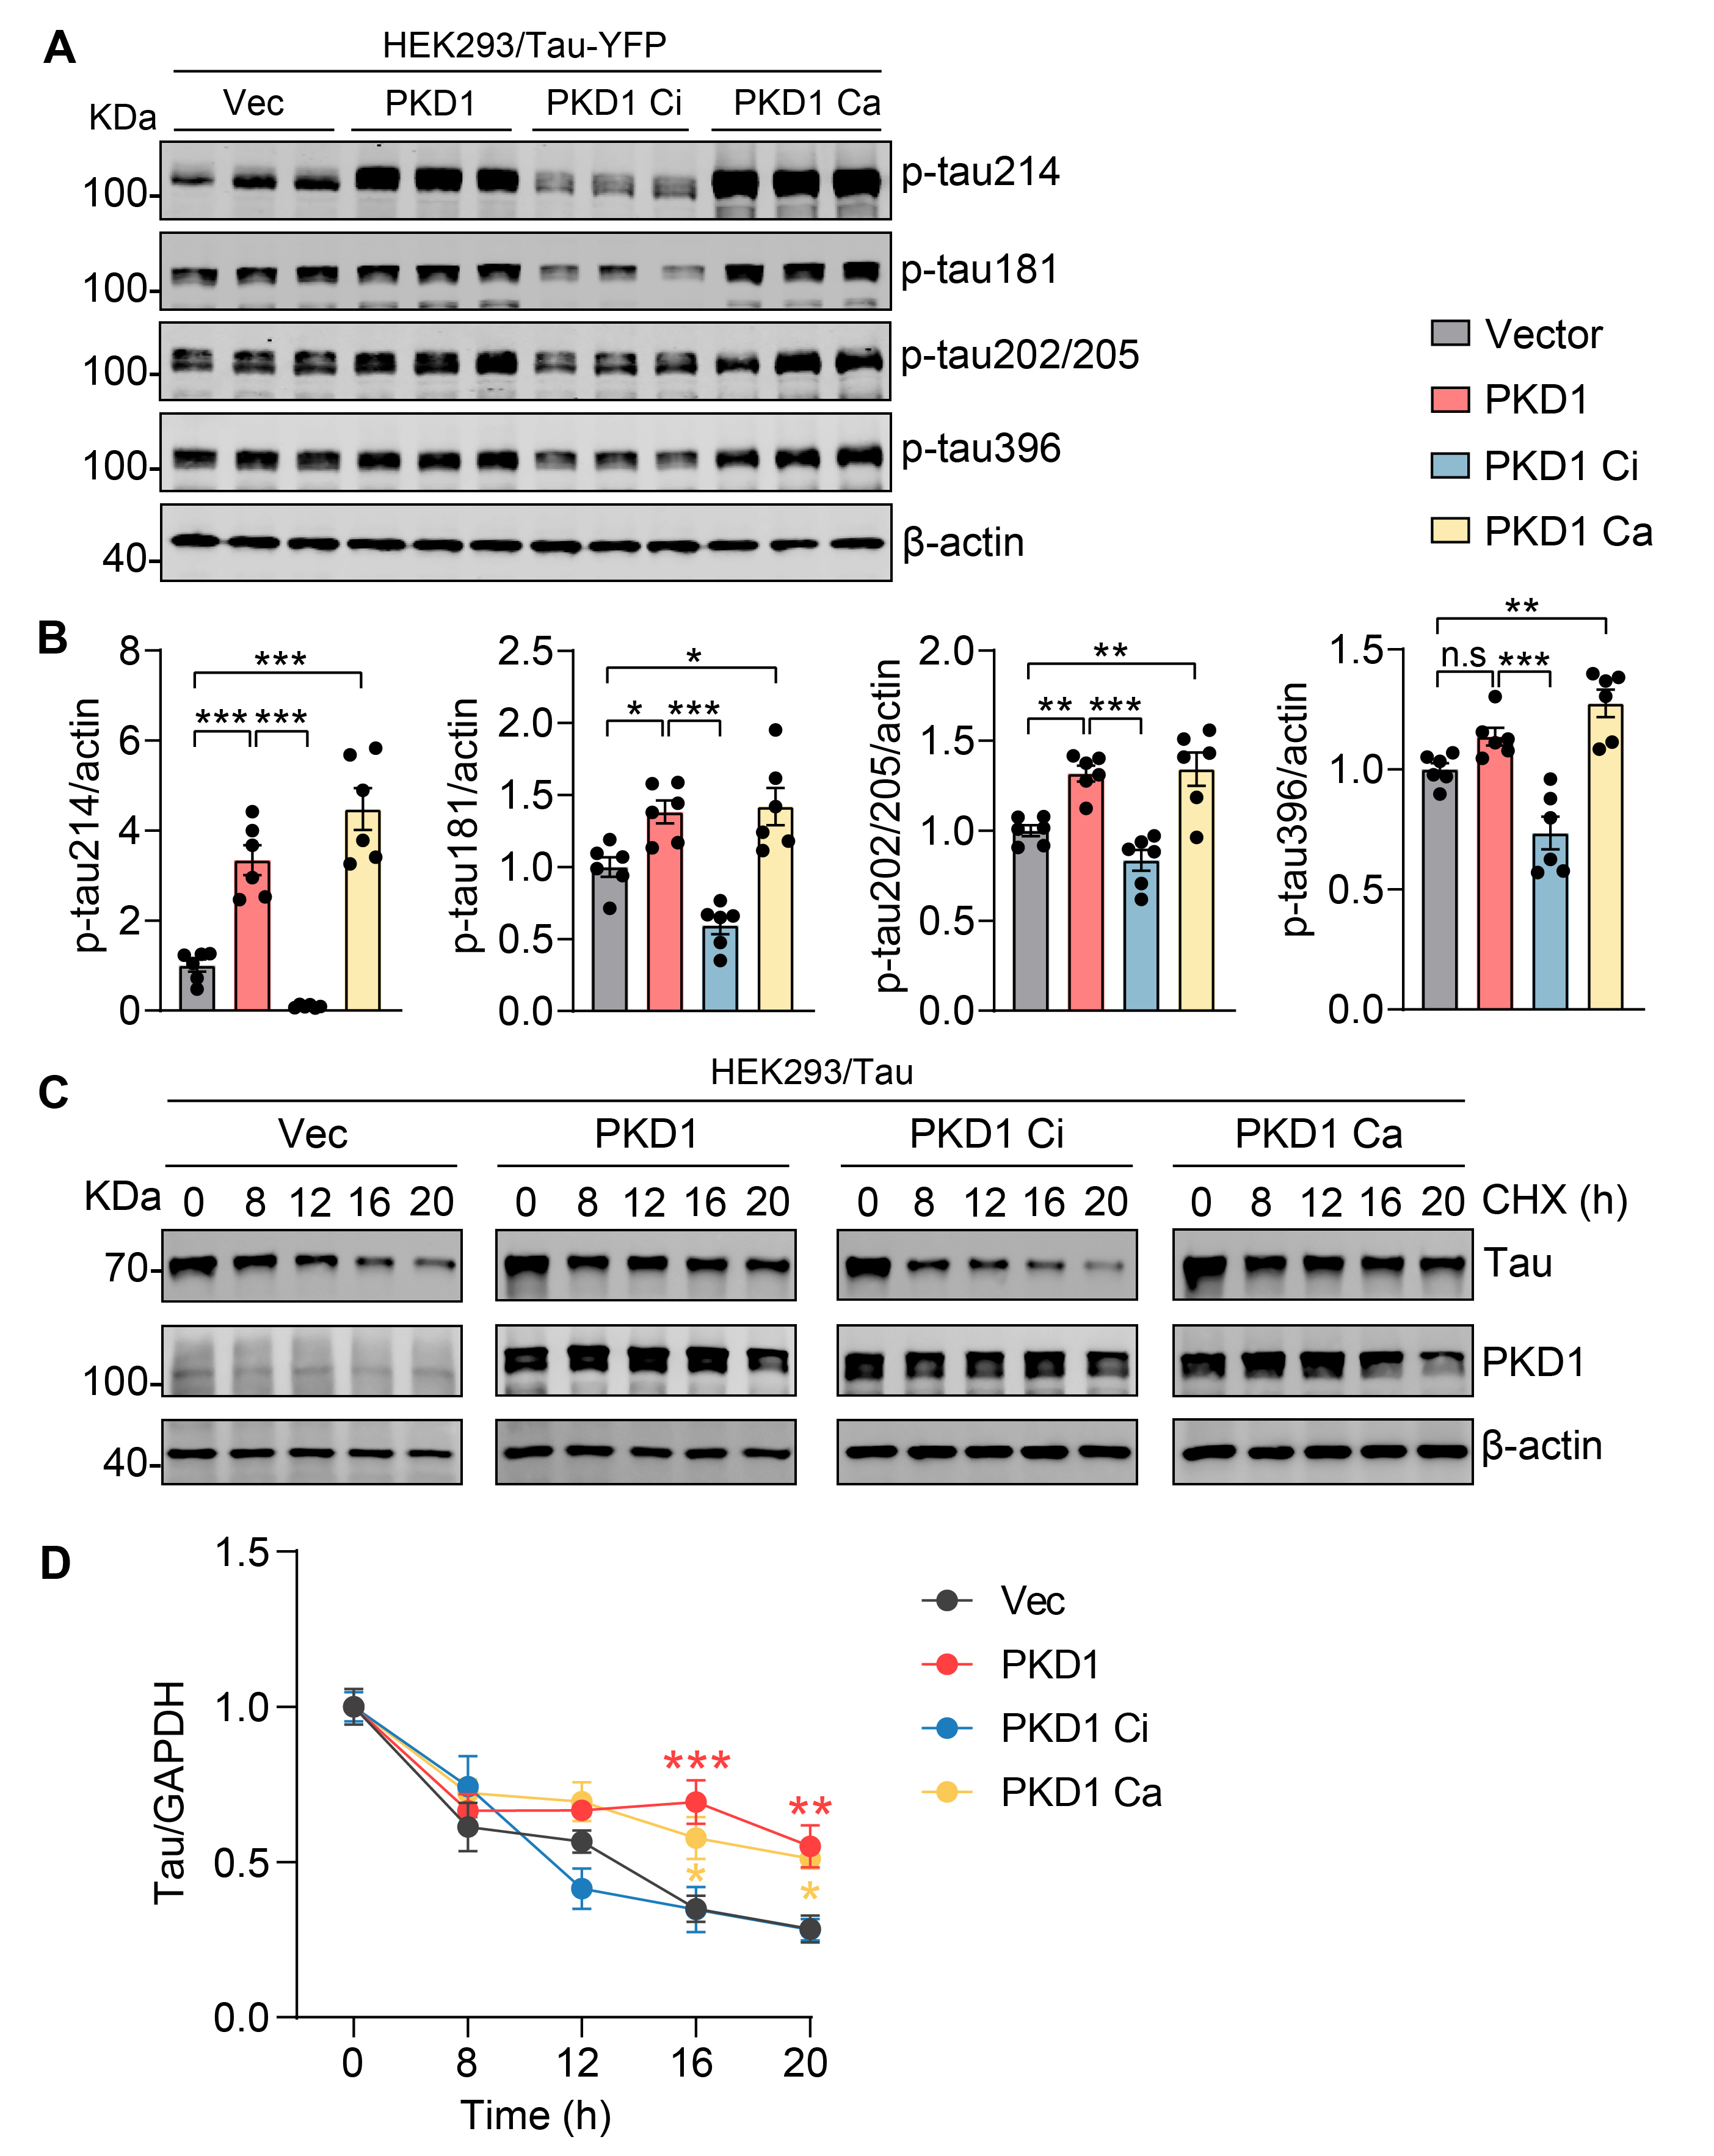


**Supplementary Figure 2 PKD1 regulates tau phosphorylation and tau stabilization.**

(**A** and **B**) Representative blots and quantifications of phosphorylated tau (p-Ser214, p-Thr181, p-Ser202/Thr205, p-Ser396) in total lysates from HEK293/tau-YFP cells transfected with control vector, PKD1, PKD1 Ci mutant, or PKD1 Ca mutant. n = 6 from 2 independent experiments. (**C** and **D**) Representative blots and quantifications of tau levels of lysates from HEK293/Tau cell lines overexpressed with control vector, PKD1, PKD1 Ci mutant, or PKD1 Ca mutant, and then treated with cycloheximide (CHX) for indicated periods of time. n = 4 per group. Statistical significance was determined by two-way ANOVA with Dunnett’s post hoc analysis. **p* < 0.05, ***p* < 0.01, ****p* < 0.001, n. s, not significant.


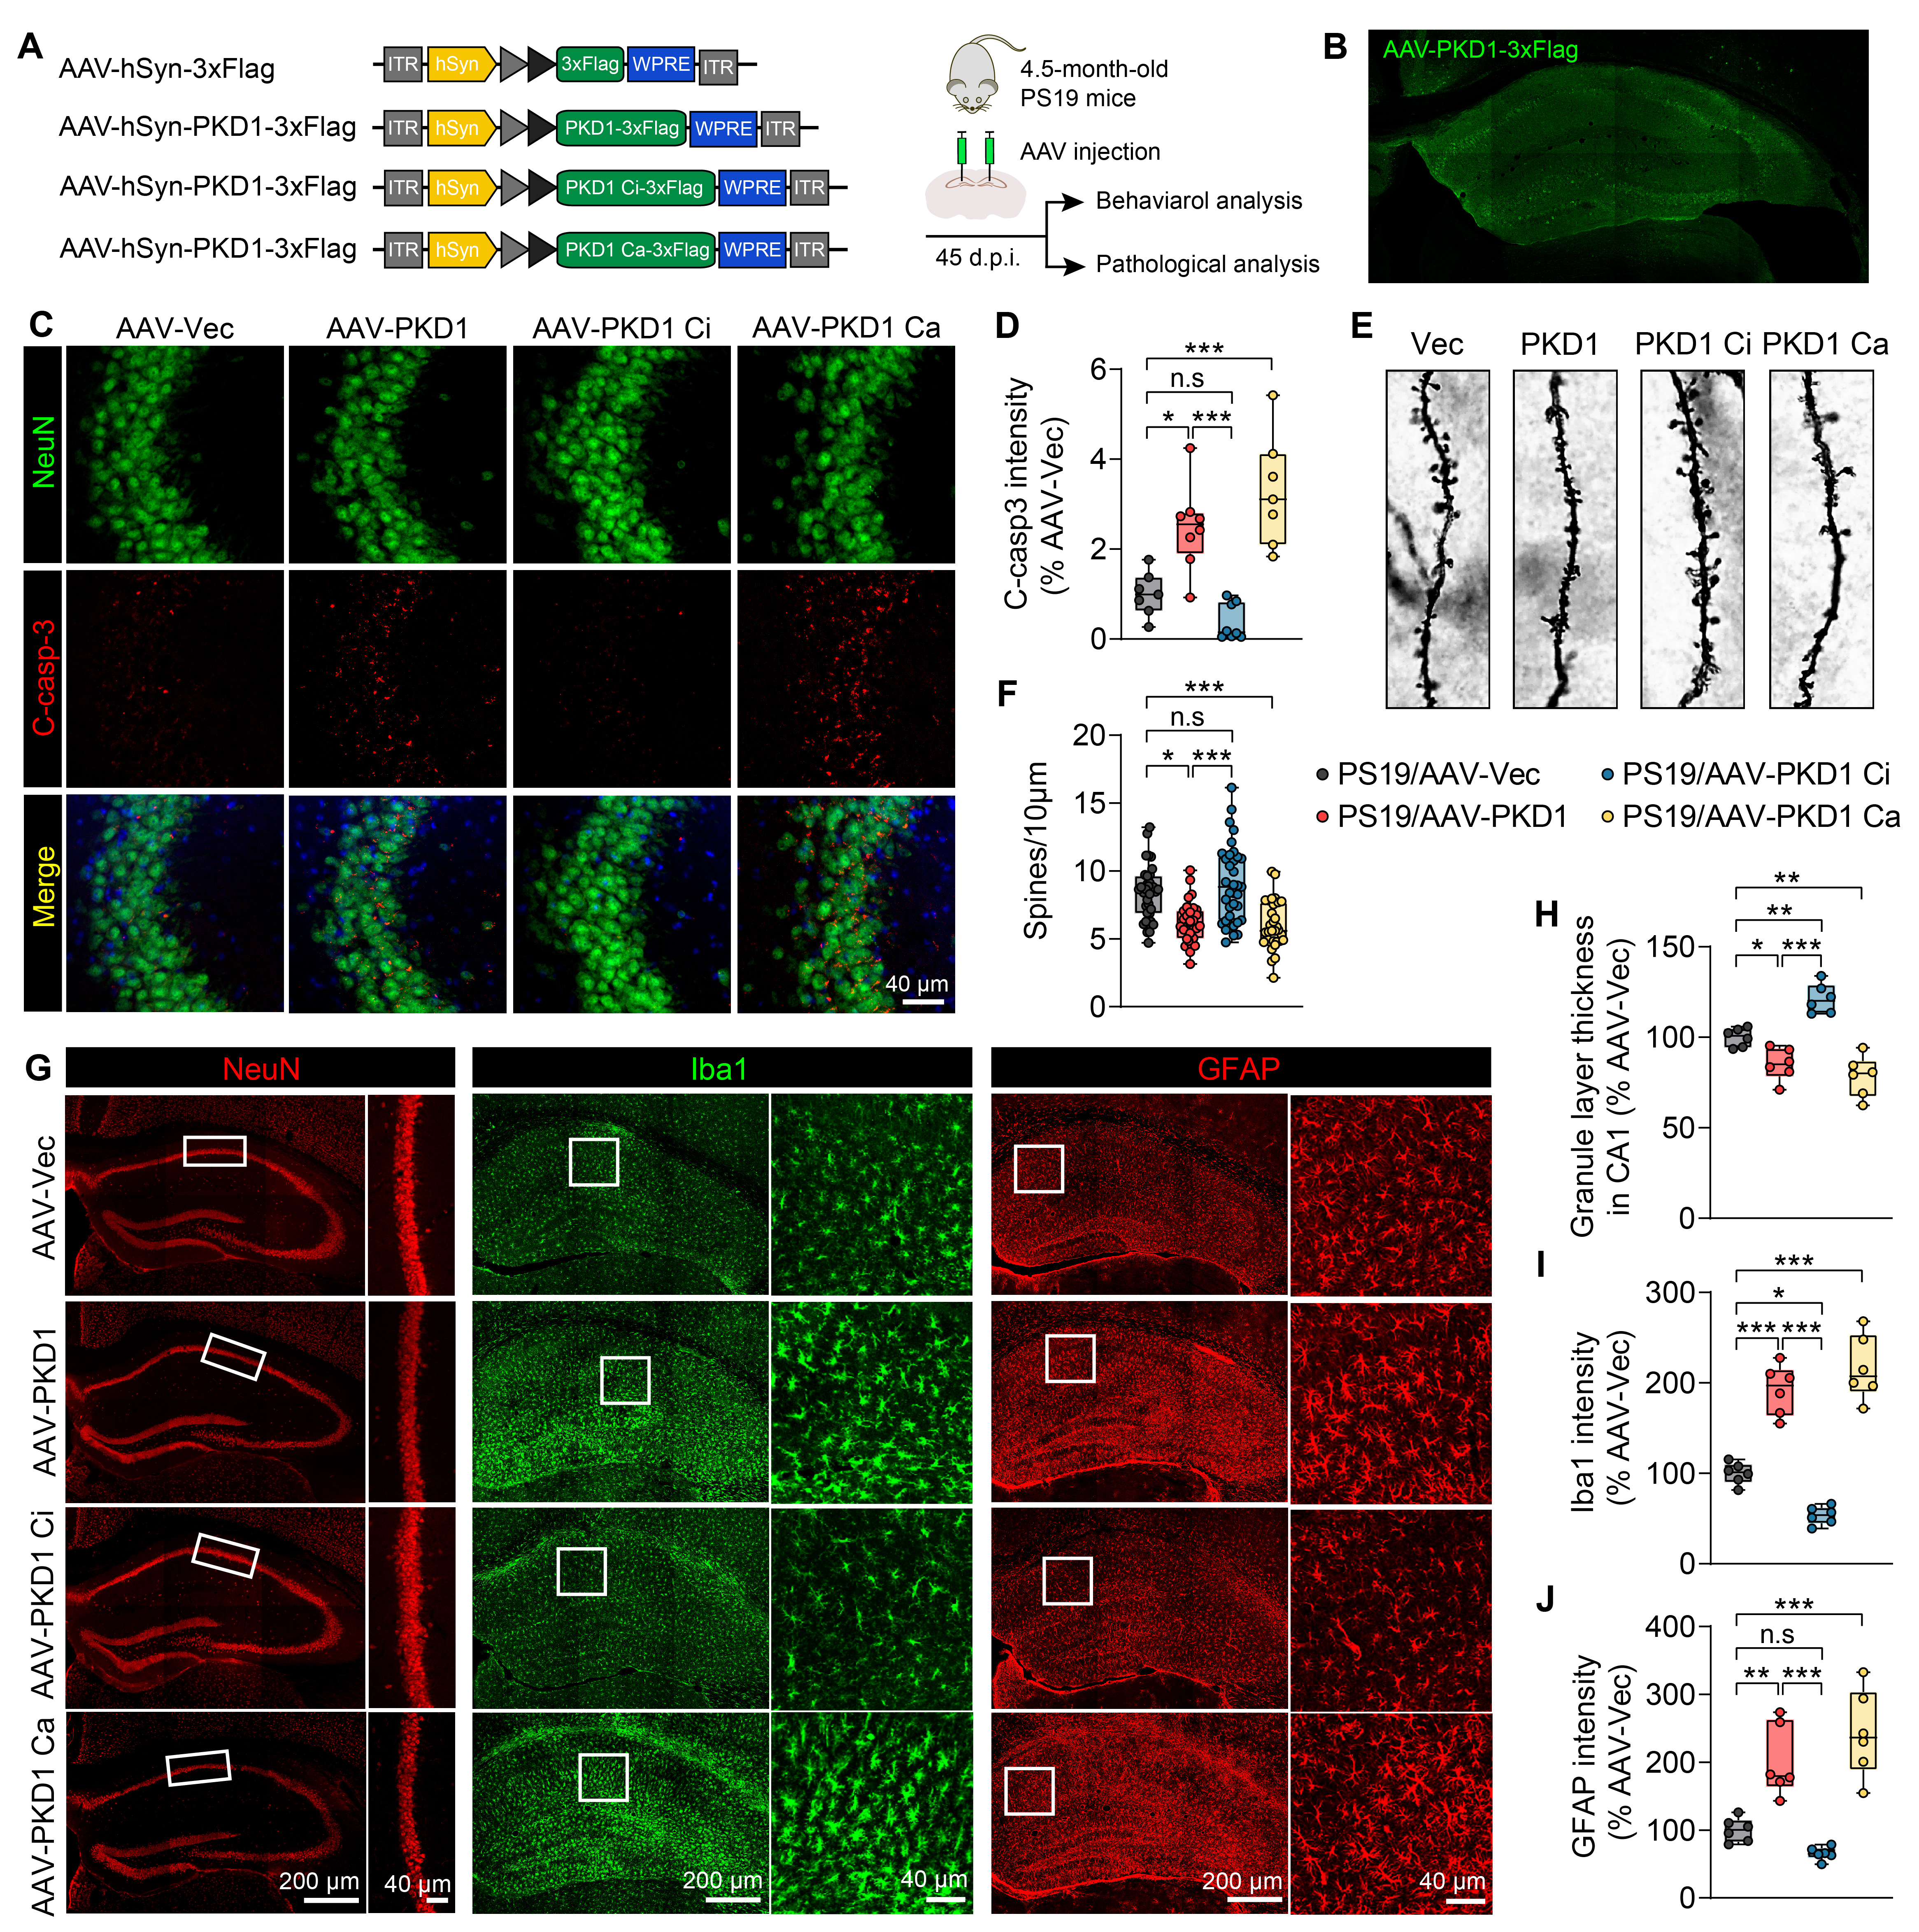


**Supplementary Figure 3 Overexpression of PKD1 exacerbates neuronal loss and gliosis in young PS19 mice.**

(**A**) Schematic illustration of AAVs constructed with PKD1 or PKD1 mutant and the in vivo experimental timeline. (**B**) Representative immunostaining images of Flag showing the expression of AAV in the hippocampus of PS19 mice. (**C** and **D**) Immunofluorescence staining analysis of cleaved Caspase-3 and neuronal nuclear antigen (NeuN) in the hippocampal CA3 of of 6-month-old PS19 mice after AAV injection. (**E** and **F**) Golgi staining analysis of dendritic spines from apical dendritic layer of the CA1 region. (**G-J**) Immunofluorescence staining analysis of NeuN, Glial fibrillary acidic protein (GFAP), and Ionized calcium binding adapter molecule 1 (Iba1) in the hippocampus of AAV-injected PS19mice. Statistical significance was determined by one-way ANOVA with Dunnett’s post hoc analysis. Data are shown as mean ± SEM, **p* < 0.05, ***p* < 0.01, ****p* < 0.001, n. s, not significant.


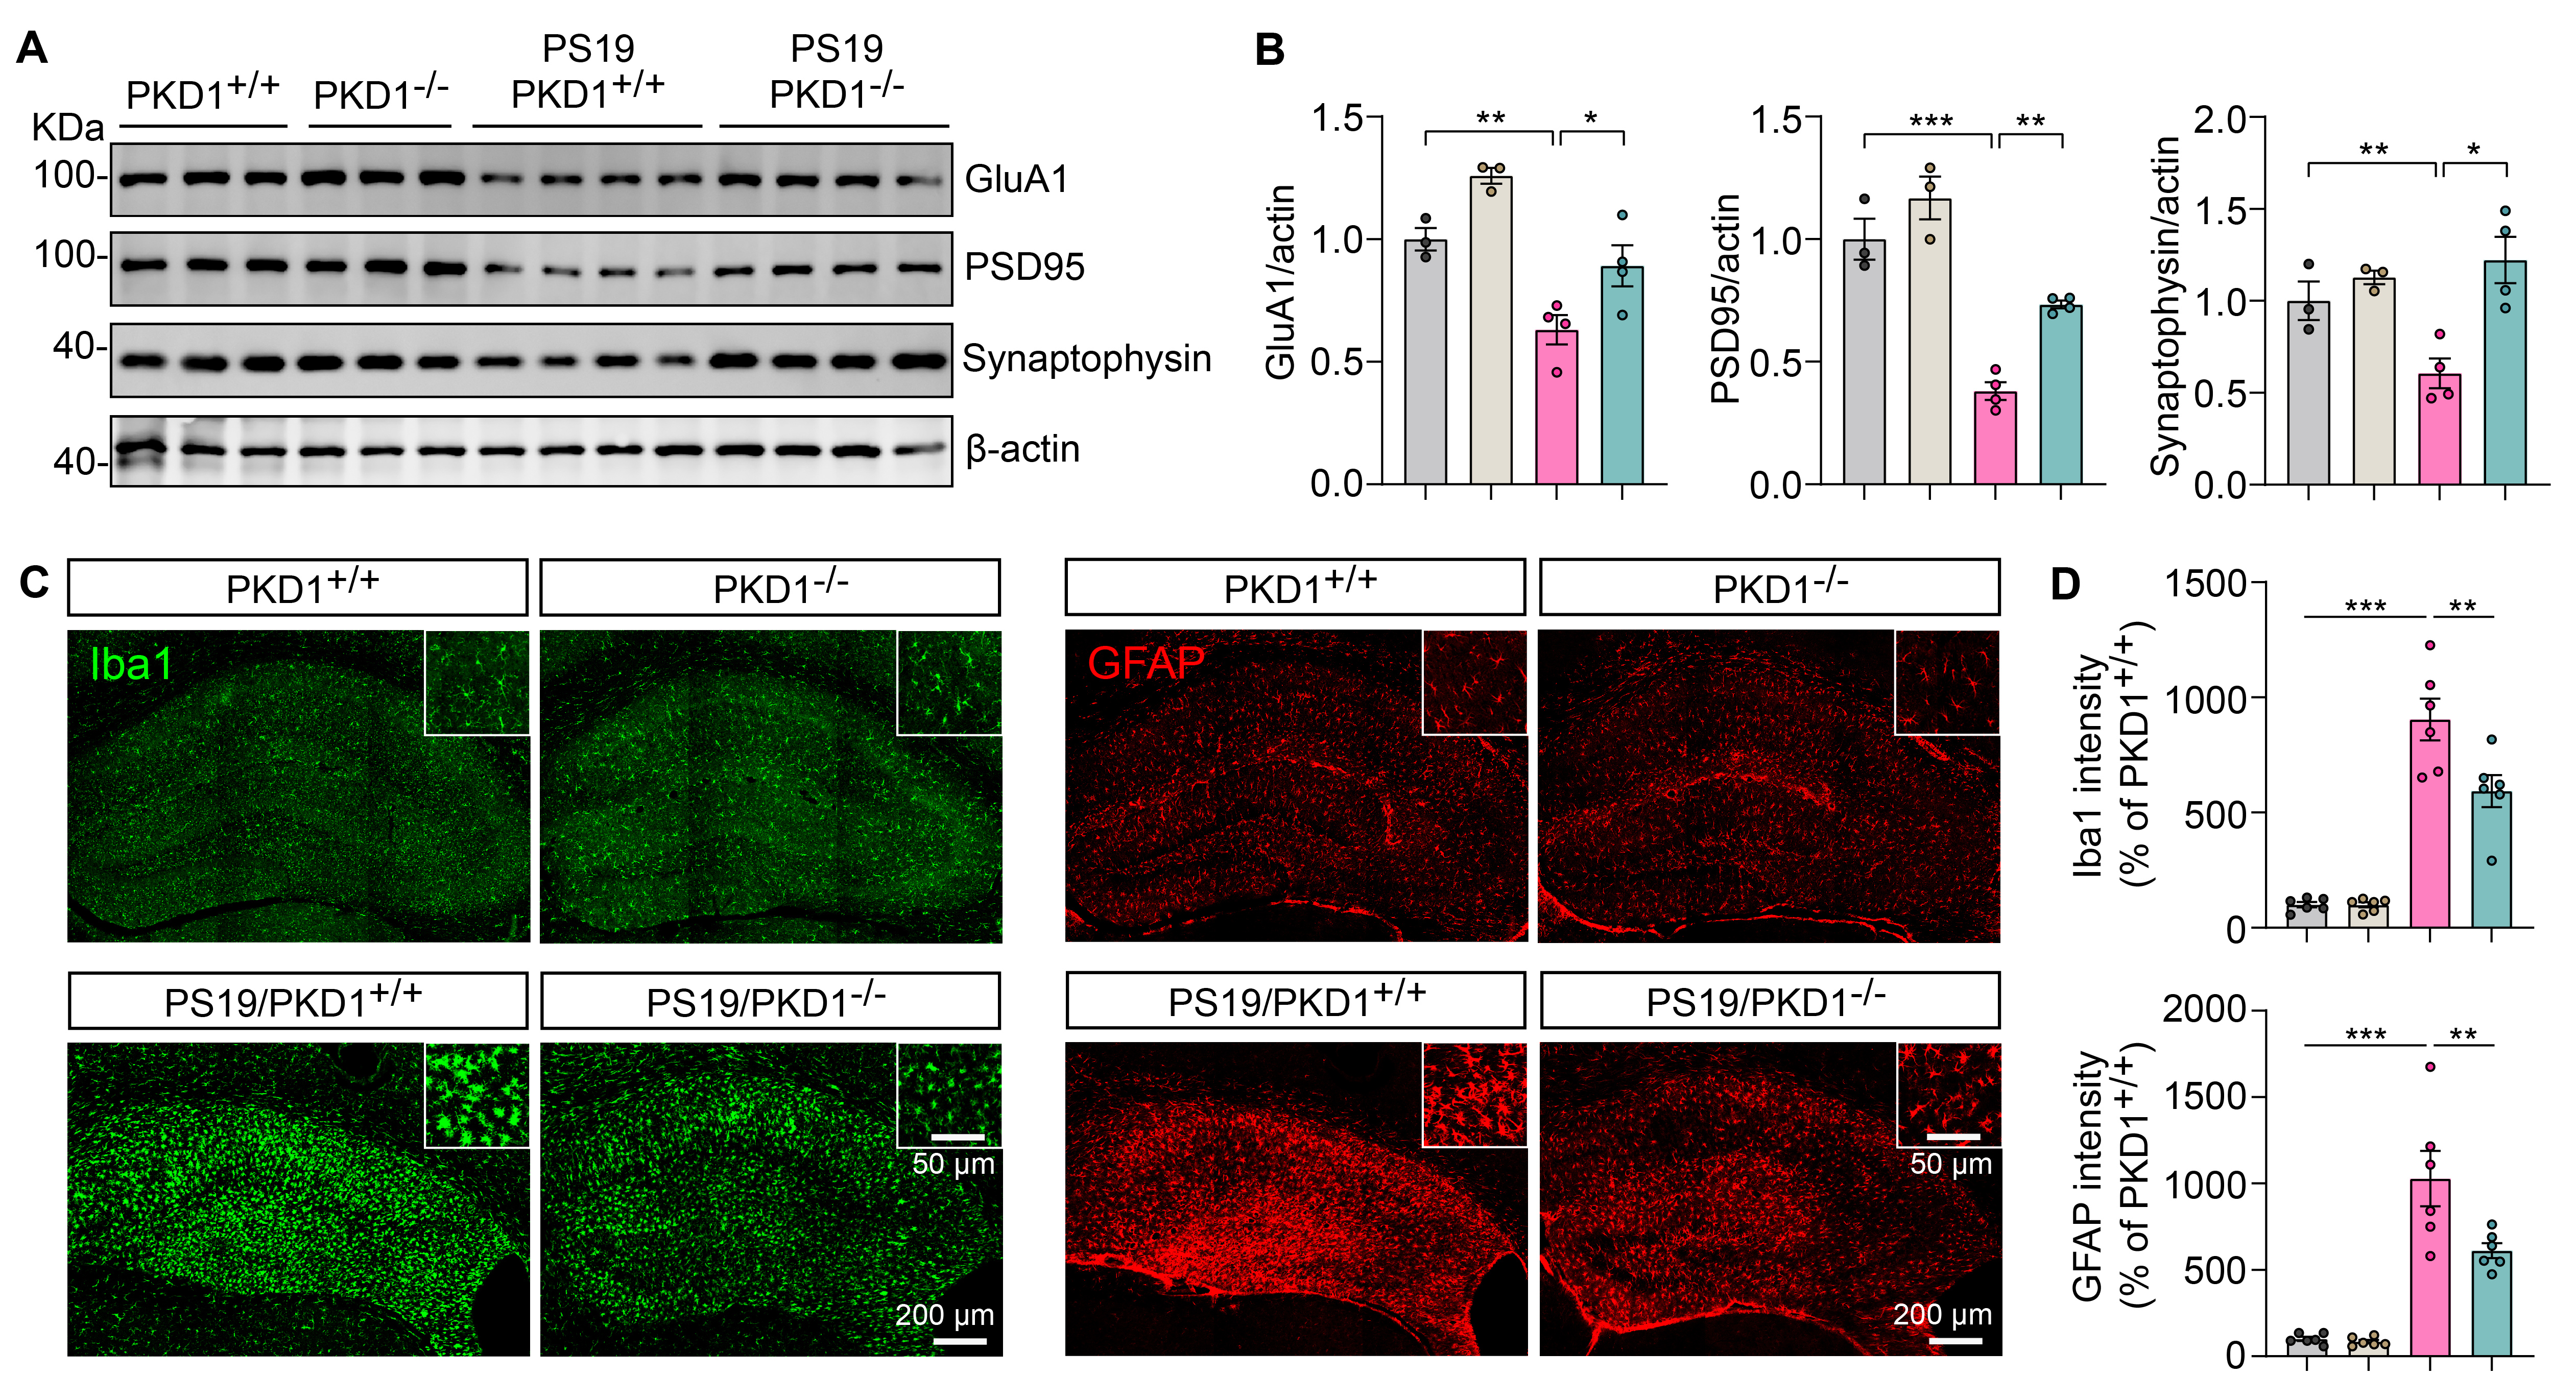


**Supplementary Figure 4 PKD1 deletion ameliorates synaptic protein loss and glial cell activation in PS19 mice.**

(**A** and **B**) Immunoblotting analysis of GluA1, PSD95 and synaptophysin protein in the hippocampal tissues from PKD1+/+, PS19/PKD1+/+ and PS19/PKD1-/- mice. n = 3-4 mice per group. (**C** and **D**) Immunofluorescence staining analysis of Iba1 and GFAP in the hippocampus of PKD1+/+, PS19/PKD1+/+ and PS19/PKD1-/- mice. n = 6 mice per group. Statistical significance was determined by one-way ANOVA with Dunnett’s post hoc analysis. Data are shown as mean ± SEM, **p* < 0.05, ***p* < 0.01, ****p* < 0.001, n. s, not significant.


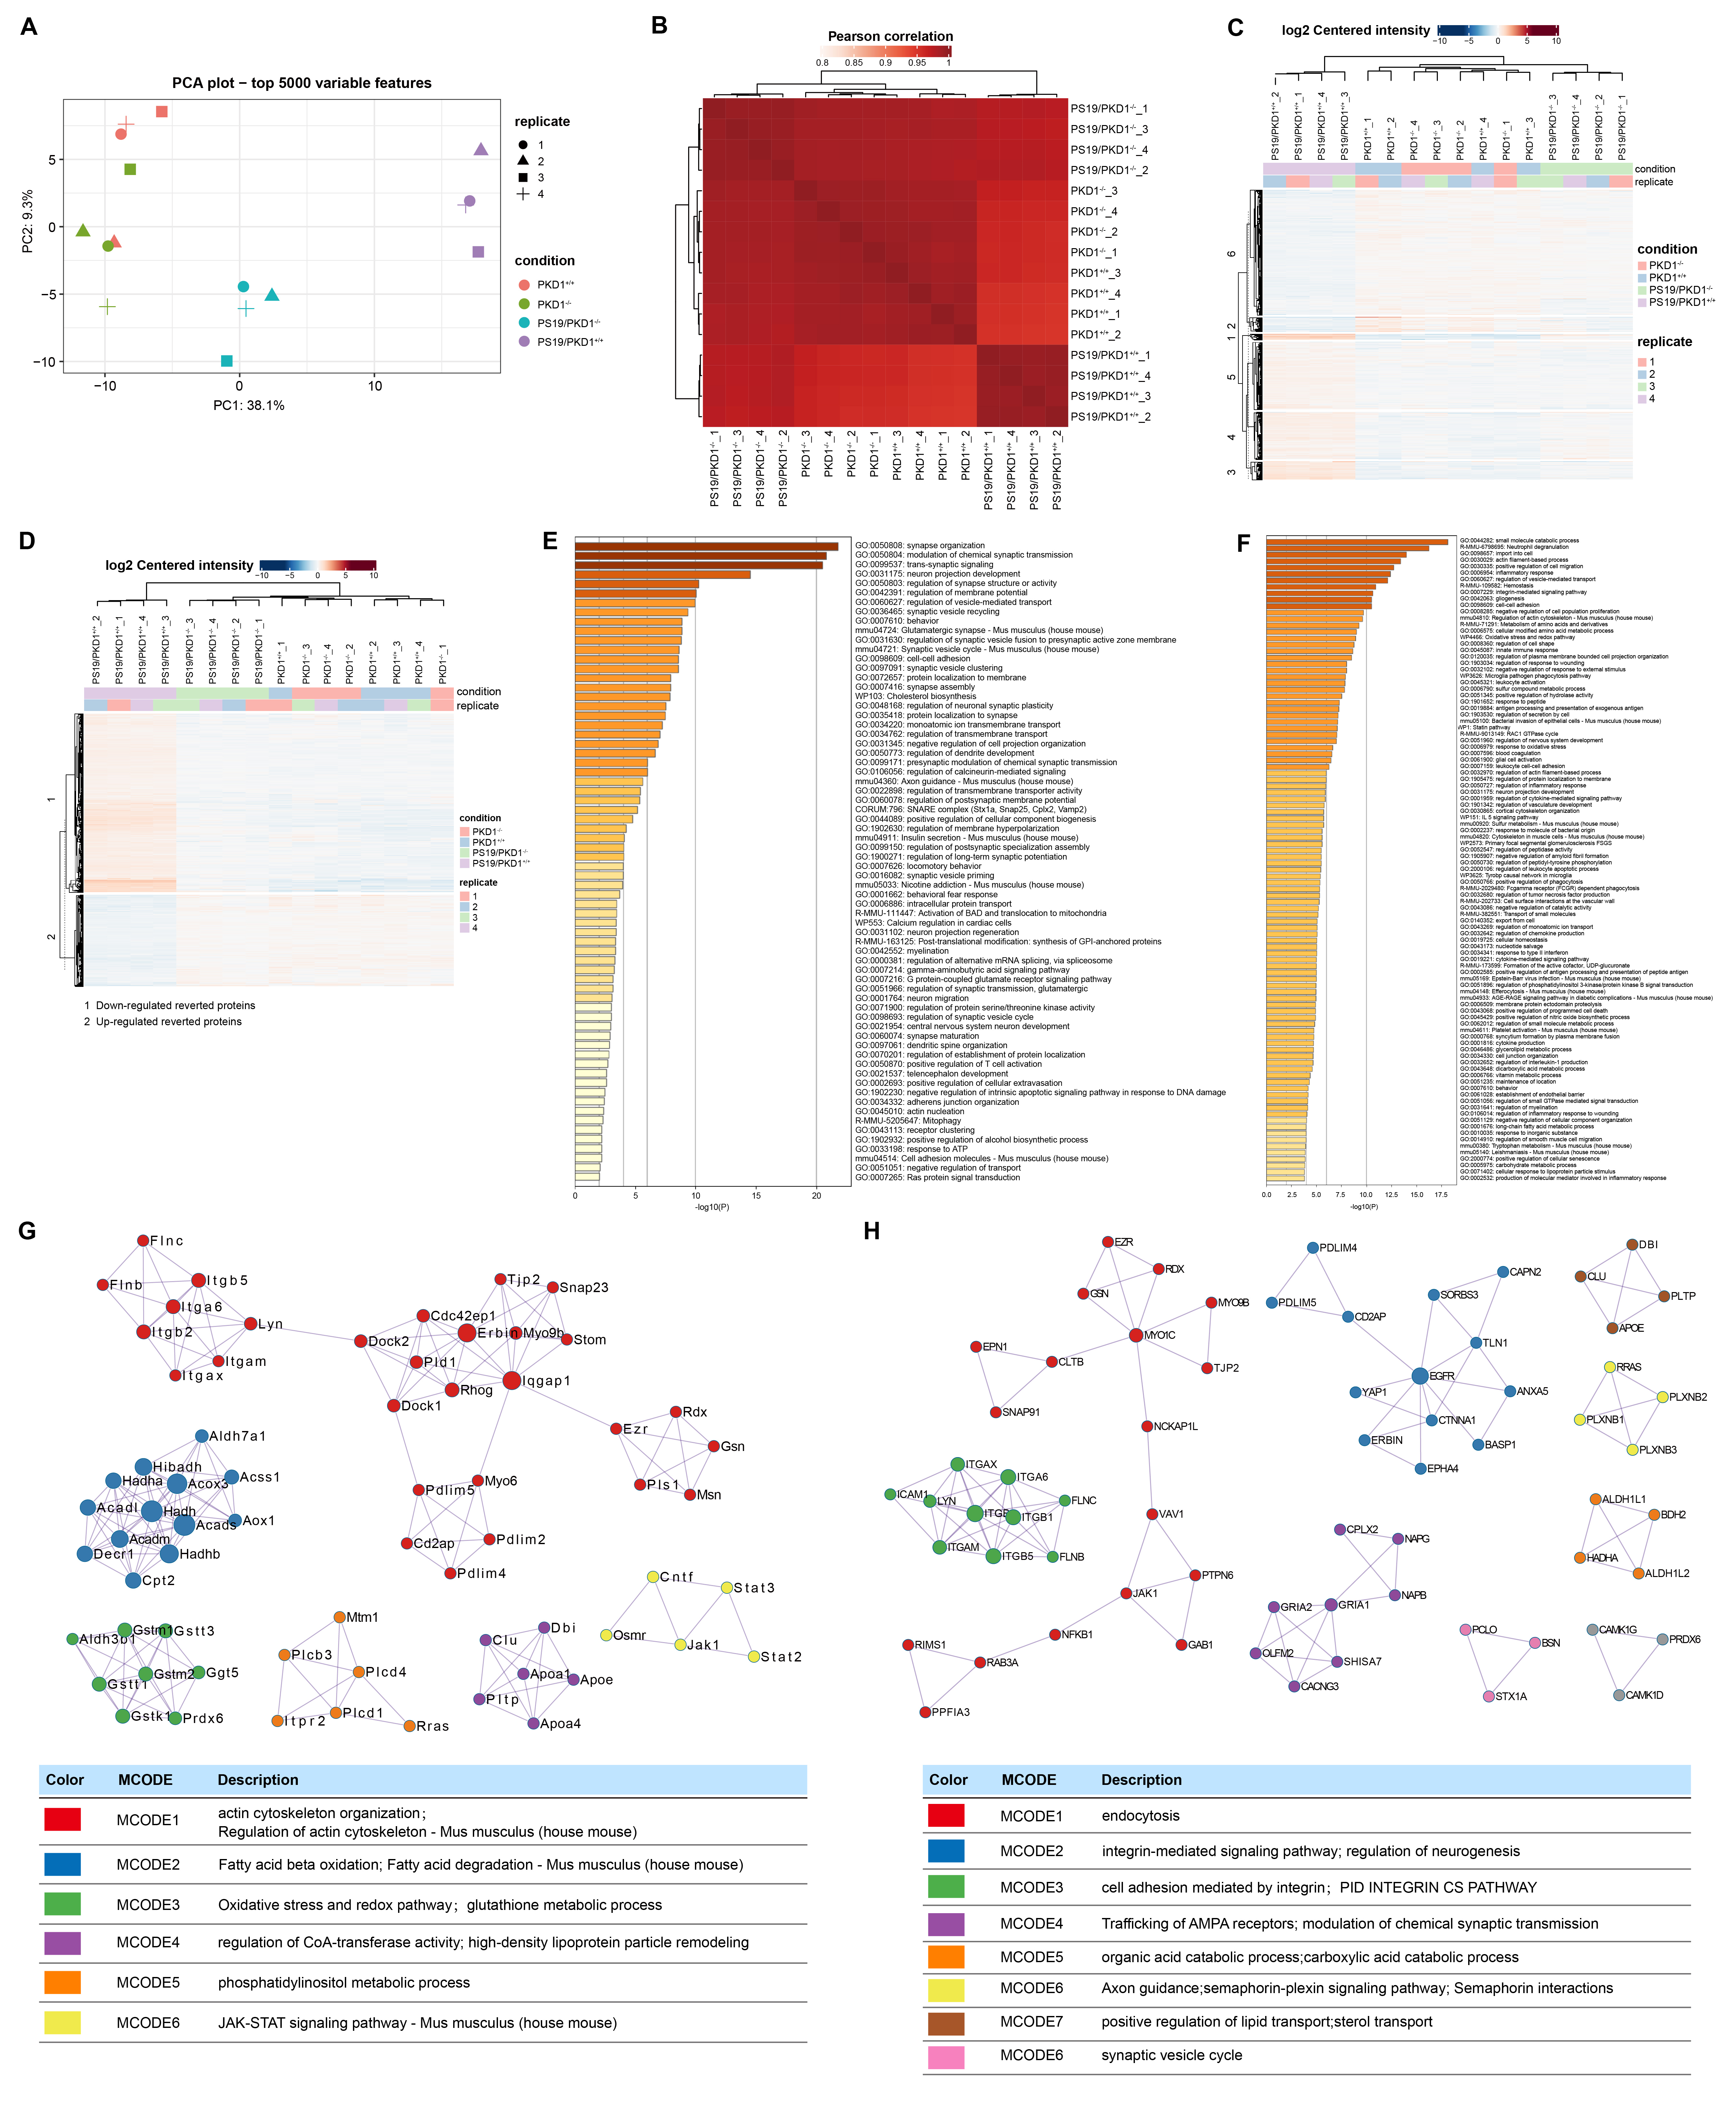


**Supplementary Figure 5 PKD1 deletion ameliorates protein dyshomeostasis in PS19 mice.**

(**A**) Principal component analysis (PCA) plot displays all samples based on the top 5000 variable proteins, utilizing the first two components: PC1, which accounts for 38.1% of the variance, and PC2, which accounts for 9.3% of the variance. (**B**) Heatmap showing visual correlations among different samples. (**C**) Heatmap illustrating the expression levels of all significantly differentially proteins (DEPs) identified across the four groups of mice. (**D**) Heatmap illustrating the expression levels of proteins with reversed expression patterns across all groups. The color bar represents the log2-centered expression intensity, where shades of red denote higher expression levels and shades of blue indicate lower protein levels. Clustering of columns suggests a closer association of samples, while clustering of rows indicates proteins with similar expression patterns. (**E**) Heatmap showing the top 100 enriched functional terms for up-regulated proteins with reversed expression due to PKD1 deletion in PS19 mice. (**F**) Heatmap showing the top 100 enriched functional terms for down-regulated proteins with reversed expression resulting from PKD1 deletion in PS19 mice. (**G**) Protein clusters identified by MCODE analysis of the protein-protein interaction network of down-regulated proteins with reversed expression pattern by PKD1 deletion. (**H**) Protein clusters identified by MCODE analysis of the 272 orthologous DEPs from the human AD-DEP dataset.
