# Supplementary material for: PKD1-tau disulfide linkage promotes tau phosphorylation and tau accumulation in a tauopathy mouse model
Source: Research Square preprint supplement (doi:10.21203/rs.3.rs-7655539/v1), 2025-10-13
Supplement: Supplementary file 4 [file 8f7444862fa5a03555f9b7c0.xlsx]

## Sheet: Table S2
PG.ProteinGroups	PG.Genes	PKD1+/+_1	PKD1+/+_2	PKD1+/+_3	PKD1+/+_4	PKD1-/-_1	PKD1-/-_2	PKD1-/-_3	PKD1-/-_4	PS19.PKD1+/+_1	PS19.PKD1+/+_2	PS19.PKD1+/+_3	PS19.PKD1+/+_4	PS19.PKD1-/-_1	PS19.PKD1-/-_2	PS19.PKD1-/-_3	PS19.PKD1-/-_4	imputed	num_NAs	PS19.PKD1+/+_vs_PKD1+/+_p.val	PS19.PKD1+/+_vs_PKD1+/+_p.adj	PS19.PKD1+/+_vs_PKD1+/+_ratio	PS19.PKD1-/-_vs_PS19.PKD1+/+_p.val	PS19.PKD1-/-_vs_PS19.PKD1+/+_p.adj	PS19.PKD1-/-_vs_PS19.PKD1+/+_ratio	PS19.PKD1-/-_vs_PKD1+/+_p.val	PS19.PKD1-/-_vs_PKD1+/+_p.adj	PS19.PKD1-/-_vs_PKD1+/+_ratio	PKD1-/-_centered	PKD1+/+_centered	PS19.PKD1-/-_centered	PS19.PKD1+/+_centered	PS19.PKD1+/+_vs_PKD1+/+_significant	PS19.PKD1-/-_vs_PS19.PKD1+/+_significant	PS19.PKD1-/-_vs_PKD1+/+_significant	significant
Q9Z0R9	Fads2	7.97297	7.68998	7.86924	7.7826	7.74491	7.68082	7.88857	7.80216	8.1238	8.12468	8.08033	8.06185	7.53128	7.6129	7.4668	7.52214	FALSE	0	0.000387804	0.00213	0.269	1.27e-07	7.42e-06	-0.564	0.000164791	0.0111	-0.295	-0.0306	0.019	-0.276	0.288	TRUE	TRUE	TRUE	TRUE
Q9Z0F4	Cib1	7.55588	7.40317	7.55935	7.58171	7.46209	7.81952	7.57246	7.53628	8.53877	8.48822	8.66105	8.50558	7.9017	8.04141	7.76125	7.79796	FALSE	0	2.69e-09	2.22e-07	1.02	5.36e-07	2.15e-05	-0.673	0.000500186	0.0188	0.351	-0.289	-0.362	-0.0111	0.662	TRUE	TRUE	TRUE	TRUE
Q9Z0E6	Gbp2	7.5724	7.37035	7.44364	7.53156	7.45924	7.75747	7.79477	7.54599	9.28846	9.27751	9.44903	9.33337	8.03898	8.12652	8.19009	8.56328	FALSE	0	3.51e-11	1.07e-08	1.86	3.25e-08	2.71e-06	-1.11	3.59e-06	0.00104	0.75	-0.532	-0.692	0.0583	1.17	TRUE	TRUE	TRUE	TRUE
Q9WVA4	Tagln2	9.43113	9.27706	9.3714	9.21116	9.3651	9.44569	9.5545	9.65363	10.2268	10.323	10.1669	10.2632	9.6887	9.68239	9.76563	9.68453	FALSE	0	5.04e-10	6.32e-08	0.922	4.75e-07	2.01e-05	-0.54	2.34e-05	0.00396	0.383	-0.19	-0.372	0.0109	0.551	TRUE	TRUE	TRUE	TRUE
Q9WUU7	Ctsz	5.99251	6.02917	5.90599	5.88749	6.00596	5.84602	6.03458	6.11295	7.21865	7.47049	7.06396	7.09169	6.18644	6.56389	6.57222	6.59253	FALSE	0	4.75e-09	3.55e-07	1.26	3.67e-06	9.55e-05	-0.732	0.000121975	0.00951	0.525	-0.411	-0.457	0.0679	0.8	TRUE	TRUE	TRUE	TRUE
Q9R233	Tapbp	7.68311	7.42489	7.38609	7.59898	7.48418	7.96208	8.02535	7.86638	9.12415	9.35401	9.21795	9.14922	8.25937	8.19704	8.12574	8.30865	FALSE	0	1.43e-10	2.73e-08	1.69	1.49e-07	8.37e-06	-0.989	8.6e-06	0.00208	0.699	-0.363	-0.675	0.0247	1.01	TRUE	TRUE	TRUE	TRUE
Q9R118	Htra1	7.34151	6.99695	6.96054	7.03682	7.00934	6.97084	7.00424	7.02508	8.23147	8.09034	8.27732	8.21362	7.2406	7.51977	7.57525	7.41402	FALSE	0	1.67e-09	1.52e-07	1.12	2.13e-07	1.13e-05	-0.766	0.00073359	0.0243	0.353	-0.429	-0.348	0.00568	0.771	TRUE	TRUE	TRUE	TRUE
Q9QUN7	Tlr2	6.79061	6.28526	6.72157	6.13021	6.60651	6.74868	6.74226	6.59022	8.5584	8.66948	8.79095	8.86263	7.38217	7.13377	7.25648	7.19168	TRUE	7	4.02e-11	1.17e-08	2.24	9.86e-09	1.1e-06	-1.48	2.7e-05	0.00427	0.759	-0.607	-0.797	-0.0378	1.44	TRUE	TRUE	TRUE	TRUE
Q9JLF6	Tgm1	7.51538	7.43207	7.35798	7.78534	7.37062	7.24444	7.19613	6.68758	8.66168	8.63007	8.70969	8.88267	6.83674	6.46747	6.57625	6.92512	TRUE	3	6.64e-07	1.47e-05	1.2	8.81e-10	2.13e-07	-2.02	4.45e-05	0.00483	-0.821	-0.393	0.00524	-0.816	1.2	TRUE	TRUE	TRUE	TRUE
Q9JKD3	Scamp5	11.6226	11.669	11.141	11.2606	11.2699	11.2876	11.3086	11.394	10.5305	10.6007	10.4452	10.6329	10.8681	10.9021	11.0996	11.1076	FALSE	0	6.61e-07	1.47e-05	-0.871	0.000725462	0.00532	0.442	0.000929314	0.0276	-0.429	0.244	0.352	-0.0769	-0.519	TRUE	TRUE	TRUE	TRUE
Q9ESM3	Hapln2	8.05519	8.661	8.03726	8.34812	7.87602	8.01949	7.97937	8.28132	9.38919	9.61454	9.45369	9.77638	8.84423	9.03948	9.08872	8.66353	FALSE	0	2.92e-07	7.92e-06	1.28	0.000415471	0.00346	-0.649	0.000515183	0.0191	0.634	-0.656	-0.42	0.214	0.863	TRUE	TRUE	TRUE	TRUE
Q9EPK8	Trpv4	5.08639	4.78793	4.70897	4.63165	5.15235	5.23581	5.67618	5.34429	5.87313	6.03291	5.40107	5.7599	5.24447	5.38855	5.42274	5.314	TRUE	2	5.47e-06	7.38e-05	0.963	0.00764739	0.033	-0.424	0.00144192	0.0322	0.539	0.0359	-0.513	0.0262	0.45	TRUE	TRUE	TRUE	TRUE
Q9DCW2	Plscr2	5.86811	5.74452	5.57178	5.60984	5.96515	6.01758	6.31516	6.19938	6.98455	7.20002	7.15146	7.18255	6.57656	5.86817	6.12109	6.31178	TRUE	4	1.67e-08	8.49e-07	1.43	4.07e-06	0.000104	-0.91	0.000978099	0.0281	0.521	-0.169	-0.594	-0.0736	0.837	TRUE	TRUE	TRUE	TRUE
Q9D7E4		6.90687	7.19328	7.2758	6.95551	7.20579	7.19119	7.58385	7.53828	7.30756	7.56362	7.36737	7.4602	7.9401	7.78953	7.88911	7.99587	FALSE	0	0.00528562	0.017	0.342	0.00039281	0.00331	0.479	1.48e-06	0.000605	0.821	-0.068	-0.365	0.456	-0.0231	TRUE	TRUE	TRUE	TRUE
Q9D6E4	Ttc9b	8.47171	8.27064	8.21161	8.20253	8.0132	8.14797	8.19172	8.03701	7.68574	7.5382	7.5057	7.62217	7.72668	8.07608	8.00249	8.10693	FALSE	0	6.64e-07	1.47e-05	-0.701	0.000328646	0.0029	0.39	0.00210731	0.0388	-0.311	0.109	0.301	-0.0101	-0.4	TRUE	TRUE	TRUE	TRUE
Q9D379	Ephx1	9.75954	9.65911	9.54138	9.5624	9.44213	9.45128	9.82869	9.64274	10.5567	10.6275	10.4834	10.5664	9.84595	9.97544	9.88501	9.89807	FALSE	0	7.23e-09	4.69e-07	0.928	5.42e-07	2.15e-05	-0.657	0.00321776	0.0469	0.271	-0.329	-0.29	-0.0192	0.638	TRUE	TRUE	TRUE	TRUE
Q9CZ52	Antxr1	6.31531	6.02289	6.19404	5.98053	6.52053	6.06858	6.55423	6.33756	6.854	6.90005	7.127	6.99569	6.49346	6.50846	6.75827	6.72145	TRUE	1	2.01e-06	3.42e-05	0.841	0.00643703	0.029	-0.349	0.000481573	0.0188	0.492	-0.152	-0.394	0.0984	0.447	TRUE	TRUE	TRUE	TRUE
Q99PI8	Rtn4r	9.09405	9.15511	8.9598	8.95453	8.68148	8.79152	8.71715	8.9356	8.48499	8.53828	8.31589	8.47539	8.56283	8.79124	8.81297	8.78188	FALSE	0	1.24e-06	2.34e-05	-0.587	0.0016533	0.0101	0.284	0.000963713	0.028	-0.304	0.0281	0.288	-0.0161	-0.3	TRUE	TRUE	TRUE	TRUE
Q99MX7	Tmem121b	9.37345	9.50561	9.42957	9.55085	9.36323	9.46206	9.29046	9.43734	8.52192	8.49125	8.62558	8.70379	9.10535	9.12942	9.28233	9.2346	FALSE	0	5.95e-10	7.2e-08	-0.879	7.98e-08	5.27e-06	0.602	0.000383531	0.0173	-0.277	0.232	0.308	0.0312	-0.571	TRUE	TRUE	TRUE	TRUE
Q99MB1	Tlr3	6.94284	6.4616	6.32526	6.2179	6.64308	6.77376	7.15084	7.06923	7.8286	7.8677	7.68682	7.6721	6.74363	7.18131	7.04087	7.12428	FALSE	0	6.3e-07	1.42e-05	1.28	0.000214264	0.00208	-0.741	0.00306777	0.046	0.536	-0.136	-0.559	-0.0231	0.718	TRUE	TRUE	TRUE	TRUE
Q921I1	Tf	12.2428	12.0933	11.8968	12.0234	11.9156	12.1974	12.3131	12.288	12.7728	12.8665	12.7339	12.7931	12.4027	12.6003	12.5638	12.4995	FALSE	0	6.56e-07	1.47e-05	0.728	0.00633902	0.0287	-0.275	0.000115457	0.0094	0.453	-0.209	-0.324	0.129	0.404	TRUE	TRUE	TRUE	TRUE
Q91YQ1	Rab29	7.91871	7.77219	7.85502	8.10974	7.74943	7.81945	7.98352	7.99102	9.05466	9.10373	9.10067	9.0674	8.06497	8.36853	8.22481	8.27241	FALSE	0	4.32e-10	5.6e-08	1.17	2.78e-08	2.41e-06	-0.849	0.00104934	0.0288	0.319	-0.393	-0.365	-0.0458	0.803	TRUE	TRUE	TRUE	TRUE
Q8K207		7.76195	7.82032	7.85223	7.86086	7.77813	7.91822	7.57014	7.90354	7.06941	7.29333	7.13635	7.12583	7.46959	7.51884	7.37698	7.41967	FALSE	0	1.48e-07	4.67e-06	-0.668	0.000948961	0.00655	0.29	8.86e-05	0.00825	-0.378	0.238	0.269	-0.108	-0.398	TRUE	TRUE	TRUE	TRUE
Q8C165	Pm20d1	7.81527	7.43487	7.69149	7.48958	7.8234	7.93109	7.69246	7.85246	8.76255	8.7808	8.73737	8.71736	7.75385	8.08169	8.04253	8.14465	FALSE	0	4.29e-09	3.31e-07	1.14	9.13e-07	3.2e-05	-0.744	0.000585273	0.0211	0.398	-0.222	-0.439	-0.0413	0.703	TRUE	TRUE	TRUE	TRUE
Q8BTM8	Flna	11.2593	10.9803	11.1423	11.053	11.2299	11.2816	11.5768	11.4712	12.0514	12.1341	11.8816	12.0871	11.3459	11.6077	11.4475	11.4377	FALSE	0	3.2e-08	1.37e-06	0.93	9.12e-06	0.000189	-0.579	0.00109891	0.0288	0.351	-0.109	-0.39	-0.0395	0.539	TRUE	TRUE	TRUE	TRUE
Q8BG07	Pld4	5.85059	5.52656	6.32376	6.14603	6.96453	6.32223	6.907	6.50356	7.51711	7.48708	7.4423	7.63074	6.79739	7.14181	6.78182	6.99473	FALSE	0	1.93e-07	5.65e-06	1.56	0.00315254	0.0168	-0.59	4.3e-05	0.00473	0.967	-0.0967	-0.809	0.158	0.748	TRUE	TRUE	TRUE	TRUE
Q810Q5	Nmes1	4.92692	4.81366	5.32211	5.00452	5.06686	5.24544	5.60341	4.75148	6.83758	6.46872	6.74077	6.83305	5.97406	6.06791	5.67297	5.79497	FALSE	0	3.84e-08	1.57e-06	1.7	0.000114028	0.00128	-0.843	9.27e-05	0.00832	0.861	-0.528	-0.678	0.182	1.02	TRUE	TRUE	TRUE	TRUE
Q7TN60	Tmc6	5.9564	5.74266	6.37992	5.74575	6.15781	6.4593	6.25062	6.08362	7.10489	7.19855	7.32974	7.31199	6.50499	6.46767	6.2472	6.46943	FALSE	0	6.12e-08	2.36e-06	1.28	1.27e-05	0.000242	-0.814	0.00215605	0.0392	0.466	-0.225	-0.507	-0.0408	0.773	TRUE	TRUE	TRUE	TRUE
Q6Q899	Ddx58	5.62917	5.43627	5.99588	5.41418	5.90834	5.87079	6.25373	6.12027	6.94799	7.13239	6.88695	6.96536	6.11475	6.28685	6.12588	6.23198	FALSE	0	1.17e-08	6.51e-07	1.36	8.16e-06	0.000174	-0.793	0.000229806	0.0134	0.571	-0.169	-0.589	-0.0177	0.776	TRUE	TRUE	TRUE	TRUE
Q64345	Ifit3	7.58905	7.77484	7.80491	7.42755	7.57658	7.57604	7.99784	7.63248	10.1988	10.2695	10.4673	10.3077	8.54991	8.74851	8.61146	8.70388	FALSE	0	2.35e-13	2.85e-10	2.66	1.54e-10	5.33e-08	-1.66	1.05e-07	9.5e-05	1	-0.882	-0.928	0.0762	1.73	TRUE	TRUE	TRUE	TRUE
Q64339	Isg15	7.78261	7.82798	7.96874	7.84257	7.8938	8.21641	8.22695	8.24305	9.47643	9.55201	9.45819	9.26349	8.48642	8.42275	8.48545	8.65131	FALSE	0	1.63e-11	7.15e-09	1.58	2e-08	1.89e-06	-0.926	1.39e-06	0.000605	0.656	-0.342	-0.632	0.0241	0.95	TRUE	TRUE	TRUE	TRUE
Q64282	Ifit1	6.86884	5.86916	6.78256	6.44625	6.6478	6.93938	7.09675	7.14694	8.09255	8.15767	8.04068	7.95955	6.90095	7.34395	7.05769	7.19639	FALSE	0	4.46e-07	1.1e-05	1.57	0.000125512	0.00139	-0.938	0.00332382	0.0473	0.633	-0.201	-0.667	-0.0344	0.903	TRUE	TRUE	TRUE	TRUE
Q61885	Mog	12.8647	12.9517	12.852	12.8034	12.7946	12.8581	12.6039	12.7558	13.4818	13.3787	13.488	13.4676	13.0104	13.1875	13.1856	13.1436	FALSE	0	5.3e-08	2.08e-06	0.586	5.15e-05	0.000695	-0.322	0.00034647	0.0166	0.264	-0.299	-0.184	0.0801	0.402	TRUE	TRUE	TRUE	TRUE
Q61790	Lag3	5.60373	5.80804	5.66621	5.49047	5.81982	5.02648	6.2758	5.76779	7.81738	7.65187	7.9022	7.89517	6.18325	6.20725	6.33573	6.55812	TRUE	4	1.36e-08	7.24e-07	2.17	1.37e-06	4.36e-05	-1.5	0.00279187	0.0441	0.679	-0.653	-0.733	-0.0545	1.44	TRUE	TRUE	TRUE	TRUE
Q61703	Itih2	8.66069	8.7078	8.66795	8.68292	8.6011	8.76298	8.82758	8.73397	9.46485	9.57805	9.19128	9.28974	9.06971	9.19193	9.07862	9.05317	FALSE	0	1.15e-07	3.91e-06	0.701	0.00145845	0.00917	-0.283	4.18e-05	0.00468	0.419	-0.241	-0.293	0.126	0.408	TRUE	TRUE	TRUE	TRUE
Q61646	Hp	6.95344	6.84704	6.55101	6.74899	6.48726	6.69782	6.96955	6.83569	7.26198	7.11029	7.31327	7.15123	7.75503	7.87136	7.87759	7.74311	FALSE	0	0.000569088	0.00285	0.434	2.48e-05	0.000395	0.603	4.35e-08	6.54e-05	1.04	-0.388	-0.361	0.676	0.0733	TRUE	TRUE	TRUE	TRUE
Q61107	Gbp4	7.42592	6.99689	7.18571	7.14175	7.21281	7.31472	7.68414	7.6435	8.41692	8.42698	8.3668	8.36039	7.52775	7.53519	7.58312	7.6402	FALSE	0	8.96e-09	5.47e-07	1.21	1.05e-06	3.51e-05	-0.821	0.0018984	0.0373	0.384	-0.19	-0.466	-0.0824	0.739	TRUE	TRUE	TRUE	TRUE
Q60629	Epha5	9.61865	9.66379	9.39074	9.64963	9.49743	9.38002	9.3612	9.55268	8.98845	9.10951	8.96709	8.97913	9.26044	9.1198	9.51066	9.30005	FALSE	0	4.93e-06	6.86e-05	-0.57	0.00296431	0.016	0.287	0.00325281	0.0469	-0.283	0.114	0.246	-0.0366	-0.323	TRUE	TRUE	TRUE	TRUE
Q5NBU8	Xaf1	7.53036	7.53852	7.76917	7.74401	7.85607	7.78138	7.74235	8.16246	9.29407	9.2116	9.29858	8.98893	8.09607	8.27083	8.28796	8.21471	TRUE	2	1.58e-10	2.8e-08	1.55	6.37e-08	4.41e-06	-0.981	3.29e-05	0.00443	0.572	-0.351	-0.591	-0.0193	0.962	TRUE	TRUE	TRUE	TRUE
Q5EBG6	Hspb6	6.01766	6.17776	6.18304	6.13802	5.63091	6.22252	5.77708	6.24297	7.06533	7.16681	6.92092	7.19992	6.5488	6.54423	6.64918	6.51396	TRUE	9	8.77e-07	1.79e-05	0.959	0.000472373	0.0038	-0.524	0.002131	0.0391	0.435	-0.469	-0.308	0.127	0.651	TRUE	TRUE	TRUE	TRUE
Q3V0I2	Prr7	7.58176	7.29251	7.22413	7.0697	7.03738	7.30421	7.1778	7.3815	6.21786	6.58859	6.46157	6.71341	6.8281	6.89584	6.82529	6.8485	FALSE	0	5.29e-06	7.21e-05	-0.797	0.00711451	0.0312	0.354	0.00148708	0.0326	-0.443	0.26	0.327	-0.116	-0.47	TRUE	TRUE	TRUE	TRUE
Q3UMF0	Cobll1	6.74078	6.68115	6.72791	6.71542	6.50199	6.84858	7.04687	6.9656	7.33355	7.51778	7.3634	7.52753	7.16155	7.31365	7.05397	7.09832	FALSE	0	2.67e-06	4.28e-05	0.719	0.0113068	0.0448	-0.279	0.000402001	0.0177	0.441	-0.197	-0.321	0.119	0.398	TRUE	TRUE	TRUE	TRUE
Q07797	Lgals3bp	7.30281	7.06188	7.72272	7.41783	7.87533	7.84776	7.9673	8.14719	8.93258	9.01856	8.79512	8.8485	8.18757	8.34767	8.30451	8.30375	FALSE	0	1.22e-09	1.25e-07	1.52	6.34e-05	0.000808	-0.613	8.22e-07	0.000459	0.91	-0.171	-0.754	0.156	0.769	TRUE	TRUE	TRUE	TRUE
Q04758	Pkib	6.4043	6.45305	6.44163	6.69762	6.9178	6.78767	6.90262	6.91594	6.21303	5.97301	6.41038	6.11629	6.66672	6.88132	6.93479	6.81076	FALSE	0	0.00273383	0.01	-0.321	3.81e-06	9.85e-05	0.645	0.0025398	0.0425	0.324	0.286	-0.0963	0.228	-0.417	TRUE	TRUE	TRUE	TRUE
Q02105	C1qc	10.288	10.5041	10.2556	10.343	10.3805	10.3682	10.4558	10.2867	12.3939	12.4465	12.4075	12.4637	10.7874	10.764	10.8579	10.9358	FALSE	0	1.49e-15	8.11e-12	2.08	6.24e-14	4.53e-10	-1.59	4.06e-07	0.000268	0.489	-0.623	-0.648	-0.16	1.43	TRUE	TRUE	TRUE	TRUE
P98086	C1qa	9.07762	9.23816	9.18425	9.07106	9.08625	9.08351	9.02925	9.0743	11.122	10.9691	11.0081	11.1701	9.53016	9.46692	9.73737	9.68293	FALSE	0	2.61e-14	6.31e-11	1.92	1.17e-12	2.19e-09	-1.46	3.53e-06	0.00104	0.462	-0.652	-0.578	-0.116	1.35	TRUE	TRUE	TRUE	TRUE
P97429	Anxa4	8.21757	8.11689	8.07191	8.03565	8.00589	8.10477	8.24362	8.36802	9.14797	9.26792	9.11906	9.18051	8.34152	8.4617	8.42223	8.27997	FALSE	0	4.03e-10	5.32e-08	1.07	1.71e-08	1.68e-06	-0.803	0.00206858	0.0385	0.266	-0.281	-0.351	-0.0852	0.717	TRUE	TRUE	TRUE	TRUE
P70452	Stx4	7.95981	8.21907	8.18269	7.9893	8.09189	8.01974	8.20396	8.09526	8.70988	8.65985	8.67159	8.65467	8.23604	8.43759	8.31666	8.42849	FALSE	0	2.32e-07	6.54e-06	0.586	0.000180366	0.00183	-0.319	0.000869933	0.0264	0.267	-0.202	-0.217	0.0499	0.369	TRUE	TRUE	TRUE	TRUE
P63254	Crip1	9.45298	9.39043	9.70674	9.51651	10.244	10.1162	10.299	10.0522	10.0329	10.3219	10.1427	10.3205	9.73859	10.0286	9.66077	10.0337	FALSE	0	7.26e-06	9.17e-05	0.688	0.0043569	0.0216	-0.339	0.0035936	0.049	0.349	0.237	-0.424	-0.0757	0.263	TRUE	TRUE	TRUE	TRUE
P51910	Apod	8.51829	8.74409	8.65833	8.70825	8.69945	8.72868	8.70841	8.47515	10.5498	10.6008	10.4421	10.3276	8.87677	9.11516	8.93804	9.12697	FALSE	0	1.4e-12	1.27e-09	1.82	2.77e-11	1.83e-08	-1.47	0.00049604	0.0188	0.357	-0.548	-0.544	-0.187	1.28	TRUE	TRUE	TRUE	TRUE
P49935	Ctsh	7.13452	6.79679	6.69058	6.9138	6.9271	7.05794	7.19891	7.05441	8.14135	8.04148	8.07213	8.30142	7.26932	7.44019	7.55696	7.45835	FALSE	0	1.78e-09	1.58e-07	1.26	2.25e-06	6.55e-05	-0.708	3.76e-05	0.00468	0.547	-0.319	-0.495	0.0528	0.761	TRUE	TRUE	TRUE	TRUE
P48302	Ednrb	7.35439	7.84034	7.91188	7.78346	7.90473	7.86783	7.94192	7.74454	7.46045	7.51945	7.27294	7.21866	6.90156	6.66063	7.05816	7.26537	FALSE	0	0.0168133	0.0431	-0.355	0.00893311	0.0374	-0.396	4.94e-05	0.00505	-0.751	0.383	0.241	-0.51	-0.114	TRUE	TRUE	TRUE	TRUE
P42225	Stat1	8.69425	8.62562	8.71412	8.5766	8.73528	8.91938	8.81065	8.82203	9.68525	9.74512	9.68952	9.63793	8.89409	9.01968	9.00065	9.0471	FALSE	0	2.57e-12	1.87e-09	1.04	5.4e-10	1.53e-07	-0.699	4.71e-06	0.00124	0.338	-0.217	-0.386	-0.0482	0.651	TRUE	TRUE	TRUE	TRUE
P28063	Psmb8	7.12591	7.30132	7.34236	7.04773	7.35254	7.46613	7.50031	7.4054	8.19842	8.33355	8.27681	8.3396	7.75564	7.63658	7.5713	7.51037	FALSE	0	2.23e-10	3.47e-08	1.08	1.17e-07	6.93e-06	-0.669	2.9e-05	0.0043	0.414	-0.204	-0.431	-0.0168	0.652	TRUE	TRUE	TRUE	TRUE
P21981	Tgm2	8.18945	8.00036	7.99828	8.05204	8.00627	8.13799	8.21226	8.05752	8.63593	8.57103	8.5673	8.67112	8.22536	8.37975	8.42716	8.33394	FALSE	0	1.47e-07	4.63e-06	0.551	0.000340684	0.00297	-0.27	0.000231732	0.0134	0.282	-0.176	-0.219	0.0624	0.332	TRUE	TRUE	TRUE	TRUE
P20152	Vim	13.1084	12.9754	12.9735	12.9492	12.8863	13.0502	13.1847	13.1384	14.7234	14.7246	14.6317	14.7679	13.4099	13.4496	13.5053	13.537	FALSE	0	6.9e-14	1.25e-10	1.71	6.1e-12	7.38e-09	-1.24	1.5e-06	0.000605	0.474	-0.499	-0.562	-0.088	1.15	TRUE	TRUE	TRUE	TRUE
P16045	Lgals1	12.3433	12.2494	12.1909	12.1524	12.1162	12.2669	12.4397	12.4255	13.1424	13.2544	13.0471	13.1541	12.5231	12.5261	12.5451	12.5691	FALSE	0	1.63e-09	1.52e-07	0.916	2.96e-07	1.42e-05	-0.609	0.000434274	0.0181	0.307	-0.247	-0.325	-0.0183	0.59	TRUE	TRUE	TRUE	TRUE
P14106	C1qb	9.91267	9.91232	9.85292	9.63178	9.86014	9.66667	9.91196	9.69975	11.5381	11.4525	11.4847	11.4052	10.0851	9.9793	10.1328	10.2108	FALSE	0	1.66e-12	1.34e-09	1.64	2.04e-11	1.64e-08	-1.37	0.00197585	0.038	0.275	-0.511	-0.469	-0.194	1.17	TRUE	TRUE	TRUE	TRUE
P13634	Ca1	8.84471	8.63929	8.60889	8.43272	8.66559	8.89161	8.99412	9.1344	9.61611	9.65075	9.62736	9.50859	9.11966	9.15003	9.13402	9.28283	FALSE	0	5.35e-08	2.09e-06	0.969	0.000405119	0.00339	-0.429	4.53e-05	0.00484	0.54	-0.16	-0.45	0.0903	0.519	TRUE	TRUE	TRUE	TRUE
P07724	Alb	15.0148	14.6782	14.6118	14.5959	14.5973	14.7661	15.1463	15.0286	15.5827	15.5554	15.5469	15.5199	15.045	15.2459	15.1732	15.2272	FALSE	0	2.73e-06	4.33e-05	0.826	0.00397383	0.0201	-0.378	0.00114062	0.0289	0.448	-0.199	-0.358	0.0894	0.468	TRUE	TRUE	TRUE	TRUE
P07356	Anxa2	9.83371	9.5351	9.63029	9.53722	9.47616	9.71018	9.96008	9.98634	10.6627	10.6685	10.5897	10.6082	10.0086	10.0629	10.1125	10.0865	FALSE	0	4.79e-08	1.92e-06	0.998	3.55e-05	0.000524	-0.565	0.000442619	0.0183	0.434	-0.246	-0.395	0.0383	0.603	TRUE	TRUE	TRUE	TRUE
P06800	Ptprc	6.63755	6.7185	6.41085	6.87271	6.68054	6.86698	6.82582	6.92338	7.77614	7.7194	7.73467	7.94891	7.23348	7.19838	6.91452	7.20619	FALSE	0	9.91e-09	5.77e-07	1.13	7.46e-06	0.000162	-0.657	0.000191031	0.0121	0.478	-0.28	-0.444	0.0339	0.691	TRUE	TRUE	TRUE	TRUE
P04919	Slc4a1	10.3718	10.076	10.0879	9.95368	10.1181	10.4997	10.6367	10.6854	11.1147	11.1289	11.0576	10.9029	10.5837	10.6176	10.6373	10.8125	FALSE	0	1.09e-06	2.11e-05	0.929	0.00433717	0.0216	-0.388	0.00031991	0.016	0.54	-0.0953	-0.458	0.0825	0.471	TRUE	TRUE	TRUE	TRUE
P03995	Gfap	13.6774	13.6551	13.441	13.5708	13.3615	13.6455	13.3845	13.4088	15.6028	15.534	15.577	15.6775	13.9252	13.9132	14.1604	14.1138	FALSE	0	1.73e-13	2.51e-10	2.01	5.3e-12	7.38e-09	-1.57	3.97e-05	0.00468	0.442	-0.715	-0.579	-0.137	1.43	TRUE	TRUE	TRUE	TRUE
P01878		6.95316	6.87813	6.37427	7.05268	6.48915	6.82609	7.27496	7.07182	8.93871	8.54288	8.87767	9.19959	7.46216	7.81928	7.56568	7.30501	FALSE	0	2.35e-08	1.09e-06	2.08	4.21e-06	0.000107	-1.35	0.00169353	0.0349	0.723	-0.624	-0.725	-0.00142	1.35	TRUE	TRUE	TRUE	TRUE
P01868	Ighg1	6.66326	6.24196	5.99363	6.07171	5.95638	6.88967	6.43313	6.77526	9.0126	8.82051	9.52777	8.95127	7.84314	8.36639	8.02995	8.16854	FALSE	0	1.8e-09	1.58e-07	2.84	0.000366656	0.00313	-0.976	3.83e-07	0.000268	1.86	-0.97	-1.24	0.618	1.59	TRUE	TRUE	TRUE	TRUE
P01864		8.01025	7.88122	7.83343	7.96295	7.99156	8.87057	8.92898	9.04716	10.3007	10.4549	10.149	10.1546	9.47622	9.87821	9.86137	9.63114	FALSE	0	2.87e-09	2.31e-07	2.34	0.00811036	0.0346	-0.553	9.04e-08	9.38e-05	1.79	-0.442	-1.23	0.56	1.11	TRUE	TRUE	TRUE	TRUE
P01837	Igkc	5.61123	5.73084	5.23096	5.53646	5.6725	6.48397	6.53086	6.674	7.95379	7.82703	7.89882	7.93223	7.1813	7.34269	7.6156	7.45734	FALSE	0	1.82e-09	1.58e-07	2.38	0.01246	0.0482	-0.504	3.97e-08	6.54e-05	1.87	-0.452	-1.27	0.607	1.11	TRUE	TRUE	TRUE	TRUE
P01029	C4b	11.3682	11.3203	11.1946	11.1623	11.1685	11.3039	11.3056	11.3481	13.2084	13.2265	13.1249	13.2343	11.728	11.8256	11.8527	11.8462	FALSE	0	2.23e-15	8.11e-12	1.94	2.38e-13	8.65e-10	-1.39	5.38e-08	6.54e-05	0.552	-0.607	-0.627	-0.0755	1.31	TRUE	TRUE	TRUE	TRUE
O88492	Plin4	7.04829	6.99822	7.10982	6.8895	7.40971	7.28802	7.49442	7.30195	8.13201	7.81898	7.96279	7.91421	7.20743	7.62261	7.42301	7.54436	FALSE	0	3.5e-08	1.48e-06	0.946	4.71e-05	0.000648	-0.508	0.000198508	0.0122	0.438	-0.0743	-0.436	0.00152	0.509	TRUE	TRUE	TRUE	TRUE
O70370	Ctss	7.81618	7.4712	7.52598	7.45009	7.62817	7.78848	7.76436	7.91529	8.72841	8.72684	8.67276	8.78669	7.84654	8.02132	7.98345	8.15609	FALSE	0	1.24e-09	1.26e-07	1.16	4.87e-07	2.02e-05	-0.727	0.000128616	0.00984	0.436	-0.244	-0.452	-0.0158	0.711	TRUE	TRUE	TRUE	TRUE
O35955	Psmb10	7.37132	7.36996	7.3523	7.25946	7.24301	7.50777	7.56681	7.61148	8.59071	8.5129	8.65389	8.61583	7.69154	7.83388	7.7254	7.83671	FALSE	0	2.98e-11	1.03e-08	1.26	8.4e-09	9.76e-07	-0.821	1.76e-05	0.00316	0.434	-0.314	-0.458	-0.0246	0.797	TRUE	TRUE	TRUE	TRUE
O08692	Ngp	5.91562	5.88502	5.96005	5.30013	5.80355	5.70871	5.91877	6.17133	5.51286	5.24011	5.12399	5.3582	6.6211	6.30311	6.52658	6.48832	TRUE	6	0.00591589	0.0186	-0.456	7.9e-07	2.89e-05	1.18	0.000156637	0.0109	0.72	0.0358	-0.0996	0.62	-0.556	TRUE	TRUE	TRUE	TRUE
E9Q555	Rnf213	6.88875	6.73419	6.92048	7.04077	6.94895	7.0218	7.20608	7.01183	7.84583	7.87624	7.808	7.83077	7.11649	7.22643	7.17548	7.20962	FALSE	0	3.72e-10	5.29e-08	0.944	4.11e-08	3.21e-06	-0.658	0.000397136	0.0176	0.286	-0.194	-0.345	-0.0594	0.599	TRUE	TRUE	TRUE	TRUE
E9Q236	Abcc4	7.78756	7.58381	7.37688	7.52625	7.60427	7.52963	7.87905	7.68105	8.13691	8.34908	8.14788	8.35763	7.87825	7.95221	7.89054	7.90365	FALSE	0	1.86e-06	3.24e-05	0.679	0.00157806	0.00973	-0.342	0.00173414	0.0353	0.338	-0.176	-0.28	0.0571	0.399	TRUE	TRUE	TRUE	TRUE
A2AI08	Tprn	6.5794	6.95057	6.74087	6.68705	7.01324	7.01275	6.95326	6.96017	7.46625	7.50054	7.35734	7.53528	6.99043	7.04118	7.0495	7.09517	FALSE	0	1.62e-08	8.27e-07	0.725	1.1e-05	0.000217	-0.421	0.000279696	0.0151	0.305	-0.0735	-0.319	-0.0142	0.407	TRUE	TRUE	TRUE	TRUE
Q9Z2I2	Fkbp1b	7.12635	7.08827	7.20706	7.05653	6.97948	6.98641	6.94959	6.6649	6.82141	6.67294	6.77403	6.70625	6.67319	6.58512	6.69912	6.94582	FALSE	0	0.000359265	0.002	-0.376	0.828063	0.903	-0.0178	0.000236304	0.0134	-0.394	0.0241	0.249	-0.145	-0.127	TRUE	FALSE	TRUE	TRUE
Q9WV54	Asah1	11.1353	10.8714	10.8085	10.7908	10.9853	10.9829	11.122	11.1894	11.5093	11.4386	11.4256	11.4566	11.0926	11.3048	11.2662	11.1777	FALSE	0	2.59e-06	4.17e-05	0.556	0.00472153	0.023	-0.247	0.000902076	0.0271	0.309	-0.0899	-0.258	0.0505	0.298	TRUE	FALSE	TRUE	TRUE
Q9WTK3	Gpaa1	8.05694	8.29944	7.76143	7.7091	7.61076	7.67691	7.55565	8.05556	7.55133	7.60812	7.49647	7.40134	7.38556	7.44685	7.44912	7.537	FALSE	0	0.00293601	0.0106	-0.442	0.635888	0.771	-0.0597	0.0011257	0.0288	-0.502	0.0621	0.294	-0.208	-0.148	TRUE	FALSE	TRUE	TRUE
Q9R1Q6	Tmem176b	5.82379	5.50752	5.5815	4.90081	5.83412	5.94671	6.29209	6.29829	6.40407	6.5681	6.57542	6.25927	6.02675	6.21016	6.05905	6.26526	FALSE	0	2.6e-05	0.00025	0.998	0.0773122	0.186	-0.311	0.000869744	0.0264	0.687	0.0582	-0.581	0.106	0.417	TRUE	FALSE	TRUE	TRUE
Q9R0U0	Srsf10	10.0877	10.0715	9.95119	9.9332	9.73567	9.76299	9.77342	9.56464	9.59593	9.75234	9.53276	9.56651	9.76222	9.4331	9.68896	9.58744	FALSE	0	8.37e-05	0.000635	-0.399	0.935387	0.962	0.00605	9.72e-05	0.0084	-0.393	-0.0283	0.273	-0.12	-0.126	TRUE	FALSE	TRUE	TRUE
Q9R069	Bcam	8.91839	8.6899	8.72746	8.81003	8.73715	8.72167	8.94543	8.91349	9.40158	9.36456	9.26587	9.37443	8.93524	9.27003	9.25983	9.03983	FALSE	0	5.09e-06	6.99e-05	0.565	0.0132547	0.0505	-0.225	0.000765957	0.025	0.34	-0.194	-0.237	0.103	0.328	TRUE	FALSE	TRUE	TRUE
Q9R020	Zranb2	7.86716	8.16083	7.83588	7.54779	7.54839	7.40197	7.58252	7.50971	7.41909	7.52706	7.60321	7.53015	7.31666	7.36496	7.48717	7.23835	FALSE	0	0.00427815	0.0143	-0.333	0.108146	0.236	-0.168	0.000153286	0.0109	-0.501	-0.0482	0.294	-0.207	-0.0389	TRUE	FALSE	TRUE	TRUE
Q9R013	Ctsf	8.62002	8.50265	8.69735	8.64976	8.64918	8.77999	8.70686	8.57658	9.19206	9.15334	9.19966	9.14319	8.81157	8.99574	9.09365	8.96577	FALSE	0	2.19e-07	6.28e-06	0.555	0.00398068	0.0201	-0.205	4.14e-05	0.00468	0.349	-0.18	-0.241	0.108	0.313	TRUE	FALSE	TRUE	TRUE
Q9QXP6	Mkrn1	5.58669	5.66349	5.7785	6.07723	4.88095	5.40392	5.29418	4.64216	5.28327	5.24593	4.60251	5.48168	5.32924	4.64908	4.94222	4.9039	TRUE	1	0.00918693	0.0266	-0.623	0.355907	0.537	-0.197	0.0013734	0.0316	-0.82	-0.18	0.541	-0.279	-0.082	TRUE	FALSE	TRUE	TRUE
Q9JK53	Prelp	7.98051	7.82493	8.10273	7.82844	7.93705	8.10309	8.46528	8.47656	8.46506	8.34435	8.30202	8.43246	8.27809	8.50728	8.30572	8.20585	FALSE	0	0.00118606	0.00516	0.452	0.589182	0.737	-0.0617	0.00355059	0.0486	0.39	0.023	-0.288	0.102	0.164	TRUE	FALSE	TRUE	TRUE
Q9ESB3	Hrg	6.28233	6.09645	5.84452	6.39505	5.9199	6.45902	6.75843	6.76753	7.13611	7.10847	6.93665	6.65463	6.71742	6.98601	6.96402	6.87478	FALSE	0	0.000383126	0.00211	0.804	0.679224	0.803	-0.0734	0.000866489	0.0264	0.731	-0.143	-0.464	0.267	0.34	TRUE	FALSE	TRUE	TRUE
Q9D6K7	Ttc33	6.81051	6.85213	6.81144	6.95222	7.05893	6.70721	7.11101	6.9144	6.35528	6.28836	6.26321	6.70012	6.31302	6.56409	6.66026	6.34937	FALSE	0	0.000896947	0.00415	-0.455	0.530011	0.693	0.0699	0.00320561	0.0469	-0.385	0.278	0.187	-0.198	-0.268	TRUE	FALSE	TRUE	TRUE
Q9D1E8	Agpat5	9.08533	9.06654	8.76663	9.00479	8.6401	8.35664	8.49349	8.80356	8.57076	8.5541	8.86344	8.33182	8.34362	8.51136	8.46776	8.25386	FALSE	0	0.00361722	0.0125	-0.401	0.128411	0.267	-0.186	0.000157941	0.0109	-0.587	-0.0587	0.349	-0.238	-0.0521	TRUE	FALSE	TRUE	TRUE
Q9CZS1	Aldh1b1	9.93515	9.9204	9.88604	9.91656	9.83861	9.90775	9.85925	9.93668	9.48256	9.5483	9.54503	9.41113	9.68028	9.46246	9.63839	9.70538	FALSE	0	7.67e-07	1.62e-05	-0.418	0.0254126	0.0819	0.125	3.99e-05	0.00468	-0.293	0.156	0.185	-0.108	-0.233	TRUE	FALSE	TRUE	TRUE
Q9CQN6	Tmem14c	9.97209	10.0897	9.59166	9.73995	9.46357	9.60989	9.37605	9.75434	9.0798	9.08601	9.08927	9.39307	9.3447	9.48209	9.5892	9.22769	FALSE	0	4.4e-05	0.000377	-0.686	0.0536522	0.143	0.249	0.00234527	0.0409	-0.437	0.0579	0.355	-0.0821	-0.331	TRUE	FALSE	TRUE	TRUE
Q9CQE1	Nipsnap3b	8.97662	8.93625	8.85302	8.86499	8.82637	8.83799	8.72192	9.01585	8.42635	8.52691	8.22853	8.42283	8.3891	8.47757	8.43202	8.43725	FALSE	0	1.83e-06	3.2e-05	-0.507	0.622691	0.761	0.0328	3.95e-06	0.0011	-0.474	0.202	0.259	-0.214	-0.247	TRUE	FALSE	TRUE	TRUE
Q9CQ69	Uqcrq	11.1918	12.1192	10.2062	10.4041	10.2197	10.5054	10.5479	10.9247	9.77978	9.92924	9.52599	9.54147	9.67762	9.54586	9.95637	9.77832	FALSE	0	0.00100634	0.00454	-1.29	0.886149	0.934	0.0454	0.00134042	0.031	-1.24	0.309	0.739	-0.501	-0.547	TRUE	FALSE	TRUE	TRUE
Q923K4	Gtpbp3	7.6814	7.50925	7.31167	7.32055	7.26206	7.39798	7.53364	7.41274	7.05587	7.07907	7.20451	7.1012	7.1716	7.07196	7.13653	7.12402	FALSE	0	0.000438887	0.00235	-0.346	0.83729	0.907	0.0159	0.000657116	0.0228	-0.33	0.128	0.182	-0.147	-0.163	TRUE	FALSE	TRUE	TRUE
Q922H9	Znf330	7.91088	7.8661	7.65772	7.55155	7.55784	7.65424	7.63113	7.84422	7.48196	7.39967	7.22517	7.35361	7.4823	7.38241	7.35255	7.27262	FALSE	0	0.00049514	0.00257	-0.381	0.932068	0.96	0.00737	0.000585399	0.0211	-0.374	0.133	0.208	-0.167	-0.174	TRUE	FALSE	TRUE	TRUE
Q91X72	Hpx	9.94181	9.72254	9.60976	9.64716	9.58024	9.70556	10.1096	9.94475	10.4854	10.4984	10.4309	10.3229	10.3509	10.6087	10.4495	10.4688	FALSE	0	8.22e-06	0.000102	0.704	0.739863	0.845	0.0351	4.78e-06	0.00124	0.739	-0.282	-0.387	0.352	0.317	TRUE	FALSE	TRUE	TRUE
Q91V93	Rhobtb2	7.44665	7.49913	7.50637	7.41585	7.51609	7.52046	7.45299	7.18279	6.98043	7.0326	7.226	7.27746	7.17241	7.13253	6.83244	6.93098	FALSE	0	0.00246052	0.00915	-0.338	0.242905	0.416	-0.112	0.000230669	0.0134	-0.45	0.16	0.209	-0.241	-0.129	TRUE	FALSE	TRUE	TRUE
Q91V01	Lpcat3	6.84174	6.3748	6.56509	6.74264	6.55827	6.98306	6.80464	7.19684	7.35368	7.26316	7.41036	6.81503	7.1286	7.06439	7.19436	7.31766	FALSE	0	0.00150444	0.00622	0.579	0.819646	0.898	-0.0343	0.00238472	0.0412	0.545	-0.0902	-0.345	0.2	0.235	TRUE	FALSE	TRUE	TRUE
Q8VE97	Srsf4	7.09182	7.42911	7.12497	7.26419	7.52752	7.08514	7.21823	7.16345	6.89263	7.01775	6.77187	6.5823	6.77685	6.68155	6.8769	6.86691	FALSE	0	0.00181939	0.00723	-0.411	0.886749	0.934	-0.0156	0.00136578	0.0315	-0.427	0.225	0.204	-0.223	-0.207	TRUE	FALSE	TRUE	TRUE
Q8VDY9	Caap1	6.27884	6.07942	6.03975	6.76094	5.66099	6.19531	5.84986	5.76493	5.23328	5.22026	5.33644	5.32591	5.68225	5.70568	4.86875	5.39407	FALSE	0	8.22e-05	0.000626	-1.01	0.482319	0.654	0.134	0.00031283	0.0159	-0.877	0.155	0.577	-0.3	-0.433	TRUE	FALSE	TRUE	TRUE
Q8VD72	Ttc8	7.97022	7.9243	7.88501	8.00234	8.24253	8.07209	8.32734	8.37993	8.29423	8.38744	8.118	8.12728	8.19013	8.15975	8.36864	8.34818	FALSE	0	0.00206396	0.00798	0.286	0.652981	0.786	0.0349	0.00083491	0.0262	0.321	0.0806	-0.229	0.0918	0.0569	TRUE	FALSE	TRUE	TRUE
Q8VCM7	Fgg	8.53233	8.44933	8.25617	8.51332	8.28353	8.27129	8.65537	8.40136	9.26751	9.31641	9.18849	8.95448	8.92754	9.30813	9.0283	9.22766	FALSE	0	6.85e-06	8.81e-05	0.744	0.593294	0.74	-0.0588	1.68e-05	0.00316	0.685	-0.383	-0.349	0.337	0.395	TRUE	FALSE	TRUE	TRUE
Q8R4E6	Purg	7.81998	8.00811	7.77293	8.27478	7.67972	7.94999	7.67575	7.79835	7.41762	7.34219	7.1731	7.26966	7.52402	7.39231	7.60837	7.61981	FALSE	0	1.06e-05	0.000123	-0.668	0.0344705	0.103	0.235	0.000717824	0.0241	-0.433	0.131	0.324	-0.109	-0.345	TRUE	FALSE	TRUE	TRUE
Q8QZV7	IntS13	6.38491	6.33387	5.90921	6.33552	6.22972	6.37066	6.1721	6.21776	5.63948	6.04183	5.68879	5.5503	5.21678	5.56161	6.20408	5.54895	FALSE	0	0.0100655	0.0286	-0.511	0.580714	0.731	-0.0972	0.00325783	0.0469	-0.608	0.285	0.278	-0.33	-0.233	TRUE	FALSE	TRUE	TRUE
Q8K480	Mfrp	9.17047	9.20068	8.97558	9.0848	9.17952	9.1902	9.5742	9.43796	9.84156	9.82166	9.62768	9.82151	9.64945	9.70644	9.64081	9.58206	TRUE	2	1.2e-06	2.29e-05	0.67	0.131304	0.271	-0.133	1.47e-05	0.00305	0.537	-0.124	-0.361	0.176	0.309	TRUE	FALSE	TRUE	TRUE
Q8K2M0	Mrpl38	8.5739	8.58844	8.67852	8.75946	8.2358	8.75834	8.50179	8.01243	8.13391	8.57635	7.91145	8.22693	7.911	7.81068	8.22011	8.3121	FALSE	0	0.0177937	0.0451	-0.438	0.37792	0.559	-0.149	0.00290941	0.0454	-0.587	0.0514	0.324	-0.262	-0.114	TRUE	FALSE	TRUE	TRUE
Q8K298	Anln	8.4511	8.58496	8.53789	8.661	8.5214	8.51609	8.35464	8.49096	9.06629	9.036	9.1824	9.07556	8.70803	8.86006	8.91075	8.90697	FALSE	0	2.66e-07	7.29e-06	0.531	0.000900307	0.00629	-0.244	0.000210813	0.0128	0.288	-0.271	-0.183	0.105	0.349	TRUE	FALSE	TRUE	TRUE
Q8K215	Lyrm4	8.41362	8.2095	7.99763	8.00189	7.98472	8.01118	7.88987	7.58474	7.52034	7.77368	7.51767	7.712	7.62042	7.50744	7.93141	7.62738	FALSE	0	0.000572168	0.00286	-0.525	0.736664	0.844	0.0407	0.00111665	0.0288	-0.484	0.0362	0.324	-0.16	-0.201	TRUE	FALSE	TRUE	TRUE
Q8CGK6	Ifnl3	7.41056	8.77212	7.64355	8.62536	9.74495	8.74184	8.25379	8.92816	9.64355	9.30957	9.91953	9.4369	9.54993	9.42963	9.81808	9.46115	TRUE	6	0.000418016	0.00226	1.46	0.968891	0.983	-0.0127	0.000451081	0.0183	1.45	-0.126	-0.93	0.522	0.534	TRUE	FALSE	TRUE	TRUE
Q8CFR0	C1ql2	7.75097	8.05035	7.65725	7.94101	7.83032	7.95247	7.92471	7.81788	7.44048	7.17061	7.23901	7.53194	7.40714	7.55928	7.58316	7.47234	FALSE	0	6.31e-05	0.000508	-0.504	0.0971506	0.219	0.16	0.001828	0.0368	-0.344	0.236	0.204	-0.14	-0.3	TRUE	FALSE	TRUE	TRUE
Q8CFE2	Hpf1	7.33101	7.10211	6.96753	7.06457	6.99548	6.85589	7.16904	7.16283	6.78421	6.91966	6.69947	6.71547	6.90101	6.76956	6.71633	6.82134	FALSE	0	0.00134413	0.00571	-0.337	0.795256	0.884	0.0224	0.00226941	0.0402	-0.314	0.11	0.18	-0.134	-0.156	TRUE	FALSE	TRUE	TRUE
Q8C7U1	N4bp3	6.26118	6.25121	6.34565	6.34779	6.32873	6.17494	6.19298	5.90685	6.0089	6.12385	5.87155	5.81629	5.66406	5.98659	5.9268	6.06117	FALSE	0	0.00294417	0.0106	-0.346	0.644812	0.778	-0.0455	0.00115766	0.0292	-0.392	0.0716	0.222	-0.17	-0.124	TRUE	FALSE	TRUE	TRUE
Q8C0D0	Trub1	6.27962	6.25948	5.92551	6.23959	6.01635	6.25034	6.22632	6.30856	5.62096	5.79144	5.9154	5.75705	5.45284	5.92888	5.98192	5.73755	FALSE	0	0.00304374	0.0109	-0.405	0.971768	0.985	0.00409	0.00327048	0.0469	-0.401	0.22	0.195	-0.205	-0.21	TRUE	FALSE	TRUE	TRUE
Q8BZX4	Srek1	7.06581	7.08362	7.31279	7.01679	7.2407	7.14869	6.91429	7.13746	6.66219	6.71203	6.60816	6.23054	6.21402	6.66073	6.52106	6.64182	FALSE	0	0.000284772	0.00168	-0.567	0.716881	0.831	-0.0438	0.000142604	0.0107	-0.61	0.287	0.297	-0.314	-0.27	TRUE	FALSE	TRUE	TRUE
Q8BU04	Ubr7	6.58735	6.37779	6.73581	6.90613	6.47214	6.55941	6.57891	6.30349	5.39214	6.15449	5.58452	5.5753	6.19954	5.79711	6.15346	6.15634	FALSE	0	1.47e-05	0.000158	-0.975	0.0191221	0.0663	0.4	0.00191249	0.0373	-0.575	0.258	0.431	-0.144	-0.544	TRUE	FALSE	TRUE	TRUE
Q8BTV1	Tusc3	8.17172	7.88215	7.51942	7.59222	7.23631	7.33527	7.61096	7.19318	7.01711	6.50107	6.63719	6.83324	6.77223	7.08543	7.1549	7.14912	FALSE	0	6.49e-06	8.41e-05	-1.04	0.0712258	0.175	0.293	0.000191119	0.0121	-0.751	0.113	0.561	-0.19	-0.484	TRUE	FALSE	TRUE	TRUE
Q8BLY2	Tars3	8.48259	8.56561	8.48388	8.49031	8.38982	8.41993	8.35453	8.33627	8.14024	8.15365	8.10234	8.16085	8.16892	8.03409	8.12559	8.17074	FALSE	0	8.77e-08	3.18e-06	-0.366	0.699872	0.819	-0.0144	5.4e-08	6.54e-05	-0.381	0.0889	0.219	-0.161	-0.147	TRUE	FALSE	TRUE	TRUE
Q8BHS8	Sybu	11.68	11.6121	11.4332	11.6634	11.4734	11.5857	11.6096	11.4552	11.3378	11.3481	11.1343	11.216	11.287	11.2381	11.3651	11.4305	FALSE	0	0.000158727	0.00107	-0.338	0.301752	0.479	0.0711	0.00123712	0.0299	-0.267	0.102	0.168	-0.0992	-0.17	TRUE	FALSE	TRUE	TRUE
Q8BHK2	Scn3b	7.9387	7.65001	6.42983	7.50577	6.41974	7.07476	7.11389	6.75145	5.83098	5.58169	6.12643	5.83803	6.07045	6.28174	6.37246	6.56534	FALSE	0	3.64e-05	0.000324	-1.54	0.0868474	0.202	0.478	0.00112006	0.0288	-1.06	0.243	0.784	-0.274	-0.753	TRUE	FALSE	TRUE	TRUE
Q8BHE8	Maip1	8.6904	9.14699	8.4438	8.94568	8.22488	8.45893	8.3166	8.75087	8.39296	8.20609	8.24693	8.11264	8.11824	7.96792	8.50115	8.13871	FALSE	0	0.00214478	0.00824	-0.567	0.70669	0.824	-0.0582	0.00100477	0.0282	-0.625	0.0214	0.39	-0.235	-0.177	TRUE	FALSE	TRUE	TRUE
Q8BH43	Wasf2	9.00339	9.05931	9.05594	8.87366	9.07953	8.88473	9.28276	9.12065	9.46536	9.73184	9.45475	9.3561	9.38599	9.1763	9.28836	9.37787	FALSE	0	5.69e-05	0.000469	0.504	0.0458985	0.127	-0.195	0.00370015	0.0496	0.309	-0.133	-0.227	0.0823	0.277	TRUE	FALSE	TRUE	TRUE
Q8BH27	Megf9	7.14536	7.05816	7.32381	7.18091	7.26076	7.18724	7.19146	7.20841	6.71484	6.90332	6.72773	6.93305	6.76743	6.7363	6.86677	6.79486	FALSE	0	3.69e-05	0.000327	-0.357	0.646016	0.779	-0.0284	1.65e-05	0.00316	-0.386	0.212	0.177	-0.209	-0.18	TRUE	FALSE	TRUE	TRUE
Q8BGS1	Epb41l5	7.56018	7.47031	7.30267	7.37026	7.45017	7.43825	7.45462	7.45206	7.87445	7.89032	7.85048	7.9001	7.48592	7.81457	7.63388	7.82242	FALSE	0	1.1e-05	0.000127	0.453	0.0149305	0.0552	-0.19	0.00175106	0.0355	0.263	-0.162	-0.185	0.0785	0.268	TRUE	FALSE	TRUE	TRUE
Q8BGC1		5.3573	5.45811	6.0138	6.05344	6.03886	5.98761	5.44252	5.41692	5.30628	5.25106	5.02862	5.25714	5.01678	4.76693	5.03223	4.65385	FALSE	0	0.0128066	0.0347	-0.51	0.0755953	0.184	-0.343	0.000294044	0.0153	-0.853	0.341	0.341	-0.513	-0.169	TRUE	FALSE	TRUE	TRUE
Q810U5	Ccdc50	6.72655	6.33762	6.41109	6.41943	6.32612	6.53491	6.71085	6.75887	6.77609	6.89461	6.74458	6.8525	6.88132	6.80022	6.70537	6.9853	FALSE	0	0.0036963	0.0127	0.343	0.795564	0.884	0.0261	0.00218415	0.0392	0.369	-0.0964	-0.205	0.164	0.138	TRUE	FALSE	TRUE	TRUE
Q80ZM8	Crls1	6.26478	6.49439	6.62798	6.7474	6.7479	6.66247	6.6576	6.60041	6.47125	6.02801	6.002	6.30545	6.14682	6.09352	6.06273	5.98564	FALSE	0	0.00756089	0.0227	-0.332	0.244484	0.418	-0.13	0.000681577	0.0235	-0.461	0.298	0.165	-0.296	-0.167	TRUE	FALSE	TRUE	TRUE
Q80YX1	Tnc	8.76548	8.95692	8.99667	9.03237	9.08402	8.84839	8.98354	8.95318	8.43486	8.43931	8.48268	8.31607	8.56681	8.37201	8.51399	8.59628	FALSE	0	2.17e-06	3.63e-05	-0.52	0.187794	0.349	0.094	1.99e-05	0.00345	-0.426	0.258	0.229	-0.197	-0.291	TRUE	FALSE	TRUE	TRUE
Q80YA7	Dpp8	7.25402	7.34122	6.98738	7.11207	7.14962	7.10721	7.19466	7.20953	6.86626	6.94049	6.85765	6.76707	6.88116	6.8166	6.94234	6.82034	FALSE	0	0.00025168	0.00153	-0.316	0.913065	0.95	0.00724	0.000310545	0.0159	-0.309	0.15	0.158	-0.15	-0.158	TRUE	FALSE	TRUE	TRUE
Q80X71	Tmem106b	8.38671	8.52348	8.6275	8.79872	8.43074	8.59332	8.55555	8.39513	9.12313	8.84771	8.75356	8.88673	8.82337	9.01982	9.28982	9.11341	FALSE	0	0.0095833	0.0274	0.319	0.157642	0.307	0.159	0.000501407	0.0188	0.478	-0.267	-0.176	0.301	0.142	TRUE	FALSE	TRUE	TRUE
Q80WT0	Jph4	7.93627	8.00139	7.74062	8.11674	7.78877	7.89029	7.8039	7.79053	7.44059	7.47523	7.64625	7.65109	7.76509	7.67971	7.6401	7.64605	TRUE	1	6.85e-05	0.000542	-0.395	0.0902366	0.208	0.129	0.0021769	0.0392	-0.266	0.0676	0.198	-0.0681	-0.197	TRUE	FALSE	TRUE	TRUE
Q80WB5	Ntaq1	5.00513	6.21046	5.09066	5.84824	4.86954	5.44934	5.04592	5.54687	4.31662	4.14816	2.97438	4.50372	4.38793	4.37939	4.73343	4.06997	FALSE	0	0.000297012	0.00173	-1.55	0.232489	0.404	0.407	0.00340342	0.0479	-1.15	0.442	0.752	-0.394	-0.801	TRUE	FALSE	TRUE	TRUE
Q7TPQ3	Shprh	7.89237	7.64456	7.63097	7.59231	7.06167	7.54695	7.75153	7.56193	7.19185	6.95837	7.2221	7.23096	7.4018	7.17832	6.82847	6.73331	FALSE	0	0.00347254	0.0121	-0.539	0.465995	0.638	-0.115	0.00078949	0.0252	-0.655	0.141	0.351	-0.304	-0.188	TRUE	FALSE	TRUE	TRUE
Q6IME9	Krt72	7.5532	7.00403	7.33062	7.07738	6.64407	6.21708	6.49648	6.79842	6.72861	6.49577	6.18492	6.4331	6.14897	6.5369	6.03259	6.30651	TRUE	4	0.000177569	0.00117	-0.781	0.208546	0.377	-0.204	1.72e-05	0.00316	-0.985	-0.0853	0.617	-0.368	-0.164	TRUE	FALSE	TRUE	TRUE
Q62219	Tgfb1i1	8.17797	7.97586	7.9838	8.05912	8.14556	8.28266	8.35217	8.22567	8.4694	8.47544	8.48122	8.44455	8.18774	8.52851	8.35025	8.32259	FALSE	0	1.8e-05	0.000186	0.418	0.0901529	0.208	-0.12	0.000484168	0.0188	0.298	-0.0274	-0.23	0.0684	0.189	TRUE	FALSE	TRUE	TRUE
Q62148	Aldh1a2	7.64507	7.21675	7.39864	7.26502	7.3877	7.80938	8.03592	7.86184	8.00914	8.06396	7.7715	7.90451	7.72048	7.91495	7.98837	7.95194	FALSE	0	0.000556804	0.00281	0.556	0.734755	0.843	-0.0433	0.00109173	0.0288	0.513	0.0271	-0.365	0.147	0.191	TRUE	FALSE	TRUE	TRUE
Q62132	Ptprr	6.13645	6.36578	6.30298	6.06461	6.21642	6.37388	6.15338	6.39714	5.61466	5.68823	5.68342	5.71692	6.00398	5.85901	5.69083	5.98038	FALSE	0	9.38e-06	0.000112	-0.542	0.0218426	0.0734	0.208	0.000980817	0.0281	-0.334	0.27	0.202	-0.132	-0.34	TRUE	FALSE	TRUE	TRUE
Q61941	Nnt	8.9352	8.86675	8.85018	8.97046	8.61995	9.03137	9.04773	8.72468	6.61245	6.90313	6.40078	7.64448	8.10909	6.71088	7.96979	7.84034	FALSE	0	5.13e-06	7.03e-05	-2.02	0.0171356	0.0609	0.767	0.000601072	0.0212	-1.25	0.779	0.828	-0.42	-1.19	TRUE	FALSE	TRUE	TRUE
Q61838	Pzp	11.1593	10.8249	10.754	10.69	10.7232	10.9347	11.2613	11.1843	11.6633	11.63	11.5307	11.5749	11.2551	11.5265	11.4378	11.4599	FALSE	0	1.5e-05	0.000162	0.743	0.141403	0.285	-0.18	0.000240047	0.0135	0.563	-0.2	-0.369	0.194	0.374	TRUE	FALSE	TRUE	TRUE
Q61830	Mrc1	7.02661	6.73626	6.91475	6.98991	6.69153	7.16626	6.65804	6.57464	6.47295	6.57875	6.1786	6.65329	6.64315	6.38135	6.53159	6.24854	FALSE	0	0.00462849	0.0152	-0.446	0.883911	0.933	-0.0197	0.00343949	0.048	-0.466	0.12	0.264	-0.202	-0.182	TRUE	FALSE	TRUE	TRUE
Q61792	Lasp1	9.37911	9.4091	8.82453	9.10421	8.586	8.95026	8.55883	8.86871	8.45023	8.24783	8.42273	8.232	8.46517	8.44574	8.80471	8.56943	FALSE	0	1.4e-05	0.000153	-0.841	0.0942393	0.214	0.233	0.000346083	0.0166	-0.608	0.0335	0.472	-0.136	-0.369	TRUE	FALSE	TRUE	TRUE
Q61704	Itih3	7.91128	8.12477	7.96708	8.00281	8.04957	7.71911	7.9582	8.16422	8.6952	8.71088	8.6022	8.4026	8.33748	8.58548	8.52537	8.40839	FALSE	0	1.42e-05	0.000154	0.601	0.158186	0.308	-0.139	0.000197743	0.0122	0.463	-0.288	-0.259	0.204	0.342	TRUE	FALSE	TRUE	TRUE
Q61147	Cp	9.11526	8.85454	8.85115	8.76548	8.74863	9.00759	9.21669	9.07782	9.59006	9.53164	9.5633	9.55701	9.31124	9.56318	9.35957	9.47776	FALSE	0	4.3e-06	6.26e-05	0.664	0.172062	0.327	-0.133	4.71e-05	0.00495	0.531	-0.212	-0.328	0.204	0.336	TRUE	FALSE	TRUE	TRUE
Q61143	Trpc6	6.4121	6.23035	6.12434	6.4749	6.55487	6.42204	6.61728	6.38242	5.60366	5.49398	6.01461	5.50409	5.8251	5.81715	5.57628	6.13817	FALSE	0	0.000159593	0.00108	-0.656	0.172807	0.329	0.185	0.00255923	0.0426	-0.471	0.42	0.236	-0.235	-0.42	TRUE	FALSE	TRUE	TRUE
Q60870	Reep5	11.8291	11.8328	10.2816	10.8896	9.79678	10.3536	10.2604	10.4403	10.3622	10.1877	10.1213	9.98162	10.1254	10.2316	10.331	10.248	FALSE	0	0.0017774	0.0071	-1.05	0.798517	0.885	0.0708	0.00298126	0.0456	-0.974	-0.242	0.754	-0.221	-0.291	TRUE	FALSE	TRUE	TRUE
Q5SYH2	Tmem199	5.75562	6.09441	5.96014	6.35134	6.23397	6.11135	6.25467	6.29436	6.1211	6.60979	6.52988	6.33517	6.77995	6.61196	6.59645	6.56489	FALSE	0	0.00861885	0.0252	0.359	0.0612031	0.157	0.239	0.000162756	0.0111	0.598	-0.102	-0.285	0.313	0.0737	TRUE	FALSE	TRUE	TRUE
Q5DTY9	Kctd16	10.4045	10.4733	10.3846	10.3765	10.2975	10.3207	10.3044	10.2518	9.96247	9.96834	9.89206	9.95803	10.1158	9.98036	10.1449	10.1606	FALSE	0	1.71e-08	8.62e-07	-0.464	0.00193283	0.0114	0.155	2.46e-06	0.000942	-0.309	0.106	0.222	-0.0868	-0.242	TRUE	FALSE	TRUE	TRUE
Q56A08	Gpkow	6.87324	6.69516	6.57761	6.8929	6.6762	6.92758	7.12081	7.02822	6.35176	6.30223	6.52521	6.51549	6.2947	6.42292	6.53954	6.37456	FALSE	0	0.00361121	0.0125	-0.336	0.87268	0.928	-0.0157	0.00260813	0.0428	-0.352	0.306	0.127	-0.224	-0.209	TRUE	FALSE	TRUE	TRUE
Q3UVR3	Ttbk2	7.60691	7.65231	7.81544	7.54153	7.80235	7.45903	7.37456	7.5098	7.42992	7.18804	7.36119	7.25877	7.37575	7.35967	7.36058	7.25228	FALSE	0	0.00114947	0.00504	-0.345	0.749851	0.852	0.0276	0.0021863	0.0392	-0.317	0.0772	0.195	-0.122	-0.15	TRUE	FALSE	TRUE	TRUE
Q3URS9	Ccdc51	7.72046	7.56118	7.56025	7.34767	7.53255	7.3519	7.57591	7.73192	7.21803	7.26846	7.18983	7.19065	7.12858	7.24207	7.32531	7.34528	FALSE	0	0.00125067	0.0054	-0.331	0.604803	0.749	0.0436	0.00357677	0.0488	-0.287	0.155	0.154	-0.133	-0.176	TRUE	FALSE	TRUE	TRUE
Q3UQ84	Tars2	7.88423	8.03463	8.00243	7.91865	7.97107	7.72538	7.69703	7.85113	7.64644	7.72576	7.6256	7.69557	7.78683	7.6269	7.69349	7.66075	FALSE	0	0.000237582	0.00146	-0.287	0.755597	0.856	0.0186	0.000434137	0.0181	-0.268	0.027	0.176	-0.0921	-0.111	TRUE	FALSE	TRUE	TRUE
Q3UH60	Dip2b	9.97544	9.99841	10.0171	10.0495	9.89541	9.96413	9.91487	9.92168	9.47842	9.57292	9.52341	9.53649	9.73619	9.501	9.593	9.61531	FALSE	0	2.17e-08	1.02e-06	-0.482	0.0736495	0.18	0.0836	2.35e-07	0.00019	-0.399	0.156	0.242	-0.157	-0.241	TRUE	FALSE	TRUE	TRUE
Q3TUF7	Yeats2	5.84465	6.22411	6.53479	6.07789	6.2461	6.19189	5.74587	6.3516	5.64519	5.50407	5.6671	5.66365	5.69312	5.61554	5.82871	5.51306	FALSE	0	0.00144548	0.00604	-0.55	0.76459	0.862	0.0426	0.00264884	0.0428	-0.508	0.237	0.274	-0.234	-0.277	TRUE	FALSE	TRUE	TRUE
Q3TEL6	Rnf157	6.24235	6.48133	6.19248	6.35313	6.28421	6.17165	6.18672	6.4299	5.85849	5.91109	6.02349	5.92538	5.86432	5.68663	5.98828	5.97512	FALSE	0	0.000241549	0.00148	-0.388	0.531835	0.694	-0.051	7.43e-05	0.0071	-0.439	0.17	0.219	-0.22	-0.169	TRUE	FALSE	TRUE	TRUE
Q08091	Cnn1	6.45365	6.54705	6.48123	6.21522	6.74898	6.44575	7.00573	6.99423	7.18859	7.363	7.00194	7.21527	6.8416	7.17763	6.79296	7.20701	FALSE	0	4.38e-05	0.000376	0.768	0.178029	0.335	-0.187	0.000602934	0.0212	0.581	-0.0563	-0.431	0.15	0.337	TRUE	FALSE	TRUE	TRUE
P97930	Dtymk	7.43874	7.85894	7.28751	7.36228	6.83042	7.34136	7.11082	7.45586	7.18586	7.10895	7.11593	7.00402	7.0228	7.03928	7.01944	6.98144	FALSE	0	0.00931595	0.0268	-0.383	0.501053	0.67	-0.088	0.00234932	0.0409	-0.471	-0.0131	0.289	-0.182	-0.094	TRUE	FALSE	TRUE	TRUE
P97450	Atp5pf	11.7546	12.1561	11.346	11.7577	11.3779	11.4996	11.4723	11.5935	11.1933	11.2149	11.1865	11.1422	11.0643	11.1823	11.2637	11.366	FALSE	0	0.00034562	0.00195	-0.569	0.778572	0.872	0.0349	0.000599248	0.0212	-0.535	0.0751	0.343	-0.192	-0.226	TRUE	FALSE	TRUE	TRUE
P84099	Rpl19	9.6113	9.32786	8.98741	9.01489	8.94077	9.57231	9.35288	9.84363	8.6497	8.80722	8.10563	8.36367	8.44603	8.48777	8.631	8.52423	FALSE	0	0.00137759	0.00582	-0.754	0.833407	0.906	0.0407	0.00210552	0.0388	-0.713	0.511	0.319	-0.394	-0.435	TRUE	FALSE	TRUE	TRUE
P70205	Adcyap1r1	6.93388	7.19685	6.8135	7.05107	7.01192	6.9234	7.24573	6.93005	6.63496	6.89057	6.63146	6.76247	6.57015	6.45453	6.73059	6.82429	FALSE	0	0.0187919	0.0471	-0.269	0.415828	0.596	-0.085	0.00355085	0.0486	-0.354	0.177	0.148	-0.205	-0.12	TRUE	FALSE	TRUE	TRUE
P63137	Gabrb2	11.1052	11.463	10.968	11.1442	10.9829	11.1491	11.1026	11.2992	10.3419	10.5269	10.7095	10.5968	10.801	10.7552	10.7636	10.8992	FALSE	0	1.97e-05	0.0002	-0.626	0.0203627	0.0697	0.261	0.00255267	0.0426	-0.365	0.22	0.257	-0.108	-0.369	TRUE	FALSE	TRUE	TRUE
P62911	Rpl32	8.78798	8.84311	8.63616	8.69928	8.53185	8.82984	8.66904	8.65306	8.56356	8.43257	8.44083	8.40976	8.54047	8.31339	8.58991	8.44022	FALSE	0	0.00151481	0.00625	-0.28	0.898009	0.941	0.00932	0.00196157	0.0379	-0.271	0.0846	0.155	-0.115	-0.125	TRUE	FALSE	TRUE	TRUE
P62908	Rps3	11.8688	11.8939	11.6096	11.6327	11.508	11.7338	11.6287	11.7367	11.4761	11.3614	11.3868	11.417	11.4021	11.3817	11.5178	11.5426	FALSE	0	0.00029855	0.00174	-0.341	0.490521	0.661	0.0507	0.00117326	0.0293	-0.29	0.0832	0.183	-0.108	-0.158	TRUE	FALSE	TRUE	TRUE
P62320	Snrpd3	11.1742	10.9942	11.0908	11.1671	10.9848	11.1403	10.9451	11.2499	10.5239	10.6427	10.6844	10.6928	10.6799	10.9565	10.7902	10.859	FALSE	0	1.68e-05	0.000176	-0.471	0.0249025	0.0808	0.185	0.00171575	0.0351	-0.285	0.169	0.196	-0.0896	-0.275	TRUE	FALSE	TRUE	TRUE
P62071	Rras2	9.13008	9.22305	9.31367	9.33861	9.27882	9.19875	9.11056	8.99583	8.48803	8.51299	8.66879	8.55479	8.81208	8.58768	8.64229	8.82636	FALSE	0	1.45e-07	4.63e-06	-0.695	0.0432307	0.121	0.161	3.32e-06	0.00104	-0.534	0.228	0.334	-0.201	-0.361	TRUE	FALSE	TRUE	TRUE
P60764	Rac3	10.1874	10.4384	10.0635	9.98988	9.94894	9.91426	9.60069	10.1733	9.01252	9.66958	9.34856	9.3116	9.65818	9.19052	9.71796	9.33151	FALSE	0	0.000114989	0.000822	-0.834	0.394688	0.576	0.139	0.000601787	0.0212	-0.695	0.187	0.447	-0.248	-0.387	TRUE	FALSE	TRUE	TRUE
P60603	Romo1	7.85322	6.39063	6.89103	6.37916	6.30599	6.71786	6.52683	6.51627	5.83871	6.0373	5.47935	6.46152	5.8377	5.93387	6.12913	5.09149	FALSE	0	0.00923037	0.0266	-0.924	0.512374	0.679	-0.206	0.00241473	0.0414	-1.13	0.242	0.604	-0.526	-0.32	TRUE	FALSE	TRUE	TRUE
P59326	Ythdf1	6.32664	6.55735	6.11194	6.41984	6.25027	6.24116	6.3138	6.28902	6.02266	5.80099	5.87866	5.83241	5.86252	6.07718	6.07467	5.93106	FALSE	0	4.52e-05	0.000384	-0.47	0.226656	0.398	0.103	0.00046513	0.0187	-0.368	0.149	0.23	-0.138	-0.241	TRUE	FALSE	TRUE	TRUE
P58462	Foxp1	8.16726	7.95148	8.17112	8.07466	7.90995	7.93713	7.56574	7.86943	7.35463	7.31578	7.26867	7.52578	7.59347	7.42586	7.68892	7.31146	FALSE	0	2.42e-06	3.94e-05	-0.725	0.168909	0.323	0.139	2.51e-05	0.00406	-0.586	0.125	0.395	-0.191	-0.329	TRUE	FALSE	TRUE	TRUE
P54254	Atxn1	7.28844	7.15015	7.03779	7.27222	7.29687	7.30896	7.02798	6.79226	6.57574	6.88418	6.65105	6.95005	6.71335	6.77706	6.51864	6.8095	FALSE	0	0.0028107	0.0102	-0.422	0.612114	0.754	-0.0606	0.00100746	0.0282	-0.483	0.166	0.246	-0.236	-0.176	TRUE	FALSE	TRUE	TRUE
P52840	Sult1a1	6.79225	6.6525	6.84314	6.88129	6.83617	7.2262	7.35162	7.02071	7.31035	7.21723	7.40123	7.34199	7.21072	7.34902	6.96898	7.34622	FALSE	0	0.000192014	0.00125	0.525	0.362853	0.544	-0.099	0.00116811	0.0293	0.426	-0.000674	-0.317	0.109	0.208	TRUE	FALSE	TRUE	TRUE
P50172	Hsd11b1	8.62025	8.7548	8.68273	8.51517	8.70746	8.48421	8.60559	8.70302	8.21418	8.32291	8.27841	8.16219	8.31993	8.1929	8.16419	8.26653	FALSE	0	1.51e-05	0.000162	-0.399	0.89246	0.938	-0.00854	1.2e-05	0.00264	-0.407	0.188	0.206	-0.201	-0.193	TRUE	FALSE	TRUE	TRUE
P48962	Slc25a4	15.6757	15.766	15.4569	15.5212	15.4438	15.5118	15.335	15.708	15.2859	15.3247	15.319	15.2225	15.1996	15.246	15.437	15.3015	FALSE	0	0.00157917	0.00647	-0.317	0.922746	0.955	0.00802	0.00192024	0.0373	-0.309	0.0775	0.183	-0.126	-0.134	TRUE	FALSE	TRUE	TRUE
P47963	Rpl13	11.2601	11.3365	10.6445	10.9557	10.6964	11.011	10.5708	10.8785	10.385	10.3479	10.1788	10.2525	10.0937	10.409	10.5705	10.647	FALSE	0	0.000168927	0.00113	-0.758	0.368999	0.549	0.139	0.000996091	0.0282	-0.619	0.149	0.409	-0.21	-0.349	TRUE	FALSE	TRUE	TRUE
P43276	H1-5	10.9812	10.8213	10.6805	10.8686	10.3436	10.6871	10.5773	10.8877	10.3277	10.5629	9.98176	10.214	10.2616	9.96088	10.4948	10.3876	FALSE	0	0.0011579	0.00506	-0.566	0.974063	0.985	0.00462	0.00123581	0.0299	-0.562	0.122	0.335	-0.226	-0.231	TRUE	FALSE	TRUE	TRUE
P37804	Tagln	10.2716	9.8658	9.98012	9.79723	10.5111	10.3203	10.7304	10.6635	10.5192	10.6918	10.2625	10.6325	10.3556	10.5636	10.5647	10.5611	FALSE	0	0.00034268	0.00194	0.548	0.898134	0.941	-0.0152	0.000439612	0.0183	0.533	0.163	-0.415	0.118	0.133	TRUE	FALSE	TRUE	TRUE
P35569	Irs1	8.012	7.88332	7.69597	7.85501	7.67125	7.7051	7.84003	7.70051	7.49007	7.6426	7.46285	7.69236	7.63637	7.63697	7.45867	7.61717	FALSE	0	0.00111708	0.00492	-0.29	0.832364	0.905	0.0153	0.00170936	0.0351	-0.274	0.0417	0.174	-0.1	-0.116	TRUE	FALSE	TRUE	TRUE
P35441	Thbs1	6.21916	6.12222	6.01146	5.92488	7.79664	7.94243	6.81579	7.49185	6.66157	7.30175	6.77778	6.235	7.17826	6.63623	7.44246	7.05368	FALSE	0	0.016339	0.0422	0.675	0.199049	0.364	0.334	0.00112301	0.0288	1.01	0.661	-0.781	0.227	-0.107	TRUE	FALSE	TRUE	TRUE
P32883	Kras	9.2172	8.97187	8.08782	8.09223	8.13203	7.99435	8.36305	8.56089	7.5888	7.66269	7.4844	7.5241	7.39448	7.56761	8.00497	7.91985	FALSE	0	0.000544915	0.00276	-1.03	0.508807	0.676	0.157	0.00205883	0.0385	-0.871	0.227	0.557	-0.314	-0.47	TRUE	FALSE	TRUE	TRUE
P28653	Bgn	8.57773	8.22032	8.28848	7.97532	8.57081	8.62227	9.01037	8.956	8.86468	8.9296	8.69931	8.91954	8.68752	8.94765	8.94063	8.80057	FALSE	0	0.000299869	0.00174	0.588	0.941777	0.966	-0.00919	0.00034536	0.0166	0.579	0.102	-0.423	0.156	0.165	TRUE	FALSE	TRUE	TRUE
P28184	Mt3	9.13984	9.9851	9.5634	9.65015	9.42231	9.81382	9.36468	10.1835	10.0175	10.3813	9.94398	10.346	10.1701	10.2527	10.3041	10.2192	FALSE	0	0.0068052	0.0208	0.588	0.734034	0.842	0.0643	0.0034061	0.0479	0.652	-0.226	-0.338	0.314	0.25	TRUE	FALSE	TRUE	TRUE
P27005	S100a8	6.66434	7.55327	7.43405	6.66087	7.60679	7.4562	7.80962	7.47221	8.03981	7.71643	8.03464	7.8404	8.21443	8.26962	8.15245	8.39711	FALSE	0	0.000366932	0.00203	0.83	0.0694556	0.172	0.351	1.11e-05	0.0026	1.18	-0.121	-0.63	0.551	0.2	TRUE	FALSE	TRUE	TRUE
P24668	M6pr	7.15998	7.41805	7.29576	7.44027	7.41196	7.5977	7.64828	7.49838	7.66051	7.59631	7.62249	7.76485	7.70161	7.7735	7.72945	7.91855	FALSE	0	0.00034186	0.00193	0.333	0.113456	0.244	0.12	1.66e-05	0.00316	0.452	-0.0383	-0.249	0.203	0.0837	TRUE	FALSE	TRUE	TRUE
P24638	Acp2	7.21807	7.35848	6.86411	7.14987	7.28529	6.86542	7.08161	6.96034	6.58033	6.7323	6.91369	6.58265	6.87776	6.66151	6.37282	6.50474	FALSE	0	0.0035376	0.0123	-0.445	0.454596	0.63	-0.098	0.00077369	0.0251	-0.543	0.173	0.272	-0.271	-0.173	TRUE	FALSE	TRUE	TRUE
P23953	Ces1c	9.90508	9.68234	9.39861	9.63332	9.50039	9.83411	9.83849	9.81365	10.2897	10.379	10.021	10.0979	9.96946	10.1267	10.2037	10.213	FALSE	0	0.000228856	0.00142	0.542	0.544578	0.704	-0.0687	0.000751001	0.0247	0.473	-0.185	-0.277	0.197	0.265	TRUE	FALSE	TRUE	TRUE
P21614	Gc	7.4164	7.14249	7.07087	7.09959	7.07377	7.35827	7.58929	7.47566	7.58451	7.81694	7.47013	7.6813	7.55204	7.50334	7.61082	7.58737	FALSE	0	0.000639973	0.00315	0.456	0.485869	0.658	-0.0748	0.00261837	0.0428	0.381	-0.0653	-0.257	0.124	0.199	TRUE	FALSE	TRUE	TRUE
P18528		3.74632	5.10451	4.91157	4.60042	5.31565	4.74666	5.39837	5.44781	6.81972	6.9894	6.73782	6.83362	6.27188	6.41898	6.23644	6.1476	TRUE	1	1.05e-07	3.69e-06	2.25	0.0245502	0.0801	-0.576	3.57e-06	0.00104	1.68	-0.506	-1.14	0.536	1.11	TRUE	FALSE	TRUE	TRUE
P14115	Rpl27a	10.8638	10.8972	10.6311	10.9113	10.5636	10.8367	10.4237	10.7877	10.2316	10.297	10.2533	10.4163	10.3551	10.2107	10.56	10.2998	FALSE	0	8.55e-05	0.000646	-0.526	0.56661	0.72	0.0568	0.000252665	0.0139	-0.469	0.119	0.292	-0.177	-0.234	TRUE	FALSE	TRUE	TRUE
P11276	Fn1	8.96707	8.84143	8.77152	8.88707	8.71768	8.89599	9.00898	9.01524	9.32968	9.28807	9.21079	9.37941	9.11959	9.30713	9.26026	9.07364	FALSE	0	2.79e-05	0.000264	0.435	0.141088	0.285	-0.112	0.000480555	0.0188	0.323	-0.158	-0.2	0.123	0.235	TRUE	FALSE	TRUE	TRUE
P10637	Mapt	13.8405	13.8612	13.6952	13.8287	13.6876	13.8356	13.7798	13.6881	15.2235	15.0191	15.1645	15.1759	14.8122	15.181	15.2922	15.0773	FALSE	0	1.86e-10	3e-08	1.34	0.520389	0.684	-0.0551	3.27e-10	2.37e-06	1.28	-0.7	-0.641	0.643	0.698	TRUE	FALSE	TRUE	TRUE
P10107	Anxa1	7.87253	7.58424	7.83909	7.55473	7.68697	7.83267	8.13559	8.05942	8.42176	8.49135	8.13157	8.26196	8.05541	8.04182	8.09807	8.15906	FALSE	0	4.11e-05	0.000357	0.614	0.0397004	0.114	-0.238	0.00299007	0.0456	0.376	-0.0855	-0.301	0.0744	0.313	TRUE	FALSE	TRUE	TRUE
P0C1Q2	Pde11a	6.61486	6.27256	6.81503	6.59855	7.08346	7.08632	7.10764	6.93289	6.83418	6.97862	7.187	7.07864	7.01953	7.0894	6.91578	7.13183	FALSE	0	0.000520936	0.00267	0.444	0.847197	0.912	0.0195	0.000357572	0.0169	0.464	0.131	-0.346	0.117	0.098	TRUE	FALSE	TRUE	TRUE
P08032	Spta1	7.82529	7.69504	7.61065	7.64073	7.50372	7.92378	7.88377	7.94012	8.20023	8.30451	8.25692	8.11628	7.94691	7.95603	8.00519	8.19229	FALSE	0	4.14e-05	0.000358	0.527	0.0488098	0.133	-0.194	0.00241914	0.0414	0.332	-0.125	-0.245	0.0875	0.282	TRUE	FALSE	TRUE	TRUE
P06909	Cfh	7.72183	7.6594	7.36976	7.46654	7.48823	7.50104	7.79041	7.73083	8.07005	8.24621	8.21896	8.07954	7.82601	8.07406	7.83885	7.94752	FALSE	0	1.15e-05	0.00013	0.599	0.0228344	0.0757	-0.232	0.00119452	0.0293	0.367	-0.187	-0.26	0.107	0.339	TRUE	FALSE	TRUE	TRUE
P06330		5.58727	4.66636	5.44893	5.91082	6.14734	6.52775	6.52406	6.03582	7.10568	6.8943	6.96174	7.10777	6.90577	6.94165	7.1742	7.01563	FALSE	0	1.12e-06	2.15e-05	1.61	0.968317	0.982	-0.00806	1.19e-06	0.000605	1.61	-0.126	-1.03	0.575	0.583	TRUE	FALSE	TRUE	TRUE
P05977	Myl1	7.78623	7.84044	7.848	8.18154	7.92139	8.17183	7.99373	8.22197	8.30154	8.00412	8.37154	8.06694	8.24469	8.30424	8.29127	8.45079	FALSE	0	0.018055	0.0456	0.272	0.200147	0.365	0.137	0.00124967	0.03	0.409	-0.0478	-0.211	0.198	0.061	TRUE	FALSE	TRUE	TRUE
P03930	Mtatp8	13.0807	12.5053	11.3221	11.7046	10.819	11.3947	10.769	11.2541	10.747	10.4955	10.4064	10.7157	10.7913	10.7216	11.4925	11.0479	FALSE	0	0.000151903	0.00104	-1.56	0.187997	0.349	0.422	0.00218668	0.0392	-1.14	-0.145	0.949	-0.191	-0.613	TRUE	FALSE	TRUE	TRUE
P02088	Hbb-b1	15.751	15.42	15.4552	15.356	15.4183	15.839	15.7486	15.8785	16.1291	16.1661	16.2793	16.1221	15.9013	15.977	16.0223	16.1464	FALSE	0	8.86e-06	0.000108	0.679	0.12824	0.266	-0.162	0.000146946	0.0107	0.516	-0.13	-0.355	0.161	0.324	TRUE	FALSE	TRUE	TRUE
P01942	Hba	15.4437	15.1094	15.1896	15.067	15.1559	15.5518	15.4714	15.5578	15.8994	15.7282	15.8247	15.8423	15.5234	15.6258	15.7036	15.7145	FALSE	0	1.05e-05	0.000122	0.621	0.0717509	0.176	-0.182	0.00033101	0.0165	0.439	-0.0913	-0.323	0.116	0.298	TRUE	FALSE	TRUE	TRUE
P01872	Ighm	6.7956	6.5865	6.58225	6.51039	7.0956	8.03889	8.22495	8.30223	8.57053	8.08763	8.98507	7.94125	8.11777	8.63838	8.31488	8.49909	FALSE	0	6.01e-06	7.94e-05	1.78	0.988924	0.993	-0.00359	6.15e-06	0.00154	1.77	0.0847	-1.21	0.562	0.565	TRUE	FALSE	TRUE	TRUE
P01867	Igh-3	9.56524	9.14844	9.17981	9.16144	8.87023	9.27343	9.27982	9.43031	10.5725	10.4779	10.5923	10.5218	10.31	10.8141	10.8234	10.7413	FALSE	0	1.36e-07	4.44e-06	1.28	0.33925	0.518	0.131	4e-08	6.54e-05	1.41	-0.709	-0.659	0.75	0.619	TRUE	FALSE	TRUE	TRUE
P01843		5.48928	5.51153	5.40747	5.6875	5.05366	5.79724	6.02318	5.98074	7.52288	7.55073	7.38556	7.29024	6.78821	7.17675	7.08198	6.80369	FALSE	0	2.08e-08	9.82e-07	1.91	0.0147697	0.0547	-0.475	7.1e-07	0.00043	1.44	-0.696	-0.885	0.553	1.03	TRUE	FALSE	TRUE	TRUE
P01654		6.08921	5.48839	4.96024	5.31003	5.44846	5.93453	6.83368	5.9533	7.36595	6.90826	6.75536	7.06567	6.11256	7.15102	7.16911	7.35337	FALSE	0	0.0002167	0.00137	1.56	0.810843	0.893	-0.0773	0.000343521	0.0166	1.48	-0.326	-0.907	0.578	0.655	TRUE	FALSE	TRUE	TRUE
P01027	C3	8.13668	7.95576	7.75194	7.79781	7.6112	7.67574	7.87697	7.79931	8.65553	8.71413	8.52331	8.56297	8.23307	8.44036	8.4678	8.33576	FALSE	0	9.05e-07	1.82e-05	0.703	0.0123102	0.0477	-0.245	9.49e-05	0.0084	0.459	-0.418	-0.248	0.211	0.455	TRUE	FALSE	TRUE	TRUE
O88834	Shd	13.9645	13.9078	13.5256	13.4589	13.1543	13.4844	13.3145	13.3082	13.2899	13.219	13.4996	13.4469	13.31	13.2749	13.0377	13.3532	FALSE	0	0.00920904	0.0266	-0.35	0.319541	0.498	-0.12	0.00118225	0.0293	-0.47	-0.094	0.305	-0.165	-0.0455	TRUE	FALSE	TRUE	TRUE
O88819	Fut9	6.55063	6.33621	6.42766	6.68297	6.21116	6.6465	6.40819	6.30476	5.80111	5.93454	5.94206	6.21415	6.08636	6.04538	5.85324	5.78252	FALSE	0	0.000287823	0.00169	-0.526	0.781921	0.875	-0.0311	0.000169552	0.0112	-0.557	0.191	0.298	-0.26	-0.229	TRUE	FALSE	TRUE	TRUE
O70443	Gnaz	11.9728	11.9448	11.8048	12.0027	11.7542	11.8295	11.6107	11.6877	11.4565	11.3746	11.5101	11.4312	11.595	11.6243	11.7959	11.6345	FALSE	0	8.46e-07	1.74e-05	-0.488	0.00223139	0.0128	0.219	0.000430332	0.0181	-0.269	0.0312	0.242	-0.0269	-0.246	TRUE	FALSE	TRUE	TRUE
O70422	Gtf2h4	7.40046	7.19421	7.35947	7.07669	7.14926	7.20204	7.22483	7.26865	6.93991	6.78945	6.89785	6.90554	6.77444	7.06376	6.92614	7.0525	FALSE	0	0.000181619	0.0012	-0.375	0.356905	0.538	0.071	0.001128	0.0288	-0.303	0.135	0.181	-0.122	-0.193	TRUE	FALSE	TRUE	TRUE
O70325	Gpx4	10.886	11.0027	11.1169	11.0984	11.0806	11.0852	10.9948	11.0662	11.5297	11.5217	11.5461	11.5568	11.2858	11.4115	11.2547	11.2282	FALSE	0	8.54e-08	3.14e-06	0.513	0.000300529	0.00269	-0.244	0.000118871	0.00944	0.269	-0.172	-0.203	0.066	0.309	TRUE	FALSE	TRUE	TRUE
O70258	Sgce	5.60748	4.59499	4.87173	5.47226	6.64437	5.88175	5.93295	5.52421	5.80596	6.02977	6.51263	6.09169	5.87474	6.21651	6.27766	6.92551	TRUE	6	0.00363658	0.0125	0.973	0.457711	0.632	0.214	0.000803241	0.0255	1.19	0.104	-0.755	0.432	0.219	TRUE	FALSE	TRUE	TRUE
O54990	Prom1	8.45209	8.42863	8.41876	8.51693	8.382	8.47236	8.4723	8.42595	7.98293	8.07426	7.95811	7.95625	8.21265	8.00111	8.12038	8.21343	FALSE	0	1.51e-07	4.7e-06	-0.461	0.009767	0.0398	0.144	1.19e-05	0.00264	-0.317	0.183	0.199	-0.119	-0.263	TRUE	FALSE	TRUE	TRUE
O35943	Fxn	8.44288	8.51124	8.17162	8.08901	7.81337	7.85507	7.66121	7.94742	7.78938	7.5788	7.71284	7.51652	7.67397	7.58535	7.79317	7.80178	FALSE	0	8.23e-06	0.000102	-0.654	0.515664	0.681	0.0642	2.5e-05	0.00406	-0.59	-0.0522	0.432	-0.158	-0.222	TRUE	FALSE	TRUE	TRUE
O35609	Scamp3	8.61203	8.8889	8.60897	8.66117	8.46386	8.60607	8.52816	8.7779	8.25604	8.39976	8.41932	8.23863	8.49335	8.31322	8.43142	8.31741	FALSE	0	0.000363598	0.00202	-0.364	0.453009	0.629	0.0604	0.00163265	0.0343	-0.304	0.093	0.192	-0.112	-0.173	TRUE	FALSE	TRUE	TRUE
O09159	Man2b1	7.74485	7.70387	7.69415	7.69879	7.81246	7.65061	7.93277	7.73537	8.09225	8.05117	7.96956	7.99336	7.93721	8.08205	8.02812	8.00275	FALSE	0	3.36e-05	0.000305	0.316	0.794973	0.884	-0.0141	5.35e-05	0.0054	0.302	-0.1	-0.173	0.129	0.144	TRUE	FALSE	TRUE	TRUE
O09114	Ptgds	11.3136	11.0404	11.1579	11.3559	11.041	11.4707	11.5373	10.7552	11.7961	11.7231	11.8634	11.8161	11.649	11.7112	11.6142	11.7579	FALSE	0	0.000672435	0.00327	0.583	0.40026	0.581	-0.117	0.00372805	0.0497	0.466	-0.274	-0.258	0.208	0.324	TRUE	FALSE	TRUE	TRUE
E9Q557	Dsp	7.10576	6.88518	7.00775	7.069	6.82274	6.96113	7.13383	7.07728	6.75485	6.88068	6.51851	6.65855	6.72979	6.50488	6.77908	6.52218	FALSE	0	0.00360743	0.0125	-0.314	0.455207	0.63	-0.0692	0.000790228	0.0252	-0.383	0.161	0.179	-0.204	-0.135	TRUE	FALSE	TRUE	TRUE
A6X935	Itih4	7.57016	7.45799	7.37177	7.14699	7.4106	7.30428	7.49237	7.64465	8.01049	8.27086	7.9004	7.88207	7.87945	7.91925	7.95706	7.87672	FALSE	0	1.6e-05	0.00017	0.629	0.291413	0.47	-0.108	0.000108945	0.0091	0.521	-0.23	-0.307	0.215	0.323	TRUE	FALSE	TRUE	TRUE
A6H8H5	Kcnb2	6.7155	6.54281	6.52576	6.75077	6.62373	6.60366	6.52845	6.53471	6.22788	6.16633	5.78014	6.13509	6.22861	6.30549	6.47368	6.26846	FALSE	0	1.82e-05	0.000186	-0.556	0.0156925	0.0572	0.242	0.00301515	0.0456	-0.315	0.172	0.233	-0.0816	-0.323	TRUE	FALSE	TRUE	TRUE
A6H6E2	Mmrn2	5.93793	5.74291	5.8165	5.89479	6.14303	5.82825	5.76565	5.56553	6.67267	7.20213	6.78005	7.41553	6.69485	6.52416	6.81826	6.52107	TRUE	6	1.79e-06	3.15e-05	1.17	0.0246863	0.0804	-0.378	0.000116405	0.0094	0.792	-0.507	-0.485	0.307	0.685	TRUE	FALSE	TRUE	TRUE
A2ATU0	Dhtkd1	6.94424	6.42234	6.9176	6.57916	6.72412	6.9051	6.79996	6.99076	6.00058	5.84285	6.21952	5.91433	5.90151	5.5866	5.7571	6.30874	FALSE	0	0.000238892	0.00146	-0.722	0.486151	0.658	-0.106	6.43e-05	0.00623	-0.827	0.492	0.352	-0.475	-0.369	TRUE	FALSE	TRUE	TRUE
A2ARS0	Ankrd63	8.41251	8.30344	8.18525	8.37829	7.91478	8.19692	8.08928	8.06412	7.71207	7.76523	7.92291	7.79623	7.97416	8.1801	7.97706	7.82142	FALSE	0	1.09e-05	0.000126	-0.521	0.0304443	0.0936	0.189	0.000842685	0.0262	-0.332	0.0229	0.277	-0.0552	-0.244	TRUE	FALSE	TRUE	TRUE
A2APF3	Ctcfl	12.3219	11.6815	8.924	9.20837	8.99175	9.43244	9.58154	9.69773	7.78287	7.38458	7.73486	7.57184	8.02165	8.26277	8.75087	8.75395	FALSE	0	0.000194456	0.00126	-2.92	0.178081	0.335	0.829	0.0030472	0.0458	-2.09	0.419	1.53	-0.559	-1.39	TRUE	FALSE	TRUE	TRUE
Q9Z329	Itpr2	9.17246	9.14927	9.07344	9.04913	8.99027	9.17608	9.13954	9.0759	9.44451	9.47071	9.38367	9.44389	9.03718	9.04636	9.07294	9.06843	FALSE	0	1.97e-06	3.39e-05	0.325	3.09e-07	1.47e-05	-0.379	0.213355	0.46	-0.0548	-0.0792	-0.0635	-0.118	0.261	TRUE	TRUE	FALSE	TRUE
Q9Z306	Slc22a4	5.32203	5.40319	5.28223	5.1958	5.54996	5.15881	5.22093	5.79677	6.15252	6.14488	5.83186	5.71734	5.42682	5.38578	5.64493	4.91288	TRUE	3	0.00106668	0.00474	0.661	0.00177858	0.0107	-0.619	0.799241	0.911	0.0418	-0.0776	-0.208	-0.167	0.452	TRUE	TRUE	FALSE	TRUE
Q9Z2I8	Suclg2	9.29402	9.10117	9.13119	9.26398	9.13545	9.18724	9.2355	9.26227	9.83589	9.8507	9.78823	9.78617	9.28839	9.48216	9.47536	9.4075	FALSE	0	1.2e-08	6.58e-07	0.618	2.33e-06	6.73e-05	-0.402	0.00110314	0.0288	0.216	-0.203	-0.21	0.00553	0.407	TRUE	TRUE	FALSE	TRUE
Q9Z2C5	Mtm1	7.83666	7.9272	7.89622	7.74914	8.02773	7.89745	7.88694	7.9256	8.21922	8.24368	8.25508	8.23848	7.95836	7.89028	7.95855	7.95938	FALSE	0	2.35e-07	6.57e-06	0.387	5.15e-06	0.000122	-0.297	0.0512851	0.207	0.0893	-0.0574	-0.14	-0.0502	0.247	TRUE	TRUE	FALSE	TRUE
Q9Z2A9	Ggt5	7.82727	7.17109	7.10298	7.37091	7.38713	7.30987	7.82071	7.58969	7.84549	7.98938	7.70914	7.66308	6.96404	7.51657	7.44033	7.29703	FALSE	0	0.0175712	0.0447	0.434	0.00805286	0.0345	-0.497	0.699511	0.856	-0.0636	0.0266	-0.132	-0.196	0.301	TRUE	TRUE	FALSE	TRUE
Q9Z280	Pld1	6.89229	7.198	7.11714	7.25675	7.1604	7.29593	7.07614	7.05122	7.61179	7.74889	7.58071	7.56609	7.27041	7.2379	7.15922	7.40795	FALSE	0	1.64e-05	0.000174	0.511	0.000515668	0.00407	-0.358	0.0768013	0.259	0.153	-0.144	-0.173	-0.0206	0.337	TRUE	TRUE	FALSE	TRUE
Q9Z1T2	Thbs4	7.05931	7.09331	6.67975	7.12025	6.69242	6.7983	6.89494	6.84798	7.47948	7.54473	7.38229	7.28196	6.86037	6.78009	6.89825	6.87319	FALSE	0	0.000191474	0.00125	0.434	1.24e-05	0.000238	-0.569	0.141933	0.363	-0.135	-0.21	-0.0298	-0.165	0.404	TRUE	TRUE	FALSE	TRUE
Q9Z1S3	Rasgrp1	8.34316	8.37312	8.17116	8.26162	8.29392	8.4537	8.40769	8.376	7.9027	7.8049	7.92945	7.96189	8.28924	8.18766	8.3557	8.41004	FALSE	0	9.45e-06	0.000112	-0.388	4.93e-06	0.000117	0.411	0.691381	0.852	0.0234	0.163	0.0671	0.0905	-0.32	TRUE	TRUE	FALSE	TRUE
Q9Z1Q5	Clic1	8.99154	8.80612	8.76721	8.73664	8.73977	8.62452	8.69277	8.68855	9.32323	9.39759	9.26749	9.2342	8.7976	8.82049	8.99809	8.83738	FALSE	0	1.23e-06	2.32e-05	0.48	3.19e-06	8.54e-05	-0.442	0.535039	0.75	0.038	-0.234	-0.0948	-0.0568	0.385	TRUE	TRUE	FALSE	TRUE
Q9Z1M0	P2rx7	8.57915	8.55084	8.53702	8.58435	8.63711	8.64649	8.61655	8.64943	8.97345	9.06653	8.99258	8.93446	8.71603	8.77113	8.66649	8.61904	FALSE	0	1.38e-08	7.28e-07	0.429	1.21e-06	3.94e-05	-0.299	0.00341551	0.0479	0.13	-0.0839	-0.158	-0.0281	0.27	TRUE	TRUE	FALSE	TRUE
Q9Z1L5	Cacna2d3	11.0046	10.8747	10.885	10.7486	10.9074	10.9324	10.8712	10.8978	10.5631	10.4694	10.5196	10.6019	10.8479	10.8581	10.9562	10.9125	FALSE	0	6.09e-06	8.01e-05	-0.34	3.69e-06	9.57e-05	0.355	0.75507	0.886	0.0155	0.099	0.0751	0.0905	-0.265	TRUE	TRUE	FALSE	TRUE
Q9Z1G4	Atp6v0a1	13.9332	14.0195	13.9344	13.9204	13.991	13.9275	13.9261	13.9632	13.6624	13.6405	13.6672	13.7047	13.916	13.8854	13.968	13.9893	FALSE	0	8.14e-07	1.7e-05	-0.283	1.37e-06	4.36e-05	0.271	0.725137	0.868	-0.0122	0.0739	0.0738	0.0616	-0.209	TRUE	TRUE	FALSE	TRUE
Q9Z140	Cpne6	12.5929	12.7261	12.5998	12.6054	12.6564	12.6056	12.5806	12.631	12.2149	12.2594	12.2972	12.2406	12.6262	12.588	12.6449	12.6097	FALSE	0	3.75e-08	1.56e-06	-0.378	6.01e-08	4.25e-06	0.364	0.701319	0.856	-0.0139	0.0885	0.101	0.0873	-0.277	TRUE	TRUE	FALSE	TRUE
Q9Z0U1	Tjp2	9.27253	9.27956	9.25489	9.24919	9.16304	9.18871	9.07489	9.19343	9.71063	9.76814	9.65351	9.70469	9.31741	9.33869	9.40616	9.33188	FALSE	0	4.84e-09	3.55e-07	0.445	7.15e-08	4.85e-06	-0.361	0.032089	0.156	0.0845	-0.214	-0.105	-0.0207	0.34	TRUE	TRUE	FALSE	TRUE
Q9Z0M6	Adgre5	4.58596	3.97308	4.0888	4.02541	3.99867	4.37607	4.34177	4.12066	4.80334	4.62103	4.78286	4.66555	3.95173	3.68832	3.39968	4.55805	TRUE	4	0.0146667	0.0386	0.55	0.000985931	0.00674	-0.819	0.195452	0.436	-0.269	-0.0395	-0.0805	-0.349	0.469	TRUE	TRUE	FALSE	TRUE
Q9Z0J0	Npc2	9.53167	9.11913	8.99297	9.2334	8.98591	9.16896	9.38393	9.27399	9.84349	9.76132	9.77089	9.68484	9.18219	9.51512	9.46222	9.31996	FALSE	0	0.000197319	0.00127	0.546	0.00283478	0.0154	-0.395	0.191095	0.432	0.151	-0.186	-0.17	-0.0195	0.376	TRUE	TRUE	FALSE	TRUE
Q9Z0F8	Adam17	6.02215	6.13217	6.40388	6.33032	6.60169	6.4332	6.21995	6.69738	7.01828	6.96597	7.16539	7.23678	6.59415	6.34016	6.19366	6.09832	FALSE	0	4.94e-06	6.86e-05	0.874	1.51e-05	0.000275	-0.79	0.503094	0.726	0.0844	-0.0403	-0.306	-0.222	0.568	TRUE	TRUE	FALSE	TRUE
Q9Z0E0	Ncdn	15.1921	15.1964	15.1191	15.1249	15.1364	15.0679	15.208	15.2037	14.7423	14.7003	14.6693	14.7409	15.0489	14.9727	15.1168	15.1272	FALSE	0	5.52e-08	2.15e-06	-0.445	9.3e-07	3.25e-05	0.353	0.0506661	0.205	-0.0917	0.131	0.135	0.0435	-0.31	TRUE	TRUE	FALSE	TRUE
Q9WVL2	Stat2	7.56375	7.36152	7.38814	7.19209	7.22428	7.60154	7.41038	7.38614	7.88995	7.69447	8.01632	7.99273	7.45794	7.66339	7.27631	7.65723	FALSE	0	0.000235104	0.00145	0.522	0.00286532	0.0156	-0.385	0.219435	0.469	0.137	-0.143	-0.172	-0.0348	0.35	TRUE	TRUE	FALSE	TRUE
Q9WV95	Phlda3	6.30676	6.58199	6.39477	6.69413	6.92212	6.84296	6.53569	6.62449	6.74249	6.97731	7.1528	6.94406	6.65263	6.41985	6.47451	6.54828	FALSE	0	0.000703164	0.00339	0.46	0.00120598	0.00782	-0.43	0.786723	0.904	0.0294	0.0554	-0.182	-0.152	0.278	TRUE	TRUE	FALSE	TRUE
Q9WV91	Ptgfrn	7.35873	7.11629	7.45131	7.21483	7.17129	7.1916	7.231	7.22186	7.54931	7.4475	7.54392	7.73477	7.20617	7.28039	7.12841	7.26881	FALSE	0	0.00126943	0.00546	0.284	0.000220007	0.00211	-0.348	0.378165	0.625	-0.0643	-0.116	-0.0345	-0.0988	0.249	TRUE	TRUE	FALSE	TRUE
Q9WV32	Arpc1b	8.16429	7.99991	8.09956	8.0207	8.04006	7.9971	8.11788	8.05585	8.99778	9.08097	8.96672	9.00133	8.14659	8.37927	8.27384	8.37486	FALSE	0	6.01e-11	1.46e-08	0.941	2.21e-09	3.74e-07	-0.718	0.00102028	0.0284	0.223	-0.305	-0.286	-0.0637	0.654	TRUE	TRUE	FALSE	TRUE
Q9WV02	Rbmx	10.6853	10.835	10.67	10.6041	10.5282	10.6348	10.5841	10.7507	10.2	10.3492	10.181	10.3799	10.5251	10.3758	10.6069	10.6581	FALSE	0	4.11e-05	0.000357	-0.421	0.00252189	0.0141	0.264	0.0466256	0.195	-0.157	0.0889	0.163	0.00598	-0.258	TRUE	TRUE	FALSE	TRUE
Q9WUP4	Srd5a3	9.17342	9.26952	9.07623	9.2199	9.3523	9.2178	9.3397	9.31061	9.48322	9.50594	9.48273	9.39411	9.1846	9.23661	9.13823	9.04219	FALSE	0	7.46e-05	0.000579	0.282	2.3e-05	0.000379	-0.316	0.51254	0.732	-0.0344	0.0284	-0.0919	-0.126	0.19	TRUE	TRUE	FALSE	TRUE
Q9WUK6	Zbtb18	8.34894	8.58594	8.54079	8.68087	8.90368	8.70393	8.81206	8.68802	8.2783	8.10462	8.15555	8.28759	8.45384	8.4154	8.54566	8.51769	FALSE	0	0.000306863	0.00177	-0.333	0.00144297	0.00911	0.277	0.43785	0.671	-0.056	0.275	0.0377	-0.0183	-0.295	TRUE	TRUE	FALSE	TRUE
Q9WU79	Prodh	10.075	10.0424	10.2625	10.0334	10.0204	10.0574	10.172	10.1143	10.499	10.5147	10.4949	10.4494	10.2064	10.232	10.0279	10.2522	FALSE	0	1.14e-05	0.00013	0.386	0.000109873	0.00125	-0.31	0.213051	0.459	0.0763	-0.125	-0.113	-0.0362	0.274	TRUE	TRUE	FALSE	TRUE
Q9WTT4	Atp6v1g2	14.0342	13.9312	13.9231	13.8701	14.0386	13.8323	13.9196	13.8374	13.6789	13.5376	13.7005	13.617	13.886	13.8125	14.0573	13.9358	FALSE	0	0.000177889	0.00117	-0.306	0.000298344	0.00268	0.289	0.787077	0.904	-0.0167	0.0562	0.0889	0.0721	-0.217	TRUE	TRUE	FALSE	TRUE
Q9WTR6	Slc7a11	8.35086	8.50324	8.66135	8.52712	8.70891	8.55584	8.69166	8.73439	9.11044	9.20714	9.11242	8.9158	8.64781	8.65024	8.4632	8.48377	FALSE	0	2.04e-06	3.46e-05	0.576	5.8e-06	0.000134	-0.525	0.50996	0.73	0.0506	-0.0351	-0.197	-0.147	0.379	TRUE	TRUE	FALSE	TRUE
Q9WTP6	Ak2	8.491	8.24853	8.42369	8.28802	8.45662	8.54084	8.5356	8.58972	8.73329	8.83548	8.62941	8.72179	8.28146	8.38643	8.31951	8.31967	FALSE	0	1.3e-05	0.000144	0.367	4.62e-06	0.000114	-0.403	0.53248	0.747	-0.036	0.0431	-0.125	-0.161	0.242	TRUE	TRUE	FALSE	TRUE
Q9WTI7	Myo1c	7.47124	7.35616	7.37208	7.3147	7.20876	7.40998	7.52592	7.58987	7.76162	7.81546	7.61433	7.75505	7.42974	7.52079	7.4905	7.37679	FALSE	0	0.000198845	0.00128	0.358	0.00151757	0.00946	-0.282	0.30942	0.557	0.0759	-0.0672	-0.122	-0.0464	0.236	TRUE	TRUE	FALSE	TRUE
Q9R1Z8	Sorbs3	8.3411	8.13715	8.51413	8.42568	8.28759	8.43562	8.2341	8.34683	8.92721	9.06415	9.00623	8.98359	8.4174	8.53548	8.46324	8.33615	FALSE	0	3.49e-07	9.03e-06	0.641	1.83e-06	5.43e-05	-0.557	0.26376	0.512	0.0836	-0.202	-0.174	-0.0904	0.467	TRUE	TRUE	FALSE	TRUE
Q9R112	Sqor	8.67469	8.37776	8.21013	8.24345	8.24504	8.23137	8.66213	8.50803	9.01589	9.06623	8.8827	9.00942	8.39082	8.69254	8.70008	8.55188	FALSE	0	8.4e-05	0.000637	0.617	0.00278262	0.0152	-0.41	0.0886405	0.279	0.207	-0.18	-0.215	-0.00755	0.402	TRUE	TRUE	FALSE	TRUE
Q9R0N0	Galk1	9.61471	9.58241	9.66825	9.74999	9.35985	9.62663	9.54629	9.79451	9.9577	10.0353	9.89891	9.82078	9.67499	9.54921	9.6151	9.55166	FALSE	0	0.00285931	0.0104	0.274	0.000669933	0.00499	-0.33	0.473627	0.704	-0.0561	-0.109	-0.0366	-0.0927	0.238	TRUE	TRUE	FALSE	TRUE
Q9R0A1	Clcn2	6.44693	6.37769	6.35669	6.40907	6.21239	6.57201	6.39429	6.34295	6.79608	6.89745	6.73381	6.85766	6.36177	6.36099	6.3939	6.43243	FALSE	0	6.35e-06	8.26e-05	0.424	4.85e-06	0.000117	-0.434	0.867743	0.949	-0.0103	-0.116	-0.099	-0.109	0.325	TRUE	TRUE	FALSE	TRUE
Q9R008	Mvk	8.68365	8.60573	8.52179	8.80514	8.45627	8.74083	8.63441	8.68957	8.33621	8.36146	8.21121	8.4736	8.63374	8.71348	8.57647	8.6597	FALSE	0	0.000791346	0.00373	-0.308	0.000987731	0.00674	0.3	0.9113	0.967	-0.00823	0.0613	0.0851	0.0769	-0.223	TRUE	TRUE	FALSE	TRUE
Q9QZF2	Gpc1	9.84248	9.89954	9.80647	9.84415	9.88591	9.86266	9.87973	9.78406	9.46671	9.4891	9.47454	9.50751	9.91956	9.90107	9.90809	9.97032	FALSE	0	2.01e-08	9.61e-07	-0.364	1.68e-09	2.97e-07	0.44	0.0329918	0.159	0.0766	0.0755	0.0705	0.147	-0.293	TRUE	TRUE	FALSE	TRUE
Q9QZA0	Ca5b	9.28717	8.75775	9.24675	9.04712	9.03367	9.2168	9.24113	9.04401	9.73049	9.19275	9.68194	9.62014	9.03319	9.3679	8.99727	9.23564	FALSE	0	0.00320283	0.0113	0.472	0.00968492	0.0396	-0.398	0.587918	0.787	0.0738	-0.0995	-0.149	-0.0749	0.323	TRUE	TRUE	FALSE	TRUE
Q9QZ85	Iigp1	6.42148	6.21732	6.51344	6.90431	6.58039	7.30866	6.2728	6.27878	7.86115	7.75408	7.48481	7.55541	6.98298	6.85119	7.34217	6.93905	TRUE	1	6.76e-05	0.000536	1.15	0.00819469	0.0349	-0.635	0.0258013	0.137	0.515	-0.344	-0.44	0.0746	0.71	TRUE	TRUE	FALSE	TRUE
Q9QYZ8	Dkk2	5.71545	5.74147	5.90708	5.83653	5.56325	5.72986	5.56694	6.22127	4.97476	5.35189	5.11661	5.50046	5.7174	5.69337	5.64169	6.09432	FALSE	0	0.00191525	0.00753	-0.564	0.00229259	0.013	0.551	0.929124	0.975	-0.0134	0.122	0.152	0.138	-0.412	TRUE	TRUE	FALSE	TRUE
Q9QYY0	Gab1	7.47381	7.3874	7.41139	7.44616	7.44929	7.45936	7.40309	7.4391	7.8648	7.96116	7.8813	7.81165	7.44796	7.69982	7.39034	7.57433	FALSE	0	1.28e-06	2.39e-05	0.45	2.03e-05	0.000346	-0.352	0.101798	0.301	0.0984	-0.131	-0.139	-0.0407	0.311	TRUE	TRUE	FALSE	TRUE
Q9QYX7	Pclo	12.2428	12.172	12.2014	12.228	12.195	12.2874	12.2345	12.1979	11.8115	11.8014	11.8376	11.8105	12.171	12.1811	12.1946	12.248	FALSE	0	4.04e-09	3.16e-07	-0.396	6.11e-09	7.65e-07	0.383	0.697871	0.855	-0.0123	0.115	0.0976	0.0853	-0.298	TRUE	TRUE	FALSE	TRUE
Q9QYS9	Qki	10.7284	10.8372	10.8047	10.7494	10.827	10.7644	10.7698	10.8035	11.0792	11.1241	11.0735	11.1053	10.7735	10.7416	10.6798	10.7007	FALSE	0	1.81e-07	5.4e-06	0.316	2.33e-08	2.06e-06	-0.372	0.116536	0.325	-0.056	-0.0565	-0.0677	-0.124	0.248	TRUE	TRUE	FALSE	TRUE
Q9QYE9	Plekhb1	8.28333	8.60261	8.71647	8.54348	8.51857	8.52227	8.33005	8.37651	9.34344	9.19623	9.23386	9.16869	8.43238	8.67394	8.51911	8.45874	FALSE	0	7.62e-07	1.62e-05	0.699	5.87e-07	2.29e-05	-0.715	0.856162	0.942	-0.0154	-0.246	-0.146	-0.161	0.553	TRUE	TRUE	FALSE	TRUE
Q9QY42	Gpr37	8.40775	8.4962	8.2065	8.55616	8.20984	8.33966	8.45392	8.36786	8.76526	8.70239	8.64311	8.72058	8.36127	8.36299	8.52433	8.35776	FALSE	0	0.00108319	0.0048	0.291	0.000716341	0.00527	-0.306	0.835451	0.93	-0.0151	-0.124	-0.0506	-0.0656	0.241	TRUE	TRUE	FALSE	TRUE
Q9QY40	Plxnb3	5.79493	5.90086	5.91714	5.38465	6.1723	6.11542	6.09968	6.15866	6.13733	6.29239	6.15118	6.23007	6.096	5.70837	5.74742	5.90044	FALSE	0	0.000710251	0.00341	0.453	0.00602739	0.0277	-0.34	0.298376	0.547	0.114	0.149	-0.239	-0.125	0.215	TRUE	TRUE	FALSE	TRUE
Q9QY06	Myo9b	5.39013	5.42974	4.99178	5.48656	5.77009	5.4574	5.94246	5.57673	6.04964	6.31344	5.86131	6.00765	5.0342	5.62802	5.70197	5.43786	FALSE	0	0.000313399	0.0018	0.733	0.00151713	0.00946	-0.607	0.429889	0.664	0.126	0.0567	-0.305	-0.179	0.428	TRUE	TRUE	FALSE	TRUE
Q9QXH4	Itgax	6.56634	6.54688	6.6809	6.41755	7.12313	6.57543	6.72776	6.04174	7.32151	6.82294	7.21142	7.63114	6.45981	6.21355	6.75655	6.78177	TRUE	5	0.00458851	0.0151	0.694	0.00458856	0.0225	-0.694	0.999995	1	1.19e-06	-0.125	-0.189	-0.189	0.504	TRUE	TRUE	FALSE	TRUE
Q9QXE0	Hacl1	7.5927	7.25089	7.11455	7.28383	7.36564	7.2858	7.27366	7.29258	7.47941	7.71859	7.69496	7.42198	7.35648	6.99326	7.33693	7.19395	FALSE	0	0.0196931	0.0488	0.268	0.00338957	0.0177	-0.359	0.390707	0.634	-0.0903	-0.049	-0.043	-0.133	0.225	TRUE	TRUE	FALSE	TRUE
Q9QUP5	Hapln1	10.9355	10.9559	10.8809	11.0169	10.9127	10.9825	10.9457	10.8538	11.3433	11.2737	11.3573	11.3762	10.9843	11.0481	11.0559	10.8797	FALSE	0	5.94e-07	1.34e-05	0.39	2.48e-06	6.95e-05	-0.346	0.344675	0.592	0.0447	-0.126	-0.103	-0.0582	0.287	TRUE	TRUE	FALSE	TRUE
Q9JM63	Kcnj10	8.95995	8.91301	8.68528	8.90248	8.62255	8.50848	8.60698	8.58893	9.24676	9.12646	9.03533	9.21782	8.65226	8.56735	8.83754	8.74345	FALSE	0	0.000863481	0.00402	0.291	1.16e-05	0.000227	-0.456	0.0318043	0.155	-0.165	-0.244	0.0393	-0.126	0.331	TRUE	TRUE	FALSE	TRUE
Q9JLV1	Bag3	9.22057	9.27212	9.32995	9.22771	9.33391	9.18621	9.27312	9.27985	9.85555	9.94378	9.79544	9.92726	9.2293	9.4482	9.27821	9.37201	FALSE	0	9.37e-09	5.67e-07	0.618	4.29e-08	3.25e-06	-0.549	0.202676	0.446	0.0693	-0.168	-0.173	-0.104	0.445	TRUE	TRUE	FALSE	TRUE
Q9JLR1	Sec61a2	7.33918	7.14502	6.99963	6.75025	7.14856	7.32213	7.39377	7.53346	6.43836	6.59731	6.27598	6.71874	6.98492	7.08463	7.28845	7.12083	FALSE	0	0.000549728	0.00278	-0.551	0.000215124	0.00208	0.612	0.629621	0.814	0.0612	0.341	0.0497	0.111	-0.501	TRUE	TRUE	FALSE	TRUE
Q9JLQ0	Cd2ap	8.52577	8.27393	8.33897	8.38014	8.21559	8.40486	8.34964	8.43412	8.85056	8.89854	8.90425	8.7422	8.42108	8.53827	8.40909	8.45205	FALSE	0	1.93e-06	3.34e-05	0.469	1.37e-05	0.000257	-0.394	0.234369	0.482	0.0754	-0.158	-0.129	-0.0536	0.34	TRUE	TRUE	FALSE	TRUE
Q9JL62	Gltp	9.46933	9.63821	9.47648	9.39315	9.46059	9.38821	9.40629	9.50813	10.1155	10.1867	10.1096	9.9818	9.4678	9.52548	9.43325	9.59917	FALSE	0	4.53e-08	1.83e-06	0.604	5.85e-08	4.21e-06	-0.592	0.835635	0.93	0.0121	-0.194	-0.141	-0.129	0.463	TRUE	TRUE	FALSE	TRUE
Q9JL16	Isg20	4.73605	4.61378	4.95987	4.63978	4.49204	5.09844	4.16971	4.45531	5.60703	5.62965	5.42986	5.71672	4.94637	5.05115	5.01208	5.13351	TRUE	6	4.07e-05	0.000355	0.858	0.00185988	0.0111	-0.56	0.0612285	0.23	0.298	-0.427	-0.243	0.0551	0.615	TRUE	TRUE	FALSE	TRUE
Q9JL04	Fmn2	9.06833	9.13308	9.19502	9.15566	9.19253	9.0371	8.95349	9.1077	8.75152	8.54915	9.00959	8.74551	9.10625	9.05191	9.10102	9.12064	FALSE	0	0.000223066	0.0014	-0.374	0.000656769	0.00491	0.331	0.580583	0.781	-0.0431	0.0553	0.121	0.0775	-0.253	TRUE	TRUE	FALSE	TRUE
Q9JKZ2	Slc5a3	6.65955	6.51947	6.49745	6.66417	6.54558	6.59199	6.87683	6.5971	7.38968	7.57667	7.35874	7.50447	6.74635	6.89684	6.83383	6.85092	FALSE	0	8.59e-09	5.29e-07	0.872	5.51e-07	2.18e-05	-0.625	0.00433497	0.0533	0.247	-0.229	-0.297	-0.0499	0.576	TRUE	TRUE	FALSE	TRUE
Q9JKP5	Mbnl1	8.83999	8.64561	8.51552	8.61015	8.72745	8.77905	8.74175	8.91189	8.98099	9.00169	8.97292	8.9781	8.65638	8.70398	8.79327	8.68695	FALSE	0	7.74e-05	0.000596	0.331	0.000455427	0.00371	-0.273	0.357258	0.603	0.0573	0.00593	-0.131	-0.074	0.199	TRUE	TRUE	FALSE	TRUE
Q9JKF1	Iqgap1	8.49649	8.21551	8.17532	8.19406	8.121	8.26703	8.55408	8.46498	8.84871	8.97763	8.84456	8.83948	8.39467	8.48404	8.45956	8.519	FALSE	0	7.1e-06	9.06e-05	0.607	0.000340332	0.00297	-0.413	0.0448841	0.191	0.194	-0.139	-0.221	-0.0267	0.387	TRUE	TRUE	FALSE	TRUE
Q9JK92	Hspb8	7.0059	6.83651	7.05113	7.00843	6.95592	6.90738	7.08934	6.8378	7.6844	7.5882	7.61398	7.58442	7.10334	7.27008	7.19804	7.25653	FALSE	0	3.14e-08	1.36e-06	0.642	6.66e-06	0.000149	-0.411	0.00155988	0.0337	0.232	-0.239	-0.211	0.02	0.431	TRUE	TRUE	FALSE	TRUE
Q9JJV5	Cacng3	8.30459	8.44357	8.69146	8.5707	8.61855	8.50478	8.36813	8.50059	8.09065	8.04054	8.2442	8.20875	8.50063	8.48517	8.55014	8.31719	FALSE	0	0.000621945	0.00307	-0.357	0.00159967	0.00981	0.317	0.637059	0.819	-0.0393	0.0955	0.1	0.0608	-0.256	TRUE	TRUE	FALSE	TRUE
Q9JI59	Jam2	7.44622	7.64478	7.4978	7.50563	7.33124	7.42499	7.31232	7.56903	7.68497	7.96774	7.89615	7.7889	7.53773	7.39559	7.27137	7.45533	FALSE	0	0.00103449	0.00463	0.311	6.91e-05	0.000873	-0.419	0.172417	0.406	-0.109	-0.136	-0.022	-0.131	0.289	TRUE	TRUE	FALSE	TRUE
Q9JHK5	Plek	7.94289	7.87972	7.89945	7.73891	7.90991	7.73301	8.09135	7.98977	8.75755	8.49571	8.50301	8.51677	7.98925	7.94323	7.85122	7.77913	FALSE	0	4.29e-07	1.08e-05	0.703	6.68e-07	2.54e-05	-0.678	0.755245	0.886	0.0255	-0.133	-0.199	-0.173	0.504	TRUE	TRUE	FALSE	TRUE
Q9JHJ8	Icoslg	7.61674	7.80617	7.96469	8.07503	8.19168	8.14244	7.95638	8.0573	8.5493	8.35082	8.68178	8.4195	7.91317	8.01662	8.01596	7.91131	FALSE	0	7.27e-06	9.17e-05	0.635	4.39e-05	0.000611	-0.536	0.303423	0.552	0.0986	-0.0174	-0.239	-0.14	0.396	TRUE	TRUE	FALSE	TRUE
Q9JHG6	Rcan1	8.11782	8.0949	8.22133	8.09028	8.11685	8.03164	8.16028	8.06524	7.86216	7.73943	7.76088	7.73723	8.00476	8.04793	7.99427	8.14415	FALSE	0	1.95e-06	3.36e-05	-0.356	3.63e-05	0.000532	0.273	0.0922886	0.285	-0.0833	0.0817	0.119	0.036	-0.237	TRUE	TRUE	FALSE	TRUE
Q9ET77	Jph3	8.02383	8.18892	7.98343	8.06777	7.8	8.20821	7.86136	8.16992	7.68946	7.64339	7.4048	7.68531	7.87905	7.73702	7.9329	8.04543	FALSE	0	0.00034912	0.00196	-0.46	0.00995645	0.0404	0.293	0.110957	0.315	-0.167	0.115	0.171	0.00355	-0.289	TRUE	TRUE	FALSE	TRUE
Q9ET54	Palld	7.11457	6.91893	6.89648	6.64162	7.3677	6.76092	7.43817	7.28947	7.49515	7.64316	7.2415	7.51043	6.94886	7.08694	6.95615	7.13333	FALSE	0	0.000775699	0.00367	0.58	0.00582773	0.0271	-0.441	0.326017	0.574	0.138	0.0614	-0.26	-0.121	0.32	TRUE	TRUE	FALSE	TRUE
Q9ET43	Cldn12	8.59398	8.45162	8.38212	8.45691	8.21067	8.45133	8.41257	8.38773	8.24938	7.98959	8.29314	8.2646	8.49699	8.46661	8.55432	8.5367	FALSE	0	0.00153996	0.00634	-0.272	0.000467193	0.00378	0.314	0.55077	0.76	0.0425	-0.0218	0.0838	0.126	-0.188	TRUE	TRUE	FALSE	TRUE
Q9ESP1	Sdf2l1	6.78493	7.05305	6.90946	6.90358	7.12163	7.0822	7.1151	6.86418	7.08302	7.21768	7.24913	7.39118	6.97204	7.06424	6.76075	7.06233	FALSE	0	0.00196669	0.00768	0.322	0.00666223	0.0297	-0.27	0.550388	0.76	0.0521	0.00612	-0.127	-0.0748	0.196	TRUE	TRUE	FALSE	TRUE
Q9ESN4	C1ql3	8.97418	8.82943	9.17779	8.82959	8.70981	9.11861	8.84307	8.79914	8.47211	8.38731	8.60944	8.64866	8.97101	8.98223	8.71401	9.13348	FALSE	0	0.00142315	0.00597	-0.423	0.00149207	0.00934	0.421	0.981232	0.993	-0.00257	0.0427	0.128	0.125	-0.296	TRUE	TRUE	FALSE	TRUE
Q9ESK3	Capn10	6.98355	7.32132	7.15127	7.08413	7.16953	7.00718	7.19068	7.11698	6.7534	6.73978	6.70435	6.6633	7.10847	7.04167	6.92672	6.87398	FALSE	0	2.69e-05	0.000257	-0.42	0.00142548	0.00901	0.273	0.0506184	0.205	-0.147	0.131	0.145	-0.00206	-0.275	TRUE	TRUE	FALSE	TRUE
Q9ERZ3	Chrm3	7.64177	7.76367	8.14216	7.82385	8.05348	7.75244	8.09007	7.9116	7.555	7.50789	7.63095	7.48469	7.949	7.90089	7.72184	7.79251	FALSE	0	0.00822303	0.0243	-0.298	0.00853322	0.036	0.296	0.985432	0.994	-0.0018	0.157	0.0478	0.0459	-0.25	TRUE	TRUE	FALSE	TRUE
Q9ERS5	Plekha2	6.07852	6.2792	6.26807	6.55665	6.59259	6.7325	6.59739	6.24969	6.03061	5.89728	5.86237	6.16452	6.31109	6.30851	6.47803	6.33949	FALSE	0	0.0135413	0.0362	-0.307	0.00422309	0.0211	0.371	0.567786	0.773	0.0637	0.246	-0.00105	0.0626	-0.308	TRUE	TRUE	FALSE	TRUE
Q9ERR1	Ndel1	8.15499	8.16524	7.92313	7.99279	7.75148	7.74788	7.9508	7.94145	7.62183	7.73786	7.62017	7.51172	7.91602	7.65471	7.97486	8.05538	FALSE	0	0.000179033	0.00118	-0.436	0.00637598	0.0288	0.277	0.0882192	0.279	-0.159	-0.00962	0.202	0.0427	-0.235	TRUE	TRUE	FALSE	TRUE
Q9EQS9	Igdcc4	6.77723	6.66491	6.81103	6.57747	6.32173	6.92601	6.37565	6.6051	7.02211	7.09478	7.17115	7.10588	6.68081	6.6238	6.77409	6.30539	FALSE	0	0.00586545	0.0185	0.391	0.000934085	0.00649	-0.502	0.370193	0.617	-0.112	-0.183	-0.0322	-0.144	0.359	TRUE	TRUE	FALSE	TRUE
Q9EQN3	Tsc22d4	8.71996	8.27649	8.61967	8.54511	8.7237	8.4884	8.64565	8.33437	8.97971	9.02459	8.95109	9.06144	8.49851	8.82092	8.5179	8.65553	FALSE	0	0.00039699	0.00216	0.464	0.00198201	0.0116	-0.381	0.423889	0.659	0.0829	-0.131	-0.139	-0.0557	0.325	TRUE	TRUE	FALSE	TRUE
Q9EQM6	Dgcr8	8.15716	8.10552	7.84025	8.07118	8.06174	7.81708	8.04309	8.15537	7.71772	7.73484	7.61486	7.72984	8.08316	7.93185	8.10009	7.88195	FALSE	0	0.000709871	0.00341	-0.344	0.00211028	0.0122	0.3	0.588379	0.787	-0.0443	0.079	0.103	0.0589	-0.241	TRUE	TRUE	FALSE	TRUE
Q9EQK5	Mvp	9.27766	9.27795	9.12644	9.28352	9.21736	9.08705	9.355	9.27248	10.3987	10.4619	10.1947	10.2883	9.37631	9.54046	9.51092	9.50081	FALSE	0	1.53e-10	2.78e-08	1.09	4.13e-09	5.97e-07	-0.854	0.00300716	0.0456	0.241	-0.34	-0.332	-0.091	0.763	TRUE	TRUE	FALSE	TRUE
Q9EQH2	Erap1	7.70537	7.68357	7.6469	7.74716	7.66639	7.8735	7.84265	7.86463	8.20898	8.21124	8.16387	8.17824	7.78788	7.80674	7.76918	7.7484	FALSE	0	1.44e-08	7.53e-07	0.495	1.43e-07	8.18e-06	-0.413	0.0759609	0.257	0.0823	-0.0573	-0.173	-0.091	0.322	TRUE	TRUE	FALSE	TRUE
Q9EQ06	Hsd17b11	8.44575	8.48583	8.39394	8.40208	8.45028	8.42847	8.42037	8.49931	8.8417	8.88439	8.80087	8.81096	8.46093	8.60216	8.54675	8.56539	FALSE	0	3.07e-08	1.35e-06	0.403	1.64e-06	5.04e-05	-0.291	0.00916676	0.0808	0.112	-0.115	-0.133	-0.0211	0.27	TRUE	TRUE	FALSE	TRUE
Q9EPQ7	Stard5	8.09217	8.18382	8.24504	8.23639	8.36857	8.19484	8.42284	8.32855	8.55495	8.56369	8.55269	8.60087	8.30821	8.37327	8.22471	8.19013	FALSE	0	4.89e-06	6.86e-05	0.379	7.18e-05	0.000898	-0.294	0.133115	0.351	0.0847	-0.0113	-0.151	-0.066	0.228	TRUE	TRUE	FALSE	TRUE
Q9EPL9	Acox3	7.737	7.76399	8.03568	7.94649	7.88713	7.99692	7.94757	7.71918	8.23362	8.18159	7.89587	8.26938	7.87095	7.71414	7.6782	7.64938	FALSE	0	0.00954298	0.0273	0.274	0.000440269	0.00361	-0.417	0.141415	0.362	-0.143	-0.0202	-0.0372	-0.18	0.237	TRUE	TRUE	FALSE	TRUE
Q9EPK2	Rp2	9.05283	9.1985	9.41556	9.33797	9.25978	9.02407	9.1012	9.21771	9.52991	9.59859	9.54924	9.47168	9.3518	9.21482	9.22496	8.95524	FALSE	0	0.00563167	0.0178	0.286	0.00130479	0.00835	-0.351	0.474316	0.705	-0.0645	-0.131	-0.0303	-0.0948	0.256	TRUE	TRUE	FALSE	TRUE
Q9EPB4	Pycard	7.81847	7.78811	7.68121	7.805	7.70399	7.94125	8.10773	7.8014	8.9416	8.93084	8.77425	8.96443	7.98492	7.97377	7.93504	8.24009	FALSE	0	1.94e-09	1.66e-07	1.13	5.68e-08	4.16e-06	-0.869	0.0078449	0.074	0.26	-0.261	-0.376	-0.116	0.753	TRUE	TRUE	FALSE	TRUE
Q9DCU2	Pllp	11.6132	11.8185	11.9177	11.8491	11.9115	11.7946	11.7338	11.6747	12.2046	12.2024	12.2673	12.2657	11.9979	11.9084	11.7676	11.8069	FALSE	0	1.75e-05	0.000182	0.435	0.000106276	0.00121	-0.365	0.321134	0.569	0.0706	-0.142	-0.121	-0.0507	0.314	TRUE	TRUE	FALSE	TRUE
Q9DCP2	Slc38a3	9.50011	9.64069	9.21022	9.47163	9.19605	9.56497	9.70757	9.46122	9.97871	9.91502	10.1071	10.1208	9.6273	9.35256	9.66336	9.34092	FALSE	0	0.000184395	0.00121	0.575	0.000358202	0.00307	-0.534	0.729885	0.871	0.0404	-0.134	-0.16	-0.12	0.414	TRUE	TRUE	FALSE	TRUE
Q9DCM2	Gstk1	9.26195	9.25269	9.31966	9.23105	9.25826	9.19555	9.35735	9.30485	9.7191	9.75168	9.7364	9.72285	9.26073	9.40854	9.1955	9.33425	FALSE	0	6.91e-08	2.64e-06	0.466	1.74e-07	9.58e-06	-0.433	0.477581	0.707	0.0334	-0.115	-0.128	-0.0946	0.338	TRUE	TRUE	FALSE	TRUE
Q9DCK3	Tspan4	6.69571	7.9063	8.155	7.7175	8.0315	7.1116	7.41166	7.40509	8.77742	9.04777	8.71196	9.03094	8.02254	7.64226	7.61759	7.93238	FALSE	0	0.000229529	0.00142	1.27	0.000899369	0.00629	-1.09	0.48824	0.714	0.185	-0.461	-0.332	-0.147	0.941	TRUE	TRUE	FALSE	TRUE
Q9DCJ9	Npl	6.95392	7.00524	7.23222	6.93052	7.24134	7.3792	7.17885	7.27274	7.54649	7.63944	7.66848	7.65662	7.07619	6.98546	6.80082	7.06239	FALSE	0	9.8e-07	1.95e-05	0.597	3.8e-07	1.71e-05	-0.647	0.510388	0.73	-0.0493	0.0412	-0.196	-0.246	0.401	TRUE	TRUE	FALSE	TRUE
Q9DC11	Plxdc2	8.43426	8.11929	8.41022	8.41399	8.38937	8.33636	8.55946	8.51381	8.69269	8.87106	8.76664	8.73169	8.28235	8.28169	8.25432	8.33553	FALSE	0	2.81e-05	0.000265	0.421	7.35e-06	0.000161	-0.477	0.433723	0.667	-0.056	-0.0123	-0.118	-0.174	0.303	TRUE	TRUE	FALSE	TRUE
Q9DBZ9	Syde1	5.94875	5.94461	5.90187	5.8199	5.90465	5.60795	6.24365	6.29711	6.76911	6.74256	6.60438	6.48461	5.49163	5.62788	5.53031	5.71153	FALSE	0	2.44e-05	0.000238	0.746	4.58e-07	1.97e-05	-1.06	0.0216505	0.126	-0.313	-0.0261	-0.136	-0.449	0.611	TRUE	TRUE	FALSE	TRUE
Q9DBG5	Plin3	9.10482	8.96595	8.8397	9.09698	8.77547	8.94283	8.93808	8.91098	9.46479	9.42025	9.39109	9.33608	9.03957	9.19377	9.22907	9.04857	FALSE	0	2.19e-05	0.000218	0.401	0.000776898	0.00563	-0.275	0.0715639	0.249	0.126	-0.214	-0.104	0.0216	0.297	TRUE	TRUE	FALSE	TRUE
Q9DBF1	Aldh7a1	11.7582	11.8113	11.8005	11.8442	11.7326	11.7126	11.6167	11.7389	12.063	12.1459	12.0679	12.1637	11.7335	11.8447	11.8128	11.7758	FALSE	0	1.63e-06	2.89e-05	0.307	1.05e-06	3.51e-05	-0.318	0.766317	0.892	-0.0118	-0.151	-0.0479	-0.0597	0.259	TRUE	TRUE	FALSE	TRUE
Q9DBB5	Eif4e3	6.48893	6.88484	6.73615	6.6896	7.36524	6.68941	7.097	7.41941	7.40054	7.70304	7.56863	7.47227	7.01697	7.15796	7.09031	7.00113	FALSE	0	1.83e-05	0.000187	0.836	0.00318826	0.0169	-0.47	0.0149636	0.103	0.367	0.0314	-0.411	-0.0447	0.425	TRUE	TRUE	FALSE	TRUE
Q9DB70	Fundc1	10.4974	10.0564	10.2637	10.4154	10.3987	10.805	10.4573	10.2945	10.0544	10.0318	10.02	9.91581	10.1711	10.2772	10.3572	10.4956	FALSE	0	0.0154606	0.0403	-0.303	0.0113726	0.045	0.32	0.878777	0.955	0.0171	0.207	0.0262	0.0433	-0.276	TRUE	TRUE	FALSE	TRUE
Q9DB29	Iah1	8.68339	8.58973	8.67092	8.82371	8.61387	8.78354	8.66329	8.6492	8.97906	9.05473	8.97774	8.97536	8.59535	8.72912	8.72702	8.74873	FALSE	0	4.65e-05	0.000393	0.305	6.11e-05	0.000783	-0.297	0.880002	0.955	0.00811	-0.0891	-0.0746	-0.0665	0.23	TRUE	TRUE	FALSE	TRUE
Q9DB26	Phyhd1	7.32251	7.20724	7.20594	7.12508	7.27053	7.27005	7.38015	7.23258	8.40789	8.37372	8.38641	8.29205	7.19669	7.51312	7.23743	7.5218	FALSE	0	1.85e-10	3e-08	1.15	1.23e-09	2.56e-07	-0.998	0.0522563	0.209	0.152	-0.271	-0.344	-0.192	0.806	TRUE	TRUE	FALSE	TRUE
Q9DB25	Alg5	7.75465	8.09057	7.54135	6.93767	7.65194	7.58744	7.58821	7.85036	6.47967	7.00533	6.73832	7.13985	7.52427	7.1982	7.90071	7.34105	TRUE	7	0.00385805	0.0132	-0.74	0.0089127	0.0373	0.65	0.68118	0.847	-0.09	0.274	0.185	0.0955	-0.555	TRUE	TRUE	FALSE	TRUE
Q9DAW9	Cnn3	9.32916	9.4005	9.27907	9.30808	9.15695	9.2626	9.2206	9.32649	10.3725	10.3619	10.3126	10.4259	9.28586	9.29499	9.40867	9.51525	FALSE	0	1.23e-11	6.39e-09	1.04	2.31e-11	1.68e-08	-0.992	0.390835	0.634	0.047	-0.337	-0.25	-0.203	0.789	TRUE	TRUE	FALSE	TRUE
Q9DAS9	Gng12	12.4093	12.3455	12.4972	12.5014	12.4671	12.4794	12.4008	12.2281	12.6895	12.6879	12.8253	12.69	12.44	12.5012	12.3864	12.4276	FALSE	0	0.000197139	0.00127	0.285	0.000199929	0.00197	-0.284	0.994106	0.997	0.00043	-0.105	-0.0602	-0.0598	0.225	TRUE	TRUE	FALSE	TRUE
Q9D975	Srxn1	5.51919	5.74131	5.51461	6.13056	5.72636	6.28399	6.39435	6.17908	6.35846	6.49332	6.36114	6.30805	6.01432	6.05554	5.79194	5.69498	FALSE	0	0.000631048	0.00311	0.654	0.00541871	0.0256	-0.491	0.295114	0.543	0.163	0.11	-0.309	-0.146	0.345	TRUE	TRUE	FALSE	TRUE
Q9D8Y7	Tnfaip8l2	6.15991	6.20682	6.5356	5.99852	6.23101	6.21577	6.33612	6.32058	7.02989	7.14962	6.31987	6.96375	6.12885	5.95276	5.92259	6.41569	TRUE	5	0.00145705	0.00608	0.641	0.000346399	0.00299	-0.761	0.471677	0.703	-0.12	-0.0921	-0.143	-0.263	0.498	TRUE	TRUE	FALSE	TRUE
Q9D8T2	Gsdmd	7.47512	7.6457	7.5283	7.40646	7.47621	7.1863	7.47863	7.70031	8.09271	8.20712	8.11763	8.2057	7.4902	7.64535	7.30619	7.64857	TRUE	8	1.15e-05	0.000131	0.642	1.34e-05	0.000252	-0.633	0.930207	0.976	0.00868	-0.203	-0.149	-0.141	0.493	TRUE	TRUE	FALSE	TRUE
Q9D8C4	Ifi35	7.40431	6.85219	7.08272	6.91364	6.89368	7.17547	7.19109	7.29896	7.91158	7.89876	8.09143	7.98766	7.29794	7.49165	7.24486	7.24239	FALSE	0	1.06e-06	2.06e-05	0.909	4.13e-05	0.000585	-0.653	0.0379511	0.172	0.256	-0.234	-0.31	-0.0544	0.599	TRUE	TRUE	FALSE	TRUE
Q9D7X8	Ggct	9.78659	10.0485	9.46467	9.79643	9.4872	9.53191	9.29829	9.63586	9.21434	9.32035	9.21709	9.06081	9.35535	9.45641	9.70059	9.60091	FALSE	0	0.000149844	0.00103	-0.571	0.0111143	0.0442	0.325	0.0444102	0.19	-0.246	-0.0101	0.276	0.0299	-0.295	TRUE	TRUE	FALSE	TRUE
Q9D7X1	Kctd4	9.29603	9.34647	9.3259	9.36248	9.40782	9.29136	9.45897	9.34757	8.76884	8.70009	8.95162	8.85695	9.21042	9.24256	9.14136	9.26985	FALSE	0	1.14e-07	3.91e-06	-0.513	2.51e-06	7.02e-05	0.397	0.0431529	0.187	-0.117	0.19	0.147	0.0299	-0.367	TRUE	TRUE	FALSE	TRUE
Q9D7V2	Lysmd2	9.67272	9.67928	9.44266	9.61984	9.42335	9.58468	9.57481	9.59937	9.39791	9.21324	9.3324	9.25739	9.60401	9.55027	9.76289	9.55883	FALSE	0	0.000374124	0.00207	-0.303	0.000239599	0.00225	0.319	0.81748	0.92	0.0154	0.0284	0.0865	0.102	-0.217	TRUE	TRUE	FALSE	TRUE
Q9D7A6	Srp19	8.9359	8.57173	8.3785	8.60406	8.41583	8.53387	8.56704	8.41108	8.331	8.25216	8.15591	8.17518	8.26821	8.54527	8.68551	8.69602	FALSE	0	0.00269826	0.0099	-0.394	0.0104722	0.042	0.32	0.507617	0.729	-0.0738	0.0115	0.152	0.0783	-0.242	TRUE	TRUE	FALSE	TRUE
Q9D6M3	Slc25a22	12.7428	12.976	12.2988	12.4709	12.458	12.5472	12.4532	12.6338	11.8601	11.7893	11.9845	12.0075	12.2393	12.1213	12.419	12.2894	FALSE	0	2.52e-05	0.000244	-0.712	0.00821061	0.0349	0.357	0.00850651	0.0778	-0.355	0.192	0.291	-0.0634	-0.42	TRUE	TRUE	FALSE	TRUE
Q9D281	Fam114a1	6.92283	6.63969	6.93577	6.45437	6.66394	6.67609	6.73081	6.73507	7.25338	7.15085	7.28442	7.13463	6.77038	6.89606	6.70418	6.72856	FALSE	0	0.000110025	0.000795	0.468	0.000237352	0.00224	-0.431	0.684626	0.849	0.0366	-0.154	-0.117	-0.0803	0.351	TRUE	TRUE	FALSE	TRUE
Q9D1M0	Sec13	9.63857	9.69392	9.68556	9.75991	9.26456	9.39197	9.35609	9.45122	9.56922	9.34824	9.32866	9.34769	9.70016	9.64152	9.86641	9.76423	FALSE	0	0.000275481	0.00163	-0.296	6.46e-05	0.00082	0.345	0.443762	0.676	0.0486	-0.185	0.144	0.193	-0.152	TRUE	TRUE	FALSE	TRUE
Q9D1J1	Necap2	8.15422	8.29781	8.10689	7.96693	8.03816	7.97062	8.33046	8.20974	8.73402	8.67066	8.31834	8.65193	8.09191	8.08053	8.13949	8.14015	FALSE	0	0.000258877	0.00156	0.462	0.000180364	0.00183	-0.481	0.849848	0.939	-0.0184	-0.107	-0.112	-0.131	0.35	TRUE	TRUE	FALSE	TRUE
Q9D173	Tomm7	8.91231	8.53842	8.64991	9.05188	9.25653	9.25035	9.40575	9.03083	8.33207	7.93671	8.45641	8.38059	8.72485	8.94069	8.79871	8.69294	FALSE	0	0.00117097	0.0051	-0.512	0.0011499	0.00754	0.513	0.992763	0.997	0.00117	0.463	0.0157	0.0169	-0.496	TRUE	TRUE	FALSE	TRUE
Q9D114	Hddc3	8.12251	8.13224	8.35847	8.08178	8.29403	8.3347	8.33718	8.37612	9.5695	9.86517	8.75289	9.2052	8.20036	8.37382	8.35802	8.23572	FALSE	0	5.28e-06	7.21e-05	1.17	1.69e-05	0.000297	-1.06	0.487932	0.714	0.118	-0.202	-0.364	-0.245	0.811	TRUE	TRUE	FALSE	TRUE
Q9D0L7	Armc10	10.1548	9.93266	9.99554	10.1006	9.79974	9.91857	9.74322	9.87846	9.69925	9.37565	9.7218	9.65236	9.81119	9.88679	9.94545	9.86126	FALSE	0	3.4e-05	0.000308	-0.434	0.00273573	0.015	0.264	0.0351565	0.164	-0.17	-0.00734	0.204	0.0338	-0.23	TRUE	TRUE	FALSE	TRUE
Q9D035	Nkain1	6.59373	6.62954	6.36658	7.26062	6.61347	6.44303	6.65692	6.73118	7.19209	7.55061	7.29671	6.983	6.61572	6.87635	6.97847	6.26792	TRUE	3	0.0108427	0.0303	0.543	0.0080259	0.0344	-0.571	0.881953	0.956	-0.028	-0.205	-0.103	-0.131	0.44	TRUE	TRUE	FALSE	TRUE
Q9CZJ0	Mpped2	8.34247	8.38601	8.28398	8.25245	8.06067	8.24021	8.11321	8.31122	7.86318	7.82951	7.8088	7.86319	8.25121	8.09374	8.26202	8.19357	FALSE	0	4.97e-07	1.17e-05	-0.475	1.23e-05	0.000238	0.359	0.0523553	0.209	-0.116	0.0466	0.182	0.0654	-0.294	TRUE	TRUE	FALSE	TRUE
Q9CYS6		9.02861	9.03577	9.03265	9.05997	9.18567	9.17278	8.97812	8.9701	9.4533	9.49014	9.52034	9.48848	8.91371	9.01647	8.98553	9.05096	FALSE	0	3.08e-07	8.23e-06	0.449	8.9e-08	5.72e-06	-0.496	0.355164	0.6	-0.0476	-0.0722	-0.11	-0.157	0.339	TRUE	TRUE	FALSE	TRUE
Q9CYL5	Glipr2	7.35461	7.7112	7.26674	7.41001	7.42486	7.35201	7.22414	7.53734	8.80808	8.83609	8.87818	9.13163	7.39066	7.59885	7.50113	7.55058	FALSE	0	3.84e-10	5.29e-08	1.48	7.66e-10	1.99e-07	-1.4	0.455866	0.69	0.0747	-0.426	-0.375	-0.301	1.1	TRUE	TRUE	FALSE	TRUE
Q9CWZ7	Napg	12.1559	12.3394	12.1373	12.4423	12.1441	12.2698	12.1427	12.2333	12.0049	11.9656	11.9714	12.0213	12.243	12.2081	12.3919	12.2642	FALSE	0	0.000612182	0.00303	-0.278	0.00047854	0.00384	0.286	0.900255	0.962	0.00809	0.014	0.0853	0.0934	-0.193	TRUE	TRUE	FALSE	TRUE
Q9CWS0	Ddah1	12.2215	12.4342	12.5082	12.4604	12.4867	12.3988	12.4386	12.4015	12.7394	12.8287	12.734	12.7041	12.4167	12.3016	12.3393	12.3524	FALSE	0	1.72e-05	0.000179	0.345	3.49e-06	9.16e-05	-0.399	0.340869	0.59	-0.0536	-0.054	-0.0793	-0.133	0.266	TRUE	TRUE	FALSE	TRUE
Q9CS42	Prps2	9.53084	9.46355	9.50595	9.42456	9.56769	9.29429	9.60399	9.29327	9.90389	9.90237	10.0398	9.79824	9.52602	9.57246	9.55587	9.52867	FALSE	0	2.43e-05	0.000238	0.43	0.000125063	0.00139	-0.365	0.371649	0.618	0.0645	-0.155	-0.113	-0.0487	0.317	TRUE	TRUE	FALSE	TRUE
Q9CRA4	Msmo1	7.15627	7.29302	6.87372	6.7822	6.99595	6.78743	7.08751	7.18096	6.4088	6.38465	6.23308	6.27499	6.56957	6.71361	6.87441	6.95897	FALSE	0	2.97e-05	0.000278	-0.701	0.0015635	0.00966	0.454	0.0515478	0.207	-0.247	0.227	0.24	-0.00681	-0.461	TRUE	TRUE	FALSE	TRUE
Q9CR86	Carhsp1	9.08665	9.47175	9.41785	9.23316	9.51636	9.18345	9.49161	9.73662	9.79901	9.97372	9.71596	9.88004	9.17279	9.28563	8.92883	8.98693	FALSE	0	0.000369236	0.00205	0.54	1.47e-05	0.00027	-0.749	0.0937254	0.287	-0.209	0.052	-0.128	-0.336	0.412	TRUE	TRUE	FALSE	TRUE
Q9CQY2	Ramac	7.63494	7.85027	7.87477	7.98697	7.90645	7.66027	7.7802	7.65219	7.76092	7.54943	7.37176	7.44797	7.72789	7.76265	7.81646	7.88334	FALSE	0	0.00399067	0.0135	-0.304	0.00963719	0.0394	0.265	0.665305	0.838	-0.0392	0.0206	0.108	0.0684	-0.197	TRUE	TRUE	FALSE	TRUE
Q9CQW9	Ifitm3	6.71828	6.9545	6.75347	6.62585	6.72072	6.76143	7.01747	7.08745	7.39294	7.5284	7.48548	7.45786	7.07181	6.75371	6.83688	6.69283	FALSE	0	3.94e-06	5.85e-05	0.703	1.39e-05	0.000259	-0.627	0.446864	0.68	0.0758	-0.0944	-0.228	-0.152	0.475	TRUE	TRUE	FALSE	TRUE
Q9CQP3	Chchd5	6.99013	6.99133	6.91523	7.14576	6.88075	6.77953	7.05566	7.07126	7.40175	7.44701	7.17295	7.07995	6.98805	7.05683	6.84734	7.01287	FALSE	0	0.00961324	0.0275	0.265	0.00443197	0.0219	-0.299	0.703754	0.857	-0.0343	-0.105	-0.0417	-0.076	0.223	TRUE	TRUE	FALSE	TRUE
Q9CQN7	Mrpl41	8.8641	8.81221	8.68351	8.79192	8.57036	8.77539	8.6528	8.87447	8.19372	8.55163	8.52017	8.17166	8.655	8.67302	8.72443	8.69189	FALSE	0	0.000217517	0.00137	-0.429	0.0021001	0.0122	0.327	0.261223	0.511	-0.102	0.0804	0.15	0.0482	-0.279	TRUE	TRUE	FALSE	TRUE
Q9CQE5	Rgs10	8.53502	8.43139	8.48015	8.41915	8.58185	8.4744	8.5361	8.41911	9.15712	9.1748	9.15723	9.05611	8.5869	8.55873	8.65831	8.71024	FALSE	0	7.76e-10	8.8e-08	0.67	2.87e-08	2.45e-06	-0.508	0.00360718	0.0491	0.162	-0.181	-0.217	-0.055	0.453	TRUE	TRUE	FALSE	TRUE
Q9CQ62	Decr1	9.56477	9.55661	9.50449	9.46443	9.62486	9.4835	9.57779	9.56185	10.1216	10.1589	10.0494	10.0917	9.41658	9.61719	9.51293	9.53756	FALSE	0	3.69e-09	2.91e-07	0.583	3.56e-09	5.51e-07	-0.584	0.974016	0.991	-0.00151	-0.116	-0.155	-0.157	0.428	TRUE	TRUE	FALSE	TRUE
Q9CPZ8	Cmc1	9.18321	9.30285	9.2545	9.41472	9.23697	9.25395	9.15687	9.27499	9.62083	9.63229	9.61582	9.6669	9.25306	9.35151	9.32986	9.257	FALSE	0	2.83e-06	4.47e-05	0.345	3.83e-06	9.88e-05	-0.336	0.847621	0.938	0.00904	-0.132	-0.074	-0.065	0.271	TRUE	TRUE	FALSE	TRUE
Q9CPY7	Lap3	11.0128	11.3088	11.1567	11.2539	11.1125	11.1701	11.0003	11.0741	11.7807	11.8447	11.7475	11.793	11.2342	11.1538	11.2644	11.203	FALSE	0	3.85e-08	1.57e-06	0.608	7.4e-08	4.95e-06	-0.578	0.597649	0.793	0.0308	-0.23	-0.136	-0.106	0.472	TRUE	TRUE	FALSE	TRUE
Q9CPV9	P2ry12	7.07062	7.2541	6.85439	6.92545	7.04995	6.62535	6.5956	7.0117	6.24898	6.43286	6.1588	6.03206	6.56223	6.498	6.92274	6.79124	FALSE	0	2.45e-05	0.000238	-0.808	0.00278213	0.0152	0.475	0.0239771	0.133	-0.333	0.131	0.337	0.00392	-0.471	TRUE	TRUE	FALSE	TRUE
Q9CPU0	Glo1	12.4789	12.6894	12.5749	12.4154	12.5462	12.5222	12.5293	12.6631	12.9662	13.1439	13.0725	12.875	12.6311	12.6253	12.6734	12.9294	FALSE	0	2.99e-05	0.000279	0.475	0.00190683	0.0113	-0.3	0.0429939	0.187	0.175	-0.143	-0.169	0.00628	0.306	TRUE	TRUE	FALSE	TRUE
Q9BDB7	Ifi44l	7.70984	7.74176	7.72324	7.81488	7.72254	7.71848	7.82058	7.7887	7.32621	6.91225	6.83303	6.83881	7.52921	7.49397	7.63326	7.49839	TRUE	12	3.22e-07	8.55e-06	-0.77	1.24e-05	0.000238	0.561	0.0286882	0.146	-0.209	0.256	0.241	0.0321	-0.529	TRUE	TRUE	FALSE	TRUE
Q99PU5	Acsbg1	10.7143	10.6215	10.65	10.5946	10.6161	10.6426	10.5947	10.613	10.9624	10.9514	10.9402	10.9672	10.5661	10.5509	10.6027	10.6628	FALSE	0	2.22e-07	6.34e-06	0.31	3.49e-08	2.85e-06	-0.36	0.161341	0.392	-0.0495	-0.0865	-0.0581	-0.108	0.252	TRUE	TRUE	FALSE	TRUE
Q99PL5	Rrbp1	9.76746	9.68355	9.49571	9.63157	9.34521	9.55789	9.68277	9.72706	10.0493	10.0816	10.0281	10.1199	9.68512	9.77079	9.73321	9.68723	FALSE	0	4.36e-05	0.000376	0.425	0.000279965	0.00255	-0.351	0.325631	0.574	0.0745	-0.175	-0.108	-0.0338	0.317	TRUE	TRUE	FALSE	TRUE
Q99PJ0	Ntm	12.5	12.3452	12.3299	12.3994	12.1273	12.4604	11.9704	12.3505	12.0819	11.9092	12.1342	12.1124	12.2722	12.2932	12.5177	12.3502	FALSE	0	0.00299425	0.0107	-0.334	0.00636469	0.0288	0.299	0.711312	0.861	-0.0353	-0.0325	0.134	0.0987	-0.2	TRUE	TRUE	FALSE	TRUE
Q99P91	Gpnmb	5.98572	6.16724	6.35398	6.88447	6.31	6.44547	5.71343	4.55299	7.83376	7.81949	7.64712	7.70295	6.35007	6.84655	7.07485	6.82565	FALSE	0	0.000711608	0.00342	1.4	0.00953246	0.0392	-0.977	0.21156	0.457	0.426	-0.902	-0.309	0.117	1.09	TRUE	TRUE	FALSE	TRUE
Q99P30	Nudt7	8.38622	7.90853	7.94345	7.71041	7.82426	7.79294	8.55855	8.20082	8.55804	8.82058	8.65844	8.60127	8.07058	8.25197	7.92079	8.24461	FALSE	0	0.00108485	0.0048	0.672	0.00553276	0.026	-0.538	0.42581	0.661	0.135	-0.122	-0.229	-0.0937	0.444	TRUE	TRUE	FALSE	TRUE
Q99NH8	Trem2	4.35902	3.90797	4.2026	4.05693	4.15914	4.17276	4.31343	4.05009	5.52029	5.14495	5.40928	5.309	3.751	4.55569	4.42738	4.63909	TRUE	9	2.48e-06	4.02e-05	1.21	2.06e-05	0.00035	-1	0.208475	0.454	0.212	-0.325	-0.367	-0.155	0.847	TRUE	TRUE	FALSE	TRUE
Q99NH2	Pard3	7.40228	7.23019	7.54454	7.43163	7.44144	7.48792	7.21339	7.46724	7.72292	7.88837	7.67771	7.7673	7.1995	7.50462	7.24178	7.37628	FALSE	0	0.000661795	0.00323	0.362	0.000130176	0.00143	-0.434	0.404505	0.645	-0.0716	-0.0723	-0.0727	-0.144	0.289	TRUE	TRUE	FALSE	TRUE
Q99NE5	Rims1	11.1023	11.0757	11.0547	11.1547	11.0754	11.1074	11.0047	11.0217	10.7191	10.6456	10.7205	10.679	11.0136	11.0038	11.0971	11.0905	FALSE	0	2.51e-08	1.14e-06	-0.406	1.12e-07	6.86e-06	0.36	0.235575	0.483	-0.0456	0.0794	0.124	0.0784	-0.282	TRUE	TRUE	FALSE	TRUE
Q99NB1	Acss1	9.0707	9.00174	9.04098	9.02762	9.04226	8.97445	9.0443	9.11225	9.35287	9.46938	9.33059	9.25111	8.98109	9.01293	8.9595	9.02431	FALSE	0	4.07e-06	5.99e-05	0.316	9.97e-07	3.43e-05	-0.357	0.365165	0.611	-0.0408	-0.0627	-0.0707	-0.112	0.245	TRUE	TRUE	FALSE	TRUE
Q99MR3	Slc12a9	9.61649	9.64109	9.53919	9.68384	9.54769	9.66015	9.57772	9.57497	10.0332	9.93807	9.98338	10.0457	9.61306	9.62678	9.72029	9.58904	FALSE	0	3.05e-07	8.18e-06	0.38	5.33e-07	2.15e-05	-0.363	0.690093	0.852	0.0171	-0.122	-0.0918	-0.0746	0.288	TRUE	TRUE	FALSE	TRUE
Q99M28	Rnps1	8.25998	8.29317	8.28057	8.64259	8.43138	8.35343	8.53747	8.19079	8.0198	7.8188	8.26948	8.03588	8.40107	8.53243	8.39578	8.42107	FALSE	0	0.00553201	0.0176	-0.333	0.00145045	0.00913	0.402	0.512115	0.732	0.0685	0.073	0.0638	0.132	-0.269	TRUE	TRUE	FALSE	TRUE
Q99LJ0	Cttnbp2nl	6.80086	6.9639	6.86914	6.54401	6.6422	6.78287	6.80538	6.88032	7.04812	7.00073	7.16075	7.05538	6.86438	6.72846	6.70505	6.89164	FALSE	0	0.00436307	0.0145	0.272	0.00469064	0.0229	-0.269	0.9716	0.99	0.00291	-0.0813	-0.0645	-0.0616	0.207	TRUE	TRUE	FALSE	TRUE
Q99LD8	Ddah2	11.0303	11.0768	11.1129	11.1083	11.0229	11.1185	10.9702	11.0295	11.5321	11.5803	11.5842	11.5756	11.2399	11.1657	11.1928	11.2297	FALSE	0	1.53e-09	1.44e-07	0.486	7.04e-08	4.83e-06	-0.361	0.00337064	0.0479	0.125	-0.188	-0.141	-0.0161	0.345	TRUE	TRUE	FALSE	TRUE
Q99L88	Sntb1	8.37359	8.4874	8.25819	8.24941	8.12949	8.28044	8.36882	8.39797	8.5705	8.64086	8.56983	8.65138	8.31632	8.36036	8.2855	8.34681	FALSE	0	0.000642724	0.00315	0.266	0.000401616	0.00337	-0.281	0.810669	0.916	-0.0149	-0.0987	-0.0508	-0.0657	0.215	TRUE	TRUE	FALSE	TRUE
Q99L20	Gstt3	7.70304	7.63742	7.59438	7.42033	7.57546	7.54997	7.6246	7.88236	8.30227	8.41613	8.25768	8.1826	7.65249	7.88219	7.73978	7.73319	FALSE	0	4.92e-07	1.17e-05	0.701	1.04e-05	0.000208	-0.538	0.0628957	0.233	0.163	-0.164	-0.233	-0.0702	0.468	TRUE	TRUE	FALSE	TRUE
Q99L13	Hibadh	11.4254	11.5137	11.5488	11.573	11.439	11.473	11.4555	11.4256	11.7568	11.8755	11.7334	11.7684	11.5109	11.502	11.4467	11.5607	FALSE	0	1.17e-05	0.000132	0.268	7.82e-06	0.000168	-0.278	0.80767	0.916	-0.0101	-0.115	-0.0478	-0.0579	0.22	TRUE	TRUE	FALSE	TRUE
Q99L04	Dhrs1	10.4641	10.5112	10.5349	10.5263	10.3949	10.5685	10.476	10.3677	11.5254	11.6181	11.4857	11.6238	10.5263	10.4807	10.5289	10.4661	FALSE	0	1.35e-12	1.27e-09	1.05	1.2e-12	2.19e-09	-1.06	0.853272	0.941	-0.00863	-0.304	-0.247	-0.256	0.807	TRUE	TRUE	FALSE	TRUE
Q99KC8	Vwa5a	9.99022	9.92677	9.89452	9.88775	9.86927	9.8865	9.93485	9.96789	10.6493	10.57	10.6677	10.6106	10.0901	10.1174	10.2497	10.0786	FALSE	0	1.4e-10	2.73e-08	0.7	1.52e-08	1.53e-06	-0.49	0.000232428	0.0134	0.209	-0.235	-0.225	-0.0155	0.475	TRUE	TRUE	FALSE	TRUE
Q99K67	Aass	7.60612	7.52796	7.5574	7.534	7.46998	7.45546	7.61976	7.60199	8.12747	8.10074	8.07096	8.22162	7.63658	7.72288	7.69014	7.61753	FALSE	0	5.51e-09	3.89e-07	0.574	8.43e-08	5.52e-06	-0.463	0.0315386	0.154	0.11	-0.186	-0.166	-0.0558	0.408	TRUE	TRUE	FALSE	TRUE
Q99K24	Slc39a3	8.22056	7.94813	8.27035	8.05156	8.05796	8.09659	8.11814	8.07763	7.85567	7.76804	7.72788	7.41368	7.98499	8.08977	7.92515	7.92116	FALSE	0	0.000203042	0.0013	-0.431	0.00495961	0.0238	0.289	0.12347	0.336	-0.142	0.117	0.152	0.00981	-0.279	TRUE	TRUE	FALSE	TRUE
Q99JY0	Hadhb	10.8236	10.7902	10.789	10.7514	10.8302	10.7153	10.9412	10.8315	11.2605	11.2608	11.2082	11.2623	10.889	10.8428	10.8804	10.8578	FALSE	0	1.73e-08	8.67e-07	0.459	1.85e-07	1.01e-05	-0.38	0.0711262	0.248	0.079	-0.104	-0.145	-0.0659	0.315	TRUE	TRUE	FALSE	TRUE
Q99JW4	Lims1	7.53688	7.53956	7.55637	7.34718	7.58104	7.41163	7.39564	7.51103	7.86222	7.82423	7.8736	7.65694	7.5199	7.58001	7.5385	7.49765	FALSE	0	0.000136495	0.000948	0.309	0.000466984	0.00378	-0.27	0.524208	0.74	0.039	-0.102	-0.082	-0.043	0.227	TRUE	TRUE	FALSE	TRUE
Q99JP6	Homer3	9.61031	9.75261	9.60558	9.68965	9.40448	9.48975	9.59397	9.66003	9.1851	9.24965	9.02939	9.16701	9.54146	9.60995	9.61196	9.61081	FALSE	0	5.12e-07	1.2e-05	-0.507	3.01e-06	8.13e-05	0.436	0.245688	0.494	-0.071	0.0488	0.176	0.105	-0.33	TRUE	TRUE	FALSE	TRUE
Q99JG2	Gpr37l1	10.5433	10.4701	10.6545	10.3768	10.5903	10.4049	10.3572	10.4226	10.9659	10.8919	10.952	10.8465	10.4386	10.3812	10.4037	10.3521	FALSE	0	8.63e-06	0.000106	0.403	4.51e-07	1.95e-05	-0.52	0.0687632	0.244	-0.117	-0.122	-0.0546	-0.172	0.348	TRUE	TRUE	FALSE	TRUE
Q99JF5	Mvd	7.95962	7.70185	7.58455	7.91799	7.46034	7.88567	7.85245	7.73117	7.39267	7.15584	7.28887	7.19289	7.87094	7.72063	7.83465	7.79311	FALSE	0	7.89e-05	0.000605	-0.533	6.11e-05	0.000783	0.547	0.889063	0.958	0.0138	0.086	0.145	0.158	-0.389	TRUE	TRUE	FALSE	TRUE
Q99JB8	Pacsin3	7.37195	7.44185	7.56081	7.53151	7.55029	7.36448	7.2715	7.63986	7.80345	7.92953	7.68517	7.82458	7.30252	7.47967	7.66033	7.41736	FALSE	0	0.0019471	0.00762	0.334	0.00150146	0.0094	-0.346	0.897429	0.961	-0.0116	-0.0956	-0.0756	-0.0872	0.259	TRUE	TRUE	FALSE	TRUE
Q99J93	Ifitm2	5.81744	5.73887	5.71669	5.43168	5.51955	5.54431	5.76724	6.00261	6.58528	6.15689	6.33631	6.24993	5.9177	5.94395	5.79723	5.61555	TRUE	1	9.56e-05	0.000708	0.656	0.000865782	0.00612	-0.513	0.262777	0.512	0.142	-0.175	-0.208	-0.0652	0.448	TRUE	TRUE	FALSE	TRUE
Q99J85	Nptxr	12.0481	11.8228	11.7453	11.7963	11.6399	11.832	11.7142	11.9761	11.3727	11.4549	11.314	11.3667	11.6793	11.7638	11.847	11.7992	FALSE	0	1.7e-05	0.000178	-0.476	0.000112929	0.00127	0.395	0.298597	0.547	-0.0808	0.0923	0.155	0.0741	-0.321	TRUE	TRUE	FALSE	TRUE
Q925N0	Sfxn5	10.6708	10.6671	10.6385	10.7561	10.4674	10.6754	10.6563	10.6434	11.0499	10.9763	10.9098	11.074	10.6178	10.6858	10.7499	10.6829	FALSE	0	2.33e-05	0.00023	0.319	2.41e-05	0.000391	-0.318	0.984893	0.994	0.000997	-0.134	-0.062	-0.061	0.257	TRUE	TRUE	FALSE	TRUE
Q924Z4	Cers2	7.20777	7.5251	7.63676	7.30005	7.55765	7.33564	7.33556	7.59879	7.79708	8.0971	7.93108	7.8655	7.51713	7.53562	7.38974	7.6599	FALSE	0	0.000159077	0.00108	0.505	0.00128644	0.00826	-0.397	0.293734	0.542	0.108	-0.124	-0.163	-0.0551	0.342	TRUE	TRUE	FALSE	TRUE
Q923Z0	Gprc5b	7.76112	8.0532	8.07861	8.02228	7.97142	8.05238	8.05827	7.97795	8.44891	8.53676	8.54256	8.38719	8.0356	8.11373	8.17386	7.93421	FALSE	0	4.09e-06	6.01e-05	0.5	3.14e-05	0.000474	-0.415	0.235899	0.483	0.0855	-0.119	-0.155	-0.0699	0.345	TRUE	TRUE	FALSE	TRUE
Q923D2	Blvrb	9.02983	8.90425	8.81875	8.8778	8.71385	8.98924	9.05738	9.13132	9.3622	9.50116	9.27829	9.43117	9.11638	9.16101	9.08968	8.89561	FALSE	0	5.49e-05	0.000455	0.486	0.00180483	0.0108	-0.328	0.0855708	0.274	0.158	-0.112	-0.177	-0.0192	0.308	TRUE	TRUE	FALSE	TRUE
Q923B0	Ggact	8.83251	8.78879	8.96385	8.76751	8.87488	8.88617	8.89654	8.88805	9.53183	9.40504	9.4183	9.44154	8.99964	9.11138	9.00553	8.88691	FALSE	0	8.43e-09	5.28e-07	0.611	4.1e-07	1.81e-05	-0.448	0.00640799	0.0661	0.163	-0.157	-0.205	-0.0428	0.406	TRUE	TRUE	FALSE	TRUE
Q922J6	Tspan2	11.2756	11.4995	11.5082	11.5058	11.548	11.5429	11.324	11.7083	11.6888	11.8032	11.8488	11.6788	11.6004	11.46	11.4951	11.3605	FALSE	0	0.00170783	0.00687	0.308	0.00377192	0.0193	-0.276	0.696449	0.855	0.0317	-0.0222	-0.106	-0.074	0.202	TRUE	TRUE	FALSE	TRUE
Q921Z5	Tnfaip8	7.94095	7.65112	7.96178	7.99942	8.14073	8.04552	8.08923	7.73893	8.26034	8.14054	8.17845	8.1756	7.81815	8.01758	7.81185	7.87472	FALSE	0	0.00452914	0.015	0.3	0.00380794	0.0194	-0.308	0.932021	0.977	-0.00774	0.0133	-0.102	-0.11	0.198	TRUE	TRUE	FALSE	TRUE
Q921T2	Tor1aip1	7.67314	7.43771	7.61368	7.5015	7.845	7.95085	7.78664	8.23277	7.88315	7.84733	8.1204	7.7541	7.50892	7.45094	7.38173	7.5034	FALSE	0	0.00250289	0.00929	0.345	0.000345768	0.00299	-0.44	0.32795	0.576	-0.0953	0.236	-0.162	-0.257	0.183	TRUE	TRUE	FALSE	TRUE
Q921E2	Rab31	9.28399	9.37849	9.46758	9.46448	9.39243	9.51711	9.53061	9.6199	9.89745	9.90878	9.90662	9.91818	9.67567	9.52542	9.60572	9.46833	FALSE	0	2.79e-07	7.61e-06	0.509	2.86e-05	0.000442	-0.339	0.00877384	0.0791	0.17	-0.0825	-0.199	-0.0288	0.31	TRUE	TRUE	FALSE	TRUE
Q920P5	Ak5	9.6971	9.89811	9.78825	9.80585	9.84204	9.74372	9.8301	9.67845	9.29327	9.31025	9.25343	9.36356	9.64708	9.54005	9.67351	9.75888	FALSE	0	2.94e-07	7.95e-06	-0.492	1.5e-05	0.000274	0.35	0.020078	0.121	-0.142	0.141	0.165	0.0222	-0.328	TRUE	TRUE	FALSE	TRUE
Q920P3	Brinp1	8.97949	8.87067	8.93863	8.83251	9.00839	8.96889	8.93888	9.02039	8.45828	8.43354	8.50664	8.41955	8.76851	8.78761	8.84945	8.83338	FALSE	0	9.69e-09	5.77e-07	-0.451	1.96e-07	1.06e-05	0.355	0.0244844	0.134	-0.0956	0.196	0.117	0.0213	-0.334	TRUE	TRUE	FALSE	TRUE
Q920N7	Syt12	9.39841	9.435	9.4894	9.45234	9.49555	9.38063	9.41345	9.4877	8.93795	9.12154	8.85958	8.88745	9.47277	9.30184	9.47996	9.43216	FALSE	0	4.82e-07	1.15e-05	-0.492	8.36e-07	2.98e-05	0.47	0.702143	0.856	-0.0221	0.129	0.128	0.106	-0.364	TRUE	TRUE	FALSE	TRUE
Q920E5	Fdps	10.6514	10.6135	10.6759	10.627	10.6344	10.5859	10.6761	10.5621	10.1762	10.1065	10.2642	10.2029	10.6911	10.7194	10.6704	10.6894	FALSE	0	6.35e-09	4.35e-07	-0.455	1.59e-09	2.97e-07	0.505	0.193374	0.435	0.0506	0.0805	0.108	0.158	-0.347	TRUE	TRUE	FALSE	TRUE
Q91ZJ5	Ugp2	11.1328	11.2185	11.1069	11.0805	11.125	11.0923	11.1891	11.1664	11.577	11.6212	11.5426	11.529	11.1275	11.0953	11.1313	11.0753	FALSE	0	1.1e-08	6.13e-07	0.433	4.96e-09	6.55e-07	-0.46	0.469788	0.701	-0.0273	-0.095	-0.103	-0.131	0.329	TRUE	TRUE	FALSE	TRUE
Q91ZH7	Abhd3	6.49004	6.53396	6.88012	6.99567	7.04795	6.91995	7.10291	6.7088	7.16906	7.25453	7.19323	7.2805	6.89695	7.03796	6.75005	6.78056	FALSE	0	0.000532581	0.00272	0.499	0.00644295	0.029	-0.358	0.22749	0.476	0.141	0.00476	-0.215	-0.0738	0.284	TRUE	TRUE	FALSE	TRUE
Q91ZE0	Tmlhe	7.52001	7.47147	7.34301	7.27594	7.65642	7.5298	7.615	7.9026	7.88654	8.05382	7.68163	7.83546	7.17627	7.27988	7.44994	7.42729	FALSE	0	0.000225288	0.00141	0.462	5.86e-05	0.000762	-0.531	0.473778	0.704	-0.0693	0.107	-0.166	-0.236	0.295	TRUE	TRUE	FALSE	TRUE
Q91Z96	Bmp2k	7.91568	7.72752	7.26583	7.83908	7.37875	7.84904	7.7113	7.50804	8.3376	8.32485	8.24506	8.30423	7.74875	7.68362	8.03534	7.4941	FALSE	0	0.000604839	0.003	0.616	0.00127264	0.00819	-0.562	0.709062	0.86	0.0534	-0.224	-0.149	-0.0951	0.467	TRUE	TRUE	FALSE	TRUE
Q91YY5	Slco1a5	5.89194	5.70873	5.46304	5.34663	5.75038	5.85315	6.35426	6.04148	6.15814	6.53141	6.20815	6.18202	5.98502	5.97886	5.83735	5.6206	TRUE	3	0.000376807	0.00208	0.667	0.0120475	0.047	-0.414	0.100661	0.3	0.253	0.0679	-0.329	-0.0765	0.338	TRUE	TRUE	FALSE	TRUE
Q91YT8	Tmem63a	6.80812	7.45331	6.68078	7.43585	7.19035	6.94489	7.47892	7.36304	8.20987	8.20831	8.17418	7.82136	7.48588	7.40194	7.74554	7.36719	FALSE	0	4.84e-05	0.000408	1.01	0.00394251	0.02	-0.603	0.0363349	0.167	0.406	-0.241	-0.391	0.0145	0.618	TRUE	TRUE	FALSE	TRUE
Q91YE8	Synpo2	6.42115	5.88208	5.87675	5.88871	6.32044	6.27009	6.22153	6.25144	6.5814	6.7159	6.79605	6.61464	5.97079	6.3445	6.39466	6.28023	FALSE	0	5.04e-05	0.000422	0.66	0.00221688	0.0127	-0.429	0.0651183	0.238	0.23	-0.036	-0.285	-0.0544	0.375	TRUE	TRUE	FALSE	TRUE
Q91Y11	Pcdha9	7.83598	7.85535	7.96192	7.72584	7.89554	7.9755	8.01406	8.02945	7.56158	7.54305	7.52755	7.35907	7.88959	7.86094	7.75191	7.91453	FALSE	0	3.25e-05	0.000297	-0.347	2.45e-05	0.000395	0.356	0.872664	0.952	0.00947	0.185	0.0509	0.0604	-0.296	TRUE	TRUE	FALSE	TRUE
Q91XV3	Basp1	14.9827	15.0344	14.8289	15.0853	14.9282	14.9893	14.8702	14.8607	14.604	14.4781	14.7572	14.7276	14.8945	14.9386	15.266	15.4184	FALSE	0	0.00537738	0.0172	-0.341	0.00033651	0.00295	0.488	0.179946	0.415	0.147	-0.0044	0.0663	0.213	-0.275	TRUE	TRUE	FALSE	TRUE
Q91WU5	As3mt	9.33378	9.34324	9.33138	9.3956	9.3198	9.35044	9.22414	9.35269	9.70625	9.71165	9.66998	9.69764	9.25816	9.37345	9.43318	9.2568	FALSE	0	1.26e-06	2.36e-05	0.345	6.32e-07	2.43e-05	-0.366	0.639805	0.821	-0.0206	-0.111	-0.0714	-0.092	0.274	TRUE	TRUE	FALSE	TRUE
Q91WP6	Serpina3n	8.50779	8.12347	7.86871	7.93883	7.96073	8.33749	8.47653	8.57825	9.22886	9.06954	8.97255	9.12631	8.06987	7.96437	8.20888	8.2078	FALSE	0	5.47e-06	7.38e-05	0.99	5.66e-06	0.000132	-0.987	0.983098	0.993	0.00303	-0.0767	-0.305	-0.302	0.684	TRUE	TRUE	FALSE	TRUE
Q91WF7	Fig4	8.11476	7.80902	7.49168	7.45797	7.32289	7.60976	7.81877	7.7657	7.24132	6.86972	6.48985	7.06483	7.42593	7.72854	7.80945	7.39836	FALSE	0	0.000472907	0.00248	-0.802	0.00193331	0.0114	0.674	0.483422	0.712	-0.128	0.166	0.255	0.127	-0.547	TRUE	TRUE	FALSE	TRUE
Q91WC9	Daglb	8.40866	8.41561	8.47369	8.50299	8.47792	8.35843	8.41658	8.2446	8.78328	8.84693	8.91	8.81572	8.39874	8.48646	8.29018	8.33592	FALSE	0	3.94e-06	5.85e-05	0.389	5.36e-07	2.15e-05	-0.461	0.197491	0.439	-0.0724	-0.136	-0.0601	-0.133	0.329	TRUE	TRUE	FALSE	TRUE
Q91W92	Cdc42ep1	9.14918	9.32373	9.23429	9.54407	9.21429	9.34251	9.37359	9.22946	9.98111	9.83328	9.95422	9.92672	9.51968	9.65201	9.52542	9.38514	FALSE	0	1.46e-06	2.68e-05	0.611	0.000125249	0.00139	-0.403	0.0174644	0.113	0.208	-0.222	-0.199	0.00877	0.412	TRUE	TRUE	FALSE	TRUE
Q91W43	Gldc	9.27904	9.24364	9.36285	9.29193	9.27436	9.34155	9.39269	9.30693	9.60923	9.65035	9.56552	9.63954	9.3574	9.32495	9.2965	9.31979	FALSE	0	3.15e-07	8.39e-06	0.322	1.03e-06	3.49e-05	-0.292	0.41096	0.649	0.0303	-0.0621	-0.0967	-0.0664	0.225	TRUE	TRUE	FALSE	TRUE
Q91W40	Klc3	7.5166	7.38498	7.44014	7.24096	7.48075	7.43702	7.56812	7.47322	7.82632	7.67493	7.81642	7.67771	7.18493	7.38387	7.47779	7.4487	TRUE	4	0.000170875	0.00114	0.353	9.62e-05	0.00112	-0.375	0.759074	0.888	-0.0218	-0.0123	-0.106	-0.128	0.247	TRUE	TRUE	FALSE	TRUE
Q91VJ4	Stk38	7.03758	7.04967	6.96007	6.69262	7.0146	6.8491	6.84504	6.88518	7.26144	7.44334	7.45624	7.26853	6.72231	6.68275	6.34356	6.91441	FALSE	0	0.00137649	0.00582	0.422	1.35e-05	0.000253	-0.692	0.0239276	0.133	-0.269	-0.0657	-0.0292	-0.298	0.393	TRUE	TRUE	FALSE	TRUE
Q91VH1	Adipor1	7.64461	7.9012	7.79264	7.95399	7.57369	7.88612	7.64793	7.87678	8.43638	8.35545	8.33454	8.38244	7.72211	7.5679	7.70444	7.72585	FALSE	0	4.68e-06	6.65e-05	0.554	3.17e-07	1.49e-05	-0.697	0.0859407	0.275	-0.143	-0.16	-0.0835	-0.227	0.471	TRUE	TRUE	FALSE	TRUE
Q91VC7	Ppp1r14a	8.63143	8.70404	8.67296	8.79109	8.78634	8.98452	8.77055	8.6643	9.36751	9.35161	9.46193	9.22255	8.84121	9.06187	8.97232	8.93704	FALSE	0	1.89e-07	5.57e-06	0.651	4.99e-05	0.000683	-0.398	0.00259026	0.0428	0.253	-0.15	-0.251	0.00178	0.4	TRUE	TRUE	FALSE	TRUE
Q91VB2	Camk1g	8.06457	7.98404	7.87011	7.99562	8.09097	7.93947	8.22585	8.03463	7.48293	7.64287	7.542	7.58034	7.83628	7.98375	7.85068	7.88518	FALSE	0	7.35e-06	9.25e-05	-0.417	9.23e-05	0.00109	0.327	0.161504	0.392	-0.0896	0.197	0.103	0.0134	-0.314	TRUE	TRUE	FALSE	TRUE
Q91V76		10.151	10.1925	10.3063	10.2192	10.311	10.0538	10.1201	10.127	10.7847	10.8451	10.8265	10.7467	10.2337	10.4187	10.2356	10.3623	FALSE	0	8.44e-08	3.12e-06	0.583	7.45e-07	2.76e-05	-0.488	0.123834	0.336	0.0953	-0.218	-0.154	-0.0583	0.43	TRUE	TRUE	FALSE	TRUE
Q8VIM9	Irgq	9.42016	9.56792	9.50117	9.59431	9.56599	9.42914	9.45113	9.3328	9.1764	9.10106	9.14877	9.07005	9.37946	9.38794	9.41303	9.47433	FALSE	0	1.67e-06	2.94e-05	-0.397	5.2e-05	0.000698	0.29	0.0527914	0.21	-0.107	0.0689	0.145	0.0378	-0.252	TRUE	TRUE	FALSE	TRUE
Q8VI36	Pxn	7.752	7.72631	7.86606	7.70296	7.80907	7.7421	7.79681	7.77609	8.2817	8.31967	8.20635	8.24151	7.85237	7.82699	8.00256	7.93387	FALSE	0	2.86e-08	1.27e-06	0.5	1.69e-06	5.1e-05	-0.358	0.00777261	0.0737	0.142	-0.146	-0.165	-0.0233	0.335	TRUE	TRUE	FALSE	TRUE
Q8VHX6	Flnc	7.66709	7.75607	7.34743	7.42659	7.43788	7.36932	7.72103	7.50426	9.01227	9.09945	8.8956	9.02469	7.76446	7.83934	7.82309	7.92895	FALSE	0	1.74e-10	2.95e-08	1.46	3.28e-09	5.3e-07	-1.17	0.00638902	0.0661	0.29	-0.468	-0.427	-0.137	1.03	TRUE	TRUE	FALSE	TRUE
Q8VHK5	Mlc1	9.27904	9.26206	9.18138	9.38383	9.07349	9.1852	9.14181	9.07539	9.90027	9.91981	9.87286	9.85571	9.08084	9.10354	9.2205	9.1675	FALSE	0	2.04e-09	1.72e-07	0.611	1.47e-10	5.33e-08	-0.744	0.0109874	0.0883	-0.133	-0.237	-0.0799	-0.213	0.531	TRUE	TRUE	FALSE	TRUE
Q8VEL9	Rem2	7.11132	7.40928	6.72934	6.92185	6.78758	6.91008	6.81286	6.918	6.57636	6.40575	6.17542	6.37967	6.62916	6.77738	7.15398	7.10694	FALSE	0	0.000334571	0.00189	-0.659	0.00192779	0.0114	0.533	0.383595	0.63	-0.126	0.0568	0.243	0.117	-0.416	TRUE	TRUE	FALSE	TRUE
Q8VEK0	Tmem30a	8.97156	9.50742	9.24002	9.14071	9.27006	9.02775	9.26075	9.22567	8.95084	8.91349	8.85441	8.81349	9.29936	9.01046	9.25099	9.30818	FALSE	0	0.00455796	0.015	-0.332	0.00434863	0.0216	0.334	0.981553	0.993	0.00232	0.0682	0.0871	0.0894	-0.245	TRUE	TRUE	FALSE	TRUE
Q8VE85	Prelid3a	9.70759	9.74844	9.56893	9.44618	9.34551	9.60849	9.66547	9.68173	9.27986	9.15336	9.13612	9.23925	9.47116	9.58241	9.52723	9.68939	FALSE	0	0.000147544	0.00102	-0.416	0.000475789	0.00382	0.365	0.54475	0.756	-0.0502	0.0846	0.127	0.0769	-0.289	TRUE	TRUE	FALSE	TRUE
Q8VE52	Ogfrl1	8.13192	7.98648	8.07622	8.05663	8.12804	8.06028	8.0903	8.01597	7.65886	7.58682	7.71573	7.85311	7.94886	8.19657	7.84312	7.88228	FALSE	0	0.00019021	0.00124	-0.359	0.00246745	0.0138	0.264	0.206798	0.452	-0.0951	0.122	0.111	0.0158	-0.248	TRUE	TRUE	FALSE	TRUE
Q8VDV3	Rab3il1	5.57434	5.75494	5.78518	5.32366	5.81224	5.72686	5.92597	6.12861	6.28797	6.4325	6.11728	5.8557	5.88766	5.75085	5.71992	5.81314	FALSE	0	0.000476519	0.00249	0.564	0.00865772	0.0365	-0.38	0.164119	0.395	0.183	0.0299	-0.259	-0.0757	0.305	TRUE	TRUE	FALSE	TRUE
Q8VDP3	Mical1	7.84664	7.68504	7.859	7.6751	7.83977	7.76548	7.67329	7.65842	8.28831	8.29208	8.24747	8.29921	7.77767	7.76939	7.75278	7.74168	FALSE	0	4.94e-08	1.95e-06	0.515	4.26e-08	3.25e-06	-0.521	0.903887	0.964	-0.00606	-0.151	-0.119	-0.125	0.396	TRUE	TRUE	FALSE	TRUE
Q8VD66	Abhd4	7.08352	7.19905	7.0331	7.05737	6.96308	6.9887	6.84246	6.96781	7.46133	7.50929	7.47946	7.39976	6.93523	6.91393	7.11583	7.1284	FALSE	0	1.24e-05	0.000139	0.369	1.76e-06	5.27e-05	-0.439	0.235227	0.483	-0.0699	-0.189	-0.0366	-0.107	0.333	TRUE	TRUE	FALSE	TRUE
Q8VCW8	Acsf2	10.9415	11.0431	11.0673	11.0533	10.9667	10.9457	10.9705	10.9261	11.6348	11.677	11.5525	11.5959	11.0305	10.9902	11.0452	11.0224	FALSE	0	1.25e-10	2.53e-08	0.589	1.14e-10	4.6e-08	-0.593	0.906949	0.965	-0.00425	-0.202	-0.128	-0.132	0.461	TRUE	TRUE	FALSE	TRUE
Q8VCW4	Unc93b1	5.43659	5.14273	5.42643	4.91567	5.72083	5.13612	5.50686	5.60501	6.17723	6.35002	6.25736	6.43207	4.02585	6.08722	5.43173	5.76423	TRUE	9	0.00471628	0.0155	1.07	0.00862191	0.0364	-0.977	0.766861	0.892	0.0969	-0.0963	-0.358	-0.261	0.716	TRUE	TRUE	FALSE	TRUE
Q8VCR7	Abhd14b	8.8046	8.72835	8.9355	8.63644	8.76479	8.77646	8.9945	8.92712	9.30219	9.28009	9.39322	9.32434	8.83765	9.14299	8.7562	8.97441	FALSE	0	1.11e-05	0.000127	0.549	0.000282317	0.00257	-0.397	0.0888571	0.279	0.152	-0.108	-0.197	-0.0459	0.351	TRUE	TRUE	FALSE	TRUE
Q8VCF0	Mavs	9.23064	9.30365	9.42234	9.03957	9.13796	9.10561	9.11148	9.25064	9.67716	9.68204	9.53123	9.69092	9.29419	9.38968	9.3098	9.28841	FALSE	0	4.08e-05	0.000355	0.396	0.000278955	0.00255	-0.325	0.309282	0.557	0.0715	-0.19	-0.0925	-0.0211	0.304	TRUE	TRUE	FALSE	TRUE
Q8VCD6	Reep2	8.78822	8.78491	8.91982	8.84012	8.94052	8.83101	8.94635	8.92482	8.53754	8.5455	8.42624	8.66386	8.69457	8.85335	8.963	8.9664	FALSE	0	0.00040801	0.00221	-0.29	0.000139395	0.0015	0.326	0.576797	0.778	0.0361	0.122	0.0441	0.0802	-0.246	TRUE	TRUE	FALSE	TRUE
Q8VCC9	Spon1	6.88312	6.97561	6.56363	6.71165	6.68811	6.76233	6.79396	6.98984	6.48162	6.33284	6.37189	6.51518	6.56615	6.73403	6.90024	6.81326	FALSE	0	0.00183759	0.00729	-0.358	0.00348168	0.0181	0.328	0.752825	0.885	-0.0301	0.116	0.0908	0.0607	-0.267	TRUE	TRUE	FALSE	TRUE
Q8VCC8	Rapgef3	7.38475	7.17089	7.19526	6.69889	7.05505	6.75952	7.11054	7.37925	7.79789	7.63657	7.72559	7.53624	6.99743	7.32504	7.20076	7.34151	FALSE	0	0.00149435	0.0062	0.562	0.00633602	0.0287	-0.458	0.48008	0.709	0.104	-0.194	-0.157	-0.0535	0.404	TRUE	TRUE	FALSE	TRUE
Q8VCA8	Scrn2	7.77839	7.7127	7.74164	7.73214	7.7955	7.70323	7.85336	7.75477	8.16023	8.24168	8.18545	8.08606	7.75597	7.87882	7.78312	7.8781	FALSE	0	1.13e-07	3.91e-06	0.427	1.52e-06	4.73e-05	-0.344	0.0785342	0.262	0.0828	-0.101	-0.136	-0.0536	0.291	TRUE	TRUE	FALSE	TRUE
Q8R4V2	Dusp15	7.82373	7.89642	8.09222	8.08267	7.80113	7.82117	7.80231	7.82522	8.44504	8.38491	8.37766	8.28842	8.03683	8.08174	7.98422	7.95721	FALSE	0	5.56e-06	7.46e-05	0.4	1.82e-05	0.000318	-0.359	0.479949	0.709	0.0412	-0.231	-0.07	-0.0288	0.33	TRUE	TRUE	FALSE	TRUE
Q8R4T1	Cys1	7.40195	7.67797	6.90479	7.61453	6.79474	7.266	7.27032	6.89541	6.95324	6.56215	6.97095	6.87909	7.28901	7.08019	7.78781	7.39608	FALSE	0	0.0083866	0.0247	-0.558	0.00951189	0.0392	0.547	0.950457	0.984	-0.0115	-0.115	0.228	0.217	-0.33	TRUE	TRUE	FALSE	TRUE
Q8R4S0	Ppp1r14c	9.12538	9.03933	9.20193	9.26542	9.48782	9.13471	9.24803	9.42723	8.74632	8.73058	8.65575	8.80131	9.04905	9.41572	9.19975	9.26194	FALSE	0	0.000183734	0.00121	-0.425	3.82e-05	0.000551	0.498	0.399051	0.641	0.0736	0.213	0.0461	0.12	-0.378	TRUE	TRUE	FALSE	TRUE
Q8R464	Cadm4	10.0095	10.3379	10.1862	10.2983	10.2194	10.3038	10.1391	10.2543	10.6158	10.7083	10.7202	10.6914	10.2807	10.2542	10.2539	10.2968	FALSE	0	1.44e-06	2.65e-05	0.476	7.37e-06	0.000161	-0.412	0.308455	0.556	0.0635	-0.119	-0.14	-0.0767	0.336	TRUE	TRUE	FALSE	TRUE
Q8R422	Cd109	8.34011	8.40245	8.18123	8.23799	8.29	8.28487	8.59158	8.35465	8.74506	8.64754	8.57815	8.7772	8.28625	8.39312	8.38223	8.37032	FALSE	0	5.75e-05	0.000471	0.397	0.000338819	0.00297	-0.329	0.351768	0.598	0.0675	-0.0486	-0.138	-0.0709	0.258	TRUE	TRUE	FALSE	TRUE
Q8R3W5	Tsen15	7.86258	7.9271	7.78109	7.88905	7.81289	7.80785	7.85677	7.88038	7.15833	7.51635	7.293	7.44814	7.74953	7.68501	7.82412	7.72579	TRUE	13	1.43e-06	2.63e-05	-0.511	2.7e-05	0.000423	0.392	0.0862311	0.275	-0.119	0.138	0.164	0.045	-0.347	TRUE	TRUE	FALSE	TRUE
Q8R3P0	Aspa	10.2622	10.3957	10.4205	10.3878	10.3344	10.3353	10.2188	10.1099	11.0395	11.1754	11.123	10.9903	10.3698	10.4314	10.3722	10.506	FALSE	0	7.1e-09	4.69e-07	0.715	1.92e-08	1.84e-06	-0.662	0.380404	0.627	0.0533	-0.28	-0.163	-0.11	0.553	TRUE	TRUE	FALSE	TRUE
Q8R3B1	Plcd1	10.2329	10.0596	10.0681	10.1201	9.99276	10.114	10.132	10.0021	10.4901	10.5556	10.4763	10.4321	10.0393	10.1397	10.1548	10.195	FALSE	0	3.37e-06	5.09e-05	0.368	4.9e-06	0.000117	-0.356	0.813494	0.917	0.012	-0.14	-0.0801	-0.0681	0.288	TRUE	TRUE	FALSE	TRUE
Q8R2R9	Ap3m2	10.4457	10.4339	10.4109	10.4745	10.4564	10.384	10.4536	10.3454	10.1534	10.0876	10.1579	10.1811	10.3433	10.3958	10.447	10.4862	FALSE	0	2.1e-06	3.52e-05	-0.296	5.3e-06	0.000125	0.273	0.557771	0.766	-0.0232	0.0563	0.0877	0.0645	-0.209	TRUE	TRUE	FALSE	TRUE
Q8R2K1	Fuom	10.5161	10.272	10.3461	10.2705	10.3266	10.4703	10.5717	10.4884	10.7114	10.7168	10.6997	10.6612	10.4344	10.5288	10.374	10.3885	FALSE	0	4.84e-05	0.000408	0.346	0.000572883	0.00442	-0.266	0.20349	0.448	0.0802	-0.0218	-0.135	-0.0546	0.211	TRUE	TRUE	FALSE	TRUE
Q8R1Y2	Bmerb1	7.62335	7.79701	7.58098	7.47854	7.37905	7.4978	7.29214	7.56639	7.26077	7.32865	7.19247	7.19617	7.38169	7.63883	7.58326	7.56004	FALSE	0	0.000203479	0.0013	-0.375	0.00152365	0.00949	0.296	0.313998	0.561	-0.079	-0.026	0.16	0.0811	-0.215	TRUE	TRUE	FALSE	TRUE
Q8R1G6	Pdlim2	7.76318	7.34308	7.11367	7.41007	7.25776	7.41688	7.45844	7.49514	7.77819	8.14131	7.78029	8.16788	7.18386	7.52189	7.74362	7.36055	FALSE	0	0.00151989	0.00627	0.559	0.00284107	0.0155	-0.514	0.757327	0.887	0.045	-0.151	-0.151	-0.106	0.408	TRUE	TRUE	FALSE	TRUE
Q8R1F1	Niban2	8.6136	8.21251	8.25927	8.23932	8.17515	8.16223	8.35884	8.2677	8.82664	8.83158	8.73737	8.80208	8.21124	8.39269	8.34191	8.4006	FALSE	0	3.51e-05	0.000315	0.468	3.96e-05	0.000567	-0.463	0.946064	0.982	0.00543	-0.186	-0.0959	-0.0904	0.372	TRUE	TRUE	FALSE	TRUE
Q8R146	Apeh	9.35121	9.36517	9.46192	9.39175	9.41822	9.35526	9.38944	9.4174	9.6559	9.7399	9.60147	9.69263	9.28992	9.3987	9.28378	9.33607	FALSE	0	4.72e-06	6.68e-05	0.28	4.06e-07	1.81e-05	-0.345	0.117091	0.326	-0.0654	-0.0517	-0.0543	-0.12	0.226	TRUE	TRUE	FALSE	TRUE
Q8R0Y6	Aldh1l1	11.8582	11.8396	11.831	11.8577	11.7288	11.8271	11.7426	11.7824	12.359	12.3869	12.344	12.3897	11.8254	11.8505	11.9043	11.8572	FALSE	0	6.59e-11	1.5e-08	0.523	9.19e-11	3.93e-08	-0.511	0.680408	0.846	0.0127	-0.191	-0.115	-0.102	0.408	TRUE	TRUE	FALSE	TRUE
Q8R0X7	Sgpl1	9.47589	9.4895	9.47645	9.41259	9.49999	9.5515	9.52407	9.53066	10.2353	10.3118	10.1448	10.2913	9.52375	9.55826	9.63456	9.69896	FALSE	0	4.66e-11	1.21e-08	0.782	6.63e-10	1.78e-07	-0.642	0.00657369	0.0668	0.14	-0.183	-0.246	-0.106	0.536	TRUE	TRUE	FALSE	TRUE
Q8R086	Suox	8.64298	8.60552	8.75418	8.50287	8.69669	8.55837	8.69617	8.55814	9.08948	8.95905	9.02028	8.9299	8.56745	8.69601	8.6318	8.59243	FALSE	0	1.15e-05	0.00013	0.373	1.01e-05	0.000203	-0.378	0.93822	0.98	-0.00447	-0.0915	-0.0924	-0.0969	0.281	TRUE	TRUE	FALSE	TRUE
Q8R071	Itpka	12.2832	12.2259	12.2916	12.2136	12.3636	12.2244	12.2892	12.2529	11.9116	11.8975	11.9271	11.8951	12.1929	12.1876	12.2356	12.2948	FALSE	0	1.88e-07	5.56e-06	-0.346	4.84e-07	2.02e-05	0.32	0.494259	0.718	-0.0258	0.115	0.0857	0.0598	-0.26	TRUE	TRUE	FALSE	TRUE
Q8R015	Bloc1s5	5.56174	5.61619	5.5469	5.25546	5.6672	6.21181	5.88879	5.86784	6.30917	6.71026	6.45859	6.8625	5.42709	5.84397	5.72059	6.02411	TRUE	2	3.38e-06	5.1e-05	1.09	6.2e-05	0.000792	-0.831	0.102213	0.301	0.259	-0.0269	-0.441	-0.182	0.649	TRUE	TRUE	FALSE	TRUE
Q8K596	Slc8a2	10.8467	11.2124	11.1881	11.2412	11.318	11.1293	11.2613	11.2015	10.8539	10.862	10.8318	10.8102	11.2211	11.1438	11.1659	11.2092	FALSE	0	0.00134736	0.00572	-0.283	0.000243721	0.00228	0.345	0.390663	0.634	0.0629	0.134	0.0286	0.0915	-0.254	TRUE	TRUE	FALSE	TRUE
Q8K4Q7	Cerk	5.66712	5.57501	6.10117	5.50802	5.9163	6.266	5.80767	5.91753	6.29996	6.54442	6.46811	6.15157	5.40162	5.8795	5.22859	6.20203	TRUE	2	0.0041427	0.0139	0.653	0.00287872	0.0156	-0.688	0.857859	0.943	-0.0349	0.0435	-0.221	-0.255	0.433	TRUE	TRUE	FALSE	TRUE
Q8K4P8	Hecw1	7.43037	7.45111	7.68306	7.67353	7.61608	7.604	7.46828	7.65612	7.08547	6.78437	6.81348	6.91288	7.51739	7.23179	7.46506	7.37672	FALSE	0	1.33e-06	2.47e-05	-0.66	3.01e-05	0.000458	0.499	0.0707682	0.247	-0.162	0.226	0.199	0.0371	-0.462	TRUE	TRUE	FALSE	TRUE
Q8K406	Lgi3	8.83561	8.86435	9.07505	8.97123	8.84766	8.80405	8.63113	8.74821	9.35446	9.36604	9.32201	9.28919	8.94035	9.21447	9.12293	8.97958	FALSE	0	3.95e-05	0.000346	0.396	0.00135778	0.00864	-0.269	0.0792753	0.263	0.128	-0.265	-0.0863	0.0414	0.31	TRUE	TRUE	FALSE	TRUE
Q8K3R3	Plcd4	5.13635	6.06531	5.54716	5.66	5.95351	6.43189	6.06059	5.7385	6.16192	6.01209	6.29987	6.2876	5.78615	5.42788	5.5165	5.71202	TRUE	1	0.00420514	0.0141	0.588	0.00463601	0.0227	-0.58	0.961739	0.988	0.00843	0.184	-0.26	-0.252	0.328	TRUE	TRUE	FALSE	TRUE
Q8K386	Rab15	8.86264	8.81488	8.93115	8.85757	8.85191	8.82664	8.88392	9.02603	8.29078	8.5035	8.38495	8.30895	8.76882	8.79785	8.83648	8.84369	FALSE	0	1.71e-07	5.14e-06	-0.495	7.1e-07	2.64e-05	0.44	0.311497	0.558	-0.0549	0.16	0.13	0.0748	-0.365	TRUE	TRUE	FALSE	TRUE
Q8K370	Acad10	7.60777	7.61309	7.78293	7.32013	7.66264	7.60177	7.68828	7.70039	8.05558	8.02712	8.07029	7.94556	7.64716	7.80746	7.58696	7.73548	FALSE	0	4.91e-05	0.000413	0.444	0.000752504	0.00548	-0.33	0.164431	0.395	0.113	-0.0775	-0.16	-0.0465	0.284	TRUE	TRUE	FALSE	TRUE
Q8K354	Cbr3	12.0374	11.985	12.0264	12.0485	12.0322	12.0172	12.1094	11.9774	12.3574	12.3545	12.317	12.4049	12.0391	12.1127	12.1237	12.1061	FALSE	0	1.5e-07	4.69e-06	0.334	2.61e-06	7.23e-05	-0.263	0.0610682	0.23	0.0711	-0.094	-0.104	-0.0326	0.23	TRUE	TRUE	FALSE	TRUE
Q8K330	Ssh3	7.3935	7.15341	7.20055	7.00111	7.38265	7.31059	7.35545	7.58354	7.69248	7.88764	7.4986	7.59446	7.21899	7.47361	7.12837	7.40018	FALSE	0	0.000332189	0.00188	0.481	0.00317919	0.0168	-0.363	0.267491	0.515	0.118	0.0159	-0.205	-0.0869	0.276	TRUE	TRUE	FALSE	TRUE
Q8K2P1	Lurap1l	7.11185	6.6143	6.56017	6.87908	6.53556	7.0949	6.60044	6.66712	5.89238	6.03113	6.0124	5.94904	6.30897	6.44613	6.68265	6.90379	TRUE	6	7.1e-05	0.000555	-0.82	0.000971868	0.00667	0.614	0.185933	0.424	-0.206	0.206	0.273	0.0673	-0.547	TRUE	TRUE	FALSE	TRUE
Q8K1X4	Nckap1l	6.792	6.803	6.74496	6.78595	6.94691	7.17083	7.05571	7.04527	7.5089	7.51568	7.27776	7.50652	6.81121	6.90562	7.12741	6.97827	FALSE	0	1.3e-07	4.29e-06	0.671	4.6e-06	0.000114	-0.497	0.0247671	0.134	0.174	-0.00632	-0.28	-0.105	0.391	TRUE	TRUE	FALSE	TRUE
Q8K1S4	Unc5a	9.07987	8.89014	8.83918	9.04163	8.84649	9.03591	8.99	9.05571	8.6879	8.59943	8.69425	8.75253	8.9756	8.96318	9.06945	8.88689	FALSE	0	0.000528173	0.0027	-0.279	0.000376135	0.0032	0.29	0.862104	0.945	0.0111	0.0815	0.0622	0.0733	-0.217	TRUE	TRUE	FALSE	TRUE
Q8K1S3	Unc5b	7.45191	7.48673	7.71323	7.67915	7.48844	7.60265	7.4418	7.621	7.98913	7.94354	8.01296	7.81067	7.5896	7.74947	7.45718	7.36458	FALSE	0	0.000792142	0.00373	0.356	0.000298415	0.00268	-0.399	0.619587	0.809	-0.0426	-0.112	-0.0674	-0.11	0.289	TRUE	TRUE	FALSE	TRUE
Q8K1S1	Lgi4	7.05263	7.01576	6.76955	7.13886	6.79668	6.91003	6.7078	6.93974	7.56562	7.50274	7.28233	7.36526	6.93848	6.97821	7.22899	6.95773	FALSE	0	0.000264004	0.00158	0.435	0.000515796	0.00407	-0.403	0.730728	0.871	0.0316	-0.233	-0.0777	-0.0461	0.357	TRUE	TRUE	FALSE	TRUE
Q8K1R7	Nek9	8.29504	8.25538	8.30617	8.18388	8.27592	8.39916	8.38828	8.34031	8.62695	8.60458	8.55497	8.4958	8.21542	8.32499	8.18931	8.31014	FALSE	0	7e-06	8.96e-05	0.31	6.97e-06	0.000154	-0.311	0.997396	0.999	-0.00015	-0.00948	-0.1	-0.1	0.21	TRUE	TRUE	FALSE	TRUE
Q8K1B8	Fermt3	7.3894	7.46066	7.27096	7.37426	7.23649	7.19473	7.42486	7.49297	8.03744	8.0024	7.84135	8.00641	7.59651	7.49034	7.64652	7.62925	FALSE	0	4.77e-07	1.15e-05	0.598	7e-05	0.000881	-0.381	0.00698289	0.069	0.217	-0.231	-0.195	0.0222	0.403	TRUE	TRUE	FALSE	TRUE
Q8K157	Galm	8.36145	8.10556	7.8269	7.96496	7.67008	7.72886	8.3113	8.30473	8.7182	8.78891	8.81551	8.5711	8.2405	8.359	8.28915	8.08598	FALSE	0	0.000538151	0.00273	0.659	0.00585928	0.0272	-0.48	0.246599	0.495	0.179	-0.255	-0.194	-0.0152	0.465	TRUE	TRUE	FALSE	TRUE
Q8K0S0	Phyhip	12.2597	12.1714	12.0596	12.141	12.1007	12.108	12.0858	12.088	11.6982	11.6357	11.6307	11.7248	11.9365	11.9645	12.1024	12.0293	FALSE	0	3.77e-08	1.56e-06	-0.486	3.25e-06	8.68e-05	0.336	0.00528182	0.0589	-0.15	0.112	0.174	0.0247	-0.311	TRUE	TRUE	FALSE	TRUE
Q8K093	Trhde	9.12751	9.19004	9.19609	9.13225	9.22425	9.16614	9.26383	9.16271	8.67656	8.60769	8.56719	8.70929	9.05437	8.8207	8.95428	9.15262	FALSE	0	4.04e-07	1.02e-05	-0.521	3.08e-05	0.000466	0.355	0.0138709	0.1	-0.166	0.204	0.161	-0.00485	-0.36	TRUE	TRUE	FALSE	TRUE
Q8K010	Oplah	9.61344	9.61263	9.55076	9.70443	9.54195	9.56466	9.58297	9.52566	10.0728	10.0517	10.0691	10.0607	9.61785	9.64906	9.68622	9.61048	FALSE	0	2.77e-09	2.26e-07	0.443	5.15e-09	6.57e-07	-0.423	0.55327	0.762	0.0206	-0.166	-0.0993	-0.0787	0.344	TRUE	TRUE	FALSE	TRUE
Q8K009	Aldh1l2	8.89657	8.92077	8.79996	8.71999	8.92841	8.79611	8.85648	8.97177	9.22781	9.20309	9.176	9.36757	8.67124	8.68103	8.71183	8.84886	FALSE	0	7.42e-06	9.31e-05	0.409	5.16e-07	2.12e-05	-0.515	0.0968381	0.293	-0.106	-0.0354	-0.0893	-0.195	0.32	TRUE	TRUE	FALSE	TRUE
Q8JZV9	Bdh2	7.21047	7.2799	7.07486	6.77641	7.06693	7.17013	7.21135	7.08842	7.38524	7.53094	7.31928	7.26939	7.12262	6.92691	6.9471	7.01752	TRUE	1	0.00692582	0.0211	0.291	0.00118208	0.00772	-0.373	0.388974	0.634	-0.0819	-0.0156	-0.0644	-0.146	0.226	TRUE	TRUE	FALSE	TRUE
Q8JZP2	Syn3	10.0784	10.1963	10.1992	10.1027	10.2158	10.1271	10.1764	10.1282	9.66236	9.60449	9.71998	9.68547	10.0068	9.92733	9.89841	9.95051	FALSE	0	9.61e-09	5.77e-07	-0.476	6.64e-06	0.000149	0.278	0.000207349	0.0127	-0.198	0.182	0.164	-0.0342	-0.312	TRUE	TRUE	FALSE	TRUE
Q8JZK9	Hmgcs1	9.61017	9.27481	9.56264	9.3092	9.67774	9.56751	9.56785	9.5294	8.86106	8.61815	9.00635	9.03527	9.46431	9.5696	9.50822	9.55388	FALSE	0	2.3e-05	0.000227	-0.559	4.93e-06	0.000117	0.644	0.364247	0.61	0.0848	0.228	0.0819	0.167	-0.477	TRUE	TRUE	FALSE	TRUE
Q8CJH3	Plxnb1	9.53953	9.52802	9.52822	9.49638	9.56258	9.49066	9.48789	9.57056	9.82451	9.85611	9.75266	9.80475	9.46375	9.46802	9.45348	9.47391	FALSE	0	2.54e-07	7.08e-06	0.286	2.52e-08	2.2e-06	-0.345	0.08347	0.27	-0.0582	-0.0534	-0.0583	-0.117	0.228	TRUE	TRUE	FALSE	TRUE
Q8CI70	Lrrc20	7.79845	7.84891	7.6638	7.90277	7.52056	7.78094	7.76605	7.54528	7.49694	7.60161	7.47491	7.51556	7.82668	7.66895	7.90746	7.83419	FALSE	0	0.00145581	0.00608	-0.281	0.00123913	0.00802	0.287	0.936014	0.979	0.00583	-0.0439	0.106	0.112	-0.175	TRUE	TRUE	FALSE	TRUE
Q8CI51	Pdlim5	9.82787	9.61093	9.49798	9.58046	9.48978	9.62569	9.76912	9.70411	10.1987	10.2741	10.172	10.1539	9.75112	9.83288	9.84081	9.82893	FALSE	0	7.51e-07	1.61e-05	0.57	5.58e-05	0.000735	-0.386	0.0170414	0.112	0.184	-0.175	-0.193	-0.00896	0.377	TRUE	TRUE	FALSE	TRUE
Q8CHX7	Rftn2	8.58767	8.61648	8.57481	8.60951	8.57354	8.53096	8.64551	8.67185	9.02778	9.07416	8.8782	8.97229	8.53705	8.6765	8.52092	8.65875	FALSE	0	1.49e-06	2.72e-05	0.391	1.55e-06	4.81e-05	-0.39	0.981241	0.993	0.00118	-0.0918	-0.1	-0.0989	0.291	TRUE	TRUE	FALSE	TRUE
Q8CHG7	Rapgef2	11.4805	11.5765	11.5084	11.6197	11.5422	11.6041	11.6286	11.5507	11.2109	11.2183	11.2524	11.2309	11.5094	11.511	11.4812	11.5112	FALSE	0	2.35e-07	6.57e-06	-0.318	1.34e-06	4.32e-05	0.275	0.23238	0.48	-0.0431	0.117	0.0815	0.0384	-0.237	TRUE	TRUE	FALSE	TRUE
Q8CGV2	Tph2	8.23714	8.15504	8.39264	8.33002	8.42797	8.21907	8.1574	8.14858	8.6101	8.69321	8.57143	8.6745	8.23889	8.40749	8.26492	8.28615	FALSE	0	9.06e-05	0.000679	0.359	0.000160282	0.00167	-0.338	0.7603	0.889	0.0207	-0.125	-0.0847	-0.064	0.274	TRUE	TRUE	FALSE	TRUE
Q8CFV4	Nrn1	9.28852	9.22006	9.16949	9.21277	9.272	9.16847	9.20032	9.2956	8.42062	8.45565	8.59741	8.59564	9.17744	9.35273	9.32056	9.32475	FALSE	0	1.8e-09	1.58e-07	-0.705	5.03e-10	1.52e-07	0.777	0.194277	0.436	0.0712	0.167	0.156	0.227	-0.55	TRUE	TRUE	FALSE	TRUE
Q8CFB4	Gbp5	6.57896	6.84289	6.5208	7.2138	7.07354	6.90479	6.57372	6.63877	7.69522	7.76414	7.52358	7.55238	6.82304	6.76387	7.00291	6.7976	TRUE	1	2.87e-05	0.00027	0.845	5.93e-05	0.000769	-0.787	0.685403	0.849	0.0577	-0.219	-0.228	-0.17	0.617	TRUE	TRUE	FALSE	TRUE
Q8CC86	Naprt	7.99754	8.09849	8.21289	8.17646	8.11177	8.08864	8.1792	8.06338	8.86241	8.87755	8.74147	8.90221	8.24453	8.25489	8.31201	8.28252	FALSE	0	5.25e-10	6.47e-08	0.725	1.16e-08	1.23e-06	-0.572	0.00756563	0.0723	0.152	-0.227	-0.217	-0.0644	0.508	TRUE	TRUE	FALSE	TRUE
Q8CC35	Synpo	11.5126	11.5498	11.5642	11.5144	11.6387	11.564	11.6491	11.5915	11.1696	11.1364	11.2393	11.2804	11.4442	11.4835	11.4765	11.5483	FALSE	0	4.52e-07	1.11e-05	-0.329	2.79e-06	7.66e-05	0.282	0.230758	0.479	-0.0471	0.151	0.0751	0.028	-0.254	TRUE	TRUE	FALSE	TRUE
Q8CBX0	Tmem63c	7.26575	7.20787	7.28285	7.452	7.2284	7.39292	7.20836	7.40302	7.21185	7.04915	6.71511	6.84017	7.15536	7.48979	7.50106	7.35966	FALSE	0	0.00462654	0.0152	-0.348	0.00111281	0.00736	0.422	0.48473	0.713	0.0743	0.073	0.0669	0.141	-0.281	TRUE	TRUE	FALSE	TRUE
Q8CB27	Yod1	9.46771	9.33563	9.1002	9.33228	9.0632	9.29029	9.12982	9.13925	8.93867	8.74662	8.94035	8.99078	9.12558	9.25417	9.41589	9.18664	FALSE	0	0.000235075	0.00145	-0.405	0.00102289	0.00692	0.341	0.457032	0.691	-0.0634	0.00207	0.155	0.092	-0.249	TRUE	TRUE	FALSE	TRUE
Q8CAA7	Pgm2l1	12.8373	12.8395	12.7994	12.8546	12.7731	12.7636	12.7678	12.8072	12.3675	12.3216	12.4377	12.3559	12.7256	12.6697	12.7538	12.7123	FALSE	0	6.55e-10	7.8e-08	-0.462	2.98e-08	2.52e-06	0.345	0.00233165	0.0409	-0.117	0.104	0.159	0.0412	-0.303	TRUE	TRUE	FALSE	TRUE
Q8C650	Septin10	7.95475	7.73959	7.79113	7.7866	7.68477	7.75542	7.59618	7.82826	8.20997	8.25097	8.20237	8.15057	7.83701	7.86237	7.98406	7.83444	FALSE	0	8.26e-06	0.000102	0.385	5.19e-05	0.000698	-0.324	0.29675	0.545	0.0615	-0.188	-0.0863	-0.0248	0.299	TRUE	TRUE	FALSE	TRUE
Q8C3X8	Lmf2	6.64592	6.95766	6.9442	6.77355	7.1387	7.30465	7.55849	7.28079	7.7648	7.71163	7.58464	7.67154	7.1914	6.8826	6.74134	7.021	FALSE	0	8.8e-07	1.79e-05	0.853	5.8e-06	0.000134	-0.724	0.232522	0.48	0.129	0.122	-0.368	-0.239	0.485	TRUE	TRUE	FALSE	TRUE
Q8C3X2	Ccdc90b	7.57358	7.55593	7.70465	7.48543	7.49274	7.5681	7.51219	7.6609	8.04955	8.11081	8.10936	8.20153	7.76831	7.72772	7.60894	7.72615	FALSE	0	9.33e-08	3.3e-06	0.538	2.43e-06	6.95e-05	-0.41	0.033038	0.159	0.128	-0.183	-0.161	-0.0332	0.377	TRUE	TRUE	FALSE	TRUE
Q8C3Q5	Shisa7	8.53117	8.72393	8.59036	8.63559	8.53616	8.67661	8.65982	8.67477	8.19995	8.22488	8.26755	8.1644	8.57778	8.52923	8.64696	8.64805	FALSE	0	5.93e-07	1.34e-05	-0.406	1.07e-06	3.56e-05	0.386	0.683959	0.849	-0.0198	0.119	0.102	0.0826	-0.304	TRUE	TRUE	FALSE	TRUE
Q8C3J5	Dock2	6.12941	5.87314	5.98353	6.21335	5.76611	6.06854	6.06081	5.98396	6.7008	6.76199	6.63819	6.75993	5.99593	6.06794	6.02546	6.03362	FALSE	0	3.36e-07	8.85e-06	0.665	2.38e-07	1.21e-05	-0.684	0.800692	0.912	-0.0191	-0.222	-0.142	-0.161	0.524	TRUE	TRUE	FALSE	TRUE
Q8C166	Cpne1	10.7422	10.7653	10.8066	10.8453	10.8903	10.8496	10.8576	10.7526	11.1106	11.1174	11.0467	11.088	10.8072	10.8644	10.7988	10.7251	FALSE	0	2.36e-06	3.89e-05	0.301	3.35e-06	8.86e-05	-0.292	0.823169	0.923	0.00902	-0.0417	-0.0894	-0.0804	0.211	TRUE	TRUE	FALSE	TRUE
Q8C120	Sh3rf3	8.85741	8.1232	8.12333	8.38362	8.37481	8.42862	8.34838	8.1551	8.04108	7.95261	7.73499	7.86824	8.19032	8.26224	8.34735	8.34573	FALSE	0	0.00281203	0.0102	-0.473	0.0103386	0.0416	0.387	0.524486	0.74	-0.0855	0.106	0.151	0.0653	-0.322	TRUE	TRUE	FALSE	TRUE
Q8C0E3	Trim47	4.8669	5.00879	4.68501	4.9968	5.1885	5.17088	4.85712	5.23216	5.69452	5.938	5.56109	5.78005	5.37439	5.2126	4.55296	5.0996	TRUE	6	5e-05	0.000419	0.854	0.000412307	0.00344	-0.684	0.271407	0.518	0.171	-0.089	-0.312	-0.141	0.542	TRUE	TRUE	FALSE	TRUE
Q8C033	Arhgef10	7.89098	7.79768	7.9906	7.80606	7.72175	7.90666	7.72777	7.7932	8.44216	8.43634	8.43275	8.38289	7.91421	8.00148	7.8692	7.89953	FALSE	0	3.04e-08	1.34e-06	0.552	9.98e-08	6.31e-06	-0.502	0.344091	0.592	0.0498	-0.213	-0.129	-0.0797	0.423	TRUE	TRUE	FALSE	TRUE
Q8BZF8	Pgm5	7.13973	6.71548	6.81653	6.94265	6.7753	6.93992	7.00002	7.05066	7.33802	7.38605	7.14152	7.33691	6.81175	6.97544	7.00223	6.90615	FALSE	0	0.000441757	0.00235	0.397	0.000692366	0.00512	-0.377	0.819332	0.921	0.0203	-0.0759	-0.114	-0.0935	0.283	TRUE	TRUE	FALSE	TRUE
Q8BZ09	Slc25a21	7.13254	7.2189	7.29973	6.89065	7.29065	7.47604	7.2225	7.56544	7.44765	7.94049	7.94942	7.90288	7.48906	7.19847	7.34478	7.42189	FALSE	0	6.15e-05	0.000498	0.675	0.00226613	0.0129	-0.447	0.0782409	0.261	0.228	-0.0358	-0.289	-0.0609	0.386	TRUE	TRUE	FALSE	TRUE
Q8BYZ7	Elmo3	4.86802	4.14794	4.384	4.52527	4.19904	4.01628	4.37021	4.00199	5.2335	5.31545	5.01396	5.02767	3.93781	4.42634	4.20347	4.19998	TRUE	6	0.000325283	0.00186	0.666	8.76e-06	0.000183	-0.956	0.0597594	0.227	-0.289	-0.345	-0.0106	-0.3	0.656	TRUE	TRUE	FALSE	TRUE
Q8BYZ1	Abi3	7.68768	7.96107	7.72034	7.8497	7.77658	7.75487	7.79893	8.04361	8.22685	8.38471	8.39756	8.27285	8.09238	7.83073	8.04367	7.90383	FALSE	0	1.5e-05	0.000162	0.516	0.000591156	0.00453	-0.353	0.0613366	0.23	0.163	-0.141	-0.179	-0.0164	0.336	TRUE	TRUE	FALSE	TRUE
Q8BYW1	Arhgap25	6.64034	6.22804	6.4178	6.40042	5.83592	6.15556	6.04742	6.02217	6.68832	6.95155	6.8741	6.94363	6.38513	6.32668	6.36621	6.32881	FALSE	0	0.000118922	0.000844	0.443	2.72e-05	0.000426	-0.513	0.420582	0.658	-0.0699	-0.398	0.00839	-0.0615	0.451	TRUE	TRUE	FALSE	TRUE
Q8BYM5	Nlgn3	11.2404	11.1257	11.0929	11.0837	11.0437	11.1719	11.1022	11.1213	10.8546	10.7573	10.8472	10.8752	11.0837	11.0049	11.1768	11.1798	FALSE	0	2.38e-05	0.000234	-0.302	5.67e-05	0.000741	0.278	0.626884	0.813	-0.0244	0.0622	0.0881	0.0637	-0.214	TRUE	TRUE	FALSE	TRUE
Q8BYI6	Lpcat2	7.66734	7.48144	7.61708	7.61793	7.763	7.74843	7.99375	7.79945	8.60762	8.63117	8.51897	8.56399	7.77723	7.82699	7.84121	7.85425	FALSE	0	3.53e-11	1.07e-08	0.984	1.23e-09	2.56e-07	-0.756	0.000851557	0.0263	0.229	-0.131	-0.361	-0.132	0.624	TRUE	TRUE	FALSE	TRUE
Q8BXR1	Slc7a14	10.561	10.6333	10.7439	10.7813	10.8277	10.6777	10.7185	10.6671	10.1982	10.2844	10.3482	10.2598	10.7112	10.6401	10.693	10.7304	FALSE	0	1.82e-06	3.18e-05	-0.407	1.23e-06	4e-05	0.421	0.796356	0.91	0.0138	0.131	0.0876	0.101	-0.32	TRUE	TRUE	FALSE	TRUE
Q8BXB6	Slco2b1	7.22399	6.90886	6.83789	7.03465	7.03241	7.27821	7.36227	7.04137	7.63462	7.4864	7.54076	7.58727	7.03762	7.26945	6.93719	7.45118	FALSE	0	0.000193303	0.00125	0.561	0.00382453	0.0195	-0.388	0.14704	0.37	0.173	-0.0504	-0.228	-0.0551	0.333	TRUE	TRUE	FALSE	TRUE
Q8BWU1	Sprn	7.70279	7.74676	7.68962	7.65491	7.95846	7.7936	7.8304	8.04654	6.85479	6.83015	7.12873	7.10262	7.67976	7.50382	7.59062	7.31517	FALSE	0	7.36e-07	1.59e-05	-0.719	1.77e-05	0.00031	0.543	0.0589595	0.225	-0.176	0.38	0.172	-0.00445	-0.548	TRUE	TRUE	FALSE	TRUE
Q8BW96	Camk1d	9.55409	9.66407	9.31907	9.53525	9.34524	9.61978	9.3174	9.4341	9.02566	9.11707	9.04911	8.98291	9.32182	9.27688	9.54409	9.4806	FALSE	0	4.67e-05	0.000394	-0.474	0.000585876	0.0045	0.362	0.193353	0.435	-0.112	0.0799	0.169	0.0567	-0.306	TRUE	TRUE	FALSE	TRUE
Q8BW75	Maob	10.3623	10.5008	10.3697	10.4236	10.5644	10.4441	10.6509	10.5002	10.8596	10.9641	10.7594	10.9071	10.4379	10.5641	10.4992	10.5794	FALSE	0	8.15e-07	1.7e-05	0.458	1.6e-05	0.000288	-0.352	0.074793	0.255	0.106	-0.0468	-0.173	-0.0665	0.286	TRUE	TRUE	FALSE	TRUE
Q8BVZ5	Il33	6.63677	6.88887	7.03153	6.89326	6.98539	6.71089	6.88396	6.72011	7.7009	7.57491	7.68729	7.5125	6.94664	7.1082	6.64424	6.87628	FALSE	0	2.6e-06	4.19e-05	0.756	4.21e-06	0.000107	-0.725	0.760385	0.889	0.0312	-0.225	-0.188	-0.156	0.569	TRUE	TRUE	FALSE	TRUE
Q8BVW0	Ganc	7.26787	7.32335	7.51459	7.26224	7.39783	7.33915	7.35686	7.45123	7.69916	7.76332	7.84422	7.84439	7.63474	7.47775	7.36139	7.26944	FALSE	0	2.89e-05	0.000271	0.446	0.000289178	0.00262	-0.352	0.223671	0.473	0.0938	-0.102	-0.146	-0.0521	0.3	TRUE	TRUE	FALSE	TRUE
Q8BUR4	Dock1	10.7127	10.8581	10.886	10.6796	10.8824	10.6825	10.7963	10.821	11.2154	11.2652	11.1812	11.1307	10.733	10.7534	10.7068	10.8186	FALSE	0	2.37e-06	3.89e-05	0.414	1.01e-06	3.46e-05	-0.445	0.576332	0.778	-0.0312	-0.0871	-0.0986	-0.13	0.315	TRUE	TRUE	FALSE	TRUE
Q8BTF8	Ralyl	7.02157	7.24753	7.01974	7.09318	7.00177	6.86511	6.8422	6.83301	6.59857	6.66581	6.44346	6.78091	6.85426	6.99269	7.07253	6.92147	FALSE	0	1.53e-05	0.000164	-0.473	0.000414764	0.00346	0.338	0.0876875	0.278	-0.135	-0.00534	0.205	0.0694	-0.269	TRUE	TRUE	FALSE	TRUE
Q8BT60	Cpne3	8.87634	8.76872	8.69865	8.78776	8.56448	8.71771	8.752	8.6266	9.20949	9.19441	9.13079	9.07419	8.80985	8.82984	8.93585	8.95267	FALSE	0	6.58e-06	8.52e-05	0.369	0.000165055	0.00171	-0.27	0.0834393	0.27	0.0992	-0.205	-0.0877	0.0115	0.282	TRUE	TRUE	FALSE	TRUE
Q8BSY0	Asph	6.02414	5.84395	5.87707	5.72845	5.9208	6.0108	6.20717	5.96469	6.63478	6.75095	6.51449	6.7728	5.89506	6.06565	6.3314	6.19118	FALSE	0	6.71e-07	1.48e-05	0.8	4.55e-05	0.000628	-0.547	0.0182615	0.116	0.252	-0.145	-0.302	-0.05	0.497	TRUE	TRUE	FALSE	TRUE
Q8BRM2	Gorab	7.42433	7.07772	7.35471	7.48199	7.04786	7.46696	7.49532	7.47408	7.16971	7.09368	6.79916	7.03125	7.25605	7.48858	7.42959	7.46643	FALSE	0	0.0153984	0.0402	-0.311	0.00407473	0.0205	0.387	0.514895	0.733	0.0755	0.0862	0.0498	0.125	-0.261	TRUE	TRUE	FALSE	TRUE
Q8BPU7	Elmo1	8.97255	9.16108	9.05658	9.00977	9.13153	9.01764	9.03574	8.88976	9.54297	9.51449	9.5406	9.50387	9.08455	9.16438	9.11665	9.15628	FALSE	0	1.47e-07	4.63e-06	0.475	1.37e-06	4.36e-05	-0.395	0.127044	0.341	0.0805	-0.162	-0.131	-0.0507	0.344	TRUE	TRUE	FALSE	TRUE
Q8BPB5	Efemp1	5.5983	5.9519	5.49033	5.35548	5.82312	5.88339	5.74633	6.02191	6.54953	6.65185	6.51191	6.55137	5.67981	5.60804	6.08571	5.8024	FALSE	0	9.86e-07	1.95e-05	0.967	1.27e-05	0.000242	-0.772	0.121021	0.332	0.195	-0.0883	-0.358	-0.163	0.609	TRUE	TRUE	FALSE	TRUE
Q8BP92	Rcn2	10.0975	10.0843	10.1137	10.162	10.0228	10.2149	10.125	10.1326	10.5027	10.6539	10.5978	10.572	10.2681	10.247	10.0825	10.1746	FALSE	0	1.83e-07	5.45e-06	0.467	1.67e-06	5.09e-05	-0.389	0.135211	0.353	0.0787	-0.129	-0.139	-0.0602	0.328	TRUE	TRUE	FALSE	TRUE
Q8BP78	Fra10ac1	6.92787	6.25279	6.7929	6.36167	6.94983	6.6527	7.03818	6.39872	6.15212	6.17953	6.00749	6.23713	6.5388	6.7582	6.66016	6.81415	FALSE	0	0.0122735	0.0335	-0.44	0.00297143	0.016	0.549	0.488402	0.714	0.109	0.215	0.0387	0.148	-0.401	TRUE	TRUE	FALSE	TRUE
Q8BP71	Rbfox2	8.49021	8.27777	8.28414	8.24942	8.18375	8.23338	8.25881	8.44959	7.81215	7.85275	7.63142	7.77215	8.14899	8.01429	8.15651	8.1018	FALSE	0	1.05e-06	2.04e-05	-0.558	0.000214615	0.00208	0.338	0.00625769	0.0656	-0.22	0.162	0.206	-0.0144	-0.353	TRUE	TRUE	FALSE	TRUE
Q8BNA6	Fat3	7.05498	7.00259	6.9134	6.85632	7.03141	6.96439	6.92134	6.9213	6.63713	6.41479	6.60965	6.67187	6.8519	6.8856	6.89247	6.79217	FALSE	0	1.29e-05	0.000144	-0.373	0.000301411	0.0027	0.272	0.0985312	0.296	-0.101	0.121	0.118	0.0167	-0.255	TRUE	TRUE	FALSE	TRUE
Q8BMS1	Hadha	13.2726	13.1237	13.061	13.1323	13.0021	13.1347	13.2137	13.1217	13.5301	13.5329	13.507	13.5171	13.1331	13.12	13.1472	13.1113	FALSE	0	1.4e-06	2.57e-05	0.374	7.66e-07	2.83e-05	-0.394	0.685202	0.849	-0.0195	-0.111	-0.0814	-0.101	0.293	TRUE	TRUE	FALSE	TRUE
Q8BM13	Olfm2	8.48915	8.68649	8.65719	8.94292	8.36568	8.64568	8.38144	8.53626	8.15754	7.94988	8.32151	8.44523	8.75613	8.64016	8.78245	8.47613	FALSE	0	0.000952095	0.00436	-0.475	0.0016016	0.00981	0.445	0.795442	0.909	-0.0302	-0.0324	0.179	0.149	-0.296	TRUE	TRUE	FALSE	TRUE
Q8BLQ9	Cadm2	12.3323	12.2637	12.2683	12.3415	12.081	12.2611	12.2141	12.2362	11.9145	12.0246	11.8954	11.9398	12.1973	12.2361	12.3309	12.2536	FALSE	0	1.55e-06	2.79e-05	-0.358	7.7e-06	0.000166	0.311	0.318684	0.565	-0.047	0.0237	0.127	0.0801	-0.231	TRUE	TRUE	FALSE	TRUE
Q8BLK3	Lsamp	12.5387	12.3215	12.3995	12.3858	12.2667	12.2504	12.1493	12.1775	11.8938	11.8608	12.055	12.171	12.4049	12.3803	12.4438	12.3511	FALSE	0	1.4e-05	0.000153	-0.416	2.15e-05	0.000363	0.4	0.803105	0.913	-0.0163	-0.0422	0.158	0.142	-0.258	TRUE	TRUE	FALSE	TRUE
Q8BLC3	Lypd1	6.32415	6.4306	6.2118	6.36675	6.21981	6.25468	6.47322	6.63521	6.03359	5.85633	6.16406	5.762	6.62009	6.08801	6.5516	6.3416	FALSE	0	0.00777706	0.0232	-0.379	0.00260819	0.0145	0.446	0.592675	0.789	0.067	0.125	0.0625	0.129	-0.317	TRUE	TRUE	FALSE	TRUE
Q8BKX1	Baiap2	13.1067	13.1607	13.1214	13.1297	13.2242	13.2229	13.2482	13.2097	12.7667	12.6661	12.8081	12.8435	13.1227	13.1154	13.1112	13.1556	FALSE	0	8.03e-08	3.02e-06	-0.359	9.04e-08	5.76e-06	0.355	0.925409	0.973	-0.0034	0.163	0.0663	0.0629	-0.292	TRUE	TRUE	FALSE	TRUE
Q8BJD1	Itih5	8.48365	8.27593	8.39208	8.13367	8.1143	8.12827	8.57275	8.4985	8.70899	8.7418	8.65896	8.7436	8.33373	8.41207	8.0549	8.40123	FALSE	0	0.00322697	0.0114	0.392	0.00221798	0.0127	-0.413	0.853347	0.941	-0.0209	-0.0874	-0.0946	-0.115	0.297	TRUE	TRUE	FALSE	TRUE
Q8BIF2	Rbfox3	8.15807	8.20299	8.22323	8.38299	8.35411	8.19114	8.18444	8.11399	7.49778	7.59551	7.50418	7.91337	7.93856	8.1037	8.16146	7.89074	FALSE	0	1.01e-05	0.000119	-0.614	0.00071965	0.00529	0.396	0.0325637	0.157	-0.218	0.185	0.216	-0.0024	-0.398	TRUE	TRUE	FALSE	TRUE
Q8BHR8		6.79009	6.9973	7.289	7.25265	6.88318	7.31861	7.13296	7.05949	6.75857	6.54353	6.23359	6.41917	7.22236	7.05663	7.10205	6.98464	FALSE	0	0.000338244	0.00191	-0.594	0.000294789	0.00266	0.603	0.94328	0.981	0.00916	0.158	0.142	0.151	-0.452	TRUE	TRUE	FALSE	TRUE
Q8BHJ7	Gabra5	10.2589	10.3516	10.3076	10.5229	10.2006	10.3788	10.5147	10.4715	10.0453	10.0822	9.95799	10.1579	10.4047	10.4164	10.3332	10.304	FALSE	0	0.000837393	0.00391	-0.299	0.000744015	0.00543	0.304	0.952486	0.984	0.0043	0.0971	0.066	0.0703	-0.233	TRUE	TRUE	FALSE	TRUE
Q8BHI7	Elovl5	8.67217	8.47971	8.62864	8.66374	8.68263	8.87277	8.84177	8.71205	9.40646	9.27779	9.388	9.19997	8.75058	8.65553	8.54769	8.90634	FALSE	0	2.09e-07	6.04e-06	0.707	1.41e-06	4.44e-05	-0.603	0.192345	0.434	0.104	-0.0781	-0.244	-0.14	0.463	TRUE	TRUE	FALSE	TRUE
Q8BHG9	Cggbp1	5.31898	5.6104	5.56486	5.56748	6.10586	6.07641	6.16581	5.89984	5.94057	5.82954	5.79477	5.85504	5.71572	5.53921	5.65802	5.40894	FALSE	0	0.000677578	0.00329	0.34	0.00348476	0.0181	-0.275	0.420569	0.658	0.065	0.309	-0.238	-0.173	0.102	TRUE	TRUE	FALSE	TRUE
Q8BHE3	Atcay	10.3422	10.5079	10.6262	10.5958	10.6226	10.6399	10.5597	10.4191	10.2219	10.2976	10.1729	10.3117	10.5724	10.5123	10.488	10.5681	FALSE	0	0.000796486	0.00375	-0.267	0.000469304	0.00379	0.284	0.788668	0.905	0.0172	0.0942	0.0519	0.0691	-0.215	TRUE	TRUE	FALSE	TRUE
Q8BH86	Dglucy	8.51476	8.41851	8.413	8.31839	8.29165	8.3432	8.37477	8.41995	8.70236	8.77697	8.67642	8.71295	8.4956	8.47564	8.41642	8.3352	FALSE	0	1.77e-05	0.000183	0.301	2.98e-05	0.000455	-0.286	0.763829	0.891	0.0146	-0.123	-0.0642	-0.0496	0.237	TRUE	TRUE	FALSE	TRUE
Q8BH50		8.21713	8.37375	8.08422	8.44177	8.05327	8.16136	8.28235	8.27428	7.81174	7.44067	7.89141	7.47306	8.26376	8.25555	8.41414	8.26784	FALSE	0	2.99e-05	0.000279	-0.625	2.11e-05	0.000357	0.646	0.841641	0.933	0.0211	0.0862	0.173	0.194	-0.452	TRUE	TRUE	FALSE	TRUE
Q8BGZ1	Hpcal4	12.0642	12.168	12.1156	12.1541	12.2578	12.2311	12.1309	12.1765	11.8376	11.7508	11.7816	11.7902	12.0348	12.1678	12.1983	12.2539	FALSE	0	4.07e-06	5.99e-05	-0.335	1.17e-06	3.85e-05	0.374	0.422825	0.659	0.0382	0.13	0.0559	0.0941	-0.28	TRUE	TRUE	FALSE	TRUE
Q8BGY4	Klhl26	6.46646	6.56239	6.65388	6.38096	6.48358	6.32437	6.52954	6.74649	6.17753	6.49377	5.98648	6.20285	6.74964	6.42803	6.46357	6.55605	FALSE	0	0.0159516	0.0413	-0.301	0.00873501	0.0367	0.334	0.765611	0.892	0.0334	0.0706	0.0656	0.099	-0.235	TRUE	TRUE	FALSE	TRUE
Q8BGT6	Micall1	8.08337	8.41149	8.30567	8.20804	8.40909	8.24831	8.15278	8.17791	8.53778	8.58341	8.59969	8.58841	8.20465	8.25413	8.25196	8.2061	FALSE	0	0.000177103	0.00117	0.325	9.22e-05	0.00109	-0.348	0.727685	0.869	-0.0229	-0.0794	-0.0743	-0.0972	0.251	TRUE	TRUE	FALSE	TRUE
Q8BGT5	Gpt2	9.27474	9.25586	9.32202	9.31057	9.41727	9.29269	9.40984	9.50721	9.64406	9.73237	9.685	9.78043	9.46072	9.49532	9.33619	9.26819	FALSE	0	2.17e-06	3.63e-05	0.42	4.14e-05	0.000585	-0.32	0.0915765	0.284	0.0993	-0.0428	-0.159	-0.0594	0.261	TRUE	TRUE	FALSE	TRUE
Q8BGN8	Synpr	10.984	11.0698	10.5318	10.9756	10.7559	11.1084	10.7154	10.9213	10.1201	9.88977	10.0992	10.1015	10.372	10.6584	10.9582	10.7026	FALSE	0	1.81e-05	0.000186	-0.838	0.000347006	0.00299	0.62	0.122873	0.335	-0.218	0.253	0.268	0.05	-0.57	TRUE	TRUE	FALSE	TRUE
Q8BG89	Znf365	7.38305	7.46946	7.57492	7.49749	7.55841	7.5225	7.40365	7.64392	6.99924	6.94299	6.97084	6.73091	7.22406	7.36288	7.34226	7.28869	FALSE	0	4.37e-07	1.09e-05	-0.57	2.89e-05	0.000446	0.393	0.0166248	0.111	-0.177	0.225	0.174	-0.00273	-0.396	TRUE	TRUE	FALSE	TRUE
Q8BG16	Slc6a15	8.625	8.64515	8.50369	8.60913	8.50846	8.33021	8.40135	8.44434	8.25359	8.13304	8.25524	8.26291	8.53162	8.37558	8.63888	8.48577	FALSE	0	1.3e-05	0.000144	-0.37	0.000200245	0.00197	0.282	0.143654	0.365	-0.0878	-0.0167	0.158	0.0702	-0.212	TRUE	TRUE	FALSE	TRUE
Q810C0	Slitrk2	8.18401	8.0985	8.10352	7.92356	8.41899	7.95588	8.09595	8.06457	7.66895	7.56099	7.36321	7.51512	7.73754	7.68902	8.08713	8.19547	FALSE	0	0.000421653	0.00228	-0.55	0.00492115	0.0237	0.4	0.232221	0.48	-0.15	0.217	0.161	0.0109	-0.389	TRUE	TRUE	FALSE	TRUE
Q80ZD8	Amigo1	7.40462	7.42165	7.34615	7.58422	7.22551	7.23197	7.15635	7.43613	6.66194	6.67481	6.96454	7.20476	7.48187	7.27008	7.14638	7.04147	FALSE	0	0.000312808	0.0018	-0.563	0.00918897	0.0381	0.358	0.107659	0.31	-0.204	0.0592	0.236	0.0317	-0.327	TRUE	TRUE	FALSE	TRUE
Q80Z24	Negr1	10.5725	10.5187	10.4588	10.5458	10.292	10.5111	10.379	10.4047	10.1978	9.94161	10.4062	10.315	10.6404	10.5828	10.6185	10.5822	FALSE	0	0.00135076	0.00573	-0.309	0.000177516	0.00181	0.391	0.308596	0.556	0.082	-0.0387	0.0885	0.171	-0.22	TRUE	TRUE	FALSE	TRUE
Q80YQ2	Med23	7.02253	6.79735	6.80921	6.73071	6.7813	6.67436	6.79143	6.95537	6.4738	6.70649	6.43408	6.38798	6.64724	6.8395	6.95751	6.93909	FALSE	0	0.0018767	0.00741	-0.339	0.00164637	0.0101	0.345	0.948229	0.983	0.00588	0.0539	0.0932	0.0991	-0.246	TRUE	TRUE	FALSE	TRUE
Q80YA9	Cnksr2	9.80339	9.9179	9.88023	9.94721	9.97416	10.0292	10.0298	9.94237	9.55256	9.58153	9.47519	9.51575	9.84771	9.91562	9.9221	9.98049	FALSE	0	4.66e-07	1.14e-05	-0.356	1.78e-07	9.71e-06	0.385	0.484844	0.713	0.0293	0.162	0.055	0.0843	-0.301	TRUE	TRUE	FALSE	TRUE
Q80Y17	Llgl1	9.40765	9.5108	9.39975	9.49723	9.43679	9.42784	9.32924	9.35292	9.75081	9.77517	9.75573	9.78278	9.39972	9.38558	9.42327	9.38966	FALSE	0	3.82e-07	9.7e-06	0.312	5.26e-08	3.9e-06	-0.367	0.14555	0.368	-0.0543	-0.115	-0.0477	-0.102	0.265	TRUE	TRUE	FALSE	TRUE
Q80Y14	Glrx5	8.90988	8.90641	8.74217	8.90368	8.68857	8.56038	8.73422	8.7913	8.28184	8.33631	8.45317	8.4159	8.6538	8.50198	8.87774	8.84574	FALSE	0	1.93e-05	0.000197	-0.494	0.000560816	0.00435	0.348	0.0846957	0.273	-0.146	0.0309	0.203	0.0571	-0.291	TRUE	TRUE	FALSE	TRUE
Q80XU8	Lrfn4	6.97466	7.03492	6.86386	7.08005	6.88839	7.09677	6.74358	7.15671	6.63853	6.66465	6.73584	6.59336	6.99013	6.90351	7.14929	6.82876	FALSE	0	0.00205825	0.00797	-0.33	0.0032739	0.0172	0.31	0.81901	0.921	-0.0204	0.0749	0.0919	0.0715	-0.238	TRUE	TRUE	FALSE	TRUE
Q80XU3	Nucks1	4.46734	4.1447	4.99521	5.16583	5.33362	4.99878	4.14556	4.91429	3.24014	3.70792	4.55157	3.49297	4.82005	4.95337	4.16059	5.05324	FALSE	0	0.0103877	0.0293	-0.945	0.00744457	0.0323	0.999	0.869485	0.95	0.0535	0.339	0.184	0.238	-0.761	TRUE	TRUE	FALSE	TRUE
Q80XG9	Lrrtm4	7.3295	7.6472	7.59312	7.43374	7.63602	7.26554	7.43211	7.42072	6.77452	6.94833	6.98456	6.81946	7.29426	7.21212	7.25827	7.32531	FALSE	0	2.18e-06	3.63e-05	-0.619	0.000262518	0.00242	0.391	0.0135223	0.0982	-0.228	0.165	0.227	-0.000933	-0.392	TRUE	TRUE	FALSE	TRUE
Q80X90	Flnb	9.98229	9.90834	9.88137	9.93728	9.86111	9.86924	10.1055	10.0143	10.6392	10.6962	10.6237	10.6174	10.105	10.188	10.1169	10.0869	FALSE	0	9.44e-10	9.93e-08	0.717	6.03e-08	4.25e-06	-0.52	0.00158679	0.034	0.197	-0.202	-0.237	-0.0403	0.48	TRUE	TRUE	FALSE	TRUE
Q80WR1	Tspan18	8.01064	8.80494	7.69465	8.13724	7.81329	7.88943	7.60649	8.36609	7.06208	7.13428	7.12113	6.99869	7.68615	7.46383	8.3101	8.05235	FALSE	0	0.000257429	0.00156	-1.08	0.00304439	0.0163	0.799	0.225539	0.474	-0.284	0.159	0.402	0.119	-0.68	TRUE	TRUE	FALSE	TRUE
Q80WM5	Hapln3	6.52066	6.00777	6.32478	6.08176	6.10175	6.09547	5.92747	6.06234	6.69909	6.80038	6.89118	6.73912	6.40757	6.38188	6.3486	6.31914	FALSE	0	2.41e-05	0.000236	0.549	0.000340717	0.00297	-0.418	0.165152	0.396	0.131	-0.31	-0.123	0.00749	0.426	TRUE	TRUE	FALSE	TRUE
Q80VQ0	Aldh3b1	8.65444	8.95225	8.91392	8.78227	8.79725	8.71449	8.61233	8.71166	9.30065	9.25295	9.35083	9.35556	8.89665	9.00946	9.02556	8.92868	FALSE	0	1.28e-06	2.39e-05	0.489	5.06e-05	0.00069	-0.35	0.038587	0.173	0.139	-0.245	-0.128	0.0114	0.361	TRUE	TRUE	FALSE	TRUE
Q80VP1	Epn1	11.8594	11.7185	11.6018	11.9816	11.6723	11.8383	11.7353	11.6781	11.5161	11.4469	11.6257	11.499	11.8091	11.8171	11.9172	11.8576	FALSE	0	0.00181564	0.00722	-0.268	0.000343513	0.00299	0.328	0.406733	0.647	0.0599	0.00762	0.0669	0.127	-0.201	TRUE	TRUE	FALSE	TRUE
Q80UP5	Ankrd13a	7.937	7.72305	7.84836	7.82045	7.82886	7.84951	7.66567	7.77638	8.10322	8.19571	8.2708	8.24887	7.69974	7.94398	7.92741	7.89012	FALSE	0	3.81e-05	0.000336	0.372	9.68e-05	0.00112	-0.339	0.608965	0.8	0.0331	-0.14	-0.0884	-0.0553	0.284	TRUE	TRUE	FALSE	TRUE
Q80U40	Rimbp2	10.9217	10.9678	10.966	11.0991	10.9754	10.9276	10.9718	10.8161	10.605	10.5738	10.6032	10.6246	10.8668	10.8342	10.9778	10.8959	FALSE	0	8.45e-07	1.74e-05	-0.387	2.02e-05	0.000344	0.292	0.0610541	0.23	-0.095	0.0711	0.137	0.042	-0.25	TRUE	TRUE	FALSE	TRUE
Q80TL4	Phf24	12.3997	12.3051	12.2524	12.2168	12.2417	12.2682	12.1559	12.2282	11.934	11.8403	11.9138	11.862	12.0772	12.0934	12.2375	12.2106	FALSE	0	7.3e-07	1.58e-05	-0.406	7.26e-05	0.000906	0.267	0.0122621	0.0925	-0.139	0.0837	0.154	0.0149	-0.252	TRUE	TRUE	FALSE	TRUE
Q80TH2	Erbin	9.77175	9.68402	9.56945	9.77127	9.54638	9.78153	9.76134	9.72648	10.1889	10.2172	10.2188	10.1996	9.72956	9.7508	9.71791	9.69724	FALSE	0	1.45e-07	4.63e-06	0.507	2.68e-07	1.33e-05	-0.482	0.64683	0.826	0.0248	-0.129	-0.134	-0.109	0.373	TRUE	TRUE	FALSE	TRUE
Q80SU7	Gvin1	6.91995	7.24122	6.9194	6.94254	6.74466	7.09826	7.18843	7.28186	7.53887	7.63886	7.47092	7.61849	7.10749	7.02859	6.9556	6.98243	TRUE	5	6.53e-05	0.000521	0.561	8.2e-05	0.000991	-0.548	0.900845	0.962	0.0127	-0.089	-0.162	-0.149	0.399	TRUE	TRUE	FALSE	TRUE
Q7TSY6	Celf4	8.54222	8.54955	8.41768	8.4119	8.36668	8.54291	8.18212	8.51596	8.01948	7.98801	8.20179	7.66017	8.31201	8.11176	8.33361	8.40561	FALSE	0	0.000244501	0.00149	-0.513	0.00830626	0.0353	0.323	0.0936679	0.287	-0.19	0.117	0.195	0.00566	-0.318	TRUE	TRUE	FALSE	TRUE
Q7TSK3	Pcdh8	6.81695	6.86133	6.60892	6.89944	6.56057	6.70595	6.53853	6.64829	6.36047	6.2952	6.31859	6.25948	6.77066	6.72159	6.71157	6.5491	FALSE	0	2.33e-06	3.85e-05	-0.488	3.63e-05	0.000532	0.38	0.113198	0.32	-0.108	0.0117	0.195	0.0866	-0.293	TRUE	TRUE	FALSE	TRUE
Q7TQF7	Amph	13.6883	13.7153	13.7723	13.8659	13.867	13.8544	13.8338	13.6971	13.4366	13.447	13.5045	13.4612	13.8043	13.7218	13.846	13.8326	FALSE	0	1.94e-05	0.000198	-0.298	4.79e-06	0.000116	0.339	0.405384	0.646	0.0407	0.104	0.0512	0.0919	-0.247	TRUE	TRUE	FALSE	TRUE
Q7TQD2	Tppp	13.7389	13.5688	13.4491	13.6207	13.2977	13.5746	13.3272	13.4611	13.126	13.1521	13.1261	13.1687	13.4149	13.4246	13.5836	13.5283	FALSE	0	9.82e-06	0.000116	-0.451	0.000154473	0.00163	0.345	0.136355	0.355	-0.107	0.00499	0.184	0.0777	-0.267	TRUE	TRUE	FALSE	TRUE
Q7TPD3	Robo2	9.63348	9.59241	9.4909	9.61676	9.53967	9.54628	9.59498	9.59221	9.25515	9.25438	9.26044	9.30769	9.46053	9.5605	9.59605	9.59155	FALSE	0	1.28e-06	2.39e-05	-0.314	4.28e-06	0.000108	0.283	0.439142	0.672	-0.0312	0.075	0.0901	0.0588	-0.224	TRUE	TRUE	FALSE	TRUE
Q7TNR6	Igsf21	6.75944	7.15434	7.03891	7.08038	6.98571	6.67013	6.63723	6.71629	6.47987	6.54719	6.65639	6.61262	7.04791	6.74665	6.90771	6.97174	FALSE	0	0.000369822	0.00205	-0.434	0.00241556	0.0136	0.344	0.353107	0.599	-0.0898	-0.0609	0.195	0.105	-0.239	TRUE	TRUE	FALSE	TRUE
Q7TNI2	Tmem59l	7.10495	7.18969	7.29902	7.32796	7.1237	7.63135	7.31855	7.36191	6.82306	6.54775	5.58232	6.60088	7.29751	6.93171	7.34151	6.99406	FALSE	0	0.00115657	0.00506	-0.842	0.0027098	0.0149	0.753	0.673769	0.843	-0.0892	0.329	0.201	0.111	-0.641	TRUE	TRUE	FALSE	TRUE
Q7TNE1	Sugct	7.1759	7.17263	7.24754	6.78142	7.00426	7.02797	7.16676	7.37747	7.47146	7.6281	7.56307	7.58712	7.11504	7.05964	7.03111	7.05517	FALSE	0	0.000212506	0.00135	0.468	0.00012021	0.00134	-0.497	0.763048	0.891	-0.0291	-0.0724	-0.122	-0.151	0.346	TRUE	TRUE	FALSE	TRUE
Q7TME0	Plppr4	10.7048	10.8429	10.5697	10.8446	10.6554	10.8156	10.6908	10.8427	10.0479	10.1531	10.0159	10.2678	10.5246	10.5012	10.6146	10.6553	FALSE	0	5.52e-07	1.28e-05	-0.619	1.94e-05	0.000335	0.453	0.0364387	0.168	-0.167	0.204	0.194	0.0272	-0.425	TRUE	TRUE	FALSE	TRUE
Q7M6Z0	Rtn4rl2	8.73248	9.04551	8.80752	9.04229	9.13397	9.05156	8.93024	9.10392	8.40532	8.49303	8.54619	8.56352	8.81641	8.99859	8.77691	8.90183	FALSE	0	9.66e-05	0.000715	-0.405	0.000219368	0.00211	0.371	0.663732	0.837	-0.0335	0.221	0.0726	0.0391	-0.332	TRUE	TRUE	FALSE	TRUE
Q76KF0	Sema6d	7.09835	6.97732	7.34271	7.29862	7.32765	7.43483	7.52758	7.24377	7.54042	7.61034	7.5555	7.53819	7.40314	7.45472	7.06134	7.21766	FALSE	0	0.00114606	0.00502	0.382	0.0105611	0.0423	-0.277	0.282863	0.532	0.105	0.0314	-0.173	-0.0678	0.209	TRUE	TRUE	FALSE	TRUE
Q6X893	Slc44a1	10.6883	11.2196	10.9895	10.7495	11.1498	10.7513	10.7175	10.9624	11.4285	11.5024	11.399	11.421	11.1151	11.0494	11.184	11.1456	FALSE	0	0.00023998	0.00147	0.526	0.0113066	0.0448	-0.314	0.0697157	0.245	0.212	-0.197	-0.18	0.0315	0.346	TRUE	TRUE	FALSE	TRUE
Q6WQJ1	Dagla	9.53617	9.58342	9.35287	9.40102	9.5167	9.61252	9.59982	9.58535	9.02455	8.98353	8.93533	9.08125	9.37474	9.31388	9.48852	9.536	FALSE	0	1.67e-06	2.94e-05	-0.462	4.72e-06	0.000115	0.422	0.508372	0.729	-0.0401	0.208	0.098	0.0579	-0.364	TRUE	TRUE	FALSE	TRUE
Q6VNS1	Ntrk3	9.55347	9.42621	9.3404	9.42049	9.25036	9.32013	9.4432	9.32387	9.05662	9.04678	9.01566	9.13088	9.24905	9.27663	9.44143	9.3589	FALSE	0	9.4e-06	0.000112	-0.373	0.000251553	0.00233	0.269	0.0826669	0.269	-0.104	0.0435	0.144	0.0406	-0.228	TRUE	TRUE	FALSE	TRUE
Q6URW6	Myh14	10.0157	9.98439	9.90715	9.92331	9.97537	9.94111	10.0353	9.96775	10.3992	10.4158	10.4004	10.3342	9.98701	10.1211	10.0762	10.1436	FALSE	0	3.68e-08	1.55e-06	0.43	2.33e-06	6.73e-05	-0.305	0.00784651	0.074	0.124	-0.122	-0.144	-0.0198	0.286	TRUE	TRUE	FALSE	TRUE
Q6PIX5	Rhbdf1	7.07478	6.83439	6.82268	6.61352	6.49217	6.68794	6.8366	6.11105	7.09682	7.25008	7.45297	7.22681	6.79978	6.77017	6.73154	7.07063	FALSE	0	0.00942193	0.027	0.42	0.0103604	0.0417	-0.414	0.962578	0.988	0.00669	-0.335	-0.0307	-0.024	0.39	TRUE	TRUE	FALSE	TRUE
Q6PIE5	Atp1a2	13.9911	14.0587	13.994	14.0142	14.048	14.018	14.0352	14.0277	14.2999	14.3042	14.256	14.345	14.0355	13.9913	14.0426	14.0566	FALSE	0	1.19e-07	3.99e-06	0.287	2.52e-07	1.27e-05	-0.27	0.572649	0.777	0.017	-0.0626	-0.0804	-0.0634	0.206	TRUE	TRUE	FALSE	TRUE
Q6PHZ8	Kcnip4	7.79913	7.86413	8.09773	8.06774	8.13554	7.95641	8.01611	7.73302	7.56741	7.59626	7.43927	7.69132	7.89873	7.86105	7.88301	7.87022	FALSE	0	0.000426655	0.0023	-0.384	0.00269475	0.0149	0.305	0.362824	0.609	-0.0789	0.118	0.115	0.0359	-0.269	TRUE	TRUE	FALSE	TRUE
Q6PH08	Erc2	9.15205	9.16356	9.13778	9.11929	9.15142	9.17862	9.20016	9.18588	8.72061	8.77144	8.76625	8.76735	9.09818	9.05739	9.06278	9.11015	FALSE	0	8.9e-10	9.65e-08	-0.387	8.46e-09	9.76e-07	0.326	0.0409752	0.18	-0.061	0.139	0.103	0.0419	-0.284	TRUE	TRUE	FALSE	TRUE
Q6PE13	Prrt3	8.6413	8.72266	8.54604	8.71081	8.42192	8.56784	8.52226	8.44434	8.14409	8.08471	8.01967	8.17591	8.55981	8.40616	8.61156	8.37847	FALSE	0	2.56e-07	7.08e-06	-0.549	1.63e-05	0.00029	0.383	0.0149057	0.103	-0.166	0.0542	0.22	0.0542	-0.329	TRUE	TRUE	FALSE	TRUE
Q6PDH0	Phldb1	9.3117	9.32598	9.18156	9.2097	8.90934	9.14594	9.04324	9.08841	9.50944	9.56168	9.45588	9.55409	9.17375	9.30194	9.2972	9.16491	FALSE	0	0.000277737	0.00164	0.263	0.000127983	0.00141	-0.286	0.684026	0.849	-0.0228	-0.218	-0.00743	-0.0302	0.256	TRUE	TRUE	FALSE	TRUE
Q6PB70	Ano8	7.54924	7.31777	7.42641	7.34572	7.37941	7.27943	7.09483	7.24684	7.09847	6.87791	7.23606	7.22279	7.29124	7.42693	7.448	7.37656	FALSE	0	0.00229461	0.00867	-0.301	0.00414976	0.0208	0.277	0.770665	0.894	-0.0241	-0.0385	0.121	0.0971	-0.18	TRUE	TRUE	FALSE	TRUE
Q6P9K9	Nrxn3	9.91329	9.89016	9.87888	9.94682	9.92976	9.86461	9.89922	9.91267	9.55928	9.55713	9.59823	9.59678	9.90233	9.86053	9.89854	9.85742	FALSE	0	1.38e-08	7.28e-07	-0.329	4.22e-08	3.25e-06	0.302	0.349709	0.597	-0.0276	0.085	0.0907	0.0631	-0.239	TRUE	TRUE	FALSE	TRUE
Q6P9J9	Ano6	6.50645	6.66008	6.37062	6.62994	6.85871	6.69189	6.88636	6.78863	7.02178	7.15216	6.98253	7.14892	6.40844	6.49831	6.67988	6.44511	FALSE	0	4.35e-06	6.3e-05	0.535	2.16e-06	6.3e-05	-0.568	0.655638	0.832	-0.0338	0.0733	-0.191	-0.225	0.343	TRUE	TRUE	FALSE	TRUE
Q6P8J2	Sat2	7.02588	7.26179	6.91568	6.81722	6.9054	6.95287	6.88266	7.35505	7.20602	7.49456	7.29343	7.48901	7.11609	6.84311	6.86314	7.13832	TRUE	2	0.00889643	0.0259	0.366	0.00694579	0.0307	-0.381	0.902934	0.963	-0.015	-0.0735	-0.0924	-0.107	0.273	TRUE	TRUE	FALSE	TRUE
Q6P5U7	Nwd2	8.85143	8.90813	8.92344	8.85025	8.96731	8.84226	8.9296	8.95663	8.41528	8.42229	8.42996	8.44524	8.74997	8.71898	8.75957	8.78251	FALSE	0	1.53e-09	1.44e-07	-0.455	1.17e-07	6.93e-06	0.325	0.00150386	0.0327	-0.131	0.177	0.136	0.0057	-0.319	TRUE	TRUE	FALSE	TRUE
Q6P1D5	Sez6l	9.75767	9.73871	9.79711	9.83255	9.882	9.80437	9.84782	9.71675	9.48187	9.34042	9.42844	9.41806	9.64962	9.72295	9.67957	9.7586	FALSE	0	6.63e-07	1.47e-05	-0.364	1.08e-05	0.000214	0.285	0.0882829	0.279	-0.0788	0.134	0.103	0.0242	-0.261	TRUE	TRUE	FALSE	TRUE
Q6NXH9	Krt73	12.0176	11.9965	12.4837	11.7382	11.959	11.8664	11.8899	12.481	12.9389	12.9956	12.6764	12.7283	11.97	12.1976	12.0169	12.0236	FALSE	0	0.000164463	0.00111	0.776	0.000151089	0.0016	-0.783	0.964129	0.988	-0.007	-0.2	-0.19	-0.197	0.586	TRUE	TRUE	FALSE	TRUE
Q6NTA4	Rragb	9.06901	9.1734	9.10741	9.20153	8.91354	8.67446	8.89372	9.19512	8.69587	8.84605	8.77893	8.60514	8.94894	9.14057	9.30873	9.01293	FALSE	0	0.000959337	0.00438	-0.406	0.00194398	0.0115	0.371	0.725552	0.869	-0.035	-0.0536	0.165	0.13	-0.241	TRUE	TRUE	FALSE	TRUE
Q6NSR8	Npepl1	7.42371	7.29432	7.29169	7.23812	7.24121	7.20187	7.46118	7.34451	7.5896	7.83208	7.7205	7.75403	7.44784	7.43095	7.39161	7.42167	FALSE	0	9.29e-06	0.000112	0.412	0.000223413	0.00214	-0.301	0.0912989	0.284	0.111	-0.131	-0.131	-0.0198	0.281	TRUE	TRUE	FALSE	TRUE
Q6NS60	Fbxo41	11.0712	11.1827	11.1178	11.1008	11.0907	11.1642	11.2521	11.2031	10.662	10.63	10.6906	10.6751	11.0552	10.9338	10.9809	11.0344	FALSE	0	2.03e-08	9.65e-07	-0.454	8.14e-07	2.94e-05	0.337	0.0117291	0.0909	-0.117	0.187	0.128	0.0108	-0.326	TRUE	TRUE	FALSE	TRUE
Q6IRU5	Cltb	9.65798	9.41091	9.25809	9.31155	8.97117	9.01556	8.81517	9.05856	9.02295	8.80918	8.96102	8.92827	9.18718	9.29959	9.65981	9.48251	FALSE	0	0.000346504	0.00195	-0.479	0.000362079	0.0031	0.477	0.981916	0.993	-0.00236	-0.213	0.232	0.229	-0.248	TRUE	TRUE	FALSE	TRUE
Q6IMP4	Panx2	6.94861	7.048	7.07227	6.72645	6.96705	6.87567	6.94329	7.03442	6.65254	6.52398	6.6379	6.68781	6.86824	6.86136	6.92685	6.95242	FALSE	0	0.000229594	0.00142	-0.323	0.000889804	0.00625	0.277	0.491622	0.717	-0.0466	0.0972	0.0909	0.0443	-0.232	TRUE	TRUE	FALSE	TRUE
Q6IEE6	Tmem132e	7.64878	7.55782	7.49386	7.29444	7.48159	7.46223	7.61266	7.77459	7.18984	7.10031	7.14331	7.19458	7.52318	7.6005	7.56913	7.54647	FALSE	0	0.000382499	0.00211	-0.342	8.21e-05	0.000991	0.403	0.421812	0.658	0.0611	0.133	0.0491	0.11	-0.293	TRUE	TRUE	FALSE	TRUE
Q6GQT6	Scap	6.92897	7.09103	6.95424	6.65011	7.16876	6.98394	7.18934	6.85835	6.46205	6.00801	6.65582	5.65067	6.79528	6.96678	6.87061	6.75579	FALSE	0	0.000968855	0.0044	-0.712	0.00190753	0.0113	0.653	0.736257	0.874	-0.059	0.301	0.157	0.0978	-0.555	TRUE	TRUE	FALSE	TRUE
Q68FD9	Kiaa1549	11.472	11.5197	11.5667	11.455	11.5346	11.501	11.5608	11.5209	11.1014	11.0863	11.1053	11.1479	11.4375	11.3603	11.4044	11.5194	FALSE	0	4.87e-08	1.94e-06	-0.393	6.08e-07	2.36e-05	0.32	0.0723553	0.25	-0.0729	0.136	0.11	0.0371	-0.283	TRUE	TRUE	FALSE	TRUE
Q68EF8	Rapgefl1	8.64608	8.70513	9.04447	8.95267	9.10296	8.80137	8.73829	8.77261	8.27806	8.37141	8.25111	8.36181	8.71273	8.67995	8.77136	8.57053	FALSE	0	5.93e-05	0.000483	-0.521	0.00135191	0.00862	0.368	0.119265	0.329	-0.153	0.181	0.165	0.0111	-0.357	TRUE	TRUE	FALSE	TRUE
Q68EF0	Rab3ip	8.91298	8.94482	8.75418	8.96436	8.80446	8.88587	8.97726	8.91454	8.63776	8.63512	8.67144	8.49607	8.91169	8.84542	8.97422	8.88619	FALSE	0	0.000132187	0.000923	-0.284	9.37e-05	0.0011	0.294	0.853319	0.941	0.0103	0.0695	0.0681	0.0784	-0.216	TRUE	TRUE	FALSE	TRUE
Q68ED7	Crtc1	8.66564	8.84837	8.71149	8.92638	8.81943	8.92861	8.98841	8.79297	8.55911	8.43265	8.5487	8.53534	8.86963	8.86316	8.85982	8.98782	FALSE	0	0.000586764	0.00293	-0.269	2.38e-05	0.000388	0.376	0.101055	0.3	0.107	0.111	0.0169	0.124	-0.252	TRUE	TRUE	FALSE	TRUE
Q68ED2	Grm7	11.224	11.1711	11.2015	11.2405	11.1227	11.1731	11.1795	11.208	10.7909	10.8464	10.6994	10.5672	10.9749	10.9606	10.9856	11.0387	FALSE	0	1.17e-07	3.95e-06	-0.483	0.000103128	0.00118	0.264	0.000560714	0.0204	-0.219	0.147	0.185	-0.0341	-0.298	TRUE	TRUE	FALSE	TRUE
Q64676	Ugt8	7.978	8.29847	8.19736	8.11335	8.30738	8.15109	8.25394	8.21425	8.53287	8.51674	8.51056	8.3881	8.05482	8.10312	7.90148	8.1897	FALSE	0	0.000258741	0.00156	0.34	2.95e-05	0.000453	-0.425	0.249719	0.498	-0.0845	-0.000287	-0.0852	-0.17	0.255	TRUE	TRUE	FALSE	TRUE
Q64669	Nqo1	9.08711	8.84961	8.5395	8.86523	8.59963	8.60997	8.89797	8.59906	9.33773	9.28022	9.28678	9.28402	8.86734	8.94956	8.98374	8.80899	FALSE	0	0.000237124	0.00146	0.462	0.000924407	0.00643	-0.395	0.490215	0.716	0.067	-0.251	-0.0925	-0.0255	0.369	TRUE	TRUE	FALSE	TRUE
Q64471	Gstt1	7.8847	7.78431	7.99779	7.83688	7.84528	7.80105	7.92373	7.96729	8.43777	8.42505	8.46758	8.42076	8.19184	8.14589	8.1008	8.04418	FALSE	0	1.81e-08	8.89e-07	0.562	1.63e-05	0.00029	-0.317	0.000217111	0.013	0.245	-0.195	-0.204	0.041	0.358	TRUE	TRUE	FALSE	TRUE
Q64444	Ca4	9.03405	8.88408	8.58544	8.87653	8.58611	8.73412	8.81927	8.70026	8.08289	7.82543	8.29049	8.28897	8.82183	8.91812	8.94928	8.94599	FALSE	0	6.31e-06	8.23e-05	-0.723	2.42e-06	6.95e-05	0.787	0.548863	0.759	0.0638	0.0635	0.199	0.262	-0.524	TRUE	TRUE	FALSE	TRUE
Q64435	Ugt1a6	7.90414	6.96461	7.25332	7.10994	7.2214	7.38101	7.32247	7.34578	8.68966	8.68427	8.74468	8.75592	7.74065	8.07331	7.62412	7.47894	FALSE	0	4.67e-07	1.14e-05	1.41	2.59e-05	0.000409	-0.989	0.0207761	0.123	0.421	-0.451	-0.46	-0.0391	0.95	TRUE	TRUE	FALSE	TRUE
Q64332	Syn2	14.3535	14.3914	14.3523	14.4213	14.4443	14.3858	14.4428	14.386	14.0323	14.0263	14.0845	14.035	14.3524	14.3879	14.3657	14.3987	FALSE	0	1.83e-08	8.89e-07	-0.335	2.09e-08	1.92e-06	0.332	0.908814	0.966	-0.00346	0.111	0.0759	0.0724	-0.259	TRUE	TRUE	FALSE	TRUE
Q64331	Myo6	10.679	10.661	10.6607	10.6067	10.5598	10.5987	10.5763	10.616	11.1245	11.1811	11.1596	11.1365	10.6326	10.6521	10.6661	10.6704	FALSE	0	4.6e-11	1.21e-08	0.499	5.05e-11	2.62e-08	-0.495	0.904983	0.965	0.00341	-0.174	-0.109	-0.106	0.389	TRUE	TRUE	FALSE	TRUE
Q64324	Stxbp2	6.63956	6.73826	6.41919	6.53161	6.66036	6.66245	6.74773	6.82863	7.19638	7.27025	7.10464	6.94623	6.75887	6.85878	6.70916	6.74373	FALSE	0	4.11e-06	6.01e-05	0.547	0.000285162	0.00259	-0.362	0.0278047	0.144	0.185	-0.0762	-0.219	-0.0334	0.328	TRUE	TRUE	FALSE	TRUE
Q64299	Ccn3	7.82294	7.58754	7.73953	7.75519	7.47634	7.65188	7.60634	7.57373	7.38247	7.16039	7.39485	7.47491	7.75699	7.67166	7.74977	7.70141	FALSE	0	5.15e-05	0.000429	-0.373	6.13e-05	0.000783	0.367	0.923983	0.973	-0.00634	-0.017	0.132	0.126	-0.241	TRUE	TRUE	FALSE	TRUE
Q640R3	Hepacam	11.7277	11.5929	11.6288	11.7132	11.586	11.7592	11.5691	11.6269	12.1884	12.078	12.0026	12.0746	11.614	11.7086	11.8597	11.7541	FALSE	0	4.95e-06	6.86e-05	0.42	3.38e-05	0.000502	-0.352	0.265768	0.513	0.0684	-0.145	-0.115	-0.0461	0.306	TRUE	TRUE	FALSE	TRUE
Q63810	Ppp3r1	11.9915	12.1668	12.1438	12.1389	12.3837	12.3824	12.2483	12.3475	11.8188	11.8599	11.6971	11.8995	12.1895	12.2552	12.3277	12.4122	FALSE	0	0.000195661	0.00126	-0.291	1.02e-06	3.46e-05	0.477	0.00664268	0.0671	0.186	0.199	-0.0312	0.155	-0.323	TRUE	TRUE	FALSE	TRUE
Q62443	Nptx1	12.0404	11.964	11.9224	11.9927	11.9899	11.9847	12.1364	11.9127	11.3938	11.2893	11.457	11.2361	11.9026	11.8009	11.9086	11.9353	FALSE	0	1.75e-08	8.72e-07	-0.636	1.29e-07	7.49e-06	0.543	0.119192	0.329	-0.093	0.202	0.176	0.0827	-0.46	TRUE	TRUE	FALSE	TRUE
Q62433	Ndrg1	11.0028	11.2955	11.2792	11.1994	11.2509	11.1685	11.0736	11.1144	11.5782	11.6503	11.6357	11.5766	11.2293	11.1592	11.1399	11.2705	FALSE	0	6.71e-06	8.64e-05	0.416	7.77e-06	0.000168	-0.41	0.928385	0.975	0.0055	-0.137	-0.0948	-0.0893	0.321	TRUE	TRUE	FALSE	TRUE
Q62425	Ndufa4	14.1851	14.1255	14.1185	14.1118	14.172	14.1321	13.9397	13.9029	13.9303	13.5077	13.9033	13.9056	14.0901	14.0975	14.1315	14.1059	FALSE	0	0.00167261	0.00676	-0.324	0.00333375	0.0175	0.295	0.733824	0.873	-0.029	0.0142	0.113	0.0838	-0.211	TRUE	TRUE	FALSE	TRUE
Q62419	Sh3gl1	9.96633	10.1295	10.0765	10.0684	10.1791	10.0685	10.0618	10.0612	9.76022	9.8179	9.73444	9.74208	9.95379	10.0469	10.0361	10.2119	FALSE	0	5.86e-05	0.000477	-0.297	5.48e-05	0.000729	0.299	0.970138	0.99	0.002	0.098	0.0655	0.0675	-0.231	TRUE	TRUE	FALSE	TRUE
Q62413	Epha6	8.34535	8.36061	8.33774	8.38209	8.40055	8.42679	8.54486	8.38065	8.13095	8.10199	8.07782	8.05131	8.31607	8.35393	8.37041	8.45096	FALSE	0	1.06e-05	0.000123	-0.266	5.45e-06	0.000127	0.282	0.688183	0.851	0.0164	0.124	0.0419	0.0583	-0.224	TRUE	TRUE	FALSE	TRUE
Q62192	Cd180	6.19321	6.07572	6.06714	6.26173	6.14389	6.34224	6.03526	6.0524	7.56983	7.52549	7.63678	7.53357	6.08252	6.37235	6.23227	6.30391	FALSE	0	1.67e-11	7.15e-09	1.42	4.45e-11	2.49e-08	-1.32	0.20528	0.45	0.0983	-0.383	-0.377	-0.279	1.04	TRUE	TRUE	FALSE	TRUE
Q62165	Dag1	9.96533	9.91324	9.92321	9.93585	9.86094	9.9105	9.96405	9.96316	10.2599	10.3599	10.1698	10.2616	9.93157	9.89005	9.89106	9.88152	FALSE	0	7.2e-07	1.57e-05	0.328	2.05e-07	1.1e-05	-0.364	0.374171	0.621	-0.0359	-0.0804	-0.0707	-0.107	0.258	TRUE	TRUE	FALSE	TRUE
Q62086	Pon2	7.93708	7.9358	8.12486	7.95651	7.97641	7.95176	8.00577	8.08621	8.35273	8.46028	8.39677	8.47617	8.15636	8.08958	7.98169	8.06489	FALSE	0	7.47e-07	1.6e-05	0.433	9.02e-06	0.000187	-0.348	0.123825	0.336	0.0846	-0.117	-0.133	-0.0489	0.299	TRUE	TRUE	FALSE	TRUE
Q62084	Ppp1r14b	7.31901	7.38935	7.34835	7.38069	7.44184	7.33171	7.44597	7.46125	7.80819	7.79869	7.8461	7.88884	7.39419	7.4518	7.4066	7.55233	FALSE	0	1.58e-08	8.12e-07	0.476	2.33e-07	1.2e-05	-0.384	0.0443851	0.19	0.0919	-0.0964	-0.157	-0.0653	0.319	TRUE	TRUE	FALSE	TRUE
Q62059	Vcan	11.4148	11.5002	11.4326	11.5716	11.4522	11.4899	11.3876	11.3958	11.8584	11.8715	11.8593	11.8838	11.5354	11.6275	11.6569	11.5823	FALSE	0	1.37e-07	4.45e-06	0.388	1.06e-05	0.000212	-0.268	0.00958431	0.0834	0.121	-0.164	-0.115	0.00553	0.273	TRUE	TRUE	FALSE	TRUE
Q61772	Epha7	6.88978	6.82609	6.83523	6.75491	6.83839	6.74452	6.91734	6.77082	6.22766	6.46169	6.28779	6.32007	6.47478	6.75027	6.53138	6.82426	FALSE	0	8.92e-06	0.000108	-0.502	0.000703036	0.00519	0.321	0.0286398	0.146	-0.181	0.164	0.173	-0.00826	-0.329	TRUE	TRUE	FALSE	TRUE
Q61739	Itga6	8.23744	8.17825	8.32496	8.20373	8.21523	8.21016	8.283	8.18109	8.61591	8.6164	8.48554	8.5662	8.07925	8.24731	8.12266	8.21083	FALSE	0	4.69e-06	6.66e-05	0.335	4.98e-07	2.06e-05	-0.406	0.151249	0.377	-0.0711	-0.0763	-0.0625	-0.134	0.272	TRUE	TRUE	FALSE	TRUE
Q61735	Cd47	14.508	14.3464	14.1181	14.3594	14.0685	14.2722	14.0427	14.2168	13.8396	13.6813	14.0543	13.9007	13.9803	14.1939	14.3615	14.2731	FALSE	0	0.000364488	0.00202	-0.464	0.0047929	0.0232	0.333	0.210679	0.456	-0.131	0.0115	0.194	0.0637	-0.27	TRUE	TRUE	FALSE	TRUE
Q61626	Grik5	8.2083	8.19631	8.22988	8.05619	8.01367	8.08261	8.03591	8.19661	7.56597	7.53396	7.58794	7.73857	8.00536	7.88603	8.03559	7.94608	FALSE	0	8.99e-08	3.23e-06	-0.566	1.68e-05	0.000296	0.362	0.00286867	0.0449	-0.204	0.125	0.215	0.0108	-0.351	TRUE	TRUE	FALSE	TRUE
Q61599	Arhgdib	9.59165	9.32774	9.50518	9.88982	9.34198	9.52342	9.66301	9.29022	10.1549	10.2528	10.2266	10.1918	9.7798	9.7247	9.63525	9.8994	FALSE	0	3.16e-05	0.00029	0.628	0.000769145	0.00558	-0.447	0.105428	0.306	0.181	-0.295	-0.171	0.00989	0.457	TRUE	TRUE	FALSE	TRUE
Q61586	Gpam	7.27165	7.07142	7.10069	6.81443	7.33654	7.16245	7.26687	7.40157	7.35221	7.48138	7.46532	7.33262	6.77436	6.95243	6.87078	7.15768	FALSE	0	0.00259399	0.00955	0.343	0.0001945	0.00193	-0.469	0.202566	0.446	-0.126	0.116	-0.111	-0.237	0.232	TRUE	TRUE	FALSE	TRUE
Q61576	Fkbp10	7.99577	7.71398	7.76032	7.81883	7.68664	7.8336	8.0853	7.75828	8.23175	8.21475	8.09232	8.12467	7.79128	7.93953	7.99415	7.86834	FALSE	0	0.000849552	0.00396	0.344	0.00540583	0.0256	-0.268	0.366356	0.612	0.0761	-0.0909	-0.11	-0.0335	0.234	TRUE	TRUE	FALSE	TRUE
Q61548	Snap91	14.806	14.7276	14.7117	14.837	14.7295	14.7256	14.7609	14.6074	14.4453	14.3556	14.4607	14.4007	14.6565	14.6378	14.7775	14.7018	FALSE	0	1.6e-06	2.84e-05	-0.355	2.43e-05	0.000393	0.278	0.10967	0.313	-0.0772	0.0595	0.124	0.0471	-0.231	TRUE	TRUE	FALSE	TRUE
Q61510	Trim25	6.65751	6.37977	6.51341	6.35275	6.48078	6.29	6.69371	6.42469	7.0017	7.01766	7.02472	7.01108	6.56982	6.57617	6.34828	6.5702	FALSE	0	1.44e-05	0.000156	0.538	3.27e-05	0.000492	-0.498	0.636187	0.818	0.0403	-0.147	-0.144	-0.103	0.394	TRUE	TRUE	FALSE	TRUE
Q61503	Nt5e	7.53258	6.85897	7.15255	7.38178	6.80438	6.93687	6.8676	6.88833	6.49054	6.07068	6.5428	6.64989	6.99545	7.33998	7.34762	6.48211	FALSE	0	0.000758559	0.0036	-0.793	0.00577763	0.0269	0.603	0.322747	0.571	-0.19	-0.0221	0.335	0.145	-0.458	TRUE	TRUE	FALSE	TRUE
Q61475	Cd55	8.66397	8.27735	8.37959	8.41571	8.00636	8.04891	8.10312	8.26149	8.1207	7.8728	7.85662	7.71533	8.17771	8.18494	8.33825	8.36934	FALSE	0	4.51e-05	0.000383	-0.543	0.00125863	0.00813	0.376	0.0969969	0.293	-0.167	-0.0695	0.26	0.093	-0.283	TRUE	TRUE	FALSE	TRUE
Q61474	Msi1	6.87125	6.76372	6.71832	6.97032	6.72399	6.87443	6.81361	6.93452	7.22742	7.28972	7.20741	7.01808	6.83116	6.81631	6.5989	6.91668	FALSE	0	0.000460784	0.00243	0.355	0.000174768	0.00179	-0.395	0.616158	0.807	-0.0401	-0.0744	-0.0801	-0.12	0.275	TRUE	TRUE	FALSE	TRUE
Q61425	Hadh	11.9055	11.7092	11.7262	11.5441	11.6051	11.6	11.6893	11.8169	12.0239	12.0456	12.0053	12.0685	11.635	11.8184	11.7588	11.7993	FALSE	0	0.000423427	0.00228	0.315	0.00103377	0.00697	-0.283	0.652442	0.83	0.0316	-0.119	-0.0757	-0.0441	0.239	TRUE	TRUE	FALSE	TRUE
Q61410	Prkg2	7.26478	7.07004	6.99909	6.94884	6.91558	6.87466	6.88414	6.64688	6.52877	6.48401	6.74087	6.85148	6.81404	6.92882	6.91742	7.02769	FALSE	0	0.000382565	0.00211	-0.419	0.00972426	0.0397	0.271	0.122956	0.335	-0.149	-0.0383	0.202	0.0534	-0.217	TRUE	TRUE	FALSE	TRUE
Q61263	Soat1	7.83247	7.641	7.75924	7.64391	7.71215	7.82655	7.89845	7.853	8.45428	8.45652	8.36182	8.43042	7.71645	7.81789	7.69246	7.70937	FALSE	0	1.52e-09	1.44e-07	0.707	2.02e-09	3.49e-07	-0.692	0.777312	0.898	0.0149	-0.103	-0.206	-0.191	0.5	TRUE	TRUE	FALSE	TRUE
Q61233	Lcp1	10.7568	10.8571	10.7774	10.8051	10.7133	10.8239	10.7923	10.8677	11.7197	11.7394	11.6241	11.7458	11.0088	10.9064	11.1056	10.9298	FALSE	0	2.38e-11	9.59e-09	0.908	5.47e-10	1.53e-07	-0.72	0.0016662	0.0348	0.189	-0.274	-0.274	-0.0857	0.634	TRUE	TRUE	FALSE	TRUE
Q61164	Ctcf	5.45846	5.74971	5.75084	5.68143	6.09217	6.40432	6.07326	6.33528	5.54229	5.03266	5.17284	5.4786	6.05329	5.9328	5.94894	6.21436	FALSE	0	0.00898127	0.0261	-0.354	2.02e-05	0.000344	0.731	0.00599009	0.0643	0.377	0.419	-0.147	0.23	-0.501	TRUE	TRUE	FALSE	TRUE
Q61137	Astn1	11.3684	11.4288	11.3729	11.4842	11.4353	11.4821	11.4512	11.4057	11.1136	11.0788	11.1786	11.1232	11.4232	11.3719	11.4855	11.4178	FALSE	0	1.55e-06	2.79e-05	-0.29	1e-06	3.43e-05	0.301	0.769152	0.893	0.011	0.0923	0.0623	0.0733	-0.228	TRUE	TRUE	FALSE	TRUE
Q61127	Nab2	7.46137	7.33137	7.20751	7.45219	7.54374	7.36656	7.55525	7.12588	6.99782	6.8842	7.03897	6.69761	7.0696	7.1717	7.19831	7.33269	FALSE	0	0.000422802	0.00228	-0.458	0.0120623	0.0471	0.288	0.111642	0.317	-0.17	0.183	0.148	-0.0216	-0.31	TRUE	TRUE	FALSE	TRUE
Q60953	Pml	6.35187	6.43025	6.40779	6.53753	6.62193	6.7741	6.83337	6.51841	6.94914	7.01064	7.01989	6.92387	6.66101	6.63201	6.33698	6.59652	FALSE	0	5.35e-06	7.28e-05	0.544	8.36e-05	0.001	-0.419	0.127224	0.341	0.125	0.0241	-0.231	-0.106	0.313	TRUE	TRUE	FALSE	TRUE
Q60866	Pter	6.62925	6.68337	6.89163	6.52972	6.58966	6.73786	6.90306	6.72736	6.95512	7.22334	6.98565	7.03927	6.84046	6.72591	6.55783	6.74185	FALSE	0	0.000914096	0.00421	0.367	0.00191579	0.0114	-0.334	0.712915	0.862	0.033	-0.0581	-0.114	-0.0811	0.253	TRUE	TRUE	FALSE	TRUE
Q60823	Akt2	6.57578	7.04446	7.01044	6.75953	7.44904	6.94476	6.7114	6.89231	7.21792	7.36739	7.23212	7.36929	6.87285	6.43954	6.87523	6.84622	FALSE	0	0.00879911	0.0257	0.449	0.00264403	0.0147	-0.538	0.556408	0.764	-0.0891	0.0239	-0.128	-0.217	0.321	TRUE	TRUE	FALSE	TRUE
Q60772	Cdkn2c	7.35198	7.32915	7.40826	7.18914	7.21866	7.14204	7.53636	7.08152	7.85397	7.8423	7.85662	7.92344	7.35824	7.2811	7.12094	7.47267	FALSE	0	2.87e-05	0.00027	0.549	2.32e-05	0.000381	-0.561	0.901904	0.962	-0.0114	-0.191	-0.116	-0.127	0.434	TRUE	TRUE	FALSE	TRUE
Q60770	Stxbp3	9.08376	9.1104	8.95896	9.08208	9.00248	9.0594	8.94051	9.11181	9.51444	9.57273	9.45856	9.41876	8.9766	9.12631	9.16573	9.11728	FALSE	0	9.83e-07	1.95e-05	0.432	2.84e-06	7.76e-05	-0.395	0.487206	0.714	0.0377	-0.14	-0.11	-0.0723	0.322	TRUE	TRUE	FALSE	TRUE
Q60766	Irgm1	6.77778	6.94648	6.68245	6.67141	6.49447	6.6966	6.99566	6.88884	7.97503	8.06285	7.78718	8.04797	6.95415	6.98266	6.95082	7.11114	FALSE	0	7.18e-09	4.69e-07	1.2	1.08e-07	6.71e-06	-0.969	0.0349144	0.164	0.23	-0.358	-0.357	-0.127	0.842	TRUE	TRUE	FALSE	TRUE
Q60710	Samhd1	8.29748	8.28818	8.33535	8.21144	8.35157	8.35262	8.39133	8.38814	8.77662	8.85436	8.73232	8.81328	8.30897	8.35699	8.30796	8.40424	FALSE	0	1.34e-09	1.33e-07	0.511	7.18e-09	8.7e-07	-0.45	0.118895	0.329	0.0614	-0.0773	-0.165	-0.104	0.346	TRUE	TRUE	FALSE	TRUE
Q60603	Kcnh1	7.77447	7.58966	7.65164	7.74346	7.51473	8.06096	7.87627	7.95773	8.14825	8.08786	7.95535	7.98213	7.75496	7.71784	7.79184	7.44934	FALSE	0	0.00412502	0.0139	0.354	0.00331602	0.0174	-0.365	0.914465	0.968	-0.0113	0.0364	-0.126	-0.138	0.227	TRUE	TRUE	FALSE	TRUE
Q5SYD0	Myo1d	9.84021	10.1127	10.0289	9.96713	10.0348	9.84126	9.79924	9.95346	10.4766	10.5107	10.488	10.4677	10.0775	10.106	10.1474	10.0928	FALSE	0	4.64e-07	1.14e-05	0.498	1.06e-05	0.000212	-0.38	0.0566293	0.22	0.119	-0.214	-0.134	-0.0156	0.364	TRUE	TRUE	FALSE	TRUE
Q5SSZ5	Tns3	8.63966	8.42482	8.6138	8.60451	8.43393	8.53206	8.58265	8.50452	9.10121	8.96292	9.04587	9.04573	8.59486	8.65521	8.73046	8.6974	FALSE	0	2.87e-07	7.81e-06	0.468	4.64e-06	0.000114	-0.369	0.0761704	0.257	0.0988	-0.185	-0.127	-0.0286	0.341	TRUE	TRUE	FALSE	TRUE
Q5RKR3	Islr2	8.63128	8.66644	8.66935	8.70762	8.67505	8.78925	8.81335	8.52817	8.26427	8.2423	8.15424	8.15532	8.37681	8.45912	8.50649	8.63593	FALSE	0	3.58e-06	5.38e-05	-0.465	0.00041984	0.00349	0.291	0.0157457	0.107	-0.174	0.184	0.151	-0.0226	-0.313	TRUE	TRUE	FALSE	TRUE
Q5GH67	Xkr4	9.47992	9.33909	9.26074	9.23852	9.05648	9.37439	9.13656	9.37241	8.77104	8.77079	8.71185	8.81248	9.06748	9.20032	8.95076	9.32635	FALSE	0	1.44e-05	0.000156	-0.563	0.000808428	0.0058	0.37	0.0434904	0.188	-0.193	0.118	0.213	0.0194	-0.35	TRUE	TRUE	FALSE	TRUE
Q5EBJ4	Ermn	10.4924	10.5663	10.5076	10.6879	10.6045	10.5663	10.4837	10.4425	11.1816	11.1405	11.1757	11.0623	10.6715	10.8314	10.7976	10.7823	FALSE	0	2.74e-08	1.24e-06	0.576	5.81e-06	0.000134	-0.369	0.00147205	0.0326	0.207	-0.225	-0.186	0.0211	0.39	TRUE	TRUE	FALSE	TRUE
Q571I9	Aldh16a1	5.6376	5.68067	6.37381	5.83888	6.37911	5.89752	6.5243	6.56132	6.595	6.70779	6.26591	6.50398	6.14556	6.11806	5.83493	5.92654	FALSE	0	0.00213142	0.0082	0.635	0.00911645	0.038	-0.512	0.478143	0.707	0.124	0.154	-0.304	-0.181	0.331	TRUE	TRUE	FALSE	TRUE
Q56A07	Scn2b	9.16918	9.15386	8.92719	9.0087	9.12146	9.11069	9.01143	9.09665	8.72015	8.62718	8.71807	8.75811	9.03661	9.09952	9.16802	9.2489	FALSE	0	2.58e-05	0.000248	-0.359	3.35e-06	8.86e-05	0.432	0.230739	0.479	0.0735	0.0866	0.0663	0.14	-0.293	TRUE	TRUE	FALSE	TRUE
Q4LDD4	Arap1	8.43385	8.16477	8.26275	8.17042	8.09973	8.17433	8.16248	8.22608	8.557	8.62412	8.41248	8.52171	8.09328	8.37707	8.3233	8.26353	FALSE	0	0.00169956	0.00684	0.271	0.00203367	0.0119	-0.265	0.929148	0.975	0.00635	-0.139	-0.0462	-0.0399	0.225	TRUE	TRUE	FALSE	TRUE
Q3V0K9	Pls1	9.67531	9.6946	9.68858	9.63444	9.70839	9.68362	9.61586	9.62844	10.1068	10.0519	10.0021	10.0996	9.64925	9.70892	9.74872	9.80354	FALSE	0	7.6e-08	2.88e-06	0.392	4.77e-07	2.01e-05	-0.337	0.182634	0.419	0.0544	-0.122	-0.108	-0.0536	0.284	TRUE	TRUE	FALSE	TRUE
Q3UY34	Custos	7.44026	7.6816	7.24315	7.5912	7.61165	7.42394	7.32574	7.34118	7.06806	7.03823	7.38319	7.20513	7.41094	7.55113	7.41583	7.55807	FALSE	0	0.00611178	0.019	-0.315	0.00677594	0.0301	0.31	0.959513	0.986	-0.00506	0.0325	0.096	0.0909	-0.219	TRUE	TRUE	FALSE	TRUE
Q3UXZ6	Fam81a	7.87363	7.71678	7.84306	7.90669	7.71086	7.78723	7.77176	7.64938	7.41928	7.33028	7.44049	7.42462	7.72818	7.69326	7.73466	7.59614	FALSE	0	3.81e-07	9.7e-06	-0.431	4.12e-05	0.000585	0.284	0.00911229	0.0806	-0.147	0.0657	0.171	0.0239	-0.26	TRUE	TRUE	FALSE	TRUE
Q3UW53	Niban1	7.65378	7.47672	7.22627	7.26901	7.34386	7.40911	7.51129	7.58164	7.79813	7.86401	7.81598	7.83751	7.31995	7.61607	7.37597	7.45121	FALSE	0	0.000268965	0.00161	0.422	0.000568271	0.00439	-0.388	0.701347	0.856	0.0344	-0.0729	-0.128	-0.0936	0.295	TRUE	TRUE	FALSE	TRUE
Q3UUD2	Spry3	6.25599	6.31959	6.66149	6.09734	6.54553	6.27261	6.59393	6.18272	5.95187	5.75809	5.87871	5.8482	6.49626	6.41262	6.32411	6.74374	FALSE	0	0.00165883	0.00672	-0.474	0.000134172	0.00146	0.635	0.210634	0.456	0.161	0.127	0.0622	0.223	-0.412	TRUE	TRUE	FALSE	TRUE
Q3UNZ8	Cryzl2	8.75397	8.76619	8.49126	8.62374	8.51164	8.66283	8.77316	8.69554	9.50462	9.64476	9.62591	9.63488	8.76288	8.82575	8.85176	8.88799	FALSE	0	8e-10	8.8e-08	0.944	1.14e-08	1.23e-06	-0.77	0.0193809	0.12	0.173	-0.278	-0.28	-0.106	0.664	TRUE	TRUE	FALSE	TRUE
Q3UNH4	Gprin1	11.872	11.7514	11.5905	11.7066	11.4471	11.7479	11.5687	11.7821	11.1803	11.0758	11.1576	11.2228	11.5387	11.5713	11.6859	11.7254	FALSE	0	2.83e-06	4.46e-05	-0.571	2.34e-05	0.000383	0.471	0.212141	0.458	-0.0998	0.0974	0.191	0.0913	-0.38	TRUE	TRUE	FALSE	TRUE
Q3UMQ8	Naf1	4.23846	4.33361	4.15053	4.32393	3.49702	3.22425	3.10112	3.9108	2.90433	3.34468	2.73373	3.43025	4.17041	4.27168	4.1328	4.53096	FALSE	0	1.07e-05	0.000124	-1.16	9.31e-06	0.000192	1.17	0.933488	0.978	0.0148	-0.335	0.493	0.508	-0.665	TRUE	TRUE	FALSE	TRUE
Q3ULW8	Parp3	5.84104	5.69373	5.48098	5.37781	5.67779	5.51925	5.80628	6.03188	6.95173	6.83797	6.771	6.29274	5.82283	5.51751	5.99638	6.17061	TRUE	3	8.9e-06	0.000108	1.11	0.000168057	0.00173	-0.837	0.113834	0.32	0.278	-0.228	-0.388	-0.11	0.727	TRUE	TRUE	FALSE	TRUE
Q3UHA3	Spg11	5.92782	5.95516	6.07396	5.27886	5.88966	5.67661	5.56726	5.60801	6.06295	6.34475	6.19128	6.31317	5.81898	5.60351	5.92663	5.86356	TRUE	1	0.0105362	0.0296	0.419	0.0097183	0.0397	-0.425	0.968136	0.99	-0.00578	-0.196	-0.0724	-0.0782	0.347	TRUE	TRUE	FALSE	TRUE
Q3UFK8	Frmd8	7.53211	7.32344	7.37716	7.48124	7.35602	7.20988	7.17998	7.24082	7.77932	7.84554	7.94139	7.8451	7.28157	7.31316	7.27669	7.23498	FALSE	0	1e-06	1.96e-05	0.424	2.3e-08	2.06e-06	-0.576	0.0109772	0.0883	-0.152	-0.204	-0.0227	-0.175	0.402	TRUE	TRUE	FALSE	TRUE
Q3U5Q7	Cmpk2	9.53125	9.56791	9.44202	9.39755	9.4366	9.39138	9.43669	9.46939	9.93696	9.98194	9.92994	9.8861	9.3802	9.43918	9.45184	9.45602	FALSE	0	1.84e-08	8.89e-07	0.449	4.35e-09	5.97e-07	-0.502	0.20442	0.449	-0.0529	-0.137	-0.0862	-0.139	0.363	TRUE	TRUE	FALSE	TRUE
Q3U4H6	Hexd	8.51242	8.17225	8.3289	8.27949	8.3427	8.52474	8.39986	8.39669	7.75783	7.84413	7.80691	7.64586	8.05647	8.32984	7.81242	8.35242	FALSE	0	0.00010189	0.000746	-0.56	0.00305316	0.0163	0.374	0.0985335	0.296	-0.185	0.256	0.163	-0.0224	-0.396	TRUE	TRUE	FALSE	TRUE
Q3U0D9	Hace1	7.66314	7.85735	7.59663	7.6061	7.70831	7.60182	7.71683	7.71571	7.40569	7.46295	7.31185	7.40676	7.70778	7.60992	7.79016	7.78429	FALSE	0	0.000307352	0.00178	-0.284	8.32e-05	0.001	0.326	0.49214	0.717	0.0422	0.0641	0.0592	0.101	-0.225	TRUE	TRUE	FALSE	TRUE
Q3TXX4	Slc17a7	13.0944	13.2394	13.1808	13.2668	13.2593	13.1717	13.3186	13.2302	12.7664	12.8169	12.7982	12.7673	13.1417	13.1115	13.0995	13.1569	FALSE	0	8.91e-08	3.22e-06	-0.408	8.2e-07	2.95e-05	0.34	0.118874	0.329	-0.0679	0.156	0.107	0.0387	-0.301	TRUE	TRUE	FALSE	TRUE
Q3TW96	Uap1l1	10.0213	9.87875	9.84331	9.80621	9.72726	9.75253	9.89491	10.0009	10.5134	10.508	10.4777	10.4635	9.91796	10.0222	9.94626	9.80061	FALSE	0	1.97e-07	5.76e-06	0.603	4.03e-07	1.81e-05	-0.569	0.602399	0.796	0.0344	-0.192	-0.149	-0.114	0.455	TRUE	TRUE	FALSE	TRUE
Q3TVI8	Pbxip1	8.36039	8.07943	8.26535	8.13015	7.98607	8.10236	7.94977	8.00377	8.58437	8.71356	8.62501	8.69592	8.27879	8.3153	8.23594	8.26841	FALSE	0	1.57e-06	2.81e-05	0.446	9.55e-06	0.000194	-0.38	0.265063	0.513	0.0658	-0.277	-0.0783	-0.0126	0.368	TRUE	TRUE	FALSE	TRUE
Q3TN34	Micall2	7.37912	7.2677	7.45106	6.94657	7.36489	7.21471	7.18038	7.59147	7.99345	7.95677	7.85131	7.69113	7.29352	7.28231	7.39122	7.53388	FALSE	0	9.26e-05	0.00069	0.612	0.000610939	0.00464	-0.498	0.331924	0.581	0.114	-0.124	-0.201	-0.0866	0.411	TRUE	TRUE	FALSE	TRUE
Q3TLP5	Echdc2	7.86457	7.72455	7.54541	7.931	7.52657	7.909	7.73686	7.75953	8.0232	7.97459	8.07981	8.1633	7.64577	7.63003	7.71531	7.55053	FALSE	0	0.00417645	0.014	0.294	0.000215598	0.00209	-0.425	0.150564	0.376	-0.131	-0.0658	-0.0324	-0.163	0.261	TRUE	TRUE	FALSE	TRUE
Q3TH73	Ttyh2	7.63049	7.51176	7.54756	7.47423	7.30612	7.49744	7.31668	7.49682	7.86338	7.8832	8.08446	7.9404	7.5376	7.76593	7.51897	7.32007	FALSE	0	0.000241213	0.00148	0.402	0.000213497	0.00208	-0.407	0.949076	0.983	-0.00536	-0.202	-0.0649	-0.0703	0.337	TRUE	TRUE	FALSE	TRUE
Q3TBT3	Sting1	6.13863	6.14306	5.84628	6.27923	5.96672	6.14203	6.16006	6.22455	6.55822	6.7534	6.69614	6.82835	6.36769	6.11003	6.45924	6.03976	FALSE	0	4.56e-05	0.000386	0.607	0.000561146	0.00435	-0.465	0.196299	0.437	0.142	-0.171	-0.193	-0.0504	0.414	TRUE	TRUE	FALSE	TRUE
Q3TBD2	Arhgap45	6.85923	7.13953	7.21142	7.05084	7.2504	7.47317	7.40483	7.19389	7.40013	7.53103	7.37609	7.72311	7.09379	6.98266	6.95024	7.05382	TRUE	1	0.000200449	0.00129	0.442	7.9e-05	0.000962	-0.487	0.620017	0.809	-0.0451	0.0997	-0.166	-0.211	0.277	TRUE	TRUE	FALSE	TRUE
Q3T9E4	Tgtp2	7.03925	6.44783	6.58633	6.19423	6.0172	6.0629	7.01239	7.00842	7.85506	8.18393	8.21692	7.73341	7.01555	7.25469	7.15229	7.31423	FALSE	0	2.68e-05	0.000256	1.43	0.00376149	0.0193	-0.813	0.0197199	0.121	0.617	-0.543	-0.502	0.116	0.929	TRUE	TRUE	FALSE	TRUE
Q2WF71	Lrfn1	7.49627	7.4042	7.302	7.47526	7.4169	7.33001	7.44273	7.28686	7.1105	6.9952	7.27504	7.09439	7.37274	7.42838	7.4577	7.43595	FALSE	0	0.000155949	0.00106	-0.301	0.000136446	0.00148	0.305	0.94336	0.981	0.00426	0.0364	0.0867	0.0909	-0.214	TRUE	TRUE	FALSE	TRUE
Q2TA57	Asphd1	8.37145	8.5898	8.60359	8.69315	8.50511	8.47503	8.58944	8.42317	8.1197	7.8656	8.01893	7.95511	8.43371	8.48375	8.42596	8.43718	FALSE	0	4.38e-07	1.09e-05	-0.575	6.55e-06	0.000148	0.455	0.0901685	0.282	-0.119	0.124	0.19	0.0707	-0.385	TRUE	TRUE	FALSE	TRUE
Q0VBF8	Stum	10.524	9.85728	9.92954	9.7722	9.77918	10.2285	9.82843	10.0997	9.35813	8.99005	9.33078	9.45017	10.0319	9.91153	10.2913	9.97799	FALSE	0	0.000357352	0.00199	-0.738	0.000242422	0.00227	0.771	0.840602	0.933	0.0324	0.149	0.186	0.218	-0.553	TRUE	TRUE	FALSE	TRUE
Q08761	Pros1	5.52254	5.28332	5.39268	5.32703	5.36122	5.57179	5.36356	4.89654	6.58802	6.38671	6.55684	6.78666	5.10495	5.192	5.51783	5.57186	TRUE	7	4.69e-07	1.14e-05	1.2	3.32e-07	1.54e-05	-1.23	0.804302	0.914	-0.0347	-0.353	-0.27	-0.305	0.928	TRUE	TRUE	FALSE	TRUE
Q08642	Padi2	9.93198	10.1548	10.0233	10.0702	9.98693	10.063	9.93418	10.108	10.837	10.9735	10.6947	10.797	10.1081	10.1299	10.2106	10.0665	FALSE	0	4.82e-09	3.55e-07	0.78	2.09e-08	1.92e-06	-0.697	0.200117	0.443	0.0837	-0.233	-0.211	-0.127	0.57	TRUE	TRUE	FALSE	TRUE
Q07417	Acads	10.1861	9.87109	9.87059	9.86325	9.75131	9.93083	10.0365	9.9439	10.462	10.4206	10.5816	10.5009	10.0413	10.1262	10.0181	10.0977	FALSE	0	3.45e-06	5.18e-05	0.544	5.45e-05	0.000727	-0.42	0.118248	0.328	0.123	-0.191	-0.159	-0.0356	0.385	TRUE	TRUE	FALSE	TRUE
Q07235	Serpine2	9.25515	9.30039	9.21539	9.32011	9.11002	9.09469	9.08556	9.14963	9.65536	9.6423	9.58842	9.49283	9.23697	9.28824	9.35736	9.37777	FALSE	0	2.89e-06	4.53e-05	0.322	1.39e-05	0.000259	-0.28	0.343212	0.592	0.0423	-0.213	-0.0504	-0.00805	0.272	TRUE	TRUE	FALSE	TRUE
Q06890	Clu	11.0696	10.9502	11.0934	11.115	10.9674	11.1618	11.0785	10.9482	12.0742	11.8807	12.1114	12.0671	11.2241	11.22	11.2488	11.1776	FALSE	0	1.01e-10	2.12e-08	0.976	1.11e-09	2.53e-07	-0.816	0.0153163	0.105	0.161	-0.298	-0.28	-0.119	0.697	TRUE	TRUE	FALSE	TRUE
Q05793	Hspg2	8.42676	8.34325	8.1751	8.18092	8.23436	8.26193	8.53136	8.41672	8.76492	8.72871	8.78722	8.81896	8.42	8.5913	8.4415	8.49241	FALSE	0	6.04e-06	7.97e-05	0.493	0.00108701	0.00724	-0.289	0.0115327	0.0904	0.205	-0.115	-0.194	0.0103	0.299	TRUE	TRUE	FALSE	TRUE
Q03963	Eif2ak2	6.68219	6.55586	6.0729	6.51633	6.79589	6.86052	7.20818	6.9275	7.50044	7.40626	7.34498	7.46757	6.72553	6.85008	7.02778	6.69619	FALSE	0	1.11e-06	2.14e-05	0.973	0.000176697	0.0018	-0.605	0.0083246	0.0765	0.368	0.0331	-0.458	-0.09	0.515	TRUE	TRUE	FALSE	TRUE
Q03137	Epha4	10.1428	10.5366	10.2743	10.4251	10.3005	10.3195	10.312	10.3991	9.78432	9.98698	9.70999	9.78034	10.2133	10.051	10.2593	10.1902	FALSE	0	9.74e-06	0.000115	-0.529	0.00040967	0.00342	0.363	0.0538846	0.213	-0.166	0.165	0.177	0.0106	-0.352	TRUE	TRUE	FALSE	TRUE
Q03059	Chat	8.31712	8.291	8.10477	8.12598	8.3495	8.33122	8.36476	8.38577	8.65395	8.63404	8.62983	8.56579	8.279	8.35021	8.38076	8.34089	FALSE	0	4.41e-07	1.09e-05	0.411	2.98e-05	0.000455	-0.283	0.0163245	0.11	0.128	-0.0237	-0.172	-0.0438	0.239	TRUE	TRUE	FALSE	TRUE
Q02111	Prkcq	5.99007	6.11399	5.83531	5.8508	6.41679	5.79858	5.99264	6.46441	6.18216	6.66128	6.32386	6.53572	5.66521	5.61494	5.95339	5.73622	TRUE	3	0.00502912	0.0163	0.478	0.000308642	0.00275	-0.683	0.176506	0.411	-0.205	0.0971	-0.123	-0.329	0.355	TRUE	TRUE	FALSE	TRUE
Q01815	Cacna1c	8.15062	8.22635	8.07914	8.24455	8.20999	8.21548	8.28068	8.27061	7.84512	7.84634	7.85264	7.8978	8.12152	8.10156	8.16664	8.12901	FALSE	0	7.74e-07	1.64e-05	-0.315	4.72e-06	0.000115	0.269	0.247208	0.495	-0.0455	0.142	0.0728	0.0273	-0.242	TRUE	TRUE	FALSE	TRUE
Q01514	Gbp1	6.32857	6.3161	6.32975	6.10059	6.25988	6.34031	6.41769	6.36877	6.85175	6.71906	6.35148	6.65507	6.01187	6.19951	5.88653	6.65026	TRUE	8	0.0162465	0.042	0.376	0.00499442	0.024	-0.457	0.562321	0.768	-0.0817	-0.015	-0.0929	-0.175	0.283	TRUE	TRUE	FALSE	TRUE
Q01279	Egfr	9.41452	9.36343	9.48313	9.54372	9.43256	9.5554	9.69529	9.42317	9.83234	9.76472	9.6119	9.70265	9.38422	9.30451	9.14929	9.28316	FALSE	0	0.00136558	0.00578	0.277	1.52e-05	0.000275	-0.448	0.0277071	0.143	-0.171	0.0301	-0.0453	-0.216	0.231	TRUE	TRUE	FALSE	TRUE
Q00993	Axl	4.41809	3.81412	4.11287	4.13509	3.7104	4.01252	4.58167	4.13568	4.56124	4.6395	4.78223	4.46127	4.01125	4.10565	4.02627	4.26338	TRUE	8	0.00696632	0.0212	0.491	0.00550146	0.026	-0.509	0.90755	0.965	-0.0184	-0.126	-0.116	-0.134	0.375	TRUE	TRUE	FALSE	TRUE
Q00915	Rbp1	9.10379	8.94794	9.00079	8.93788	8.88792	8.89218	9.15988	9.05581	9.67093	9.7591	9.6571	9.42177	9.11671	9.27706	9.21919	9.2583	FALSE	0	8.37e-07	1.73e-05	0.63	9.14e-05	0.00109	-0.409	0.0115001	0.0904	0.22	-0.211	-0.213	0.00742	0.417	TRUE	TRUE	FALSE	TRUE
Q00724	Rbp4	6.96596	7.22566	7.17303	7.23692	7.02048	6.96073	7.7275	7.63873	7.77297	7.91574	7.65473	7.47149	7.25693	7.1272	6.78611	6.84204	FALSE	0	0.00547218	0.0174	0.553	0.000969282	0.00666	-0.701	0.397803	0.64	-0.147	0.0383	-0.148	-0.295	0.405	TRUE	TRUE	FALSE	TRUE
Q00623	Apoa1	10.5892	10.0902	10.0309	9.96461	9.84354	10.2682	10.594	10.5782	10.7411	10.8788	10.6142	10.7418	10.2535	10.2965	10.2348	10.2288	FALSE	0	0.00215405	0.00826	0.575	0.00646291	0.029	-0.491	0.590403	0.788	0.0847	-0.0508	-0.203	-0.118	0.372	TRUE	TRUE	FALSE	TRUE
Q00612	G6pdx	10.7549	10.8128	10.8394	10.8589	10.7946	10.8541	10.7837	10.7917	11.3443	11.3808	11.3842	11.4262	10.9427	10.9328	10.9412	10.8126	FALSE	0	3.76e-10	5.29e-08	0.567	3.78e-09	5.61e-07	-0.477	0.0288343	0.147	0.0908	-0.172	-0.162	-0.0711	0.405	TRUE	TRUE	FALSE	TRUE
P98084	Apba2	9.57331	9.60154	9.58759	9.67837	9.49609	9.56464	9.45029	9.53214	9.30844	9.2704	9.25905	9.28227	9.6062	9.56642	9.58063	9.58859	FALSE	0	8.45e-08	3.12e-06	-0.33	2.22e-07	1.16e-05	0.305	0.465338	0.697	-0.0247	0.0142	0.114	0.0888	-0.217	TRUE	TRUE	FALSE	TRUE
P97821	Ctsc	6.95631	6.53688	6.4331	6.67278	6.56157	6.58003	6.80433	6.75952	7.32956	7.23477	7.09405	7.33094	6.68034	7.05641	6.89198	6.89835	FALSE	0	6.5e-05	0.00052	0.598	0.0041253	0.0208	-0.366	0.0476873	0.198	0.232	-0.187	-0.214	0.018	0.384	TRUE	TRUE	FALSE	TRUE
P97813	Pld2	8.36854	8.09695	8.24653	8.21194	8.24034	8.31274	8.25737	8.16402	8.70705	8.67769	8.71914	8.70853	8.15017	8.30123	8.14659	8.26515	FALSE	0	4.79e-07	1.15e-05	0.472	3.26e-07	1.52e-05	-0.487	0.783489	0.901	-0.0152	-0.105	-0.117	-0.133	0.355	TRUE	TRUE	FALSE	TRUE
P97742	Cpt1a	9.57947	9.47873	9.4585	9.4169	9.34607	9.38664	9.54214	9.56419	10.0884	10.2241	9.99322	10.0946	9.45229	9.61459	9.55598	9.50423	FALSE	0	8.12e-08	3.04e-06	0.617	2.23e-07	1.16e-05	-0.568	0.443668	0.676	0.0484	-0.184	-0.16	-0.112	0.456	TRUE	TRUE	FALSE	TRUE
P97441	Slc30a3	9.63827	9.8291	9.99345	10.0477	9.99595	9.92329	9.92529	9.88622	9.36001	9.30059	9.36804	9.34509	9.83708	9.83945	9.6674	9.80146	FALSE	0	3e-06	4.65e-05	-0.534	2.33e-05	0.000382	0.443	0.226323	0.475	-0.0908	0.198	0.142	0.0515	-0.391	TRUE	TRUE	FALSE	TRUE
P97372	Psme2	9.33987	9.2227	9.28877	9.15459	9.3072	9.2315	9.3359	9.29951	9.87429	9.89667	9.70563	9.84064	9.37663	9.37639	9.42399	9.49824	FALSE	0	1.54e-08	7.99e-07	0.578	1.05e-06	3.51e-05	-0.41	0.00503012	0.0578	0.167	-0.155	-0.197	-0.0295	0.381	TRUE	TRUE	FALSE	TRUE
P97371	Psme1	9.69772	9.67648	9.6516	9.66214	9.78578	9.71611	9.8499	9.79953	10.2072	10.2326	10.2077	10.1957	9.80387	9.87972	9.9237	9.88399	FALSE	0	2.44e-10	3.7e-08	0.539	1.04e-07	6.53e-06	-0.338	4.06e-05	0.00468	0.201	-0.098	-0.214	-0.013	0.325	TRUE	TRUE	FALSE	TRUE
P97352	S100a13	10.3675	10.2013	9.96927	10.0973	9.76633	9.81032	9.72046	9.81064	10.5094	10.475	10.5366	10.769	10.045	10.1036	10.2277	10.0687	FALSE	0	0.000129852	0.000909	0.414	4.42e-05	0.000614	-0.461	0.55885	0.766	-0.0476	-0.378	0.00396	-0.0436	0.418	TRUE	TRUE	FALSE	TRUE
P97346	Nxn	7.3319	7.15009	7.1104	7.35667	7.11444	7.21334	7.23277	7.05391	7.72225	7.82271	7.74769	7.60838	7.2175	7.35066	7.30086	7.30742	FALSE	0	2.27e-06	3.76e-05	0.488	9.15e-06	0.000189	-0.431	0.389579	0.634	0.0568	-0.199	-0.115	-0.0585	0.373	TRUE	TRUE	FALSE	TRUE
P97315	Csrp1	11.654	11.7965	11.7253	11.7975	11.7355	11.7999	11.7054	11.769	12.2051	12.3564	12.2413	12.2635	11.7738	11.8611	11.8523	11.7947	FALSE	0	6.7e-09	4.51e-07	0.523	5.16e-08	3.87e-06	-0.446	0.0931185	0.286	0.0771	-0.143	-0.152	-0.0752	0.371	TRUE	TRUE	FALSE	TRUE
P84096	Rhog	11.1905	11.4216	11.5273	11.4966	11.4621	11.3774	11.3991	11.4587	11.9623	12.0032	12.0431	11.9183	11.6357	11.6528	11.5374	11.4425	FALSE	0	5.87e-07	1.34e-05	0.573	2.27e-05	0.000376	-0.415	0.0331805	0.159	0.158	-0.171	-0.187	-0.0284	0.386	TRUE	TRUE	FALSE	TRUE
P84086	Cplx2	13.3363	13.3499	13.2421	13.3589	13.3955	13.5439	13.4843	13.5411	12.9757	12.9302	12.8941	13.0956	13.2872	13.3712	13.4205	13.3768	FALSE	0	6.19e-06	8.1e-05	-0.348	1.68e-06	5.1e-05	0.39	0.412183	0.651	0.0421	0.204	0.0341	0.0762	-0.314	TRUE	TRUE	FALSE	TRUE
P82343	Renbp	5.80885	5.6971	5.96961	5.86428	5.94074	5.58978	5.83901	5.57609	6.81647	7.06261	6.6259	6.8798	5.82978	6.06516	6.00646	6.35586	FALSE	0	5.71e-07	1.32e-05	1.01	1.09e-05	0.000216	-0.782	0.0721751	0.25	0.229	-0.384	-0.286	-0.0562	0.726	TRUE	TRUE	FALSE	TRUE
P80205	Otx1	5.47992	5.58116	5.58936	5.43335	5.6783	5.59607	5.82567	5.74692	5.69926	6.04706	5.89086	5.98065	5.39996	5.58976	5.22754	5.51801	TRUE	10	0.00048216	0.00252	0.384	7.17e-05	0.000898	-0.471	0.323104	0.571	-0.0871	0.069	-0.122	-0.209	0.262	TRUE	TRUE	FALSE	TRUE
P70704	Atp8a1	12.1362	12.1411	12.0042	12.1352	12.0865	11.981	12.056	12.0207	11.7262	11.7511	11.7385	11.6759	11.975	11.9866	12.0813	12.0239	FALSE	0	1.4e-07	4.52e-06	-0.381	3.13e-06	8.41e-05	0.294	0.0444401	0.19	-0.0875	0.0661	0.134	0.0467	-0.247	TRUE	TRUE	FALSE	TRUE
P70689	Gjb6	7.81273	7.59322	7.72306	7.73356	7.59986	7.47557	7.49409	7.64471	8.34166	8.2967	8.2153	8.25948	7.64819	7.84616	7.85123	7.70321	FALSE	0	1.69e-07	5.13e-06	0.563	4.83e-07	2.02e-05	-0.516	0.446146	0.679	0.0466	-0.274	-0.112	-0.0652	0.451	TRUE	TRUE	FALSE	TRUE
P70444	Bid	9.12134	9.09499	8.77669	9.03077	8.81998	9.08838	8.91191	8.90697	8.50975	8.57358	8.14618	8.35015	8.65954	8.66113	8.81174	8.81813	FALSE	0	1.67e-05	0.000175	-0.611	0.00302259	0.0162	0.343	0.0141728	0.101	-0.268	0.164	0.238	-0.0299	-0.373	TRUE	TRUE	FALSE	TRUE
P70408	Cdh10	7.95015	7.31274	7.4767	7.53281	7.51112	7.49321	7.66791	7.51674	6.96686	7.21725	7.01792	7.02784	7.41537	7.38023	7.46007	7.4098	FALSE	0	0.000189057	0.00124	-0.511	0.00339084	0.0177	0.359	0.159272	0.389	-0.152	0.15	0.171	0.0191	-0.34	TRUE	TRUE	FALSE	TRUE
P70407	Cdh9	8.47927	8.63762	8.57425	8.57847	8.79838	8.58825	8.74704	8.82306	8.03545	7.87083	8.11021	7.95108	8.52613	8.51056	8.48534	8.57936	FALSE	0	1.14e-07	3.91e-06	-0.576	2.9e-07	1.41e-05	0.533	0.486589	0.714	-0.0421	0.283	0.111	0.0694	-0.464	TRUE	TRUE	FALSE	TRUE
P70339	Frat1	6.18982	6.23402	5.33774	6.20165	6.054	5.77412	6.14735	5.99881	5.0038	5.15162	5.44833	5.52975	6.20546	5.87924	5.86685	6.27658	FALSE	0	0.00193658	0.00759	-0.707	0.000960906	0.00662	0.774	0.727572	0.869	0.0662	0.162	0.16	0.226	-0.548	TRUE	TRUE	FALSE	TRUE
P70271	Pdlim4	7.20844	7.31554	7.2314	7.39264	7.2202	7.25644	7.30494	7.329	8.31044	8.48678	8.405	8.4368	7.42059	7.57748	7.39277	7.401	FALSE	0	5.39e-12	3.56e-09	1.12	4.45e-11	2.49e-08	-0.962	0.00984901	0.0834	0.161	-0.328	-0.319	-0.158	0.804	TRUE	TRUE	FALSE	TRUE
P70211	Dcc	8.51906	8.6241	8.52417	8.69956	8.4666	8.65698	8.4193	8.63065	8.15314	8.18496	8.08338	8.15399	8.49813	8.39087	8.60232	8.51706	FALSE	0	3.89e-06	5.78e-05	-0.448	4.32e-05	0.000604	0.358	0.167569	0.4	-0.0896	0.0981	0.146	0.0568	-0.301	TRUE	TRUE	FALSE	TRUE
P70202	Lxn	11.4334	11.2425	11.4962	11.3588	11.4345	11.5226	11.4261	11.3962	11.8391	11.755	11.7295	11.8106	11.4457	11.4761	11.3991	11.5011	FALSE	0	1.48e-06	2.7e-05	0.401	1.41e-05	0.000261	-0.328	0.173023	0.407	0.0728	-0.0718	-0.134	-0.0612	0.267	TRUE	TRUE	FALSE	TRUE
P70170	Abcc9	9.1188	9.0517	9.08482	9.15378	9.14304	9.19027	9.12756	9.18513	8.79129	8.77448	8.74856	8.93674	9.06582	9.16242	9.21791	8.89035	FALSE	0	0.000326217	0.00186	-0.29	0.0005746	0.00443	0.271	0.772086	0.894	-0.0181	0.121	0.0621	0.044	-0.227	TRUE	TRUE	FALSE	TRUE
P68510	Ywhah	13.9219	13.8421	13.8109	13.8722	13.8489	13.9403	13.8043	13.7973	13.5228	13.4564	13.6688	13.6597	13.8123	13.7911	13.8683	13.9009	FALSE	0	7.1e-05	0.000555	-0.285	0.000137069	0.00148	0.266	0.72313	0.868	-0.0186	0.0653	0.0794	0.0608	-0.205	TRUE	TRUE	FALSE	TRUE
P63328	Ppp3ca	14.0295	14.0507	13.9008	13.9921	13.9396	14.0344	13.9723	14.1234	13.5429	13.5942	13.5546	13.662	13.9226	13.9632	14.1064	14.1326	FALSE	0	4.11e-06	6.01e-05	-0.405	1.47e-06	4.59e-05	0.443	0.508794	0.73	0.0379	0.11	0.0857	0.124	-0.319	TRUE	TRUE	FALSE	TRUE
P63213	Gng2	14.093	14.168	14.0548	14.1941	14.048	13.872	14.0536	14.0729	13.8178	14.0229	13.698	13.8105	14.0393	14.042	14.1587	14.1683	FALSE	0	0.000608746	0.00301	-0.29	0.00128971	0.00826	0.265	0.706571	0.858	-0.0254	-0.00802	0.108	0.0824	-0.182	TRUE	TRUE	FALSE	TRUE
P63082	Atp6v0c	12.8055	12.7058	12.8097	12.7123	13.4955	13.2569	13.4293	13.2989	12.3902	12.2599	12.3902	12.7512	12.6952	12.9536	12.8164	12.9638	FALSE	0	0.0048062	0.0157	-0.31	0.000587468	0.00451	0.409	0.305091	0.553	0.0989	0.512	-0.1	-0.00114	-0.411	TRUE	TRUE	FALSE	TRUE
P63044	Vamp2	11.7741	11.6232	11.3588	11.4679	11.1199	11.5317	11.3615	11.7007	10.8523	10.8454	10.7492	10.9532	11.1602	11.2575	11.3874	11.2953	FALSE	0	1.62e-05	0.000172	-0.706	0.00175714	0.0106	0.425	0.0233974	0.132	-0.281	0.151	0.279	-0.0023	-0.427	TRUE	TRUE	FALSE	TRUE
P63028	Tpt1	11.2347	11.1204	10.9954	11.0818	10.9399	11.0995	10.9032	11.0869	10.7918	10.7127	10.8074	10.8612	10.9728	11.019	11.2166	11.1534	FALSE	0	0.000309107	0.00178	-0.315	0.000513408	0.00406	0.297	0.794611	0.909	-0.0176	0.00759	0.108	0.0906	-0.207	TRUE	TRUE	FALSE	TRUE
P63011	Rab3a	12.8697	13.1082	12.9317	13.0385	13.0416	12.8195	12.8151	12.9336	12.4905	12.5355	12.4372	12.588	12.8643	12.8083	13.0468	12.964	FALSE	0	5.95e-06	7.87e-05	-0.474	3.01e-05	0.000458	0.408	0.345195	0.592	-0.0662	0.0717	0.156	0.0901	-0.318	TRUE	TRUE	FALSE	TRUE
P62960	Ybx1	8.55451	8.63744	8.79388	8.73729	8.78265	8.93745	8.97911	9.13281	9.08344	9.17741	9.06659	9.02895	8.76286	8.6589	8.5633	8.98824	FALSE	0	0.000402367	0.00219	0.408	0.00158836	0.00976	-0.346	0.492418	0.717	0.0625	0.0902	-0.187	-0.124	0.221	TRUE	TRUE	FALSE	TRUE
P62823	Rab3c	13.0221	13.1465	12.9149	13.1777	13.0483	13.1718	13.1157	13.134	12.646	12.5675	12.7991	12.7481	13.0234	12.9937	13.0453	12.8491	FALSE	0	5.23e-05	0.000435	-0.375	0.000619667	0.00469	0.288	0.204592	0.449	-0.0874	0.155	0.103	0.0152	-0.273	TRUE	TRUE	FALSE	TRUE
P62069	Usp46	9.07361	9.28091	8.91701	9.19938	8.85891	8.93446	8.69598	8.89539	8.62662	8.70961	8.82215	8.71833	8.9857	8.89111	9.19709	8.91096	FALSE	0	0.000318871	0.00183	-0.399	0.00538654	0.0255	0.277	0.171667	0.405	-0.122	-0.0736	0.198	0.0764	-0.201	TRUE	TRUE	FALSE	TRUE
P61588	Rnd3	6.84932	6.79288	7.20823	6.49145	6.78624	6.75365	7.03332	6.71855	7.11598	7.59673	7.49388	7.47565	7.21692	6.62222	6.49724	7.26909	TRUE	3	0.00633409	0.0196	0.585	0.0129795	0.0498	-0.519	0.723721	0.868	0.0659	-0.172	-0.16	-0.0937	0.425	TRUE	TRUE	FALSE	TRUE
P60469	Ppfia3	10.6797	10.6855	10.5164	10.6515	10.4575	10.5835	10.5175	10.5157	10.2551	10.275	10.2202	10.2162	10.4765	10.4194	10.6035	10.5644	FALSE	0	9.99e-07	1.96e-05	-0.392	5.06e-05	0.00069	0.274	0.0279596	0.144	-0.117	0.0412	0.156	0.0386	-0.236	TRUE	TRUE	FALSE	TRUE
P59999	Arpc4	13.3856	13.4057	12.9522	13.2862	13.1851	13.1814	13.1587	13.4445	12.9379	12.9294	12.8145	12.8923	13.2159	13.1604	13.3885	13.2861	FALSE	0	0.00144563	0.00604	-0.364	0.00128963	0.00826	0.369	0.954647	0.985	0.00534	0.0784	0.0934	0.0987	-0.27	TRUE	TRUE	FALSE	TRUE
P58044	Idi1	8.88794	8.90716	8.91978	8.95505	8.93489	8.7272	8.91239	8.86093	8.42534	8.35379	8.43931	8.37693	8.93633	8.98046	8.91808	8.9044	FALSE	0	6.97e-09	4.65e-07	-0.519	4.55e-09	6.12e-07	0.536	0.690081	0.852	0.0173	0.0814	0.14	0.157	-0.379	TRUE	TRUE	FALSE	TRUE
P57776	Eef1d	10.1176	10.2253	10.1809	10.286	10.2727	10.341	10.332	10.2747	10.5266	10.5973	10.5743	10.5793	10.2637	10.276	10.2524	10.2779	FALSE	0	7.28e-08	2.77e-06	0.367	7.89e-07	2.89e-05	-0.302	0.0939149	0.287	0.065	-0.031	-0.134	-0.0686	0.233	TRUE	TRUE	FALSE	TRUE
P56565	S100a1	10.9374	10.9845	10.8733	11.0489	11.0131	11.0149	11.0111	10.9351	11.6818	11.6267	11.7044	11.6885	11.0411	11.1438	11.1503	11.0986	FALSE	0	5.47e-11	1.37e-08	0.714	1.21e-09	2.56e-07	-0.567	0.00274837	0.0437	0.147	-0.191	-0.224	-0.0761	0.491	TRUE	TRUE	FALSE	TRUE
P56564	Slc1a3	14.6856	14.9223	14.8967	14.9642	15.0964	14.9477	14.962	15.086	15.1156	15.2684	15.1206	15.2231	14.8698	14.8299	14.9034	14.9899	FALSE	0	0.000181943	0.0012	0.315	0.000465125	0.00378	-0.284	0.627621	0.813	0.0311	0.0304	-0.125	-0.0943	0.189	TRUE	TRUE	FALSE	TRUE
P55264	Adk	10.5017	10.5759	10.5647	10.5901	10.4719	10.5078	10.3872	10.561	10.9733	10.9104	10.8745	10.8745	10.3665	10.3884	10.5316	10.3822	FALSE	0	2.23e-06	3.71e-05	0.35	3.67e-08	2.91e-06	-0.491	0.00821741	0.0759	-0.141	-0.109	-0.0333	-0.174	0.317	TRUE	TRUE	FALSE	TRUE
P55088	Aqp4	9.9404	10.3814	10.5538	10.5004	10.6458	10.3246	10.5602	10.4643	10.9454	10.9491	10.906	10.8415	10.5599	10.4247	10.3815	10.4475	FALSE	0	0.000119589	0.000846	0.567	0.000816658	0.00584	-0.457	0.327829	0.576	0.109	-0.0529	-0.208	-0.0983	0.359	TRUE	TRUE	FALSE	TRUE
P55065	Pltp	8.41488	8.43231	8.49916	8.55195	8.47521	8.52715	8.49074	8.33493	8.80599	8.79833	8.82262	8.7416	8.50542	8.54557	8.51841	8.51943	FALSE	0	3.34e-06	5.08e-05	0.318	2e-05	0.000344	-0.27	0.287648	0.536	0.0476	-0.104	-0.0869	-0.0393	0.231	TRUE	TRUE	FALSE	TRUE
P55012	Slc12a2	10.036	9.98363	9.75634	9.84432	9.59014	9.71638	10.0527	10.0909	10.3579	10.5343	10.4229	10.3106	10.096	10.1614	10.097	9.97498	FALSE	0	0.000222077	0.00139	0.501	0.00665739	0.0297	-0.324	0.104008	0.304	0.177	-0.202	-0.159	0.0182	0.342	TRUE	TRUE	FALSE	TRUE
P54285	Cacnb3	9.39442	9.40365	9.49499	9.43663	9.55487	9.43419	9.48016	9.44936	9.15602	9.10628	9.13042	9.20142	9.45477	9.43	9.49248	9.28031	FALSE	0	2.48e-05	0.00024	-0.284	4.88e-05	0.00067	0.266	0.702549	0.857	-0.018	0.111	0.0637	0.0456	-0.22	TRUE	TRUE	FALSE	TRUE
P54116	Stom	7.98297	7.69704	7.60953	7.89386	7.66106	8.012	7.91976	7.8476	8.5159	8.45318	8.48885	8.51606	7.98612	8.08519	8.03458	7.95937	FALSE	0	4.82e-07	1.15e-05	0.698	3.45e-05	0.000511	-0.477	0.0156573	0.107	0.22	-0.181	-0.246	-0.0251	0.452	TRUE	TRUE	FALSE	TRUE
P54071	Idh2	11.7336	11.5757	11.6746	11.5981	11.5329	11.5794	11.6429	11.6227	12.1282	12.1165	12.065	12.0895	11.6553	11.702	11.7051	11.6948	FALSE	0	1.01e-08	5.8e-07	0.454	3.69e-08	2.91e-06	-0.41	0.272102	0.52	0.0439	-0.163	-0.112	-0.0679	0.343	TRUE	TRUE	FALSE	TRUE
P53986	Slc16a1	9.64992	10.0846	9.84066	9.80493	10.0823	9.79849	9.81911	10.121	10.3761	10.4924	10.1783	10.2803	9.75977	9.66909	9.80416	9.9719	FALSE	0	0.000322053	0.00184	0.487	0.000145378	0.00155	-0.531	0.677638	0.845	-0.0438	-0.0281	-0.138	-0.182	0.348	TRUE	TRUE	FALSE	TRUE
P52825	Cpt2	9.15148	8.81883	8.75287	8.90876	8.6998	8.91157	9.11484	8.77043	9.42895	9.59402	9.62194	9.58419	8.95531	9.11509	9.02693	9.02532	FALSE	0	5.8e-06	7.71e-05	0.649	5.39e-05	0.00072	-0.527	0.206068	0.451	0.123	-0.218	-0.185	-0.0619	0.465	TRUE	TRUE	FALSE	TRUE
P52795	Efnb1	6.96668	7.32629	6.83019	7.29838	6.88423	6.97166	6.91562	6.95464	6.83194	6.67231	6.90144	6.75565	7.09193	6.98276	7.27205	6.97403	FALSE	0	0.00739052	0.0223	-0.315	0.012148	0.0472	0.29	0.806276	0.915	-0.0252	-0.0453	0.129	0.103	-0.187	TRUE	TRUE	FALSE	TRUE
P52760	Rida	10.192	10.0597	9.91129	10.1326	9.83308	9.8179	9.93634	9.76493	11.009	10.8377	10.7809	10.8163	10.2294	10.2499	10.5657	10.3248	FALSE	0	9.08e-08	3.25e-06	0.787	1.21e-05	0.000236	-0.519	0.00428518	0.0529	0.269	-0.441	-0.205	0.0636	0.582	TRUE	TRUE	FALSE	TRUE
P52624	Upp1	6.7584	6.59097	6.56806	6.14561	6.87063	6.48826	7.14999	6.69908	7.34961	7.50142	7.3407	7.31554	6.54282	6.6377	6.5848	6.63314	FALSE	0	1.14e-05	0.00013	0.861	3.38e-05	0.000502	-0.777	0.530779	0.746	0.0839	-0.0216	-0.308	-0.224	0.553	TRUE	TRUE	FALSE	TRUE
P52332	Jak1	8.34469	8.55434	8.41458	8.27861	8.42839	8.38322	8.41079	8.39869	8.72988	8.81137	8.67683	8.71462	8.41514	8.31594	8.45897	8.46209	FALSE	0	2.04e-05	0.000204	0.335	3.29e-05	0.000494	-0.32	0.783975	0.902	0.015	-0.0821	-0.0893	-0.0743	0.246	TRUE	TRUE	FALSE	TRUE
P52196	Tst	11.2781	11.4145	11.2184	11.3876	11.1337	11.3719	11.0736	11.3537	11.6255	11.6654	11.5738	11.6872	11.2797	11.2205	11.3684	11.1937	FALSE	0	0.000454885	0.00241	0.313	9.19e-05	0.00109	-0.372	0.406453	0.647	-0.0591	-0.132	-0.0407	-0.0998	0.273	TRUE	TRUE	FALSE	TRUE
P52189	Kcnj4	7.6455	7.56241	7.87413	7.57267	7.8463	7.69856	7.85824	7.67159	7.39537	7.24344	7.3566	7.30156	7.74469	7.59397	7.54895	7.52172	FALSE	0	0.000350788	0.00197	-0.339	0.0018169	0.0109	0.278	0.412462	0.651	-0.0613	0.179	0.0739	0.0126	-0.265	TRUE	TRUE	FALSE	TRUE
P51880	Fabp7	9.01524	8.8324	9.12113	9.00545	9.00934	8.807	9.04674	8.97556	9.42075	9.32207	9.44687	9.33869	9.09275	8.87936	9.11021	8.97408	FALSE	0	6.69e-05	0.000532	0.389	0.000113959	0.00128	-0.368	0.772644	0.895	0.0205	-0.128	-0.0938	-0.0733	0.295	TRUE	TRUE	FALSE	TRUE
P51807	Dynlt1	8.03568	7.65585	7.77998	7.87337	7.78574	8.04232	7.86246	7.64232	8.39415	8.2795	8.51412	8.0073	7.58646	7.51689	7.76669	7.66805	FALSE	0	0.000956536	0.00437	0.463	3.33e-05	0.000497	-0.664	0.0914064	0.284	-0.202	-0.0675	-0.0645	-0.266	0.398	TRUE	TRUE	FALSE	TRUE
P51660	Hsd17b4	9.73041	9.68718	9.71798	9.75087	9.63609	9.6837	9.70818	9.67864	10.1051	10.1738	10.1307	10.0858	9.74112	9.76868	9.7309	9.73314	FALSE	0	1.68e-09	1.52e-07	0.402	3.49e-09	5.51e-07	-0.38	0.472736	0.704	0.0219	-0.14	-0.0948	-0.0729	0.307	TRUE	TRUE	FALSE	TRUE
P51655	Gpc4	9.60752	9.56995	9.57294	9.65889	9.72193	9.64871	9.72347	9.69375	9.18487	9.10187	9.38659	9.31272	9.60556	9.521	9.57511	9.5269	FALSE	0	8.06e-06	0.0001	-0.356	3.44e-05	0.00051	0.311	0.401586	0.643	-0.0452	0.171	0.0766	0.0314	-0.279	TRUE	TRUE	FALSE	TRUE
P51642	Cntf	6.94014	6.95577	7.15914	7.44207	6.56285	6.30744	6.86611	6.715	7.83185	7.69148	7.84111	7.53055	6.86206	7.08165	6.7021	6.80084	TRUE	3	0.000445426	0.00237	0.599	1.25e-05	0.00024	-0.862	0.0660219	0.239	-0.263	-0.468	0.0436	-0.219	0.643	TRUE	TRUE	FALSE	TRUE
P51432	Plcb3	7.67178	7.71862	7.81146	7.74285	7.78915	7.73126	7.71676	7.74569	8.20863	8.19605	8.0527	8.16831	7.78501	7.77789	7.74065	7.85585	FALSE	0	8.66e-08	3.16e-06	0.42	4.64e-07	1.98e-05	-0.367	0.222346	0.472	0.0537	-0.111	-0.121	-0.0672	0.299	TRUE	TRUE	FALSE	TRUE
P51174	Acadl	10.9041	10.9799	10.8981	10.8802	10.8877	10.9094	10.9451	11.021	11.2952	11.3524	11.2879	11.3404	11.0155	11.0219	10.9714	10.9309	FALSE	0	3.21e-08	1.37e-06	0.403	3.35e-07	1.54e-05	-0.334	0.0839762	0.271	0.0693	-0.0993	-0.124	-0.0551	0.279	TRUE	TRUE	FALSE	TRUE
P50543	S100a11	8.13582	8.04404	8.09111	7.68417	7.97552	7.88228	8.35472	8.45844	9.06738	9.3226	8.95567	8.93896	8.39178	8.34567	8.35073	8.48291	FALSE	0	9e-07	1.82e-05	1.08	0.000138367	0.00149	-0.678	0.0081058	0.0753	0.404	-0.237	-0.416	-0.0123	0.666	TRUE	TRUE	FALSE	TRUE
P50228	Cxcl5	3.70974	3.46959	3.72711	2.64165	3.53344	3.18124	2.71844	3.70549	6.40683	6.49755	6.36943	6.10848	3.59391	3.85241	3.48044	4.20453	TRUE	2	9.92e-09	5.77e-07	2.96	6.19e-08	4.32e-06	-2.56	0.134941	0.353	0.396	-0.915	-0.813	-0.417	2.15	TRUE	TRUE	FALSE	TRUE
P50114	S100b	8.09255	8.66564	8.74974	8.54844	8.88676	8.27211	8.33356	8.54099	9.33581	9.51223	9.3071	9.29537	8.6699	8.50968	8.65211	8.73425	FALSE	0	2.99e-05	0.000279	0.849	0.000151119	0.0016	-0.721	0.380817	0.627	0.127	-0.248	-0.243	-0.115	0.606	TRUE	TRUE	FALSE	TRUE
P48453	Ppp3cb	13.512	13.6255	13.5692	13.5655	13.5925	13.5119	13.4826	13.6211	13.2199	13.3451	13.2481	13.2866	13.5544	13.5375	13.6385	13.6636	FALSE	0	9.87e-06	0.000116	-0.293	3.28e-06	8.72e-05	0.324	0.498891	0.722	0.0304	0.0537	0.0697	0.1	-0.223	TRUE	TRUE	FALSE	TRUE
P48036	Anxa5	12.6752	12.5733	12.5881	12.5218	12.5299	12.6728	12.6924	12.7619	13.467	13.4756	13.489	13.4027	12.7203	12.8139	12.8783	12.9196	FALSE	0	1.75e-10	2.95e-08	0.869	1.33e-08	1.36e-06	-0.626	0.000480658	0.0188	0.243	-0.222	-0.297	-0.0533	0.572	TRUE	TRUE	FALSE	TRUE
P48030	Tgfa	6.94419	6.80828	7.45459	6.72352	7.23017	7.14439	6.89783	6.99957	7.34871	7.38373	7.60368	7.48174	7.03389	6.62329	6.84981	7.1067	TRUE	2	0.00531096	0.017	0.472	0.00176651	0.0107	-0.551	0.589288	0.787	-0.0792	-0.0341	-0.119	-0.199	0.352	TRUE	TRUE	FALSE	TRUE
P47811	Mapk14	7.64481	7.7965	7.76793	7.87171	7.97775	7.87121	7.96174	7.8454	8.0858	8.13185	8.10955	8.07546	7.67857	7.88497	7.7163	7.84276	FALSE	0	3.1e-05	0.000287	0.33	4.31e-05	0.000604	-0.32	0.852641	0.941	0.0104	0.0226	-0.121	-0.111	0.209	TRUE	TRUE	FALSE	TRUE
P47708	Rph3a	11.9575	11.9737	11.995	12.0431	12.0097	11.9475	11.9876	11.9432	11.5369	11.6018	11.5122	11.5148	11.8772	11.7775	11.8776	11.8751	FALSE	0	3.33e-09	2.66e-07	-0.451	3.74e-07	1.7e-05	0.31	0.00125364	0.03	-0.14	0.133	0.153	0.0124	-0.298	TRUE	TRUE	FALSE	TRUE
P46938	Yap1	6.92655	6.64194	6.83024	6.49784	6.6044	6.59393	6.84826	7.0243	7.194	7.34559	7.11994	7.1751	6.65543	6.8833	6.63812	6.90336	FALSE	0	0.000596463	0.00297	0.485	0.00134654	0.0086	-0.439	0.683248	0.849	0.0459	-0.0999	-0.144	-0.0976	0.341	TRUE	TRUE	FALSE	TRUE
P46096	Syt1	14.9696	14.9798	14.9587	14.9898	14.9877	14.9406	14.8922	14.9676	14.596	14.5997	14.5768	14.5812	14.8745	14.8139	14.9266	14.8585	FALSE	0	5.34e-09	3.84e-07	-0.386	3.08e-07	1.47e-05	0.28	0.00412925	0.0517	-0.106	0.102	0.13	0.0238	-0.256	TRUE	TRUE	FALSE	TRUE
P45952	Acadm	9.90497	9.86403	9.99277	9.829	10.0687	9.85593	10.2975	10.2585	10.1803	10.4417	10.0749	10.1745	10.0011	9.98624	9.87285	9.8336	FALSE	0	0.00406835	0.0138	0.32	0.00705092	0.031	-0.294	0.787041	0.904	0.0258	0.0804	-0.142	-0.116	0.178	TRUE	TRUE	FALSE	TRUE
P43404	Zap70	7.15019	6.90817	6.66563	6.51984	6.61272	6.92799	7.04182	6.56447	6.26239	6.41769	6.44031	6.25046	6.69328	6.65098	6.77311	6.87375	FALSE	0	0.00266571	0.00979	-0.468	0.00709691	0.0311	0.405	0.631298	0.815	-0.0632	0.115	0.139	0.0757	-0.329	TRUE	TRUE	FALSE	TRUE
P42227	Stat3	8.6272	8.74274	8.7528	8.76254	8.75197	8.68317	8.72518	8.75727	9.33257	9.44175	9.40507	9.38911	8.89655	8.91632	8.83838	8.86521	FALSE	0	4.31e-11	1.2e-08	0.671	1.56e-09	2.97e-07	-0.513	0.000874518	0.0265	0.158	-0.201	-0.209	-0.0514	0.462	TRUE	TRUE	FALSE	TRUE
P42208	Septin2	12.3092	12.2851	12.3207	12.3058	12.223	12.3059	12.2978	12.2915	12.8033	12.8842	12.7677	12.805	12.3587	12.3758	12.3172	12.2863	FALSE	0	3.86e-10	5.29e-08	0.51	8.49e-10	2.13e-07	-0.481	0.397752	0.64	0.0293	-0.154	-0.128	-0.0991	0.381	TRUE	TRUE	FALSE	TRUE
P41731	Cd63	7.92337	8.32769	7.73178	7.78004	8.06267	8.00172	8.0728	7.59914	8.53627	8.64995	8.53665	8.65202	7.81009	7.72212	7.95997	8.14896	FALSE	0	0.000234415	0.00145	0.653	0.000153287	0.00162	-0.683	0.823128	0.923	-0.0304	-0.161	-0.154	-0.184	0.499	TRUE	TRUE	FALSE	TRUE
P41233	Abca1	7.09179	7.18456	7.15951	7.10525	7.06414	7.06465	7.04003	6.96212	8.16808	8.19678	8.04662	8.09251	7.01346	7.04466	7.21714	7.19253	FALSE	0	1.36e-11	6.59e-09	0.991	1.06e-11	1.1e-08	-1.01	0.724501	0.868	-0.0183	-0.32	-0.217	-0.236	0.773	TRUE	TRUE	FALSE	TRUE
P40936	Inmt	7.33243	6.93367	6.4806	6.68686	6.35853	6.82947	7.5104	6.89473	7.43435	7.61234	7.27167	7.65185	6.82321	6.9648	6.67644	6.739	FALSE	0	0.00868135	0.0254	0.634	0.00500362	0.024	-0.692	0.786466	0.903	-0.0575	-0.114	-0.154	-0.212	0.48	TRUE	TRUE	FALSE	TRUE
P40240	Cd9	10.9621	10.7841	10.7341	10.9364	10.5685	10.7772	10.6293	10.6736	11.5712	11.4581	11.586	11.6203	10.9333	11.155	11.1051	10.9625	FALSE	0	4.23e-08	1.72e-06	0.705	1.71e-06	5.14e-05	-0.52	0.0148002	0.103	0.185	-0.366	-0.174	0.0104	0.53	TRUE	TRUE	FALSE	TRUE
P36371	Tap2	6.68527	6.52109	6.51975	6.34236	6.47696	6.6836	6.58729	6.70588	7.32417	7.48193	7.11089	7.19008	6.70618	6.71884	6.78163	6.92913	FALSE	0	4.97e-07	1.17e-05	0.76	6.07e-05	0.000781	-0.493	0.00867077	0.0786	0.267	-0.184	-0.281	-0.0139	0.479	TRUE	TRUE	FALSE	TRUE
P35980	Rpl18	11.8346	11.7172	11.4489	11.6962	11.3686	11.4694	11.2894	11.4245	11.3325	11.1723	11.4185	11.373	11.563	11.4654	11.7947	11.6516	FALSE	0	0.00103359	0.00463	-0.35	0.00377159	0.0193	0.295	0.524319	0.74	-0.0556	-0.113	0.173	0.117	-0.177	TRUE	TRUE	FALSE	TRUE
P35802	Gpm6a	13.1767	12.9781	12.9634	12.9623	12.908	12.9638	12.8238	12.9627	12.499	12.5511	12.5875	12.546	12.9181	12.8135	13.021	12.9189	FALSE	0	5.51e-07	1.28e-05	-0.474	9.03e-06	0.000187	0.372	0.084851	0.273	-0.102	0.0649	0.171	0.0683	-0.304	TRUE	TRUE	FALSE	TRUE
P35700	Prdx1	12.3584	12.3696	12.3288	12.4031	12.3289	12.4034	12.2376	12.3121	12.8482	12.8804	12.8383	12.8611	12.3996	12.4896	12.5756	12.5303	FALSE	0	1.07e-08	6.05e-07	0.492	5.6e-07	2.2e-05	-0.358	0.00629024	0.0657	0.134	-0.19	-0.145	-0.0115	0.347	TRUE	TRUE	FALSE	TRUE
P35505	Fah	10.3428	10.3988	10.5409	10.5517	10.4231	10.2694	10.3984	10.4066	11.2198	11.2678	11.1109	11.1267	10.6166	10.7657	10.6805	10.5842	FALSE	0	6.44e-09	4.38e-07	0.723	4.09e-07	1.81e-05	-0.52	0.00389712	0.0502	0.203	-0.295	-0.21	-0.00725	0.512	TRUE	TRUE	FALSE	TRUE
P35276	Rab3d	13.2302	13.1184	12.9775	13.2207	12.8808	13.1264	13.0736	12.9387	12.747	12.6495	12.671	12.7151	12.9505	13.0275	13.0568	13.0533	FALSE	0	4.95e-06	6.86e-05	-0.441	0.000115926	0.0013	0.326	0.0852962	0.274	-0.115	0.0401	0.172	0.0572	-0.269	TRUE	TRUE	FALSE	TRUE
P34914	Ephx2	10.468	10.4378	10.4804	10.3936	10.4459	10.4058	10.4408	10.4569	10.9879	10.9843	10.9488	10.8938	10.4983	10.5742	10.5366	10.5293	FALSE	0	2.24e-10	3.47e-08	0.509	2.94e-09	4.85e-07	-0.419	0.0145512	0.102	0.0896	-0.155	-0.148	-0.0581	0.361	TRUE	TRUE	FALSE	TRUE
P33215	Nedd1	6.50873	6.4717	6.65066	6.15295	6.67314	6.44524	6.44465	6.64674	6.83404	6.96756	6.87274	6.86718	6.32978	6.51835	6.16804	6.44265	TRUE	2	0.000518244	0.00266	0.439	0.00010955	0.00125	-0.521	0.421975	0.658	-0.0813	-0.00969	-0.116	-0.197	0.323	TRUE	TRUE	FALSE	TRUE
P31786	Dbi	12.3781	12.4374	12.4727	12.3103	12.5614	12.3679	12.3988	12.4791	12.8958	12.9758	12.943	12.9717	12.5359	12.4981	12.4758	12.3852	FALSE	0	2.37e-08	1.1e-06	0.547	1.48e-07	8.37e-06	-0.473	0.1553	0.384	0.0741	-0.116	-0.168	-0.0942	0.379	TRUE	TRUE	FALSE	TRUE
P29788	Vtn	7.39564	6.88255	7.43269	6.9979	7.26689	7.09584	7.39905	7.3604	8.24258	8.14804	8.08839	8.15496	7.53328	7.54719	7.57315	7.36362	FALSE	0	3.44e-07	8.95e-06	0.981	3.37e-05	0.000502	-0.654	0.00987646	0.0834	0.327	-0.25	-0.353	-0.0258	0.628	TRUE	TRUE	FALSE	TRUE
P29758	Oat	10.8533	10.7754	10.7593	10.7586	10.7399	10.7871	10.7538	10.7573	11.2628	11.2505	11.272	11.2715	10.8074	10.8964	10.8281	10.8082	FALSE	0	3.51e-10	5.2e-08	0.478	1.45e-09	2.92e-07	-0.429	0.143921	0.365	0.0484	-0.152	-0.125	-0.0763	0.353	TRUE	TRUE	FALSE	TRUE
P29533	Vcam1	8.95628	9.00418	8.92475	9.0446	8.8882	8.95038	8.92082	8.9562	9.52804	9.55345	9.45937	9.58131	9.08865	8.99413	9.08485	9.00316	FALSE	0	9.13e-10	9.76e-08	0.548	4.23e-09	5.97e-07	-0.488	0.140158	0.359	0.0602	-0.192	-0.139	-0.0784	0.409	TRUE	TRUE	FALSE	TRUE
P29416	Hexa	8.84773	8.84879	8.79704	8.84647	8.80645	8.85001	8.74959	8.77629	9.36486	9.43318	9.28307	9.40684	8.84557	8.94801	8.9565	8.91724	FALSE	0	1.35e-09	1.33e-07	0.537	1.17e-08	1.23e-06	-0.455	0.053795	0.213	0.0818	-0.184	-0.145	-0.063	0.392	TRUE	TRUE	FALSE	TRUE
P29391	Ftl1	5.70814	5.4765	5.95919	5.73011	5.68944	5.75807	6.06518	6.08735	6.48252	6.65853	6.54385	6.40637	6.21013	6.09135	5.55733	5.96366	FALSE	0	4.07e-05	0.000355	0.804	0.00101209	0.00688	-0.567	0.106404	0.308	0.237	-0.124	-0.306	-0.0686	0.499	TRUE	TRUE	FALSE	TRUE
P29351	Ptpn6	6.48214	6.42506	6.44054	6.38694	6.45366	6.40063	6.41015	6.41563	7.3713	7.52292	7.3153	7.51723	6.63334	6.49118	6.63564	6.56982	FALSE	0	7.07e-12	3.95e-09	0.998	6.37e-11	2.94e-08	-0.849	0.00875243	0.079	0.149	-0.297	-0.283	-0.134	0.715	TRUE	TRUE	FALSE	TRUE
P28798	Grn	8.15681	8.47499	8.49292	8.47286	8.58208	8.33814	8.36554	8.40197	9.11696	9.31056	8.92972	9.33372	8.57479	8.69648	8.57258	8.52988	FALSE	0	9.83e-07	1.95e-05	0.773	2.49e-05	0.000397	-0.579	0.0589727	0.225	0.194	-0.225	-0.247	-0.0534	0.526	TRUE	TRUE	FALSE	TRUE
P28665	Mug1	10.4788	10.1755	10.1484	10.0936	10.022	10.491	10.79	10.6507	10.8722	10.9352	10.7478	10.8666	10.1653	10.0113	10.1279	10.2754	FALSE	0	0.000287516	0.00169	0.631	9.47e-05	0.0011	-0.71	0.558982	0.766	-0.0791	0.0602	-0.204	-0.283	0.427	TRUE	TRUE	FALSE	TRUE
P28663	Napb	12.9851	12.9461	12.9836	12.9893	12.9943	13.0202	12.9142	12.9433	12.6855	12.675	12.71	12.7378	12.9109	12.9557	12.9767	13.0422	FALSE	0	1.54e-06	2.77e-05	-0.274	1.87e-06	5.53e-05	0.269	0.895675	0.961	-0.00464	0.0637	0.0716	0.067	-0.202	TRUE	TRUE	FALSE	TRUE
P28661	Septin4	12.3362	12.4484	12.4822	12.4517	12.4629	12.4126	12.3364	12.4676	12.7514	12.8453	12.7244	12.7712	12.4517	12.5419	12.3972	12.399	FALSE	0	2.94e-06	4.6e-05	0.343	5.38e-06	0.000126	-0.326	0.705254	0.858	0.0178	-0.0976	-0.0879	-0.0701	0.256	TRUE	TRUE	FALSE	TRUE
P28650	Adss1	10.8006	10.9359	11.0013	10.9166	10.9462	10.8428	10.786	10.8094	11.4883	11.5122	11.4759	11.4238	10.9241	10.9069	10.9603	10.8759	FALSE	0	5.94e-09	4.15e-07	0.561	6.4e-09	7.88e-07	-0.558	0.945069	0.981	0.00319	-0.192	-0.124	-0.121	0.437	TRUE	TRUE	FALSE	TRUE
P27870	Vav1	6.15218	6.30225	6.5299	6.22508	6.71833	6.36814	6.2492	6.41728	6.61393	6.477	6.64218	6.75083	5.98525	6.26458	6.11616	5.89354	FALSE	0	0.0105725	0.0297	0.319	0.000146152	0.00155	-0.556	0.0453951	0.193	-0.237	0.0816	-0.0543	-0.292	0.264	TRUE	TRUE	FALSE	TRUE
P27601	Gna13	11.4154	11.3949	11.4638	11.4221	11.408	11.4323	11.3493	11.4028	11.7775	11.7239	11.8052	11.7974	11.4125	11.4209	11.4607	11.3934	FALSE	0	1.79e-08	8.87e-07	0.352	1.66e-08	1.65e-06	-0.354	0.945063	0.981	-0.00218	-0.107	-0.081	-0.0831	0.271	TRUE	TRUE	FALSE	TRUE
P27573	Mpz	7.80864	7.71063	7.54428	7.76762	7.64862	7.64953	7.61798	7.66555	7.00478	7.22624	7.07245	7.29349	7.32656	7.95131	7.96591	7.32159	TRUE	10	0.000969684	0.00441	-0.559	0.00257135	0.0143	0.492	0.629347	0.814	-0.0665	0.109	0.172	0.105	-0.387	TRUE	TRUE	FALSE	TRUE
P26231	Ctnna1	11.4668	11.3751	11.3269	11.3788	11.3154	11.4037	11.4382	11.3575	11.792	11.8467	11.778	11.8172	11.4541	11.4855	11.5599	11.5306	FALSE	0	3.19e-08	1.37e-06	0.422	1.94e-06	5.68e-05	-0.301	0.00781391	0.0739	0.121	-0.142	-0.134	-0.0129	0.288	TRUE	TRUE	FALSE	TRUE
P26151	Fcgr1	6.98067	7.35389	7.25359	7.42371	7.45797	7.5097	7.50493	7.55333	7.97045	8.12228	7.72796	7.32187	7.37592	7.26543	7.35015	7.4254	FALSE	0	0.00140878	0.00592	0.533	0.00629806	0.0286	-0.431	0.464278	0.697	0.101	0.0317	-0.222	-0.121	0.311	TRUE	TRUE	FALSE	TRUE
P26043	Rdx	12.875	12.7178	12.7532	12.7049	12.7225	12.6527	12.711	12.604	13.213	13.2576	13.2266	13.2318	12.7892	12.8346	12.8577	12.8646	FALSE	0	1.32e-08	7.12e-07	0.47	1.15e-07	6.93e-06	-0.396	0.089699	0.281	0.0738	-0.203	-0.113	-0.0395	0.356	TRUE	TRUE	FALSE	TRUE
P26041	Msn	10.3835	10.1714	10.1631	10.1732	10.0253	10.2662	10.1899	10.261	11.1862	11.2546	11.1473	11.259	10.3895	10.4533	10.5134	10.421	FALSE	0	1.51e-10	2.78e-08	0.989	4.36e-09	5.97e-07	-0.767	0.00261698	0.0428	0.222	-0.33	-0.293	-0.0718	0.696	TRUE	TRUE	FALSE	TRUE
P26040	Ezr	11.0716	10.8743	10.9416	10.8972	10.9226	10.8959	11.0922	11.1041	11.5349	11.5244	11.5334	11.3871	11.0607	11.1264	11.111	11.1503	FALSE	0	1.6e-07	4.94e-06	0.549	1.07e-05	0.000213	-0.383	0.0120973	0.0921	0.166	-0.136	-0.193	-0.0271	0.356	TRUE	TRUE	FALSE	TRUE
P26039	Tln1	10.4113	10.2882	10.2744	10.2988	10.2142	10.3306	10.3982	10.363	10.888	10.8695	10.818	10.8584	10.4266	10.4838	10.527	10.517	FALSE	0	6.07e-09	4.2e-07	0.54	6.97e-07	2.64e-05	-0.37	0.00162927	0.0343	0.17	-0.171	-0.18	-0.00933	0.361	TRUE	TRUE	FALSE	TRUE
P25911	Lyn	7.88874	7.89985	7.72386	7.826	7.76381	8.00782	7.8521	7.94012	8.2213	8.2946	8.21924	8.22399	7.97759	7.8919	7.9383	7.8787	FALSE	0	2e-06	3.42e-05	0.405	2.87e-05	0.000443	-0.318	0.12005	0.331	0.087	-0.0808	-0.137	-0.0501	0.268	TRUE	TRUE	FALSE	TRUE
P25799	Nfkb1	6.76021	6.61133	6.73336	6.61618	7.01278	6.78583	6.76379	6.81741	7.01217	7.0324	6.98374	6.98146	6.66487	6.76476	6.71169	6.79802	FALSE	0	3.64e-05	0.000324	0.322	0.000223483	0.00214	-0.268	0.333451	0.582	0.0546	0.0293	-0.135	-0.0808	0.187	TRUE	TRUE	FALSE	TRUE
P24549	Aldh1a1	10.185	10.0845	9.9759	10.0348	9.99438	10.1933	10.1713	10.3413	10.6884	10.7734	10.5969	10.6098	10.1243	10.1588	10.2413	10.1822	FALSE	0	3.43e-07	8.95e-06	0.597	3.48e-06	9.15e-05	-0.49	0.132621	0.35	0.107	-0.0972	-0.202	-0.0956	0.395	TRUE	TRUE	FALSE	TRUE
P24529	Th	6.85251	6.97539	7.01688	6.92655	7.02356	6.78739	7.07911	6.94323	7.36038	7.23634	7.56783	7.32961	6.902	7.08462	6.90893	6.7699	FALSE	0	0.000108956	0.000789	0.431	6.05e-05	0.000781	-0.457	0.74942	0.883	-0.0265	-0.0894	-0.105	-0.131	0.326	TRUE	TRUE	FALSE	TRUE
P24472	Gsta4	10.1446	10.1652	9.74268	9.9196	9.70235	9.71824	9.90734	9.91134	9.76014	9.70497	9.58064	9.78783	9.84237	9.95219	10.1059	10.0075	FALSE	0	0.00761636	0.0229	-0.285	0.0107942	0.0431	0.269	0.863399	0.946	-0.016	-0.0622	0.121	0.105	-0.164	TRUE	TRUE	FALSE	TRUE
P24457	Cyp2d11	8.10396	8.16009	8.28007	8.12855	8.35026	8.14327	8.28813	8.26036	8.68767	8.74944	8.71795	8.75362	8.14569	8.20199	8.21869	8.1766	FALSE	0	8.56e-09	5.29e-07	0.559	1.29e-08	1.34e-06	-0.541	0.711838	0.861	0.0176	-0.0749	-0.167	-0.15	0.392	TRUE	TRUE	FALSE	TRUE
P24452	Capg	7.77746	7.64877	7.62361	7.40712	7.17948	7.57446	7.50748	7.38776	9.21367	8.98087	9.22017	9.46659	7.7945	7.89623	8.04357	7.96357	FALSE	0	4.79e-10	6.11e-08	1.61	8.07e-09	9.61e-07	-1.3	0.0119425	0.0918	0.31	-0.631	-0.429	-0.118	1.18	TRUE	TRUE	FALSE	TRUE
P23927	Cryab	11.294	11.2744	11.184	11.1303	11.1396	11.2055	11.2295	11.2018	12.1999	12.2885	12.0507	12.0738	11.2676	11.2741	11.3774	11.3203	FALSE	0	6.5e-11	1.5e-08	0.933	2.52e-10	8.31e-08	-0.843	0.119845	0.33	0.0891	-0.275	-0.249	-0.16	0.684	TRUE	TRUE	FALSE	TRUE
P23819	Gria2	12.3875	12.4267	12.3788	12.3988	12.4086	12.3629	12.4379	12.4521	12.0456	12.0327	12.0057	12.0607	12.3348	12.2618	12.3922	12.3289	FALSE	0	2.75e-08	1.24e-06	-0.362	3.75e-07	1.7e-05	0.293	0.0567257	0.22	-0.0686	0.121	0.103	0.0347	-0.259	TRUE	TRUE	FALSE	TRUE
P23818	Gria1	12.3067	12.3982	12.2214	12.3681	12.2908	12.3789	12.2479	12.3982	11.9742	12.0184	11.9342	12.0078	12.2734	12.1519	12.4205	12.3158	FALSE	0	2.95e-05	0.000277	-0.34	8.36e-05	0.001	0.307	0.565087	0.771	-0.0332	0.0973	0.0919	0.0588	-0.248	TRUE	TRUE	FALSE	TRUE
P23492	Pnp	9.8807	9.98614	9.90022	9.9682	9.8058	9.82939	9.87552	9.95193	10.6461	10.7405	10.5881	10.6924	9.94445	9.98159	10.1211	9.97416	FALSE	0	4.02e-10	5.32e-08	0.733	1.57e-09	2.97e-07	-0.661	0.162064	0.393	0.0715	-0.252	-0.184	-0.113	0.549	TRUE	TRUE	FALSE	TRUE
P23242	Gja1	11.6546	11.7575	11.8099	11.7611	11.7288	11.6366	11.6638	11.7258	12.4323	12.527	12.369	12.4464	11.7609	11.7219	11.6903	11.7148	FALSE	0	1.02e-10	2.12e-08	0.698	6.48e-11	2.94e-08	-0.722	0.576822	0.778	-0.0238	-0.211	-0.154	-0.178	0.544	TRUE	TRUE	FALSE	TRUE
P22933	Gabrd	7.79262	8.02056	8.00347	7.81315	8.27996	8.12387	8.1092	8.24575	7.42844	7.35421	7.44028	7.50686	7.93036	7.73569	7.81115	7.88423	FALSE	0	2.88e-06	4.52e-05	-0.475	1.56e-05	0.000282	0.408	0.309549	0.557	-0.0671	0.347	0.065	-0.00213	-0.41	TRUE	TRUE	FALSE	TRUE
P22437	Ptgs1	7.16205	6.94091	6.90736	7.1201	6.91403	7.11164	7.19125	6.95124	7.42043	7.47518	7.20485	7.30471	6.94792	7.00031	6.79771	6.91555	FALSE	0	0.00133584	0.00569	0.319	8.29e-05	0.000999	-0.436	0.164684	0.395	-0.117	-0.0433	-0.0527	-0.17	0.266	TRUE	TRUE	FALSE	TRUE
P21460	Cst3	10.3733	10.737	10.5543	10.5407	10.691	10.7084	10.7295	10.7709	10.995	11.0586	10.8959	11.0241	10.6801	10.6321	10.5958	10.7053	FALSE	0	4.32e-06	6.26e-05	0.442	7.03e-05	0.000884	-0.34	0.118601	0.329	0.102	-0.00579	-0.179	-0.0774	0.263	TRUE	TRUE	FALSE	TRUE
P20491	Fcer1g	6.70184	5.96609	6.93884	6.22157	6.83062	6.52289	7.02202	6.38686	8.07	7.0059	8.03725	7.04038	7.11256	6.44991	6.85826	6.51374	FALSE	0	0.00166735	0.00674	1.08	0.0119842	0.0469	-0.805	0.338765	0.588	0.277	-0.164	-0.398	-0.121	0.683	TRUE	TRUE	FALSE	TRUE
P20352	F3	7.05174	7.5263	7.18567	7.3619	7.25623	7.24221	7.03839	7.34823	7.59038	7.64606	7.57958	7.54069	7.16005	7.10725	7.19476	7.23659	FALSE	0	0.00298355	0.0107	0.308	0.000265302	0.00244	-0.415	0.234742	0.483	-0.107	-0.0954	-0.0352	-0.142	0.273	TRUE	TRUE	FALSE	TRUE
P20060	Hexb	11.4547	11.5698	11.389	11.4758	11.3624	11.4241	11.2786	11.3465	12.2498	12.1596	12.1205	12.2977	11.4664	11.6031	11.5951	11.5488	FALSE	0	7.92e-10	8.8e-08	0.735	3.7e-09	5.59e-07	-0.654	0.13493	0.353	0.081	-0.293	-0.174	-0.093	0.561	TRUE	TRUE	FALSE	TRUE
P19324	Serpinh1	9.80275	9.54067	9.37447	9.39322	9.31691	9.43365	9.94371	9.67502	10.0343	10.2329	10.0339	10.0053	9.5872	9.64138	9.47775	9.58785	FALSE	0	0.000441836	0.00235	0.549	0.000922177	0.00643	-0.503	0.709885	0.86	0.0458	-0.1	-0.165	-0.119	0.384	TRUE	TRUE	FALSE	TRUE
P19253	Rpl13a	10.7964	10.4081	10.1775	10.3523	9.86585	9.71097	10.0488	10.1297	9.61231	9.62607	9.07335	9.57574	9.89506	10.1764	10.3821	10.1046	FALSE	0	1.89e-05	0.000193	-0.962	0.000626066	0.00472	0.668	0.0745998	0.255	-0.294	-0.0571	0.438	0.144	-0.524	TRUE	TRUE	FALSE	TRUE
P18531	Ighv3-6	5.63397	5.32021	5.29336	5.45374	5.4259	5.70953	5.48492	5.09814	6.35498	6.26055	6.80133	6.09006	5.74132	5.5144	5.81253	5.49368	TRUE	3	1.7e-05	0.000178	0.951	0.000219341	0.00211	-0.736	0.172169	0.406	0.215	-0.288	-0.293	-0.0776	0.659	TRUE	TRUE	FALSE	TRUE
P18242	Ctsd	10.8055	10.7341	10.5637	10.6272	10.6045	10.5298	10.6134	10.6151	11.3561	11.3303	11.2819	11.4342	10.7609	10.8734	10.9847	10.9081	FALSE	0	1.23e-08	6.67e-07	0.668	9.89e-07	3.42e-05	-0.469	0.00367163	0.0496	0.199	-0.286	-0.194	0.00533	0.474	TRUE	TRUE	FALSE	TRUE
P17563	Selenbp1	10.9318	10.9554	11.0175	11.0152	10.945	10.9787	10.9712	11.059	11.396	11.4888	11.5154	11.4203	11.1386	11.2435	11.1995	11.067	FALSE	0	3.24e-08	1.38e-06	0.475	1.03e-05	0.000206	-0.293	0.000975303	0.0281	0.182	-0.158	-0.166	0.0157	0.309	TRUE	TRUE	FALSE	TRUE
P17225	Ptbp1	10.2818	9.88728	9.92393	10.0293	9.81991	10.1501	10.3124	10.0977	10.7323	10.7442	10.7904	10.7864	10.1552	10.2387	10.2622	10.1863	FALSE	0	1.58e-06	2.82e-05	0.733	3.53e-05	0.000522	-0.553	0.0737133	0.253	0.18	-0.18	-0.244	-0.0643	0.488	TRUE	TRUE	FALSE	TRUE
P16460	Ass1	10.4931	10.4106	10.4634	10.3982	10.3277	10.3927	10.2975	10.3637	10.9629	11.0038	10.9876	10.8922	10.4537	10.5507	10.6316	10.5737	FALSE	0	5.42e-09	3.86e-07	0.52	1.16e-07	6.93e-06	-0.409	0.01886	0.118	0.111	-0.23	-0.134	-0.0228	0.386	TRUE	TRUE	FALSE	TRUE
P16332	Mmut	9.93626	9.91168	9.85311	9.85337	9.81269	9.82007	9.845	9.917	10.2695	10.281	10.3386	10.1744	9.82031	9.95769	9.89016	9.88023	FALSE	0	3.37e-07	8.85e-06	0.377	3.21e-07	1.51e-05	-0.379	0.97198	0.99	-0.00151	-0.124	-0.084	-0.0855	0.293	TRUE	TRUE	FALSE	TRUE
P16110	Lgals3	6.8361	6.50062	6.36467	6.11879	6.23764	6.27714	6.98393	6.43822	7.81313	7.79621	7.64431	7.95329	6.71684	6.86633	6.86152	6.62774	FALSE	0	7.3e-07	1.58e-05	1.35	1.48e-05	0.00027	-1.03	0.0711411	0.248	0.313	-0.393	-0.422	-0.109	0.924	TRUE	TRUE	FALSE	TRUE
P16092	Fgfr1	8.04282	7.68529	7.75086	7.8628	7.89202	7.85702	7.95417	8.11652	8.06781	8.2194	8.20291	8.14925	7.74337	7.85494	7.85392	7.70868	FALSE	0	0.000683745	0.00331	0.324	0.000216203	0.00209	-0.37	0.556112	0.764	-0.0452	0.0198	-0.0997	-0.145	0.225	TRUE	TRUE	FALSE	TRUE
P16014	Chgb	8.9204	8.87503	8.83551	8.8386	8.87294	8.81665	8.94882	8.79583	8.38172	8.3622	8.32563	8.47948	8.84106	8.88381	9.05599	8.99357	FALSE	0	2.17e-07	6.26e-06	-0.48	3.45e-08	2.85e-06	0.556	0.162655	0.394	0.0762	0.0944	0.103	0.179	-0.377	TRUE	TRUE	FALSE	TRUE
P15626	Gstm2	9.4865	9.40319	9.42273	9.29065	9.29368	9.36597	9.55952	9.52189	9.9178	9.9468	9.8802	9.80617	9.56901	9.61829	9.54446	9.53623	FALSE	0	8.55e-07	1.75e-05	0.487	8.2e-05	0.000991	-0.321	0.0133366	0.0974	0.166	-0.137	-0.172	-0.0057	0.315	TRUE	TRUE	FALSE	TRUE
P15379	Cd44	7.85086	7.81998	7.79257	7.61239	7.27022	7.13021	7.84459	8.10813	10.0004	10.2631	9.85262	10.0408	8.02991	7.74121	8.39585	8.36625	FALSE	0	1.22e-08	6.65e-07	2.27	1.12e-07	6.86e-06	-1.91	0.0820075	0.268	0.364	-0.794	-0.613	-0.249	1.66	TRUE	TRUE	FALSE	TRUE
P14426	H2-D1	8.1337	8.05987	7.92484	7.99669	7.99881	7.99856	8.06848	8.03966	7.49667	7.94962	7.33401	7.12044	7.77575	7.7004	7.96878	7.94523	TRUE	12	0.000693897	0.00335	-0.554	0.0114482	0.0452	0.372	0.179089	0.415	-0.181	0.182	0.184	0.00307	-0.369	TRUE	TRUE	FALSE	TRUE
P13597	Icam1	5.82514	6.95874	6.65808	7.07457	7.0985	6.09715	6.98892	6.70583	8.09394	8.23254	8.02712	8.10841	7.2027	7.06786	6.95649	6.76746	FALSE	0	2.79e-05	0.000264	1.49	0.000436573	0.00358	-1.12	0.153581	0.381	0.369	-0.394	-0.487	-0.118	0.999	TRUE	TRUE	FALSE	TRUE
P13020	Gsn	9.89788	9.93026	9.75335	9.78255	9.83027	9.87921	9.96232	9.88824	10.5551	10.6498	10.6162	10.5357	9.97514	9.95507	10.0018	10.004	FALSE	0	9.73e-11	2.12e-08	0.748	1.65e-09	2.97e-07	-0.605	0.00619878	0.0651	0.143	-0.186	-0.235	-0.0921	0.513	TRUE	TRUE	FALSE	TRUE
P11928	Oas1a	6.89521	6.58813	6.81961	7.27397	6.65421	6.82413	6.78769	5.7623	8.17062	8.16612	8.1246	8.05073	7.22301	6.98582	7.19801	7.1234	TRUE	5	1.64e-05	0.000174	1.23	0.000144176	0.00154	-0.995	0.237997	0.486	0.238	-0.658	-0.271	-0.0329	0.963	TRUE	TRUE	FALSE	TRUE
P11859	Agt	7.36548	7.5663	7.37834	7.42115	7.84916	7.73128	8.03548	7.93237	7.87626	8.02824	7.98705	7.99647	7.82306	7.62114	7.54178	7.70326	FALSE	0	2.77e-06	4.38e-05	0.539	0.000939648	0.00651	-0.3	0.00493609	0.057	0.239	0.146	-0.308	-0.0687	0.231	TRUE	TRUE	FALSE	TRUE
P11835	Itgb2	7.99847	8.03991	8.23383	8.13763	8.11689	8.20898	8.18639	8.14204	9.23093	9.26608	9.07109	9.34732	8.27435	8.24913	8.28175	8.39531	FALSE	0	2.9e-11	1.03e-08	1.13	3.92e-10	1.24e-07	-0.929	0.00604356	0.0645	0.198	-0.285	-0.346	-0.149	0.78	TRUE	TRUE	FALSE	TRUE
P10833	Rras	7.83804	7.87661	7.97357	7.97971	7.9364	7.98171	7.86587	7.99006	8.20735	8.30801	8.19465	8.31367	7.8201	8.05027	7.98468	7.99475	FALSE	0	1.79e-05	0.000185	0.339	7.88e-05	0.00096	-0.293	0.410192	0.649	0.0455	-0.0762	-0.103	-0.0573	0.236	TRUE	TRUE	FALSE	TRUE
P10810	Cd14	4.51164	3.56831	4.76705	4.35804	3.67571	4.69408	4.42433	3.97524	6.10344	5.67647	6.12823	5.9761	4.84934	5.15698	4.89321	4.98806	TRUE	6	6.21e-06	8.12e-05	1.67	0.000923048	0.00643	-0.999	0.0140746	0.1	0.671	-0.667	-0.558	0.113	1.11	TRUE	TRUE	FALSE	TRUE
P10649	Gstm1	12.1606	12.2395	12.1876	12.1604	12.3724	12.135	12.1051	12.1951	12.5585	12.5874	12.4231	12.5564	12.1493	12.2299	12.3089	12.2593	FALSE	0	2.87e-05	0.00027	0.344	0.000136597	0.00148	-0.294	0.395958	0.639	0.0498	-0.0874	-0.102	-0.0524	0.242	TRUE	TRUE	FALSE	TRUE
P0C7L0	Wipf3	12.1392	12.0182	11.8961	12.1255	12.0276	12.1761	12.314	12.1333	11.7642	11.6846	11.7746	11.7733	12.0082	12.0002	12.0897	12.119	FALSE	0	0.000326593	0.00186	-0.296	0.000245101	0.00229	0.305	0.88154	0.956	0.00952	0.16	0.042	0.0515	-0.254	TRUE	TRUE	FALSE	TRUE
P0C673	Igsf11	6.62294	6.70267	6.52904	6.44288	6.43078	6.49631	6.62788	6.84215	6.9334	7.01483	6.96854	6.85493	6.70526	6.66516	6.62263	6.51917	FALSE	0	0.000435058	0.00233	0.369	0.00158863	0.00976	-0.315	0.51734	0.735	0.0537	-0.0869	-0.112	-0.0581	0.257	TRUE	TRUE	FALSE	TRUE
P09055	Itgb1	9.16125	9.12124	9.19377	9.12783	9.2616	9.24688	9.38731	9.30401	9.6772	9.86195	9.68189	9.7424	9.26554	9.34918	9.28339	9.33739	FALSE	0	2.66e-09	2.22e-07	0.59	1.42e-07	8.18e-06	-0.432	0.00342753	0.0479	0.158	-0.0752	-0.224	-0.0663	0.366	TRUE	TRUE	FALSE	TRUE
P08226	Apoe	10.5777	10.6493	10.55	10.5652	10.5138	10.4645	10.4608	10.5992	11.3895	11.3758	11.3654	11.4903	10.6066	10.6579	10.6568	10.657	FALSE	0	6.23e-12	3.77e-09	0.82	1.73e-11	1.57e-08	-0.761	0.160528	0.391	0.059	-0.277	-0.201	-0.142	0.619	TRUE	TRUE	FALSE	TRUE
P08101	Fcgr2	6.93701	7.24072	6.57599	6.88025	6.75917	6.65008	7.36807	6.85769	7.80127	8.17561	7.9246	7.78503	7.31298	6.81393	6.89232	6.57223	FALSE	0	6.27e-05	0.000506	1.01	5.65e-05	0.00074	-1.02	0.953935	0.985	-0.0106	-0.25	-0.251	-0.261	0.762	TRUE	TRUE	FALSE	TRUE
P08003	Pdia4	9.47621	9.37558	9.32931	9.4238	9.28732	9.37188	9.5222	9.33801	9.82939	9.84745	9.82889	9.86898	9.4481	9.59442	9.51585	9.57593	FALSE	0	4.17e-07	1.05e-05	0.442	2.36e-05	0.000385	-0.31	0.0196338	0.12	0.132	-0.16	-0.138	-0.00601	0.304	TRUE	TRUE	FALSE	TRUE
P07758	Serpina1a	10.3081	10.0749	9.79852	9.86613	9.84486	10.0585	10.3674	10.3438	10.4266	10.5443	10.3441	10.3833	9.80987	9.80675	9.85104	10.099	FALSE	0	0.0051541	0.0166	0.413	0.000765216	0.00556	-0.533	0.351737	0.598	-0.12	0.0332	-0.109	-0.229	0.304	TRUE	TRUE	FALSE	TRUE
P07214	Sparc	8.5529	8.59183	8.4655	8.46319	8.68368	8.50772	8.55274	8.54456	8.77832	8.87818	8.87967	8.94073	8.55541	8.56325	8.4672	8.5631	FALSE	0	3.62e-06	5.43e-05	0.351	6.75e-06	0.00015	-0.332	0.699624	0.856	0.0189	-0.0521	-0.106	-0.087	0.245	TRUE	TRUE	FALSE	TRUE
P06837	Gap43	11.7247	11.9072	11.5797	11.84	11.547	11.7473	11.4455	11.7719	11.2748	11.2169	11.3424	11.557	11.5657	11.6903	11.9161	12.0315	FALSE	0	0.00224606	0.00854	-0.415	0.00114473	0.00753	0.453	0.738271	0.875	0.038	-0.00697	0.128	0.166	-0.287	TRUE	TRUE	FALSE	TRUE
P06728	Apoa4	8.3347	8.14994	7.78596	7.8052	7.83623	8.17118	8.37097	8.27672	8.70099	8.82736	8.68947	8.6627	8.0897	8.21349	8.33642	8.32867	FALSE	0	6.93e-05	0.000546	0.701	0.00198515	0.0116	-0.478	0.0990063	0.296	0.223	-0.122	-0.267	-0.0442	0.434	TRUE	TRUE	FALSE	TRUE
P05555	Itgam	8.91178	8.89194	8.84415	8.77457	8.79261	8.9528	8.88147	9.06552	9.80375	9.79741	9.71702	9.81395	9.09321	9.06278	9.07015	9.02835	FALSE	0	3.49e-11	1.07e-08	0.927	1.06e-09	2.48e-07	-0.719	0.00113464	0.0288	0.208	-0.233	-0.301	-0.0927	0.627	TRUE	TRUE	FALSE	TRUE
P04441	Cd74	8.2961	8.30036	8.19636	8.23865	8.1401	8.21168	8.23175	8.25239	7.75296	7.11591	7.46544	7.64434	8.02758	7.95605	8.19823	8.10927	TRUE	12	2.88e-06	4.52e-05	-0.763	5.75e-05	0.000749	0.578	0.0916042	0.284	-0.185	0.2	0.249	0.0642	-0.514	TRUE	TRUE	FALSE	TRUE
P02798	Mt2	5.93393	6.63953	6.42978	6.66134	6.93547	7.20222	6.91905	7.07358	7.61614	7.94201	7.40505	8.14905	6.9869	6.80633	6.97556	7.02217	FALSE	0	8.82e-07	1.79e-05	1.36	0.000176762	0.0018	-0.83	0.00605233	0.0645	0.532	-0.0111	-0.627	-0.0959	0.734	TRUE	TRUE	FALSE	TRUE
P01901	H2-K1	6.45251	6.77473	6.25769	6.21552	6.58287	6.46805	6.49965	6.61091	7.63425	7.8949	7.52456	7.73098	6.55448	6.57167	6.72557	6.50616	FALSE	0	9.8e-09	5.77e-07	1.27	5.73e-08	4.16e-06	-1.11	0.147084	0.37	0.164	-0.272	-0.388	-0.223	0.883	TRUE	TRUE	FALSE	TRUE
P01899	H2-D1	8.41529	8.07648	7.91787	7.9755	7.82742	8.1604	8.39683	8.29647	9.03967	8.94471	8.76403	9.17201	8.25668	8.5732	8.41811	8.35776	FALSE	0	9.38e-06	0.000112	0.884	0.000594439	0.00455	-0.579	0.0358556	0.166	0.305	-0.242	-0.316	-0.0106	0.568	TRUE	TRUE	FALSE	TRUE
P01887	B2m	7.48778	7.36258	7.48737	7.18554	7.47983	7.01287	7.38986	7.50807	8.52237	8.71844	8.18851	8.57277	7.38783	7.62653	7.49947	7.78479	FALSE	0	4.93e-07	1.17e-05	1.12	4.53e-06	0.000113	-0.926	0.15526	0.384	0.194	-0.353	-0.32	-0.126	0.8	TRUE	TRUE	FALSE	TRUE
P01831	Thy1	14.017	14.123	14.1604	14.0655	14.0316	14.0958	13.9741	14.0587	13.7155	13.6302	13.7961	13.8142	14.123	14.0057	14.0251	13.963	FALSE	0	5.07e-06	6.98e-05	-0.352	4.1e-05	0.000584	0.29	0.230089	0.479	-0.0623	0.0651	0.117	0.0543	-0.236	TRUE	TRUE	FALSE	TRUE
P01786		5.5871	5.58077	5.44622	5.57847	5.47181	5.56399	5.60762	5.46238	6.26	5.79729	5.79688	5.89311	5.56087	4.94374	5.64399	5.48737	TRUE	11	0.0104276	0.0294	0.389	0.00127297	0.00819	-0.528	0.308398	0.556	-0.139	-0.0787	-0.057	-0.196	0.332	TRUE	TRUE	FALSE	TRUE
P01631		7.33028	7.37357	7.44966	7.32707	7.39663	7.34561	7.45847	7.49507	7.87325	7.77288	7.54127	7.51506	7.33469	7.38926	7.1678	7.33308	TRUE	9	0.00108252	0.0048	0.305	0.000209019	0.00205	-0.369	0.406173	0.647	-0.0639	-0.02	-0.0738	-0.138	0.232	TRUE	TRUE	FALSE	TRUE
P00920	Ca2	13.145	13.591	13.5477	13.4253	13.6831	13.3369	13.4849	13.3973	14.1469	14.2831	14.2052	14.1419	13.6808	13.6575	13.5611	13.6886	FALSE	0	5.88e-07	1.34e-05	0.767	2.64e-05	0.000417	-0.547	0.0279851	0.144	0.22	-0.21	-0.259	-0.039	0.508	TRUE	TRUE	FALSE	TRUE
O89026	Robo1	9.67451	9.66227	9.60976	9.64091	9.68433	9.70113	9.62027	9.66779	9.3529	9.33085	9.24312	9.31475	9.59753	9.49012	9.67137	9.63827	FALSE	0	8.08e-07	1.69e-05	-0.336	4.71e-06	0.000115	0.289	0.259056	0.508	-0.0475	0.112	0.0906	0.0431	-0.246	TRUE	TRUE	FALSE	TRUE
O89023	Tpp1	9.15985	8.88879	8.96501	8.98426	8.69754	8.80733	8.99532	8.90303	9.53811	9.54491	9.5155	9.60845	9.18816	9.42416	9.27912	9.12976	FALSE	0	3.16e-06	4.86e-05	0.552	0.00136121	0.00865	-0.296	0.00401775	0.0509	0.256	-0.314	-0.165	0.091	0.387	TRUE	TRUE	FALSE	TRUE
O89017	Lgmn	9.95341	9.74755	9.69295	9.99275	9.69337	9.99065	9.87588	9.52922	10.4194	10.4007	10.3819	10.2505	9.89662	9.84062	10.1162	9.88573	FALSE	0	0.000107937	0.000783	0.516	0.000593227	0.00454	-0.428	0.380585	0.627	0.0881	-0.207	-0.133	-0.0444	0.384	TRUE	TRUE	FALSE	TRUE
O88998	Olfm1	9.56178	9.84553	9.86218	9.82629	9.85462	9.75872	9.7291	9.79912	9.18671	9.17787	9.3399	9.18775	9.66592	9.56016	9.60425	9.64053	FALSE	0	3.73e-07	9.54e-06	-0.551	1.7e-05	0.000298	0.395	0.0245005	0.134	-0.156	0.185	0.174	0.0177	-0.377	TRUE	TRUE	FALSE	TRUE
O88935	Syn1	15.3744	15.46	15.4996	15.538	15.4932	15.4859	15.4348	15.4456	15.1756	15.1087	15.2219	15.1497	15.4587	15.3571	15.4814	15.5061	FALSE	0	4.92e-06	6.86e-05	-0.304	9.38e-06	0.000192	0.287	0.69355	0.853	-0.0172	0.078	0.0811	0.0639	-0.223	TRUE	TRUE	FALSE	TRUE
O88737	Bsn	11.6488	11.6919	11.6492	11.669	11.6351	11.7197	11.6544	11.6996	11.2605	11.3045	11.2898	11.3015	11.6012	11.5584	11.6433	11.6926	FALSE	0	2.01e-08	9.61e-07	-0.376	8.61e-08	5.58e-06	0.335	0.242861	0.49	-0.0408	0.113	0.101	0.0602	-0.275	TRUE	TRUE	FALSE	TRUE
O88531	Ppt1	8.9807	9.4672	9.55307	9.30274	9.49131	9.25083	9.25306	9.20553	10.0185	10.0409	9.92793	10.1796	9.54293	9.65627	9.54179	9.58765	FALSE	0	6.15e-06	8.07e-05	0.716	0.000507282	0.00402	-0.46	0.0254365	0.136	0.256	-0.262	-0.237	0.0197	0.479	TRUE	TRUE	FALSE	TRUE
O88444	Adcy1	8.79929	8.85673	8.57989	8.6562	8.47183	8.59447	8.662	8.63679	8.1709	8.12135	8.23203	8.21664	8.48174	8.37537	8.55186	8.45953	FALSE	0	4.77e-07	1.15e-05	-0.538	0.000436226	0.00358	0.282	0.000985916	0.0281	-0.256	0.0996	0.231	-0.0245	-0.306	TRUE	TRUE	FALSE	TRUE
O88428	Papss2	7.21433	7.26714	7.19697	7.36184	7.151	7.15472	7.23954	7.03047	7.50244	7.59528	7.53544	7.47177	7.23716	7.25582	7.21661	7.22587	FALSE	0	5.75e-05	0.000471	0.266	2.18e-05	0.000366	-0.292	0.586501	0.786	-0.0262	-0.147	-0.031	-0.0572	0.235	TRUE	TRUE	FALSE	TRUE
O88343	Slc4a4	12.1559	12.2543	12.371	12.2971	12.4247	12.3933	12.3227	12.3127	12.5811	12.5943	12.548	12.5649	12.2868	12.2585	12.2046	12.3244	FALSE	0	8.8e-06	0.000107	0.302	8.48e-06	0.000178	-0.304	0.982225	0.993	-0.00102	-0.00505	-0.0988	-0.0998	0.204	TRUE	TRUE	FALSE	TRUE
O70475	Ugdh	7.3698	7.10946	7.19784	7.20605	7.4241	7.09762	7.5734	6.91752	7.86488	7.88653	7.85403	7.79743	7.11804	7.44007	7.13996	7.5201	FALSE	0	0.000191657	0.00125	0.63	0.000679205	0.00505	-0.546	0.517422	0.735	0.0838	-0.154	-0.187	-0.103	0.443	TRUE	TRUE	FALSE	TRUE
O70458	Osmr	5.93681	5.88421	5.9871	5.53009	6.1071	6.04743	6.08981	6.16251	7.14413	7.06374	6.9185	7.14808	6.14433	6.02407	6.07733	6.40464	TRUE	6	4.41e-09	3.37e-07	1.23	2.22e-07	1.16e-05	-0.906	0.00467828	0.0553	0.328	-0.19	-0.457	-0.129	0.777	TRUE	TRUE	FALSE	TRUE
O70433	Fhl2	8.44839	8.44972	8.45405	8.5984	8.48549	8.41183	8.51897	8.31319	8.17581	8.17462	8.20452	8.20189	8.51901	8.44186	8.64428	8.44216	FALSE	0	8.02e-05	0.000613	-0.298	3.66e-05	0.000533	0.323	0.664383	0.837	0.0242	0.0271	0.0824	0.107	-0.216	TRUE	TRUE	FALSE	TRUE
O70405	Ulk1	6.59474	6.60106	6.36253	6.38602	6.26639	6.28493	6.30219	6.4455	6.18871	6.04175	5.90542	6.02999	6.30504	6.27536	6.75342	6.50885	FALSE	0	0.000459482	0.00243	-0.445	0.000758524	0.00552	0.419	0.799277	0.911	-0.0254	-0.00349	0.158	0.132	-0.287	TRUE	TRUE	FALSE	TRUE
O70318	Epb41l2	11.9953	12.072	12.127	12.0776	12.0648	12.0339	12.0047	11.9935	12.5328	12.5586	12.5406	12.5375	12.1525	12.0871	12.1285	12.1635	FALSE	0	7.41e-10	8.69e-08	0.474	5.14e-09	6.57e-07	-0.409	0.0678977	0.242	0.0649	-0.168	-0.124	-0.059	0.351	TRUE	TRUE	FALSE	TRUE
O70309	Itgb5	7.06264	6.93057	6.93916	6.96694	7.21241	6.97343	6.87075	7.10006	7.17084	7.33612	7.27422	7.28897	6.9973	6.80274	6.62783	6.88345	FALSE	0	0.00245709	0.00914	0.293	7.27e-05	0.000906	-0.44	0.0859153	0.275	-0.147	0.0118	-0.0525	-0.2	0.24	TRUE	TRUE	FALSE	TRUE
O70200	Aif1	6.01148	6.28451	6.00291	5.92395	6.15092	5.93016	6.06658	6.02795	6.63338	6.85318	6.8969	6.89518	5.9729	6.04932	6.32899	5.88016	FALSE	0	1.85e-06	3.23e-05	0.764	1.91e-06	5.63e-05	-0.762	0.983057	0.993	0.00213	-0.2	-0.189	-0.186	0.575	TRUE	TRUE	FALSE	TRUE
O70161	Pip5k1c	11.681	11.7181	11.6936	11.7157	11.7633	11.7989	11.796	11.7997	11.3638	11.4059	11.3678	11.3508	11.6952	11.6385	11.7064	11.6637	FALSE	0	7.85e-09	5e-07	-0.33	2.27e-08	2.06e-06	0.304	0.354819	0.6	-0.0262	0.155	0.0672	0.041	-0.263	TRUE	TRUE	FALSE	TRUE
O70139	Pkig	8.66517	8.5044	8.74658	8.42354	8.87824	8.71162	8.79088	8.6848	8.27619	8.29387	8.19832	8.0908	8.48351	8.67458	8.69975	8.69937	FALSE	0	0.000226943	0.00142	-0.37	6.07e-05	0.000781	0.425	0.483052	0.712	0.0544	0.215	0.0336	0.088	-0.337	TRUE	TRUE	FALSE	TRUE
O55222	Ilk	11.8037	11.8395	11.9777	11.7428	11.918	11.9446	11.9814	11.9922	12.3815	12.4027	12.2702	12.2586	12.0661	12.0464	11.9303	12.0118	FALSE	0	1.76e-07	5.28e-06	0.487	2.66e-05	0.000419	-0.315	0.00474891	0.056	0.173	-0.0764	-0.195	-0.0218	0.293	TRUE	TRUE	FALSE	TRUE
O55137	Acot1	10.2051	10.1692	10.1131	10.0477	10.1871	10.0957	10.2068	10.1053	10.4573	10.4765	10.4635	10.3583	10.1628	10.0951	10.0816	10.2052	FALSE	0	8.63e-06	0.000106	0.305	9.42e-06	0.000193	-0.303	0.958052	0.986	0.00241	-0.0657	-0.0806	-0.0782	0.225	TRUE	TRUE	FALSE	TRUE
O55042	Snca	13.1932	13.4058	12.7236	12.8098	12.6344	13.0076	12.8208	13.2326	12.3343	12.3934	12.2899	12.2094	13.0525	12.4359	13.1768	12.6842	FALSE	0	0.00105793	0.00471	-0.726	0.0095334	0.0392	0.531	0.287343	0.536	-0.196	0.149	0.258	0.0621	-0.469	TRUE	TRUE	FALSE	TRUE
O55033	Nck2	9.77021	10.0021	9.82201	9.90191	9.9276	9.77328	9.79335	9.95182	9.51785	9.55433	9.53692	9.65061	9.88708	9.79957	9.90742	9.80912	FALSE	0	7.74e-05	0.000596	-0.309	0.000164702	0.00171	0.286	0.685984	0.849	-0.0233	0.0737	0.0862	0.063	-0.223	TRUE	TRUE	FALSE	TRUE
O54940	Bnip2	7.29421	7.22252	8.02368	7.60172	7.01219	7.01716	7.28442	6.92968	5.70537	6.13496	5.90727	6.94721	7.9517	7.5477	7.02776	6.74583	FALSE	0	0.000257629	0.00156	-1.36	0.00114062	0.00751	1.14	0.453105	0.687	-0.217	0.0388	0.513	0.296	-0.848	TRUE	TRUE	FALSE	TRUE
O54786	Dffa	6.02313	6.2896	6.30839	6.06268	6.19901	5.54521	6.4713	5.83497	5.27812	5.63228	5.35104	5.72477	6.05663	5.95052	5.97723	6.02732	FALSE	0	0.000845342	0.00394	-0.674	0.00679889	0.0302	0.506	0.311066	0.558	-0.168	0.0919	0.25	0.0822	-0.424	TRUE	TRUE	FALSE	TRUE
O54754	Aox1	6.72448	6.32247	6.40949	6.47889	6.40002	6.31063	6.77905	6.61757	7.02221	7.05556	7.09229	7.05915	6.58804	6.85019	6.53536	6.53174	FALSE	0	7.94e-05	0.000608	0.573	0.00103494	0.00697	-0.431	0.19509	0.436	0.143	-0.147	-0.19	-0.0472	0.384	TRUE	TRUE	FALSE	TRUE
O35874	Slc1a4	12.2977	12.2522	12.3744	12.4245	12.4154	12.4333	12.4004	12.3457	12.8049	12.8307	12.8149	12.8482	12.3468	12.421	12.3379	12.3257	FALSE	0	5.33e-09	3.84e-07	0.487	9.35e-09	1.06e-06	-0.467	0.606812	0.799	0.0206	-0.0809	-0.142	-0.122	0.345	TRUE	TRUE	FALSE	TRUE
O35709	Enc1	7.21426	7.20988	7.06195	7.07865	7.17193	7.18986	7.44639	7.23124	6.80286	6.69659	6.81529	6.80699	7.14974	7.06231	6.99657	7.19726	FALSE	0	6.18e-05	0.000499	-0.361	0.000190882	0.0019	0.321	0.546436	0.757	-0.0397	0.189	0.0704	0.0307	-0.29	TRUE	TRUE	FALSE	TRUE
O35639	Anxa3	9.79502	9.7548	9.9104	9.79333	9.81633	9.93056	9.93242	9.91338	10.5724	10.5335	10.4218	10.5761	9.95423	10.021	9.84546	9.96579	FALSE	0	7.75e-10	8.8e-08	0.713	1.17e-08	1.23e-06	-0.579	0.017427	0.113	0.133	-0.148	-0.233	-0.0994	0.48	TRUE	TRUE	FALSE	TRUE
O35598	Adam10	9.71293	10.0073	9.84205	10.0068	9.88265	9.81584	9.82314	9.76401	10.2984	10.4181	10.2905	10.3346	9.92915	9.95295	9.9434	9.9715	FALSE	0	2.06e-06	3.48e-05	0.443	9.71e-06	0.000197	-0.386	0.339601	0.589	0.057	-0.178	-0.107	-0.0503	0.336	TRUE	TRUE	FALSE	TRUE
O35566	Cd151	7.36514	7.91278	7.24521	7.01271	7.37008	7.23188	7.266	7.50805	7.77619	7.83517	7.91844	7.79885	7.25671	7.24627	7.29738	7.33627	TRUE	5	0.00499712	0.0162	0.448	0.00114996	0.00754	-0.548	0.471768	0.703	-0.0998	-0.117	-0.0771	-0.177	0.371	TRUE	TRUE	FALSE	TRUE
O35526	Stx1a	9.79339	10.003	9.98755	9.91921	10.0149	9.86966	9.85836	9.97704	9.5675	9.43677	9.57551	9.51203	10.0044	9.88492	9.97569	10.0248	FALSE	0	3.23e-06	4.92e-05	-0.403	9.02e-07	3.18e-05	0.45	0.406122	0.647	0.0467	0.0922	0.088	0.135	-0.315	TRUE	TRUE	FALSE	TRUE
O35516	Notch2	6.86119	6.52692	6.54874	6.56245	6.62307	6.6423	7.08444	6.59938	6.97726	7.08599	6.86012	6.96816	6.65953	6.65633	6.63968	6.55922	FALSE	0	0.00367847	0.0126	0.348	0.00397293	0.0201	-0.344	0.969777	0.99	0.00386	-0.00363	-0.116	-0.112	0.232	TRUE	TRUE	FALSE	TRUE
O35449	Prrt1	10.075	10.3894	9.77833	10.2297	10.3139	10.1755	10.1814	10.1133	9.52668	9.49152	9.69198	9.6929	10.0306	9.93941	10.209	10.3451	FALSE	0	0.000482291	0.00252	-0.517	0.000388465	0.00328	0.53	0.911755	0.967	0.013	0.185	0.107	0.12	-0.411	TRUE	TRUE	FALSE	TRUE
O35409	Folh1	8.67833	8.77928	8.72743	8.81542	8.67651	8.69902	8.57939	8.57096	9.10098	9.00739	9.2308	9.20035	8.81721	8.96815	8.85844	8.78949	FALSE	0	6.97e-06	8.92e-05	0.385	0.000203908	0.00201	-0.277	0.0725064	0.25	0.108	-0.212	-0.0936	0.0146	0.291	TRUE	TRUE	FALSE	TRUE
O35405	Pld3	10.2922	10.2016	10.2518	10.1077	10.0624	10.261	10.113	10.4245	9.79955	9.7703	9.84435	9.83404	10.1133	10.21	10.1096	10.0255	FALSE	0	4.22e-05	0.000365	-0.401	0.000598539	0.00457	0.303	0.173333	0.407	-0.0987	0.126	0.125	0.0258	-0.277	TRUE	TRUE	FALSE	TRUE
O35127	Grcc10	11.0251	10.8887	10.8577	11.0105	10.8922	11.035	10.9045	10.7927	10.6587	10.5825	10.6884	10.6957	10.9126	10.9686	11.0054	10.9883	FALSE	0	7.9e-05	0.000605	-0.289	3.62e-05	0.000532	0.312	0.666943	0.839	0.0232	0.037	0.0763	0.0995	-0.213	TRUE	TRUE	FALSE	TRUE
O35114	Scarb2	9.21157	9.09103	9.29788	9.19565	9.06864	9.06853	8.94612	8.90224	9.72236	9.82888	9.68225	9.62189	9.20707	9.27573	9.11627	9.22721	FALSE	0	3.55e-07	9.1e-06	0.515	4.24e-07	1.86e-05	-0.507	0.897995	0.961	0.00754	-0.283	-0.0799	-0.0724	0.435	TRUE	TRUE	FALSE	TRUE
O09044	Snap23	6.90209	7.01472	7.04675	6.90301	6.95358	6.80858	6.82965	6.89205	7.68252	7.60055	7.64884	7.73281	7.11758	7.28191	7.14334	7.22129	FALSE	0	1.14e-09	1.18e-07	0.7	1.63e-07	9.09e-06	-0.475	0.00050144	0.0188	0.224	-0.303	-0.207	0.0173	0.492	TRUE	TRUE	FALSE	TRUE
O08919	Numbl	10.4437	10.6113	10.4138	10.5432	10.3259	10.2827	10.3427	10.449	10.1219	10.1623	10.1519	10.1715	10.4841	10.3629	10.424	10.4479	FALSE	0	3.19e-06	4.9e-05	-0.351	4.04e-05	0.000577	0.278	0.144663	0.367	-0.0733	-0.00859	0.144	0.071	-0.207	TRUE	TRUE	FALSE	TRUE
O08914	Faah	10.8208	10.7951	10.7527	10.8684	10.7723	10.8577	10.8397	10.7466	10.3778	10.4075	10.419	10.3928	10.7026	10.692	10.7443	10.713	FALSE	0	7.97e-09	5.04e-07	-0.41	2.34e-07	1.2e-05	0.314	0.0132461	0.0972	-0.0963	0.123	0.128	0.0316	-0.282	TRUE	TRUE	FALSE	TRUE
O08739	Ampd3	8.17855	8.20473	8.02509	8.21223	8.24388	8.09924	8.22409	8.18166	8.67618	8.75487	8.66084	8.71578	8.18607	8.1894	8.26738	8.1739	FALSE	0	1.09e-08	6.13e-07	0.547	3.64e-08	2.91e-06	-0.498	0.309125	0.557	0.049	-0.125	-0.157	-0.108	0.39	TRUE	TRUE	FALSE	TRUE
O08734	Bak1	10.4624	10.174	10.2225	10.4997	10.3352	10.6218	10.6528	10.2376	10.7923	10.8256	10.6078	10.7541	10.4187	10.2454	10.2622	10.5382	FALSE	0	0.00168098	0.00679	0.405	0.00277579	0.0152	-0.379	0.804319	0.914	0.0265	-0.0163	-0.138	-0.112	0.267	TRUE	TRUE	FALSE	TRUE
O08709	Prdx6	14.0398	14.1401	13.9723	13.9414	13.9105	13.9206	13.8055	13.9313	14.9497	14.9604	14.9788	15.0195	14.0502	14.0779	14.1519	14.2533	FALSE	0	2.8e-11	1.03e-08	0.954	1.47e-10	5.33e-08	-0.844	0.051845	0.208	0.11	-0.364	-0.233	-0.123	0.721	TRUE	TRUE	FALSE	TRUE
O08691	Arg2	6.62444	7.83621	6.92641	6.7341	6.98992	6.98442	7.09467	7.15688	7.89611	7.80668	7.84652	7.83152	7.30233	7.24402	7.31395	7.3652	TRUE	10	0.000569256	0.00285	0.815	0.0110399	0.0439	-0.539	0.156239	0.385	0.276	-0.253	-0.279	-0.00321	0.536	TRUE	TRUE	FALSE	TRUE
O08601	Mttp	7.63582	7.3651	7.35053	7.70037	7.54212	7.47892	7.45339	7.47784	7.85593	7.90398	7.85343	7.98553	7.58238	7.4314	7.52677	7.42661	FALSE	0	9.48e-05	0.000704	0.387	5.59e-05	0.000735	-0.408	0.772878	0.895	-0.0212	-0.11	-0.0852	-0.106	0.302	TRUE	TRUE	FALSE	TRUE
O08573	Lgals9	6.59587	6.49318	6.64724	6.52328	6.60161	6.44812	6.61491	6.38991	7.26943	7.18108	7.1057	6.94798	6.52843	6.4929	6.89479	6.55362	FALSE	0	2.01e-05	0.000202	0.561	5.55e-05	0.000734	-0.509	0.567008	0.772	0.0525	-0.192	-0.141	-0.0881	0.421	TRUE	TRUE	FALSE	TRUE
O08532	Cacna2d1	11.4922	11.5249	11.5183	11.482	11.525	11.4302	11.4744	11.4727	11.0348	10.884	11.1637	11.1294	11.4755	11.4293	11.4777	11.4712	FALSE	0	2.65e-07	7.29e-06	-0.451	8.31e-07	2.97e-05	0.41	0.422169	0.658	-0.0409	0.101	0.13	0.0894	-0.321	TRUE	TRUE	FALSE	TRUE
O08529	Capn2	10.2747	10.3897	10.2997	10.3036	10.3432	10.2016	10.2529	10.2592	10.7565	10.8344	10.7135	10.7209	10.353	10.3466	10.3786	10.4257	FALSE	0	2.78e-08	1.25e-06	0.439	1.7e-07	9.42e-06	-0.38	0.163488	0.395	0.0591	-0.164	-0.111	-0.0524	0.328	TRUE	TRUE	FALSE	TRUE
G5E897	Poglut3	6.39609	6.27239	6.17918	6.59483	6.44456	6.42372	6.53187	6.12527	6.93305	6.88123	6.67495	6.8744	6.42523	6.50637	6.59053	6.39846	FALSE	0	0.000210999	0.00134	0.48	0.0022884	0.013	-0.361	0.23886	0.487	0.12	-0.134	-0.155	-0.0356	0.325	TRUE	TRUE	FALSE	TRUE
G5E829	Atp2b1	14.0101	14.0967	13.9951	14.0698	14.0444	14.1165	14.1014	14.0681	13.7629	13.7549	13.7519	13.8466	14.0176	13.9514	14.0801	14.1291	FALSE	0	1.73e-05	0.00018	-0.264	1.62e-05	0.000289	0.265	0.969001	0.99	0.00164	0.0953	0.0556	0.0573	-0.208	TRUE	TRUE	FALSE	TRUE
F8VPU2	Farp1	10.8221	10.8871	10.9602	10.7957	10.8777	10.7046	10.7635	10.915	11.2745	11.4099	11.1969	11.2829	10.807	10.7858	10.7969	10.8847	FALSE	0	2.46e-06	4e-05	0.425	7.09e-07	2.64e-05	-0.472	0.409949	0.649	-0.0477	-0.133	-0.0815	-0.129	0.343	TRUE	TRUE	FALSE	TRUE
F7BWT7	Tspan15	6.39986	6.36109	6.75447	6.6706	6.64044	6.65326	6.57021	6.9336	7.42657	7.52507	7.11434	7.22885	6.55765	6.85357	6.63148	6.53345	FALSE	0	8.83e-06	0.000107	0.777	3.68e-05	0.000536	-0.68	0.410775	0.649	0.0975	-0.104	-0.257	-0.159	0.52	TRUE	TRUE	FALSE	TRUE
F6XLV1	Crocc2	6.31437	6.0251	6.05888	5.96375	6.04924	6.07942	6.16304	6.14673	5.63948	5.73186	5.76655	5.63446	5.93487	6.08907	5.87062	6.09172	TRUE	6	7.05e-05	0.000552	-0.397	0.000824357	0.00587	0.303	0.211269	0.457	-0.094	0.137	0.118	0.0241	-0.279	TRUE	TRUE	FALSE	TRUE
E9Q6B2	Ccdc85c	8.2977	8.11846	8.05465	8.354	8.10685	8.52889	7.95805	8.25683	7.57421	7.72435	7.99701	7.17572	8.02417	7.96694	8.21107	8.32559	FALSE	0	0.00204381	0.00791	-0.588	0.0052768	0.0251	0.514	0.641568	0.822	-0.0743	0.171	0.164	0.0898	-0.424	TRUE	TRUE	FALSE	TRUE
E9Q634	Myo1e	8.18726	7.81306	7.83843	7.97117	7.77844	7.88101	7.79108	7.87952	8.28999	8.35195	8.43012	8.31752	7.78061	7.88215	7.94593	7.84453	FALSE	0	5.62e-05	0.000464	0.395	6.48e-06	0.000147	-0.484	0.221338	0.471	-0.0892	-0.166	-0.0464	-0.136	0.348	TRUE	TRUE	FALSE	TRUE
E9Q5C9	Nolc1	8.88991	8.88654	8.86834	8.74536	8.12173	8.52493	8.76779	8.47986	8.34033	8.16853	8.16073	7.45041	8.44352	8.71586	8.67991	8.69285	FALSE	0	0.000193459	0.00125	-0.818	0.00244176	0.0137	0.603	0.211485	0.457	-0.215	-0.0225	0.352	0.137	-0.466	TRUE	TRUE	FALSE	TRUE
E9PVD3	Dchs1	6.661	6.69384	6.72099	6.80521	7.38534	6.93462	6.89594	6.68497	6.96769	7.0772	7.19095	7.08564	6.67572	6.71701	6.4974	6.36908	FALSE	0	0.00830495	0.0245	0.36	0.000604335	0.0046	-0.516	0.206664	0.452	-0.155	0.14	-0.115	-0.27	0.245	TRUE	TRUE	FALSE	TRUE
D3Z6Q9	Bin2	5.53578	5.64721	5.48015	5.15714	5.53749	5.65573	5.6262	5.89243	6.16353	6.21117	5.96969	5.8689	5.72358	5.40646	5.74761	5.67919	FALSE	0	0.000122724	0.000865	0.598	0.00273166	0.015	-0.414	0.129279	0.344	0.184	-0.0284	-0.251	-0.0672	0.347	TRUE	TRUE	FALSE	TRUE
D3YZU1	Shank1	10.9928	11.0101	11.0234	11.0861	10.9776	11.1357	11.0617	11.0617	10.6835	10.6869	10.6677	10.6839	10.964	10.9206	11.001	10.9934	FALSE	0	1.28e-07	4.26e-06	-0.348	1.18e-06	3.87e-05	0.289	0.126194	0.339	-0.0583	0.125	0.0937	0.0354	-0.254	TRUE	TRUE	FALSE	TRUE
D3YZI9	Pgbd5	8.54243	8.51731	8.52379	8.33578	8.51705	8.36884	8.3935	8.44543	7.93791	8.04517	7.9711	7.93518	8.33075	8.42094	8.41542	8.50032	FALSE	0	1.31e-07	4.31e-06	-0.507	6.58e-07	2.52e-05	0.445	0.25007	0.498	-0.063	0.106	0.155	0.0918	-0.353	TRUE	TRUE	FALSE	TRUE
C0HKG5	Rnaset2a	8.40252	8.15956	8.60147	8.13646	8.27071	8.34784	8.25508	8.57355	8.69328	8.62647	8.64188	8.65514	8.33929	8.45048	8.20156	8.04867	FALSE	0	0.00770562	0.023	0.329	0.0022686	0.0129	-0.394	0.549724	0.759	-0.065	-0.0385	-0.0752	-0.14	0.254	TRUE	TRUE	FALSE	TRUE
B2RXS4	Plxnb2	8.85676	8.74329	8.80349	8.70586	8.63446	8.70975	8.72098	8.75786	9.1556	9.22729	9.12672	9.17356	8.76807	8.78079	8.80145	8.85639	FALSE	0	1.17e-07	3.95e-06	0.393	2.57e-07	1.29e-05	-0.369	0.55598	0.764	0.0243	-0.158	-0.0865	-0.0622	0.307	TRUE	TRUE	FALSE	TRUE
B2RXR6	Ankrd44	7.06032	7.18279	7.15843	7.19747	7.05174	6.85856	7.06608	7.07005	7.55161	7.7836	7.5046	7.62076	6.97759	6.96724	6.61699	7.27124	TRUE	8	0.00060022	0.00298	0.465	2.22e-05	0.000371	-0.657	0.0920082	0.285	-0.191	-0.172	-0.0339	-0.225	0.431	TRUE	TRUE	FALSE	TRUE
A6PWD2	Fhad1	11.8625	11.2982	11.3298	11.3734	10.9198	11.5705	11.089	11.4587	13.1145	13.3331	12.8234	13.3877	11.7624	11.8091	12.3818	12.0996	FALSE	0	2.26e-07	6.43e-06	1.7	1.97e-05	0.00034	-1.15	0.0098574	0.0834	0.547	-0.716	-0.51	0.0374	1.19	TRUE	TRUE	FALSE	TRUE
A6H6A9	Rabgap1l	8.48356	8.61278	8.50598	8.61127	8.41239	8.47572	8.36784	8.32944	8.30024	8.2563	8.29126	8.29672	8.56772	8.5593	8.68335	8.76481	FALSE	0	0.000102156	0.000747	-0.267	4.77e-06	0.000116	0.358	0.0925358	0.285	0.0904	-0.0736	0.0835	0.174	-0.184	TRUE	TRUE	FALSE	TRUE
A4Q9F0	Ttll7	6.04256	5.91682	5.91486	6.11713	5.62103	6.0207	6.03666	6.17843	5.79214	5.3937	5.63671	5.66524	6.01894	6.05757	6.07775	5.95041	TRUE	3	0.0028946	0.0105	-0.376	0.00168993	0.0103	0.404	0.790452	0.906	0.0283	0.0617	0.0953	0.124	-0.281	TRUE	TRUE	FALSE	TRUE
A2AQ19	Rtf1	6.42675	6.31515	6.41745	6.63696	6.0205	6.32904	6.50323	6.10842	5.8923	5.99709	5.67107	6.01053	6.39556	6.00939	6.20053	6.45779	FALSE	0	0.000388082	0.00213	-0.556	0.00779162	0.0335	0.373	0.150124	0.376	-0.183	0.0283	0.237	0.0538	-0.319	TRUE	TRUE	FALSE	TRUE
A2APT9	Klhdc7a	7.45493	7.14843	7.26772	7.20876	7.1136	7.30957	7.46781	7.34635	7.56873	7.62652	7.53151	7.67616	7.30491	7.32267	7.2495	7.33219	FALSE	0	0.000433222	0.00232	0.331	0.00102994	0.00695	-0.298	0.662154	0.837	0.0324	-0.0613	-0.101	-0.0683	0.23	TRUE	TRUE	FALSE	TRUE
A2AKQ0	Slc35d1	7.07106	7.12087	7.32592	6.89006	7.11212	7.13851	7.30681	7.57622	7.7984	7.87504	7.57589	7.56287	7.26996	7.12179	6.77882	7.11341	FALSE	0	0.000300102	0.00174	0.601	0.000189266	0.00189	-0.632	0.809889	0.916	-0.031	-0.00644	-0.188	-0.219	0.413	TRUE	TRUE	FALSE	TRUE
A2A8L5	Ptprf	9.98684	9.9693	10.0671	9.99617	10.0814	10.0203	10.0398	10.0002	10.34	10.4344	10.3354	10.3623	9.99687	9.99028	9.98549	10.0142	FALSE	0	2.49e-08	1.14e-06	0.363	1.87e-08	1.82e-06	-0.371	0.808428	0.916	-0.00813	-0.0658	-0.0964	-0.105	0.267	TRUE	TRUE	FALSE	TRUE
A0JNU3	Aspg	4.74558	4.63549	4.8965	4.94145	4.60292	4.74257	5.71583	4.09622	6.20653	6.30538	6.0732	6.22887	5.02805	4.48436	4.81654	4.65212	TRUE	6	4.39e-05	0.000376	1.4	2.85e-05	0.000442	-1.46	0.808493	0.916	-0.0595	-0.346	-0.331	-0.39	1.07	TRUE	TRUE	FALSE	TRUE
Q9Z2W9	Gria3	9.99018	10.1394	10.0499	10.0782	10.1337	10.0159	10.0108	10.0537	9.77623	9.72143	9.72854	9.77988	9.87601	9.84211	10.0068	9.85395	FALSE	0	5.73e-06	7.66e-05	-0.313	0.00618585	0.0283	0.143	0.0018865	0.0373	-0.17	0.112	0.123	-0.0463	-0.19	TRUE	FALSE	FALSE	TRUE
Q9Z2W8	Gria4	12.1987	12.3324	12.3493	12.256	12.3358	12.2625	12.245	12.3058	12.0211	11.9758	12.0585	12.021	12.2055	12.1591	12.181	12.1946	FALSE	0	4.9e-06	6.86e-05	-0.265	0.000527975	0.00415	0.166	0.0184815	0.117	-0.099	0.0934	0.0902	-0.00883	-0.175	TRUE	FALSE	FALSE	TRUE
Q9Z2N8	Actl6a	9.42545	9.40603	9.54021	9.49351	9.4374	9.47198	9.56717	9.42962	9.79058	9.83431	9.71556	9.82446	9.66915	9.50856	9.43431	9.63937	FALSE	0	3.26e-05	0.000298	0.325	0.000871943	0.00616	-0.228	0.0972427	0.294	0.0966	-0.0977	-0.108	-0.0114	0.217	TRUE	FALSE	FALSE	TRUE
Q9Z2L7	Crlf3	7.30887	6.99167	6.98971	6.96106	7.13808	7.3311	7.22107	7.25897	7.24075	7.33888	7.36272	7.40778	6.97718	7.21924	7.16349	7.29815	FALSE	0	0.00440781	0.0146	0.275	0.0511323	0.137	-0.173	0.230761	0.479	0.102	0.0368	-0.138	-0.036	0.137	TRUE	FALSE	FALSE	TRUE
Q9Z2I0	Letm1	11.7299	11.6511	11.5905	11.697	11.5925	11.7318	11.6222	11.6905	11.4331	11.4002	11.3265	11.3559	11.4295	11.4297	11.5741	11.5737	FALSE	0	3.14e-05	0.000289	-0.288	0.0227023	0.0755	0.123	0.00392236	0.0502	-0.165	0.107	0.115	-0.05	-0.173	TRUE	FALSE	FALSE	TRUE
Q9Z2H5	Epb41l1	12.264	12.4315	12.3596	12.4169	12.3902	12.3323	12.2765	12.4098	12.0738	12.1298	12.0375	12.146	12.2397	12.2128	12.283	12.22	FALSE	0	2.09e-05	0.000209	-0.271	0.00556439	0.0261	0.142	0.0100719	0.0841	-0.129	0.0882	0.104	-0.0251	-0.167	TRUE	FALSE	FALSE	TRUE
Q9Z2E1	Mbd2	8.26843	7.90506	8.04839	7.92889	7.89747	7.66152	7.93516	7.79588	7.74175	7.75236	7.82153	7.57507	7.75706	8.11388	7.64128	7.84335	FALSE	0	0.00816388	0.0242	-0.315	0.275559	0.453	0.116	0.0725628	0.25	-0.199	-0.0329	0.182	-0.0166	-0.133	TRUE	FALSE	FALSE	TRUE
Q9Z218	Dpp6	12.2976	12.3238	12.3135	12.2321	12.3611	12.2952	12.2651	12.3664	12.007	12.0043	12.0406	12.0505	12.2552	12.1873	12.284	12.2761	FALSE	0	2.36e-06	3.89e-05	-0.266	1.53e-05	0.000277	0.225	0.259984	0.509	-0.0411	0.0994	0.0693	0.0281	-0.197	TRUE	FALSE	FALSE	TRUE
Q9Z204	Hnrnpc	11.1796	11.3368	11.0148	10.9685	11.1073	10.858	10.9751	11.0961	10.7513	10.7516	10.6168	10.9164	10.8061	10.8473	11.0572	10.8627	FALSE	0	0.00102549	0.00461	-0.366	0.152749	0.3	0.134	0.0205752	0.123	-0.232	0.0625	0.178	-0.0533	-0.188	TRUE	FALSE	FALSE	TRUE
Q9Z1Y4	Trip6	6.79367	6.51127	6.21098	6.43199	6.23077	7.02946	6.98774	6.98711	6.96622	7.21117	6.76747	7.23286	6.64547	6.63936	6.56627	6.66758	FALSE	0	0.004806	0.0157	0.557	0.0260772	0.0836	-0.415	0.40684	0.647	0.143	0.0663	-0.255	-0.113	0.302	TRUE	FALSE	FALSE	TRUE
Q9Z1P6	Ndufa7	9.81937	9.73449	9.316	9.42923	9.26475	9.65373	9.2019	9.5812	9.10321	8.67608	8.91997	9.17688	9.23143	9.43335	9.6353	9.17249	FALSE	0	0.00110224	0.00487	-0.606	0.0175141	0.0619	0.399	0.185364	0.423	-0.207	0.0911	0.24	0.0338	-0.365	TRUE	FALSE	FALSE	TRUE
Q9Z1E4	Gys1	9.04585	9.08126	9.21919	9.07433	9.16264	9.07572	9.09358	9.18894	9.42086	9.49743	9.44517	9.4844	9.2403	9.32901	9.12598	9.16073	FALSE	0	4.48e-06	6.43e-05	0.357	0.000193305	0.00192	-0.248	0.0457927	0.193	0.109	-0.0976	-0.123	-0.0138	0.234	TRUE	FALSE	FALSE	TRUE
Q9Z1E3	Nfkbia	4.59663	4.4506	5.23806	5.01648	4.79364	5.10543	4.54357	4.22493	5.78872	5.5839	5.1832	5.46803	4.77195	4.95786	5.03482	5.22414	FALSE	0	0.00423904	0.0142	0.681	0.0232585	0.0768	-0.509	0.404775	0.646	0.172	-0.332	-0.173	-0.00168	0.507	TRUE	FALSE	FALSE	TRUE
Q9Z0M5	Lipa	7.59021	7.61183	7.68289	7.82505	7.84569	7.691	7.67662	7.61389	8.09576	8.02679	7.95426	7.78472	7.67876	8.2364	8.04822	8.10849	FALSE	0	0.0146371	0.0386	0.288	0.619385	0.76	0.0526	0.00533001	0.059	0.34	-0.135	-0.164	0.176	0.123	TRUE	FALSE	FALSE	TRUE
Q9Z0H4	Celf2	10.2267	10.3116	10.2326	10.3448	10.2078	10.2252	10.1927	10.2128	9.97423	10.1	9.9144	10.0239	10.1123	10.1942	10.199	10.0966	FALSE	0	1.62e-05	0.000172	-0.276	0.00416237	0.0208	0.147	0.00998325	0.0837	-0.128	0.0491	0.118	-0.01	-0.157	TRUE	FALSE	FALSE	TRUE
Q9WV34	Mpp2	11.64	11.5834	11.7709	11.6464	11.6466	11.6455	11.6018	11.7271	11.3993	11.3809	11.3809	11.419	11.6227	11.6431	11.5955	11.5454	FALSE	0	1.5e-05	0.000162	-0.265	0.000184697	0.00186	0.207	0.177556	0.412	-0.0585	0.0772	0.0821	0.0236	-0.183	TRUE	FALSE	FALSE	TRUE
Q9WV18	Gabbr1	10.4336	10.4605	10.4582	10.4702	10.3979	10.4105	10.3897	10.4505	10.0685	10.0673	10.1492	10.162	10.3286	10.2473	10.3151	10.2913	FALSE	0	3.7e-08	1.55e-06	-0.344	5.15e-05	0.000695	0.184	0.000197261	0.0122	-0.16	0.0934	0.137	-0.0232	-0.207	TRUE	FALSE	FALSE	TRUE
Q9WUU8	Tnip1	6.43876	6.24772	5.68649	6.15341	6.09774	6.42178	6.29001	6.27642	5.3061	5.63272	5.79458	5.74849	5.90509	5.62965	5.85404	5.94555	FALSE	0	0.0030443	0.0109	-0.511	0.158738	0.309	0.213	0.0561214	0.219	-0.298	0.307	0.167	-0.131	-0.344	TRUE	FALSE	FALSE	TRUE
Q9WUM4	Coro1c	11.7761	11.8552	11.7575	12.0077	11.6547	11.8493	11.6906	11.7764	11.5077	11.5981	11.5403	11.6164	11.6725	11.531	11.9095	11.5984	FALSE	0	0.00233743	0.00878	-0.283	0.164691	0.317	0.112	0.0419956	0.183	-0.171	0.0339	0.14	-0.031	-0.143	TRUE	FALSE	FALSE	TRUE
Q9WUB3	Pygm	13.0258	12.9965	13.1327	13.0275	13.1073	12.9983	13.0721	13.0756	13.361	13.3674	13.309	13.3896	13.1362	13.2419	13.1314	13.119	FALSE	0	1.75e-06	3.08e-05	0.311	0.00018941	0.00189	-0.2	0.0142933	0.101	0.111	-0.0924	-0.11	0.00142	0.201	TRUE	FALSE	FALSE	TRUE
Q9WTZ1	Rnf7	6.52545	6.75179	6.387	6.38463	7.35098	6.76668	7.56871	7.05255	7.00417	7.25352	6.83962	6.84101	6.7203	6.62903	6.4669	6.96194	FALSE	0	0.0100297	0.0285	0.472	0.0893118	0.207	-0.29	0.270503	0.518	0.182	0.341	-0.332	-0.149	0.141	TRUE	FALSE	FALSE	TRUE
Q9WTU6	Mapk9	8.20317	8.11041	8.03749	7.96756	8.15527	7.96327	8.1559	8.03691	7.78381	7.82915	7.78531	7.78952	7.90234	7.90928	7.90269	7.82923	FALSE	0	9.31e-05	0.000694	-0.283	0.112141	0.242	0.0889	0.00238435	0.0412	-0.194	0.118	0.12	-0.0742	-0.163	TRUE	FALSE	FALSE	TRUE
Q9WTU3	Scn8a	9.06999	9.10869	9.06629	9.17623	8.98693	9.07779	9.09841	9.05557	8.85755	8.78418	8.73894	8.83341	9.04261	9.0828	9.0172	8.90625	FALSE	0	7.74e-06	9.68e-05	-0.302	0.000316509	0.00281	0.209	0.0533345	0.212	-0.0931	0.0607	0.111	0.0183	-0.19	TRUE	FALSE	FALSE	TRUE
Q9WTN0	Ggps1	8.59796	9.00081	8.81292	8.80149	8.69682	8.61108	8.62375	8.68753	8.59928	8.60887	8.52696	8.38026	8.59862	8.56859	8.52454	8.61549	FALSE	0	0.00157554	0.00646	-0.274	0.506458	0.674	0.048	0.0061258	0.0649	-0.226	0.0139	0.162	-0.0641	-0.112	TRUE	FALSE	FALSE	TRUE
Q9R1S8	Capn7	7.49337	7.58666	7.57495	7.57514	7.29245	7.54903	7.53396	7.32659	7.3922	7.24602	7.18417	7.24134	7.53867	7.32854	7.42342	7.23819	FALSE	0	0.00122937	0.00532	-0.292	0.130535	0.269	0.116	0.0295293	0.149	-0.175	0.0177	0.15	-0.0256	-0.142	TRUE	FALSE	FALSE	TRUE
Q9R1E6	Enpp2	9.00089	8.68667	8.29169	8.45413	8.1474	8.12062	8.94664	8.81664	9.36056	9.41571	9.35801	9.16473	8.74388	9.06593	8.91865	8.81155	FALSE	0	0.00163246	0.00664	0.716	0.0317409	0.0963	-0.44	0.155817	0.385	0.277	-0.324	-0.223	0.0535	0.493	TRUE	FALSE	FALSE	TRUE
Q9R1B9	Slit2	6.99747	7.10155	7.11598	7.01324	7.07072	6.73484	6.89199	7.01459	6.79528	6.75616	6.82587	6.55718	6.93604	6.9912	6.88947	6.90991	FALSE	0	0.000431531	0.00232	-0.323	0.0142296	0.0533	0.198	0.0983469	0.296	-0.125	0.0154	0.144	0.0191	-0.179	TRUE	FALSE	FALSE	TRUE
Q9R194	Cry2	9.34925	9.15537	9.19789	9.08326	9.26524	9.17109	9.391	9.07637	8.88165	8.80833	8.74835	8.95771	8.8086	9.16937	9.08639	9.06067	FALSE	0	0.00108521	0.0048	-0.347	0.0497961	0.135	0.182	0.0720477	0.25	-0.165	0.15	0.121	-0.0444	-0.227	TRUE	FALSE	FALSE	TRUE
Q9R0Z9	Dlc1	6.27988	6.26266	5.84986	6.1343	5.88234	6.11956	6.01163	6.13113	5.95603	5.85284	5.18493	5.36586	5.6889	5.53461	5.85236	5.75381	FALSE	0	0.00293001	0.0106	-0.542	0.449285	0.625	0.118	0.0138132	0.0997	-0.424	0.17	0.265	-0.159	-0.276	TRUE	FALSE	FALSE	TRUE
Q9R0N7	Syt7	10.8805	10.81	10.7379	10.8887	10.8745	10.6537	10.7575	10.769	10.527	10.4196	10.5218	10.4305	10.7192	10.6608	10.9314	10.5704	FALSE	0	0.000146353	0.00101	-0.355	0.00309209	0.0165	0.246	0.136782	0.356	-0.109	0.0666	0.132	0.0234	-0.222	TRUE	FALSE	FALSE	TRUE
Q9R0M4	Podxl	7.29828	7.36322	7.41343	7.46616	7.5355	7.39959	7.57058	7.37156	7.73649	7.89	7.59261	7.65672	7.61047	7.59837	7.53244	7.62589	FALSE	0	0.000116646	0.00083	0.334	0.0644811	0.163	-0.127	0.00567795	0.0618	0.207	-0.072	-0.156	0.0505	0.178	TRUE	FALSE	FALSE	TRUE
Q9R0K7	Atp2b2	13.8495	13.8224	13.8066	13.9089	13.8187	13.8716	13.8709	13.8023	13.5014	13.4972	13.534	13.5647	13.7403	13.6752	13.7505	13.7537	FALSE	0	1.38e-07	4.46e-06	-0.323	2.47e-05	0.000395	0.206	0.00354736	0.0486	-0.117	0.105	0.111	-0.00559	-0.211	TRUE	FALSE	FALSE	TRUE
Q9QZX7	Srr	13.1332	13.033	12.9518	13.1234	12.9571	13.0983	13.1029	13.0287	12.7533	12.7117	12.8624	12.784	13.0032	13.0438	13.0037	13.0797	FALSE	0	4.4e-05	0.000377	-0.282	0.000122603	0.00137	0.255	0.577643	0.779	-0.0277	0.0674	0.081	0.0532	-0.202	TRUE	FALSE	FALSE	TRUE
Q9QZN1	Fbxl17	7.48149	7.3445	6.89334	7.37118	6.86337	6.81659	6.814	6.9432	6.82658	6.61255	6.94953	6.70681	6.77659	6.63001	7.19369	6.97132	FALSE	0	0.00170126	0.00685	-0.499	0.372213	0.552	0.119	0.0106738	0.0869	-0.38	-0.0904	0.323	-0.0568	-0.176	TRUE	FALSE	FALSE	TRUE
Q9QZI8	Serinc1	7.87394	9.75585	8.1047	9.325	8.32941	9.01863	8.04067	8.51204	7.77073	7.6938	7.35413	7.51822	7.71091	7.53722	8.09694	7.51022	FALSE	0	0.00410803	0.0139	-1.18	0.71303	0.829	0.13	0.00868909	0.0787	-1.05	0.341	0.63	-0.421	-0.55	TRUE	FALSE	FALSE	TRUE
Q9QZ23	Nfu1	10.6754	10.5348	10.5949	10.6117	10.576	10.7474	10.6449	10.7298	10.263	10.3444	10.1314	10.3128	10.4202	10.3536	10.4949	10.3889	FALSE	0	1.65e-05	0.000174	-0.341	0.0132748	0.0506	0.151	0.00318315	0.0469	-0.19	0.186	0.115	-0.0746	-0.226	TRUE	FALSE	FALSE	TRUE
Q9QYR9	Acot2	9.6207	9.64164	9.60929	9.47094	9.67267	9.44858	9.6781	9.71953	9.89142	9.88634	9.80858	9.83357	9.67754	9.75084	9.73339	9.74064	FALSE	0	0.000236274	0.00146	0.269	0.0341474	0.102	-0.129	0.0235941	0.133	0.14	-0.0693	-0.113	0.0266	0.156	TRUE	FALSE	FALSE	TRUE
Q9QYP6	Azi2	7.55481	7.50532	7.6968	7.7215	7.66897	7.78777	7.59084	7.35618	7.37536	7.1804	7.26183	7.1753	7.25832	7.34503	7.32939	7.48431	FALSE	0	0.000587704	0.00293	-0.371	0.228986	0.401	0.106	0.00707255	0.0693	-0.265	0.145	0.164	-0.101	-0.208	TRUE	FALSE	FALSE	TRUE
Q9QYF9	Ndrg3	10.4532	10.6148	10.5888	10.5985	10.6581	10.5493	10.5974	10.5883	10.2824	10.2252	10.3652	10.3275	10.5585	10.3989	10.4496	10.5292	FALSE	0	7.22e-05	0.000563	-0.264	0.00172601	0.0105	0.184	0.116548	0.325	-0.0798	0.112	0.0773	-0.00251	-0.186	TRUE	FALSE	FALSE	TRUE
Q9QYB1	Clic4	9.83553	9.96648	10.0221	9.97554	10.0351	10.0256	9.99497	10.0514	10.2446	10.3375	10.2781	10.1612	10.0695	10.0405	9.93084	10.2046	FALSE	0	8.84e-05	0.000666	0.305	0.00394792	0.02	-0.194	0.0680926	0.243	0.111	-0.0466	-0.123	-0.012	0.182	TRUE	FALSE	FALSE	TRUE
Q9QXW2	Fbxw5	6.22664	6.17501	6.45755	5.72742	6.42061	6.40899	6.48981	6.73809	5.78184	5.63384	5.62553	6.02525	6.05871	6.07042	6.20673	6.21629	FALSE	0	0.0119651	0.0328	-0.38	0.0136178	0.0515	0.371	0.948793	0.983	-0.00862	0.373	0.00523	-0.00338	-0.375	TRUE	FALSE	FALSE	TRUE
Q9QXD8	Limd1	5.83535	5.74801	5.53779	5.50445	5.64629	5.68069	6.11754	5.85902	6.1513	6.07394	5.8264	6.05379	5.66615	5.8973	5.60777	6.07427	FALSE	0	0.00945268	0.0271	0.37	0.102883	0.228	-0.215	0.229104	0.478	0.155	-0.00412	-0.174	-0.0186	0.196	TRUE	FALSE	FALSE	TRUE
Q9QWR8	Naga	8.94347	8.65618	8.61643	8.7072	8.59403	8.61834	8.73112	8.92449	9.02346	9.06492	9.09064	8.83189	8.91591	8.96974	8.9302	8.85076	FALSE	0	0.00556863	0.0177	0.272	0.318509	0.497	-0.0861	0.0422834	0.184	0.186	-0.125	-0.111	0.0749	0.161	TRUE	FALSE	FALSE	TRUE
Q9QVP9	Ptk2b	12.3452	12.3815	12.2212	12.3712	12.3217	12.3729	12.3974	12.3296	11.9851	12.009	11.9628	12.0117	12.205	12.2419	12.2639	12.2896	FALSE	0	3.49e-07	9.03e-06	-0.338	7.94e-06	0.00017	0.258	0.0536146	0.212	-0.0796	0.124	0.0979	0.0183	-0.24	TRUE	FALSE	FALSE	TRUE
Q9JM52	Mink1	10.2782	10.3652	10.2073	10.2862	10.2918	10.2783	10.2804	10.3164	9.93014	10.0367	10.0245	9.94524	10.138	10.0151	10.1322	10.2183	FALSE	0	1.09e-05	0.000126	-0.3	0.00731553	0.0319	0.142	0.00352314	0.0486	-0.158	0.12	0.113	-0.0456	-0.187	TRUE	FALSE	FALSE	TRUE
Q9JLY7	Dusp14	7.26209	7.35367	6.34051	6.83137	6.37221	6.57127	5.24328	5.61272	5.8869	5.24605	6.34152	6.01695	5.902	6.04852	7.14176	6.47023	TRUE	4	0.00780232	0.0233	-1.07	0.157392	0.307	0.518	0.130784	0.346	-0.556	-0.34	0.657	0.101	-0.417	TRUE	FALSE	FALSE	TRUE
Q9JL15	Lgals8	6.88507	6.81159	6.93701	6.80116	6.79055	7.09349	6.84565	7.05594	7.14351	7.13525	7.19191	7.26377	6.98215	7.01271	6.9745	6.91911	FALSE	0	0.000129761	0.000909	0.325	0.00437232	0.0216	-0.211	0.0905796	0.283	0.113	-0.0438	-0.132	-0.0181	0.193	TRUE	FALSE	FALSE	TRUE
Q9JKN6	Nova1	9.55308	9.50034	9.59593	9.54397	9.35068	9.50746	9.51827	9.6178	9.24558	9.21146	9.04044	9.12231	9.08958	9.26142	9.40046	9.42457	FALSE	0	9.91e-05	0.000731	-0.393	0.0791982	0.189	0.139	0.00378494	0.0499	-0.254	0.125	0.174	-0.0799	-0.219	TRUE	FALSE	FALSE	TRUE
Q9JKL5	Tesc	9.32669	9.33893	9.2173	9.32459	9.41314	9.41876	9.22485	9.26472	9.03921	9.06517	9.04094	8.91887	9.13336	9.23514	9.34787	9.27712	FALSE	0	0.000182508	0.0012	-0.286	0.00110566	0.00734	0.232	0.363209	0.609	-0.0535	0.106	0.0777	0.0242	-0.208	TRUE	FALSE	FALSE	TRUE
Q9JKK1	Stx6	8.34283	8.47851	8.19469	8.2374	8.15183	8.21019	8.14894	8.35296	8.05095	8.06769	8.0678	7.97338	8.11982	8.02518	8.17856	8.17813	FALSE	0	0.000659313	0.00322	-0.273	0.195711	0.359	0.0855	0.00972894	0.0834	-0.188	0.0423	0.14	-0.0483	-0.134	TRUE	FALSE	FALSE	TRUE
Q9JKC6	Cend1	9.50398	9.20838	9.28839	9.14092	9.33764	9.25769	9.18586	9.31731	8.70106	8.62564	8.82492	8.7371	8.9606	8.31002	9.25258	8.66694	FALSE	0	0.00182303	0.00725	-0.563	0.616599	0.758	0.0754	0.0050563	0.0579	-0.488	0.255	0.265	-0.222	-0.298	TRUE	FALSE	FALSE	TRUE
Q9JK45	Kcnq5	8.06115	7.95393	8.13265	7.7557	8.14146	7.86176	8.11233	8.08171	7.75407	7.59351	7.62643	7.62509	7.81538	7.87567	7.798	7.648	FALSE	0	0.00128593	0.00552	-0.326	0.120778	0.255	0.134	0.0336779	0.16	-0.192	0.185	0.111	-0.0805	-0.215	TRUE	FALSE	FALSE	TRUE
Q9JJT9	Phax	6.96479	6.84562	6.77942	6.71288	6.744	6.46243	6.64189	6.74879	6.64381	6.55899	6.45265	6.43183	6.60193	6.47642	6.71371	6.3891	FALSE	0	0.00245665	0.00914	-0.304	0.78056	0.874	0.0235	0.00432838	0.0533	-0.28	0.0138	0.19	-0.0902	-0.114	TRUE	FALSE	FALSE	TRUE
Q9JJF3	Riox1	6.38842	6.33213	6.30005	6.73869	6.06259	6.55623	6.05047	5.85242	6.0153	5.92222	6.16082	6.15173	6.28667	6.40399	6.3109	6.29815	FALSE	0	0.0100232	0.0285	-0.377	0.0576063	0.15	0.262	0.380692	0.627	-0.115	-0.109	0.2	0.0855	-0.177	TRUE	FALSE	FALSE	TRUE
Q9JJE7	Fads3	6.82876	6.41848	6.70958	6.79287	6.56568	6.8382	6.82702	6.70535	6.51697	6.45637	6.33714	6.28609	6.2941	6.62976	6.64367	6.81	FALSE	0	0.0199563	0.0492	-0.288	0.0972396	0.219	0.195	0.411417	0.65	-0.093	0.13	0.0837	-0.00937	-0.205	TRUE	FALSE	FALSE	TRUE
Q9JJC6	Rilpl1	7.50461	7.68803	7.5231	7.44462	7.73536	7.50229	7.67166	7.68774	7.44411	7.11947	7.15137	7.33236	7.28685	7.4371	7.53953	7.49855	FALSE	0	0.00399741	0.0135	-0.278	0.0446003	0.124	0.179	0.239411	0.487	-0.0996	0.176	0.0672	-0.0324	-0.211	TRUE	FALSE	FALSE	TRUE
Q9JJ43	Rbfox1	8.12843	8.57337	8.6435	8.53288	8.66554	8.5021	8.66735	8.63357	8.17038	8.10027	8.13579	8.21816	8.44428	8.34099	8.25385	8.36952	FALSE	0	0.00318283	0.0113	-0.313	0.043434	0.121	0.196	0.205119	0.45	-0.117	0.218	0.0708	-0.0466	-0.243	TRUE	FALSE	FALSE	TRUE
Q9JIT0	Lmbr1	6.69616	6.65752	6.62095	6.66238	6.64608	6.65535	6.72569	6.64206	6.36731	6.18215	6.4799	6.30647	6.63184	6.3939	6.01806	6.3806	FALSE	0	0.00438137	0.0145	-0.325	0.821009	0.898	0.0221	0.00694296	0.0689	-0.303	0.163	0.155	-0.148	-0.17	TRUE	FALSE	FALSE	TRUE
Q9JIS5	Sv2a	10.605	10.6395	10.704	10.6315	10.8118	10.6901	10.7264	10.8109	10.3967	10.422	10.3044	10.3939	10.4681	10.4591	10.5801	10.6046	FALSE	0	3.36e-05	0.000304	-0.266	0.00485187	0.0235	0.149	0.019874	0.121	-0.117	0.182	0.067	-0.05	-0.199	TRUE	FALSE	FALSE	TRUE
Q9JIQ3	Diablo	5.83771	6.21064	5.99026	5.6166	6.16893	6.16925	6.29317	6.44745	6.15599	6.3569	6.15346	6.23219	5.97785	5.90046	5.85106	6.11576	FALSE	0	0.0113362	0.0314	0.311	0.0271048	0.0859	-0.263	0.663452	0.837	0.0475	0.177	-0.179	-0.131	0.132	TRUE	FALSE	FALSE	TRUE
Q9JIP4	Panx1	6.93396	7.21318	7.06594	7.1203	7.38262	7.18767	7.11043	7.07225	6.80091	6.82209	6.63651	6.63674	6.92134	6.79689	6.98792	6.93378	FALSE	0	0.000316189	0.00182	-0.359	0.0281083	0.0883	0.186	0.0385549	0.173	-0.173	0.212	0.107	-0.0664	-0.252	TRUE	FALSE	FALSE	TRUE
Q9JI75	Nqo2	9.44516	9.45224	9.47282	9.46281	9.50094	9.43547	9.54714	9.38267	9.91659	9.89846	9.81178	9.74018	9.58362	9.61589	9.67389	9.60106	FALSE	0	5.05e-07	1.18e-05	0.383	0.000176799	0.0018	-0.223	0.0027518	0.0437	0.16	-0.13	-0.138	0.0223	0.245	TRUE	FALSE	FALSE	TRUE
Q9JI46	Nudt3	10.0126	10.0945	9.49181	9.95184	9.48411	9.73527	9.53901	9.78055	9.40126	9.42182	9.54675	9.43526	9.71525	9.64965	9.9458	9.59382	FALSE	0	0.0020998	0.0081	-0.436	0.0328459	0.0988	0.275	0.186	0.424	-0.162	-0.0402	0.213	0.0512	-0.224	TRUE	FALSE	FALSE	TRUE
Q9JHZ2	Ankh	8.32414	8.61218	8.37109	8.5638	8.49832	8.34418	8.52185	8.5558	8.1408	8.11486	7.8213	8.01468	8.09764	8.10537	8.45484	8.27279	FALSE	0	0.000311989	0.0018	-0.445	0.0423014	0.119	0.21	0.0252207	0.136	-0.235	0.179	0.167	-0.0682	-0.278	TRUE	FALSE	FALSE	TRUE
Q9JHH9	Copz2	6.49062	6.07048	6.24885	6.34473	6.10028	6.14016	6.74978	6.52697	6.95239	6.84919	6.89088	6.73131	6.55804	6.6148	6.31607	6.63579	FALSE	0	0.000726314	0.00347	0.567	0.027434	0.0867	-0.325	0.0874878	0.278	0.243	-0.134	-0.225	0.0174	0.342	TRUE	FALSE	FALSE	TRUE
Q9ET01	Pygl	10.0246	10.0703	10.3022	10.1264	10.251	10.2376	10.191	10.1815	10.4965	10.52	10.4697	10.4682	10.2607	10.4387	10.1899	10.2286	FALSE	0	3.18e-05	0.000292	0.358	0.00347508	0.0181	-0.209	0.0258662	0.138	0.149	-0.0633	-0.148	0.00093	0.21	TRUE	FALSE	FALSE	TRUE
Q9ES97	Rtn3	11.9496	12.0664	12.0364	12.1197	12.0455	12.0085	11.9685	12.0317	11.7391	11.7364	11.7391	11.7423	11.9455	11.9344	11.9736	12.025	FALSE	0	8.87e-07	1.79e-05	-0.304	2e-05	0.000344	0.23	0.0656526	0.238	-0.0734	0.0722	0.102	0.0283	-0.202	TRUE	FALSE	FALSE	TRUE
Q9ES74	Nek7	7.87838	7.93164	8.01665	7.89845	7.90351	7.95473	7.91447	8.14085	8.27042	8.24069	8.19111	8.24251	8.06695	8.09865	8.08683	8.02776	FALSE	0	2.28e-05	0.000226	0.305	0.00453119	0.0222	-0.166	0.0136827	0.099	0.139	-0.0756	-0.123	0.0161	0.182	TRUE	FALSE	FALSE	TRUE
Q9ERG0	Lima1	8.36749	8.29812	8.46735	8.23017	8.43718	8.29599	8.45569	8.30879	8.76353	8.66369	8.76556	8.63982	8.54743	8.60126	8.47523	8.52995	FALSE	0	1.14e-05	0.00013	0.367	0.00862001	0.0364	-0.17	0.00315865	0.0469	0.198	-0.116	-0.15	0.048	0.218	TRUE	FALSE	FALSE	TRUE
Q9EQZ7	Rims2	9.74043	9.58821	9.59495	9.72955	9.52067	9.61262	9.54274	9.34441	9.34051	9.26251	9.25161	9.35367	9.43873	9.42179	9.54731	9.42784	FALSE	0	1.91e-05	0.000195	-0.361	0.0161428	0.0585	0.157	0.00310934	0.0463	-0.204	0.0228	0.181	-0.0234	-0.18	TRUE	FALSE	FALSE	TRUE
Q9EQT3	Rhou	4.17455	3.83401	4.47613	4.29635	4.54088	4.58933	3.71622	4.52248	4.94609	4.37818	4.89334	5.09865	4.70917	5.00931	4.7142	4.66288	FALSE	0	0.00673768	0.0206	0.634	0.786519	0.878	-0.0552	0.0116713	0.0907	0.579	-0.193	-0.34	0.239	0.294	TRUE	FALSE	FALSE	TRUE
Q9EQP2	Ehd4	8.7447	8.66314	8.58191	8.62974	8.5714	8.51257	8.63518	8.65092	8.94607	8.93277	8.97416	8.92952	8.64956	8.74181	8.66053	8.76023	FALSE	0	8.11e-06	0.000101	0.291	5.5e-05	0.00073	-0.243	0.278358	0.527	0.0482	-0.131	-0.0691	-0.021	0.222	TRUE	FALSE	FALSE	TRUE
Q9EPN1	Nbea	11.3072	11.3172	11.2743	11.3037	11.2935	11.308	11.2939	11.265	11.019	10.9847	11.0136	11.0256	11.1964	11.1661	11.2223	11.2258	FALSE	0	2.91e-08	1.29e-06	-0.29	4.23e-06	0.000107	0.192	0.00242539	0.0414	-0.098	0.0891	0.0996	0.00163	-0.19	TRUE	FALSE	FALSE	TRUE
Q9EPJ9	Arfgap1	9.47414	9.57978	9.5317	9.58188	9.41806	9.37719	9.43005	9.36108	9.19116	9.22832	9.27984	9.28148	9.4046	9.45298	9.31196	9.38568	FALSE	0	1.93e-06	3.34e-05	-0.297	0.00216582	0.0124	0.144	0.00132993	0.031	-0.153	0.00348	0.149	-0.00431	-0.148	TRUE	FALSE	FALSE	TRUE
Q9DCX1	Mad2l1bp	6.62099	6.02621	6.2514	6.83755	6.0278	6.47865	6.34511	6.52207	6.09324	5.79852	5.60097	5.7482	5.69923	6.17208	6.3977	5.70602	FALSE	0	0.00599492	0.0188	-0.624	0.358031	0.539	0.184	0.0386884	0.173	-0.44	0.198	0.289	-0.152	-0.335	TRUE	FALSE	FALSE	TRUE
Q9DCT8	Crip2	9.72036	10.1168	10.1768	9.96068	10.1637	9.88111	9.94459	10.1815	10.3226	10.2953	10.3455	10.4154	10.2876	10.2645	10.29	10.1818	FALSE	0	0.00146086	0.00609	0.351	0.336127	0.515	-0.0888	0.0106129	0.0867	0.262	-0.117	-0.166	0.0967	0.185	TRUE	FALSE	FALSE	TRUE
Q9DCR2	Ap3s1	10.0038	9.86897	9.56928	10.1441	9.46287	9.6916	9.32724	9.45	9.32648	9.34873	9.25246	9.26787	9.4384	9.44992	9.89699	9.34048	FALSE	0	0.000331392	0.00188	-0.598	0.088442	0.205	0.233	0.0121936	0.0922	-0.365	-0.0695	0.344	-0.021	-0.254	TRUE	FALSE	FALSE	TRUE
Q9DCD0	Pgd	11.0412	11.0676	11.1727	11.107	11.0382	10.9749	11.0168	11.0019	11.4313	11.4043	11.4097	11.4097	11.171	11.1642	11.2022	11.232	FALSE	0	1.23e-07	4.12e-06	0.317	8.28e-06	0.000175	-0.221	0.0110683	0.0885	0.0952	-0.17	-0.0807	0.0146	0.236	TRUE	FALSE	FALSE	TRUE
Q9DCC8	Tomm20	9.68591	9.54258	9.37015	9.18754	9.45357	9.16523	9.18776	9.30613	9.10105	9.11353	9.09884	9.17102	9.21235	9.30843	9.44845	9.37992	FALSE	0	0.00331476	0.0117	-0.325	0.0343165	0.102	0.216	0.256037	0.505	-0.109	-0.0176	0.151	0.0415	-0.175	TRUE	FALSE	FALSE	TRUE
Q9DCA2	Mrps11	8.6907	8.3144	8.26228	8.55387	7.9468	8.06121	8.11744	8.15362	7.9467	8.08846	7.82989	7.81788	8.18635	8.04486	8.40949	8.03053	FALSE	0	0.000137402	0.000952	-0.535	0.031277	0.0953	0.247	0.0145911	0.102	-0.288	-0.0836	0.302	0.0144	-0.233	TRUE	FALSE	FALSE	TRUE
Q9DC50	Crot	9.08743	9.04882	8.88382	9.02095	8.83882	9.03696	9.17181	9.09214	9.32667	9.36114	9.28456	9.17442	8.99181	9.01099	9.04079	9.05849	FALSE	0	0.000837341	0.00391	0.276	0.00132298	0.00845	-0.261	0.819013	0.921	0.0153	-0.0544	-0.0791	-0.0638	0.197	TRUE	FALSE	FALSE	TRUE
Q9DC07	Nebl	10.2168	10.5094	9.82085	10.3897	9.90436	10.163	9.83683	10.1097	9.67021	9.57036	9.80646	9.64974	9.80965	9.65898	10.0697	9.6669	FALSE	0	0.00085313	0.00397	-0.56	0.355124	0.536	0.127	0.00568179	0.0618	-0.433	0.0752	0.306	-0.127	-0.254	TRUE	FALSE	FALSE	TRUE
Q9DBX2	Pdcl	7.92861	8.51599	8.04792	8.215	8.02951	8.23698	8.14545	8.24083	7.93394	7.77338	7.44986	7.96005	8.10498	7.87914	7.91254	7.7698	FALSE	0	0.00765473	0.0229	-0.398	0.301247	0.479	0.137	0.0611849	0.23	-0.26	0.154	0.168	-0.0924	-0.23	TRUE	FALSE	FALSE	TRUE
Q9DBG3	Ap2b1	14.1172	14.0278	13.9139	14.0316	13.9051	13.9896	13.9564	13.9488	13.7466	13.6577	13.7902	13.738	13.9221	13.9507	14.0491	14.0135	FALSE	0	1.67e-05	0.000176	-0.289	7.37e-05	0.00091	0.251	0.408096	0.648	-0.0388	0.0276	0.1	0.0614	-0.189	TRUE	FALSE	FALSE	TRUE
Q9DBE0	Csad	7.32173	7.26512	7.25115	7.1122	7.3833	7.28822	7.36618	7.43189	7.513	7.59173	7.52921	7.57056	7.2994	7.39768	7.26315	7.2605	FALSE	0	1.31e-05	0.000144	0.314	0.000154282	0.00163	-0.246	0.181553	0.418	0.0676	0.00208	-0.128	-0.0601	0.186	TRUE	FALSE	FALSE	TRUE
Q9DBB9	Cpn2	6.31825	6.26408	6.15501	6.27779	6.14322	6.27011	6.81728	6.42901	6.9162	6.81705	6.67711	6.87499	6.37627	6.68629	6.48889	6.56468	FALSE	0	0.000203588	0.0013	0.568	0.0227683	0.0756	-0.292	0.0303764	0.151	0.275	-0.0899	-0.251	0.0243	0.317	TRUE	FALSE	FALSE	TRUE
Q9DBB8	Dhdh	9.55673	9.39116	9.33255	9.35755	9.3643	9.40529	9.39386	9.4088	9.73485	9.77115	9.84293	9.8403	9.4242	9.60821	9.60889	9.62446	FALSE	0	4.41e-06	6.36e-05	0.388	0.000748325	0.00546	-0.231	0.011345	0.0898	0.157	-0.149	-0.132	0.0249	0.256	TRUE	FALSE	FALSE	TRUE
Q9DB76	Emc9	5.78161	5.33826	5.36922	5.69159	5.59755	5.60102	5.53596	5.95992	5.2125	5.25674	5.02732	5.21052	5.51845	5.64083	5.51246	4.99495	FALSE	0	0.0198651	0.0491	-0.368	0.10925	0.238	0.24	0.375246	0.622	-0.128	0.221	0.0921	-0.0364	-0.276	TRUE	FALSE	FALSE	TRUE
Q9DB72	Btbd17	9.81312	9.93303	9.9753	9.95645	9.95628	9.96448	9.83929	9.98494	9.4427	9.24588	9.94295	9.57201	9.89768	9.85507	9.78202	9.781	FALSE	0	0.00345612	0.0121	-0.369	0.0191293	0.0663	0.278	0.403657	0.644	-0.0905	0.127	0.111	0.0201	-0.258	TRUE	FALSE	FALSE	TRUE
Q9DB20	Atp5po	13.5935	13.5322	13.3941	13.5965	13.3808	13.6135	13.3938	13.4658	13.3444	13.095	13.3182	13.3036	13.3192	13.4123	13.5524	13.534	FALSE	0	0.00283812	0.0103	-0.264	0.0215149	0.0726	0.189	0.324951	0.573	-0.0746	0.0354	0.101	0.0264	-0.163	TRUE	FALSE	FALSE	TRUE
Q9DB16	Cab39l	9.9202	9.55292	9.05291	9.25533	8.98711	9.03274	9.85434	9.65953	10.0294	10.0704	9.99318	9.88388	9.43702	9.81774	9.68085	9.59408	FALSE	0	0.0151619	0.0397	0.549	0.089859	0.207	-0.362	0.362223	0.608	0.187	-0.23	-0.169	0.0186	0.38	TRUE	FALSE	FALSE	TRUE
Q9DB15	Mrpl12	10.7072	10.2805	9.63695	9.61339	9.40575	9.53808	9.33174	9.61184	9.37923	9.19246	9.29369	9.15818	9.29806	9.36475	9.81815	9.64138	FALSE	0	0.00118451	0.00515	-0.804	0.188236	0.35	0.275	0.0184663	0.117	-0.529	-0.108	0.48	-0.0489	-0.324	TRUE	FALSE	FALSE	TRUE
Q9DAM7	Tmem263	8.6955	8.83347	8.19088	8.44874	7.87186	8.0725	8.17107	8.60378	7.82285	7.90597	7.54199	7.86532	7.92086	7.93256	8.26596	8.38501	FALSE	0	0.000455227	0.00241	-0.758	0.0597381	0.154	0.342	0.0258498	0.138	-0.416	0.0218	0.384	-0.0319	-0.374	TRUE	FALSE	FALSE	TRUE
Q9DAJ5	Dynlrb2	6.46618	6.41878	6.35963	6.33214	6.12874	6.41306	6.33931	6.73746	6.88663	7.09855	7.04238	6.64448	6.58617	6.54024	6.35642	7.03659	TRUE	4	0.00273361	0.01	0.524	0.0659585	0.166	-0.288	0.125211	0.338	0.236	-0.182	-0.192	0.0432	0.331	TRUE	FALSE	FALSE	TRUE
Q9DAI6	Fam135b	6.77212	6.8196	7.06524	6.84609	6.78986	6.53521	6.81097	6.77222	6.7211	6.20441	6.35501	6.14965	6.66833	6.67415	6.63803	6.6128	FALSE	0	0.00022976	0.00142	-0.518	0.0156178	0.057	0.291	0.0494434	0.202	-0.227	0.0749	0.224	-0.00385	-0.295	TRUE	FALSE	FALSE	TRUE
Q9D9V7	Dennd6b	7.42468	7.45226	7.3461	7.4597	7.17666	7.28721	7.43701	7.43486	7.27003	7.10485	7.0163	7.10083	7.45501	7.29407	7.31175	7.28855	FALSE	0	0.000479306	0.00251	-0.298	0.00578576	0.0269	0.214	0.227197	0.476	-0.0833	0.0302	0.117	0.0336	-0.181	TRUE	FALSE	FALSE	TRUE
Q9D9M5	Phospho2	6.50457	6.0517	5.79086	5.97487	5.81081	5.83028	6.04988	5.82906	5.56872	5.02243	5.80335	5.42946	5.30929	5.79943	5.57768	5.82144	FALSE	0	0.00253123	0.00936	-0.625	0.333021	0.512	0.171	0.0185836	0.117	-0.454	0.119	0.32	-0.134	-0.305	TRUE	FALSE	FALSE	TRUE
Q9D9M2	Usp12	8.12262	8.20502	8.10185	8.18425	8.09312	8.03586	7.94652	8.15416	7.62306	7.88251	7.66362	8.10948	8.00894	7.91715	8.12155	8.00272	FALSE	0	0.00190102	0.00748	-0.334	0.0449657	0.125	0.193	0.13043	0.346	-0.141	0.0466	0.143	0.00182	-0.191	TRUE	FALSE	FALSE	TRUE
Q9D964	Gatm	8.48294	8.31826	8.41555	8.33847	8.14974	8.42177	8.18409	8.412	8.73203	8.64215	8.76379	8.76377	8.43011	8.54971	8.46135	8.42934	FALSE	0	0.000111134	0.000801	0.337	0.00117253	0.00766	-0.258	0.235801	0.483	0.0788	-0.177	-0.0796	-0.000815	0.257	TRUE	FALSE	FALSE	TRUE
Q9D8C6	Med11	7.51929	7.34956	7.39399	7.54865	7.58144	7.75311	7.92174	7.65335	7.79121	7.68083	7.71804	7.98611	7.67389	7.51483	7.54821	7.42508	FALSE	0	0.00104818	0.00468	0.341	0.00853651	0.036	-0.254	0.309179	0.557	0.0876	0.0987	-0.176	-0.0882	0.165	TRUE	FALSE	FALSE	TRUE
Q9D8B7	Jam3	7.78235	8.16956	7.94501	8.09459	7.95816	7.8039	7.6728	7.88318	8.32036	8.37632	8.2546	8.27727	8.0868	8.07816	8.29977	8.20978	FALSE	0	0.00202666	0.00787	0.309	0.112977	0.244	-0.139	0.0558629	0.218	0.171	-0.246	-0.0779	0.0928	0.231	TRUE	FALSE	FALSE	TRUE
Q9D853	Eef1akmt2	7.44853	7.79516	7.37791	7.37347	7.43771	6.85766	6.39336	7.30751	6.97829	6.94422	7.2013	6.97452	7.08012	7.27057	7.3677	7.29979	TRUE	2	0.018531	0.0466	-0.474	0.217692	0.388	0.23	0.191998	0.434	-0.244	-0.195	0.305	0.0603	-0.17	TRUE	FALSE	FALSE	TRUE
Q9D826	Pipox	5.7513	6.04531	5.84798	5.4852	6.13764	6.07501	6.23322	6.40048	6.37646	6.62972	6.5986	5.74008	6.08332	5.69143	5.75578	6.00837	FALSE	0	0.00665339	0.0204	0.554	0.0212512	0.072	-0.451	0.5666	0.772	0.102	0.158	-0.271	-0.169	0.282	TRUE	FALSE	FALSE	TRUE
Q9D7K5	Dmac2	7.69598	7.83672	7.71843	7.63838	7.86163	7.85585	7.29533	7.989	6.91518	7.33234	7.43278	7.6141	7.64804	7.81787	7.71192	7.49486	FALSE	0	0.0190035	0.0475	-0.399	0.0380747	0.11	0.345	0.724261	0.868	-0.0542	0.134	0.106	0.052	-0.293	TRUE	FALSE	FALSE	TRUE
Q9D711	Pir	7.31129	7.36485	7.42018	7.48956	7.50195	7.41317	7.37305	7.33618	7.66668	7.77754	7.69488	7.62525	7.5806	7.52074	7.51207	7.35026	FALSE	0	0.000119317	0.000845	0.295	0.00305716	0.0163	-0.2	0.114359	0.321	0.0944	-0.0901	-0.0997	-0.00522	0.195	TRUE	FALSE	FALSE	TRUE
Q9D6Y9	Gbe1	9.21716	9.39789	9.41006	9.22306	9.37555	9.22793	9.23795	9.39943	9.52586	9.72429	9.56027	9.57175	9.32878	9.38425	9.3304	9.37193	FALSE	0	0.000274732	0.00163	0.284	0.00107628	0.00718	-0.242	0.490505	0.716	0.0418	-0.0827	-0.0809	-0.0391	0.203	TRUE	FALSE	FALSE	TRUE
Q9D6T0	Nosip	7.66444	7.73669	7.63471	7.71563	7.15961	7.23696	7.55018	7.57527	7.43701	7.38738	7.04087	7.57679	7.51846	7.67911	7.57069	7.66435	FALSE	0	0.00898033	0.0261	-0.327	0.0379312	0.11	0.248	0.473147	0.704	-0.0797	-0.129	0.179	0.0989	-0.149	TRUE	FALSE	FALSE	TRUE
Q9D6J6	Ndufv2	13.3562	13.5475	13.1909	13.2906	13.239	13.276	13.2074	13.4275	13.0153	13.0123	12.8751	13.1088	13.0596	13.1274	13.271	13.1371	FALSE	0	0.000460584	0.00243	-0.343	0.0746442	0.182	0.146	0.0206241	0.123	-0.198	0.0911	0.15	-0.0476	-0.193	TRUE	FALSE	FALSE	TRUE
Q9D6J5	Ndufb8	10.7445	11.1141	11.1753	11.0506	11.1632	10.9789	10.8369	10.9519	10.8245	10.7376	10.6533	10.6266	10.8118	10.6984	10.8299	10.9085	FALSE	0	0.00368014	0.0126	-0.311	0.274676	0.452	0.102	0.0346501	0.163	-0.209	0.101	0.14	-0.0695	-0.171	TRUE	FALSE	FALSE	TRUE
Q9D4C9	Clvs1	10.7199	10.5247	10.5398	10.6663	10.5013	10.7063	10.5317	10.6206	10.365	10.4065	10.2116	10.3738	10.4635	10.4383	10.485	10.4642	FALSE	0	0.000275136	0.00163	-0.273	0.0476278	0.13	0.124	0.0195995	0.12	-0.15	0.0888	0.112	-0.0384	-0.162	TRUE	FALSE	FALSE	TRUE
Q9D3D0	Ttpal	8.69655	8.68003	8.76498	8.61849	8.66911	8.47477	8.65051	8.52764	8.28116	8.36435	8.40228	8.4502	8.64219	8.55345	8.62623	8.67493	FALSE	0	2.63e-05	0.000251	-0.316	0.000260765	0.00241	0.25	0.223615	0.473	-0.0658	0.0132	0.123	0.0569	-0.193	TRUE	FALSE	FALSE	TRUE
Q9D2V7	Coro7	10.5474	10.5944	10.5327	10.4628	10.529	10.4451	10.61	10.5646	10.2487	10.329	10.2211	10.2719	10.4105	10.2681	10.2949	10.3483	FALSE	0	3.3e-05	0.000301	-0.267	0.181513	0.34	0.0628	0.000431236	0.0181	-0.204	0.12	0.117	-0.087	-0.15	TRUE	FALSE	FALSE	TRUE
Q9D2Q2	Trmt44	6.40385	6.08524	6.17196	5.77399	6.1589	6.58634	6.61262	6.54308	6.47719	6.52417	6.83156	6.46086	6.39555	6.59685	5.99361	6.21251	TRUE	2	0.00811085	0.024	0.465	0.0910227	0.209	-0.274	0.226605	0.475	0.191	0.111	-0.256	-0.0646	0.209	TRUE	FALSE	FALSE	TRUE
Q9D2N4	Dtna	9.86927	9.65928	9.85408	9.86403	9.86993	9.89275	9.88597	9.83182	10.0484	10.0103	10.1095	10.1314	9.84875	9.90128	9.89921	9.77268	FALSE	0	9.78e-05	0.000723	0.263	0.000520899	0.00411	-0.219	0.387404	0.632	0.0438	-0.0329	-0.0914	-0.0476	0.172	TRUE	FALSE	FALSE	TRUE
Q9D2I5	Armc9	5.80042	5.64038	5.57053	5.52627	5.71518	5.46745	5.89184	5.91833	5.54673	5.02424	5.42335	5.3115	5.46232	5.5152	5.41696	5.23228	FALSE	0	0.0190243	0.0475	-0.308	0.501572	0.67	0.0802	0.0703601	0.246	-0.228	0.219	0.105	-0.122	-0.202	TRUE	FALSE	FALSE	TRUE
Q9D2H6	Sp2	6.45872	6.32972	6.28035	6.28708	5.73373	6.11348	6.23003	5.74465	5.88536	5.49773	5.89094	6.28086	6.1949	5.87249	5.60804	5.8411	FALSE	0	0.0130305	0.0351	-0.45	0.952621	0.973	-0.00959	0.0115594	0.0904	-0.46	-0.0601	0.323	-0.136	-0.127	TRUE	FALSE	FALSE	TRUE
Q9D2C2	Saal1	6.98689	6.43434	6.45911	6.63499	6.51692	6.80901	6.56985	6.69122	6.36478	6.30274	6.2692	6.29226	6.25951	6.32935	6.63967	6.50889	FALSE	0	0.0122796	0.0335	-0.322	0.27562	0.453	0.127	0.104475	0.305	-0.194	0.142	0.125	-0.0699	-0.197	TRUE	FALSE	FALSE	TRUE
Q9D1X0	Nol3	9.85406	9.74979	9.6969	9.78423	9.69855	9.73505	9.63651	9.80207	10.1768	10.2305	10.0296	10.1196	9.83189	9.90941	10.0711	9.79666	FALSE	0	3.57e-05	0.000319	0.368	0.00186638	0.0111	-0.237	0.0531111	0.211	0.131	-0.165	-0.111	0.0196	0.256	TRUE	FALSE	FALSE	TRUE
Q9D1T0	Lingo1	10.9349	11.0626	11.0668	11.088	11.0794	11.0128	10.9619	11.0563	10.7047	10.728	10.7208	10.728	10.9961	10.8109	10.9926	10.8953	FALSE	0	7.88e-06	9.82e-05	-0.318	0.000630427	0.00474	0.203	0.0275657	0.143	-0.114	0.1	0.111	-0.00373	-0.207	TRUE	FALSE	FALSE	TRUE
Q9D1M4	Eef1e1	8.22324	8.26135	7.99132	8.02496	7.93269	8.07263	8.03534	8.24765	7.95293	7.9143	7.58501	7.89706	7.6998	7.78061	7.99431	7.75144	FALSE	0	0.00937372	0.027	-0.288	0.752647	0.854	-0.0308	0.00493708	0.057	-0.319	0.112	0.165	-0.154	-0.123	TRUE	FALSE	FALSE	TRUE
Q9D1G5	Lrrc57	10.6041	10.4306	10.4776	10.5142	10.3185	10.4707	10.4203	10.4644	10.2183	10.2383	10.2727	10.169	10.3286	10.3533	10.4697	10.3084	FALSE	0	4.49e-05	0.000382	-0.282	0.0119331	0.0467	0.14	0.0113359	0.0898	-0.142	0.0398	0.128	-0.0137	-0.154	TRUE	FALSE	FALSE	TRUE
Q9D0J8	Ptms	10.3204	10.8177	10.0336	10.7572	9.20387	10.3333	9.19732	10.9293	8.8115	9.6447	7.80995	9.46205	8.60917	8.61904	9.76436	9.80428	FALSE	0	0.00480825	0.0157	-1.55	0.573944	0.726	0.267	0.0151113	0.104	-1.28	0.284	0.85	-0.433	-0.7	TRUE	FALSE	FALSE	TRUE
Q9D0E3	Lysmd1	9.13423	9.10444	9.18341	9.22718	9.03384	9.08545	8.96392	9.0856	8.83004	8.76278	8.86483	8.89298	9.03276	9.02916	9.07695	8.99057	FALSE	0	1.31e-06	2.43e-05	-0.325	0.000280287	0.00255	0.195	0.00638624	0.0661	-0.13	0.0236	0.144	0.0137	-0.181	TRUE	FALSE	FALSE	TRUE
Q9D0B6	Pbdc1	6.31206	6.50375	6.01944	6.39151	6.13963	6.31521	6.06875	6.43435	5.99488	5.97994	6.20133	5.89774	6.13709	6.0947	6.30005	5.97865	FALSE	0	0.0181871	0.0458	-0.288	0.328944	0.507	0.109	0.119175	0.329	-0.179	0.0664	0.134	-0.0454	-0.155	TRUE	FALSE	FALSE	TRUE
Q9CZU6	Cs	14.7305	14.8517	14.6741	14.6779	14.6415	14.6648	14.4933	14.7405	14.4311	14.4811	14.312	14.479	14.4912	14.3763	14.646	14.6826	FALSE	0	0.00076186	0.00361	-0.308	0.109095	0.238	0.123	0.022542	0.129	-0.184	0.0492	0.148	-0.0368	-0.16	TRUE	FALSE	FALSE	TRUE
Q9CZT8	Rab3b	11.4966	11.6405	11.4848	11.5869	11.6193	11.5919	11.5075	11.7699	11.2844	11.2797	11.1415	11.3816	11.3188	11.5723	11.5873	11.4703	FALSE	0	0.00142891	0.00599	-0.28	0.00885649	0.0371	0.215	0.375057	0.622	-0.065	0.139	0.0689	0.00384	-0.212	TRUE	FALSE	FALSE	TRUE
Q9CZN4	Shisa9	10.2317	10.0154	10.101	10.0155	9.88776	10.017	9.73365	9.85842	9.59684	9.55433	9.92017	9.62775	9.86435	9.75198	9.78637	9.94621	FALSE	0	0.000173286	0.00115	-0.416	0.0687033	0.171	0.162	0.00812684	0.0753	-0.254	0.00493	0.222	-0.032	-0.195	TRUE	FALSE	FALSE	TRUE
Q9CZH7	Mxra7	6.28533	6.68841	6.7371	6.74244	6.85377	6.59682	6.87082	7.19	7.22416	7.53116	7.16515	7.39098	6.90425	6.29591	6.8787	7.23502	FALSE	0	0.00115734	0.00506	0.715	0.013135	0.0502	-0.499	0.241893	0.489	0.215	-0.034	-0.299	-0.0834	0.416	TRUE	FALSE	FALSE	TRUE
Q9CY16	Mrps28	7.47653	8.23159	7.01428	7.8052	7.04208	7.59403	7.09974	7.80798	7.35786	7.18838	6.61784	6.6769	6.8207	7.08225	7.35174	7.42481	TRUE	1	0.0203303	0.05	-0.672	0.428281	0.607	0.21	0.0936529	0.287	-0.462	0.099	0.345	-0.117	-0.327	TRUE	FALSE	FALSE	TRUE
Q9CXW4	Rpl11	9.77428	10.0734	9.55308	9.68163	9.47713	9.56872	9.54049	9.76956	9.32529	9.40811	9.45302	9.37011	9.52563	9.34497	9.57308	9.3413	FALSE	0	0.00139719	0.00588	-0.381	0.562504	0.718	0.0571	0.00454496	0.0544	-0.324	0.0402	0.222	-0.102	-0.16	TRUE	FALSE	FALSE	TRUE
Q9CXS4	Cenpv	10.9523	10.921	10.8509	10.8949	10.7695	10.9152	10.8573	10.9816	10.6546	10.5651	10.4938	10.6926	10.7662	10.7023	10.8297	10.7048	FALSE	0	5.13e-05	0.000428	-0.303	0.0137101	0.0518	0.149	0.0114625	0.0904	-0.154	0.0964	0.12	-0.0337	-0.183	TRUE	FALSE	FALSE	TRUE
Q9CXR1	Dhrs7	8.34141	8.37274	8.23979	8.31884	8.36163	8.35626	8.49482	8.30617	8.59909	8.62485	8.61685	8.62257	8.48761	8.54748	8.52218	8.43866	FALSE	0	5.87e-06	7.79e-05	0.298	0.0155044	0.0567	-0.117	0.000782916	0.0252	0.181	-0.0735	-0.135	0.0458	0.163	TRUE	FALSE	FALSE	TRUE
Q9CXP8	Gng10	8.81293	8.91205	8.87696	8.80299	8.99618	8.8081	8.75542	9.0155	9.15241	9.07399	9.21737	9.21082	9.02266	9.18481	9.12958	9.0935	FALSE	0	0.000129416	0.000908	0.312	0.366378	0.547	-0.056	0.000759333	0.0248	0.256	-0.11	-0.153	0.104	0.16	TRUE	FALSE	FALSE	TRUE
Q9CXL1	Tmem50a	5.90978	6.14571	6.3669	5.97322	6.6304	6.1275	6.37295	6.3277	6.33775	6.56911	6.51674	6.71676	6.55321	6.48268	6.36339	6.57519	TRUE	4	0.00186384	0.00738	0.436	0.722146	0.835	-0.0415	0.00383804	0.0501	0.395	-0.00842	-0.274	0.121	0.162	TRUE	FALSE	FALSE	TRUE
Q9CXA2	L3hypdh	6.04713	6.20568	5.99326	5.82585	6.15068	5.96706	6.18721	6.36701	6.50657	6.79073	6.44928	6.33546	6.14773	6.32774	6.34012	6.11914	FALSE	0	0.000329189	0.00187	0.503	0.0176208	0.0621	-0.287	0.0627598	0.233	0.216	-0.067	-0.217	-0.00136	0.285	TRUE	FALSE	FALSE	TRUE
Q9CWX9	Ddx47	7.36703	7.268	6.86096	7.39894	7.0622	7.23017	7.25584	7.15908	6.82775	6.96749	7.06416	6.96876	7.03211	6.8917	7.1255	6.97339	FALSE	0	0.0177943	0.0451	-0.267	0.632387	0.768	0.0486	0.0455997	0.193	-0.218	0.086	0.133	-0.0851	-0.134	TRUE	FALSE	FALSE	TRUE
Q9CWX2	Ndufaf1	7.5463	7.44652	7.53781	7.58621	7.53929	7.47047	7.55804	7.35321	7.34535	7.29852	7.27772	7.1269	7.30151	7.25867	7.20327	7.43537	FALSE	0	0.000667895	0.00325	-0.267	0.551313	0.71	0.0376	0.00221862	0.0396	-0.23	0.0874	0.136	-0.0931	-0.131	TRUE	FALSE	FALSE	TRUE
Q9CWM4	Pfdn1	10.2994	9.88666	9.77842	9.55228	9.59832	9.63416	9.80741	9.79035	9.66013	9.61606	9.53154	9.40035	9.5918	9.49994	9.65514	9.3968	FALSE	0	0.0176796	0.0449	-0.327	0.896741	0.94	-0.0161	0.013628	0.0988	-0.343	0.0389	0.211	-0.133	-0.117	TRUE	FALSE	FALSE	TRUE
Q9CUN6	Smurf1	8.85664	8.99507	7.20633	7.64959	6.95873	6.58935	6.80824	7.06829	6.82417	7.00569	7.89486	6.92064	7.20012	7.13	7.38729	7.31752	TRUE	4	0.00974326	0.0278	-1.02	0.778778	0.873	0.0974	0.0171656	0.113	-0.918	-0.507	0.814	-0.105	-0.202	TRUE	FALSE	FALSE	TRUE
Q9CRD0	Ociad1	9.77573	9.78858	9.6872	9.85995	9.78349	9.5841	9.82083	9.69953	9.44492	9.53814	9.44387	9.54397	9.70206	9.71467	9.73624	9.75086	FALSE	0	6.5e-05	0.00052	-0.285	0.000428231	0.00354	0.233	0.326367	0.575	-0.0519	0.0424	0.0982	0.0463	-0.187	TRUE	FALSE	FALSE	TRUE
Q9CRB6	Tppp3	12.4049	12.3152	12.1834	12.2917	12.2296	12.2332	12.2442	12.0858	12.6745	12.6627	12.6806	12.554	12.2602	12.4711	12.3758	12.4747	FALSE	0	4.11e-05	0.000357	0.344	0.000868426	0.00614	-0.248	0.122873	0.335	0.0966	-0.186	-0.085	0.0116	0.259	TRUE	FALSE	FALSE	TRUE
Q9CR98	Fam136a	8.61062	8.26904	8.12477	8.05065	7.96802	8.04004	8.00444	8.00848	7.64336	7.60463	7.98875	7.51508	7.97035	7.83314	8.03116	8.28778	FALSE	0	0.000393853	0.00215	-0.576	0.0157089	0.0572	0.343	0.0827054	0.269	-0.233	0.00835	0.267	0.0337	-0.309	TRUE	FALSE	FALSE	TRUE
Q9CR95	Necap1	12.0363	12.0634	11.8305	12.0719	11.8214	12.0596	11.8375	11.9455	11.6631	11.6366	11.6324	11.678	11.8098	11.8831	11.9527	11.8876	FALSE	0	4.54e-05	0.000385	-0.348	0.00178648	0.0108	0.231	0.0713035	0.248	-0.117	0.0529	0.137	0.0202	-0.211	TRUE	FALSE	FALSE	TRUE
Q9CR89	Ergic2	7.91631	7.89533	8.1021	8.16394	7.98991	8.19999	8.35364	8.1442	7.54386	7.7983	7.45463	7.7549	8.0181	7.96093	7.72339	7.88856	FALSE	0	0.00150116	0.00622	-0.381	0.0180804	0.0635	0.26	0.230997	0.479	-0.122	0.24	0.0877	-0.034	-0.294	TRUE	FALSE	FALSE	TRUE
Q9CR88	Mrps14	7.49456	7.65437	7.52512	7.64687	7.97523	7.87445	7.70234	7.56496	7.16609	7.50829	7.12132	7.26217	7.32242	7.18318	7.41234	7.41721	FALSE	0	0.00528597	0.017	-0.316	0.481606	0.653	0.0693	0.0221301	0.127	-0.246	0.29	0.0908	-0.156	-0.225	TRUE	FALSE	FALSE	TRUE
Q9CR68	Uqcrfs1	12.5937	12.4365	12.1974	12.447	12.2851	12.4182	12.3709	12.2948	12.1661	12.0781	12.2023	12.1758	12.2454	12.3155	12.4182	12.3715	FALSE	0	0.00178682	0.00714	-0.263	0.0187323	0.0653	0.182	0.256807	0.506	-0.081	0.0287	0.105	0.0241	-0.158	TRUE	FALSE	FALSE	TRUE
Q9CR62	Slc25a11	12.0371	12.0491	11.8692	11.8409	11.9981	11.9764	11.9666	12.0562	11.6251	11.6733	11.5678	11.7496	11.7594	11.7278	11.9333	11.8706	FALSE	0	0.000210244	0.00134	-0.295	0.013323	0.0507	0.169	0.0525965	0.209	-0.126	0.143	0.0928	-0.0335	-0.202	TRUE	FALSE	FALSE	TRUE
Q9CR60	Golt1b	8.20168	8.13227	7.90343	8.03424	8.27129	8.26952	8.40943	8.19529	7.81874	7.73962	7.84943	7.74419	7.98349	7.89723	7.91709	8.3166	FALSE	0	0.00601851	0.0188	-0.28	0.0148151	0.0549	0.241	0.657311	0.833	-0.0393	0.244	0.0252	-0.0141	-0.255	TRUE	FALSE	FALSE	TRUE
Q9CQZ5	Ndufa6	11.545	11.6891	11.4561	11.5968	11.6717	11.4815	11.6441	11.5517	11.2677	11.3047	11.2683	11.2073	11.3993	11.4034	11.4179	11.4129	FALSE	0	2.32e-05	0.000229	-0.31	0.0111373	0.0442	0.146	0.00568684	0.0618	-0.163	0.13	0.114	-0.0489	-0.195	TRUE	FALSE	FALSE	TRUE
Q9CQX5	Cldnd1	7.31492	7.43951	7.36789	7.31387	7.10173	7.17419	6.9858	7.32784	6.94209	7.12285	7.26922	6.85457	7.37954	6.86188	7.11867	6.91022	FALSE	0	0.0147938	0.0389	-0.312	0.858574	0.919	0.0204	0.0211227	0.124	-0.291	-0.00791	0.204	-0.0877	-0.108	TRUE	FALSE	FALSE	TRUE
Q9CQX2	Cyb5b	10.322	10.3967	10.2974	10.3824	10.689	10.2176	10.6171	10.496	10.0002	9.94381	10.0231	10.29	10.2737	10.3837	10.2739	10.0257	FALSE	0	0.0137158	0.0366	-0.285	0.106335	0.234	0.175	0.294652	0.543	-0.11	0.215	0.0601	-0.0503	-0.225	TRUE	FALSE	FALSE	TRUE
Q9CQV7	Dnajc19	8.16709	8.21099	8.79256	8.99351	8.25002	8.93382	8.36633	8.52464	8.08738	6.9696	8.12369	7.97417	8.47772	7.80428	8.22678	7.67413	FALSE	0	0.0156792	0.0407	-0.752	0.364031	0.545	0.257	0.0920106	0.285	-0.495	0.295	0.317	-0.178	-0.435	TRUE	FALSE	FALSE	TRUE
Q9CQS4	Slc25a46	9.54179	9.34016	9.52895	9.44909	9.44401	9.56586	9.39941	9.19525	9.16224	9.1671	9.16793	9.27254	9.30453	9.25319	8.93904	9.20449	FALSE	0	0.00586681	0.0185	-0.273	0.841413	0.91	-0.0171	0.00390474	0.0502	-0.29	0.0927	0.157	-0.133	-0.116	TRUE	FALSE	FALSE	TRUE
Q9CQR4	Acot13	11.3986	11.5416	11.3519	11.4662	11.4707	11.3476	11.3417	11.6068	10.9864	11.1138	10.8837	11.1603	11.1852	11.2127	11.2252	11.1407	FALSE	0	3.93e-05	0.000344	-0.404	0.0406214	0.116	0.155	0.00276692	0.0439	-0.249	0.165	0.162	-0.0861	-0.241	TRUE	FALSE	FALSE	TRUE
Q9CQR2	Rps21	10.4338	10.4083	10.2772	10.4347	10.2751	10.2607	10.3292	10.2117	10.1058	10.1138	9.9465	10.0836	10.0828	10.1674	10.3799	10.3736	FALSE	0	0.000219165	0.00138	-0.326	0.0128771	0.0495	0.188	0.0565789	0.22	-0.138	0.0264	0.146	0.00818	-0.18	TRUE	FALSE	FALSE	TRUE
Q9CQM0	Nicn1	7.21873	7.46075	7.25443	7.49956	6.76097	7.19633	7.29706	7.23875	7.19458	7.13085	6.76026	6.96778	6.95763	7.20628	7.27235	7.00026	FALSE	0	0.0150233	0.0394	-0.345	0.455067	0.63	0.0958	0.065216	0.238	-0.249	-0.0278	0.207	-0.0419	-0.138	TRUE	FALSE	FALSE	TRUE
Q9CQD1	Rab5a	10.2051	10.37	10.0919	10.3617	10.0258	10.3333	10.1527	10.3868	10.001	10.0041	9.83698	10.0354	10.0284	10.0513	10.2193	10.0893	FALSE	0	0.0038909	0.0133	-0.288	0.148351	0.295	0.128	0.0757103	0.257	-0.16	0.0876	0.12	-0.04	-0.168	TRUE	FALSE	FALSE	TRUE
Q9CQ85	Timm22	10.3435	10.5972	9.81843	10.1708	9.8449	10.4224	10.2264	10.3164	9.79256	9.55526	9.57438	9.63538	9.73745	9.89066	10.1348	10.0096	FALSE	0	0.00150838	0.00623	-0.593	0.0640949	0.162	0.304	0.0761315	0.257	-0.289	0.198	0.228	-0.0613	-0.365	TRUE	FALSE	FALSE	TRUE
Q9CQ75	Ndufa2	11.5996	11.8029	11.1174	11.039	11.4972	11.1827	11.4134	11.0951	10.8322	10.8101	10.7918	10.8863	10.9649	10.8375	11.156	11.1902	FALSE	0	0.00202692	0.00787	-0.56	0.184261	0.344	0.207	0.0321047	0.156	-0.353	0.159	0.251	-0.101	-0.308	TRUE	FALSE	FALSE	TRUE
Q9CQ71	Rpa3	7.0723	7.15144	7.178	7.32976	7.51774	7.2969	7.42057	7.22784	7.56527	7.35815	7.55054	7.54233	7.3074	7.46566	7.43445	7.41289	FALSE	0	0.000462831	0.00243	0.321	0.184501	0.345	-0.099	0.0072711	0.0704	0.222	0.00131	-0.182	0.0406	0.14	TRUE	FALSE	FALSE	TRUE
Q9CQ19	Myl9	7.24099	7.31952	7.71003	7.14798	7.5173	7.34038	7.79051	7.72005	7.75266	7.88268	7.42834	7.92511	7.75273	7.65678	7.60209	7.62726	FALSE	0	0.00967528	0.0277	0.393	0.516036	0.681	-0.0875	0.0355936	0.165	0.305	0.00366	-0.234	0.0713	0.159	TRUE	FALSE	FALSE	TRUE
Q9CQ00	Dmac1	10.1754	10.225	9.88874	10.2069	10.0177	10.5431	10.0993	10.5506	8.95929	9.86014	8.81969	9.65412	9.39619	10.0411	9.48309	9.8146	FALSE	0	0.00275322	0.01	-0.801	0.125378	0.262	0.36	0.0662963	0.239	-0.44	0.444	0.266	-0.175	-0.535	TRUE	FALSE	FALSE	TRUE
Q9CPT3	Nanp	8.31754	8.16781	8.03387	8.16869	7.9467	7.98737	7.86903	7.80779	7.71547	7.88617	7.86639	7.77917	8.01091	7.82407	8.15269	7.90622	FALSE	0	0.000233755	0.00145	-0.36	0.0454689	0.126	0.162	0.0173656	0.113	-0.199	-0.0623	0.207	0.00848	-0.153	TRUE	FALSE	FALSE	TRUE
Q9CPR1	Rwdd4	7.85256	8.17347	8.23368	8.06365	8.32056	8.18604	8.23697	8.11408	8.34042	8.45239	8.59467	8.41206	8.36549	8.49041	8.22095	8.27729	FALSE	0	0.000575767	0.00287	0.369	0.203959	0.37	-0.111	0.00803423	0.0752	0.258	-0.0565	-0.19	0.0676	0.179	TRUE	FALSE	FALSE	TRUE
Q99P65	Slc29a3	3.44081	3.61846	3.24912	3.85138	3.65667	3.62045	3.93497	2.94412	4.28229	4.87953	4.39677	4.8004	4.07025	2.92737	4.06235	4.43273	TRUE	6	0.00238609	0.00893	1.05	0.0243989	0.0797	-0.717	0.260725	0.51	0.333	-0.346	-0.346	-0.0123	0.704	TRUE	FALSE	FALSE	TRUE
Q99NF2	Nsmf	11.0507	11.0649	11.1103	11.1762	11.0695	11.1195	11.0559	11.0599	10.671	10.7099	10.8133	10.7801	10.9789	10.9266	10.89	10.9633	FALSE	0	3.05e-07	8.18e-06	-0.357	0.000204855	0.00201	0.196	0.00113431	0.0288	-0.161	0.111	0.136	-0.0253	-0.221	TRUE	FALSE	FALSE	TRUE
Q99N89	Mrpl43	7.13178	6.30027	6.10195	6.12633	5.1294	6.05181	5.76812	6.25044	5.55149	5.53734	5.28566	5.55089	5.57519	5.68454	5.85069	5.8227	TRUE	2	0.0012958	0.00555	-0.934	0.298641	0.476	0.252	0.0110987	0.0885	-0.682	-0.0575	0.558	-0.124	-0.376	TRUE	FALSE	FALSE	TRUE
Q99MR0	Actl6b	8.7333	8.79248	8.87651	8.89799	8.91926	8.76165	8.6454	8.82076	8.5493	8.52906	8.62208	8.53928	8.77106	8.82818	8.7205	8.64077	FALSE	0	0.000440681	0.00235	-0.265	0.0078441	0.0337	0.18	0.166498	0.398	-0.0849	0.0588	0.0971	0.0122	-0.168	TRUE	FALSE	FALSE	TRUE
Q99ML0	Zmynd10	7.283	6.83373	6.974	7.07575	6.735	7.05491	7.04131	7.24992	7.41241	7.35423	7.70192	7.49849	7.04624	7.38345	7.33345	7.10408	TRUE	1	0.00218349	0.00835	0.45	0.0385037	0.111	-0.275	0.167836	0.4	0.175	-0.172	-0.151	0.0242	0.299	TRUE	FALSE	FALSE	TRUE
Q99M71	Epdr1	10.3595	11.2432	9.91932	10.0811	9.96398	10.1585	10.0897	10.7624	9.64421	9.84734	9.52377	9.75051	9.88555	9.8364	10.146	9.87384	FALSE	0	0.00906592	0.0263	-0.709	0.316059	0.494	0.244	0.0672104	0.241	-0.465	0.176	0.333	-0.132	-0.376	TRUE	FALSE	FALSE	TRUE
Q99M07	Coa5	6.80707	7.27459	6.70736	7.29581	6.8565	7.23942	6.84001	6.76754	6.37134	6.25859	6.41559	6.48041	6.55117	6.52918	7.0511	6.4246	FALSE	0	0.00111363	0.00492	-0.64	0.122869	0.258	0.258	0.0287087	0.146	-0.382	0.184	0.279	-0.103	-0.36	TRUE	FALSE	FALSE	TRUE
Q99LI5	Znf281	7.54955	7.22678	7.45694	7.562	7.31473	7.60456	7.50232	7.15928	7.18425	6.96101	6.93382	7.30959	7.40812	7.42022	7.22385	7.1993	FALSE	0	0.00651312	0.0201	-0.352	0.0706026	0.174	0.216	0.237914	0.486	-0.136	0.0817	0.135	-0.000648	-0.216	TRUE	FALSE	FALSE	TRUE
Q99KS6	Adprm	6.53189	7.03323	7.03784	6.70152	6.95155	6.84518	6.48488	6.98775	6.90655	7.30462	7.38386	7.36955	7.1172	6.88246	6.78848	7.11401	FALSE	0	0.0127202	0.0345	0.415	0.0892336	0.206	-0.266	0.321891	0.57	0.149	-0.148	-0.139	0.0105	0.276	TRUE	FALSE	FALSE	TRUE
Q99K30	Eps8l2	7.72943	7.50454	7.26309	7.28533	7.21771	7.17406	7.62185	7.52431	7.81411	7.71004	7.82368	7.79895	7.38711	7.7434	7.58408	7.49977	FALSE	0	0.0107607	0.0302	0.341	0.0643581	0.163	-0.233	0.368247	0.614	0.108	-0.158	-0.097	0.011	0.244	TRUE	FALSE	FALSE	TRUE
Q99JW2	Acy1	9.0475	8.86615	8.94038	9.19859	8.69917	9.01216	8.82786	8.70871	9.36363	9.28429	9.34953	9.41914	9.00486	9.21892	9.24333	9.05396	FALSE	0	0.00099551	0.0045	0.341	0.0166876	0.0598	-0.224	0.177414	0.412	0.117	-0.265	-0.0642	0.0529	0.277	TRUE	FALSE	FALSE	TRUE
Q99J56	Derl1	8.57364	9.10636	9.16414	9.01458	9.30052	9.02021	9.19187	9.18714	8.80814	8.50691	8.24131	8.43995	8.89385	8.6236	8.80198	8.42073	FALSE	0	0.0053305	0.0171	-0.466	0.21001	0.378	0.186	0.068154	0.243	-0.28	0.344	0.134	-0.146	-0.332	TRUE	FALSE	FALSE	TRUE
Q96DY5	Rnf112	8.28238	8.17527	8.16526	8.06028	8.32623	8.14406	8.42431	8.31636	7.84225	7.78039	7.9488	7.81575	8.10876	8.15374	8.02043	7.94858	FALSE	0	0.000207737	0.00133	-0.324	0.00604862	0.0278	0.211	0.106277	0.308	-0.113	0.208	0.0762	-0.0367	-0.248	TRUE	FALSE	FALSE	TRUE
Q925T6	Grip1	7.84453	8.01753	7.59048	7.71003	7.49733	7.82318	7.68037	7.8199	7.50918	7.42973	7.54135	7.53532	7.64343	7.65384	7.72526	7.73321	FALSE	0	0.0042696	0.0142	-0.287	0.0454798	0.126	0.185	0.247741	0.495	-0.102	0.033	0.118	0.0168	-0.168	TRUE	FALSE	FALSE	TRUE
Q925H0	Asic2	8.25985	8.12576	8.17745	8.27008	7.75527	8.02489	7.87864	8.07484	8.06436	7.55492	7.81498	7.80968	7.96175	8.29802	8.1792	7.90394	FALSE	0	0.00229813	0.00867	-0.397	0.022307	0.0746	0.275	0.271474	0.518	-0.123	-0.0762	0.199	0.0761	-0.199	TRUE	FALSE	FALSE	TRUE
Q925B0	Pawr	4.29123	4.64363	4.63025	3.82233	4.9972	4.59853	5.34242	4.81133	5.13442	5.18757	5.09568	5.3369	4.69166	4.76622	5.13288	5.16652	FALSE	0	0.000456623	0.00241	0.842	0.200396	0.366	-0.249	0.00646268	0.0662	0.592	0.0843	-0.506	0.0863	0.336	TRUE	FALSE	FALSE	TRUE
Q924S7	Spred2	7.6868	7.83909	7.87434	7.68219	7.63323	7.50485	7.7578	7.80035	7.4063	7.34293	7.38158	7.28329	7.66994	7.58906	7.58041	7.54061	FALSE	0	1.3e-05	0.000144	-0.417	0.00202492	0.0118	0.241	0.0157202	0.107	-0.176	0.0758	0.172	-0.00329	-0.245	TRUE	FALSE	FALSE	TRUE
Q924A2	Cic	6.94731	6.66806	6.41486	6.83735	6.3988	6.82968	6.79591	6.82297	6.40648	6.33316	6.28364	6.52095	6.68938	6.66573	6.67201	6.64344	FALSE	0	0.00919146	0.0266	-0.331	0.022276	0.0745	0.282	0.660346	0.836	-0.0493	0.0912	0.0963	0.047	-0.235	TRUE	FALSE	FALSE	TRUE
Q923M0	Ppp1r16a	8.71099	8.7255	8.53021	8.61657	8.60988	8.62349	8.56393	8.76307	8.31962	8.34213	8.25753	8.36979	8.38495	8.41301	8.60134	8.50696	FALSE	0	7.43e-05	0.000577	-0.324	0.0197545	0.068	0.154	0.0119619	0.0919	-0.169	0.119	0.125	-0.0446	-0.199	TRUE	FALSE	FALSE	TRUE
Q923L3	Csmd1	7.98011	8.02087	8.11602	8.06443	8.02205	7.95219	7.9959	7.93283	7.68732	7.80536	7.73919	7.73347	8.01508	7.90328	7.85089	7.97427	FALSE	0	5.75e-06	7.67e-05	-0.304	0.000495598	0.00395	0.195	0.0239893	0.133	-0.109	0.0512	0.121	0.0113	-0.183	TRUE	FALSE	FALSE	TRUE
Q922R5	Ppp4r3b	5.20379	5.03468	4.37926	5.53921	5.00941	5.24652	5.33925	5.01994	5.70304	5.57005	5.57716	5.51014	5.61247	4.87847	5.56381	5.63741	FALSE	0	0.0191564	0.0477	0.551	0.43601	0.614	-0.167	0.0865905	0.276	0.384	-0.148	-0.262	0.122	0.289	TRUE	FALSE	FALSE	TRUE
Q922B6	Traf7	6.95657	6.79529	6.99238	7.08932	6.86569	6.75645	6.91094	6.71166	6.59975	6.3848	6.51131	6.66034	6.77611	6.93708	6.51873	6.86267	FALSE	0	0.000353957	0.00198	-0.419	0.020392	0.0697	0.235	0.0586918	0.224	-0.185	0.0406	0.188	0.00308	-0.232	TRUE	FALSE	FALSE	TRUE
Q921K8	Tcaf2	7.49459	7.47001	7.50892	7.63374	7.295	7.88922	7.6678	7.81936	7.9688	7.97908	8.02166	7.64343	7.6808	7.75961	7.52252	7.68589	TRUE	1	0.00499909	0.0162	0.376	0.0515944	0.138	-0.241	0.252058	0.5	0.135	-0.0222	-0.163	-0.0278	0.213	TRUE	FALSE	FALSE	TRUE
Q921I0	Ormdl1	5.70915	7.14865	6.42498	6.23839	7.25845	6.98356	7.16936	7.10594	7.35443	7.90488	7.83215	7.34879	7.36547	6.75701	7.12426	7.6494	FALSE	0	0.000250634	0.00153	1.23	0.149948	0.296	-0.386	0.00492586	0.057	0.844	0.0434	-0.706	0.138	0.524	TRUE	FALSE	FALSE	TRUE
Q920V1	B3galnt1	6.33645	7.03919	6.45449	6.57631	6.66981	6.03291	6.54688	6.75648	6.03363	6.00138	6.10346	6.09082	6.33695	6.19878	6.57947	6.58789	TRUE	1	0.00438213	0.0145	-0.544	0.0377446	0.11	0.368	0.292273	0.541	-0.176	0.105	0.205	0.0292	-0.339	TRUE	FALSE	FALSE	TRUE
Q920Q8	Ivns1abp	8.68915	8.19978	8.45887	8.31421	8.31565	8.53996	8.48076	8.38497	8.13997	7.96255	8.13272	8.2244	8.20123	8.39402	8.16879	8.38444	FALSE	0	0.00695174	0.0212	-0.301	0.0919929	0.211	0.172	0.199014	0.441	-0.128	0.118	0.104	-0.0248	-0.197	TRUE	FALSE	FALSE	TRUE
Q920I9	Wdr7	12.375	12.4311	12.3955	12.4151	12.4154	12.3983	12.421	12.3491	12.089	12.1043	12.1252	12.0965	12.3406	12.2829	12.3362	12.3713	FALSE	0	6.63e-08	2.55e-06	-0.3	1.78e-06	5.3e-05	0.229	0.0290575	0.147	-0.0715	0.0868	0.095	0.0236	-0.205	TRUE	FALSE	FALSE	TRUE
Q91Z31	Ptbp2	11.6145	11.4735	11.4258	11.502	11.4013	11.6472	11.5312	11.523	11.2243	11.1092	11.2231	11.2771	11.3632	11.4046	11.5197	11.4816	FALSE	0	0.000154103	0.00105	-0.296	0.00118628	0.00773	0.234	0.304085	0.552	-0.0617	0.106	0.0839	0.0222	-0.212	TRUE	FALSE	FALSE	TRUE
Q91YQ7	Rmnd5b	7.39556	6.88289	6.90374	7.16186	6.76513	7.39409	7.2234	6.82904	6.57703	6.41177	6.98207	6.31509	6.7804	6.86039	6.71686	6.95627	FALSE	0	0.0072385	0.0219	-0.515	0.139508	0.283	0.257	0.138737	0.358	-0.258	0.168	0.201	-0.0562	-0.313	TRUE	FALSE	FALSE	TRUE
Q91YL2	Rnf126	7.63148	7.73746	7.47539	7.7293	7.97166	7.67496	7.61374	7.53741	7.32101	7.27622	7.51473	7.18969	7.3228	7.39872	7.49633	7.62174	FALSE	0	0.00602252	0.0188	-0.318	0.193663	0.357	0.134	0.0834865	0.27	-0.184	0.167	0.111	-0.0721	-0.207	TRUE	FALSE	FALSE	TRUE
Q91YI4	Arrb2	6.81022	7.09411	7.02224	7.10483	6.95134	6.90776	6.89134	7.10635	6.65393	6.54958	6.83874	6.80175	6.95874	6.95183	6.96977	6.89723	FALSE	0	0.00132887	0.00568	-0.297	0.00724866	0.0316	0.233	0.408299	0.648	-0.0635	0.0573	0.101	0.0375	-0.196	TRUE	FALSE	FALSE	TRUE
Q91YH6	Atp6v1b1	13.0171	13.0359	12.7181	12.9687	12.7612	12.6284	12.6043	12.7238	12.2917	12.5749	12.8791	12.6418	12.7034	12.5519	12.6254	12.1701	FALSE	0	0.0168406	0.0432	-0.338	0.510901	0.678	-0.0842	0.00440512	0.0535	-0.422	-0.00156	0.254	-0.168	-0.0841	TRUE	FALSE	FALSE	TRUE
Q91YH5	Atl3	8.53232	8.44732	8.50343	8.40686	8.42923	8.51391	8.53616	8.65319	8.72459	8.82684	8.77138	8.73836	8.57034	8.60818	8.50215	8.5632	FALSE	0	2e-05	0.000202	0.293	0.000627631	0.00473	-0.204	0.0791015	0.263	0.0885	-0.0498	-0.11	-0.022	0.182	TRUE	FALSE	FALSE	TRUE
Q91YD4	Trpm2	5.28154	5.7611	5.66365	5.98931	5.46664	5.88782	5.63347	5.74073	5.4068	5.43732	4.79761	5.28425	5.60708	5.45607	5.86838	5.616	TRUE	2	0.0150175	0.0394	-0.442	0.0236342	0.0778	0.405	0.820198	0.921	-0.037	0.126	0.118	0.0808	-0.325	TRUE	FALSE	FALSE	TRUE
Q91Y63	Slc13a3	8.27316	8.1528	8.13789	8.21484	7.9266	8.04683	8.36694	7.94464	7.86811	7.87979	7.63233	8.02935	7.89585	8.18535	8.00662	8.02545	FALSE	0	0.00369508	0.0127	-0.342	0.0958506	0.217	0.176	0.113488	0.32	-0.166	0.0346	0.158	-0.00834	-0.184	TRUE	FALSE	FALSE	TRUE
Q91XU0	Wrnip1	8.41646	8.4744	8.61705	8.53391	8.39945	8.56087	8.32353	8.44217	8.17789	8.04747	8.11183	7.92769	8.30369	8.37892	8.2556	8.36105	FALSE	0	4.88e-06	6.86e-05	-0.444	0.000969169	0.00666	0.259	0.00991185	0.0834	-0.186	0.0983	0.177	-0.00843	-0.267	TRUE	FALSE	FALSE	TRUE
Q91X97	Ncald	12.2365	12.5016	12.2959	12.4391	12.3384	12.2155	12.1939	12.3146	11.9458	12.0073	11.9567	11.9763	12.1484	12.2232	12.2736	12.2513	FALSE	0	4.55e-06	6.51e-05	-0.397	0.000431634	0.00356	0.253	0.020682	0.123	-0.144	0.0582	0.161	0.0167	-0.236	TRUE	FALSE	FALSE	TRUE
Q91X96	Rabif	8.4447	8.63964	8.48354	8.34009	8.51032	8.29452	8.5237	8.68191	8.1569	8.36278	8.04293	8.16773	8.53155	8.17906	8.56251	8.37874	FALSE	0	0.0105353	0.0296	-0.294	0.0368005	0.108	0.23	0.531889	0.747	-0.064	0.109	0.0832	0.0192	-0.211	TRUE	FALSE	FALSE	TRUE
Q91X20	Ash2l	7.28644	7.36447	7.37486	7.4618	7.18696	7.32812	7.04284	6.87051	6.72838	7.0692	7.24694	7.27487	7.36804	7.23997	7.31082	7.21673	FALSE	0	0.0198008	0.0489	-0.292	0.0876256	0.204	0.204	0.441757	0.675	-0.088	-0.104	0.161	0.0732	-0.131	TRUE	FALSE	FALSE	TRUE
Q91WV0	Dr1	8.80546	8.97089	8.73066	8.81672	8.99563	8.66985	8.691	8.71354	8.47486	8.52858	8.59611	8.46304	8.5869	8.70681	8.74247	8.80369	FALSE	0	0.000713242	0.00342	-0.315	0.0188103	0.0655	0.194	0.120704	0.332	-0.121	0.0615	0.125	0.00395	-0.19	TRUE	FALSE	FALSE	TRUE
Q91WB4	Plekhf2	6.29452	5.42542	6.22089	5.81834	5.96125	6.0753	6.63311	6.27212	6.47216	6.53678	6.42964	6.48522	6.07233	6.17656	5.70407	6.33296	FALSE	0	0.0114011	0.0315	0.541	0.0449909	0.125	-0.409	0.49087	0.716	0.132	0.0535	-0.242	-0.11	0.299	TRUE	FALSE	FALSE	TRUE
Q91W82	Ube2e2	7.39788	7.53092	7.40352	7.32818	7.44764	7.43255	7.50636	7.67729	6.9424	7.2503	7.10385	7.19486	7.40387	7.33476	7.1173	7.23236	FALSE	0	0.00228228	0.00864	-0.292	0.078616	0.188	0.149	0.0904022	0.282	-0.143	0.184	0.0836	-0.0594	-0.209	TRUE	FALSE	FALSE	TRUE
Q91W67	Ubl7	10.2219	10.2034	10.0128	10.2768	10.0735	10.1884	9.97743	10.1472	9.86801	9.76453	10.0139	9.86615	9.87119	9.91132	10.0349	9.92353	FALSE	0	0.000493425	0.00257	-0.301	0.407547	0.588	0.0571	0.0026361	0.0428	-0.244	0.0744	0.157	-0.087	-0.144	TRUE	FALSE	FALSE	TRUE
Q91VX9	Tmem168	8.46461	7.94435	8.38714	8.32496	7.91063	8.1489	7.50845	7.82938	7.6631	7.19575	7.38822	7.22975	7.39687	8.17268	7.89337	7.69346	FALSE	0	0.000113493	0.000815	-0.911	0.0288919	0.0898	0.42	0.0128871	0.0952	-0.491	0.0274	0.458	-0.0329	-0.453	TRUE	FALSE	FALSE	TRUE
Q91VS7	Mgst1	8.40826	8.21949	7.59718	7.96105	8.20289	8.04859	8.2596	8.39269	8.55042	8.94838	8.60997	8.70579	8.15769	8.29032	8.36298	8.44639	FALSE	0	0.000421906	0.00228	0.657	0.0167819	0.06	-0.389	0.0830558	0.269	0.268	-0.0967	-0.276	-0.00826	0.381	TRUE	FALSE	FALSE	TRUE
Q91VM5	Rbmxl1	8.14691	8.39696	6.78576	8.31663	7.3511	8.12087	7.74418	8.04418	6.81574	6.6273	6.93293	6.66408	6.51355	6.72137	7.40338	7.00605	FALSE	0	0.00196046	0.00766	-1.15	0.626693	0.764	0.151	0.00528251	0.0589	-1	0.466	0.562	-0.438	-0.589	TRUE	FALSE	FALSE	TRUE
Q91VF2	Hnmt	8.63247	8.658	8.57556	8.48857	8.76079	8.67027	8.74832	8.86131	8.8031	9.00849	8.95952	8.74964	8.81924	8.69929	8.81053	8.72933	FALSE	0	0.000302737	0.00175	0.292	0.0804012	0.191	-0.116	0.0123356	0.0929	0.176	0.0118	-0.16	0.0162	0.132	TRUE	FALSE	FALSE	TRUE
Q91VE6	Nifk	6.84506	7.05547	7.20914	6.63177	7.27262	7.1304	7.22075	6.98169	6.77718	5.88842	6.03545	6.39281	6.48982	6.41685	6.70096	6.99481	FALSE	0	0.00257244	0.00948	-0.662	0.0560357	0.147	0.377	0.13815	0.357	-0.285	0.399	0.183	-0.102	-0.479	TRUE	FALSE	FALSE	TRUE
Q8VHW2	Cacng8	11.5015	11.4151	11.4578	11.4425	11.5724	11.4441	11.5941	11.4314	11.1283	11.2191	11.1339	11.1306	11.3835	11.2668	11.4267	11.4501	FALSE	0	2.08e-05	0.000208	-0.301	0.00030936	0.00275	0.229	0.155342	0.384	-0.0725	0.136	0.0794	0.00689	-0.222	TRUE	FALSE	FALSE	TRUE
Q8VHL1	Setd7	10.8954	11.0681	11.0164	10.9105	10.9107	10.7842	10.8176	10.8345	10.6641	10.7635	10.7	10.682	10.8641	10.8516	10.7834	10.8742	FALSE	0	2.5e-05	0.000242	-0.27	0.00638278	0.0288	0.141	0.0108106	0.0879	-0.129	-0.00202	0.134	0.00456	-0.136	TRUE	FALSE	FALSE	TRUE
Q8VEK2	Rhbdd2	8.72937	8.46848	8.40071	8.56368	8.09751	8.39629	8.32068	8.37118	8.01521	8.03093	7.93656	8.20923	8.44995	8.249	8.3839	8.04494	FALSE	0	0.000167067	0.00112	-0.493	0.0303311	0.0933	0.234	0.0185355	0.117	-0.259	0.00469	0.249	-0.00978	-0.244	TRUE	FALSE	FALSE	TRUE
Q8VEH3	Arl8a	11.1325	11.2674	11.2895	11.2762	11.274	11.1133	11.1669	11.2551	11.4634	11.5082	11.5791	11.4846	11.4293	11.4797	11.3895	11.413	FALSE	0	4.36e-05	0.000376	0.267	0.100287	0.224	-0.0809	0.00116942	0.0293	0.186	-0.143	-0.104	0.0828	0.164	TRUE	FALSE	FALSE	TRUE
Q8VEC4	Calhm2	7.14155	7.19479	6.78201	6.98984	7.05427	7.00277	7.23198	6.88354	6.56236	6.60975	6.63093	6.96622	6.76313	7.06149	7.07502	6.9837	FALSE	0	0.00894598	0.026	-0.335	0.0243663	0.0797	0.279	0.618891	0.809	-0.0562	0.11	0.0937	0.0375	-0.241	TRUE	FALSE	FALSE	TRUE
Q8VE95		8.29362	8.27795	8.28635	8.16076	8.17536	8.49342	8.26025	8.30948	8.69306	8.40701	8.80577	8.62306	8.35047	8.34635	8.44198	8.48835	FALSE	0	0.000315775	0.00181	0.378	0.013452	0.0511	-0.225	0.0773491	0.26	0.152	-0.0912	-0.146	0.00596	0.231	TRUE	FALSE	FALSE	TRUE
Q8VE08	Fbxo33	7.91994	7.95924	8.09745	7.94729	7.8746	8.0169	7.85138	8.18364	7.44767	7.8297	7.53521	7.80491	8.02927	7.89157	7.50614	7.90462	FALSE	0	0.0124887	0.034	-0.327	0.140007	0.283	0.179	0.215414	0.463	-0.148	0.119	0.119	-0.0296	-0.208	TRUE	FALSE	FALSE	TRUE
Q8VDQ1	Ptgr2	8.66359	8.85797	8.93686	8.74604	8.9405	8.68335	8.88022	8.90339	9.2368	9.19989	9.04528	9.08557	8.93435	8.79452	8.91704	8.93471	FALSE	0	0.000227874	0.00142	0.341	0.00317043	0.0168	-0.247	0.197483	0.439	0.094	-0.0706	-0.121	-0.0274	0.219	TRUE	FALSE	FALSE	TRUE
Q8VDI7	Ubac1	6.64765	6.79223	6.54363	6.78727	6.83652	6.65352	7.08535	6.9083	6.36725	6.2304	6.51425	6.36547	6.61154	6.71443	6.39604	6.53069	FALSE	0	0.00385561	0.0132	-0.323	0.0574291	0.15	0.194	0.18842	0.427	-0.13	0.247	0.0687	-0.0609	-0.255	TRUE	FALSE	FALSE	TRUE
Q8VDD5	Myh9	10.6736	10.6536	10.6503	10.7367	10.6913	10.7321	10.8354	10.749	11.0198	11.0376	10.9022	10.9752	10.7623	10.8225	10.833	10.8763	FALSE	0	3.2e-06	4.91e-05	0.305	0.00163833	0.01	-0.16	0.00339847	0.0479	0.145	-0.0575	-0.131	0.0141	0.174	TRUE	FALSE	FALSE	TRUE
Q8VDC1	Fyco1	5.56033	5.0522	5.04923	5.21135	5.39683	5.19116	5.41803	5.04576	5.71939	5.57985	5.81725	5.59723	5.21031	5.46273	5.50972	5.51311	FALSE	0	0.00140587	0.00591	0.46	0.0458968	0.127	-0.254	0.0984318	0.296	0.206	-0.133	-0.178	0.0281	0.283	TRUE	FALSE	FALSE	TRUE
Q8VD33	Sgtb	9.54462	9.69074	9.58318	9.59538	9.44937	9.44104	9.31444	9.52128	9.28913	9.28378	9.24981	9.38263	9.38572	9.43965	9.47882	9.38715	FALSE	0	1.76e-05	0.000183	-0.302	0.0230748	0.0764	0.121	0.00196498	0.0379	-0.181	-0.00826	0.164	-0.017	-0.138	TRUE	FALSE	FALSE	TRUE
Q8VCY8	Plppr2	9.77624	9.58652	8.29092	9.10475	8.62257	9.3696	8.67686	8.46122	7.88307	7.52441	8.04213	8.33344	8.21963	8.10914	8.63838	8.65075	FALSE	0	0.000756947	0.0036	-1.24	0.137137	0.279	0.459	0.0172286	0.113	-0.785	0.202	0.609	-0.176	-0.635	TRUE	FALSE	FALSE	TRUE
Q8VCX5	Micu1	8.59452	8.79424	8.85185	8.82538	8.73743	8.54429	8.78595	8.69083	8.63759	8.43337	8.46865	8.4448	8.69649	8.70406	8.63508	8.56577	FALSE	0	0.00125955	0.00543	-0.27	0.0379355	0.11	0.154	0.106503	0.308	-0.116	0.039	0.116	-0.000293	-0.155	TRUE	FALSE	FALSE	TRUE
Q8VCS6	Med9	7.3924	7.62641	7.73416	7.48784	7.49967	7.5696	7.66938	7.64946	7.35299	7.31174	7.31436	7.15564	7.60451	7.43141	7.19849	7.41825	FALSE	0	0.00597402	0.0187	-0.277	0.15232	0.3	0.129	0.107601	0.31	-0.147	0.134	0.0967	-0.0504	-0.18	TRUE	FALSE	FALSE	TRUE
Q8VBY2	Camkk1	10.0078	10.23	10.0457	10.1103	10.0863	10.0855	10.0124	10.1175	9.73595	9.77797	9.71141	9.86302	9.89685	10.0047	10.0168	10.1964	FALSE	0	0.000116357	0.000829	-0.326	0.000986807	0.00674	0.257	0.279207	0.528	-0.0698	0.0818	0.105	0.035	-0.222	TRUE	FALSE	FALSE	TRUE
Q8R5M8	Cadm1	11.4092	11.5934	11.5026	11.5436	11.3904	11.428	11.3307	11.4898	11.1939	11.2578	11.2765	11.253	11.414	11.3565	11.3364	11.2987	FALSE	0	3.5e-05	0.000315	-0.267	0.0332055	0.0996	0.106	0.00299991	0.0456	-0.161	0.0301	0.133	-0.0283	-0.134	TRUE	FALSE	FALSE	TRUE
Q8R5A6	Tbc1d22a	6.60911	6.86014	6.5172	6.59931	6.52556	6.51597	6.70572	6.53811	6.29719	6.43642	6.35144	6.36309	6.60783	6.47601	6.26285	6.44095	FALSE	0	0.00281263	0.0102	-0.284	0.299589	0.477	0.0849	0.0238289	0.133	-0.2	0.0647	0.14	-0.0598	-0.145	TRUE	FALSE	FALSE	TRUE
Q8R555	Crtac1	8.69513	8.59927	8.64084	8.58259	8.5826	8.68513	8.5088	8.76499	8.31047	8.44356	8.32973	8.32167	8.41476	8.39677	8.52425	8.50384	FALSE	0	0.000156687	0.00106	-0.278	0.0661494	0.166	0.109	0.00760245	0.0725	-0.17	0.116	0.11	-0.0591	-0.168	TRUE	FALSE	FALSE	TRUE
Q8R4I7	Neto1	7.29745	7.30737	7.25352	7.19427	7.24143	7.39345	7.33988	7.24485	6.87091	6.96932	6.80683	6.86619	7.09103	6.97502	7.15801	7.21956	FALSE	0	6.12e-06	8.04e-05	-0.385	0.000841264	0.00598	0.233	0.0151821	0.104	-0.152	0.166	0.124	-0.0284	-0.261	TRUE	FALSE	FALSE	TRUE
Q8R4F1	Ntng2	7.34441	7.59407	7.53712	7.73639	7.59824	7.67508	7.88261	7.76978	7.28859	7.14918	7.20603	7.26789	7.61328	7.45964	7.44225	7.43134	FALSE	0	0.000950472	0.00435	-0.325	0.00512063	0.0245	0.259	0.410179	0.649	-0.0664	0.232	0.0533	-0.0131	-0.272	TRUE	FALSE	FALSE	TRUE
Q8R4C2	Rufy2	8.74076	8.93564	8.89649	9.35242	8.82331	8.98316	8.69065	8.75382	8.57575	8.47286	8.4811	8.57735	8.86897	8.86309	8.95155	8.60617	FALSE	0	0.00102627	0.00461	-0.455	0.0178842	0.0629	0.296	0.171846	0.405	-0.159	0.0269	0.196	0.0366	-0.259	TRUE	FALSE	FALSE	TRUE
Q8R404	Micos13	10.3236	10.0843	10.1862	10.0948	10.2284	10.3112	10.2459	10.3103	9.93185	9.74021	9.84664	10.0795	10.0885	10.1814	10.1601	9.95324	FALSE	0	0.00218641	0.00836	-0.273	0.0175613	0.062	0.196	0.312613	0.559	-0.0764	0.164	0.0618	-0.0146	-0.211	TRUE	FALSE	FALSE	TRUE
Q8R3Z5	Cacnb1	9.0632	9.08882	9.05161	9.17153	9.13414	9.1778	9.11891	9.19695	8.80683	8.82171	8.72901	8.78886	9.027	9.02838	9.05081	9.06557	FALSE	0	3.51e-07	9.05e-06	-0.307	2.97e-06	8.04e-05	0.256	0.161697	0.392	-0.0509	0.137	0.0737	0.0229	-0.233	TRUE	FALSE	FALSE	TRUE
Q8R3L2	Tcf25	7.95066	7.7207	7.76223	7.2997	7.56958	7.60547	7.65571	7.69014	7.405	7.38619	7.30954	7.49097	7.49015	7.3792	7.63373	7.47424	FALSE	0	0.0148458	0.039	-0.285	0.364608	0.545	0.0964	0.0874233	0.278	-0.189	0.0788	0.132	-0.0571	-0.154	TRUE	FALSE	FALSE	TRUE
Q8R2V5	Adap2	9.17358	9.46816	9.89063	9.70783	9.74691	9.85284	9.63081	9.56512	9.37976	9.13315	8.76205	8.07423	8.50357	9.20087	9.20641	9.26085	FALSE	0	0.0107492	0.0301	-0.723	0.417393	0.597	0.206	0.0540657	0.213	-0.517	0.414	0.275	-0.242	-0.448	TRUE	FALSE	FALSE	TRUE
Q8R1T1	Chmp7	8.0098	7.93589	7.9966	7.93451	7.98287	7.99941	7.85147	7.84648	7.72312	7.63329	7.71215	7.73614	7.85028	7.90552	7.82775	7.93658	FALSE	0	2.42e-05	0.000237	-0.268	0.00105589	0.00709	0.179	0.0598878	0.228	-0.0892	0.0524	0.102	0.0124	-0.166	TRUE	FALSE	FALSE	TRUE
Q8R191	Syngr3	12.0043	11.7052	11.2586	11.6311	11.0837	11.6333	10.9929	12.0865	10.9892	10.9099	10.9961	11.1031	11.2588	11.3276	11.8087	11.3337	FALSE	0	0.00869208	0.0254	-0.65	0.0622187	0.158	0.433	0.325621	0.574	-0.218	0.0664	0.267	0.0495	-0.383	TRUE	FALSE	FALSE	TRUE
Q8R0W0	Eppk1	10.0604	9.74872	9.97745	9.90573	9.84009	9.83268	10.2912	10.0516	10.382	10.2785	10.0802	10.249	9.98739	10.1281	9.77416	10.014	FALSE	0	0.00866977	0.0254	0.324	0.0230564	0.0764	-0.271	0.627593	0.813	0.0528	-0.0337	-0.114	-0.0617	0.21	TRUE	FALSE	FALSE	TRUE
Q8R0S4	Cacnb4	10.4349	10.5517	10.5725	10.5657	10.3893	10.5198	10.4998	10.5278	10.1743	10.1334	10.1356	10.1585	10.396	10.357	10.3147	10.2767	FALSE	0	2.56e-07	7.08e-06	-0.381	0.000523954	0.00413	0.186	0.000339173	0.0166	-0.195	0.109	0.156	-0.0394	-0.225	TRUE	FALSE	FALSE	TRUE
Q8R0J7	Vps37b	8.3669	8.47182	8.39214	8.74825	8.3571	8.72316	8.62835	8.45019	8.09368	8.06832	8.13431	8.13029	8.25368	8.20648	8.37675	8.25469	FALSE	0	0.000467517	0.00245	-0.388	0.0729732	0.179	0.166	0.021458	0.125	-0.222	0.186	0.141	-0.0806	-0.247	TRUE	FALSE	FALSE	TRUE
Q8R0A7	Kiaa0513	9.65546	9.70613	9.74468	9.64605	9.62412	9.31719	9.53865	9.43059	9.3943	9.27444	9.18869	9.24215	9.55572	9.39834	9.55825	9.5146	FALSE	0	1.32e-05	0.000145	-0.413	0.00257653	0.0143	0.232	0.0125746	0.0939	-0.181	-0.0092	0.201	0.0199	-0.212	TRUE	FALSE	FALSE	TRUE
Q8R081	Hnrnpl	11.2961	11.4091	11.249	11.3345	11.1895	11.3512	11.1801	11.349	10.9582	10.9746	10.9888	11.1224	11.0852	11.0835	11.1084	11.1523	FALSE	0	3.12e-05	0.000288	-0.311	0.0841134	0.198	0.0963	0.000974782	0.0281	-0.215	0.0905	0.145	-0.0697	-0.166	TRUE	FALSE	FALSE	TRUE
Q8R066	C1qtnf4	8.11256	8.19907	7.5578	7.96493	7.9303	7.83757	7.73801	8.07027	7.44899	7.71532	7.61348	7.49377	7.67216	7.55501	8.03521	7.67152	FALSE	0	0.0101617	0.0288	-0.391	0.229321	0.401	0.166	0.109476	0.313	-0.225	0.106	0.17	-0.055	-0.221	TRUE	FALSE	FALSE	TRUE
Q8K5B2	Mcfd2	6.89862	7.58012	7.9364	7.57758	7.831	7.33533	7.57687	7.83832	8.23989	8.38991	8.16707	8.23722	8.2106	8.05734	7.81841	8.4812	FALSE	0	0.00123888	0.00535	0.76	0.547071	0.706	-0.117	0.00422019	0.0526	0.644	-0.241	-0.388	0.256	0.373	TRUE	FALSE	FALSE	TRUE
Q8K4P0	Wdr33	7.27557	7.17604	6.64456	6.91202	7.26276	6.96811	7.06713	7.06198	6.55952	6.58186	6.8034	6.59523	6.77656	6.94287	6.92684	6.99192	FALSE	0	0.00604955	0.0189	-0.367	0.0300166	0.0926	0.275	0.429877	0.664	-0.0925	0.181	0.0929	0.000399	-0.274	TRUE	FALSE	FALSE	TRUE
Q8K4J6	Mrtfa	8.12967	8.20529	7.98867	8.08616	8.0306	8.24091	8.21527	8.3961	7.93641	7.73189	7.79811	7.88897	7.96895	7.9625	8.01384	7.95697	FALSE	0	0.00180522	0.00719	-0.264	0.0666374	0.167	0.137	0.0862111	0.275	-0.127	0.186	0.0681	-0.0588	-0.196	TRUE	FALSE	FALSE	TRUE
Q8K3G5	Vrk3	6.59649	6.71759	6.68072	6.46939	7.01246	6.94115	7.11334	6.89516	6.48717	6.00741	5.90667	6.46254	6.19821	6.48769	6.65681	6.80037	FALSE	0	0.0124821	0.034	-0.4	0.0381311	0.111	0.32	0.574976	0.777	-0.0803	0.401	0.0265	-0.0538	-0.374	TRUE	FALSE	FALSE	TRUE
Q8K3F6	Kcnq3	7.68672	7.67094	7.52448	7.5983	7.68586	7.56373	7.77723	7.64525	7.52411	7.17579	7.42744	7.27982	7.40704	7.53632	7.52654	7.38206	FALSE	0	0.00217725	0.00834	-0.268	0.143532	0.288	0.111	0.0459336	0.193	-0.157	0.142	0.0944	-0.0627	-0.174	TRUE	FALSE	FALSE	TRUE
Q8K377	Lrrtm1	9.09837	9.15904	9.2584	8.95991	9.20776	9.21777	8.99628	9.28225	8.67856	8.76942	8.7755	9.04262	8.96861	8.94215	8.93221	8.80658	FALSE	0	0.00276502	0.0101	-0.302	0.27058	0.447	0.0959	0.0268298	0.141	-0.207	0.17	0.113	-0.0936	-0.189	TRUE	FALSE	FALSE	TRUE
Q8K2T1	Nmral1	8.4365	8.61667	8.70699	8.51319	8.66683	8.44379	8.4668	8.54937	8.91661	8.951	8.972	8.87823	8.71747	8.7794	8.60863	8.74087	FALSE	0	4.2e-05	0.000363	0.361	0.003368	0.0176	-0.218	0.0362676	0.167	0.143	-0.154	-0.117	0.0263	0.244	TRUE	FALSE	FALSE	TRUE
Q8K2P6	Rfesd	7.05341	6.99005	7.16037	7.0405	7.10688	6.90494	6.50722	6.9763	6.82392	6.72841	6.81795	6.40054	6.50837	6.85782	7.01363	6.95376	FALSE	0	0.015209	0.0398	-0.368	0.309373	0.487	0.141	0.109792	0.313	-0.228	0.00858	0.196	-0.0319	-0.173	TRUE	FALSE	FALSE	TRUE
Q8K285	Fcho1	6.08462	6.06156	6.09416	6.24639	6.20391	6.05979	6.12396	6.2095	5.90229	6.08294	5.62775	5.71847	5.68183	5.83297	6.23292	5.93696	FALSE	0	0.0190076	0.0475	-0.289	0.431652	0.611	0.0883	0.0871812	0.277	-0.201	0.143	0.115	-0.0851	-0.173	TRUE	FALSE	FALSE	TRUE
Q8K273	Mmgt1	7.92433	7.96447	8.24393	8.00672	8.34746	8.34674	8.15782	8.43829	7.94985	7.80134	7.55646	7.54444	7.98985	7.84046	7.89087	7.95337	FALSE	0	0.00397837	0.0135	-0.322	0.0454212	0.126	0.206	0.235041	0.483	-0.116	0.325	0.0376	-0.0786	-0.284	TRUE	FALSE	FALSE	TRUE
Q8K221	Arfip2	8.50632	8.63819	8.35734	8.42333	8.32351	8.29922	8.26309	8.5579	8.16031	8.12938	8.19684	8.17795	8.30509	8.19623	8.36321	8.22993	FALSE	0	0.000389785	0.00213	-0.315	0.13741	0.279	0.107	0.00870029	0.0787	-0.208	0.0404	0.161	-0.0469	-0.154	TRUE	FALSE	FALSE	TRUE
Q8K1C0	Angel2	8.63445	8.68283	8.53016	8.47112	8.39417	8.37609	8.5078	8.64285	8.39772	8.34881	8.21182	8.29944	8.45283	8.35505	8.35306	8.33449	FALSE	0	0.000967515	0.0044	-0.265	0.368352	0.548	0.0594	0.00612442	0.0649	-0.206	0.0432	0.143	-0.0632	-0.123	TRUE	FALSE	FALSE	TRUE
Q8K0Y7	Paxx	6.6145	6.34484	6.23645	6.08572	6.36958	6.50453	6.59483	6.6179	6.75061	6.57603	6.59899	6.60553	6.11984	6.49196	6.43851	6.54501	FALSE	0	0.0118044	0.0324	0.312	0.0481083	0.131	-0.234	0.479974	0.709	0.0785	0.0533	-0.148	-0.0696	0.164	TRUE	FALSE	FALSE	TRUE
Q8K0U4	Hspa12a	14.5128	14.5314	14.4885	14.4806	14.407	14.5307	14.3674	14.5156	14.2002	14.1557	14.157	14.2247	14.3484	14.3048	14.4074	14.3613	FALSE	0	1.22e-06	2.32e-05	-0.319	0.000705674	0.0052	0.171	0.00222912	0.0397	-0.148	0.0806	0.129	-0.0191	-0.19	TRUE	FALSE	FALSE	TRUE
Q8K0T2	Dync2li1	6.92577	6.61484	6.89473	6.57174	6.5243	6.85864	6.81735	6.86369	6.60979	6.16355	6.2144	5.99365	6.44418	6.52079	6.3349	6.40689	FALSE	0	0.000934048	0.00429	-0.506	0.157748	0.307	0.181	0.0180387	0.115	-0.325	0.219	0.204	-0.121	-0.302	TRUE	FALSE	FALSE	TRUE
Q8K0E8	Fgb	9.47321	9.10136	8.79477	8.93674	8.78547	8.82953	9.15795	9.01857	9.61261	9.70247	9.49508	9.27686	9.25773	9.53723	9.58993	9.43298	FALSE	0	0.00563993	0.0179	0.445	0.629825	0.766	-0.0673	0.0150198	0.104	0.378	-0.302	-0.174	0.204	0.272	TRUE	FALSE	FALSE	TRUE
Q8K0C4	Cyp51a1	11.0785	11.0628	11.0674	11.1523	11.0536	11.0958	11.0962	10.9488	10.7018	10.6847	10.7828	10.7563	10.9298	10.9451	11.04	11.0604	FALSE	0	9.34e-07	1.87e-05	-0.359	3.06e-05	0.000465	0.262	0.0441922	0.19	-0.0964	0.0826	0.124	0.0278	-0.235	TRUE	FALSE	FALSE	TRUE
Q8HW98	Iglon5	7.4112	7.45599	7.68926	7.68576	7.49845	7.4647	7.66194	7.63678	7.26493	7.07344	7.23238	7.12971	7.37751	7.68883	7.19275	7.35421	FALSE	0	0.00128522	0.00552	-0.385	0.0325234	0.0981	0.228	0.124532	0.337	-0.157	0.139	0.134	-0.0228	-0.251	TRUE	FALSE	FALSE	TRUE
Q8CII8	Syne4	4.91153	4.51298	4.62684	3.94603	3.99631	4.70298	4.71141	4.90443	5.08258	5.34805	5.07524	5.28195	4.84503	4.31413	5.08453	5.20741	TRUE	4	0.00919318	0.0266	0.698	0.170467	0.325	-0.334	0.138372	0.358	0.363	-0.206	-0.285	0.0783	0.412	TRUE	FALSE	FALSE	TRUE
Q8CI94	Pygb	12.4889	12.5076	12.5792	12.4611	12.5493	12.46	12.4262	12.4736	12.7953	12.8258	12.7586	12.8061	12.5557	12.6104	12.573	12.5499	FALSE	0	1.03e-06	2.01e-05	0.287	1.69e-05	0.000297	-0.224	0.0947237	0.289	0.0631	-0.112	-0.0796	-0.0165	0.208	TRUE	FALSE	FALSE	TRUE
Q8CI85	Ca12	7.70369	7.12652	6.58754	6.61855	6.84429	6.34997	7.98285	7.72332	7.99136	7.96385	7.90878	7.81104	7.37009	7.91852	7.43046	7.47334	TRUE	1	0.0115693	0.0319	0.91	0.25698	0.432	-0.371	0.107632	0.31	0.539	-0.2	-0.416	0.123	0.493	TRUE	FALSE	FALSE	TRUE
Q8CI61	Bag4	7.42056	7.6959	7.52216	7.70197	7.70755	7.54904	7.47223	7.65053	7.25544	7.44992	7.09189	7.26731	7.4192	7.28697	7.63265	7.4169	FALSE	0	0.00326875	0.0115	-0.319	0.076141	0.184	0.173	0.127461	0.341	-0.146	0.124	0.114	-0.0323	-0.205	TRUE	FALSE	FALSE	TRUE
Q8CI08	Slain2	6.76563	6.67094	6.37694	6.75594	6.47303	6.33802	6.56908	6.26745	6.28964	6.0544	6.55306	6.44075	6.47862	6.589	6.36175	6.60444	FALSE	0	0.014632	0.0386	-0.308	0.138248	0.281	0.174	0.246387	0.495	-0.134	-0.0624	0.168	0.0342	-0.14	TRUE	FALSE	FALSE	TRUE
Q8CHY6	Gatad2a	6.79701	6.60937	6.44763	6.11878	6.65035	6.68013	6.7259	6.69342	6.09286	5.93097	5.8654	6.0653	6.13427	6.28885	5.93147	6.55524	FALSE	0	0.00207483	0.00802	-0.505	0.0965223	0.218	0.239	0.0674009	0.241	-0.266	0.338	0.144	-0.122	-0.361	TRUE	FALSE	FALSE	TRUE
Q8CHT3	Ints5	7.41298	7.29178	7.24997	7.11854	7.37237	7.20885	7.33541	7.01449	6.84274	6.64312	7.07056	7.21947	7.42979	7.16359	7.03256	7.05417	FALSE	0	0.0196648	0.0488	-0.324	0.0879417	0.204	0.226	0.438629	0.672	-0.0983	0.079	0.115	0.0163	-0.21	TRUE	FALSE	FALSE	TRUE
Q8CGY8	Ogt	11.2269	11.2226	11.2103	11.216	11.138	11.277	11.1762	11.2246	10.8661	10.8815	10.8756	10.8239	11.098	11.0327	11.0861	11.1325	FALSE	0	4.89e-08	1.94e-06	-0.357	1.13e-05	0.000222	0.226	0.00172512	0.0352	-0.132	0.111	0.126	-0.00567	-0.231	TRUE	FALSE	FALSE	TRUE
Q8CGB6	Tns2	7.02778	6.92334	7.19051	6.9788	7.26356	7.266	7.20238	7.19482	7.45713	7.32822	7.26717	7.5408	7.21622	7.35929	7.27604	7.12211	FALSE	0	0.000102453	0.000748	0.368	0.0413895	0.117	-0.155	0.00792941	0.0746	0.213	0.00581	-0.196	0.0175	0.172	TRUE	FALSE	FALSE	TRUE
Q8CG79	Tp53bp2	7.37966	7.40636	7.33595	7.3337	7.32269	7.28603	7.54816	7.48385	7.66746	7.69256	7.59506	7.74154	7.45211	7.54928	7.4089	7.52797	FALSE	0	7.62e-05	0.00059	0.31	0.00462876	0.0226	-0.19	0.0505104	0.205	0.121	-0.073	-0.119	0.00136	0.191	TRUE	FALSE	FALSE	TRUE
Q8CFE6	Slc38a2	6.66793	7.24982	7.33161	7.27044	7.66678	6.99144	7.60009	7.55122	7.50459	7.64372	7.59851	7.44074	7.46475	7.40024	7.2384	7.29763	FALSE	0	0.0155032	0.0403	0.417	0.215239	0.385	-0.197	0.167879	0.4	0.22	0.0825	-0.24	-0.0196	0.177	TRUE	FALSE	FALSE	TRUE
Q8CD26	Slc35e1	5.57631	5.84473	5.71359	5.33325	5.70791	5.53155	5.97387	5.44867	5.34552	4.94445	4.83858	5.09627	4.69268	5.30097	4.79268	5.53234	FALSE	0	0.00846282	0.0248	-0.561	0.900038	0.942	0.0235	0.0109138	0.0883	-0.537	0.311	0.262	-0.275	-0.298	TRUE	FALSE	FALSE	TRUE
Q8CCP0	Nemf	7.58301	7.32352	7.21554	7.51108	7.41421	7.32743	7.45489	7.36205	6.99044	7.40029	7.0343	6.86287	7.2082	6.95631	7.29907	7.23041	FALSE	0	0.00805466	0.0239	-0.336	0.367894	0.548	0.102	0.049238	0.202	-0.235	0.129	0.147	-0.0874	-0.189	TRUE	FALSE	FALSE	TRUE
Q8CC27	Cacnb2	8.61806	8.3258	8.61509	8.59615	8.65697	8.73765	8.67241	8.54506	8.19351	8.25756	8.06249	8.21072	8.36493	8.41913	8.43588	8.53716	FALSE	0	0.000119125	0.000844	-0.358	0.00196049	0.0115	0.258	0.166045	0.398	-0.0995	0.2	0.0857	-0.0138	-0.272	TRUE	FALSE	FALSE	TRUE
Q8CC21	Ttc19	7.45079	7.48838	6.86899	7.27154	6.99083	6.98556	6.90992	6.89201	6.64533	6.6899	6.87296	6.74729	6.79298	6.75764	7.27363	7.27357	FALSE	0	0.00179238	0.00715	-0.531	0.0580564	0.151	0.286	0.0978286	0.295	-0.245	-0.0499	0.275	0.03	-0.256	TRUE	FALSE	FALSE	TRUE
Q8CBF3	Ephb1	8.30232	8.58489	8.10757	8.49889	8.08806	8.19314	8.27479	8.42138	7.8742	7.95331	7.89338	7.86765	8.14276	8.04967	8.18853	8.13225	FALSE	0	0.000101219	0.000744	-0.476	0.0212029	0.0719	0.231	0.0156031	0.107	-0.245	0.0835	0.213	-0.0325	-0.264	TRUE	FALSE	FALSE	TRUE
Q8CAK1	Iba57	8.3671	7.99555	8.07182	8.30507	7.89769	8.12358	8.18951	8.04629	7.86753	7.77564	7.59733	7.66226	7.93401	7.88762	8.06997	7.84492	FALSE	0	0.000160034	0.00108	-0.459	0.0364563	0.107	0.208	0.0146577	0.103	-0.251	0.087	0.208	-0.0431	-0.252	TRUE	FALSE	FALSE	TRUE
Q8C7M3	Trim9	9.75417	9.87364	9.75759	9.91305	9.77225	9.84438	9.79213	9.80882	9.49172	9.61079	9.60515	9.52081	9.64416	9.60962	9.60412	9.70733	FALSE	0	2.74e-05	0.000261	-0.267	0.0762378	0.184	0.0842	0.000935858	0.0276	-0.183	0.0975	0.118	-0.0656	-0.15	TRUE	FALSE	FALSE	TRUE
Q8C525	Mb21d2	8.35278	8.07545	8.4187	8.00353	7.95052	8.05833	8.133	8.12295	7.91907	7.84442	7.99399	7.98069	8.06361	8.233	8.00425	8.05544	FALSE	0	0.00551657	0.0176	-0.278	0.0903658	0.208	0.155	0.167998	0.4	-0.124	-0.00941	0.137	0.0135	-0.141	TRUE	FALSE	FALSE	TRUE
Q8C4G9	Adgra1	8.28654	8.40242	8.28295	8.35601	8.06883	8.24441	7.91065	8.26497	7.97054	7.95343	8.01878	8.09115	8.23461	8.05696	8.32826	8.26427	FALSE	0	0.000711471	0.00342	-0.324	0.0133023	0.0507	0.213	0.161702	0.392	-0.111	-0.0487	0.161	0.0501	-0.162	TRUE	FALSE	FALSE	TRUE
Q8C419	Gpr158	10.7142	10.7483	10.7432	10.7044	10.7475	10.7747	10.7416	10.7779	10.4892	10.4421	10.4541	10.4596	10.6591	10.6274	10.7076	10.6889	FALSE	0	1.56e-07	4.84e-06	-0.266	2.72e-06	7.53e-05	0.209	0.0612351	0.23	-0.0568	0.105	0.0725	0.0157	-0.194	TRUE	FALSE	FALSE	TRUE
Q8C1Z7	Bbs4	7.49827	6.80531	6.87235	7.21661	6.77072	7.03056	7.01013	6.60431	6.64657	6.88324	6.61986	6.48312	6.8547	6.67647	6.74395	6.81679	FALSE	0	0.00706053	0.0214	-0.44	0.425187	0.605	0.115	0.0353825	0.165	-0.325	0.00812	0.252	-0.0728	-0.188	TRUE	FALSE	FALSE	TRUE
Q8C1S0	Med19	6.73122	6.84546	7.13499	7.1831	7.4137	7.23612	7.3843	7.26814	7.23828	7.05042	7.36583	7.30954	6.98393	7.00725	6.78015	7.06552	FALSE	0	0.0185197	0.0466	0.267	0.0139462	0.0524	-0.282	0.887439	0.958	-0.0145	0.201	-0.151	-0.166	0.116	TRUE	FALSE	FALSE	TRUE
Q8C196	Cps1	8.17253	8.26122	8.1266	7.5968	7.53282	8.12359	7.38685	8.78833	6.55278	6.7866	7.03634	6.59386	7.6114	6.79469	8.1285	7.88373	FALSE	0	0.000833897	0.0039	-1.3	0.0138566	0.0522	0.862	0.178491	0.414	-0.435	0.372	0.453	0.0185	-0.844	TRUE	FALSE	FALSE	TRUE
Q8C190	Vps9d1	7.57858	7.41973	7.37357	7.639	7.46179	7.55965	7.34229	7.5587	7.03137	7.13672	7.07584	7.14415	7.36028	7.40274	7.48704	7.09355	FALSE	0	0.000206938	0.00132	-0.406	0.0111925	0.0444	0.239	0.0609195	0.23	-0.167	0.127	0.149	-0.0182	-0.257	TRUE	FALSE	FALSE	TRUE
Q8C172	Cers6	7.31962	7.64432	8.29706	7.8236	8.28267	7.80376	8.24244	8.53426	6.99354	7.48871	6.72069	7.12657	7.74707	7.48732	7.77153	7.09206	FALSE	0	0.00776372	0.0232	-0.689	0.0663339	0.166	0.442	0.285501	0.535	-0.247	0.567	0.123	-0.124	-0.566	TRUE	FALSE	FALSE	TRUE
Q8C0P5	Coro2a	8.49515	8.78649	8.56788	8.5216	8.59906	8.5519	8.51117	8.6218	8.34459	8.39233	8.23036	8.24954	8.46403	8.39327	8.64833	8.59476	FALSE	0	0.00088345	0.00409	-0.289	0.00622351	0.0284	0.221	0.341777	0.59	-0.0677	0.0727	0.0945	0.0268	-0.194	TRUE	FALSE	FALSE	TRUE
Q8BZZ3	Wwp1	7.30226	7.46643	7.39186	6.89756	7.34451	6.93567	7.16254	7.353	6.9622	6.94575	6.87032	7.02135	7.22547	6.96675	6.97868	7.08407	FALSE	0	0.0164981	0.0425	-0.315	0.341658	0.52	0.114	0.104382	0.305	-0.201	0.0797	0.145	-0.0555	-0.169	TRUE	FALSE	FALSE	TRUE
Q8BZT9	Lacc1	7.41085	6.72267	7.24848	6.77911	7.13214	7.02349	7.27783	7.38546	7.71681	7.69324	7.60442	7.5291	6.96277	7.43998	7.50345	7.11935	FALSE	0	0.0016088	0.00656	0.596	0.0264169	0.0844	-0.38	0.179796	0.415	0.216	-0.0796	-0.244	-0.0279	0.352	TRUE	FALSE	FALSE	TRUE
Q8BZ81	Lrrtm3	6.96406	6.76021	7.01871	6.79692	6.3554	6.80615	6.53061	6.55096	6.50202	6.492	6.68369	6.48281	6.80159	6.38069	6.62383	6.55343	FALSE	0	0.003952	0.0134	-0.345	0.627492	0.764	0.0498	0.0106302	0.0867	-0.295	-0.0832	0.241	-0.0541	-0.104	TRUE	FALSE	FALSE	TRUE
Q8BYU6	Tor1aip2	7.1651	7.19752	7.47329	7.12831	7.75565	7.16889	7.59059	7.2557	7.63052	7.78526	7.91695	7.87372	7.79446	7.68024	7.0591	7.27965	FALSE	0	0.00341538	0.012	0.561	0.0465408	0.128	-0.348	0.20466	0.449	0.212	-0.042	-0.244	-0.0313	0.317	TRUE	FALSE	FALSE	TRUE
Q8BYK6	Ythdf3	8.42244	8.43339	8.39986	8.1553	8.31664	8.21822	8.10995	8.24915	8.14614	7.96772	8.14	8.09569	8.07532	8.08199	8.18739	8.33615	FALSE	0	0.00294325	0.0106	-0.265	0.281728	0.459	0.0828	0.0270323	0.141	-0.183	0.015	0.144	-0.0382	-0.121	TRUE	FALSE	FALSE	TRUE
Q8BYK5	Phactr3	8.34009	8.39458	8.29943	8.36307	8.16511	8.10055	8.16744	8.32919	7.89258	8.10935	7.98009	8.16861	8.13374	8.27469	7.91571	8.21161	FALSE	0	0.00119638	0.00519	-0.312	0.23228	0.404	0.0963	0.0143137	0.101	-0.215	0.0127	0.171	-0.0439	-0.14	TRUE	FALSE	FALSE	TRUE
Q8BYI8	Fam234b	6.72516	6.90504	6.87542	7.01406	6.78625	6.91645	6.72932	6.77685	6.49128	6.60115	6.58682	6.65329	6.69051	6.64752	6.92703	6.86293	FALSE	0	0.00095805	0.00437	-0.297	0.0145685	0.0542	0.199	0.191998	0.434	-0.0979	0.0404	0.118	0.0202	-0.179	TRUE	FALSE	FALSE	TRUE
Q8BY89	Slc44a2	8.55188	8.38283	8.46637	8.50349	8.5714	8.4174	8.41978	8.4573	8.70319	8.78294	8.7061	8.78586	8.46313	8.59135	8.62959	8.46499	FALSE	0	0.000122197	0.000862	0.268	0.00118659	0.00773	-0.207	0.252709	0.501	0.0611	-0.0896	-0.08	-0.0188	0.188	TRUE	FALSE	FALSE	TRUE
Q8BXQ8	Fam53c	7.87271	7.63086	7.67227	7.73493	7.65115	7.59382	7.65171	7.88499	7.26464	7.13757	7.61066	7.43436	7.64598	7.65653	7.61574	7.41939	FALSE	0	0.00193647	0.00759	-0.366	0.0365249	0.107	0.223	0.159104	0.389	-0.143	0.103	0.135	-0.00792	-0.231	TRUE	FALSE	FALSE	TRUE
Q8BX10	Pgam5	7.91148	7.91187	7.82451	7.77376	7.6877	7.74711	7.57604	7.74675	7.5468	7.37208	7.48749	7.57823	7.49275	7.66204	7.79612	7.47188	FALSE	0	0.000172495	0.00115	-0.359	0.145682	0.291	0.11	0.00342305	0.0479	-0.25	0.0277	0.194	-0.056	-0.166	TRUE	FALSE	FALSE	TRUE
Q8BWW9	Pkn2	7.88328	7.56208	7.66407	7.61509	7.63625	7.85639	7.84735	7.59742	7.85337	7.9863	8.05097	8.11077	7.65966	7.80742	7.75328	7.83439	FALSE	0	0.00143682	0.00601	0.319	0.0109681	0.0437	-0.237	0.324546	0.573	0.0826	-0.0605	-0.114	-0.0312	0.205	TRUE	FALSE	FALSE	TRUE
Q8BVP5	Csnk1g2	7.47396	7.42472	7.59187	7.12186	7.2592	7.30775	7.35751	7.19182	6.88155	6.95716	7.12352	6.97847	7.08523	7.13226	7.10362	7.41011	FALSE	0	0.000550861	0.00278	-0.418	0.0543174	0.144	0.198	0.034527	0.163	-0.22	0.0665	0.191	-0.0297	-0.227	TRUE	FALSE	FALSE	TRUE
Q8BVD5	Mpp7	6.65774	6.54928	6.29314	6.25422	6.14087	6.23739	7.03176	6.99079	6.89025	7.07762	6.87619	6.91265	6.83594	6.78716	6.53761	6.4894	FALSE	0	0.0152137	0.0398	0.501	0.149135	0.296	-0.277	0.236972	0.485	0.224	-0.0599	-0.222	0.0024	0.279	TRUE	FALSE	FALSE	TRUE
Q8BV13	Cops7b	8.39807	8.25073	8.22488	8.22164	8.03431	8.30577	8.20566	8.05903	8.00189	7.99334	8.05661	7.97471	8.18606	8.09633	8.10027	8.11345	FALSE	0	0.000375715	0.00208	-0.267	0.0608163	0.156	0.117	0.0208735	0.123	-0.15	0.0123	0.135	-0.0149	-0.132	TRUE	FALSE	FALSE	TRUE
Q8BU33	Ilvbl	9.08141	9.08242	9.01634	9.04573	9.02127	9.06796	9.23373	9.14323	9.35973	9.43068	9.40002	9.40527	9.16626	9.21941	9.10136	9.14938	FALSE	0	1.53e-06	2.77e-05	0.342	7.29e-05	0.000906	-0.24	0.0330169	0.159	0.103	-0.0662	-0.126	-0.0237	0.216	TRUE	FALSE	FALSE	TRUE
Q8BTZ5	Ankrd46	7.77911	7.32902	7.33897	7.6225	7.21295	7.43933	7.26993	7.38647	7.05952	6.94763	6.74578	7.09917	7.10364	7.18653	7.39127	7.07802	FALSE	0	0.000148258	0.00102	-0.554	0.0541861	0.144	0.227	0.00889086	0.0793	-0.328	0.0778	0.268	-0.0595	-0.286	TRUE	FALSE	FALSE	TRUE
Q8BTW9	Pak4	6.93169	6.78648	6.35889	6.78575	6.54568	6.85024	6.62788	6.78495	6.30657	6.0042	6.24142	6.43275	6.35739	6.67234	6.60804	6.57933	TRUE	1	0.00159389	0.00652	-0.469	0.0227551	0.0756	0.308	0.201685	0.445	-0.161	0.148	0.161	-0.000325	-0.308	TRUE	FALSE	FALSE	TRUE
Q8BTU1	Cfap20	7.46394	7.52005	7.20521	7.35542	6.48972	7.24774	6.92345	7.20662	7.00501	7.19581	6.59712	6.71121	7.14052	7.19604	7.49353	7.0118	FALSE	0	0.00858362	0.0251	-0.509	0.0655026	0.165	0.333	0.31011	0.557	-0.176	-0.143	0.276	0.1	-0.233	TRUE	FALSE	FALSE	TRUE
Q8BTJ4	Enpp4	8.40045	8.21999	8.47416	8.34897	8.5763	8.63223	8.44809	8.22352	8.74394	8.40083	8.74606	8.75224	8.30987	8.60714	8.26377	8.27653	FALSE	0	0.0133365	0.0358	0.3	0.0142174	0.0533	-0.296	0.974628	0.991	0.00343	0.00603	-0.103	-0.0997	0.197	TRUE	FALSE	FALSE	TRUE
Q8BSZ2	Ap3s2	7.82849	8.18817	7.94034	8.13596	7.90356	7.84733	7.91791	7.92568	7.59621	7.82615	7.6122	7.79694	7.917	7.78294	7.92429	7.59448	FALSE	0	0.00292996	0.0106	-0.315	0.289159	0.468	0.0968	0.0260009	0.138	-0.219	0.04	0.165	-0.0539	-0.151	TRUE	FALSE	FALSE	TRUE
Q8BQP9	Rgs7bp	8.95734	9.03221	8.95411	8.98161	8.94107	8.91225	8.94642	8.89336	8.67929	8.6755	8.6095	8.73567	8.79521	8.76717	8.8047	8.77725	FALSE	0	1.61e-07	4.95e-06	-0.306	0.00387977	0.0197	0.111	2.83e-05	0.0043	-0.195	0.0819	0.14	-0.0553	-0.166	TRUE	FALSE	FALSE	TRUE
Q8BPN8	Dmxl2	12.8411	12.9314	12.8936	12.9134	12.9094	12.8424	12.9013	12.8454	12.603	12.641	12.6113	12.5973	12.8322	12.7911	12.8224	12.8343	FALSE	0	1.88e-07	5.56e-06	-0.282	7.04e-06	0.000155	0.207	0.0255568	0.137	-0.0749	0.074	0.0942	0.0193	-0.188	TRUE	FALSE	FALSE	TRUE
Q8BPB0	Mob1b	8.42027	8.4357	8.46895	8.47777	8.49791	8.59096	8.57414	8.57867	8.76085	8.72283	8.89652	8.90266	8.53855	8.62004	8.55555	8.62973	FALSE	0	6.73e-07	1.48e-05	0.37	9.72e-05	0.00112	-0.235	0.00791693	0.0746	0.135	-0.044	-0.154	-0.0185	0.216	TRUE	FALSE	FALSE	TRUE
Q8BP67	Rpl24	9.19232	9.79836	9.24747	9.19731	8.84248	9.04592	9.08032	9.48149	9.02727	9.0335	8.72997	8.85022	8.95617	8.92377	9.14711	8.87933	FALSE	0	0.00790712	0.0235	-0.449	0.654528	0.787	0.0664	0.019534	0.12	-0.382	0.023	0.269	-0.113	-0.179	TRUE	FALSE	FALSE	TRUE
Q8BNY6	Ncs1	11.1478	11.0453	11.0566	10.917	11.0496	11.0265	11.0893	11.1076	10.6479	10.6506	10.618	10.727	10.8875	10.8754	10.9049	11.0106	FALSE	0	1.26e-06	2.37e-05	-0.381	8.37e-05	0.001	0.259	0.0221367	0.127	-0.122	0.146	0.119	-0.00301	-0.262	TRUE	FALSE	FALSE	TRUE
Q8BNL5	Kctd6	6.95631	6.92782	6.94853	6.96076	6.94019	7.02178	6.77672	7.05294	6.66072	6.54757	6.68462	6.61969	6.98771	6.75375	6.86977	6.73604	FALSE	0	0.000167724	0.00112	-0.32	0.0051992	0.0248	0.209	0.0992887	0.297	-0.112	0.108	0.108	-0.00349	-0.212	TRUE	FALSE	FALSE	TRUE
Q8BMB3	Eif4e2	7.31989	7.25243	7.17243	7.17992	7.22559	7.23208	7.0862	6.9986	6.92562	6.87692	6.8276	7.19602	6.91307	6.82756	7.19917	7.01489	FALSE	0	0.00819035	0.0242	-0.275	0.724485	0.836	0.0321	0.0167005	0.111	-0.242	0.0576	0.153	-0.0893	-0.121	TRUE	FALSE	FALSE	TRUE
Q8BMB0	Emsy	5.80283	5.80458	6.20264	6.22267	5.92608	5.90155	6.28928	5.69269	4.97602	6.01834	5.22123	5.31038	6.21672	5.70448	5.56594	5.61731	TRUE	1	0.00953329	0.0273	-0.627	0.079878	0.191	0.395	0.285649	0.535	-0.232	0.173	0.229	-0.00344	-0.398	TRUE	FALSE	FALSE	TRUE
Q8BLY3	Lrfn3	7.97408	8.19648	8.04535	8.17486	7.80366	8.11744	7.86301	7.71812	7.87005	7.5841	7.98986	7.88908	7.94988	8.06478	7.8182	7.90809	FALSE	0	0.0152724	0.0399	-0.264	0.305241	0.483	0.102	0.111996	0.317	-0.162	-0.0599	0.162	-0.000202	-0.102	TRUE	FALSE	FALSE	TRUE
Q8BKZ9	Pdhx	11.1469	11.3142	11.0176	11.203	11.0064	11.135	11.0574	11.1046	10.8346	10.8608	10.745	10.8136	10.8241	10.8193	11.0423	11.0641	FALSE	0	0.000121126	0.000855	-0.357	0.0899843	0.208	0.124	0.00408716	0.0515	-0.233	0.0765	0.171	-0.0619	-0.186	TRUE	FALSE	FALSE	TRUE
Q8BKG3	Ptk7	9.47539	9.32136	9.50202	9.30559	9.49282	9.23611	9.65164	9.50793	9.81703	9.69065	9.76277	9.67654	9.51045	9.57934	9.3773	9.49987	FALSE	0	0.00067492	0.00328	0.336	0.00685119	0.0303	-0.245	0.261321	0.511	0.0907	-0.0533	-0.124	-0.0337	0.211	TRUE	FALSE	FALSE	TRUE
Q8BJS4	Sun2	6.47774	6.21058	6.13395	6.22576	6.56721	6.2769	6.44236	6.61374	6.73293	6.64611	6.81267	6.86472	6.56933	6.75529	6.44844	6.29236	FALSE	0	0.000211136	0.00134	0.502	0.0285425	0.0892	-0.248	0.0251783	0.136	0.254	-0.0293	-0.242	0.012	0.26	TRUE	FALSE	FALSE	TRUE
Q8BJM5	Slc30a6	4.49407	3.8664	4.28177	3.98871	3.86398	4.34872	4.39578	4.33435	4.76184	5.08299	4.62941	4.64548	4.63929	4.55521	4.18805	4.91512	TRUE	1	0.002882	0.0104	0.622	0.254481	0.429	-0.206	0.0302354	0.151	0.417	-0.201	-0.279	0.137	0.343	TRUE	FALSE	FALSE	TRUE
Q8BIZ1	Anks1b	10.5544	10.5321	10.5634	10.4011	10.5524	10.5238	10.4272	10.6226	10.2241	10.2035	10.2709	10.2396	10.4683	10.4937	10.512	10.5069	FALSE	0	1.87e-05	0.000191	-0.278	3.7e-05	0.000537	0.261	0.696795	0.855	-0.0176	0.088	0.0693	0.0517	-0.209	TRUE	FALSE	FALSE	TRUE
Q8BIX3	Arl14ep	6.47113	6.34798	6.4101	6.33811	6.22319	6.49477	6.51604	6.52214	6.19674	5.96226	6.05814	5.9557	6.23268	6.00874	6.15158	6.15261	FALSE	0	0.000307764	0.00178	-0.349	0.225468	0.397	0.0932	0.00367705	0.0496	-0.255	0.186	0.139	-0.116	-0.209	TRUE	FALSE	FALSE	TRUE
Q8BHT6	B3glct	6.3494	6.77844	6.78027	6.41663	6.7056	6.61764	6.71012	6.87516	6.91745	6.87332	6.95182	6.72705	6.77192	6.62233	6.57716	6.73393	FALSE	0	0.0101494	0.0288	0.286	0.0675844	0.168	-0.191	0.340845	0.59	0.0952	0.0141	-0.132	-0.0367	0.154	TRUE	FALSE	FALSE	TRUE
Q8BHS6	Armcx3	8.30612	8.18803	8.24252	8.24869	8.21886	8.16269	8.13734	8.21952	7.92503	7.94639	7.85642	7.89116	8.10923	8.00677	8.20429	8.18603	FALSE	0	2.03e-06	3.46e-05	-0.342	0.000190773	0.0019	0.222	0.0172431	0.113	-0.12	0.069	0.131	0.011	-0.211	TRUE	FALSE	FALSE	TRUE
Q8BHN0	Ppm1l	7.94836	7.73913	7.72175	7.94564	7.83625	7.68284	7.99787	7.80308	7.67145	7.84569	7.36624	7.357	7.64515	7.80424	7.8345	7.77348	FALSE	0	0.0179173	0.0453	-0.279	0.0696666	0.173	0.204	0.486377	0.714	-0.0744	0.0817	0.0904	0.016	-0.188	TRUE	FALSE	FALSE	TRUE
Q8BHL7	Cdc42se1	7.11805	7.28295	7.72803	7.85716	7.63915	7.28751	7.60919	7.31447	8.29764	8.23244	8.39358	8.11691	7.92936	8.04881	7.80043	7.95342	FALSE	0	9.02e-05	0.000677	0.764	0.0361675	0.106	-0.327	0.00794513	0.0747	0.436	-0.325	-0.292	0.145	0.472	TRUE	FALSE	FALSE	TRUE
Q8BHL3	Tbc1d10b	10.5655	10.5512	10.5857	10.702	10.4255	10.5796	10.4062	10.5417	10.3071	10.1872	10.3156	10.2243	10.4702	10.4676	10.518	10.4259	FALSE	0	5.57e-06	7.46e-05	-0.343	0.000645596	0.00484	0.212	0.0176381	0.114	-0.131	0.0337	0.147	0.0159	-0.196	TRUE	FALSE	FALSE	TRUE
Q8BHK0	Pnma2	8.2186	8.08308	7.73243	8.04603	8.12025	8.30322	8.16545	8.33948	7.54285	7.88201	7.36966	7.66517	7.93523	7.69197	8.09667	7.86062	FALSE	0	0.004184	0.014	-0.405	0.0327609	0.0987	0.281	0.314526	0.561	-0.124	0.291	0.0792	-0.0447	-0.326	TRUE	FALSE	FALSE	TRUE
Q8BHH2	Rab9b	8.86056	8.91251	8.97699	8.95141	8.91454	8.77864	8.91558	8.92506	8.49673	8.58186	8.61201	8.43594	8.84795	8.80569	8.61621	8.65023	FALSE	0	8.54e-06	0.000105	-0.394	0.00415134	0.0208	0.198	0.00460766	0.0549	-0.195	0.116	0.158	-0.0376	-0.236	TRUE	FALSE	FALSE	TRUE
Q8BHB9	Clic6	8.29706	7.61057	6.85318	7.28975	6.44694	6.60271	8.5343	7.87938	8.54555	8.67921	8.63865	8.49967	8.04147	8.44882	8.11148	8.13126	FALSE	0	0.0151141	0.0396	1.08	0.31367	0.492	-0.408	0.107374	0.309	0.671	-0.547	-0.4	0.27	0.678	TRUE	FALSE	FALSE	TRUE
Q8BH64	Ehd2	9.12282	8.92935	9.0364	8.98658	9.01426	9.19205	9.40214	9.23885	9.39818	9.40079	9.27307	9.29768	9.23777	9.32767	9.08494	9.28507	FALSE	0	0.00068448	0.00332	0.324	0.168626	0.323	-0.109	0.0121542	0.0921	0.215	0.0101	-0.183	0.0321	0.141	TRUE	FALSE	FALSE	TRUE
Q8BGR8	Gskip	8.26495	8.30411	8.08148	8.3343	7.97877	8.188	7.75819	8.15772	7.89559	7.96621	7.84957	7.99107	8.10456	7.95559	8.18292	7.90846	FALSE	0	0.00325373	0.0115	-0.321	0.235868	0.408	0.112	0.0373869	0.17	-0.208	-0.0369	0.189	-0.0197	-0.132	TRUE	FALSE	FALSE	TRUE
Q8BGH7	Cdc42se2	8.40422	8.27695	8.35942	8.26548	8.09194	8.36219	8.0361	8.37968	8.02653	8.1455	7.94016	7.82671	7.9917	7.95735	8.15722	8.07827	FALSE	0	0.00120638	0.00522	-0.342	0.480252	0.652	0.0614	0.005098	0.0581	-0.28	0.0738	0.183	-0.0976	-0.159	TRUE	FALSE	FALSE	TRUE
Q8BGD8	Coa6	7.99174	8.19661	7.53608	7.63997	7.65838	7.75496	7.92891	7.91072	7.42827	7.2511	6.92276	7.37961	7.30762	7.4565	7.61594	7.47853	FALSE	0	0.000768378	0.00364	-0.596	0.13856	0.281	0.219	0.0172808	0.113	-0.376	0.222	0.25	-0.126	-0.346	TRUE	FALSE	FALSE	TRUE
Q8BGB5	Limd2	9.56663	9.53466	9.58207	9.31233	9.65024	9.39416	9.69522	9.73543	9.125	9.18606	9.05215	9.28023	9.42489	9.37457	9.3221	9.3058	FALSE	0	0.000641079	0.00315	-0.338	0.0240395	0.0788	0.196	0.0881016	0.279	-0.142	0.21	0.0901	-0.052	-0.248	TRUE	FALSE	FALSE	TRUE
Q8BG60	Txnip	6.58538	6.192	5.9061	5.98866	5.78128	6.29732	6.36537	6.81577	6.95387	7.12129	7.2794	6.92294	6.44932	6.51792	6.74656	6.68029	FALSE	0	0.000241179	0.00148	0.901	0.023244	0.0768	-0.471	0.0353821	0.165	0.43	-0.223	-0.37	0.0608	0.532	TRUE	FALSE	FALSE	TRUE
Q8BG58	P4htm	7.71643	7.77347	7.73153	7.90321	7.91056	7.85816	7.78606	7.61393	7.51245	7.395	7.57026	7.57223	7.66587	7.74851	7.58048	7.67844	FALSE	0	0.00106746	0.00474	-0.269	0.0321245	0.0971	0.156	0.10706	0.309	-0.113	0.104	0.0926	-0.0202	-0.176	TRUE	FALSE	FALSE	TRUE
Q8BG39	Sv2b	11.0326	11.18	11.2177	11.1809	11.2578	11.0941	11.134	11.2048	10.8613	10.8105	10.8116	10.7769	11.1551	11.0305	11.1007	11.0056	FALSE	0	7.36e-06	9.25e-05	-0.338	0.000120663	0.00135	0.258	0.126608	0.34	-0.0798	0.119	0.0994	0.0196	-0.238	TRUE	FALSE	FALSE	TRUE
Q8BG18	Necab1	7.76025	7.91646	7.92368	8.02778	7.4209	7.83516	7.23492	7.43184	7.30819	7.17106	7.69385	7.55371	7.68686	7.65113	7.69552	7.6603	FALSE	0	0.00145761	0.00608	-0.475	0.0646748	0.163	0.242	0.0731349	0.251	-0.234	-0.143	0.284	0.0502	-0.192	TRUE	FALSE	FALSE	TRUE
Q8BFY9	Tnpo1	8.46048	8.55882	8.65496	8.66077	8.61593	8.6025	8.80436	8.5904	8.92271	8.93779	8.71238	8.84089	8.57317	8.62146	8.49181	8.73819	FALSE	0	0.0016205	0.0066	0.27	0.00307734	0.0164	-0.247	0.75164	0.885	0.0224	-0.0209	-0.0904	-0.068	0.179	TRUE	FALSE	FALSE	TRUE
Q8BFW7	Lpp	7.50317	7.58849	7.58115	7.55258	7.71049	7.56912	7.59377	7.73984	7.89961	7.98734	7.90126	7.89837	7.63178	7.69533	7.65793	7.72747	FALSE	0	5.9e-07	1.34e-05	0.365	5.33e-05	0.000713	-0.244	0.0127903	0.0946	0.122	-0.0491	-0.146	-0.0242	0.219	TRUE	FALSE	FALSE	TRUE
Q8BFV2	Pcid2	7.78218	7.68562	7.79635	7.87766	7.84298	7.51293	7.91465	7.79469	7.53954	7.55278	7.47018	7.50985	7.7682	7.79248	7.63716	7.73892	FALSE	0	0.00215441	0.00826	-0.267	0.00901421	0.0376	0.216	0.484732	0.713	-0.0513	0.0653	0.0844	0.0332	-0.183	TRUE	FALSE	FALSE	TRUE
Q8BFT9	Svop	8.30705	8.24271	8.30739	8.20935	8.02658	8.12833	8.03267	8.0129	7.8807	7.87605	7.94959	7.92727	7.97247	8.05389	8.28552	8.22494	FALSE	0	2.69e-05	0.000257	-0.358	0.00178375	0.0107	0.226	0.0408499	0.18	-0.132	-0.0397	0.177	0.0444	-0.181	TRUE	FALSE	FALSE	TRUE
Q810B7	Slitrk5	8.65844	8.50218	8.38144	8.3388	8.42206	8.55797	8.44887	8.55655	8.05698	8.16567	8.19253	8.15266	8.27627	8.30354	8.27268	8.37878	FALSE	0	0.000113007	0.000812	-0.328	0.01828	0.0641	0.166	0.0203829	0.122	-0.162	0.142	0.116	-0.0463	-0.212	TRUE	FALSE	FALSE	TRUE
Q810A3	Ttc9c	7.37838	7.44417	7.92498	7.55907	7.99433	7.7625	7.94074	7.96163	7.92384	8.09365	7.82355	7.81547	7.749	7.7953	7.58638	7.60185	FALSE	0	0.00600579	0.0188	0.337	0.0441128	0.123	-0.231	0.325495	0.574	0.106	0.143	-0.196	-0.089	0.142	TRUE	FALSE	FALSE	TRUE
Q80ZS3	Mrps26	9.03818	8.86036	8.73147	9.10525	8.41842	8.82597	8.51012	8.64631	8.43059	8.43978	7.80052	8.0852	8.37867	8.51703	8.76707	8.57772	FALSE	0	0.000107327	0.00078	-0.745	0.0191203	0.0663	0.371	0.018441	0.117	-0.374	0.0294	0.363	-0.0107	-0.382	TRUE	FALSE	FALSE	TRUE
Q80ZJ1	Rap2a	10.6158	10.6847	10.5435	10.6369	10.6238	10.667	10.4924	10.6613	10.356	10.2601	10.4226	10.3531	10.4982	10.5135	10.596	10.4892	FALSE	0	5.74e-05	0.000471	-0.272	0.00253068	0.0141	0.176	0.0659036	0.239	-0.096	0.0852	0.0943	-0.00164	-0.178	TRUE	FALSE	FALSE	TRUE
Q80Z10	Astn2	8.27893	8.26278	8.39295	8.30868	8.23649	8.30509	8.18066	8.12346	7.98343	7.97301	7.94578	8.11196	8.27545	8.10574	8.25017	8.19513	FALSE	0	3.63e-05	0.000323	-0.307	0.00154712	0.00961	0.203	0.0643735	0.236	-0.104	0.0283	0.128	0.0235	-0.18	TRUE	FALSE	FALSE	TRUE
Q80XH4	Wscd1	5.68128	6.4389	7.06021	6.29804	7.06646	6.92894	6.33755	7.10137	7.05255	7.45113	7.41455	7.45822	7.01115	6.67224	7.13821	6.98533	FALSE	0	0.00103529	0.00463	0.975	0.119703	0.253	-0.392	0.0275231	0.143	0.582	-0.0224	-0.511	0.0707	0.463	TRUE	FALSE	FALSE	TRUE
Q80XA6	Reps2	9.58715	9.30797	9.46017	9.7851	9.49659	9.47101	9.37359	9.47317	9.24718	9.13611	9.30949	9.17674	9.40416	9.42197	9.52577	9.35919	FALSE	0	0.0013031	0.00558	-0.318	0.0190471	0.0662	0.21	0.198248	0.44	-0.107	0.0451	0.127	0.0193	-0.191	TRUE	FALSE	FALSE	TRUE
Q80VP9	Asphd2	8.66005	8.83813	8.55026	8.76216	8.68185	8.40766	8.62906	8.6104	8.39654	8.2838	8.65339	8.2348	8.60566	8.56014	8.78305	8.61347	FALSE	0	0.0044392	0.0147	-0.311	0.0170079	0.0605	0.248	0.510178	0.73	-0.0621	0.00284	0.123	0.0612	-0.187	TRUE	FALSE	FALSE	TRUE
Q80UW8	Polr2e	7.99694	7.91245	7.50462	7.88307	7.52148	7.55438	7.1195	7.04069	7.17347	7.31794	7.7513	7.40029	7.58962	7.21046	7.44394	7.51717	FALSE	0	0.0151683	0.0397	-0.414	0.846349	0.912	0.0295	0.0223326	0.128	-0.384	-0.187	0.328	-0.0558	-0.0853	TRUE	FALSE	FALSE	TRUE
Q80UG2	Plxna4	11.2985	11.3524	11.3303	11.333	11.3315	11.2671	11.2299	11.3523	10.9867	11.0173	10.9879	11.0057	11.2341	11.1565	11.2357	11.1891	FALSE	0	9.12e-08	3.25e-06	-0.329	2.29e-05	0.000378	0.204	0.0020351	0.0385	-0.125	0.0885	0.122	-0.00291	-0.207	TRUE	FALSE	FALSE	TRUE
Q80U49	Cep170b	9.87663	9.95715	9.9174	9.93211	9.88417	9.88666	9.82256	9.8571	9.66092	9.61291	9.63397	9.63565	9.80126	9.74935	9.79097	9.80203	FALSE	0	1.09e-07	3.8e-06	-0.285	0.000138787	0.00149	0.15	0.000368766	0.017	-0.135	0.0613	0.12	-0.0154	-0.165	TRUE	FALSE	FALSE	TRUE
Q80TZ3	Dnajc6	11.7454	11.8568	11.8782	11.7979	11.8129	11.8107	11.7743	11.7698	11.6031	11.4896	11.5626	11.5682	11.7377	11.7365	11.6572	11.7583	FALSE	0	5.78e-06	7.69e-05	-0.264	0.000555948	0.00433	0.167	0.0214657	0.125	-0.0971	0.0695	0.0971	-2.13e-05	-0.167	TRUE	FALSE	FALSE	TRUE
Q80TS7	Ddn	9.73291	9.82655	9.9029	9.89212	9.93841	9.81729	10.0719	9.82999	9.36095	9.57096	9.53052	9.35255	9.75426	9.681	9.55366	9.83108	FALSE	0	0.000132588	0.000924	-0.385	0.00435349	0.0216	0.251	0.0928277	0.285	-0.134	0.186	0.111	-0.0229	-0.274	TRUE	FALSE	FALSE	TRUE
Q80TR4	Slit1	7.65737	7.60484	7.60063	7.76501	7.51336	7.64945	7.53742	7.47623	7.29648	7.27317	7.22362	7.23608	7.43479	7.46835	7.56309	7.4397	FALSE	0	6.62e-07	1.47e-05	-0.4	0.000372816	0.00318	0.219	0.00183937	0.0368	-0.18	0.0604	0.173	-0.00724	-0.226	TRUE	FALSE	FALSE	TRUE
Q80TR1	Adgrl1	8.74176	8.85683	8.70872	8.75258	8.69496	8.69729	8.74506	8.77575	8.34619	8.60269	8.36358	8.44817	8.58486	8.49035	8.54727	8.69148	FALSE	0	6.09e-05	0.000494	-0.325	0.0310819	0.095	0.138	0.00602008	0.0645	-0.186	0.1	0.137	-0.0495	-0.188	TRUE	FALSE	FALSE	TRUE
Q80TL1	Adcy2	8.87668	9.01393	9.06743	8.95995	9.04906	8.90629	8.86209	8.99975	8.63117	8.68845	8.6495	8.56525	8.85801	8.69897	8.75882	8.78102	FALSE	0	1.12e-05	0.000128	-0.346	0.0175716	0.062	0.141	0.00150367	0.0327	-0.205	0.119	0.144	-0.0612	-0.202	TRUE	FALSE	FALSE	TRUE
Q80TK0	Kiaa1107	9.64359	9.74094	9.68625	9.67562	9.65718	9.75029	9.45294	9.71945	9.40841	9.33423	9.47115	9.42814	9.57544	9.58349	9.66993	9.57175	FALSE	0	0.000227705	0.00142	-0.276	0.00455617	0.0223	0.19	0.147001	0.37	-0.0864	0.0594	0.101	0.0146	-0.175	TRUE	FALSE	FALSE	TRUE
Q80TJ1	Cadps	12.5121	12.53	12.538	12.6154	12.6178	12.6055	12.5939	12.5217	12.2921	12.2683	12.2857	12.2689	12.4913	12.4575	12.4764	12.5235	FALSE	0	7.39e-07	1.59e-05	-0.27	1.41e-05	0.000261	0.208	0.0761046	0.257	-0.0617	0.11	0.074	0.0123	-0.196	TRUE	FALSE	FALSE	TRUE
Q80TG9	Lrfn2	6.50787	6.8362	6.61828	6.61991	6.65826	6.41307	6.174	6.71792	6.10752	6.37598	6.35039	6.29409	6.39693	6.40537	6.46408	6.58892	FALSE	0	0.00435292	0.0145	-0.364	0.111951	0.242	0.182	0.11211	0.317	-0.182	0.0203	0.175	-0.00672	-0.189	TRUE	FALSE	FALSE	TRUE
Q80T79	Csmd3	6.24907	6.14164	6.1802	6.07052	6.0678	6.17924	5.98906	6.18662	5.98494	5.7382	5.99633	5.8082	6.06643	5.9922	6.1048	6.11836	FALSE	0	0.000701859	0.00339	-0.278	0.0111045	0.0442	0.189	0.185295	0.423	-0.0899	0.0511	0.106	0.0158	-0.173	TRUE	FALSE	FALSE	TRUE
Q80T41	Gabbr2	8.86618	8.88618	8.83345	8.76129	8.81247	8.8574	8.87447	8.86423	8.46342	8.45001	8.46995	8.54435	8.66601	8.63023	8.66201	8.80684	FALSE	0	6.84e-07	1.5e-05	-0.355	0.000196923	0.00195	0.209	0.00377842	0.0499	-0.146	0.137	0.121	-0.0243	-0.234	TRUE	FALSE	FALSE	TRUE
Q7TSH2	Phkb	9.02351	8.95565	9.00756	9.03691	8.98357	9.03677	9.11787	8.96786	9.3309	9.2891	9.23267	9.37324	9.07551	9.0993	9.07161	9.04698	FALSE	0	2.41e-06	3.94e-05	0.301	3.86e-05	0.000556	-0.233	0.110893	0.315	0.0674	-0.0765	-0.0972	-0.0297	0.203	TRUE	FALSE	FALSE	TRUE
Q7TPM9	Mtmr10	7.81293	7.85646	7.93193	7.89569	7.55391	8.04459	7.76351	8.0209	8.22381	8.20706	8.27812	8.07409	8.04449	7.89444	8.04552	7.96442	FALSE	0	0.00275458	0.01	0.322	0.0339845	0.102	-0.209	0.224074	0.473	0.113	-0.13	-0.101	0.0115	0.22	TRUE	FALSE	FALSE	TRUE
Q7TNP2	Ppp2r1b	6.84813	6.78243	7.00696	6.73907	7.15087	6.99694	7.2501	7.10223	7.29455	7.18603	7.34379	7.315	6.96978	7.26813	6.94976	7.13202	FALSE	0	5.6e-05	0.000463	0.441	0.0194433	0.0671	-0.205	0.00887428	0.0793	0.236	0.0415	-0.239	-0.00357	0.201	TRUE	FALSE	FALSE	TRUE
Q7M750	Opalin	7.89619	8.55936	9.11533	8.84811	9.20798	9.05726	8.92898	8.7854	9.1959	9.39094	9.15957	9.48341	9.13329	9.0754	9.2602	9.41804	FALSE	0	0.00287109	0.0104	0.703	0.667343	0.795	-0.0857	0.00689692	0.0688	0.617	-0.0373	-0.427	0.19	0.275	TRUE	FALSE	FALSE	TRUE
Q791V5	Mtch2	13.2154	13.0837	12.9937	13.0514	13.0858	13.1016	13.0618	13.0162	12.8104	12.745	12.834	12.7263	12.8969	12.8578	13.0941	12.9498	FALSE	0	6.48e-05	0.000519	-0.307	0.00767572	0.0331	0.171	0.0262651	0.139	-0.136	0.0961	0.116	-0.0206	-0.191	TRUE	FALSE	FALSE	TRUE
Q78JW9	Ubfd1	8.82228	9.11413	8.59755	8.93182	8.93808	8.72956	8.69572	8.71095	8.55329	8.66175	8.65906	8.46847	8.67381	8.71422	8.75687	8.84415	FALSE	0	0.00813272	0.0241	-0.281	0.098165	0.221	0.162	0.212488	0.459	-0.119	0.0266	0.124	0.00528	-0.156	TRUE	FALSE	FALSE	TRUE
Q6ZQA6	Igsf3	7.08999	6.92305	6.97856	7.11626	7.02557	7.13145	7.13681	7.00184	6.67732	6.68878	6.75786	6.81736	7.06714	6.84776	6.74669	6.94086	FALSE	0	0.000573689	0.00287	-0.292	0.0251866	0.0815	0.165	0.0761705	0.257	-0.126	0.14	0.0928	-0.0336	-0.199	TRUE	FALSE	FALSE	TRUE
Q6ZPT1	Klhl9	7.13891	7.46108	7.36764	7.45939	7.25555	7.49086	7.36903	7.28275	7.01076	7.09803	6.9782	7.20165	7.42146	7.10785	7.27895	7.26003	FALSE	0	0.00417543	0.014	-0.285	0.034751	0.103	0.195	0.3005	0.549	-0.0897	0.0882	0.0954	0.00569	-0.189	TRUE	FALSE	FALSE	TRUE
Q6VGS5	Ccdc88c	8.3407	8.27839	8.34158	8.24541	8.20693	8.31442	8.45961	8.09988	7.94678	7.97444	7.94233	8.28084	8.37274	8.21513	8.10696	8.0799	FALSE	0	0.010075	0.0286	-0.265	0.0995587	0.223	0.158	0.247539	0.495	-0.108	0.0698	0.101	-0.00669	-0.164	TRUE	FALSE	FALSE	TRUE
Q6TEK5	Vkorc1l1	9.73153	10.2009	9.27002	9.8782	9.75111	9.86438	9.35112	9.9203	8.93833	9.33245	8.74279	9.20336	8.8588	8.92388	9.81619	8.97733	FALSE	0	0.00735199	0.0222	-0.716	0.700677	0.82	0.0898	0.0160116	0.108	-0.626	0.299	0.348	-0.278	-0.368	TRUE	FALSE	FALSE	TRUE
Q6R891	Ppp1r9b	12.4573	12.6531	12.5905	12.6478	12.5289	12.4702	12.5024	12.5797	12.3065	12.2822	12.2851	12.2723	12.5487	12.4032	12.499	12.4983	FALSE	0	1.05e-05	0.000122	-0.301	0.000547446	0.00428	0.201	0.0441783	0.19	-0.0999	0.05	0.117	0.017	-0.184	TRUE	FALSE	FALSE	TRUE
Q6QWF9	Camk2n1	8.60963	9.02389	9.14178	8.77432	8.99044	8.83194	8.88645	8.93348	8.59132	8.45843	8.55891	8.60934	8.80848	8.60169	8.74619	8.63761	FALSE	0	0.00290719	0.0105	-0.333	0.142392	0.286	0.144	0.0606962	0.229	-0.189	0.148	0.125	-0.0643	-0.208	TRUE	FALSE	FALSE	TRUE
Q6PJN8	Dalrd3	5.93057	5.8829	6.23136	5.83487	5.97209	5.9419	5.6633	6.19961	5.33426	5.93636	5.71641	5.46573	5.49214	5.46459	5.62916	5.69452	FALSE	0	0.0183514	0.0462	-0.357	0.752225	0.854	-0.0431	0.00971322	0.0834	-0.4	0.17	0.196	-0.204	-0.161	TRUE	FALSE	FALSE	TRUE
Q6PGK7	Chst10	6.17253	5.81701	6.54022	6.7859	6.45637	6.71625	6.38809	6.3912	6.5364	6.67959	7.10754	6.84433	6.72927	6.81232	6.65769	6.73181	FALSE	0	0.0165103	0.0425	0.463	0.733258	0.842	-0.0592	0.0324435	0.157	0.404	-0.0974	-0.256	0.147	0.207	TRUE	FALSE	FALSE	TRUE
Q6PFY1	Fchsd1	6.50802	6.50629	6.88498	6.42627	6.86851	6.66382	6.89453	6.41874	6.97696	7.21478	7.01069	7.12697	6.82105	6.80877	6.60811	6.83886	FALSE	0	0.000543032	0.00276	0.501	0.0146909	0.0546	-0.313	0.11764	0.327	0.188	-0.0747	-0.205	-0.0169	0.296	TRUE	FALSE	FALSE	TRUE
Q6PFR5	Tra2a	9.0759	8.90635	8.89907	8.89688	8.76483	8.57079	9.032	8.80123	8.5255	8.47834	8.27727	8.70092	8.67776	8.836	8.80096	8.45926	FALSE	0	0.000875087	0.00407	-0.449	0.0851098	0.199	0.198	0.0339585	0.161	-0.251	0.0608	0.213	-0.0379	-0.236	TRUE	FALSE	FALSE	TRUE
Q6PDX6	Rnf220	7.13772	6.63056	7.18294	6.95486	6.7114	6.50105	6.56664	6.90286	6.56473	6.78947	6.5746	6.4392	6.85077	7.00472	6.73204	6.77343	TRUE	1	0.0062262	0.0193	-0.385	0.0569729	0.149	0.248	0.274129	0.523	-0.136	-0.0993	0.207	0.0704	-0.178	TRUE	FALSE	FALSE	TRUE
Q6PDN3	Mylk	7.4834	7.1825	7.23855	7.04336	7.36968	7.24043	7.62456	7.53139	7.52984	7.63652	7.45469	7.60781	7.35132	7.51348	7.40131	7.57803	FALSE	0	0.0045288	0.015	0.32	0.328548	0.507	-0.0962	0.0333168	0.159	0.224	0.0173	-0.187	0.0369	0.133	TRUE	FALSE	FALSE	TRUE
Q6P5G0	Mapk4	6.94496	6.79895	6.93907	6.6846	6.80668	6.81542	7.10718	6.93307	6.57217	6.56591	6.62383	6.49861	6.72807	6.86674	6.35464	6.71054	FALSE	0	0.0134096	0.036	-0.277	0.325211	0.504	0.0999	0.0923502	0.285	-0.177	0.169	0.095	-0.0819	-0.182	TRUE	FALSE	FALSE	TRUE
Q6P5F7	Ttyh3	9.2872	9.73805	9.67686	9.64428	9.7345	9.17294	9.38709	9.58763	9.14021	8.98608	9.08981	9.33907	9.35794	9.09036	9.27258	9.12696	FALSE	0	0.00270568	0.00992	-0.448	0.562717	0.718	0.0732	0.00883161	0.0792	-0.375	0.119	0.235	-0.14	-0.213	TRUE	FALSE	FALSE	TRUE
Q6P5F6	Slc39a10	9.28832	9.14968	9.30829	9.13964	9.37547	9.3086	9.27057	9.31543	8.91083	8.94325	8.99607	8.91393	9.26831	9.00154	9.16742	9.10548	FALSE	0	0.000165593	0.00111	-0.28	0.00335292	0.0176	0.195	0.142891	0.364	-0.0858	0.164	0.0676	-0.0182	-0.213	TRUE	FALSE	FALSE	TRUE
Q6P5C5	Smug1	7.65449	7.40487	7.5767	7.40079	7.35881	7.34127	7.36547	7.43759	7.23786	7.15998	7.15357	7.23091	7.35263	7.33304	7.28048	7.4191	FALSE	0	4.93e-05	0.000414	-0.314	0.0152682	0.0561	0.151	0.00982065	0.0834	-0.163	0.0191	0.152	-0.0104	-0.161	TRUE	FALSE	FALSE	TRUE
Q6P5B0	Rrp12	7.38908	7.4009	7.37648	7.36565	7.50126	7.47186	7.48644	7.46472	7.17962	7.03845	7.07698	7.13115	7.17984	7.33633	7.29049	7.26194	FALSE	0	3.76e-06	5.62e-05	-0.276	0.000816747	0.00584	0.161	0.00848177	0.0777	-0.116	0.172	0.0736	-0.0423	-0.203	TRUE	FALSE	FALSE	TRUE
Q6NXN1	Szrd1	6.72127	6.54402	6.4846	6.60353	6.39135	6.87946	6.69291	6.58858	6.99424	6.94185	7.20892	7.06133	6.79401	6.94053	6.82365	6.96921	FALSE	0	0.000154554	0.00105	0.463	0.0820445	0.194	-0.17	0.00590474	0.0635	0.293	-0.152	-0.202	0.0919	0.262	TRUE	FALSE	FALSE	TRUE
Q6NVG1	Lpcat4	9.46292	9.31369	9.37959	9.45577	9.27518	9.55814	9.40724	9.33034	9.12527	9.01972	9.184	9.20161	9.43379	9.41008	9.40404	9.33448	FALSE	0	0.000459707	0.00243	-0.27	0.000583784	0.00449	0.263	0.903095	0.963	-0.0074	0.0617	0.072	0.0646	-0.198	TRUE	FALSE	FALSE	TRUE
Q6NSW3	Sphkap	7.12624	7.36544	7.38939	7.40202	7.28332	7.40022	7.37805	7.4035	7.03172	6.96938	6.98236	7.01633	7.32499	7.2606	7.16361	7.29854	FALSE	0	6.39e-05	0.000513	-0.321	0.000428235	0.00354	0.262	0.322149	0.57	-0.0588	0.129	0.0835	0.0247	-0.237	TRUE	FALSE	FALSE	TRUE
Q6NS82	Retreg2	9.90134	10.0313	9.46297	9.67654	9.33541	9.55402	9.56394	9.69264	9.61629	9.40126	9.26877	9.35112	9.50903	9.47345	9.84305	9.48641	FALSE	0	0.0113407	0.0314	-0.359	0.192763	0.355	0.169	0.145261	0.367	-0.19	-0.0365	0.195	0.00501	-0.164	TRUE	FALSE	FALSE	TRUE
Q6NS52	Dgkb	11.5345	11.5491	11.5753	11.5916	11.6139	11.4682	11.5855	11.5389	11.2491	11.3044	11.2557	11.214	11.5239	11.4859	11.4898	11.5506	FALSE	0	5.31e-07	1.24e-05	-0.307	4.24e-06	0.000107	0.257	0.181273	0.417	-0.05	0.081	0.092	0.0419	-0.215	TRUE	FALSE	FALSE	TRUE
Q6KAU4	Mvb12b	8.13061	7.98968	8.01286	8.13461	7.76265	8.1474	8.13495	7.87726	7.87357	7.6815	7.89331	7.75486	7.97832	8.0469	7.89503	7.968	FALSE	0	0.00521416	0.0168	-0.266	0.0518925	0.139	0.171	0.258942	0.508	-0.0949	0.0255	0.112	0.017	-0.154	TRUE	FALSE	FALSE	TRUE
Q6IRU2	Tpm4	8.3291	8.42065	8.31399	8.28031	8.44298	8.28875	8.65799	8.54715	8.68454	8.80381	8.54271	8.63479	8.49744	8.54688	8.65286	8.61471	FALSE	0	0.000449576	0.00238	0.33	0.243701	0.417	-0.0885	0.00493818	0.057	0.242	-0.032	-0.18	0.0618	0.15	TRUE	FALSE	FALSE	TRUE
Q6DFY8	Brinp2	8.68467	8.71361	8.83307	8.58601	8.81197	8.58023	8.59303	8.75401	8.28657	8.39001	8.37763	8.25971	8.57705	8.33416	8.42999	8.45953	FALSE	0	6.72e-05	0.000533	-0.376	0.0928344	0.212	0.122	0.00206315	0.0385	-0.254	0.143	0.162	-0.0918	-0.213	TRUE	FALSE	FALSE	TRUE
Q6DFV7	Ncoa7	8.44988	8.43135	8.439	8.48409	8.4751	8.41717	8.52059	8.43074	8.1791	8.14807	8.19056	8.23133	8.36702	8.39592	8.31758	8.38456	FALSE	0	1.13e-06	2.17e-05	-0.264	7.74e-05	0.000949	0.179	0.0208628	0.123	-0.0848	0.0945	0.0847	-0.000109	-0.179	TRUE	FALSE	FALSE	TRUE
Q6A058	Armcx2	9.16126	9.21582	8.93692	9.14428	9.03274	8.96807	9.15108	9.18903	8.81258	8.85417	8.82349	8.81082	9.05284	8.97937	9.03618	9.2227	FALSE	0	0.000660187	0.00322	-0.289	0.00226858	0.0129	0.248	0.540311	0.753	-0.0418	0.0608	0.0901	0.0483	-0.199	TRUE	FALSE	FALSE	TRUE
Q69ZU6	Thsd7a	9.24826	9.19461	9.15303	9.26033	9.10957	9.25911	9.21123	9.0625	8.92215	8.82918	8.79267	8.92759	9.07237	8.97126	9.23139	9.18198	FALSE	0	4.47e-05	0.000381	-0.346	0.00101279	0.00688	0.246	0.116696	0.326	-0.0998	0.0714	0.125	0.025	-0.221	TRUE	FALSE	FALSE	TRUE
Q69ZN7	Myof	7.56001	7.29645	7.45357	7.23607	7.23168	7.19863	7.70852	7.5294	7.73766	7.79947	7.57848	7.71742	7.44427	7.64453	7.27194	7.62467	FALSE	0	0.0145262	0.0384	0.322	0.0878319	0.204	-0.212	0.357866	0.604	0.11	-0.085	-0.116	-0.0057	0.206	TRUE	FALSE	FALSE	TRUE
Q69ZI1	Sh3rf1	7.73004	7.54542	7.3252	7.44716	7.28867	7.55148	7.39616	7.04245	7.11478	6.95734	6.9535	7.27931	7.18844	7.3198	7.52286	7.24916	FALSE	0	0.00199575	0.00777	-0.436	0.052591	0.14	0.244	0.1179	0.328	-0.192	0.0127	0.205	0.0131	-0.231	TRUE	FALSE	FALSE	TRUE
Q69ZF7	Cnnm4	8.04508	7.93644	8.05614	7.95851	7.95615	8.06307	7.90024	8.10182	7.70243	7.63326	7.64215	7.8254	7.8968	7.87867	7.97549	7.72381	FALSE	0	0.000269814	0.00161	-0.298	0.016869	0.0603	0.168	0.0538774	0.213	-0.13	0.112	0.106	-0.0248	-0.193	TRUE	FALSE	FALSE	TRUE
Q69Z26	Cntn4	7.67009	7.45433	7.67422	7.57004	7.50025	7.51603	7.34122	7.19633	7.2167	7.28056	7.3036	7.45929	7.49232	7.47134	7.5694	7.48382	FALSE	0	0.00203554	0.00789	-0.277	0.0219315	0.0736	0.189	0.251098	0.499	-0.0879	-0.0615	0.142	0.0542	-0.135	TRUE	FALSE	FALSE	TRUE
Q67BT3	Slc13a5	7.19579	6.76285	7.19745	6.81714	7.06407	6.78158	6.87743	6.93896	6.71148	6.7806	6.62293	6.80553	6.8499	6.80572	6.98501	6.81088	FALSE	0	0.0165087	0.0425	-0.263	0.191575	0.354	0.133	0.198973	0.441	-0.13	0.0401	0.118	-0.0126	-0.145	TRUE	FALSE	FALSE	TRUE
Q65CL1	Ctnna3	6.82918	6.68498	6.53951	6.70058	6.76798	6.71495	6.81639	6.85646	7.22887	6.98934	7.16761	6.99768	6.65639	6.92557	6.82791	7.08012	FALSE	0	0.0002948	0.00172	0.407	0.0203413	0.0697	-0.223	0.0492099	0.202	0.184	-0.0725	-0.173	0.011	0.234	TRUE	FALSE	FALSE	TRUE
Q64727	Vcl	10.1861	10.1353	10.0992	10.2089	10.2373	10.2837	10.2889	10.2812	10.628	10.709	10.5609	10.6665	10.3434	10.371	10.4513	10.3922	FALSE	0	4.68e-09	3.54e-07	0.484	1.27e-05	0.000242	-0.252	2.99e-05	0.00435	0.232	-0.0924	-0.208	0.0243	0.276	TRUE	FALSE	FALSE	TRUE
Q64437	Adh7	8.19373	8.39909	8.29138	7.96043	8.65452	8.39201	8.01579	7.8718	7.62881	7.25982	7.59604	8.11235	7.73273	7.9552	7.84773	8.19387	FALSE	0	0.00930809	0.0268	-0.562	0.151562	0.298	0.283	0.157502	0.387	-0.279	0.227	0.205	-0.0742	-0.357	TRUE	FALSE	FALSE	TRUE
Q64336	Tbr1	6.62601	6.55987	6.52999	6.72672	6.59876	6.55967	6.6072	6.56986	6.42649	6.29546	6.19687	6.47065	6.37005	6.41531	6.40057	6.42148	FALSE	0	0.00031291	0.0018	-0.263	0.343829	0.523	0.0545	0.00210789	0.0388	-0.209	0.0979	0.125	-0.0841	-0.139	TRUE	FALSE	FALSE	TRUE
Q641P0	Actr3b	10.3237	10.5348	10.3525	10.4269	10.4978	10.2663	10.3717	10.3485	10.042	10.0431	10.0811	10.0648	10.3071	10.1937	10.3468	10.2994	FALSE	0	1.35e-05	0.000147	-0.352	0.000823622	0.00587	0.229	0.0395717	0.175	-0.123	0.0898	0.128	0.00549	-0.223	TRUE	FALSE	FALSE	TRUE
Q640M6	Gdpd5	7.54059	7.53334	7.57201	7.5459	7.38407	7.46162	7.00944	7.40321	7.24237	6.94422	7.24633	7.01771	7.2823	7.34239	7.30642	7.20631	FALSE	0	0.000237796	0.00146	-0.435	0.0747255	0.182	0.172	0.0103773	0.0856	-0.264	-0.000303	0.233	-0.0305	-0.202	TRUE	FALSE	FALSE	TRUE
Q63959	Kcnc3	7.41829	7.7282	7.69841	7.56764	7.7525	7.4005	7.64265	7.49688	7.36772	7.30469	7.29339	7.38154	7.44413	7.49343	7.60176	7.63018	FALSE	0	0.00454413	0.015	-0.266	0.0208731	0.0711	0.206	0.454851	0.689	-0.0608	0.0593	0.0893	0.0285	-0.177	TRUE	FALSE	FALSE	TRUE
Q63739	Ptp4a1	8.20077	8.24354	7.84766	8.04492	8.01642	7.8684	8.08795	8.05627	7.74869	7.86849	7.82609	7.76571	7.83388	7.86567	7.97283	7.85424	FALSE	0	0.00214526	0.00824	-0.282	0.30933	0.487	0.0794	0.0174869	0.113	-0.203	0.0634	0.14	-0.0622	-0.142	TRUE	FALSE	FALSE	TRUE
Q62422	Ostf1	9.25594	9.04512	9.03287	9.16743	9.06438	9.16216	9.3587	9.02618	9.47882	9.36182	9.45274	9.42905	9.23842	9.41494	9.22603	9.30579	FALSE	0	0.000772034	0.00365	0.305	0.0814839	0.193	-0.134	0.0314659	0.154	0.171	-0.0984	-0.126	0.045	0.179	TRUE	FALSE	FALSE	TRUE
Q62418	Dbnl	9.96142	10.0339	9.95352	10.009	9.96312	9.87403	9.75544	9.89581	9.65285	9.67311	9.72184	9.70357	9.8433	9.81364	9.96197	9.85726	FALSE	0	9.37e-06	0.000112	-0.302	0.00120616	0.00782	0.181	0.0177634	0.114	-0.12	0.0175	0.135	0.0144	-0.167	TRUE	FALSE	FALSE	TRUE
Q62351	Tfrc	9.62645	9.77381	9.80742	9.76225	9.9128	9.74516	9.79528	9.82914	9.33586	9.48152	9.35931	9.38127	9.64568	9.57429	9.6477	9.62304	FALSE	0	3.23e-06	4.92e-05	-0.353	0.000236588	0.00223	0.233	0.0249593	0.135	-0.12	0.177	0.0987	-0.0211	-0.254	TRUE	FALSE	FALSE	TRUE
Q62288	Spock1	7.75616	7.8923	7.89645	7.95246	7.68398	8.1603	7.55759	7.73866	7.5558	7.28612	7.74867	7.59486	7.83369	7.71817	7.96741	7.78392	FALSE	0	0.013817	0.0369	-0.328	0.0310976	0.095	0.279	0.683768	0.849	-0.0485	0.0272	0.116	0.0679	-0.212	TRUE	FALSE	FALSE	TRUE
Q62277	Syp	13.0241	13.3636	13.1509	13.0119	13.2977	12.9418	13.2692	13.2442	12.7976	12.8303	12.6971	12.8744	12.9533	12.9286	12.9943	13.0554	FALSE	0	0.0013422	0.00571	-0.338	0.0486138	0.132	0.183	0.0894647	0.281	-0.155	0.161	0.11	-0.0442	-0.227	TRUE	FALSE	FALSE	TRUE
Q62189	Snrpa	7.96182	7.97494	7.75587	7.93429	7.59025	7.81156	7.61206	7.76756	7.60111	7.50286	7.51192	7.5921	7.6893	7.61512	7.71981	7.66052	FALSE	0	2.79e-05	0.000264	-0.355	0.0606805	0.156	0.119	0.00122396	0.0298	-0.236	-0.011	0.2	-0.0351	-0.154	TRUE	FALSE	FALSE	TRUE
Q61768	Kif5b	10.0265	9.9549	9.91677	9.93555	9.89452	9.93524	9.99432	9.94656	10.2461	10.2657	10.2428	10.1884	9.99656	10.0944	10.0555	10.1113	FALSE	0	2.38e-06	3.9e-05	0.277	0.000340665	0.00297	-0.171	0.0115493	0.0904	0.106	-0.108	-0.0919	0.0141	0.185	TRUE	FALSE	FALSE	TRUE
Q61738	Itga7	7.02794	6.85192	7.12791	6.86127	7.05029	6.96451	7.01641	7.1499	7.34944	7.51852	7.38014	7.51177	7.09004	7.3537	7.1335	7.31823	FALSE	0	2.07e-05	0.000207	0.473	0.0126544	0.0488	-0.216	0.00435894	0.0534	0.257	-0.124	-0.202	0.0548	0.271	TRUE	FALSE	FALSE	TRUE
Q61730	Il1rap	7.09551	7.28852	7.1353	7.19494	7.10571	7.16535	6.95713	7.15883	7.34871	7.58556	7.50231	7.69012	7.37017	7.36555	7.15512	7.21358	FALSE	0	0.000354316	0.00198	0.353	0.0044529	0.0219	-0.256	0.218008	0.467	0.0975	-0.174	-0.0922	0.00533	0.261	TRUE	FALSE	FALSE	TRUE
Q61702	Itih1	8.57302	8.37253	8.1703	8.30032	8.29652	8.39207	8.29007	8.24485	8.68947	8.92397	8.55331	8.60676	8.33344	8.65157	8.69009	8.62842	FALSE	0	0.00378083	0.013	0.339	0.250596	0.425	-0.117	0.0399711	0.177	0.222	-0.176	-0.128	0.0936	0.211	TRUE	FALSE	FALSE	TRUE
Q61699	Hsph1	12.6763	12.6483	12.5196	12.6414	12.4792	12.5865	12.5417	12.5905	12.3499	12.3684	12.3204	12.3258	12.5126	12.4618	12.6154	12.5165	FALSE	0	1.16e-05	0.000131	-0.28	0.000641886	0.00482	0.185	0.0424912	0.185	-0.0948	0.0398	0.112	0.0169	-0.169	TRUE	FALSE	FALSE	TRUE
Q61545	Ewsr1	10.794	10.6721	10.6964	10.6397	10.6581	10.7881	10.6849	10.7285	10.321	10.3438	10.4798	10.5046	10.5916	10.5877	10.6232	10.6196	FALSE	0	3.03e-05	0.000281	-0.288	0.00120745	0.00783	0.193	0.0669235	0.24	-0.095	0.107	0.0922	-0.00282	-0.196	TRUE	FALSE	FALSE	TRUE
Q61387	Cox7a2l	8.19902	7.98583	7.69377	7.81675	7.83331	7.95066	8.06035	7.93584	7.70556	7.24381	7.47864	7.57967	7.4124	7.79494	7.87621	8.06801	FALSE	0	0.00790516	0.0235	-0.422	0.0546767	0.145	0.286	0.336044	0.585	-0.136	0.155	0.134	-0.00178	-0.288	TRUE	FALSE	FALSE	TRUE
Q61301	Ctnna2	11.6425	11.5742	11.5744	11.5636	11.5233	11.5962	11.5692	11.6105	11.2797	11.2635	11.2902	11.3093	11.5133	11.5222	11.5514	11.587	FALSE	0	1.24e-07	4.12e-06	-0.303	8.77e-07	3.11e-05	0.258	0.169463	0.402	-0.0452	0.0767	0.0905	0.0453	-0.212	TRUE	FALSE	FALSE	TRUE
Q61292	Lamb2	8.19561	8.29207	8.253	8.27004	8.33732	8.31472	8.17561	8.34194	8.53038	8.60474	8.42251	8.6296	8.28132	8.3386	8.26901	8.35039	FALSE	0	3.48e-05	0.000314	0.294	0.000283689	0.00258	-0.237	0.267708	0.515	0.0571	-0.058	-0.0977	-0.0406	0.196	TRUE	FALSE	FALSE	TRUE
Q61290	Cacna1e	10.7036	10.6917	10.6628	10.7383	10.6861	10.7469	10.7376	10.7128	10.3514	10.3751	10.3228	10.4097	10.6313	10.566	10.6992	10.5654	FALSE	0	1.98e-07	5.77e-06	-0.334	5.85e-06	0.000134	0.251	0.0346068	0.163	-0.0836	0.121	0.0991	0.0154	-0.235	TRUE	FALSE	FALSE	TRUE
Q61282	Acan	8.81562	8.8616	8.91207	8.95241	8.96084	8.88049	9.01766	8.80084	9.30756	9.12784	9.18941	9.27107	9.14118	9.1189	9.15382	9.07011	FALSE	0	1.28e-05	0.000143	0.339	0.06677	0.167	-0.103	0.000448465	0.0183	0.236	-0.121	-0.151	0.0847	0.188	TRUE	FALSE	FALSE	TRUE
Q61210	Arhgef1	8.06602	8.13456	8.18104	7.91606	8.30056	8.09099	8.28274	8.15768	8.36438	8.48289	8.26895	8.34118	8.13127	8.14961	8.0212	8.28562	FALSE	0	0.00115348	0.00505	0.29	0.00868656	0.0365	-0.217	0.327215	0.575	0.0725	0.00957	-0.124	-0.0515	0.166	TRUE	FALSE	FALSE	TRUE
Q61166	Mapre1	11.4711	11.6863	11.6385	11.5573	11.6778	11.638	11.5841	11.5762	11.8895	11.9884	11.9123	11.8925	11.7407	11.6899	11.8078	11.7901	FALSE	0	5.73e-06	7.66e-05	0.332	0.00381378	0.0195	-0.164	0.00305587	0.0459	0.169	-0.102	-0.133	0.0358	0.199	TRUE	FALSE	FALSE	TRUE
Q61133	Gstt2	7.53744	6.94002	6.92023	6.84825	6.9501	7.04735	7.44973	7.08218	7.49054	7.51214	7.32348	7.48211	7.18263	7.29294	7.37998	7.16311	FALSE	0	0.0119318	0.0327	0.391	0.166857	0.32	-0.197	0.175516	0.409	0.193	-0.0928	-0.164	0.0295	0.227	TRUE	FALSE	FALSE	TRUE
Q61056	Trpc1	6.9396	6.85182	6.81162	6.55131	6.61805	6.83994	6.81902	6.70727	5.98399	6.50194	6.4318	6.63505	6.51969	6.5084	6.49092	6.54161	FALSE	0	0.00352794	0.0123	-0.4	0.286292	0.465	0.127	0.0315233	0.154	-0.273	0.137	0.179	-0.0943	-0.221	TRUE	FALSE	FALSE	TRUE
Q60996	Ppp2r5c	11.3977	11.3462	11.3358	11.3171	11.2938	11.2206	11.2082	11.2935	11.0128	11.1121	10.9812	10.9573	11.1543	11.0977	11.2517	11.114	FALSE	0	1.99e-06	3.41e-05	-0.333	0.00630281	0.0286	0.139	0.0004863	0.0188	-0.195	0.0606	0.156	-0.0389	-0.178	TRUE	FALSE	FALSE	TRUE
Q60963	Pla2g7	7.76557	7.77384	7.62193	7.82961	7.69798	7.64049	7.73194	7.84806	8.12923	8.27224	8.02224	8.1994	7.83357	7.96693	8.06628	7.90819	FALSE	0	2.4e-05	0.000235	0.408	0.00637686	0.0288	-0.212	0.0103249	0.0852	0.196	-0.165	-0.146	0.0495	0.262	TRUE	FALSE	FALSE	TRUE
Q60936	Coq8a	10.2473	10.1451	9.99085	10.0593	10.0796	10.1178	10.1713	10.1486	9.77551	9.80032	9.79921	9.84385	9.94379	9.90684	10.0058	9.87641	FALSE	0	2.1e-05	0.000209	-0.306	0.0201263	0.0691	0.128	0.0027747	0.0439	-0.177	0.135	0.116	-0.0613	-0.19	TRUE	FALSE	FALSE	TRUE
Q60771	Cldn11	9.58454	10.1279	10.0229	9.75159	10.1871	9.71057	9.92655	10.0865	10.5174	10.4194	10.4561	10.4218	10.1883	10.2528	10.2579	10.3014	FALSE	0	0.000111676	0.000803	0.582	0.0854803	0.2	-0.204	0.00396307	0.0504	0.378	-0.161	-0.267	0.112	0.315	TRUE	FALSE	FALSE	TRUE
Q60715	P4ha1	7.18487	6.95404	7.2355	7.11855	7.11268	7.09538	7.53075	7.23501	7.3677	7.59894	7.16845	7.49259	7.19491	7.1339	7.21952	7.01971	FALSE	0	0.0165577	0.0426	0.284	0.0235348	0.0776	-0.265	0.859856	0.944	0.0188	0.0145	-0.106	-0.0869	0.178	TRUE	FALSE	FALSE	TRUE
Q60598	Cttn	12.8517	12.9474	12.8693	12.913	12.8303	13.0502	12.9604	12.9874	12.6174	12.5779	12.6076	12.5509	12.9306	12.6953	12.9037	12.7774	FALSE	0	6.43e-05	0.000515	-0.307	0.000663764	0.00495	0.238	0.231575	0.479	-0.0686	0.14	0.0785	0.00983	-0.228	TRUE	FALSE	FALSE	TRUE
Q5Y5T1	Zdhhc20	6.27263	6.30491	5.50483	6.40951	5.03733	5.79977	4.76431	4.94296	5.26213	5.21836	5.83637	5.10872	5.33888	5.38465	5.37224	5.48906	TRUE	2	0.0048492	0.0158	-0.767	0.864928	0.923	0.0398	0.00685367	0.0685	-0.727	-0.367	0.62	-0.107	-0.147	TRUE	FALSE	FALSE	TRUE
Q5U5M8	Bloc1s3	6.07084	6.63907	6.74137	6.47727	6.40686	6.47289	6.43995	6.73027	6.70568	7.22341	6.99621	7.21618	6.92914	6.70594	6.4114	7.20508	FALSE	0	0.0067186	0.0206	0.553	0.222626	0.393	-0.222	0.0785191	0.262	0.331	-0.198	-0.229	0.102	0.325	TRUE	FALSE	FALSE	TRUE
Q5U4C9	Dyrk2	6.52681	6.50946	6.32677	6.14099	6.3544	6.30689	6.24432	6.3485	6.01317	6.1202	6.17994	5.63151	6.21616	6.28242	6.17934	6.141	FALSE	0	0.00234183	0.0088	-0.39	0.0567789	0.149	0.219	0.126044	0.339	-0.171	0.0934	0.156	-0.0154	-0.234	TRUE	FALSE	FALSE	TRUE
Q5SSK3	Tefm	7.86959	7.44131	7.57385	8.22541	7.39787	7.82658	7.55389	7.59058	7.58556	7.12583	7.38518	7.37392	7.38324	7.57006	7.32631	7.21075	TRUE	3	0.0167933	0.0431	-0.41	0.974235	0.985	0.00497	0.0179132	0.115	-0.405	0.0647	0.25	-0.155	-0.16	TRUE	FALSE	FALSE	TRUE
Q5SS00	Zdbf2	12.975	11.9463	13.3617	12.5823	13.0895	12.7852	13.0853	12.5893	13.482	13.181	13.2118	13.456	12.9451	13.2958	13.005	13.2352	FALSE	0	0.016498	0.0425	0.616	0.364331	0.545	-0.212	0.0961978	0.292	0.404	-0.127	-0.298	0.106	0.319	TRUE	FALSE	FALSE	TRUE
Q5RJI5	Brsk1	9.78735	9.92826	9.77513	9.90537	9.73795	9.77681	9.74921	9.72143	9.55967	9.49944	9.57942	9.64338	9.74736	9.76211	9.84865	9.78946	FALSE	0	1.3e-05	0.000144	-0.279	0.000168147	0.00173	0.216	0.16787	0.4	-0.0621	0.00816	0.111	0.0487	-0.168	TRUE	FALSE	FALSE	TRUE
Q5RJF7	Cacna2d4	6.73559	6.36653	6.52045	6.77522	6.17858	6.45146	6.58199	5.65238	5.79889	5.54915	5.79532	5.99099	5.89945	6.10871	6.13848	6.22519	FALSE	0	0.000235444	0.00145	-0.816	0.0850683	0.199	0.309	0.00889325	0.0793	-0.506	0.0431	0.426	-0.0801	-0.389	TRUE	FALSE	FALSE	TRUE
Q5PR73	Diras2	13.122	13.179	13.3029	13.2111	13.2874	13.1853	13.232	13.238	13.0039	12.921	12.8979	12.9058	13.1812	13.1848	13.127	13.091	FALSE	0	1.51e-05	0.000162	-0.272	0.000168064	0.00173	0.214	0.19308	0.435	-0.0577	0.106	0.0743	0.0166	-0.197	TRUE	FALSE	FALSE	TRUE
Q5M956	Kctd1	7.14524	7.31689	7.10391	7.45454	7.22698	6.5694	7.11406	7.00502	6.61773	6.7578	6.7931	7.09243	7.17696	6.676	6.70421	6.87321	TRUE	1	0.0100515	0.0286	-0.44	0.779172	0.873	0.0423	0.0176837	0.114	-0.398	0.00215	0.278	-0.119	-0.161	TRUE	FALSE	FALSE	TRUE
Q5M8N0	Cnrip1	11.9645	11.8462	11.6842	11.9638	11.7038	11.7942	11.5934	11.745	11.3934	11.3781	11.5564	11.4624	11.6655	11.6425	11.9029	11.5641	FALSE	0	0.000103187	0.000753	-0.417	0.0070927	0.0311	0.246	0.0463229	0.195	-0.171	0.0303	0.186	0.015	-0.231	TRUE	FALSE	FALSE	TRUE
Q5HZI9	Slc25a51	9.42701	9.55103	9.54374	9.50921	9.39315	9.48161	9.19875	9.53279	9.2141	9.10203	9.09037	9.07963	9.24237	9.24978	9.36311	9.30917	FALSE	0	2.32e-05	0.000229	-0.386	0.0167598	0.06	0.17	0.00375089	0.0498	-0.217	0.0711	0.177	-0.0394	-0.209	TRUE	FALSE	FALSE	TRUE
Q5F285	Tmem256	9.66879	9.76192	10.3137	9.92149	10.4146	10.2083	10.5917	10.4259	10.442	10.5715	10.38	10.6433	10.2369	10.4938	10.1452	10.3858	FALSE	0	0.000324225	0.00185	0.593	0.145372	0.291	-0.194	0.00670936	0.0673	0.399	0.122	-0.371	0.0276	0.221	TRUE	FALSE	FALSE	TRUE
Q5DTT2	Psd	9.2195	9.14635	9.24118	9.25283	9.3237	9.19823	9.33154	9.26874	8.87452	8.91874	8.92901	8.97141	9.04886	9.09625	9.05467	9.12681	FALSE	0	2.39e-06	3.91e-05	-0.292	0.0010289	0.00695	0.158	0.00371863	0.0497	-0.133	0.155	0.0898	-0.0435	-0.202	TRUE	FALSE	FALSE	TRUE
Q571F8	Gls2	7.93602	7.80532	7.80476	7.41693	7.84558	7.69437	7.73091	7.73457	6.94245	7.38945	6.76738	7.43159	7.49658	7.46616	7.72106	7.34187	FALSE	0	0.000793735	0.00374	-0.608	0.0203891	0.0697	0.374	0.123564	0.336	-0.234	0.219	0.208	-0.0264	-0.4	TRUE	FALSE	FALSE	TRUE
Q4VGL6	Rc3h1	5.90554	6.01772	5.89461	5.77945	6.0453	5.96769	6.14643	6.1235	5.64368	5.26817	5.28974	5.48128	5.28551	5.66773	5.65331	5.79543	FALSE	0	0.000376871	0.00208	-0.479	0.103397	0.229	0.18	0.0116882	0.0907	-0.299	0.323	0.152	-0.147	-0.327	TRUE	FALSE	FALSE	TRUE
Q4KUS2	Unc13a	10.6571	10.8079	10.739	10.6693	10.771	10.7097	10.7163	10.8036	10.3782	10.447	10.3489	10.4269	10.668	10.5778	10.6426	10.6489	FALSE	0	1.53e-06	2.77e-05	-0.318	4.43e-05	0.000615	0.234	0.0559917	0.218	-0.084	0.124	0.0926	0.00856	-0.225	TRUE	FALSE	FALSE	TRUE
Q3V038	Ttc9	7.44786	7.19277	7.28361	7.36505	7.28039	7.01292	7.12467	6.99974	6.9664	6.88535	7.05118	7.21244	7.1452	7.15672	7.22628	7.09227	FALSE	0	0.00194561	0.00762	-0.293	0.124694	0.26	0.126	0.0483031	0.2	-0.167	-0.0482	0.17	0.00244	-0.124	TRUE	FALSE	FALSE	TRUE
Q3UZV7	Elapor2	6.10181	5.77998	6.17514	6.01573	6.76761	6.40017	6.30596	6.61866	6.28592	6.51972	6.94185	6.26676	6.54686	6.54767	6.25756	6.69437	FALSE	0	0.00576025	0.0182	0.485	0.957772	0.976	0.00805	0.00517229	0.0583	0.493	0.134	-0.371	0.123	0.114	TRUE	FALSE	FALSE	TRUE
Q3UXZ9	Kdm5a	7.00277	6.69529	7.1563	6.82207	7.06322	6.82501	7.13608	7.04952	7.18432	7.23714	7.46324	7.27149	7.11343	7.25637	7.05848	7.1281	TRUE	6	0.00164434	0.00668	0.37	0.13803	0.281	-0.15	0.0367405	0.168	0.22	-0.073	-0.172	0.0477	0.198	TRUE	FALSE	FALSE	TRUE
Q3UVX5	Grm5	10.4648	10.5419	10.4821	10.4832	10.4359	10.4601	10.4112	10.4204	10.0392	10.172	10.0513	10.0233	10.2688	10.1666	10.3409	10.3307	FALSE	0	1.15e-07	3.91e-06	-0.422	0.00029773	0.00268	0.205	0.000184898	0.012	-0.216	0.114	0.175	-0.0415	-0.247	TRUE	FALSE	FALSE	TRUE
Q3UVC0	Ksr2	8.62383	8.61379	8.55284	8.52521	8.62389	8.49694	8.62481	8.51436	8.38942	8.23777	8.24385	8.27009	8.38198	8.51029	8.45517	8.35232	FALSE	0	2.78e-05	0.000264	-0.294	0.0118534	0.0464	0.14	0.00657662	0.0668	-0.154	0.101	0.115	-0.0386	-0.178	TRUE	FALSE	FALSE	TRUE
Q3URU2	Peg3	8.05962	8.21054	8.25456	8.01766	8.27283	7.78488	8.22418	7.68365	7.93402	7.67135	7.70544	7.88594	8.03208	8.02408	7.76917	7.8827	FALSE	0	0.0155638	0.0405	-0.336	0.313764	0.492	0.128	0.110138	0.314	-0.209	0.0281	0.172	-0.0363	-0.164	TRUE	FALSE	FALSE	TRUE
Q3URE9	Lingo2	7.58036	7.56814	7.81455	7.67397	7.71016	7.6809	7.40667	7.67563	7.47056	7.29579	7.53521	7.26097	7.41049	7.38432	7.51793	7.46122	FALSE	0	0.00436065	0.0145	-0.269	0.515648	0.681	0.0529	0.0164235	0.11	-0.216	0.0904	0.131	-0.0844	-0.137	TRUE	FALSE	FALSE	TRUE
Q3UN02	Lclat1	7.23782	7.32731	6.94048	6.93522	6.87932	6.86447	6.67602	7.13881	6.89785	6.75164	6.84123	6.74815	6.75549	6.92957	6.88669	6.80023	FALSE	0	0.00920825	0.0266	-0.3	0.743403	0.848	0.0333	0.0178221	0.114	-0.267	-0.0235	0.197	-0.0701	-0.103	TRUE	FALSE	FALSE	TRUE
Q3UMG5	Lrch2	7.73806	7.42051	7.54236	7.60374	7.63464	7.42491	7.82828	7.57523	7.3317	7.34471	6.93344	6.90319	7.21212	7.41503	7.39418	7.65758	FALSE	0	0.00264108	0.00972	-0.448	0.0326264	0.0984	0.291	0.224142	0.473	-0.156	0.181	0.141	-0.0153	-0.307	TRUE	FALSE	FALSE	TRUE
Q3UIL6	Plekha7	5.36324	5.19835	4.99789	5.12592	5.35512	5.24632	5.38215	5.12186	5.28237	5.65745	5.66053	5.67384	5.1248	5.14744	5.33226	5.63049	FALSE	0	0.00481587	0.0157	0.397	0.0463039	0.128	-0.26	0.267253	0.515	0.137	-0.0549	-0.16	-0.0225	0.237	TRUE	FALSE	FALSE	TRUE
Q3UHX2	Pdap1	8.93195	9.56147	8.05418	8.95164	7.98858	8.61556	8.08633	8.49207	7.93438	7.93403	7.64735	7.66101	7.86274	7.92408	8.49474	8.2359	FALSE	0	0.000718852	0.00345	-1.08	0.203386	0.37	0.335	0.010126	0.0844	-0.745	0.0221	0.601	-0.144	-0.479	TRUE	FALSE	FALSE	TRUE
Q3UHL1	Camkv	13.3047	13.2641	13.2809	13.2211	13.2407	13.0313	13.1638	13.1026	12.9506	12.9349	12.9673	12.9058	13.1495	13.0916	13.1698	13.1563	FALSE	0	1.35e-06	2.49e-05	-0.328	0.000223914	0.00214	0.202	0.00843503	0.0774	-0.126	0.0136	0.147	0.0209	-0.181	TRUE	FALSE	FALSE	TRUE
Q3UHI4	Tmed8	9.85452	9.72294	9.24251	9.55497	8.82567	9.24937	9.14498	9.36871	8.96846	9.03894	9.09884	8.61842	9.2642	9.0992	9.10343	9.12993	FALSE	0	0.000289457	0.0017	-0.663	0.138323	0.281	0.218	0.00631868	0.0658	-0.445	-0.0581	0.388	-0.0561	-0.274	TRUE	FALSE	FALSE	TRUE
Q3UHD9	Agap2	10.8118	10.8736	10.7314	10.829	10.6828	10.8907	10.8819	10.9348	10.4762	10.4931	10.419	10.4615	10.6893	10.6585	10.7501	10.7538	FALSE	0	7.2e-06	9.14e-05	-0.349	0.000212392	0.00207	0.25	0.0723142	0.25	-0.0985	0.139	0.103	0.00433	-0.246	TRUE	FALSE	FALSE	TRUE
Q3UHD3	Mtus2	7.08321	6.99189	6.98036	7.09771	7.0722	7.08449	7.15372	7.00281	6.57459	6.63536	6.75811	6.66199	6.84506	6.82006	6.93625	6.94282	FALSE	0	1.61e-06	2.86e-05	-0.381	0.00032669	0.00289	0.229	0.0071957	0.0701	-0.152	0.163	0.123	-0.029	-0.258	TRUE	FALSE	FALSE	TRUE
Q3UHD1	Adgrb1	8.74058	8.74319	8.73328	8.72946	8.70396	8.68051	8.78398	8.55445	8.35927	8.39498	8.31123	8.47346	8.56147	8.4309	8.49062	8.55647	FALSE	0	4.32e-06	6.26e-05	-0.352	0.0225066	0.0751	0.125	0.000372578	0.017	-0.227	0.103	0.159	-0.0681	-0.193	TRUE	FALSE	FALSE	TRUE
Q3UGX3	Nat8l	8.22486	8.03565	8.1943	7.7045	8.05978	7.79886	8.00247	8.01358	7.81539	7.61914	7.69112	7.71249	7.93831	7.77776	7.79654	8.08096	FALSE	0	0.00663705	0.0204	-0.33	0.0904296	0.208	0.189	0.194805	0.436	-0.141	0.0646	0.136	-0.00572	-0.195	TRUE	FALSE	FALSE	TRUE
Q3UD01	Atxn7l3b	5.89427	6.18429	5.65245	6.17288	5.55427	5.57624	5.76155	5.45304	5.41853	5.09293	5.3263	5.15158	5.00875	5.5142	5.22317	5.99778	TRUE	6	0.000985634	0.00446	-0.729	0.301934	0.479	0.189	0.00828791	0.0763	-0.54	0.0249	0.415	-0.125	-0.314	TRUE	FALSE	FALSE	TRUE
Q3U7R1	Esyt1	9.75298	9.57047	9.76035	9.69382	9.74508	9.84419	9.94785	9.79435	10.1147	10.0951	10.0673	10.0958	9.84257	9.91179	9.8048	9.83493	FALSE	0	1.04e-06	2.02e-05	0.399	0.000189201	0.00189	-0.245	0.00703346	0.0693	0.154	-0.0344	-0.173	-0.0187	0.226	TRUE	FALSE	FALSE	TRUE
Q3U1C6	Tatdn3	10.5492	10.2221	10.3113	10.2428	10.2456	10.3042	10.5179	10.2554	9.98249	10.1189	9.96638	10.1076	10.1388	10.3011	10.034	10.1394	FALSE	0	0.00325823	0.0115	-0.288	0.19951	0.364	0.109	0.0458985	0.193	-0.178	0.116	0.117	-0.0615	-0.171	TRUE	FALSE	FALSE	TRUE
Q3U0V2	Tradd	7.20158	7.32348	7.2207	7.35423	7.80138	7.79454	8.06925	7.32694	7.9496	8.16414	7.53899	8.06145	7.155	7.38685	7.65675	7.76476	FALSE	0	0.00139359	0.00587	0.654	0.0187756	0.0654	-0.438	0.211548	0.457	0.216	0.137	-0.336	-0.12	0.318	TRUE	FALSE	FALSE	TRUE
Q3U0B3	Dhrs11	7.37918	7.28852	7.10087	7.21331	7.18176	7.36921	7.36836	7.27154	7.70936	7.41048	7.59514	7.45335	7.41473	7.35317	7.58842	7.62188	FALSE	0	0.00266015	0.00977	0.297	0.569247	0.722	-0.0475	0.00851177	0.0778	0.249	-0.0972	-0.149	0.0996	0.147	TRUE	FALSE	FALSE	TRUE
Q3TZX8	Nol9	6.8484	6.65581	6.60099	6.8259	6.49606	6.79863	6.51853	6.52943	6.42031	6.36809	6.56528	6.25595	6.60924	6.49473	6.68643	6.68517	FALSE	0	0.00135527	0.00574	-0.33	0.0206245	0.0703	0.216	0.19183	0.434	-0.114	0.000728	0.148	0.034	-0.183	TRUE	FALSE	FALSE	TRUE
Q3TZX3	Slc25a33	8.12868	7.79888	7.63905	7.84499	7.28281	7.54081	7.44847	7.67271	7.238	7.40278	7.24099	7.41065	7.59988	7.4511	7.89679	7.28512	FALSE	0	0.000880606	0.00408	-0.53	0.0835105	0.197	0.235	0.0348691	0.164	-0.295	-0.0689	0.298	0.00311	-0.232	TRUE	FALSE	FALSE	TRUE
Q3TYD6	Lmtk2	8.27265	8.20534	8.21266	8.13348	8.22316	8.03453	8.15056	8.12141	7.92822	7.87725	7.85505	7.91323	8.12613	8.06133	7.98605	8.12683	FALSE	0	8.01e-06	9.97e-05	-0.313	0.00140144	0.00888	0.182	0.012644	0.094	-0.131	0.0557	0.129	-0.00166	-0.183	TRUE	FALSE	FALSE	TRUE
Q3TXU5	Dhps	7.35275	7.56997	6.65489	7.09933	7.16036	6.89687	7.15258	7.07503	6.44979	6.72093	6.75322	6.34147	6.70523	6.44927	6.53223	6.97524	FALSE	0	0.00307112	0.011	-0.603	0.56704	0.721	0.0991	0.0098909	0.0834	-0.504	0.203	0.301	-0.203	-0.302	TRUE	FALSE	FALSE	TRUE
Q3TWI9	Tmem63b	7.21016	7.58638	6.59519	7.38059	7.02706	7.12672	6.82853	7.12792	6.773	6.89494	6.42104	6.22926	6.68537	6.67365	7.24409	6.80867	FALSE	0	0.00808884	0.024	-0.614	0.191418	0.354	0.273	0.10967	0.313	-0.34	0.114	0.28	-0.0603	-0.334	TRUE	FALSE	FALSE	TRUE
Q3TTA7	Cblb	8.19793	8.10511	7.93781	7.91748	7.91363	7.94095	8.08956	8.0156	7.62644	7.64872	7.61514	7.75588	7.81588	7.931	7.90902	7.86944	FALSE	0	2.6e-05	0.00025	-0.378	0.00315545	0.0168	0.22	0.0227025	0.129	-0.158	0.0968	0.146	-0.0118	-0.232	TRUE	FALSE	FALSE	TRUE
Q3TRR0	Map9	6.92752	7.12276	6.96598	7.1938	7.31428	7.09364	7.21135	7.07671	6.73273	6.74227	6.59855	6.77965	7.02847	6.67625	6.93192	6.89727	FALSE	0	0.000887257	0.00411	-0.339	0.0538454	0.143	0.17	0.0552643	0.216	-0.169	0.218	0.0967	-0.0723	-0.243	TRUE	FALSE	FALSE	TRUE
Q3TNH5	Fam172a	7.81148	7.5983	7.50202	7.86592	7.76874	7.6859	7.83701	7.63877	7.92074	8.02522	8.05251	7.93743	7.71976	7.87348	7.70743	7.67255	FALSE	0	0.00190328	0.00748	0.29	0.00685036	0.0303	-0.241	0.530981	0.746	0.0489	-0.056	-0.0941	-0.0453	0.195	TRUE	FALSE	FALSE	TRUE
Q3TMP8	Tmem38a	7.92838	7.83585	8.13755	8.12542	8.09197	8.03178	8.04727	8.01254	7.76825	7.47902	7.6168	7.81348	8.09907	8.15072	7.88343	7.60114	FALSE	0	0.0082744	0.0244	-0.337	0.0305956	0.0939	0.264	0.516351	0.734	-0.0732	0.132	0.0929	0.0197	-0.245	TRUE	FALSE	FALSE	TRUE
Q3TJD7	Pdlim7	7.31441	7.23709	7.25808	7.21372	7.55149	7.62942	7.61907	7.3843	7.71741	7.31993	7.38434	7.67126	7.34407	7.59773	7.58959	7.52369	FALSE	0	0.00899602	0.0261	0.267	0.91622	0.952	-0.00946	0.0111301	0.0887	0.258	0.0863	-0.204	0.054	0.0635	TRUE	FALSE	FALSE	TRUE
Q3TDX8	Cyb5r4	6.93655	6.81957	6.89681	6.68008	6.55464	6.76708	6.91007	7.0688	6.5566	6.67483	6.26467	6.48087	6.63535	6.41014	6.48897	6.57886	FALSE	0	0.00622813	0.0193	-0.339	0.751593	0.854	0.0341	0.0118426	0.0913	-0.305	0.155	0.163	-0.142	-0.176	TRUE	FALSE	FALSE	TRUE
Q3TC93	Hs1bp3	7.77159	7.99236	7.81807	7.81955	7.86712	8.0004	7.76413	8.03383	8.29017	8.31858	8.17902	8.14553	7.91121	7.82733	8.07011	8.13076	FALSE	0	0.000209976	0.00134	0.383	0.00625287	0.0284	-0.248	0.10428	0.305	0.134	-0.0799	-0.146	-0.0114	0.237	TRUE	FALSE	FALSE	TRUE
Q3TBL6	Tnfaip8l3	8.73011	8.93211	8.83506	8.72979	8.89929	8.73258	8.83013	8.4905	8.56219	8.56424	8.54518	8.47617	8.72313	8.74518	8.63591	8.96708	FALSE	0	0.00663054	0.0204	-0.27	0.0164822	0.0594	0.231	0.653355	0.83	-0.0389	0.0257	0.0944	0.0554	-0.175	TRUE	FALSE	FALSE	TRUE
Q3TAS6	Emc10	7.73969	7.68916	7.75007	7.67935	7.65124	7.39363	7.83046	7.57912	7.31486	7.52509	7.2066	7.02045	7.60677	7.35792	7.44547	7.53381	FALSE	0	0.000526561	0.00269	-0.448	0.0463058	0.128	0.219	0.0388647	0.174	-0.229	0.0934	0.194	-0.0342	-0.253	TRUE	FALSE	FALSE	TRUE
Q3KNJ2	Nhej1	5.77541	5.57829	6.04547	5.33558	6.13473	5.78434	6.16472	5.93481	6.44344	6.5077	5.51202	6.60895	5.93816	5.87281	5.64612	6.22555	TRUE	4	0.0173424	0.0442	0.584	0.131357	0.271	-0.347	0.292842	0.541	0.237	0.0354	-0.286	-0.0486	0.299	TRUE	FALSE	FALSE	TRUE
Q31125	Slc39a7	8.49192	8.51297	8.38513	8.04413	8.29387	8.32842	8.1781	8.38667	8.69066	8.56398	8.6112	8.63751	8.57722	8.44106	8.63444	8.64276	FALSE	0	0.00815946	0.0242	0.267	0.559421	0.717	-0.052	0.0264847	0.139	0.215	-0.167	-0.105	0.11	0.162	TRUE	FALSE	FALSE	TRUE
Q2PFD7	Psd3	11.4291	11.3042	11.3584	11.3574	11.3566	11.3665	11.3417	11.1929	11.0849	10.9907	11.1382	11.0798	11.3175	11.2908	11.3569	11.3392	FALSE	0	1.4e-05	0.000153	-0.289	5.65e-05	0.00074	0.253	0.4307	0.665	-0.0362	0.0454	0.0932	0.057	-0.196	TRUE	FALSE	FALSE	TRUE
Q1HKZ5	Map3k13	7.09429	7.30465	6.84161	6.30598	6.35801	6.4746	6.46137	6.37546	5.80822	6.09749	6.80406	5.61391	6.5992	6.10276	5.93614	6.22241	FALSE	0	0.00472461	0.0155	-0.806	0.585722	0.734	0.134	0.014339	0.101	-0.672	0.0174	0.487	-0.185	-0.319	TRUE	FALSE	FALSE	TRUE
Q14DH7	Acss3	7.33735	6.6804	6.48723	6.51364	6.84064	6.83973	7.54303	7.75481	7.71816	7.83648	7.47268	7.42341	6.93148	7.45042	7.3226	7.16988	TRUE	1	0.00187758	0.00741	0.858	0.101672	0.226	-0.394	0.0582077	0.223	0.464	0.0369	-0.453	0.011	0.405	TRUE	FALSE	FALSE	TRUE
Q14BI2	Grm2	11.955	12.1498	12.273	12.1601	12.226	12.1187	11.9257	12.1614	11.8261	11.7553	11.9058	11.9875	12.028	11.8995	11.9757	11.7661	FALSE	0	0.00547254	0.0174	-0.266	0.558109	0.716	0.0487	0.0180028	0.115	-0.217	0.101	0.127	-0.0898	-0.138	TRUE	FALSE	FALSE	TRUE
Q0VDN7	Rundc1	8.14187	7.87079	7.81622	7.5376	7.79954	7.74433	8.13052	7.95547	7.6285	7.64014	7.40625	7.46855	7.47943	7.69913	7.58649	7.75349	FALSE	0	0.018694	0.047	-0.306	0.428834	0.608	0.0938	0.0866537	0.276	-0.212	0.179	0.113	-0.099	-0.193	TRUE	FALSE	FALSE	TRUE
Q0PMG2	Mdga1	9.20482	9.34316	9.12769	9.21989	9.27389	9.23209	9.3204	9.33659	8.90945	8.99362	8.8245	8.76835	9.06513	9.00667	9.01072	9.18568	FALSE	0	3.01e-05	0.000279	-0.35	0.00496727	0.0239	0.193	0.0171515	0.113	-0.157	0.177	0.11	-0.0469	-0.24	TRUE	FALSE	FALSE	TRUE
Q0PHV7	Dact3	7.46123	7.35672	7.39561	7.10156	7.4787	7.43623	7.14825	7.58207	6.78741	7.03843	6.9063	7.01874	7.19873	6.83668	6.96604	7.21249	FALSE	0	0.00287683	0.0104	-0.391	0.304802	0.482	0.116	0.0237976	0.133	-0.275	0.228	0.146	-0.129	-0.245	TRUE	FALSE	FALSE	TRUE
Q0P5V9	Slc45a4	7.07416	7.16714	7.11007	7.04744	6.94455	6.99526	6.98391	7.16396	6.3587	6.85086	6.54027	7.14238	6.80459	7.0131	6.54244	6.98467	FALSE	0	0.0171593	0.0438	-0.377	0.43082	0.61	0.113	0.0796449	0.264	-0.264	0.102	0.179	-0.084	-0.197	TRUE	FALSE	FALSE	TRUE
Q09200	B4galnt1	8.22579	8.33695	8.37503	8.48993	8.35968	8.30711	8.32568	7.95303	8.02047	7.77353	8.12007	8.28559	8.50196	8.30081	8.28032	8.2978	FALSE	0	0.0129335	0.0349	-0.307	0.0160183	0.0581	0.295	0.915217	0.968	-0.0117	-0.0107	0.11	0.0981	-0.197	TRUE	FALSE	FALSE	TRUE
Q08481	Pecam1	7.21534	6.8847	7.09088	6.96405	7.00415	7.06462	7.18099	7.06157	7.34185	7.33863	7.47154	7.52021	7.15085	7.42086	7.02553	7.16994	FALSE	0	0.000502714	0.00261	0.379	0.0180006	0.0632	-0.226	0.091664	0.284	0.153	-0.104	-0.143	0.0102	0.236	TRUE	FALSE	FALSE	TRUE
Q08460	Kcnma1	10.3053	10.2829	10.1793	10.2816	10.2152	10.2267	10.2504	10.1621	9.88402	9.90302	9.90988	9.92297	10.1111	10.0283	10.1534	10.1604	FALSE	0	1.7e-07	5.14e-06	-0.357	7.31e-05	0.000906	0.208	0.00143751	0.0322	-0.149	0.0901	0.139	-0.0102	-0.219	TRUE	FALSE	FALSE	TRUE
Q07409	Cntn3	7.82449	7.82996	7.91852	7.82939	7.90006	7.79138	7.72754	7.81411	7.51305	7.54177	7.47206	7.67248	7.88151	7.85431	7.75272	7.68698	FALSE	0	6.98e-05	0.000548	-0.301	0.000488587	0.00391	0.244	0.313254	0.56	-0.0567	0.0576	0.0999	0.0432	-0.201	TRUE	FALSE	FALSE	TRUE
Q06185	Atp5me	11.288	11.2076	11.0373	10.9691	11.332	11.1876	11.2608	11.406	10.9491	10.7155	10.7448	10.8616	10.9667	10.8311	11.0397	10.8876	FALSE	0	0.00127052	0.00546	-0.308	0.161076	0.312	0.114	0.0238921	0.133	-0.194	0.254	0.0827	-0.112	-0.225	TRUE	FALSE	FALSE	TRUE
Q04207	Rela	7.32319	7.36025	7.24646	7.18435	7.24329	7.36516	7.26028	7.46689	7.62533	7.6014	7.50455	7.64126	7.4452	7.25888	7.51023	7.31932	FALSE	0	0.00022738	0.00142	0.315	0.00554796	0.0261	-0.21	0.124378	0.337	0.105	-0.0633	-0.119	-0.0138	0.196	TRUE	FALSE	FALSE	TRUE
Q03265	Atp5f1a	15.3061	15.2516	15.0603	15.1972	15.0321	15.1688	15.0211	15.1356	14.9372	14.8337	14.9228	14.9513	14.9658	14.9876	15.1341	14.9992	FALSE	0	0.000137108	0.00095	-0.293	0.0709465	0.175	0.11	0.00609504	0.0647	-0.182	0.0329	0.147	-0.0349	-0.145	TRUE	FALSE	FALSE	TRUE
Q03146	Ddr1	7.87497	8.284	8.06506	8.08819	8.4184	8.09498	8.19507	8.53291	8.36265	8.56132	8.29734	8.21931	8.24675	8.19181	8.25519	8.29972	FALSE	0	0.0144683	0.0383	0.282	0.288005	0.467	-0.112	0.114496	0.322	0.17	0.0611	-0.171	-0.00086	0.111	TRUE	FALSE	FALSE	TRUE
Q01341	Adcy6	8.35869	8.46748	8.43221	8.41051	8.38996	8.56304	8.51896	8.42252	8.10334	8.00925	8.06236	8.35119	8.27117	8.16609	8.30069	8.19583	FALSE	0	0.000639045	0.00314	-0.286	0.14193	0.286	0.102	0.0139363	0.1	-0.184	0.16	0.103	-0.0805	-0.182	TRUE	FALSE	FALSE	TRUE
Q01339	Apoh	8.55363	8.28564	8.08538	8.19682	8.13184	8.22636	8.68634	8.69468	9.0237	9.01685	8.83205	8.93765	8.55841	8.59193	8.7413	8.75161	FALSE	0	0.000108575	0.000787	0.672	0.0371391	0.108	-0.292	0.00946689	0.0828	0.38	-0.147	-0.302	0.0787	0.37	TRUE	FALSE	FALSE	TRUE
Q00897	Serpina1d	8.90897	8.34612	8.42203	8.53901	8.25859	8.62869	8.96877	8.77256	9.04636	8.9378	8.81008	8.91637	8.48472	8.75352	8.64052	8.74278	FALSE	0	0.0175977	0.0447	0.374	0.0702866	0.174	-0.272	0.478002	0.707	0.101	-0.0414	-0.145	-0.0432	0.229	TRUE	FALSE	FALSE	TRUE
P98078	Dab2	7.2988	6.92409	7.0094	7.00576	7.02591	7.02991	7.02873	7.18271	7.39237	7.39965	7.24694	7.36662	6.82008	7.3294	7.10575	7.2556	FALSE	0	0.0109446	0.0306	0.292	0.0414097	0.117	-0.224	0.505111	0.727	0.0682	-0.0845	-0.0918	-0.0237	0.2	TRUE	FALSE	FALSE	TRUE
P97772	Grm1	8.69224	8.78416	8.77101	8.75241	8.78588	8.76861	8.61513	8.77304	8.45741	8.51688	8.49878	8.43265	8.55231	8.54267	8.70952	8.60479	FALSE	0	3.87e-05	0.00034	-0.274	0.0169531	0.0604	0.126	0.00670878	0.0673	-0.148	0.0946	0.109	-0.0388	-0.165	TRUE	FALSE	FALSE	TRUE
P97461	Rps5	13.2621	13.1398	13.1931	13.1827	12.9551	13.03	13.1048	12.9088	13.099	12.9041	12.8108	12.88	12.8486	13.0883	13.0334	13.0959	FALSE	0	0.00132143	0.00565	-0.271	0.191976	0.354	0.0931	0.0200952	0.121	-0.178	-0.0339	0.161	-0.017	-0.11	TRUE	FALSE	FALSE	TRUE
P97412	Lyst	8.74762	8.6653	8.7113	8.6511	8.6816	8.66264	8.77296	8.57065	8.44517	8.41572	8.4464	8.38961	8.54965	8.54238	8.4699	8.64743	FALSE	0	3.84e-05	0.000338	-0.27	0.014207	0.0533	0.128	0.00795813	0.0747	-0.141	0.0864	0.108	-0.0333	-0.161	TRUE	FALSE	FALSE	TRUE
P97370	Atp1b3	12.2631	12.1337	12.3012	12.2652	12.1166	12.1962	12.3093	12.0726	12.6086	12.5741	12.5476	12.4743	12.3231	12.372	12.4002	12.385	FALSE	0	3.31e-05	0.000301	0.31	0.00361481	0.0187	-0.181	0.0260325	0.138	0.129	-0.16	-0.0931	0.0361	0.217	TRUE	FALSE	FALSE	TRUE
P97333	Nrp1	10.1959	10.4278	10.3916	10.3653	10.4435	10.1792	10.3564	10.4176	10.0124	10.1609	9.97075	9.94327	10.2505	10.1494	10.2278	10.2195	FALSE	0	0.000226744	0.00142	-0.323	0.0119928	0.0469	0.19	0.0624972	0.233	-0.133	0.117	0.113	-0.0202	-0.21	TRUE	FALSE	FALSE	TRUE
P97291	Cdh8	8.6932	8.7304	8.77836	8.76097	8.85487	8.7461	8.81946	8.67471	8.37694	8.43848	8.49103	8.40904	8.5962	8.58589	8.50432	8.64412	FALSE	0	5.5e-06	7.4e-05	-0.312	0.00366661	0.0189	0.154	0.00301537	0.0456	-0.158	0.142	0.109	-0.0489	-0.203	TRUE	FALSE	FALSE	TRUE
P97290	Serping1	6.98933	6.79622	6.8406	6.61168	6.73928	6.92118	7.10203	7.00213	7.2367	7.34749	6.82833	7.20048	6.85675	6.92405	6.96792	6.92746	FALSE	0	0.00579718	0.0183	0.344	0.0439791	0.123	-0.234	0.318178	0.565	0.11	-0.0146	-0.146	-0.0367	0.198	TRUE	FALSE	FALSE	TRUE
P86046	Kcnj13	8.23914	7.27565	6.69849	6.6017	6.81423	6.47947	8.07085	7.93756	8.38084	8.67861	8.47224	8.41605	7.72879	8.32736	7.82451	7.8769	FALSE	0	0.00376756	0.0129	1.28	0.16156	0.313	-0.548	0.066947	0.24	0.736	-0.413	-0.535	0.2	0.748	TRUE	FALSE	FALSE	TRUE
P84078	Arf1	14.2961	14.3857	14.2388	14.2492	14.1573	14.2314	14.0315	14.3323	14.0476	14.0052	14.0599	13.9974	14.2195	14.1629	14.2464	14.1844	FALSE	0	0.000236972	0.00146	-0.265	0.0058942	0.0273	0.176	0.122627	0.335	-0.0892	0.0103	0.115	0.0255	-0.15	TRUE	FALSE	FALSE	TRUE
P83510	Tnik	10.28	10.2829	10.4317	10.2561	10.3594	10.4071	10.3846	10.4487	9.96001	10.0404	10.0656	10.0396	10.3136	10.2802	10.2424	10.3145	FALSE	0	6.63e-06	8.56e-05	-0.286	1.79e-05	0.000313	0.261	0.555251	0.764	-0.025	0.143	0.056	0.031	-0.23	TRUE	FALSE	FALSE	TRUE
P70403	Cux1	7.63788	7.77408	7.60363	7.54042	7.66801	8.07803	7.81964	7.93546	7.47511	7.38105	7.04135	7.27705	7.23989	7.36208	7.49694	7.45414	FALSE	0	0.00362356	0.0125	-0.345	0.356198	0.537	0.0946	0.0240145	0.133	-0.251	0.326	0.09	-0.161	-0.255	TRUE	FALSE	FALSE	TRUE
P70268	Pkn1	8.44259	8.58401	8.35296	8.22068	8.47919	8.46138	8.48826	8.56952	8.81292	8.74182	8.80716	8.57548	8.47018	8.46291	8.43611	8.62778	FALSE	0	0.000425703	0.00229	0.334	0.0061684	0.0282	-0.235	0.19626	0.437	0.0992	-0.0337	-0.133	-0.0341	0.201	TRUE	FALSE	FALSE	TRUE
P70206	Plxna1	10.2851	10.2606	10.178	10.2741	10.1588	10.2151	10.1968	10.1698	9.98361	10.0376	9.90176	9.93512	10.1108	10.0646	10.1864	10.1459	FALSE	0	3.36e-06	5.09e-05	-0.285	0.000879342	0.0062	0.162	0.00680808	0.0681	-0.123	0.0536	0.118	-0.00457	-0.167	TRUE	FALSE	FALSE	TRUE
P70193	Lrig1	5.48173	5.73589	5.00072	5.54038	5.86272	5.35505	5.57137	5.69059	5.79614	5.89413	6.07487	5.72129	5.22131	5.5194	5.57634	5.68705	FALSE	0	0.011854	0.0325	0.432	0.026489	0.0845	-0.371	0.687932	0.851	0.0613	0.0119	-0.168	-0.107	0.264	TRUE	FALSE	FALSE	TRUE
P63268	Actg2	8.67339	8.68313	8.93912	8.60821	9.38738	9.00468	9.56972	9.44199	9.32728	9.54642	8.96993	9.4777	9.07872	9.26547	8.95484	9.13363	FALSE	0	0.000465403	0.00244	0.604	0.118249	0.251	-0.222	0.0124655	0.0934	0.382	0.222	-0.403	-0.0207	0.201	TRUE	FALSE	FALSE	TRUE
[truncated: 5,784 more rows]
