# Supplementary material for: PKD1-tau disulfide linkage promotes tau phosphorylation and tau accumulation in a tauopathy mouse model
Source: Research Square preprint supplement (doi:10.21203/rs.3.rs-7655539/v1), 2025-10-13
Supplement: Supplementary file 5 [file aeac700de7e79aa7d4b30903.xlsx]

## Sheet: Table S6
Network	Annotation
Up reverted proteins_MCODE_ALL	GO:0099504|synaptic vesicle cycle|-22.3;GO:0099003|vesicle-mediated transport in synapse|-21.4;GO:0007268|chemical synaptic transmission|-18.7
Up reverted proteins_SUB1_MCODE_1	GO:0033173|calcineurin-NFAT signaling cascade|-9.1;GO:0097720|calcineurin-mediated signaling|-8.7;GO:1905949|negative regulation of calcium ion import across plasma membrane|-7.8
Up reverted proteins_SUB1_MCODE_2	R-MMU-181429|Serotonin Neurotransmitter Release Cycle|-24.3;R-MMU-212676|Dopamine Neurotransmitter Release Cycle|-23.1;R-MMU-112315|Transmission across Chemical Synapses|-20.7
Up reverted proteins_SUB1_MCODE_3	GO:0061577|calcium ion transmembrane transport via high voltage-gated calcium channel|-11.2;mmu04010|MAPK signaling pathway - Mus musculus (house mouse)|-9.3;mmu05412|Arrhythmogenic right ventricular cardiomyopathy - Mus musculus (house mouse)|-8.9
Up reverted proteins_SUB1_MCODE_4	GO:0048013|ephrin receptor signaling pathway|-11.1;mmu04360|Axon guidance - Mus musculus (house mouse)|-8.3;R-MMU-3928665|EPH-ephrin mediated repulsion of cells|-7.9
Up reverted proteins_SUB1_MCODE_5	mmu04360|Axon guidance - Mus musculus (house mouse)|-8.3;GO:0008037|cell recognition|-5.9;GO:0031175|neuron projection development|-5.7
Up reverted proteins_SUB1_MCODE_7	GO:0140029|exocytic process|-7.3;GO:0017157|regulation of exocytosis|-5.9;GO:0006887|exocytosis|-5.8
Up reverted proteins_SUB2_MCODE_8	WP103|Cholesterol biosynthesis|-9.5;mmu00900|Terpenoid backbone biosynthesis - Mus musculus (house mouse)|-9.0;R-MMU-191273|Cholesterol biosynthesis|-8.7
Down reverted proteins_MCODE_ALL	GO:0016042|lipid catabolic process|-15.0;GO:0044242|cellular lipid catabolic process|-12.5;R-MMU-77286|mitochondrial fatty acid beta-oxidation of saturated fatty acids|-12.2
Down reverted proteins_SUB1_MCODE_1	GO:0030029|actin filament-based process|-15.7;GO:0030036|actin cytoskeleton organization|-14.8;mmu04810|Regulation of actin cytoskeleton - Mus musculus (house mouse)|-14.2
Down reverted proteins_SUB1_MCODE_2	mmu00071|Fatty acid degradation - Mus musculus (house mouse)|-21.0;GO:0006635|fatty acid beta-oxidation|-20.6;WP1269|Fatty acid beta oxidation|-19.6
Down reverted proteins_SUB1_MCODE_3	mmu00480|Glutathione metabolism - Mus musculus (house mouse)|-16.5;WP4466|Oxidative stress and redox pathway|-15.7;GO:0006749|glutathione metabolic process|-13.9
Down reverted proteins_SUB1_MCODE_4	GO:1905918|regulation of CoA-transferase activity|-12.7;GO:1905920|positive regulation of CoA-transferase activity|-12.7;GO:0034375|high-density lipoprotein particle remodeling|-11.6
Down reverted proteins_SUB1_MCODE_5	mmu04070|Phosphatidylinositol signaling system - Mus musculus (house mouse)|-11.0;mmu00562|Inositol phosphate metabolism - Mus musculus (house mouse)|-8.7;GO:0046488|phosphatidylinositol metabolic process|-7.5
Down reverted proteins_SUB1_MCODE_6	mmu04630|JAK-STAT signaling pathway - Mus musculus (house mouse)|-10.5;GO:0007259|receptor signaling pathway via JAK-STAT|-9.7;GO:0097696|receptor signaling pathway via STAT|-9.6
Down reverted proteins_SUB1_MCODE_7	GO:0071526|semaphorin-plexin signaling pathway|-10.8;mmu04360|Axon guidance - Mus musculus (house mouse)|-8.3;GO:0050770|regulation of axonogenesis|-8.2
Down reverted proteins_SUB1_MCODE_8	GO:0035967|cellular response to topologically incorrect protein|-6.7;R-MMU-3371556|Cellular response to heat stress|-6.7;GO:0035966|response to topologically incorrect protein|-6.2
Down reverted proteins_SUB1_MCODE_9	GO:0106380|purine ribonucleotide salvage|-12.7;GO:0032261|purine nucleotide salvage|-12.3;GO:0043101|purine-containing compound salvage|-12.1
Down reverted proteins_SUB1_MCODE_10	R-MMU-2029482|Regulation of actin dynamics for phagocytic cup formation|-7.8;R-MMU-2029480|Fcgamma receptor (FCGR) dependent phagocytosis|-7.4;mmu04666|Fc gamma R-mediated phagocytosis - Mus musculus (house mouse)|-7.1
Down reverted proteins_SUB1_MCODE_11	R-MMU-114608|Platelet degranulation|-6.8;R-MMU-76005|Response to elevated platelet cytosolic Ca2+|-6.7;R-MMU-76002|Platelet activation, signaling and aggregation|-5.8
Down reverted proteins_SUB1_MCODE_12	R-MMU-9006934|Signaling by Receptor Tyrosine Kinases|-5.2
Down reverted proteins_SUB1_MCODE_13	GO:0006935|chemotaxis|-5.4;GO:0042330|taxis|-5.4;GO:0040011|locomotion|-5.3
Down reverted proteins_SUB1_MCODE_14	mmu00520|Amino sugar and nucleotide sugar metabolism - Mus musculus (house mouse)|-7.9;GO:1901136|carbohydrate derivative catabolic process|-6.0;GO:0046395|carboxylic acid catabolic process|-6.0
Down reverted proteins_SUB3_MCODE_15	WP4344|Sphingolipid metabolism overview|-8.8;WP4690|Sphingolipid metabolism integrated pathway|-8.8;mmu00600|Sphingolipid metabolism - Mus musculus (house mouse)|-7.8
