# Supplementary material for: PKD1-tau disulfide linkage promotes tau phosphorylation and tau accumulation in a tauopathy mouse model
Source: Research Square preprint supplement (doi:10.21203/rs.3.rs-7655539/v1), 2025-10-13
Supplement: Supplementary file 6 [file c2c2702856428b6f93d578eb.xlsx]

## Sheet: Table S7
Gene Name	Protein Accession	Annotation	PSM# (Dataset 1)	Direction in one-tailed t-tests	Fisher's combined P	Median of log2(AD/ctl)	BH FDR	Mouse.Gene
DDAH1	sp|O94760|DDAH1_HUMAN	N(G),N(G)-dimethylarginine dimethylaminohydrolase 1 OS=Homo sapiens GN=DDAH1 PE=1 SV=3	678	Up in AD	1.05985e-09	0.359312	1.85132e-07	Ddah1
BASP1	sp|P80723|BASP1_HUMAN	Brain acid soluble protein 1 OS=Homo sapiens GN=BASP1 PE=1 SV=2	296	Up in AD	9.37271e-08	0.140283	1.18435e-05	Basp1
ITGAM	sp|P11215|ITAM_HUMAN	Integrin alpha-M OS=Homo sapiens GN=ITGAM PE=1 SV=2	60	Up in AD	1.01328e-07	0.319563	1.25373e-05	Itgam
PDLIM5	sp|Q96HC4|PDLI5_HUMAN	PDZ and LIM domain protein 5 OS=Homo sapiens GN=PDLIM5 PE=1 SV=5	215	Up in AD	1.49697e-07	0.653006	1.74324e-05	Pdlim5
GLO1	sp|Q04760|LGUL_HUMAN	Lactoylglutathione lyase OS=Homo sapiens GN=GLO1 PE=1 SV=4	232	Up in AD	9.60484e-07	0.177834	8.913e-05	Glo1
ITGB2	sp|P05107|ITB2_HUMAN	Integrin beta-2 OS=Homo sapiens GN=ITGB2 PE=1 SV=2	80	Up in AD	1.05011e-06	0.0748609	9.59477e-05	Itgb2
PLXNB2	sp|O15031|PLXB2_HUMAN	Plexin-B2 OS=Homo sapiens GN=PLXNB2 PE=1 SV=3	397	Up in AD	1.9737e-06	0.231804	0.000165334	Plxnb2
PBXIP1	sp|Q96AQ6|PBIP1_HUMAN	Pre-B-cell leukemia transcription factor-interacting protein 1 OS=Homo sapiens GN=PBXIP1 PE=1 SV=1	107	Up in AD	1.97654e-06	0.0868903	0.000165334	Pbxip1
EPHA4	sp|P54764|EPHA4_HUMAN	Ephrin type-A receptor 4 OS=Homo sapiens GN=EPHA4 PE=1 SV=1	265	Up in AD	5.42277e-06	0.0562259	0.000370182	Epha4
AP3M2	sp|P53677|AP3M2_HUMAN	AP-3 complex subunit mu-2 OS=Homo sapiens GN=AP3M2 PE=2 SV=1	67	Up in AD	1.14001e-05	0.664254	0.000710798	Ap3m2
DBI	sp|P07108|ACBP_HUMAN	Acyl-CoA-binding protein OS=Homo sapiens GN=DBI PE=1 SV=2	408	Up in AD	4.13995e-05	0.156478	0.00187688	Dbi
BSN	sp|Q9UPA5|BSN_HUMAN	Protein bassoon OS=Homo sapiens GN=BSN PE=1 SV=4	64	Up in AD	4.95979e-05	0.0792189	0.00210401	Bsn
SEZ6L	sp|Q9BYH1|SE6L1_HUMAN	Seizure 6-like protein OS=Homo sapiens GN=SEZ6L PE=1 SV=1	96	Up in AD	5.4017e-05	0.0284065	0.0022434	Sez6l
SERPINE2	sp|P07093-2|GDN_HUMAN	Isoform 2 of Glia-derived nexin OS=Homo sapiens GN=SERPINE2	92	Up in AD	6.98202e-05	0.278639	0.00264116	Serpine2
CPLX2	sp|Q6PUV4|CPLX2_HUMAN	Complexin-2 OS=Homo sapiens GN=CPLX2 PE=2 SV=2	27	Up in AD	9.97974e-05	0.297148	0.00342599	Cplx2
PRDX1	sp|Q06830|PRDX1_HUMAN	Peroxiredoxin-1 OS=Homo sapiens GN=PRDX1 PE=1 SV=1	913	Up in AD	0.000130566	0.089859	0.00435234	Prdx1
NRXN3	sp|Q9Y4C0-4|NRX3A_HUMAN	Isoform 4a of Neurexin-3 OS=Homo sapiens GN=NRXN3	438	Up in AD	0.000131178	0.109872	0.00435234	Nrxn3
DDAH2	sp|O95865|DDAH2_HUMAN	N(G),N(G)-dimethylarginine dimethylaminohydrolase 2 OS=Homo sapiens GN=DDAH2 PE=1 SV=1	199	Up in AD	0.000157636	0.0963269	0.00482578	Ddah2
TPT1	sp|P13693|TCTP_HUMAN	Translationally-controlled tumor protein OS=Homo sapiens GN=TPT1 PE=1 SV=1	125	Up in AD	0.000228835	0.156234	0.00612185	Tpt1
PRDX6	sp|P30041|PRDX6_HUMAN	Peroxiredoxin-6 OS=Homo sapiens GN=PRDX6 PE=1 SV=3	610	Up in AD	0.000251567	0.105904	0.00646777	Prdx6
SCN2B	sp|O60939|SCN2B_HUMAN	Sodium channel subunit beta-2 OS=Homo sapiens GN=SCN2B PE=1 SV=1	26	Up in AD	0.000279498	0.185618	0.0068671	Scn2b
PACSIN3	sp|Q9UKS6|PACN3_HUMAN	Protein kinase C and casein kinase substrate in neurons protein 3 OS=Homo sapiens GN=PACSIN3 PE=1 SV=2	78	Up in AD	0.000413386	0.638423	0.00834811	Pacsin3
CDH9	sp|Q9ULB4|CADH9_HUMAN	Cadherin-9 OS=Homo sapiens GN=CDH9 PE=2 SV=2	26	Up in AD	0.000769032	0.0105301	0.0123107	Cdh9
SNTB1	sp|Q13884|SNTB1_HUMAN	Beta-1-syntrophin OS=Homo sapiens GN=SNTB1 PE=1 SV=3	123	Up in AD	0.000855409	0.61826	0.0132299	Sntb1
GPNMB	sp|Q14956|GPNMB_HUMAN	Transmembrane glycoprotein NMB OS=Homo sapiens GN=GPNMB PE=1 SV=2	39	Up in AD	0.00104132	0.280122	0.0146897	Gpnmb
ABHD14B	sp|Q96IU4|ABHEB_HUMAN	Protein ABHD14B OS=Homo sapiens GN=ABHD14B PE=1 SV=1	198	Up in AD	0.00157589	0.285038	0.019447	Abhd14b
AQP4	sp|P55087|AQP4_HUMAN	Aquaporin-4 OS=Homo sapiens GN=AQP4 PE=1 SV=2	56	Up in AD	0.00206693	0.0395757	0.0226486	Aqp4
PLXDC2	sp|Q6UX71|PXDC2_HUMAN	Plexin domain-containing protein 2 OS=Homo sapiens GN=PLXDC2 PE=1 SV=1	209	Up in AD	0.00232174	0.0730036	0.0239208	Plxdc2
PCDH8	sp|O95206|PCDH8_HUMAN	Protocadherin-8 OS=Homo sapiens GN=PCDH8 PE=2 SV=2	47	Up in AD	0.00285573	0.0489776	0.0271797	Pcdh8
DAG1	sp|Q14118|DAG1_HUMAN	Dystroglycan OS=Homo sapiens GN=DAG1 PE=1 SV=2	378	Up in AD	0.00292989	0.0334529	0.0276639	Dag1
C1QL3	sp|Q5VWW1|C1QL3_HUMAN	Complement C1q-like protein 3 OS=Homo sapiens GN=C1QL3 PE=2 SV=1	18	Up in AD	0.00298942	0.0602838	0.0279154	C1ql3
TSC22D4	sp|Q9Y3Q8|T22D4_HUMAN	TSC22 domain family protein 4 OS=Homo sapiens GN=TSC22D4 PE=1 SV=2	31	Up in AD	0.00397975	0.415528	0.0339107	Tsc22d4
SPON1	sp|Q9HCB6|SPON1_HUMAN	Spondin-1 OS=Homo sapiens GN=SPON1 PE=1 SV=2	164	Up in AD	0.00429818	0.0631097	0.0356521	Spon1
CD14	sp|P08571|CD14_HUMAN	Monocyte differentiation antigen CD14 OS=Homo sapiens GN=CD14 PE=1 SV=2	369	Up in AD	0.00445884	0.0965803	0.0365944	Cd14
MSI1	sp|O43347|MSI1H_HUMAN	RNA-binding protein Musashi homolog 1 OS=Homo sapiens GN=MSI1 PE=1 SV=1	14	Up in AD	0.00486113	0.55741	0.0387808	Msi1
GNA13	sp|Q14344|GNA13_HUMAN	Guanine nucleotide-binding protein subunit alpha-13 OS=Homo sapiens GN=GNA13 PE=1 SV=2	129	Up in AD	0.00533496	0.614202	0.040883	Gna13
PLXNB1	sp|O43157|PLXB1_HUMAN	Plexin-B1 OS=Homo sapiens GN=PLXNB1 PE=1 SV=3	108	Up in AD	0.00639885	0.116483	0.0456216	Plxnb1
EGFR	sp|P00533|EGFR_HUMAN	Epidermal growth factor receptor OS=Homo sapiens GN=EGFR PE=1 SV=2	71	Up in AD	0.00681716	0.134581	0.0476244	Egfr
UGP2	sp|Q16851|UGPA_HUMAN	UTP--glucose-1-phosphate uridylyltransferase OS=Homo sapiens GN=UGP2 PE=1 SV=5	456	Up in AD	0.00778467	0.265457	0.0524781	Ugp2
UPP1	sp|Q16831|UPP1_HUMAN	Uridine phosphorylase 1 OS=Homo sapiens GN=UPP1 PE=1 SV=1	34	Up in AD	0.0082546	0.566858	0.0539913	Upp1
APP	sp|P05067|A4_HUMAN	Amyloid beta A4 protein OS=Homo sapiens GN=APP PE=1 SV=3	722	Up in AD	0.00833445	0.0820392	0.0543985	App
CD2AP	sp|Q9Y5K6|CD2AP_HUMAN	CD2-associated protein OS=Homo sapiens GN=CD2AP PE=1 SV=1	128	Up in AD	0.00949895	0.400946	0.0591965	Cd2ap
RP2	sp|O75695|XRP2_HUMAN	Protein XRP2 OS=Homo sapiens GN=RP2 PE=1 SV=4	40	Up in AD	0.00960513	0.565146	0.0596703	Rp2
BAIAP2	sp|Q9UQB8|BAIP2_HUMAN	Brain-specific angiogenesis inhibitor 1-associated protein 2 OS=Homo sapiens GN=BAIAP2 PE=1 SV=1	74	Up in AD	0.0103996	0.388125	0.0626399	Baiap2
EZR	sp|P15311|EZRI_HUMAN	Ezrin OS=Homo sapiens GN=EZR PE=1 SV=4	1637	Up in AD	0.0116053	0.167731	0.0675722	Ezr
HSPB8	sp|Q9UJY1|HSPB8_HUMAN	Heat shock protein beta-8 OS=Homo sapiens GN=HSPB8 PE=1 SV=1	41	Up in AD	0.0121596	0.462294	0.0697342	Hspb8
SLC5A3	sp|P53794|SC5A3_HUMAN	Sodium/myo-inositol cotransporter OS=Homo sapiens GN=SLC5A3 PE=1 SV=2	52	Up in AD	0.0134232	1.07743	0.0742965	Slc5a3
VCAN	sp|P13611|CSPG2_HUMAN	Versican core protein OS=Homo sapiens GN=VCAN PE=1 SV=3	225	Up in AD	0.0134671	0.0631094	0.0743857	Vcan
ARHGEF10	sp|O15013|ARHGA_HUMAN	Rho guanine nucleotide exchange factor 10 OS=Homo sapiens GN=ARHGEF10 PE=1 SV=4	20	Up in AD	0.0139907	0.30781	0.0755368	Arhgef10
NPEPL1	sp|Q8NDH3|PEPL1_HUMAN	Probable aminopeptidase NPEPL1 OS=Homo sapiens GN=NPEPL1 PE=1 SV=3	62	Up in AD	0.0141138	0.512978	0.0760633	Npepl1
SNAP23	sp|O00161|SNP23_HUMAN	Synaptosomal-associated protein 23 OS=Homo sapiens GN=SNAP23 PE=1 SV=1	62	Up in AD	0.0152007	0.473855	0.0796092	Snap23
MTM1	sp|Q13496|MTM1_HUMAN	Myotubularin OS=Homo sapiens GN=MTM1 PE=1 SV=2	53	Up in AD	0.0159604	0.222523	0.0816238	Mtm1
MSN	sp|P26038|MOES_HUMAN	Moesin OS=Homo sapiens GN=MSN PE=1 SV=3	1402	Up in AD	0.0231017	0.0749648	0.104516	Msn
PDLIM4	sp|P50479|PDLI4_HUMAN	PDZ and LIM domain protein 4 OS=Homo sapiens GN=PDLIM4 PE=1 SV=2	61	Up in AD	0.0253272	0.236412	0.111304	Pdlim4
ARAP1	sp|Q96P48|ARAP1_HUMAN	Arf-GAP with Rho-GAP domain, ANK repeat and PH domain-containing protein 1 OS=Homo sapiens GN=ARAP1 PE=1 SV=3	74	Up in AD	0.0260166	0.352029	0.113113	Arap1
FAM114A1	sp|Q8IWE2|NXP20_HUMAN	Protein NOXP20 OS=Homo sapiens GN=FAM114A1 PE=1 SV=2	115	Up in AD	0.0288763	0.342703	0.121456	Fam114a1
SPG11	sp|Q96JI7|SPTCS_HUMAN	Spatacsin OS=Homo sapiens GN=SPG11 PE=1 SV=3	45	Up in AD	0.0325451	0.399506	0.131935	Spg11
ITGB5	sp|P18084|ITB5_HUMAN	Integrin beta-5 OS=Homo sapiens GN=ITGB5 PE=1 SV=1	32	Up in AD	0.0342521	0.411571	0.137078	Itgb5
ASPH	sp|Q12797|ASPH_HUMAN	Aspartyl/asparaginyl beta-hydroxylase OS=Homo sapiens GN=ASPH PE=1 SV=3	74	Up in AD	0.0418917	0.0743392	0.157068	Asph
CD44	sp|P16070-10|CD44_HUMAN	Isoform 10 of CD44 antigen OS=Homo sapiens GN=CD44	161	Up in AD	0.046806	0.0183575	0.170645	Cd44
ITGA6	sp|P23229|ITA6_HUMAN	Integrin alpha-6 OS=Homo sapiens GN=ITGA6 PE=1 SV=5	51	Up in AD	0.0511378	0.0796873	0.180563	Itga6
GJA1	sp|P17302|CXA1_HUMAN	Gap junction alpha-1 protein OS=Homo sapiens GN=GJA1 PE=1 SV=2	75	Up in AD	0.0521501	0.0506533	0.183578	Gja1
RDX	sp|P35241|RADI_HUMAN	Radixin OS=Homo sapiens GN=RDX PE=1 SV=1	1116	Up in AD	0.0553608	0.0165196	0.190121	Rdx
CNN3	sp|Q15417|CNN3_HUMAN	Calponin-3 OS=Homo sapiens GN=CNN3 PE=1 SV=1	132	Up in AD	0.0588664	0.341693	0.199065	Cnn3
NXN	sp|Q6DKJ4|NXN_HUMAN	Nucleoredoxin OS=Homo sapiens GN=NXN PE=1 SV=2	75	Up in AD	0.0653994	0.22405	0.214235	Nxn
PTPRF	sp|P10586|PTPRF_HUMAN	Receptor-type tyrosine-protein phosphatase F OS=Homo sapiens GN=PTPRF PE=1 SV=2	215	Up in AD	0.0656795	0.00105604	0.215033	Ptprf
DFFA	sp|O00273|DFFA_HUMAN	DNA fragmentation factor subunit alpha OS=Homo sapiens GN=DFFA PE=1 SV=1	77	Up in AD	0.0771343	0.248982	0.239843	Dffa
SLC38A3	sp|Q99624|S38A3_HUMAN	Sodium-coupled neutral amino acid transporter 3 OS=Homo sapiens GN=SLC38A3 PE=1 SV=1	24	Up in AD	0.0782485	0.282344	0.24204	Slc38a3
OPLAH	sp|O14841|OPLA_HUMAN	5-oxoprolinase OS=Homo sapiens GN=OPLAH PE=1 SV=3	226	Up in AD	0.0806697	0.204082	0.245943	Oplah
CARHSP1	sp|Q9Y2V2|CHSP1_HUMAN	Calcium-regulated heat-stable protein 1 OS=Homo sapiens GN=CARHSP1 PE=1 SV=2	57	Up in AD	0.080935	0.134417	0.246576	Carhsp1
OLFM1	sp|Q99784|NOE1_HUMAN	Noelin OS=Homo sapiens GN=OLFM1 PE=1 SV=4	67	Up in AD	0.0856422	0.010741	0.255257	Olfm1
OLFM2	sp|O95897|NOE2_HUMAN	Noelin-2 OS=Homo sapiens GN=OLFM2 PE=1 SV=2	38	Up in AD	0.0923234	0.298705	0.269572	Olfm2
BDH2	sp|Q9BUT1|BDH2_HUMAN	3-hydroxybutyrate dehydrogenase type 2 OS=Homo sapiens GN=BDH2 PE=1 SV=2	151	Up in AD	0.0929025	0.316228	0.270996	Bdh2
TRHDE	sp|Q9UKU6|TRHDE_HUMAN	Thyrotropin-releasing hormone-degrading ectoenzyme OS=Homo sapiens GN=TRHDE PE=2 SV=1	18	Up in AD	0.104178	0.131343	0.292536	Trhde
YAP1	sp|P46937|YAP1_HUMAN	Transcriptional coactivator YAP1 OS=Homo sapiens GN=YAP1 PE=1 SV=2	77	Up in AD	0.105931	0.195678	0.295568	Yap1
CA2	sp|P00918|CAH2_HUMAN	Carbonic anhydrase 2 OS=Homo sapiens GN=CA2 PE=1 SV=2	1773	Up in AD	0.108991	0.193493	0.301488	Car2
SCRN2	sp|Q96FV2|SCRN2_HUMAN	Secernin-2 OS=Homo sapiens GN=SCRN2 PE=1 SV=3	105	Up in AD	0.111146	0.096508	0.30546	Scrn2
LYN	sp|P07948|LYN_HUMAN	Tyrosine-protein kinase Lyn OS=Homo sapiens GN=LYN PE=1 SV=3	67	Up in AD	0.111638	0.283765	0.306516	Lyn
YBX1	sp|P67809|YBOX1_HUMAN	Nuclease-sensitive element-binding protein 1 OS=Homo sapiens GN=YBX1 PE=1 SV=3	58	Up in AD	0.112439	0.101155	0.30844	Ybx1
GPC4	sp|O75487|GPC4_HUMAN	Glypican-4 OS=Homo sapiens GN=GPC4 PE=1 SV=4	61	Up in AD	0.11291	0.176784	0.309305	Gpc4
ATP2B1	sp|P20020|AT2B1_HUMAN	Plasma membrane calcium-transporting ATPase 1 OS=Homo sapiens GN=ATP2B1 PE=1 SV=3	335	Up in AD	0.121672	0.146036	0.327565	Atp2b1
GSTM2	sp|P28161|GSTM2_HUMAN	Glutathione S-transferase Mu 2 OS=Homo sapiens GN=GSTM2 PE=1 SV=2	442	Up in AD	0.128053	0.204191	0.339311	Gstm2
GAB1	sp|Q13480|GAB1_HUMAN	GRB2-associated-binding protein 1 OS=Homo sapiens GN=GAB1 PE=1 SV=2	34	Up in AD	0.140493	0.207915	0.359671	Gab1
RIMBP2	sp|O15034|RIMB2_HUMAN	RIMS-binding protein 2 OS=Homo sapiens GN=RIMBP2 PE=1 SV=3	7	Up in AD	0.149956	0.219535	0.377049	Rimbp2
DAGLB	sp|Q8NCG7|DGLB_HUMAN	Sn1-specific diacylglycerol lipase beta OS=Homo sapiens GN=DAGLB PE=1 SV=2	8	Up in AD	0.150613	0.16126	0.377776	Daglb
PTER	sp|Q96BW5|PTER_HUMAN	Phosphotriesterase-related protein OS=Homo sapiens GN=PTER PE=1 SV=1	92	Up in AD	0.156515	0.169889	0.387401	Pter
EPN1	sp|Q9Y6I3-1|EPN1_HUMAN	Isoform 2 of Epsin-1 OS=Homo sapiens GN=EPN1	76	Up in AD	0.15863	0.181884	0.390914	Epn1
HEPACAM	sp|Q14CZ8|HECAM_HUMAN	Hepatocyte cell adhesion molecule OS=Homo sapiens GN=HEPACAM PE=1 SV=1	50	Up in AD	0.161235	0.0733191	0.395365	Hepacam
GNG12	sp|Q9UBI6|GBG12_HUMAN	Guanine nucleotide-binding protein G(I)/G(S)/G(O) subunit gamma-12 OS=Homo sapiens GN=GNG12 PE=1 SV=3	39	Up in AD	0.169864	0.0935785	0.408761	Gng12
CA4	sp|P22748|CAH4_HUMAN	Carbonic anhydrase 4 OS=Homo sapiens GN=CA4 PE=1 SV=2	59	Up in AD	0.179978	0.0657214	0.424668	Car4
SAT2	sp|Q96F10|SAT2_HUMAN	Diamine acetyltransferase 2 OS=Homo sapiens GN=SAT2 PE=1 SV=1	55	Up in AD	0.193996	0.205356	0.449354	Sat2
CD109	sp|Q6YHK3|CD109_HUMAN	CD109 antigen OS=Homo sapiens GN=CD109 PE=1 SV=2	197	Up in AD	0.198417	0.0662469	0.45692	Cd109
PPP1R14C	sp|Q8TAE6|PP14C_HUMAN	Protein phosphatase 1 regulatory subunit 14C OS=Homo sapiens GN=PPP1R14C PE=1 SV=3	8	Up in AD	0.203122	0.245572	0.464617	Ppp1r14c
ATP1A2	sp|P50993|AT1A2_HUMAN	Sodium/potassium-transporting ATPase subunit alpha-2 OS=Homo sapiens GN=ATP1A2 PE=1 SV=1	968	Up in AD	0.205943	0.0590667	0.468345	Atp1a2
AMIGO1	sp|Q86WK6|AMGO1_HUMAN	Amphoterin-induced protein 1 OS=Homo sapiens GN=AMIGO1 PE=1 SV=1	10	Up in AD	0.206057	0.120731	0.468345	Amigo1
CPNE3	sp|O75131|CPNE3_HUMAN	Copine-3 OS=Homo sapiens GN=CPNE3 PE=1 SV=1	147	Up in AD	0.211718	0.058233	0.476954	Cpne3
CTNNA1	sp|P35221|CTNA1_HUMAN	Catenin alpha-1 OS=Homo sapiens GN=CTNNA1 PE=1 SV=1	128	Up in AD	0.214552	0.115544	0.481201	Ctnna1
CLIC1	sp|O00299|CLIC1_HUMAN	Chloride intracellular channel protein 1 OS=Homo sapiens GN=CLIC1 PE=1 SV=4	168	Up in AD	0.239069	0.0591268	0.517997	Clic1
PLCB3	sp|Q01970|PLCB3_HUMAN	1-phosphatidylinositol 4,5-bisphosphate phosphodiesterase beta-3 OS=Homo sapiens GN=PLCB3 PE=1 SV=2	79	Up in AD	0.243445	0.0962967	0.524419	Plcb3
PYCARD	sp|Q9ULZ3|ASC_HUMAN	Apoptosis-associated speck-like protein containing a CARD OS=Homo sapiens GN=PYCARD PE=1 SV=2	38	Up in AD	0.260204	0.100781	0.551125	Pycard
ANO6	sp|Q4KMQ2|ANO6_HUMAN	Anoctamin-6 OS=Homo sapiens GN=ANO6 PE=1 SV=2	74	Up in AD	0.263048	0.120089	0.555958	Ano6
UNC5B	sp|Q8IZJ1|UNC5B_HUMAN	Netrin receptor UNC5B OS=Homo sapiens GN=UNC5B PE=1 SV=2	37	Up in AD	0.273103	0.0467006	0.570319	Unc5b
MICALL2	sp|Q8IY33|MILK2_HUMAN	MICAL-like protein 2 OS=Homo sapiens GN=MICALL2 PE=1 SV=1	9	Up in AD	0.274127	0.0908291	0.571442	Micall2
LLGL1	sp|Q15334|L2GL1_HUMAN	Lethal(2) giant larvae protein homolog 1 OS=Homo sapiens GN=LLGL1 PE=1 SV=3	109	Up in AD	0.281225	0.0863059	0.580736	Llgl1
FAH	sp|P16930|FAAA_HUMAN	Fumarylacetoacetase OS=Homo sapiens GN=FAH PE=1 SV=2	144	Up in AD	0.298167	0.0442952	0.603367	Fah
TMEM132E	sp|Q6IEE7|T132E_HUMAN	Transmembrane protein 132E OS=Homo sapiens GN=TMEM132E PE=1 SV=1	26	Up in AD	0.299521	0.00702017	0.605052	Tmem132e
GALM	sp|Q96C23|GALM_HUMAN	Aldose 1-epimerase OS=Homo sapiens GN=GALM PE=1 SV=1	88	Up in AD	0.309912	0.0200631	0.618886	Galm
VCAM1	sp|P19320|VCAM1_HUMAN	Vascular cell adhesion protein 1 OS=Homo sapiens GN=VCAM1 PE=1 SV=1	201	Up in AD	0.332425	0.0118386	0.652436	Vcam1
CLTB	sp|P09497-2|CLCB_HUMAN	Isoform Non-brain of Clathrin light chain B OS=Homo sapiens GN=CLTB	60	Up in AD	0.345685	0.0985432	0.668799	Cltb
BAG3	sp|O95817|BAG3_HUMAN	BAG family molecular chaperone regulator 3 OS=Homo sapiens GN=BAG3 PE=1 SV=3	119	Up in AD	0.364422	0.05293	0.692798	Bag3
SNCA	sp|P37840|SYUA_HUMAN	Alpha-synuclein OS=Homo sapiens GN=SNCA PE=1 SV=1	69	Up in AD	0.369793	0.0692608	0.699427	Snca
SNAP91	sp|O60641-3|AP180_HUMAN	Isoform 3 of Clathrin coat assembly protein AP180 OS=Homo sapiens GN=SNAP91	111	Up in AD	0.384591	0.0571582	0.715117	Snap91
STXBP3	sp|O00186|STXB3_HUMAN	Syntaxin-binding protein 3 OS=Homo sapiens GN=STXBP3 PE=1 SV=2	74	Up in AD	0.38594	0.0568527	0.716713	Stxbp3
RRAS	sp|P10301|RRAS_HUMAN	Ras-related protein R-Ras OS=Homo sapiens GN=RRAS PE=1 SV=1	38	Up in AD	0.391299	0.0499531	0.724189	Rras
PHYHD1	sp|Q5SRE7|PHYD1_HUMAN	Phytanoyl-CoA dioxygenase domain-containing protein 1 OS=Homo sapiens GN=PHYHD1 PE=1 SV=2	119	Up in AD	0.392513	0.0529087	0.725231	Phyhd1
JAK1	sp|P23458|JAK1_HUMAN	Tyrosine-protein kinase JAK1 OS=Homo sapiens GN=JAK1 PE=1 SV=2	30	Up in AD	0.401142	0.0296252	0.736896	Jak1
IRGQ	sp|Q8WZA9|IRGQ_HUMAN	Immunity-related GTPase family Q protein OS=Homo sapiens GN=IRGQ PE=1 SV=1	84	Up in AD	0.408755	0.0262098	0.746722	Irgq
TRIM25	sp|Q14258|TRI25_HUMAN	E3 ubiquitin/ISG15 ligase TRIM25 OS=Homo sapiens GN=TRIM25 PE=1 SV=2	78	Up in AD	0.414343	0.0509861	0.752763	Trim25
PPP3CB	sp|P16298|PP2BB_HUMAN	Serine/threonine-protein phosphatase 2B catalytic subunit beta isoform OS=Homo sapiens GN=PPP3CB PE=1 SV=2	124	Up in AD	0.414939	0.0250335	0.753385	Ppp3cb
PSME2	sp|Q9UL46|PSME2_HUMAN	Proteasome activator complex subunit 2 OS=Homo sapiens GN=PSME2 PE=1 SV=4	132	Up in AD	0.424835	0.0448081	0.765753	Psme2
PTBP1	sp|P26599|PTBP1_HUMAN	Polypyrimidine tract-binding protein 1 OS=Homo sapiens GN=PTBP1 PE=1 SV=1	61	Up in AD	0.493177	0.00358947	0.838613	Ptbp1
FARP1	sp|Q9Y4F1|FARP1_HUMAN	FERM, RhoGEF and pleckstrin domain-containing protein 1 OS=Homo sapiens GN=FARP1 PE=1 SV=1	39	Up in AD	0.495282	0.00201754	0.840159	Farp1
PLIN3	sp|O60664|PLIN3_HUMAN	Perilipin-3 OS=Homo sapiens GN=PLIN3 PE=1 SV=3	228	Up in AD	0.546528	0.00461881	0.892201	Plin3
GRN	sp|P28799|GRN_HUMAN	Granulins OS=Homo sapiens GN=GRN PE=1 SV=2	56	Up in AD	0.557658	0.0267924	0.904217	Grn
UNC5A	sp|Q6ZN44|UNC5A_HUMAN	Netrin receptor UNC5A OS=Homo sapiens GN=UNC5A PE=1 SV=3	9	Up in AD	0.579941	0.0174291	0.923149	Unc5a
CD47	sp|Q08722|CD47_HUMAN	Leukocyte surface antigen CD47 OS=Homo sapiens GN=CD47 PE=1 SV=1	26	Up in AD	0.601493	0.0175847	0.942302	Cd47
FLNC	sp|Q14315|FLNC_HUMAN	Filamin-C OS=Homo sapiens GN=FLNC PE=1 SV=3	401	Up in AD	0.706866	0.00937608	1	Flnc
CLU	sp|P10909|CLUS_HUMAN	Clusterin OS=Homo sapiens GN=CLU PE=1 SV=1	1585	Down in AD	0.717693	-0.0232624	1	Clu
PRRT3	sp|Q5FWE3|PRRT3_HUMAN	Proline-rich transmembrane protein 3 OS=Homo sapiens GN=PRRT3 PE=1 SV=3	91	Down in AD	0.528482	-0.0413437	1	Prrt3
GPRC5B	sp|Q9NZH0|GPC5B_HUMAN	G-protein coupled receptor family C group 5 member B OS=Homo sapiens GN=GPRC5B PE=2 SV=2	19	Down in AD	0.493782	-0.0582906	0.988063	Gprc5b
NFKB1	sp|P19838|NFKB1_HUMAN	Nuclear factor NF-kappa-B p105 subunit OS=Homo sapiens GN=NFKB1 PE=1 SV=2	33	Down in AD	0.486886	-0.00706472	0.980209	Nfkb1
ATP8A1	sp|Q9Y2Q0|AT8A1_HUMAN	Phospholipid-transporting ATPase IA OS=Homo sapiens GN=ATP8A1 PE=1 SV=1	42	Down in AD	0.472873	-0.017444	0.963306	Atp8a1
PPT1	sp|P50897|PPT1_HUMAN	Palmitoyl-protein thioesterase 1 OS=Homo sapiens GN=PPT1 PE=1 SV=1	74	Down in AD	0.46804	-0.0570094	0.959741	Ppt1
PPFIA3	sp|O75145|LIPA3_HUMAN	Liprin-alpha-3 OS=Homo sapiens GN=PPFIA3 PE=1 SV=3	16	Down in AD	0.444024	-0.0222037	0.929197	Ppfia3
NOTCH2	sp|Q04721|NOTC2_HUMAN	Neurogenic locus notch homolog protein 2 OS=Homo sapiens GN=NOTCH2 PE=1 SV=3	55	Down in AD	0.430885	-0.00488766	0.916557	Notch2
PSME1	sp|Q06323|PSME1_HUMAN	Proteasome activator complex subunit 1 OS=Homo sapiens GN=PSME1 PE=1 SV=1	158	Down in AD	0.412181	-0.0848862	0.894715	Psme1
RTN4RL2	sp|Q86UN3|R4RL2_HUMAN	Reticulon-4 receptor-like 2 OS=Homo sapiens GN=RTN4RL2 PE=1 SV=1	69	Down in AD	0.357733	-0.0691529	0.819351	Rtn4rl2
TPPP	sp|O94811|TPPP_HUMAN	Tubulin polymerization-promoting protein OS=Homo sapiens GN=TPPP PE=1 SV=1	77	Down in AD	0.351567	-0.0986936	0.813177	Tppp
CADM2	sp|Q8N3J6|CADM2_HUMAN	Cell adhesion molecule 2 OS=Homo sapiens GN=CADM2 PE=2 SV=1	93	Down in AD	0.349476	-0.0129023	0.810757	Cadm2
BRINP1	sp|O60477|BRNP1_HUMAN	BMP/retinoic acid-inducible neural-specific protein 1 OS=Homo sapiens GN=BRINP1 PE=1 SV=2	9	Down in AD	0.33451	-0.0375549	0.78884	Brinp1
CDH10	sp|Q9Y6N8|CAD10_HUMAN	Cadherin-10 OS=Homo sapiens GN=CDH10 PE=1 SV=2	35	Down in AD	0.332225	-0.0493597	0.785463	Cdh10
TRIM47	sp|Q96LD4|TRI47_HUMAN	Tripartite motif-containing protein 47 OS=Homo sapiens GN=TRIM47 PE=1 SV=2	23	Down in AD	0.328278	-0.0885562	0.77799	Trim47
TLN1	sp|Q9Y490|TLN1_HUMAN	Talin-1 OS=Homo sapiens GN=TLN1 PE=1 SV=3	1108	Down in AD	0.315446	-0.0351337	0.762314	Tln1
PNP	sp|P00491|PNPH_HUMAN	Purine nucleoside phosphorylase OS=Homo sapiens GN=PNP PE=1 SV=2	191	Down in AD	0.300572	-0.0903437	0.743792	Pnp
CD151	sp|P48509|CD151_HUMAN	CD151 antigen OS=Homo sapiens GN=CD151 PE=1 SV=3	14	Down in AD	0.296973	-0.12258	0.736483	Cd151
VWA5A	sp|O00534|VMA5A_HUMAN	von Willebrand factor A domain-containing protein 5A OS=Homo sapiens GN=VWA5A PE=2 SV=2	146	Down in AD	0.290869	-0.225542	0.727698	Vwa5a
ANXA5	sp|P08758|ANXA5_HUMAN	Annexin A5 OS=Homo sapiens GN=ANXA5 PE=1 SV=2	364	Down in AD	0.281021	-0.000760766	0.710152	Anxa5
NEK9	sp|Q8TD19|NEK9_HUMAN	Serine/threonine-protein kinase Nek9 OS=Homo sapiens GN=NEK9 PE=1 SV=2	82	Down in AD	0.277203	-0.171285	0.704154	Nek9
CAMK1D	sp|Q8IU85|KCC1D_HUMAN	Calcium/calmodulin-dependent protein kinase type 1D OS=Homo sapiens GN=CAMK1D PE=1 SV=1	47	Down in AD	0.276297	-0.0630203	0.703054	Camk1d
YOD1	sp|Q5VVQ6|OTU1_HUMAN	Ubiquitin thioesterase OTU1 OS=Homo sapiens GN=YOD1 PE=1 SV=1	22	Down in AD	0.270442	-0.0629368	0.694403	Yod1
FLNB	sp|O75369|FLNB_HUMAN	Filamin-B OS=Homo sapiens GN=FLNB PE=1 SV=2	886	Down in AD	0.26907	-0.128649	0.691777	Flnb
ADAM17	sp|P78536|ADA17_HUMAN	Disintegrin and metalloproteinase domain-containing protein 17 OS=Homo sapiens GN=ADAM17 PE=1 SV=1	55	Down in AD	0.256938	-0.0611472	0.6746	Adam17
NECAP2	sp|Q9NVZ3|NECP2_HUMAN	Adaptin ear-binding coat-associated protein 2 OS=Homo sapiens GN=NECAP2 PE=1 SV=1	52	Down in AD	0.255677	-0.160695	0.672458	Necap2
ATP6V0A1	sp|Q93050|VPP1_HUMAN	V-type proton ATPase 116 kDa subunit a isoform 1 OS=Homo sapiens GN=ATP6V0A1 PE=1 SV=3	102	Down in AD	0.243233	-0.138772	0.651878	Atp6v0a1
PCLO	sp|Q9Y6V0-5|PCLO_HUMAN	Isoform 5 of Protein piccolo OS=Homo sapiens GN=PCLO	34	Down in AD	0.240377	-0.0674935	0.648469	Pclo
F3	sp|P13726|TF_HUMAN	Tissue factor OS=Homo sapiens GN=F3 PE=1 SV=1	18	Down in AD	0.238169	-0.156008	0.64435	F3
EFEMP1	sp|Q12805|FBLN3_HUMAN	EGF-containing fibulin-like extracellular matrix protein 1 OS=Homo sapiens GN=EFEMP1 PE=1 SV=2	577	Down in AD	0.237001	-0.00115512	0.642131	Efemp1
ASS1	sp|P00966|ASSY_HUMAN	Argininosuccinate synthase OS=Homo sapiens GN=ASS1 PE=1 SV=2	277	Down in AD	0.213085	-0.14618	0.594974	Ass1
CAPG	sp|P40121|CAPG_HUMAN	Macrophage-capping protein OS=Homo sapiens GN=CAPG PE=1 SV=2	129	Down in AD	0.211901	-0.0421295	0.592505	Capg
FRMD8	sp|Q9BZ67|FRMD8_HUMAN	FERM domain-containing protein 8 OS=Homo sapiens GN=FRMD8 PE=1 SV=1	26	Down in AD	0.204924	-0.161628	0.578696	Frmd8
IQGAP1	sp|P46940|IQGA1_HUMAN	Ras GTPase-activating-like protein IQGAP1 OS=Homo sapiens GN=IQGAP1 PE=1 SV=1	642	Down in AD	0.203324	-0.00447869	0.575214	Iqgap1
PXN	sp|P49023|PAXI_HUMAN	Paxillin OS=Homo sapiens GN=PXN PE=1 SV=3	52	Down in AD	0.198129	-0.230944	0.567369	Pxn
ITGAX	sp|P20702|ITAX_HUMAN	Integrin alpha-X OS=Homo sapiens GN=ITGAX PE=1 SV=3	36	Down in AD	0.183619	-0.126556	0.538017	Itgax
SYNPO	sp|Q8N3V7|SYNPO_HUMAN	Synaptopodin OS=Homo sapiens GN=SYNPO PE=1 SV=2	40	Down in AD	0.183166	-0.289372	0.537196	Synpo
TPP1	sp|O14773|TPP1_HUMAN	Tripeptidyl-peptidase 1 OS=Homo sapiens GN=TPP1 PE=1 SV=2	220	Down in AD	0.182919	-0.041312	0.53714	Tpp1
PLTP	sp|P55058|PLTP_HUMAN	Phospholipid transfer protein OS=Homo sapiens GN=PLTP PE=1 SV=1	286	Down in AD	0.18238	-0.0539702	0.536748	Pltp
SLC1A3	sp|P43003|EAA1_HUMAN	Excitatory amino acid transporter 1 OS=Homo sapiens GN=SLC1A3 PE=1 SV=1	112	Down in AD	0.178122	-0.233387	0.527877	Slc1a3
PPP3CA	sp|Q08209-2|PP2BA_HUMAN	Isoform 2 of Serine/threonine-protein phosphatase 2B catalytic subunit alpha isoform OS=Homo sapiens GN=PPP3CA	197	Down in AD	0.171175	-0.077045	0.513437	Ppp3ca
RAPGEF2	sp|Q9Y4G8|RPGF2_HUMAN	Rap guanine nucleotide exchange factor 2 OS=Homo sapiens GN=RAPGEF2 PE=1 SV=1	11	Down in AD	0.163123	-0.117133	0.499632	Rapgef2
NTM	sp|Q9P121-4|NTRI_HUMAN	Isoform 4 of Neurotrimin OS=Homo sapiens GN=NTM	205	Down in AD	0.158157	-0.0449528	0.490499	Ntm
RAB31	sp|Q13636|RAB31_HUMAN	Ras-related protein Rab-31 OS=Homo sapiens GN=RAB31 PE=1 SV=1	20	Down in AD	0.155298	-0.175874	0.485005	Rab31
NCDN	sp|Q9UBB6|NCDN_HUMAN	Neurochondrin OS=Homo sapiens GN=NCDN PE=1 SV=1	126	Down in AD	0.152698	-0.21739	0.480844	Ncdn
ICAM1	sp|P05362|ICAM1_HUMAN	Intercellular adhesion molecule 1 OS=Homo sapiens GN=ICAM1 PE=1 SV=2	60	Down in AD	0.149083	-0.0707823	0.471963	Icam1
RAB3A	sp|P20336|RAB3A_HUMAN	Ras-related protein Rab-3A OS=Homo sapiens GN=RAB3A PE=1 SV=1	97	Down in AD	0.137186	-0.218123	0.44865	Rab3a
STX1A	sp|Q16623|STX1A_HUMAN	Syntaxin-1A OS=Homo sapiens GN=STX1A PE=1 SV=1	52	Down in AD	0.133336	-0.0702235	0.439202	Stx1a
GRIA2	sp|P42262|GRIA2_HUMAN	Glutamate receptor 2 OS=Homo sapiens GN=GRIA2 PE=1 SV=3	39	Down in AD	0.127683	-0.107326	0.425062	Gria2
ASTN1	sp|O14525|ASTN1_HUMAN	Astrotactin-1 OS=Homo sapiens GN=ASTN1 PE=2 SV=3	20	Down in AD	0.12266	-0.0574822	0.415513	Astn1
ADK	sp|P55263|ADK_HUMAN	Adenosine kinase OS=Homo sapiens GN=ADK PE=1 SV=2	140	Down in AD	0.120923	-0.163163	0.412498	Adk
APOE	sp|P02649|APOE_HUMAN	Apolipoprotein E OS=Homo sapiens GN=APOE PE=1 SV=1	2012	Down in AD	0.112915	-0.0780205	0.39395	Apoe
MYO9B	sp|Q13459|MYO9B_HUMAN	Unconventional myosin-IXb OS=Homo sapiens GN=MYO9B PE=1 SV=3	9	Down in AD	0.110212	-0.403433	0.387767	Myo9b
SYT1	sp|P21579|SYT1_HUMAN	Synaptotagmin-1 OS=Homo sapiens GN=SYT1 PE=1 SV=1	93	Down in AD	0.108909	-0.110495	0.384779	Syt1
THY1	sp|P04216|THY1_HUMAN	Thy-1 membrane glycoprotein OS=Homo sapiens GN=THY1 PE=1 SV=2	128	Down in AD	0.107988	-0.0753997	0.383242	Thy1
BLVRB	sp|P30043|BLVRB_HUMAN	Flavin reductase (NADPH) OS=Homo sapiens GN=BLVRB PE=1 SV=3	221	Down in AD	0.106271	-0.24539	0.378839	Blvrb
IFI35	sp|P80217|IN35_HUMAN	Interferon-induced 35 kDa protein OS=Homo sapiens GN=IFI35 PE=1 SV=5	24	Down in AD	0.1054	-0.312342	0.376186	Ifi35
FABP7	sp|O15540|FABP7_HUMAN	Fatty acid-binding protein, brain OS=Homo sapiens GN=FABP7 PE=1 SV=3	121	Down in AD	0.103036	-0.321904	0.36997	Fabp7
STAT3	sp|P40763|STAT3_HUMAN	Signal transducer and activator of transcription 3 OS=Homo sapiens GN=STAT3 PE=1 SV=2	69	Down in AD	0.0970151	-0.444885	0.356932	Stat3
EPB41L2	sp|O43491|E41L2_HUMAN	Band 4.1-like protein 2 OS=Homo sapiens GN=EPB41L2 PE=1 SV=1	296	Down in AD	0.0862123	-0.25033	0.327794	Epb41l2
CACNA2D1	sp|P54289-2|CA2D1_HUMAN	Isoform 2 of Voltage-dependent calcium channel subunit alpha-2/delta-1 OS=Homo sapiens GN=CACNA2D1	318	Down in AD	0.079299	-0.0544613	0.30984	Cacna2d1
PLCD1	sp|P51178|PLCD1_HUMAN	1-phosphatidylinositol 4,5-bisphosphate phosphodiesterase delta-1 OS=Homo sapiens GN=PLCD1 PE=1 SV=2	198	Down in AD	0.0771046	-0.313401	0.304216	Plcd1
BMP2K	sp|Q9NSY1|BMP2K_HUMAN	BMP-2-inducible protein kinase OS=Homo sapiens GN=BMP2K PE=1 SV=2	17	Down in AD	0.0762757	-0.301542	0.302606	Bmp2k
NAPB	sp|Q9H115|SNAB_HUMAN	Beta-soluble NSF attachment protein OS=Homo sapiens GN=NAPB PE=1 SV=2	75	Down in AD	0.0734413	-0.186613	0.296522	Napb
PADI2	sp|Q9Y2J8|PADI2_HUMAN	Protein-arginine deiminase type-2 OS=Homo sapiens GN=PADI2 PE=1 SV=2	111	Down in AD	0.073428	-0.689039	0.296522	Padi2
AIF1	sp|P55008|AIF1_HUMAN	Allograft inflammatory factor 1 OS=Homo sapiens GN=AIF1 PE=1 SV=1	46	Down in AD	0.0730133	-0.315533	0.295587	Aif1
LGI4	sp|Q8N135|LGI4_HUMAN	Leucine-rich repeat LGI family member 4 OS=Homo sapiens GN=LGI4 PE=2 SV=1	9	Down in AD	0.0681504	-0.300712	0.282197	Lgi4
MYH14	sp|Q7Z406|MYH14_HUMAN	Myosin-14 OS=Homo sapiens GN=MYH14 PE=1 SV=2	151	Down in AD	0.0656813	-0.354025	0.276457	Myh14
LGALS9	sp|O00182|LEG9_HUMAN	Galectin-9 OS=Homo sapiens GN=LGALS9 PE=1 SV=2	13	Down in AD	0.0608952	-0.426942	0.260936	Lgals9
HMGCS1	sp|Q01581|HMCS1_HUMAN	Hydroxymethylglutaryl-CoA synthase, cytoplasmic OS=Homo sapiens GN=HMGCS1 PE=1 SV=2	37	Down in AD	0.0595365	-0.744713	0.257905	Hmgcs1
NDEL1	sp|Q9GZM8|NDEL1_HUMAN	Nuclear distribution protein nudE-like 1 OS=Homo sapiens GN=NDEL1 PE=1 SV=1	13	Down in AD	0.0575325	-0.188029	0.252901	Ndel1
CSRP1	sp|P21291|CSRP1_HUMAN	Cysteine and glycine-rich protein 1 OS=Homo sapiens GN=CSRP1 PE=1 SV=3	178	Down in AD	0.0558124	-0.119621	0.246997	Csrp1
PLXNB3	sp|Q9ULL4|PLXB3_HUMAN	Plexin-B3 OS=Homo sapiens GN=PLXNB3 PE=1 SV=2	69	Down in AD	0.0552083	-0.00353851	0.245054	Plxnb3
DOCK2	sp|Q92608|DOCK2_HUMAN	Dedicator of cytokinesis protein 2 OS=Homo sapiens GN=DOCK2 PE=1 SV=2	20	Down in AD	0.0547875	-0.584039	0.24361	Dock2
ARPC1B	sp|O15143|ARC1B_HUMAN	Actin-related protein 2/3 complex subunit 1B OS=Homo sapiens GN=ARPC1B PE=1 SV=3	56	Down in AD	0.050764	-0.774869	0.232196	Arpc1b
SPARC	sp|P09486|SPRC_HUMAN	SPARC OS=Homo sapiens GN=SPARC PE=1 SV=1	292	Down in AD	0.0498996	-0.0109168	0.230267	Sparc
LIMS1	sp|P48059-3|LIMS1_HUMAN	Isoform 3 of LIM and senescent cell antigen-like-containing domain protein 1 OS=Homo sapiens GN=LIMS1	78	Down in AD	0.049818	-0.493856	0.230069	Lims1
SH3GL1	sp|Q99961|SH3G1_HUMAN	Endophilin-A2 OS=Homo sapiens GN=SH3GL1 PE=1 SV=1	79	Down in AD	0.0486551	-0.591009	0.22646	Sh3gl1
ERC2	sp|O15083|ERC2_HUMAN	ERC protein 2 OS=Homo sapiens GN=ERC2 PE=1 SV=3	12	Down in AD	0.0473467	-0.365304	0.222286	Erc2
SLC25A22	sp|Q9H936|GHC1_HUMAN	Mitochondrial glutamate carrier 1 OS=Homo sapiens GN=SLC25A22 PE=1 SV=1	46	Down in AD	0.0470654	-0.63963	0.221141	Slc25a22
EFNB1	sp|P98172|EFNB1_HUMAN	Ephrin-B1 OS=Homo sapiens GN=EFNB1 PE=1 SV=1	48	Down in AD	0.0454892	-0.18202	0.215968	Efnb1
NRN1	sp|Q9NPD7|NRN1_HUMAN	Neuritin OS=Homo sapiens GN=NRN1 PE=2 SV=1	27	Down in AD	0.0437017	-0.0977264	0.209237	Nrn1
ATP6V1G2	sp|O95670|VATG2_HUMAN	V-type proton ATPase subunit G 2 OS=Homo sapiens GN=ATP6V1G2 PE=2 SV=1	25	Down in AD	0.0424769	-0.31622	0.205006	Atp6v1g2
NUMBL	sp|Q9Y6R0|NUMBL_HUMAN	Numb-like protein OS=Homo sapiens GN=NUMBL PE=1 SV=1	17	Down in AD	0.0415892	-0.25764	0.202289	Numbl
S100B	sp|P04271|S100B_HUMAN	Protein S100-B OS=Homo sapiens GN=S100B PE=1 SV=2	220	Down in AD	0.0414918	-0.0768591	0.202289	S100b
ILK	sp|Q13418|ILK_HUMAN	Integrin-linked protein kinase OS=Homo sapiens GN=ILK PE=1 SV=2	83	Down in AD	0.0393976	-0.583708	0.195801	Ilk
ITGB1	sp|P05556|ITB1_HUMAN	Integrin beta-1 OS=Homo sapiens GN=ITGB1 PE=1 SV=2	102	Down in AD	0.038658	-0.0241996	0.193747	Itgb1
TNS3	sp|Q68CZ2|TENS3_HUMAN	Tensin-3 OS=Homo sapiens GN=TNS3 PE=1 SV=2	43	Down in AD	0.0383338	-0.625752	0.192773	Tns3
SERPINH1	sp|P50454|SERPH_HUMAN	Serpin H1 OS=Homo sapiens GN=SERPINH1 PE=1 SV=2	27	Down in AD	0.0370192	-1.28733	0.187912	Serpinh1
CPNE6	sp|O95741|CPNE6_HUMAN	Copine-6 OS=Homo sapiens GN=CPNE6 PE=1 SV=3	45	Down in AD	0.0339395	-0.756068	0.176968	Cpne6
PTPN6	sp|P29350|PTN6_HUMAN	Tyrosine-protein phosphatase non-receptor type 6 OS=Homo sapiens GN=PTPN6 PE=1 SV=1	35	Down in AD	0.0331917	-0.453886	0.176005	Ptpn6
GALK1	sp|P51570|GALK1_HUMAN	Galactokinase OS=Homo sapiens GN=GALK1 PE=1 SV=1	91	Down in AD	0.03112	-0.329224	0.16802	Galk1
MYO1C	sp|O00159|MYO1C_HUMAN	Unconventional myosin-Ic OS=Homo sapiens GN=MYO1C PE=1 SV=4	96	Down in AD	0.0299417	-0.759828	0.163591	Myo1c
CTSD	sp|P07339|CATD_HUMAN	Cathepsin D OS=Homo sapiens GN=CTSD PE=1 SV=1	683	Down in AD	0.028731	-0.0814471	0.159919	Ctsd
GBP1	sp|P32455|GBP1_HUMAN	Guanylate-binding protein 1 OS=Homo sapiens GN=GBP1 PE=1 SV=2	93	Down in AD	0.0272273	-0.864353	0.15415	Gbp2b
PHF24	sp|Q9UPV7|PHF24_HUMAN	PHD finger protein 24 OS=Homo sapiens GN=PHF24 PE=1 SV=2	20	Down in AD	0.0233029	-0.556025	0.140195	Phf24
MAVS	sp|Q7Z434|MAVS_HUMAN	Mitochondrial antiviral-signaling protein OS=Homo sapiens GN=MAVS PE=1 SV=2	26	Down in AD	0.0222574	-0.395299	0.136275	Mavs
PIP5K1C	sp|O60331|PI51C_HUMAN	Phosphatidylinositol 4-phosphate 5-kinase type-1 gamma OS=Homo sapiens GN=PIP5K1C PE=1 SV=2	22	Down in AD	0.0220272	-0.321836	0.135564	Pip5k1c
ALDH1L1	sp|O75891|AL1L1_HUMAN	Cytosolic 10-formyltetrahydrofolate dehydrogenase OS=Homo sapiens GN=ALDH1L1 PE=1 SV=2	502	Down in AD	0.021924	-0.620142	0.135189	Aldh1l1
PALLD	sp|Q8WX93|PALLD_HUMAN	Palladin OS=Homo sapiens GN=PALLD PE=1 SV=3	35	Down in AD	0.0195539	-0.54309	0.125515	Palld
NPL	sp|Q9BXD5|NPL_HUMAN	N-acetylneuraminate lyase OS=Homo sapiens GN=NPL PE=1 SV=1	15	Down in AD	0.0195214	-0.798277	0.125473	Npl
ABI3	sp|Q9P2A4|ABI3_HUMAN	ABI gene family member 3 OS=Homo sapiens GN=ABI3 PE=1 SV=2	12	Down in AD	0.018576	-0.44859	0.121234	Abi3
NAPG	sp|Q99747|SNAG_HUMAN	Gamma-soluble NSF attachment protein OS=Homo sapiens GN=NAPG PE=1 SV=1	48	Down in AD	0.0181043	-0.577146	0.11894	Napg
SLC7A11	sp|Q9UPY5|XCT_HUMAN	Cystine/glutamate transporter OS=Homo sapiens GN=SLC7A11 PE=1 SV=1	14	Down in AD	0.0173079	-0.852717	0.11665	Slc7a11
NCKAP1L	sp|P55160|NCKPL_HUMAN	Nck-associated protein 1-like OS=Homo sapiens GN=NCKAP1L PE=1 SV=3	42	Down in AD	0.0172766	-0.655514	0.116598	Nckap1l
SHISA7	sp|A6NL88|SHSA7_HUMAN	Protein shisa-7 OS=Homo sapiens GN=SHISA7 PE=2 SV=3	11	Down in AD	0.0154135	-0.0661214	0.10963	Shisa7
SELENBP1	sp|Q13228|SBP1_HUMAN	Selenium-binding protein 1 OS=Homo sapiens GN=SELENBP1 PE=1 SV=2	607	Down in AD	0.0146336	-0.025582	0.106246	Selenbp1
FERMT3	sp|Q86UX7|URP2_HUMAN	Fermitin family homolog 3 OS=Homo sapiens GN=FERMT3 PE=1 SV=1	50	Down in AD	0.0126319	-1.35748	0.0979231	Fermt3
MAOB	sp|P27338|AOFB_HUMAN	Amine oxidase [flavin-containing] B OS=Homo sapiens GN=MAOB PE=1 SV=3	106	Down in AD	0.0125072	-0.817763	0.0973119	Maob
RENBP	sp|P51606|RENBP_HUMAN	N-acylglucosamine 2-epimerase OS=Homo sapiens GN=RENBP PE=1 SV=2	38	Down in AD	0.0120481	-1.00584	0.0954045	Renbp
IGSF21	sp|Q96ID5|IGS21_HUMAN	Immunoglobulin superfamily member 21 OS=Homo sapiens GN=IGSF21 PE=2 SV=1	52	Down in AD	0.0109049	-0.122595	0.0895299	Igsf21
SAMHD1	sp|Q9Y3Z3|SAMH1_HUMAN	Deoxynucleoside triphosphate triphosphohydrolase SAMHD1 OS=Homo sapiens GN=SAMHD1 PE=1 SV=2	89	Down in AD	0.0108609	-1.01438	0.0895299	Samhd1
CAPN2	sp|P17655|CAN2_HUMAN	Calpain-2 catalytic subunit OS=Homo sapiens GN=CAPN2 PE=1 SV=6	188	Down in AD	0.0107933	-0.145492	0.0895153	Capn2
TJP2	sp|Q9UDY2-6|ZO2_HUMAN	Isoform 6 of Tight junction protein ZO-2 OS=Homo sapiens GN=TJP2	62	Down in AD	0.010189	-0.562936	0.0874461	Tjp2
ITPR2	sp|Q14571|ITPR2_HUMAN	Inositol 1,4,5-trisphosphate receptor type 2 OS=Homo sapiens GN=ITPR2 PE=1 SV=2	16	Down in AD	0.0101826	-0.282368	0.0874461	Itpr2
PLEK	sp|P08567|PLEK_HUMAN	Pleckstrin OS=Homo sapiens GN=PLEK PE=1 SV=3	14	Down in AD	0.00975917	-1.18933	0.0848605	Plek
ALDH1L2	sp|Q3SY69|AL1L2_HUMAN	Mitochondrial 10-formyltetrahydrofolate dehydrogenase OS=Homo sapiens GN=ALDH1L2 PE=1 SV=2	77	Down in AD	0.00921006	-0.644114	0.0814105	Aldh1l2
AK2	sp|P54819|KAD2_HUMAN	Adenylate kinase 2, mitochondrial OS=Homo sapiens GN=AK2 PE=1 SV=2	48	Down in AD	0.00913039	-0.0296778	0.0810592	Ak2
RTF1	sp|Q92541|RTF1_HUMAN	RNA polymerase-associated protein RTF1 homolog OS=Homo sapiens GN=RTF1 PE=1 SV=4	18	Down in AD	0.00738892	-0.254663	0.0700685	Rtf1
ACSF2	sp|Q96CM8|ACSF2_HUMAN	Acyl-CoA synthetase family member 2, mitochondrial OS=Homo sapiens GN=ACSF2 PE=1 SV=2	22	Down in AD	0.00668501	-0.848781	0.0661292	Acsf2
SORBS3	sp|O60504|VINEX_HUMAN	Vinexin OS=Homo sapiens GN=SORBS3 PE=1 SV=2	20	Down in AD	0.00657112	-0.956549	0.0658109	Sorbs3
ACADL	sp|P28330|ACADL_HUMAN	Long-chain specific acyl-CoA dehydrogenase, mitochondrial OS=Homo sapiens GN=ACADL PE=1 SV=2	22	Down in AD	0.00638317	-0.728087	0.0648675	Acadl
PGM5	sp|Q15124|PGM5_HUMAN	Phosphoglucomutase-like protein 5 OS=Homo sapiens GN=PGM5 PE=1 SV=2	53	Down in AD	0.0061883	-0.467481	0.0641402	Pgm5
GPT2	sp|Q8TD30|ALAT2_HUMAN	Alanine aminotransferase 2 OS=Homo sapiens GN=GPT2 PE=1 SV=1	14	Down in AD	0.00585934	-0.601056	0.0619193	Gpt2
ARHGDIB	sp|P52566|GDIR2_HUMAN	Rho GDP-dissociation inhibitor 2 OS=Homo sapiens GN=ARHGDIB PE=1 SV=3	82	Down in AD	0.0056885	-0.121361	0.0610923	Arhgdib
PTGS1	sp|P23219|PGH1_HUMAN	Prostaglandin G/H synthase 1 OS=Homo sapiens GN=PTGS1 PE=1 SV=2	7	Down in AD	0.00511167	-0.344127	0.0579355	Ptgs1
LPCAT2	sp|Q7L5N7|PCAT2_HUMAN	Lysophosphatidylcholine acyltransferase 2 OS=Homo sapiens GN=LPCAT2 PE=1 SV=1	11	Down in AD	0.00407023	-0.627918	0.0494557	Lpcat2
NEGR1	sp|Q7Z3B1|NEGR1_HUMAN	Neuronal growth regulator 1 OS=Homo sapiens GN=NEGR1 PE=1 SV=3	167	Down in AD	0.00380874	-0.112958	0.0476213	Negr1
S100A11	sp|P31949|S10AB_HUMAN	Protein S100-A11 OS=Homo sapiens GN=S100A11 PE=1 SV=2	51	Down in AD	0.00377282	-0.152645	0.0472716	S100a11
HADHA	sp|P40939|ECHA_HUMAN	Trifunctional enzyme subunit alpha, mitochondrial OS=Homo sapiens GN=HADHA PE=1 SV=2	133	Down in AD	0.00325494	-1.20249	0.0436267	Hadha
HADHB	sp|P55084|ECHB_HUMAN	Trifunctional enzyme subunit beta, mitochondrial OS=Homo sapiens GN=HADHB PE=1 SV=3	90	Down in AD	0.00258065	-1.09284	0.0383162	Hadhb
NDUFA4	sp|O00483|NDUA4_HUMAN	Cytochrome c oxidase subunit NDUFA4 OS=Homo sapiens GN=NDUFA4 PE=1 SV=1	26	Down in AD	0.0023924	-0.611273	0.036432	Ndufa4
NPC2	sp|P61916|NPC2_HUMAN	Epididymal secretory protein E1 OS=Homo sapiens GN=NPC2 PE=1 SV=1	280	Down in AD	0.00228618	-0.0496716	0.0354508	Npc2
IDH2	sp|P48735|IDHP_HUMAN	Isocitrate dehydrogenase [NADP], mitochondrial OS=Homo sapiens GN=IDH2 PE=1 SV=2	172	Down in AD	0.0015513	-0.599078	0.0274201	Idh2
PARD3	sp|Q8TEW0|PARD3_HUMAN	Partitioning defective 3 homolog OS=Homo sapiens GN=PARD3 PE=1 SV=2	13	Down in AD	0.00127414	-0.455383	0.0243029	Pard3
LCP1	sp|P13796|PLSL_HUMAN	Plastin-2 OS=Homo sapiens GN=LCP1 PE=1 SV=6	236	Down in AD	0.00100619	-0.164649	0.0210496	Lcp1
GSN	sp|P06396|GELS_HUMAN	Gelsolin OS=Homo sapiens GN=GSN PE=1 SV=1	1806	Down in AD	0.000957764	-0.120296	0.0202426	Gsn
RPH3A	sp|Q9Y2J0|RP3A_HUMAN	Rabphilin-3A OS=Homo sapiens GN=RPH3A PE=1 SV=1	30	Down in AD	0.000576657	-0.562608	0.0153577	Rph3a
GAP43	sp|P17677|NEUM_HUMAN	Neuromodulin OS=Homo sapiens GN=GAP43 PE=1 SV=1	147	Down in AD	0.000567965	-0.452816	0.0153091	Gap43
SUCLG2	sp|Q96I99|SUCB2_HUMAN	Succinate--CoA ligase [GDP-forming] subunit beta, mitochondrial OS=Homo sapiens GN=SUCLG2 PE=1 SV=2	59	Down in AD	0.000541368	-1.31378	0.0150948	Suclg2
ERBIN	sp|Q96RT1|ERBIN_HUMAN	Erbin OS=Homo sapiens GN=ERBIN PE=1 SV=2	19	Down in AD	0.000339415	-0.360811	0.0114291	Erbin
LGALS3	sp|P17931|LEG3_HUMAN	Galectin-3 OS=Homo sapiens GN=LGALS3 PE=1 SV=5	111	Down in AD	0.000219415	-0.0951812	0.00889237	Lgals3
RRBP1	sp|Q9P2E9|RRBP1_HUMAN	Ribosome-binding protein 1 OS=Homo sapiens GN=RRBP1 PE=1 SV=4	318	Down in AD	0.000161204	-0.29891	0.00725297	Rrbp1
QKI	sp|Q96PU8|QKI_HUMAN	Protein quaking OS=Homo sapiens GN=QKI PE=1 SV=1	33	Down in AD	6.6165e-05	-0.59786	0.00424166	Qki
AASS	sp|Q9UDR5|AASS_HUMAN	Alpha-aminoadipic semialdehyde synthase, mitochondrial OS=Homo sapiens GN=AASS PE=1 SV=1	55	Down in AD	1.14e-05	-1.10747	0.00137842	Aass
