# Supplementary material for: PKD1-tau disulfide linkage promotes tau phosphorylation and tau accumulation in a tauopathy mouse model
Source: Research Square preprint supplement (doi:10.21203/rs.3.rs-7655539/v1), 2025-10-13
Supplement: Supplementary file 7 [file ea638566fbdd5301cb20dd39.xlsx]

## Sheet: Table S3
GO	Description	LogP_PS19.PKD1-/-_vs_PS19.PKD1+/+	LogP_PS19.PKD1-/-_vs_PKD1+/+	LogP_PS19.PKD1+/+_vs_PKD1+/+	LogP	Log(q-value)	Genes	Symbols	InTerm_InList
GO:0050808	synapse organization	-23.3452	-4.62298	-33.6509	-34.8854	-30.6247	11352,11418,11487,11816,11840,11941,12217,12259,12260,12262,12266,12295,12296,12297,12298,12300,12386,12488,12565,12647,12891,13043,13051,13169,13641,13642,13838,13839,13844,14394,14395,14401,14402,14735,14799,14811,14824,16180,16409,16412,16779,17762,17920,18164,18186,18191,18213,19024,19141,19164,19268,19280,19339,19894,20404,20617,20964,21923,22350,26422,26875,50997,54725,56747,67453,72333,743…	Abl2,Asic2,Adam10,Apoe,Arf1,Atp2b2,Bsn,C1qa,C1qb,C1qc,C3,Cacnb1,Cacnb2,Cacnb3,Cacnb4,Cacng2,Ctnna2,Cd2ap,Cdh9,Chat,Cpne6,Cttn,Cx3cr1,Dbnl,Efnb1,Efnb2,Epha4,Epha5,Ephb2,Gabra1,Gabra2,Gabrb2,Gabrb3,Gpc4,Gria1,Grin2a,Grn,Il1rap,Itgam,Itgb1,Lamb2,Mapt,Myo6,Nptx1,Nrp1,Nrxn3,Ntrk3,Ppfibp2,Lgmn,Psen1,Ptprf,Ptprs,Rab3a,Rph3a,Sh3gl2,Snca,Syn1,Tnc,Ezr,Nbea,Pclo,Mpp2,Cadm1,Sez6l,Slc25a46,Palld,Lrrtm1,Ppfia3…	145/-
GO:0120035	regulation of plasma membrane bounded cell projection organization	-22.8359	-4.31498	-26.3922	-29.2353	-25.4517	11352,11487,11491,11512,11606,11816,11838,11881,11932,12010,12305,12323,12345,12386,12492,12494,12505,12803,12904,13047,13131,13132,13169,13176,13430,13642,13643,13803,13838,13841,13844,14130,14182,14226,14268,14297,14299,14348,14432,14580,14745,14824,14964,14972,15507,15894,16202,16332,16403,16412,16570,16852,17096,17118,17196,17751,17756,17758,17762,18186,18213,18223,18439,18606,18753,18761,188…	Abl2,Adam10,Adam17,Adcy6,Agt,Apoe,Arc,Arsb,Atp1b2,B2m,Ddr1,Camk2b,Capzb,Ctnna2,Scarb2,Cd38,Cd44,Cntf,Crabp2,Cux1,Dab1,Dab2,Dbnl,Dcc,Dnm2,Efnb2,Efnb3,Enc1,Epha4,Epha7,Ephb2,Fcgr2b,Fgfr1,Fkbp1b,Fn1,Fxn,Ncs1,Fut9,Gap43,Gfap,Lpar1,Grn,H2-D1,H2-K1,Hspb1,Icam1,Ilk,Inppl1,Itga6,Itgb1,Kif3c,Lgals1,Lyn,Marcks,Mbp,Mt3,Map2,Map4,Mapt,Nrp1,Ntrk3,Numbl,P2rx7,Enpp2,Prkcd,Prkcq,Pld1,Plxna1,Ppp3ca,Psen1,Ptbp1,Pt…	242/-
GO:0031345	negative regulation of cell projection organization	-14.2602	-4.30914	-14.3068	-15.9971	-13.1477	11491,11512,11816,12010,12345,12494,13131,13132,13430,13642,13643,13838,13841,13844,14580,14745,14964,14972,16332,16412,16852,17196,17751,17756,17758,18186,18753,19055,19164,19268,19280,20562,20563,20745,21838,22068,22241,22352,22601,22629,23991,63873,65079,66610,76089,76893,94175,140571,192176,214968,216049,216363,216616,226422,235106,236576,237847,239667,240057,245537,269295,270120,11421,11739,…	Adam17,Adcy6,Apoe,B2m,Capzb,Cd38,Dab1,Dab2,Dnm2,Efnb2,Efnb3,Epha4,Epha7,Ephb2,Gfap,Lpar1,H2-D1,H2-K1,Inppl1,Itgb1,Lgals1,Mbp,Mt3,Map2,Map4,Nrp1,Prkcd,Ppp3ca,Psen1,Ptprf,Ptprs,Slit1,Slit2,Spock1,Thy1,Trpc6,Ulk1,Vim,Yap1,Ywhah,Cib1,Trpv4,Rtn4r,Abi3,Rapgef2,Cers2,Hrg,Plxnb3,Flna,Sema6d,Zfp365,Rab3ip,Efemp1,Rab29,Ntm,Spry3,Rtn4rl1,Dip2b,Syngap1,Nlgn3,Rtn4rl2,Fat3,Ace,Slc25a4,Apoa1,Apoa4,Apod,Bak1,Cap…	173/-
R-MMU-6798695	Neutrophil degranulation	-16.3335	-2.07273	-13.8106	-16.3335	-13.641	11487,11717,11758,11772,11975,11980,11984,12010,12306,12475,12505,12512,13010,13032,13033,13036,13040,13136,13830,14127,14130,14824,14972,15170,15212,15439,16411,16414,16423,18033,18600,18753,18950,19264,19339,19340,20195,20619,21648,24088,26364,26416,26949,27357,29875,52120,56212,64138,66681,66824,67689,67963,69146,69981,70568,70719,72042,72512,78388,94176,102595,105722,105855,106572,208795,2173…	Adam10,Ampd3,Prdx6,Ap2a2,Atp6v0a1,Atp8a1,Atp6v0c,B2m,Anxa2,Cd14,Cd44,Cd63,Cst3,Ctsc,Ctsd,Ctsh,Ctss,Cd55,Stom,Fcer1g,Fcgr2b,Grn,H2-K1,Ptpn6,Hexb,Hp,Itgax,Itgb2,Cd47,Nfkb1,Padi2,Prkcd,Pnp,Ptprc,Rab3a,Rab3d,S100a11,Snap23,Dynlt1b,Tlr2,Adgre5,Mapk14,Vat1,Gyg1,Iqgap1,Hgsnat,Rhog,Ctsz,Pgm2,Pycard,Aldh3b1,Npc2,Gsdmd,Tmem30a,Cpne3,Arhgap45,Cotl1,Sting1,Mvp,Dock2,Plekho2,Ano6,Nckap1l,Rab31,Tmem63a,Tmc6,Na…	71/-
R-MMU-556833	Metabolism of lipids	-14.7328	-3.26435	-11.9154	-15.7068	-12.9375	11363,11364,11370,11409,11430,11657,11690,11840,11881,11886,12140,12891,12894,12896,13121,13124,13167,13360,13479,13850,14073,14137,14148,14187,14421,14473,14593,14732,14775,14792,15107,15211,15212,15483,15488,16331,16332,16922,17113,17772,17850,17855,18707,18717,18719,18806,19063,19215,19224,20397,20598,22239,23887,23986,26879,26897,28042,52123,56018,56348,56473,56794,57357,59045,66234,66427,665…	Acadl,Acadm,Acadvl,Acads,Acox1,Alb,Alox5ap,Arf1,Arsb,Asah1,Fabp7,Cpne6,Cpt1a,Cpt2,Cyp51,Cyp8b1,Dbi,Dhcr7,Dpep1,Ephx2,Faah,Fdft1,Fdx1,Akr1b8,B4galnt1,Gc,Ggps1,Gpam,Gpx1,Lpcat3,Hadh,Hexa,Hexb,Hsd11b1,Hsd17b4,Inpp5d,Inppl1,Phyh,M6pr,Mtm1,Mmut,Mvk,Pik3cd,Pip5k1c,Pip5k1b,Pld2,Ppt1,Ptgds,Ptgs1,Sgpl1,Smpd2,Ugt8a,Ggt5,Eci2,B3galnt1,Acot1,Selenoi,Agpat5,Stard10,Hsd17b12,Fads2,Hacl1,Srd5a3,Stard3,Msmo1,Cyb…	168/-
GO:0030029	actin filament-based process	-16.423	-2.30594	-21.4845	-24.532	-21.1744	11352,11629,11840,11867,12043,12288,12293,12296,12332,12345,12488,12797,12891,13007,13043,13169,13430,13821,13822,16332,16412,16419,16456,16653,16691,16897,16952,17118,17880,17886,17913,17920,17925,17974,18826,19229,19317,19354,20404,20739,20928,21346,21872,21894,22004,22323,22350,23790,23969,29875,30785,30794,50768,50932,53318,54418,56193,56212,56376,57342,63873,65970,66713,67199,67399,67803,680…	Abl2,Aif1,Arf1,Arpc1b,Bcl2,Cacna1c,Cacna2d1,Cacnb2,Capg,Capzb,Cd2ap,Cnn1,Cpne6,Csrp1,Cttn,Dbnl,Dnm2,Epb41l1,Epb41l2,Inppl1,Itgb1,Itgb5,F11r,Kras,Krt8,Llgl1,Anxa1,Marcks,Myh11,Myh9,Myo1c,Myo6,Myo9b,Nck2,Lcp1,Ptk2b,Qki,Rac2,Sh3gl2,Spta1,Abcc9,Tagln2,Tjp1,Tln1,Tpm2,Vasp,Ezr,Coro1c,Pacsin1,Iqgap1,Cttnbp2,Pdlim4,Dlc1,Mink1,Pdlim3,Fmn2,Plek,Rhog,Pdlim5,Parva,Trpv4,Lima1,Actr2,Pfdn1,Pdlim7,Limd2,Arpc4,C…	165/-
GO:0034220	monoatomic ion transmembrane transport	-6.69327	-2.45602	-16.2908	-16.2908	-13.6099	11418,11931,11933,11941,11946,11957,11958,11975,11984,12018,12043,12288,12290,12293,12294,12295,12296,12297,12298,12300,12724,13483,13618,14226,14297,14394,14395,14401,14402,14403,14799,14800,14802,14806,14809,14977,16439,16485,16498,16502,16504,16510,16513,16520,16531,17706,18115,18439,18797,18799,19264,20273,20496,20512,20533,20928,22063,22068,22784,28080,28240,29876,53623,54376,54403,55991,563…	Asic2,Atp1b1,Atp1b3,Atp2b2,Atp5f1a,Atp5pf,Atp5me,Atp6v0a1,Atp6v0c,Bak1,Bcl2,Cacna1c,Cacna1e,Cacna2d1,Cacna2d3,Cacnb1,Cacnb2,Cacnb3,Cacnb4,Cacng2,Clcn2,Dpp6,Ednrb,Fkbp1b,Fxn,Gabra1,Gabra2,Gabrb2,Gabrb3,Gabrd,Gria1,Gria2,Gria4,Grik2,Grik5,Slc39a7,Itpr2,Kcna1,Kcnab2,Kcnc1,Kcnc3,Kcnh1,Kcnj10,Kcnj4,Kcnma1,ATP8,Nnt,P2rx7,Plcb3,Plcd1,Ptprc,Scn8a,Slc12a2,Slc1a3,Slc4a1,Abcc9,Trpc1,Trpc6,Slc30a3,Atp5po,Trp…	213/-
GO:0098609	cell-cell adhesion	-18.9689	0	-18.9065	-19.4524	-16.4927	11352,11808,11829,11899,11932,12043,12304,12385,12386,12488,12505,12552,12564,12565,12628,12737,13051,13131,13176,13649,14735,15170,15894,16180,16403,16404,16409,16411,16412,16414,16419,16423,16456,16852,16859,17470,17528,17698,17886,18133,18530,18613,18717,19164,19264,19268,19280,19354,19876,20201,20563,20912,21825,21828,21838,21872,21873,21894,22329,22330,23959,26570,54725,56079,56193,56741,573…	Abl2,Apoa4,Aqp4,Astn1,Atp1b2,Bcl2,Pdia4,Ctnna1,Ctnna2,Cd2ap,Cd44,Cdh11,Cdh8,Cdh9,Cfh,Cldn1,Cx3cr1,Dab1,Dcc,Egfr,Gpc4,Ptpn6,Icam1,Il1rap,Itga6,Itga7,Itgam,Itgax,Itgb1,Itgb2,Itgb5,Cd47,F11r,Lgals1,Lgals9,Cd200,Mpz,Msn,Myh9,Ccn3,Pcdh8,Pecam1,Pip5k1c,Psen1,Ptprc,Ptprf,Ptprs,Rac2,Robo1,S100a8,Slit2,Stxbp3,Thbs1,Thbs4,Thy1,Tjp1,Tjp2,Tln1,Vcam1,Vcl,Nt5e,Slc7a11,Cadm1,Astn2,Plek,Igdcc4,Parva,Tnip1,Jam2,M…	104/-
GO:0043269	regulation of monoatomic ion transport	-11.5299	0	-14.5422	-14.8336	-12.0914	11418,11421,11517,11606,11652,11838,11840,11931,11932,11933,11941,12010,12018,12043,12288,12293,12295,12296,12297,12298,12322,12349,12512,13040,13167,13483,13830,13844,14061,14199,14226,14381,14609,14664,14811,15170,15444,15551,15894,16412,16498,16502,16513,16520,16573,16854,17096,17992,18439,18754,18854,19055,19056,19058,19092,19229,19326,20617,20720,20928,21838,22063,22068,22218,22629,26558,573…	Asic2,Ace,Adcyap1r1,Agt,Akt2,Arc,Arf1,Atp1b1,Atp1b2,Atp1b3,Atp2b2,B2m,Bak1,Bcl2,Cacna1c,Cacna2d1,Cacnb1,Cacnb2,Cacnb3,Cacnb4,Camk2a,Car2,Cd63,Ctss,Dbi,Dpp6,Stom,Ephb2,F2,Fhl1,Fkbp1b,G6pdx,Gja1,Slc6a9,Grin2a,Ptpn6,Hpca,Htr1b,Icam1,Itgb1,Kcnab2,Kcnc1,Kcnj10,Kcnj4,Kif5b,Lgals3,Lyn,Ndufa4,P2rx7,Prkce,Pml,Ppp3ca,Ppp3cb,Ppp3r1,Prkg2,Ptk2b,Rab11b,Snca,Serpine2,Abcc9,Thy1,Trpc1,Trpc6,Sumo1,Ywhah,Homer3,J…	132/-
GO:0016054	organic acid catabolic process	-16.2257	0	-7.23852	-16.2257	-13.5671	11363,11364,11370,11409,11430,11847,12411,12896,13171,14073,14085,15107,15211,15212,15488,16922,18242,19125,19703,20501,23986,30956,52430,52815,56794,58875,67460,67528,69219,69772,71985,74091,76187,80911,97212,104174,106861,107747,110959,216188,231086,245847,257635,434437,11668,11816,14635,18950,22271,57357,109801,109857,319625,12894,13167,13850,17850,19063,19224,23887,26897,56473,68041,68801,941…	Acadl,Acadm,Acadvl,Acads,Acox1,Arg2,Cbs,Cpt2,Dbt,Faah,Fah,Hadh,Hexa,Hexb,Hsd17b4,Phyh,Oat,Prodh,Renbp,Slc16a1,Eci2,Aass,Echdc2,Ldhd,Hacl1,Hibadh,Decr1,Nudt7,Ddah1,Bdh2,Acad10,Npl,Adhfe1,Acox3,Hadha,Gldc,Abhd3,Aldh1l1,Nudt19,Aldh1l2,Hadhb,Amdhd2,Sdsl,Amt,Aldh1a1,Apoe,Galk1,Pnp,Upp1,Srd5a3,Glo1,Cbr3,Galm,Cpt1a,Dbi,Ephx2,Mmut,Ppt1,Ptgs1,Ggt5,Acot1,Fads2,Mid1ip1,Elovl5,Acsbg1,Acsf2,Acot11,Pon2,Prdx6,…	107/-
R-MMU-6794362	Protein-protein interactions at synapses	-6.78578	0	-14.3739	#N/A	#N/A	#N/A	#N/A	#N/A
GO:0022604	regulation of cell morphogenesis	-7.86775	0	-16.6241	-17.157	-14.2387	11838,12323,12345,12505,12891,12978,13047,13144,13169,13822,13828,13838,13844,14061,14268,14674,14745,15212,15894,16019,16202,16404,16456,16952,17118,17698,17886,18223,18606,18844,19229,19268,19303,19684,20196,20203,20692,20739,20979,22350,23790,29806,50768,56212,56699,57342,57912,66713,69581,69710,71751,71960,72729,74053,75788,77767,104445,108100,116837,116838,140570,140571,170758,171171,217340,…	Arc,Camk2b,Capzb,Cd44,Cpne6,Csf1r,Cux1,Dapk3,Dbnl,Epb41l2,Epb42,Epha4,Ephb2,F2,Fn1,Gna13,Lpar1,Hexb,Icam1,Ighm,Ilk,Itga7,F11r,Anxa1,Marcks,Msn,Myh9,Numbl,Enpp2,Plxna1,Ptk2b,Ptprf,Pxn,Rdx,S100a13,S100b,Sparc,Spta1,Syt1,Ezr,Coro1c,Limd1,Dlc1,Rhog,Cdc42ep4,Parva,Cdc42se1,Actr2,Rhou,Arap1,Map3k13,Myh14,Cdc42se2,Grip1,Smurf1,Ermn,Cdc42ep1,Baiap2,Rims1,Rims2,Plxnb2,Plxnb3,Rac3,Ntng2,Rnf157,Itpka,Plxnb1…	72/-
GO:0051668	localization within membrane	-9.12977	0	-13.6997	-14.9154	-12.1599	11512,11652,11816,11931,11933,12122,12295,12296,12297,12300,12306,12322,12492,13430,13483,14127,14130,14806,14809,14811,16414,16456,16668,16859,16897,16905,17913,18145,18164,18191,19092,19264,19326,19339,19340,19684,20533,20619,20907,20909,21838,22318,22342,22350,23969,27008,30055,53421,54376,55978,56322,56428,57743,57816,58244,65106,66333,66384,66460,67067,67295,67384,67457,68115,69683,69908,704…	Adcy6,Akt2,Apoe,Atp1b1,Atp1b3,Bid,Cacnb1,Cacnb2,Cacnb3,Cacng2,Anxa2,Camk2a,Scarb2,Dnm2,Dpp6,Fcer1g,Fcgr2b,Grik2,Grik5,Grin2a,Itgb2,F11r,Krt18,Lgals9,Llgl1,Lmna,Myo1c,Npc1,Nptx1,Nrxn3,Prkg2,Ptprc,Rab11b,Rab3a,Rab3d,Rdx,Slc4a1,Snap23,Stx1a,Stx4a,Thy1,Vamp2,Lin7b,Ezr,Pacsin1,Micall1,Timm13,Sec61a1,Cacng3,Ift20,Timm22,Mtch2,Sec61a2,Tesc,Stx6,Arl6ip5,Aqp11,Srp19,Sys1,Romo1,Rab3c,Bag4,Frmd8,Maip1,Emc10…	112/-
GO:0050803	regulation of synapse structure or activity	-8.7614	0	-15.0853	-15.0853	-12.5058	11418,11487,11816,12386,12564,13138,13169,13643,13838,13841,13844,14130,14735,16180,16412,18213,18223,18530,19164,19229,19268,19280,19655,19876,20563,20616,20617,20692,24088,26364,26416,26570,56376,66713,70530,72961,73728,74342,74762,75409,76108,80749,83433,107831,108100,108155,171171,216028,217480,223254,225875,226359,227580,228550,229715,233067,234267,235604,241263,241770,242384,243499,245450,2…	Asic2,Adam10,Apoe,Ctnna2,Cdh8,Dag1,Dbnl,Efnb3,Epha4,Epha7,Ephb2,Fcgr2b,Gpc4,Il1rap,Itgb1,Ntrk3,Numbl,Pcdh8,Psen1,Ptk2b,Ptprf,Ptprs,Rbmx,Robo1,Slit2,Snap91,Snca,Sparc,Tlr2,Adgre5,Mapk14,Slc7a11,Pdlim5,Actr2,Lrfn2,Slc17a7,Psd,Lrrtm1,Mdga1,Slitrk5,Rap2a,Lrfn1,Trem2,Adgrb1,Baiap2,Ogt,Ntng2,Lrrtm3,Dgkb,Farp1,Lrfn4,C1ql2,C1ql3,Itpka,Amigo1,Lrfn3,Gpm6a,Camkv,Gpr158,Rims4,Lingo2,Lrrtm4,Slitrk2,Nlgn3,Ephb…	94/-
GO:0031175	neuron projection development	-21.3843	0	-22.7938	-25.1858	-21.7702	11352,11491,11816,11941,12043,12305,12322,12368,12386,12488,12505,12552,12647,12759,12803,12978,13043,13131,13138,13169,13176,13361,13430,13641,13642,13643,13649,13838,13839,13840,13841,13844,14130,14182,14432,14580,14609,14763,14790,15530,16202,16412,16467,16573,16765,16779,16897,17096,17756,17758,17762,17828,17920,17974,18000,18164,18186,18213,18223,18488,18605,18717,18806,18844,19055,19229,192…	Abl2,Adam17,Apoe,Atp2b2,Bcl2,Ddr1,Camk2a,Casp6,Ctnna2,Cd2ap,Cd44,Cdh11,Chat,Clu,Cntf,Csf1r,Cttn,Dab1,Dag1,Dbnl,Dcc,Dhfr,Dnm2,Efnb1,Efnb2,Efnb3,Egfr,Epha4,Epha5,Epha6,Epha7,Ephb2,Fcgr2b,Fgfr1,Gap43,Gfap,Gja1,Gpr37,Grcc10,Hspg2,Ilk,Itgb1,Atcay,Kif5b,Stmn1,Lamb2,Llgl1,Lyn,Map2,Map4,Mapt,Bloc1s5,Myo6,Nck2,Septin2,Nptx1,Nrp1,Ntrk3,Numbl,Cntn3,Enpp1,Pip5k1c,Pld2,Plxna1,Ppp3ca,Ptk2b,Ptprf,Rab3a,Robo1,S1…	215/-
GO:0098657	import into cell	-22.0469	0	-24.4765	-27.7142	-24.2317	11303,11352,11629,11745,11772,11777,11778,11816,11838,11931,11932,11933,11989,12288,12290,12300,12475,12492,12505,12527,13043,13132,13169,13429,13430,13854,14127,14129,14130,14580,14664,14799,14800,14816,14824,15530,15551,16016,16017,16332,16409,16412,16414,16513,16520,16835,16889,16952,17101,17533,17886,17913,17920,17957,18145,18439,18613,18717,18753,18806,19063,19164,19662,20404,20405,20496,205…	Abca1,Abl2,Aif1,Anxa3,Ap2a2,Ap3s1,Ap3s2,Apoe,Arc,Atp1b1,Atp1b2,Atp1b3,Slc7a3,Cacna1c,Cacna1e,Cacng2,Cd14,Scarb2,Cd44,Cd9,Cttn,Dab2,Dbnl,Dnm1,Dnm2,Epn1,Fcer1g,Fcgr1,Fcgr2b,Gfap,Slc6a9,Gria1,Gria2,Grm1,Grn,Hspg2,Htr1b,Ighg2b,Ighg1,Inppl1,Itgam,Itgb1,Itgb2,Kcnj10,Kcnj4,Ldlr,Lipa,Anxa1,Lyst,Mrc1,Myh9,Myo1c,Myo6,Napb,Npc1,P2rx7,Pecam1,Pip5k1c,Prkcd,Pld2,Ppt1,Psen1,Rbp4,Sh3gl2,Sh3gl1,Slc12a2,Slc1a3,Slc…	152/-
GO:0060627	regulation of vesicle-mediated transport	-24.2994	0	-23.3085	-24.2994	-20.8838	11806,11816,11838,12010,12217,12306,12475,12476,12488,12512,12759,12889,12890,13429,14127,14129,14130,14809,15444,16017,16409,16412,16414,16423,16510,16854,16859,17096,17698,17957,18000,18439,18717,18805,18806,18952,19055,19056,19058,19063,19128,19264,19339,19340,19354,19684,19894,20404,20405,20616,20617,20619,20907,20909,20911,20912,20964,20971,20979,21817,22317,22318,22350,22370,23969,24088,263…	Apoa1,Apoe,Arc,B2m,Bsn,Anxa2,Cd14,Cd151,Cd2ap,Cd63,Clu,Cplx1,Cplx2,Dnm1,Fcer1g,Fcgr1,Fcgr2b,Grik5,Hpca,Ighg1,Itgam,Itgb1,Itgb2,Cd47,Kcnh1,Lgals3,Lgals9,Lyn,Msn,Napb,Septin2,P2rx7,Pip5k1c,Pld1,Pld2,Septin4,Ppp3ca,Ppp3cb,Ppp3r1,Ppt1,Pros1,Ptprc,Rab3a,Rab3d,Rac2,Rdx,Rph3a,Sh3gl2,Sh3gl1,Snap91,Snca,Snap23,Stx1a,Stx4a,Stxbp2,Stxbp3,Syn1,Sdc4,Syt1,Tgm2,Vamp1,Vamp2,Ezr,Vtn,Pacsin1,Tlr2,Axl,Pclo,Scamp5,P…	98/-
GO:0050804	modulation of chemical synaptic transmission	-17.4112	0	-21.471	-23.7216	-20.461	11421,11606,11784,11816,11838,11840,11941,12290,12297,12298,12300,12307,12322,12323,12349,12488,12494,12552,12647,12889,12890,13051,13138,13167,13176,13429,13643,13649,13838,13841,13844,14130,14299,14580,14664,14799,14800,14802,14806,14809,14811,14816,14823,15551,16412,16504,16510,16513,16573,16653,17762,17920,18168,18191,18439,18530,18585,18605,18754,18815,19055,19058,19141,19164,19229,19280,193…	Ace,Agt,Apba2,Apoe,Arc,Arf1,Atp2b2,Cacna1e,Cacnb3,Cacnb4,Cacng2,Calb1,Camk2a,Camk2b,Car2,Cd2ap,Cd38,Cdh11,Chat,Cplx1,Cplx2,Cx3cr1,Dag1,Dbi,Dcc,Dnm1,Efnb3,Egfr,Epha4,Epha7,Ephb2,Fcgr2b,Ncs1,Gfap,Slc6a9,Gria1,Gria2,Gria4,Grik2,Grik5,Grin2a,Grm1,Grm8,Htr1b,Itgb1,Kcnc3,Kcnh1,Kcnj10,Kif5b,Kras,Mapt,Myo6,Npy5r,Nrxn3,P2rx7,Pcdh8,Pde9a,Enpp1,Prkce,Plg,Ppp3ca,Ppp3r1,Lgmn,Psen1,Ptk2b,Ptprs,Rab3a,S100b,Sh3g…	152/-
R-MMU-112316	Neuronal System	-10.826	0	-20.7945	-22.6431	-19.5865	11669,11772,12294,12295,12296,12297,12298,12300,12322,12323,12889,13821,13822,14394,14395,14401,14402,14700,14701,14702,14799,14802,14809,14811,14816,16180,16485,16498,16502,16504,16510,16513,16531,17920,18191,18213,18797,19024,19268,19280,19339,20111,20168,20512,20907,20928,20964,20965,20979,22318,22342,26558,27204,52589,53623,54376,54393,55984,55991,65106,67760,70530,71770,72961,74053,74342,754…	Aldh2,Ap2a2,Cacna2d3,Cacnb1,Cacnb2,Cacnb3,Cacnb4,Cacng2,Camk2a,Camk2b,Cplx1,Epb41l1,Epb41l2,Gabra1,Gabra2,Gabrb2,Gabrb3,Gng10,Gng12,Gng2,Gria1,Gria4,Grik5,Grin2a,Grm1,Il1rap,Kcna1,Kcnab2,Kcnc1,Kcnc3,Kcnh1,Kcnj10,Kcnma1,Myo6,Nrxn3,Ntrk3,Plcb3,Ppfibp2,Ptprf,Ptprs,Rab3a,Rps6ka1,Rtn3,Slc1a3,Stx1a,Abcc9,Syn1,Syn2,Syt1,Vamp2,Lin7b,Homer3,Syn3,Ncald,Gria3,Cacng3,Gabbr1,Camkk1,Panx1,Arl6ip5,Slc38a2,Lrfn2…	99/-
GO:0099536	synaptic signaling	-13.4427	0	-28.931	-28.931	-25.1475	11784,12288,12290,12295,12296,12297,12298,12564,12647,12671,12890,13138,13527,13643,13844,14394,14395,14401,14402,14403,14799,14800,14802,14806,14809,14823,15551,16180,16531,17920,17957,18191,18439,18530,18754,18815,19055,19063,19164,19280,19339,19697,19894,20238,20616,20617,20619,20848,20907,20909,20911,20912,20964,20965,20977,20979,21823,22063,22318,22342,23936,26875,27062,27204,30794,50932,509…	Apba2,Cacna1c,Cacna1e,Cacnb1,Cacnb2,Cacnb3,Cacnb4,Cdh8,Chat,Chrm3,Cplx2,Dag1,Dtna,Efnb3,Ephb2,Gabra1,Gabra2,Gabrb2,Gabrb3,Gabrd,Gria1,Gria2,Gria4,Grik2,Grik5,Grm8,Htr1b,Il1rap,Kcnma1,Myo6,Napb,Nrxn3,P2rx7,Pcdh8,Prkce,Plg,Ppp3ca,Ppt1,Psen1,Ptprs,Rab3a,Rela,Rph3a,Atxn1,Snap91,Snca,Snap23,Stat3,Stx1a,Stx4a,Stxbp2,Stxbp3,Syn1,Syn2,Syp,Syt1,Th,Trpc1,Vamp2,Lin7b,Lynx1,Pclo,Cadps,Syn3,Pdlim4,Mink1,Mpp2,…	209/-
