# Supplementary material for: PKD1-tau disulfide linkage promotes tau phosphorylation and tau accumulation in a tauopathy mouse model
Source: Research Square preprint supplement (doi:10.21203/rs.3.rs-7655539/v1), 2025-10-13
Supplement: Supplementary file 8 [file f511b30a711363d3f61523b5.xlsx]

## Sheet: Table S1
Case number	Gender	Age	Primary Neuropathological Diagnosis	Postmortem Interval (h)
1	Female	86	AD	6.33
2	Female	80	AD	18
3	Female	100	AD	3
4	Female	80	AD	13
5	Male	83	AD	4.5
6	Male	82	AD	38
7	Male	97	AD	26.5
8	Male	40	FTDP-17 (G389R)	18.5
9	Male	63	FTDP-17 (P301L)	5
10	Female	55	FTDP-17 (P301L)	5
11	Female	65	FTDP-17 (presumed)	12
12	Female	65	FTDP-17 (R406W)	15
13	Female	82	PSP	11.5
14	Male	73	PSP	4
15	Male	60	PSP	63
16	Female	70	PSP	15
17	Male	83	PSP	10
18	Male	80	Control	7.5
19	Female	84	Control	20
20	Male	79	Control	29
21	Male	83	Control	38
22	Female	96	Control	32
23	Male	86	Control	5
24	Female	87	Control	12.5
25	Female	81	Control	7
