# Supplementary material for: PKD1-tau disulfide linkage promotes tau phosphorylation and tau accumulation in a tauopathy mouse model
Source: Research Square preprint supplement (doi:10.21203/rs.3.rs-7655539/v1), 2025-10-13
Supplement: Supplementary file 9 [file f6d6f24e5e71fd450d191c6d.xlsx]

## Sheet: Table S4
Gene name	Protein ID	PKD1-/-_centered	PKD1+/+_centered	PS19.PKD1-/-_centered	PS19.PKD1+/+_centered	PS19.PKD1+/+_vs_PKD1+/+T_p.val	PS19.PKD1+/+_vs_PKD1+/+_p.adj	PS19.PKD1+/+_vs_PKD1+/+_significant	PS19.PKD1-/-_vs_PS19.PKD1+/+_p.val	PS19.PKD1-/-_vs_PS19.PKD1+/+_p.adj	PS19.PKD1-/-_vs_PS19.PKD1+/+_significant	PS19.PKD1-/-_vs_PKD1+/+_p.val	PS19.PKD1-/-_vs_PKD1+/+_p.adj	PS19.PKD1-/-_vs_PKD1+/+_significant
Aass	Q99K67	-0.186	-0.166	-0.0558	0.408	5.50964e-09	3.89e-07	TRUE	8.43358e-08	5.52e-06	TRUE	0.0315386	0.154	FALSE
Abca1	P41233	-0.32	-0.217	-0.236	0.773	1.36006e-11	6.59e-09	TRUE	1.05876e-11	1.1e-08	TRUE	0.724501	0.868	FALSE
Abcc9	P70170	0.121	0.0621	0.044	-0.227	0.000326217	0.00186	TRUE	0.0005746	0.00443	TRUE	0.772086	0.894	FALSE
Abhd14b	Q8VCR7	-0.108	-0.197	-0.0459	0.351	1.10995e-05	0.000127	TRUE	0.000282317	0.00257	TRUE	0.0888571	0.279	FALSE
Abhd3	Q91ZH7	0.00476	-0.215	-0.0738	0.284	0.000532581	0.00272	TRUE	0.00644295	0.029	TRUE	0.22749	0.476	FALSE
Abhd4	Q8VD66	-0.189	-0.0366	-0.107	0.333	1.23914e-05	0.000139	TRUE	1.76394e-06	5.27e-05	TRUE	0.235227	0.483	FALSE
Abi3	Q8BYZ1	-0.141	-0.179	-0.0164	0.336	1.49822e-05	0.000162	TRUE	0.000591156	0.00453	TRUE	0.0613366	0.23	FALSE
Acad10	Q8K370	-0.0775	-0.16	-0.0465	0.284	4.90756e-05	0.000413	TRUE	0.000752504	0.00548	TRUE	0.164431	0.395	FALSE
Acadl	P51174	-0.0993	-0.124	-0.0551	0.279	3.20943e-08	1.37e-06	TRUE	3.34907e-07	1.54e-05	TRUE	0.0839762	0.271	FALSE
Acadm	P45952	0.0804	-0.142	-0.116	0.178	0.00406835	0.0138	TRUE	0.00705092	0.031	TRUE	0.787041	0.904	FALSE
Acads	Q07417	-0.191	-0.159	-0.0356	0.385	3.44546e-06	5.18e-05	TRUE	5.4516e-05	0.000727	TRUE	0.118248	0.328	FALSE
Acot1	O55137	-0.0657	-0.0806	-0.0782	0.225	8.63497e-06	0.000106	TRUE	9.42172e-06	0.000193	TRUE	0.958052	0.986	FALSE
Acox3	Q9EPL9	-0.0202	-0.0372	-0.18	0.237	0.00954298	0.0273	TRUE	0.000440269	0.00361	TRUE	0.141415	0.362	FALSE
Acsbg1	Q99PU5	-0.0865	-0.0581	-0.108	0.252	2.21527e-07	6.34e-06	TRUE	3.49475e-08	2.85e-06	TRUE	0.161341	0.392	FALSE
Acsf2	Q8VCW8	-0.202	-0.128	-0.132	0.461	1.2549e-10	2.53e-08	TRUE	1.13902e-10	4.6e-08	TRUE	0.906949	0.965	FALSE
Acss1	Q99NB1	-0.0627	-0.0707	-0.112	0.245	4.06563e-06	5.99e-05	TRUE	9.96701e-07	3.43e-05	TRUE	0.365165	0.611	FALSE
Adam10	O35598	-0.178	-0.107	-0.0503	0.336	2.05905e-06	3.48e-05	TRUE	9.70946e-06	0.000197	TRUE	0.339601	0.589	FALSE
Adam17	Q9Z0F8	-0.0403	-0.306	-0.222	0.568	4.94242e-06	6.86e-05	TRUE	1.5093e-05	0.000275	TRUE	0.503094	0.726	FALSE
Adcy1	O88444	0.0996	0.231	-0.0245	-0.306	4.77207e-07	1.15e-05	TRUE	0.000436226	0.00358	TRUE	0.000985916	0.0281	FALSE
Adgre5	Q9Z0M6	-0.0395	-0.0805	-0.349	0.469	0.0146667	0.0386	TRUE	0.000985931	0.00674	TRUE	0.195452	0.436	FALSE
Adipor1	Q91VH1	-0.16	-0.0835	-0.227	0.471	4.67798e-06	6.65e-05	TRUE	3.16536e-07	1.49e-05	TRUE	0.0859407	0.275	FALSE
Adk	P55264	-0.109	-0.0333	-0.174	0.317	2.23435e-06	3.71e-05	TRUE	3.66714e-08	2.91e-06	TRUE	0.0082174	0.0759	FALSE
Adss1	P28650	-0.192	-0.124	-0.121	0.437	5.94044e-09	4.15e-07	TRUE	6.3975e-09	7.88e-07	TRUE	0.945069	0.981	FALSE
Agt	P11859	0.146	-0.308	-0.0687	0.231	2.76714e-06	4.38e-05	TRUE	0.000939648	0.00651	TRUE	0.00493609	0.057	FALSE
Aif1	O70200	-0.2	-0.189	-0.186	0.575	1.85153e-06	3.23e-05	TRUE	1.91245e-06	5.63e-05	TRUE	0.983057	0.993	FALSE
Ak2	Q9WTP6	0.0431	-0.125	-0.161	0.242	1.29955e-05	0.000144	TRUE	4.62178e-06	0.000114	TRUE	0.53248	0.747	FALSE
Ak5	Q920P5	0.141	0.165	0.0222	-0.328	2.94392e-07	7.95e-06	TRUE	1.50319e-05	0.000274	TRUE	0.020078	0.121	FALSE
Akt2	Q60823	0.0239	-0.128	-0.217	0.321	0.00879911	0.0257	TRUE	0.00264403	0.0147	TRUE	0.556408	0.764	FALSE
Aldh16a1	Q571I9	0.154	-0.304	-0.181	0.331	0.00213142	0.0082	TRUE	0.00911645	0.038	TRUE	0.478143	0.707	FALSE
Aldh1a1	P24549	-0.0972	-0.202	-0.0956	0.395	3.4335e-07	8.95e-06	TRUE	3.47675e-06	9.15e-05	TRUE	0.132621	0.35	FALSE
Aldh1l1	Q8R0Y6	-0.191	-0.115	-0.102	0.408	6.59016e-11	1.5e-08	TRUE	9.19079e-11	3.93e-08	TRUE	0.680408	0.846	FALSE
Aldh1l2	Q8K009	-0.0354	-0.0893	-0.195	0.32	7.4162e-06	9.31e-05	TRUE	5.16229e-07	2.12e-05	TRUE	0.0968381	0.293	FALSE
Aldh3b1	Q80VQ0	-0.245	-0.128	0.0114	0.361	1.27594e-06	2.39e-05	TRUE	5.0588e-05	0.00069	TRUE	0.038587	0.173	FALSE
Aldh7a1	Q9DBF1	-0.151	-0.0479	-0.0597	0.259	1.63165e-06	2.89e-05	TRUE	1.04609e-06	3.51e-05	TRUE	0.766317	0.892	FALSE
Alg5	Q9DB25	0.274	0.185	0.0955	-0.555	0.00385805	0.0132	TRUE	0.0089127	0.0373	TRUE	0.68118	0.847	FALSE
Amigo1	Q80ZD8	0.0592	0.236	0.0317	-0.327	0.000312808	0.0018	TRUE	0.00918897	0.0381	TRUE	0.107659	0.31	FALSE
Ampd3	O08739	-0.125	-0.157	-0.108	0.39	1.093e-08	6.13e-07	TRUE	3.63523e-08	2.91e-06	TRUE	0.309125	0.557	FALSE
Amph	Q7TQF7	0.104	0.0512	0.0919	-0.247	1.9448e-05	0.000198	TRUE	4.79083e-06	0.000116	TRUE	0.405384	0.646	FALSE
Ankrd13a	Q80UP5	-0.14	-0.0884	-0.0553	0.284	3.81082e-05	0.000336	TRUE	9.68208e-05	0.00112	TRUE	0.608965	0.8	FALSE
Ankrd44	B2RXR6	-0.172	-0.0339	-0.225	0.431	0.00060022	0.00298	TRUE	2.21899e-05	0.000371	TRUE	0.0920082	0.285	FALSE
Ano6	Q6P9J9	0.0733	-0.191	-0.225	0.343	4.35024e-06	6.3e-05	TRUE	2.1587e-06	6.3e-05	TRUE	0.655638	0.832	FALSE
Ano8	Q6PB70	-0.0385	0.121	0.0971	-0.18	0.00229461	0.00867	TRUE	0.00414976	0.0208	TRUE	0.770665	0.894	FALSE
Anxa3	O35639	-0.148	-0.233	-0.0994	0.48	7.75352e-10	8.8e-08	TRUE	1.16642e-08	1.23e-06	TRUE	0.017427	0.113	FALSE
Anxa5	P48036	-0.222	-0.297	-0.0533	0.572	1.74835e-10	2.95e-08	TRUE	1.33088e-08	1.36e-06	TRUE	0.000480658	0.0188	FALSE
Aox1	O54754	-0.147	-0.19	-0.0472	0.384	7.93655e-05	0.000608	TRUE	0.00103494	0.00697	TRUE	0.19509	0.436	FALSE
Ap3m2	Q8R2R9	0.0563	0.0877	0.0645	-0.209	2.09545e-06	3.52e-05	TRUE	5.29826e-06	0.000125	TRUE	0.557771	0.766	FALSE
Apba2	P98084	0.0142	0.114	0.0888	-0.217	8.45383e-08	3.12e-06	TRUE	2.21627e-07	1.16e-05	TRUE	0.465338	0.697	FALSE
Apeh	Q8R146	-0.0517	-0.0543	-0.12	0.226	4.71904e-06	6.68e-05	TRUE	4.05778e-07	1.81e-05	TRUE	0.117091	0.326	FALSE
Apoa1	Q00623	-0.0508	-0.203	-0.118	0.372	0.00215405	0.00826	TRUE	0.00646291	0.029	TRUE	0.590403	0.788	FALSE
Apoa4	P06728	-0.122	-0.267	-0.0442	0.434	6.9259e-05	0.000546	TRUE	0.00198515	0.0116	TRUE	0.0990063	0.296	FALSE
Apoe	P08226	-0.277	-0.201	-0.142	0.619	6.2289e-12	3.77e-09	TRUE	1.72954e-11	1.57e-08	TRUE	0.160528	0.391	FALSE
Aqp4	P55088	-0.0529	-0.208	-0.0983	0.359	0.000119589	0.000846	TRUE	0.000816658	0.00584	TRUE	0.327829	0.576	FALSE
Arap1	Q4LDD4	-0.139	-0.0462	-0.0399	0.225	0.00169956	0.00684	TRUE	0.00203367	0.0119	TRUE	0.929148	0.975	FALSE
Arg2	O08691	-0.253	-0.279	-0.00321	0.536	0.000569256	0.00285	TRUE	0.0110399	0.0439	TRUE	0.156239	0.385	FALSE
Arhgap25	Q8BYW1	-0.398	0.00839	-0.0615	0.451	0.000118922	0.000844	TRUE	2.72394e-05	0.000426	TRUE	0.420582	0.658	FALSE
Arhgap45	Q3TBD2	0.0997	-0.166	-0.211	0.277	0.000200449	0.00129	TRUE	7.90131e-05	0.000962	TRUE	0.620017	0.809	FALSE
Arhgdib	Q61599	-0.295	-0.171	0.00989	0.457	3.15734e-05	0.00029	TRUE	0.000769145	0.00558	TRUE	0.105428	0.306	FALSE
Arhgef10	Q8C033	-0.213	-0.129	-0.0797	0.423	3.04165e-08	1.34e-06	TRUE	9.98489e-08	6.31e-06	TRUE	0.344091	0.592	FALSE
Armc10	Q9D0L7	-0.00734	0.204	0.0338	-0.23	3.40367e-05	0.000308	TRUE	0.00273573	0.015	TRUE	0.0351565	0.164	FALSE
Arpc1b	Q9WV32	-0.305	-0.286	-0.0637	0.654	6.01471e-11	1.46e-08	TRUE	2.21491e-09	3.74e-07	TRUE	0.00102028	0.0284	FALSE
Arpc4	P59999	0.0784	0.0934	0.0987	-0.27	0.00144563	0.00604	TRUE	0.00128963	0.00826	TRUE	0.954647	0.985	FALSE
As3mt	Q91WU5	-0.111	-0.0714	-0.092	0.274	1.25651e-06	2.36e-05	TRUE	6.32469e-07	2.43e-05	TRUE	0.639805	0.821	FALSE
Aspa	Q8R3P0	-0.28	-0.163	-0.11	0.553	7.09532e-09	4.69e-07	TRUE	1.9228e-08	1.84e-06	TRUE	0.380404	0.627	FALSE
Aspg	A0JNU3	-0.346	-0.331	-0.39	1.07	4.38566e-05	0.000376	TRUE	2.85351e-05	0.000442	TRUE	0.808493	0.916	FALSE
Asph	Q8BSY0	-0.145	-0.302	-0.05	0.497	6.70505e-07	1.48e-05	TRUE	4.55037e-05	0.000628	TRUE	0.0182615	0.116	FALSE
Asphd1	Q2TA57	0.124	0.19	0.0707	-0.385	4.38475e-07	1.09e-05	TRUE	6.54803e-06	0.000148	TRUE	0.0901685	0.282	FALSE
Ass1	P16460	-0.23	-0.134	-0.0228	0.386	5.42246e-09	3.86e-07	TRUE	1.15517e-07	6.93e-06	TRUE	0.01886	0.118	FALSE
Astn1	Q61137	0.0923	0.0623	0.0733	-0.228	1.55068e-06	2.79e-05	TRUE	1.00091e-06	3.43e-05	TRUE	0.769152	0.893	FALSE
Atcay	Q8BHE3	0.0942	0.0519	0.0691	-0.215	0.000796486	0.00375	TRUE	0.000469304	0.00379	TRUE	0.788668	0.905	FALSE
Atp1a2	Q6PIE5	-0.0626	-0.0804	-0.0634	0.206	1.18709e-07	3.99e-06	TRUE	2.51933e-07	1.27e-05	TRUE	0.572649	0.777	FALSE
Atp2b1	G5E829	0.0953	0.0556	0.0573	-0.208	1.72867e-05	0.00018	TRUE	1.61754e-05	0.000289	TRUE	0.969001	0.99	FALSE
Atp6v0a1	Q9Z1G4	0.0739	0.0738	0.0616	-0.209	8.13789e-07	1.7e-05	TRUE	1.36867e-06	4.36e-05	TRUE	0.725137	0.868	FALSE
Atp6v0c	P63082	0.512	-0.1	-0.00114	-0.411	0.00480619	0.0157	TRUE	0.000587468	0.00451	TRUE	0.305091	0.553	FALSE
Atp6v1g2	Q9WTT4	0.0562	0.0889	0.0721	-0.217	0.000177889	0.00117	TRUE	0.000298344	0.00268	TRUE	0.787077	0.904	FALSE
Atp8a1	P70704	0.0661	0.134	0.0467	-0.247	1.4003e-07	4.52e-06	TRUE	3.12681e-06	8.41e-05	TRUE	0.0444401	0.19	FALSE
Axl	Q00993	-0.126	-0.116	-0.134	0.375	0.00696632	0.0212	TRUE	0.00550146	0.026	TRUE	0.90755	0.965	FALSE
B2m	P01887	-0.353	-0.32	-0.126	0.8	4.93484e-07	1.17e-05	TRUE	4.53131e-06	0.000113	TRUE	0.15526	0.384	FALSE
Bag3	Q9JLV1	-0.168	-0.173	-0.104	0.445	9.36673e-09	5.67e-07	TRUE	4.29154e-08	3.25e-06	TRUE	0.202676	0.446	FALSE
Baiap2	Q8BKX1	0.163	0.0663	0.0629	-0.292	8.02763e-08	3.02e-06	TRUE	9.04145e-08	5.76e-06	TRUE	0.925409	0.973	FALSE
Bak1	O08734	-0.0163	-0.138	-0.112	0.267	0.00168098	0.00679	TRUE	0.00277579	0.0152	TRUE	0.804319	0.914	FALSE
Basp1	Q91XV3	-0.0044	0.0663	0.213	-0.275	0.00537738	0.0172	TRUE	0.00033651	0.00295	TRUE	0.179946	0.415	FALSE
Bdh2	Q8JZV9	-0.0156	-0.0644	-0.146	0.226	0.00692582	0.0211	TRUE	0.00118208	0.00772	TRUE	0.388974	0.634	FALSE
Bid	P70444	0.164	0.238	-0.0299	-0.373	1.66916e-05	0.000175	TRUE	0.0030226	0.0162	TRUE	0.0141728	0.101	FALSE
Bin2	D3Z6Q9	-0.0284	-0.251	-0.0672	0.347	0.000122724	0.000865	TRUE	0.00273166	0.015	TRUE	0.129279	0.344	FALSE
Bloc1s5	Q8R015	-0.0269	-0.441	-0.182	0.649	3.38231e-06	5.1e-05	TRUE	6.20001e-05	0.000792	TRUE	0.102213	0.301	FALSE
Blvrb	Q923D2	-0.112	-0.177	-0.0192	0.308	5.48656e-05	0.000455	TRUE	0.00180483	0.0108	TRUE	0.0855708	0.274	FALSE
Bmerb1	Q8R1Y2	-0.026	0.16	0.0811	-0.215	0.000203479	0.0013	TRUE	0.00152365	0.00949	TRUE	0.313998	0.561	FALSE
Bmp2k	Q91Z96	-0.224	-0.149	-0.0951	0.467	0.000604839	0.003	TRUE	0.00127264	0.00819	TRUE	0.709062	0.86	FALSE
Bnip2	O54940	0.0388	0.513	0.296	-0.848	0.000257629	0.00156	TRUE	0.00114062	0.00751	TRUE	0.453105	0.687	FALSE
Brinp1	Q920P3	0.196	0.117	0.0213	-0.334	9.69391e-09	5.77e-07	TRUE	1.96242e-07	1.06e-05	TRUE	0.0244844	0.134	FALSE
Bsn	O88737	0.113	0.101	0.0602	-0.275	2.01115e-08	9.61e-07	TRUE	8.60885e-08	5.58e-06	TRUE	0.242861	0.49	FALSE
C1ql3	Q9ESN4	0.0427	0.128	0.125	-0.296	0.00142315	0.00597	TRUE	0.00149207	0.00934	TRUE	0.981232	0.993	FALSE
Ca2	P00920	-0.21	-0.259	-0.039	0.508	5.88244e-07	1.34e-05	TRUE	2.64326e-05	0.000417	TRUE	0.0279851	0.144	FALSE
Ca4	Q64444	0.0635	0.199	0.262	-0.524	6.30682e-06	8.23e-05	TRUE	2.42176e-06	6.95e-05	TRUE	0.548863	0.759	FALSE
Ca5b	Q9QZA0	-0.0995	-0.149	-0.0749	0.323	0.00320283	0.0113	TRUE	0.00968492	0.0396	TRUE	0.587918	0.787	FALSE
Cacna1c	Q01815	0.142	0.0728	0.0273	-0.242	7.74461e-07	1.64e-05	TRUE	4.72306e-06	0.000115	TRUE	0.247208	0.495	FALSE
Cacna2d1	O08532	0.101	0.13	0.0894	-0.321	2.64918e-07	7.29e-06	TRUE	8.30785e-07	2.97e-05	TRUE	0.422169	0.658	FALSE
Cacna2d3	Q9Z1L5	0.099	0.0751	0.0905	-0.265	6.08581e-06	8.01e-05	TRUE	3.68783e-06	9.57e-05	TRUE	0.75507	0.886	FALSE
Cacnb3	P54285	0.111	0.0637	0.0456	-0.22	2.47776e-05	0.00024	TRUE	4.87942e-05	0.00067	TRUE	0.702549	0.857	FALSE
Cacng3	Q9JJV5	0.0955	0.1	0.0608	-0.256	0.000621945	0.00307	TRUE	0.00159967	0.00981	TRUE	0.637059	0.819	FALSE
Cadm2	Q8BLQ9	0.0237	0.127	0.0801	-0.231	1.55484e-06	2.79e-05	TRUE	7.69832e-06	0.000166	TRUE	0.318684	0.565	FALSE
Cadm4	Q8R464	-0.119	-0.14	-0.0767	0.336	1.44349e-06	2.65e-05	TRUE	7.36607e-06	0.000161	TRUE	0.308455	0.556	FALSE
Camk1d	Q8BW96	0.0799	0.169	0.0567	-0.306	4.66835e-05	0.000394	TRUE	0.000585876	0.0045	TRUE	0.193353	0.435	FALSE
Camk1g	Q91VB2	0.197	0.103	0.0134	-0.314	7.3484e-06	9.25e-05	TRUE	9.23109e-05	0.00109	TRUE	0.161504	0.392	FALSE
Capg	P24452	-0.631	-0.429	-0.118	1.18	4.79028e-10	6.11e-08	TRUE	8.06693e-09	9.61e-07	TRUE	0.0119425	0.0918	FALSE
Capn10	Q9ESK3	0.131	0.145	-0.00206	-0.275	2.69407e-05	0.000257	TRUE	0.00142548	0.00901	TRUE	0.0506184	0.205	FALSE
Capn2	O08529	-0.164	-0.111	-0.0524	0.328	2.78313e-08	1.25e-06	TRUE	1.69877e-07	9.42e-06	TRUE	0.163488	0.395	FALSE
Carhsp1	Q9CR86	0.052	-0.128	-0.336	0.412	0.000369236	0.00205	TRUE	1.47479e-05	0.00027	TRUE	0.0937254	0.287	FALSE
Cbr3	Q8K354	-0.094	-0.104	-0.0326	0.23	1.49874e-07	4.69e-06	TRUE	2.60854e-06	7.23e-05	TRUE	0.0610682	0.23	FALSE
Ccdc85c	E9Q6B2	0.171	0.164	0.0898	-0.424	0.00204381	0.00791	TRUE	0.0052768	0.0251	TRUE	0.641568	0.822	FALSE
Ccdc90b	Q8C3X2	-0.183	-0.161	-0.0332	0.377	9.32529e-08	3.3e-06	TRUE	2.43413e-06	6.95e-05	TRUE	0.033038	0.159	FALSE
Ccn3	Q64299	-0.017	0.132	0.126	-0.241	5.15461e-05	0.000429	TRUE	6.12559e-05	0.000783	TRUE	0.923983	0.973	FALSE
Cd109	Q8R422	-0.0486	-0.138	-0.0709	0.258	5.74751e-05	0.000471	TRUE	0.000338819	0.00297	TRUE	0.351768	0.598	FALSE
Cd14	P10810	-0.667	-0.558	0.113	1.11	6.21302e-06	8.12e-05	TRUE	0.000923048	0.00643	TRUE	0.0140746	0.1	FALSE
Cd151	O35566	-0.117	-0.0771	-0.177	0.371	0.00499712	0.0162	TRUE	0.00114997	0.00754	TRUE	0.471768	0.703	FALSE
Cd180	Q62192	-0.383	-0.377	-0.279	1.04	1.67302e-11	7.15e-09	TRUE	4.44869e-11	2.49e-08	TRUE	0.20528	0.45	FALSE
Cd2ap	Q9JLQ0	-0.158	-0.129	-0.0536	0.34	1.92909e-06	3.34e-05	TRUE	1.37392e-05	0.000257	TRUE	0.234369	0.482	FALSE
Cd44	P15379	-0.794	-0.613	-0.249	1.66	1.21694e-08	6.65e-07	TRUE	1.11528e-07	6.86e-06	TRUE	0.0820075	0.268	FALSE
Cd47	Q61735	0.0115	0.194	0.0637	-0.27	0.000364488	0.00202	TRUE	0.0047929	0.0232	TRUE	0.210679	0.456	FALSE
Cd55	Q61475	-0.0695	0.26	0.093	-0.283	4.50519e-05	0.000383	TRUE	0.00125863	0.00813	TRUE	0.0969969	0.293	FALSE
Cd63	P41731	-0.161	-0.154	-0.184	0.499	0.000234415	0.00145	TRUE	0.000153287	0.00162	TRUE	0.823128	0.923	FALSE
Cd74	P04441	0.2	0.249	0.0642	-0.514	2.87865e-06	4.52e-05	TRUE	5.74993e-05	0.000749	TRUE	0.0916042	0.284	FALSE
Cd9	P40240	-0.366	-0.174	0.0104	0.53	4.22683e-08	1.72e-06	TRUE	1.7127e-06	5.14e-05	TRUE	0.0148002	0.103	FALSE
Cdc42ep1	Q91W92	-0.222	-0.199	0.00877	0.412	1.46272e-06	2.68e-05	TRUE	0.000125249	0.00139	TRUE	0.0174644	0.113	FALSE
Cdh10	P70408	0.15	0.171	0.0191	-0.34	0.000189057	0.00124	TRUE	0.00339084	0.0177	TRUE	0.159272	0.389	FALSE
Cdh9	P70407	0.283	0.111	0.0694	-0.464	1.14039e-07	3.91e-06	TRUE	2.9008e-07	1.41e-05	TRUE	0.486589	0.714	FALSE
Cdkn2c	Q60772	-0.191	-0.116	-0.127	0.434	2.87235e-05	0.00027	TRUE	2.31616e-05	0.000381	TRUE	0.901904	0.962	FALSE
Celf4	Q7TSY6	0.117	0.195	0.00566	-0.318	0.000244501	0.00149	TRUE	0.00830626	0.0353	TRUE	0.0936679	0.287	FALSE
Cerk	Q8K4Q7	0.0435	-0.221	-0.255	0.433	0.0041427	0.0139	TRUE	0.00287873	0.0156	TRUE	0.857859	0.943	FALSE
Cers2	Q924Z4	-0.124	-0.163	-0.0551	0.342	0.000159077	0.00108	TRUE	0.00128644	0.00826	TRUE	0.293734	0.542	FALSE
Cggbp1	Q8BHG9	0.309	-0.238	-0.173	0.102	0.000677578	0.00329	TRUE	0.00348477	0.0181	TRUE	0.420569	0.658	FALSE
Chat	Q03059	-0.0237	-0.172	-0.0438	0.239	4.41062e-07	1.09e-05	TRUE	2.97799e-05	0.000455	TRUE	0.0163245	0.11	FALSE
Chchd5	Q9CQP3	-0.105	-0.0417	-0.076	0.223	0.00961324	0.0275	TRUE	0.00443197	0.0219	TRUE	0.703754	0.857	FALSE
Chgb	P16014	0.0944	0.103	0.179	-0.377	2.17269e-07	6.26e-06	TRUE	3.45486e-08	2.85e-06	TRUE	0.162655	0.394	FALSE
Chrm3	Q9ERZ3	0.157	0.0478	0.0459	-0.25	0.00822303	0.0243	TRUE	0.00853322	0.036	TRUE	0.985432	0.994	FALSE
Clcn2	Q9R0A1	-0.116	-0.099	-0.109	0.325	6.34513e-06	8.26e-05	TRUE	4.84712e-06	0.000117	TRUE	0.867743	0.949	FALSE
Cldn12	Q9ET43	-0.0218	0.0838	0.126	-0.188	0.00153996	0.00634	TRUE	0.000467193	0.00378	TRUE	0.55077	0.76	FALSE
Clic1	Q9Z1Q5	-0.234	-0.0948	-0.0568	0.385	1.22693e-06	2.32e-05	TRUE	3.18739e-06	8.54e-05	TRUE	0.535039	0.75	FALSE
Cltb	Q6IRU5	-0.213	0.232	0.229	-0.248	0.000346504	0.00195	TRUE	0.000362079	0.0031	TRUE	0.981916	0.993	FALSE
Clu	Q06890	-0.298	-0.28	-0.119	0.697	1.0064e-10	2.12e-08	TRUE	1.11232e-09	2.53e-07	TRUE	0.0153163	0.105	FALSE
Cmc1	Q9CPZ8	-0.132	-0.074	-0.065	0.271	2.83327e-06	4.47e-05	TRUE	3.8332e-06	9.88e-05	TRUE	0.847621	0.938	FALSE
Cmpk2	Q3U5Q7	-0.137	-0.0862	-0.139	0.363	1.83541e-08	8.89e-07	TRUE	4.35015e-09	5.97e-07	TRUE	0.20442	0.449	FALSE
Cnksr2	Q80YA9	0.162	0.055	0.0843	-0.301	4.65739e-07	1.14e-05	TRUE	1.7769e-07	9.71e-06	TRUE	0.484844	0.713	FALSE
Cnn3	Q9DAW9	-0.337	-0.25	-0.203	0.789	1.23111e-11	6.39e-09	TRUE	2.31407e-11	1.68e-08	TRUE	0.390835	0.634	FALSE
Cntf	P51642	-0.468	0.0436	-0.219	0.643	0.000445426	0.00237	TRUE	1.25464e-05	0.00024	TRUE	0.0660219	0.239	FALSE
Cplx2	P84086	0.204	0.0341	0.0762	-0.314	6.18659e-06	8.1e-05	TRUE	1.68092e-06	5.1e-05	TRUE	0.412183	0.651	FALSE
Cpne1	Q8C166	-0.0417	-0.0894	-0.0804	0.211	2.36211e-06	3.89e-05	TRUE	3.34726e-06	8.86e-05	TRUE	0.823169	0.923	FALSE
Cpne3	Q8BT60	-0.205	-0.0877	0.0115	0.282	6.58171e-06	8.52e-05	TRUE	0.000165055	0.00171	TRUE	0.0834393	0.27	FALSE
Cpne6	Q9Z140	0.0885	0.101	0.0873	-0.277	3.75408e-08	1.56e-06	TRUE	6.01285e-08	4.25e-06	TRUE	0.701319	0.856	FALSE
Cpt1a	P97742	-0.184	-0.16	-0.112	0.456	8.11944e-08	3.04e-06	TRUE	2.23188e-07	1.16e-05	TRUE	0.443668	0.676	FALSE
Cpt2	P52825	-0.218	-0.185	-0.0619	0.465	5.80305e-06	7.71e-05	TRUE	5.39469e-05	0.00072	TRUE	0.206068	0.451	FALSE
Crocc2	F6XLV1	0.137	0.118	0.0241	-0.279	7.05333e-05	0.000552	TRUE	0.000824357	0.00587	TRUE	0.211269	0.457	FALSE
Crtc1	Q68ED7	0.111	0.0169	0.124	-0.252	0.000586764	0.00293	TRUE	2.38245e-05	0.000388	TRUE	0.101055	0.3	FALSE
Cryab	P23927	-0.275	-0.249	-0.16	0.684	6.49869e-11	1.5e-08	TRUE	2.5157e-10	8.31e-08	TRUE	0.119845	0.33	FALSE
Cryzl2	Q3UNZ8	-0.278	-0.28	-0.106	0.664	7.99754e-10	8.8e-08	TRUE	1.14022e-08	1.23e-06	TRUE	0.0193809	0.12	FALSE
Csrp1	P97315	-0.143	-0.152	-0.0752	0.371	6.70446e-09	4.51e-07	TRUE	5.16151e-08	3.87e-06	TRUE	0.0931185	0.286	FALSE
Cst3	P21460	-0.00579	-0.179	-0.0774	0.263	4.31581e-06	6.26e-05	TRUE	7.03425e-05	0.000884	TRUE	0.118601	0.329	FALSE
Ctcf	Q61164	0.419	-0.147	0.23	-0.501	0.00898127	0.0261	TRUE	2.01821e-05	0.000344	TRUE	0.00599009	0.0643	FALSE
Ctnna1	P26231	-0.142	-0.134	-0.0129	0.288	3.18759e-08	1.37e-06	TRUE	1.94052e-06	5.68e-05	TRUE	0.00781391	0.0739	FALSE
Ctsc	P97821	-0.187	-0.214	0.018	0.384	6.50179e-05	0.00052	TRUE	0.0041253	0.0208	TRUE	0.0476873	0.198	FALSE
Ctsd	P18242	-0.286	-0.194	0.00533	0.474	1.23013e-08	6.67e-07	TRUE	9.89e-07	3.42e-05	TRUE	0.00367163	0.0496	FALSE
Cttnbp2nl	Q99LJ0	-0.0813	-0.0645	-0.0616	0.207	0.00436307	0.0145	TRUE	0.00469064	0.0229	TRUE	0.9716	0.99	FALSE
Custos	Q3UY34	0.0325	0.096	0.0909	-0.219	0.00611178	0.019	TRUE	0.00677594	0.0301	TRUE	0.959513	0.986	FALSE
Cxcl5	P50228	-0.915	-0.813	-0.417	2.15	9.92165e-09	5.77e-07	TRUE	6.18809e-08	4.32e-06	TRUE	0.134941	0.353	FALSE
Cyp2d11	P24457	-0.0749	-0.167	-0.15	0.392	8.56199e-09	5.29e-07	TRUE	1.2931e-08	1.34e-06	TRUE	0.711838	0.861	FALSE
Cys1	Q8R4T1	-0.115	0.228	0.217	-0.33	0.0083866	0.0247	TRUE	0.00951189	0.0392	TRUE	0.950457	0.984	FALSE
Dag1	Q62165	-0.0804	-0.0707	-0.107	0.258	7.19826e-07	1.57e-05	TRUE	2.05418e-07	1.1e-05	TRUE	0.374171	0.621	FALSE
Dagla	Q6WQJ1	0.208	0.098	0.0579	-0.364	1.66919e-06	2.94e-05	TRUE	4.71604e-06	0.000115	TRUE	0.508372	0.729	FALSE
Daglb	Q91WC9	-0.136	-0.0601	-0.133	0.329	3.93991e-06	5.85e-05	TRUE	5.36171e-07	2.15e-05	TRUE	0.197491	0.439	FALSE
Dbi	P31786	-0.116	-0.168	-0.0942	0.379	2.37125e-08	1.1e-06	TRUE	1.47875e-07	8.37e-06	TRUE	0.1553	0.384	FALSE
Dcc	P70211	0.0981	0.146	0.0568	-0.301	3.88523e-06	5.78e-05	TRUE	4.32435e-05	0.000604	TRUE	0.167569	0.4	FALSE
Dchs1	E9PVD3	0.14	-0.115	-0.27	0.245	0.00830495	0.0245	TRUE	0.000604335	0.0046	TRUE	0.206664	0.452	FALSE
Ddah1	Q9CWS0	-0.054	-0.0793	-0.133	0.266	1.71509e-05	0.000179	TRUE	3.49131e-06	9.16e-05	TRUE	0.340869	0.59	FALSE
Ddah2	Q99LD8	-0.188	-0.141	-0.0161	0.345	1.52519e-09	1.44e-07	TRUE	7.04117e-08	4.83e-06	TRUE	0.00337064	0.0479	FALSE
Decr1	Q9CQ62	-0.116	-0.155	-0.157	0.428	3.68733e-09	2.91e-07	TRUE	3.56459e-09	5.51e-07	TRUE	0.974016	0.991	FALSE
Dffa	O54786	0.0919	0.25	0.0822	-0.424	0.000845342	0.00394	TRUE	0.00679889	0.0302	TRUE	0.311066	0.558	FALSE
Dgcr8	Q9EQM6	0.079	0.103	0.0589	-0.241	0.000709871	0.00341	TRUE	0.00211028	0.0122	TRUE	0.588379	0.787	FALSE
Dglucy	Q8BH86	-0.123	-0.0642	-0.0496	0.237	1.76512e-05	0.000183	TRUE	2.9761e-05	0.000455	TRUE	0.763829	0.891	FALSE
Dhrs1	Q99L04	-0.304	-0.247	-0.256	0.807	1.34754e-12	1.27e-09	TRUE	1.20421e-12	2.19e-09	TRUE	0.853272	0.941	FALSE
Dkk2	Q9QYZ8	0.122	0.152	0.138	-0.412	0.00191525	0.00753	TRUE	0.00229259	0.013	TRUE	0.929124	0.975	FALSE
Dock1	Q8BUR4	-0.0871	-0.0986	-0.13	0.315	2.36722e-06	3.89e-05	TRUE	1.01463e-06	3.46e-05	TRUE	0.576332	0.778	FALSE
Dock2	Q8C3J5	-0.222	-0.142	-0.161	0.524	3.3631e-07	8.85e-06	TRUE	2.38116e-07	1.21e-05	TRUE	0.800692	0.912	FALSE
Dusp15	Q8R4V2	-0.231	-0.07	-0.0288	0.33	5.56239e-06	7.46e-05	TRUE	1.82471e-05	0.000318	TRUE	0.479949	0.709	FALSE
Dynlt1	P51807	-0.0675	-0.0645	-0.266	0.398	0.000956536	0.00437	TRUE	3.32719e-05	0.000497	TRUE	0.0914064	0.284	FALSE
Echdc2	Q3TLP5	-0.0658	-0.0324	-0.163	0.261	0.00417645	0.014	TRUE	0.000215598	0.00209	TRUE	0.150564	0.376	FALSE
Eef1d	P57776	-0.031	-0.134	-0.0686	0.233	7.27802e-08	2.77e-06	TRUE	7.89255e-07	2.89e-05	TRUE	0.0939149	0.287	FALSE
Efemp1	Q8BPB5	-0.0883	-0.358	-0.163	0.609	9.86453e-07	1.95e-05	TRUE	1.26833e-05	0.000242	TRUE	0.121021	0.332	FALSE
Efnb1	P52795	-0.0453	0.129	0.103	-0.187	0.00739052	0.0223	TRUE	0.012148	0.0472	TRUE	0.806276	0.915	FALSE
Egfr	Q01279	0.0301	-0.0453	-0.216	0.231	0.00136558	0.00578	TRUE	1.51623e-05	0.000275	TRUE	0.0277071	0.143	FALSE
Eif2ak2	Q03963	0.0331	-0.458	-0.09	0.515	1.1105e-06	2.14e-05	TRUE	0.000176697	0.0018	TRUE	0.0083246	0.0765	FALSE
Eif4e3	Q9DBB5	0.0314	-0.411	-0.0447	0.425	1.82883e-05	0.000187	TRUE	0.00318826	0.0169	TRUE	0.0149636	0.103	FALSE
Elmo1	Q8BPU7	-0.162	-0.131	-0.0507	0.344	1.46554e-07	4.63e-06	TRUE	1.36792e-06	4.36e-05	TRUE	0.127044	0.341	FALSE
Elmo3	Q8BYZ7	-0.345	-0.0106	-0.3	0.656	0.000325283	0.00186	TRUE	8.75893e-06	0.000183	TRUE	0.0597594	0.227	FALSE
Elovl5	Q8BHI7	-0.0781	-0.244	-0.14	0.463	2.08599e-07	6.04e-06	TRUE	1.40571e-06	4.44e-05	TRUE	0.192345	0.434	FALSE
Enc1	O35709	0.189	0.0704	0.0307	-0.29	6.17783e-05	0.000499	TRUE	0.000190882	0.0019	TRUE	0.546436	0.757	FALSE
Epb41l2	O70318	-0.168	-0.124	-0.059	0.351	7.41398e-10	8.69e-08	TRUE	5.14409e-09	6.57e-07	TRUE	0.0678977	0.242	FALSE
Epha4	Q03137	0.165	0.177	0.0106	-0.352	9.73694e-06	0.000115	TRUE	0.00040967	0.00342	TRUE	0.0538846	0.213	FALSE
Epha6	Q62413	0.124	0.0419	0.0583	-0.224	1.0555e-05	0.000123	TRUE	5.44857e-06	0.000127	TRUE	0.688183	0.851	FALSE
Epha7	Q61772	0.164	0.173	-0.00826	-0.329	8.91735e-06	0.000108	TRUE	0.000703036	0.00519	TRUE	0.0286398	0.146	FALSE
Ephx2	P34914	-0.155	-0.148	-0.0581	0.361	2.24424e-10	3.47e-08	TRUE	2.93899e-09	4.85e-07	TRUE	0.0145512	0.102	FALSE
Epn1	Q80VP1	0.00762	0.0669	0.127	-0.201	0.00181564	0.00722	TRUE	0.000343513	0.00299	TRUE	0.406733	0.647	FALSE
Erap1	Q9EQH2	-0.0573	-0.173	-0.091	0.322	1.44094e-08	7.53e-07	TRUE	1.43079e-07	8.18e-06	TRUE	0.0759609	0.257	FALSE
Erbin	Q80TH2	-0.129	-0.134	-0.109	0.373	1.45182e-07	4.63e-06	TRUE	2.68495e-07	1.33e-05	TRUE	0.64683	0.826	FALSE
Erc2	Q6PH08	0.139	0.103	0.0419	-0.284	8.89629e-10	9.65e-08	TRUE	8.46226e-09	9.76e-07	TRUE	0.0409752	0.18	FALSE
Ermn	Q5EBJ4	-0.225	-0.186	0.0211	0.39	2.7425e-08	1.24e-06	TRUE	5.80798e-06	0.000134	TRUE	0.00147205	0.0326	FALSE
Ezr	P26040	-0.136	-0.193	-0.0271	0.356	1.59799e-07	4.94e-06	TRUE	1.06977e-05	0.000213	TRUE	0.0120973	0.0921	FALSE
F3	P20352	-0.0954	-0.0352	-0.142	0.273	0.00298355	0.0107	TRUE	0.000265302	0.00244	TRUE	0.234742	0.483	FALSE
Faah	O08914	0.123	0.128	0.0316	-0.282	7.97227e-09	5.04e-07	TRUE	2.33748e-07	1.2e-05	TRUE	0.0132461	0.0972	FALSE
Fabp7	P51880	-0.128	-0.0938	-0.0733	0.295	6.68703e-05	0.000532	TRUE	0.000113959	0.00128	TRUE	0.772644	0.895	FALSE
Fah	P35505	-0.295	-0.21	-0.00725	0.512	6.444e-09	4.38e-07	TRUE	4.08983e-07	1.81e-05	TRUE	0.00389712	0.0502	FALSE
Fam114a1	Q9D281	-0.154	-0.117	-0.0803	0.351	0.000110025	0.000795	TRUE	0.000237352	0.00224	TRUE	0.684626	0.849	FALSE
Fam81a	Q3UXZ6	0.0657	0.171	0.0239	-0.26	3.80507e-07	9.7e-06	TRUE	4.12142e-05	0.000585	TRUE	0.00911229	0.0806	FALSE
Farp1	F8VPU2	-0.133	-0.0815	-0.129	0.343	2.46382e-06	4e-05	TRUE	7.08538e-07	2.64e-05	TRUE	0.409949	0.649	FALSE
Fat3	Q8BNA6	0.121	0.118	0.0167	-0.255	1.29471e-05	0.000144	TRUE	0.000301411	0.0027	TRUE	0.0985312	0.296	FALSE
Fbxo41	Q6NS60	0.187	0.128	0.0108	-0.326	2.03187e-08	9.65e-07	TRUE	8.14134e-07	2.94e-05	TRUE	0.0117291	0.0909	FALSE
Fcer1g	P20491	-0.164	-0.398	-0.121	0.683	0.00166735	0.00674	TRUE	0.0119842	0.0469	TRUE	0.338765	0.588	FALSE
Fcgr1	P26151	0.0317	-0.222	-0.121	0.311	0.00140878	0.00592	TRUE	0.00629805	0.0286	TRUE	0.464278	0.697	FALSE
Fcgr2	P08101	-0.25	-0.251	-0.261	0.762	6.27084e-05	0.000506	TRUE	5.64731e-05	0.00074	TRUE	0.953935	0.985	FALSE
Fdps	Q920E5	0.0805	0.108	0.158	-0.347	6.34945e-09	4.35e-07	TRUE	1.59399e-09	2.97e-07	TRUE	0.193374	0.435	FALSE
Fermt3	Q8K1B8	-0.231	-0.195	0.0222	0.403	4.77434e-07	1.15e-05	TRUE	6.99747e-05	0.000881	TRUE	0.00698288	0.069	FALSE
Fgfr1	P16092	0.0198	-0.0997	-0.145	0.225	0.000683745	0.00331	TRUE	0.000216203	0.00209	TRUE	0.556112	0.764	FALSE
Fhad1	A6PWD2	-0.716	-0.51	0.0374	1.19	2.25742e-07	6.43e-06	TRUE	1.97245e-05	0.00034	TRUE	0.0098574	0.0834	FALSE
Fhl2	O70433	0.0271	0.0824	0.107	-0.216	8.02068e-05	0.000613	TRUE	3.65507e-05	0.000533	TRUE	0.664383	0.837	FALSE
Fig4	Q91WF7	0.166	0.255	0.127	-0.547	0.000472907	0.00248	TRUE	0.00193331	0.0114	TRUE	0.483422	0.712	FALSE
Fkbp10	Q61576	-0.0909	-0.11	-0.0335	0.234	0.000849552	0.00396	TRUE	0.00540583	0.0256	TRUE	0.366356	0.612	FALSE
Flnb	Q80X90	-0.202	-0.237	-0.0403	0.48	9.43577e-10	9.93e-08	TRUE	6.02704e-08	4.25e-06	TRUE	0.00158679	0.034	FALSE
Flnc	Q8VHX6	-0.468	-0.427	-0.137	1.03	1.73588e-10	2.95e-08	TRUE	3.28174e-09	5.3e-07	TRUE	0.00638902	0.0661	FALSE
Fmn2	Q9JL04	0.0553	0.121	0.0775	-0.253	0.000223066	0.0014	TRUE	0.000656769	0.00491	TRUE	0.580583	0.781	FALSE
Folh1	O35409	-0.212	-0.0936	0.0146	0.291	6.96534e-06	8.92e-05	TRUE	0.000203908	0.00201	TRUE	0.0725064	0.25	FALSE
Fra10ac1	Q8BP78	0.215	0.0387	0.148	-0.401	0.0122735	0.0335	TRUE	0.00297143	0.016	TRUE	0.488402	0.714	FALSE
Frat1	P70339	0.162	0.16	0.226	-0.548	0.00193658	0.00759	TRUE	0.000960906	0.00662	TRUE	0.727572	0.869	FALSE
Frmd8	Q3UFK8	-0.204	-0.0227	-0.175	0.402	9.99783e-07	1.96e-05	TRUE	2.3036e-08	2.06e-06	TRUE	0.0109772	0.0883	FALSE
Ftl1	P29391	-0.124	-0.306	-0.0686	0.499	4.06954e-05	0.000355	TRUE	0.00101209	0.00688	TRUE	0.106404	0.308	FALSE
Fundc1	Q9DB70	0.207	0.0262	0.0433	-0.276	0.0154606	0.0403	TRUE	0.0113726	0.045	TRUE	0.878777	0.955	FALSE
Fuom	Q8R2K1	-0.0218	-0.135	-0.0546	0.211	4.84246e-05	0.000408	TRUE	0.000572883	0.00442	TRUE	0.20349	0.448	FALSE
G6pdx	Q00612	-0.172	-0.162	-0.0711	0.405	3.76443e-10	5.29e-08	TRUE	3.7814e-09	5.61e-07	TRUE	0.0288343	0.147	FALSE
Gab1	Q9QYY0	-0.131	-0.139	-0.0407	0.311	1.2846e-06	2.39e-05	TRUE	2.03371e-05	0.000346	TRUE	0.101798	0.301	FALSE
Gabra5	Q8BHJ7	0.0971	0.066	0.0703	-0.233	0.000837393	0.00391	TRUE	0.000744015	0.00543	TRUE	0.952486	0.984	FALSE
Gabrd	P22933	0.347	0.065	-0.00213	-0.41	2.88362e-06	4.52e-05	TRUE	1.56206e-05	0.000282	TRUE	0.309549	0.557	FALSE
Galk1	Q9R0N0	-0.109	-0.0366	-0.0927	0.238	0.00285931	0.0104	TRUE	0.000669933	0.00499	TRUE	0.473627	0.704	FALSE
Galm	Q8K157	-0.255	-0.194	-0.0152	0.465	0.000538151	0.00273	TRUE	0.00585928	0.0272	TRUE	0.246599	0.495	FALSE
Ganc	Q8BVW0	-0.102	-0.146	-0.0521	0.3	2.88665e-05	0.000271	TRUE	0.000289178	0.00262	TRUE	0.223671	0.473	FALSE
Gap43	P06837	-0.00697	0.128	0.166	-0.287	0.00224606	0.00854	TRUE	0.00114473	0.00753	TRUE	0.738271	0.875	FALSE
Gbp1	Q01514	-0.015	-0.0929	-0.175	0.283	0.0162465	0.042	TRUE	0.00499442	0.024	TRUE	0.562321	0.768	FALSE
Gbp5	Q8CFB4	-0.219	-0.228	-0.17	0.617	2.8732e-05	0.00027	TRUE	5.93077e-05	0.000769	TRUE	0.685403	0.849	FALSE
Ggact	Q923B0	-0.157	-0.205	-0.0428	0.406	8.43232e-09	5.28e-07	TRUE	4.10425e-07	1.81e-05	TRUE	0.00640799	0.0661	FALSE
Ggct	Q9D7X8	-0.0101	0.276	0.0299	-0.295	0.000149844	0.00103	TRUE	0.0111143	0.0442	TRUE	0.0444102	0.19	FALSE
Ggt5	Q9Z2A9	0.0266	-0.132	-0.196	0.301	0.0175712	0.0447	TRUE	0.00805286	0.0345	TRUE	0.699511	0.856	FALSE
Gja1	P23242	-0.211	-0.154	-0.178	0.544	1.01903e-10	2.12e-08	TRUE	6.47749e-11	2.94e-08	TRUE	0.576822	0.778	FALSE
Gjb6	P70689	-0.274	-0.112	-0.0652	0.451	1.68695e-07	5.13e-06	TRUE	4.83131e-07	2.02e-05	TRUE	0.446146	0.679	FALSE
Gldc	Q91W43	-0.0621	-0.0967	-0.0664	0.225	3.15392e-07	8.39e-06	TRUE	1.03146e-06	3.49e-05	TRUE	0.41096	0.649	FALSE
Glipr2	Q9CYL5	-0.426	-0.375	-0.301	1.1	3.84044e-10	5.29e-08	TRUE	7.6624e-10	1.99e-07	TRUE	0.455866	0.69	FALSE
Glo1	Q9CPU0	-0.143	-0.169	0.00628	0.306	2.98692e-05	0.000279	TRUE	0.00190683	0.0113	TRUE	0.0429939	0.187	FALSE
Glrx5	Q80Y14	0.0309	0.203	0.0571	-0.291	1.93136e-05	0.000197	TRUE	0.000560816	0.00435	TRUE	0.0846957	0.273	FALSE
Gltp	Q9JL62	-0.194	-0.141	-0.129	0.463	4.52785e-08	1.83e-06	TRUE	5.84661e-08	4.21e-06	TRUE	0.835635	0.93	FALSE
Gna13	P27601	-0.107	-0.081	-0.0831	0.271	1.79401e-08	8.87e-07	TRUE	1.65742e-08	1.65e-06	TRUE	0.945063	0.981	FALSE
Gng12	Q9DAS9	-0.105	-0.0602	-0.0598	0.225	0.000197139	0.00127	TRUE	0.000199929	0.00197	TRUE	0.994106	0.997	FALSE
Gng2	P63213	-0.00802	0.108	0.0824	-0.182	0.000608746	0.00301	TRUE	0.00128971	0.00826	TRUE	0.706571	0.858	FALSE
Gorab	Q8BRM2	0.0862	0.0498	0.125	-0.261	0.0153984	0.0402	TRUE	0.00407473	0.0205	TRUE	0.514895	0.733	FALSE
Gpam	Q61586	0.116	-0.111	-0.237	0.232	0.00259399	0.00955	TRUE	0.0001945	0.00193	TRUE	0.202566	0.446	FALSE
Gpc1	Q9QZF2	0.0755	0.0705	0.147	-0.293	2.01008e-08	9.61e-07	TRUE	1.67607e-09	2.97e-07	TRUE	0.0329918	0.159	FALSE
Gpc4	P51655	0.171	0.0766	0.0314	-0.279	8.06277e-06	0.0001	TRUE	3.44286e-05	0.00051	TRUE	0.401586	0.643	FALSE
Gpm6a	P35802	0.0649	0.171	0.0683	-0.304	5.50804e-07	1.28e-05	TRUE	9.02611e-06	0.000187	TRUE	0.084851	0.273	FALSE
Gpnmb	Q99P91	-0.902	-0.309	0.117	1.09	0.000711608	0.00342	TRUE	0.00953246	0.0392	TRUE	0.21156	0.457	FALSE
Gpr37	Q9QY42	-0.124	-0.0506	-0.0656	0.241	0.00108319	0.0048	TRUE	0.000716341	0.00527	TRUE	0.835451	0.93	FALSE
Gpr37l1	Q99JG2	-0.122	-0.0546	-0.172	0.348	8.62736e-06	0.000106	TRUE	4.50674e-07	1.95e-05	TRUE	0.0687632	0.244	FALSE
Gprc5b	Q923Z0	-0.119	-0.155	-0.0699	0.345	4.09297e-06	6.01e-05	TRUE	3.14041e-05	0.000474	TRUE	0.235899	0.483	FALSE
Gprin1	Q3UNH4	0.0974	0.191	0.0913	-0.38	2.82697e-06	4.46e-05	TRUE	2.34314e-05	0.000383	TRUE	0.212141	0.458	FALSE
Gpt2	Q8BGT5	-0.0428	-0.159	-0.0594	0.261	2.16895e-06	3.63e-05	TRUE	4.14094e-05	0.000585	TRUE	0.0915765	0.284	FALSE
Grcc10	O35127	0.037	0.0763	0.0995	-0.213	7.89845e-05	0.000605	TRUE	3.62403e-05	0.000532	TRUE	0.666943	0.839	FALSE
Gria1	P23818	0.0973	0.0919	0.0588	-0.248	2.95126e-05	0.000277	TRUE	8.35581e-05	0.001	TRUE	0.565087	0.771	FALSE
Gria2	P23819	0.121	0.103	0.0347	-0.259	2.74888e-08	1.24e-06	TRUE	3.75139e-07	1.7e-05	TRUE	0.0567257	0.22	FALSE
Grik5	Q61626	0.125	0.215	0.0108	-0.351	8.98513e-08	3.23e-06	TRUE	1.67509e-05	0.000296	TRUE	0.00286867	0.0449	FALSE
Grm7	Q68ED2	0.147	0.185	-0.0341	-0.298	1.16806e-07	3.95e-06	TRUE	0.000103128	0.00118	TRUE	0.000560714	0.0204	FALSE
Grn	P28798	-0.225	-0.247	-0.0534	0.526	9.82926e-07	1.95e-05	TRUE	2.4949e-05	0.000397	TRUE	0.0589727	0.225	FALSE
Gsdmd	Q9D8T2	-0.203	-0.149	-0.141	0.493	1.15327e-05	0.000131	TRUE	1.33666e-05	0.000252	TRUE	0.930207	0.976	FALSE
Gsn	P13020	-0.186	-0.235	-0.0921	0.513	9.73015e-11	2.12e-08	TRUE	1.65218e-09	2.97e-07	TRUE	0.00619878	0.0651	FALSE
Gsta4	P24472	-0.0622	0.121	0.105	-0.164	0.00761636	0.0229	TRUE	0.0107942	0.0431	TRUE	0.863399	0.946	FALSE
Gstk1	Q9DCM2	-0.115	-0.128	-0.0946	0.338	6.90537e-08	2.64e-06	TRUE	1.74046e-07	9.58e-06	TRUE	0.477581	0.707	FALSE
Gstm1	P10649	-0.0874	-0.102	-0.0524	0.242	2.8658e-05	0.00027	TRUE	0.000136597	0.00148	TRUE	0.395958	0.639	FALSE
Gstm2	P15626	-0.137	-0.172	-0.0057	0.315	8.54654e-07	1.75e-05	TRUE	8.19869e-05	0.000991	TRUE	0.0133366	0.0974	FALSE
Gstt1	Q64471	-0.195	-0.204	0.041	0.358	1.81342e-08	8.89e-07	TRUE	1.63051e-05	0.00029	TRUE	0.000217111	0.013	FALSE
Gstt3	Q99L20	-0.164	-0.233	-0.0702	0.468	4.92459e-07	1.17e-05	TRUE	1.03747e-05	0.000208	TRUE	0.0628957	0.233	FALSE
Gvin1	Q80SU7	-0.089	-0.162	-0.149	0.399	6.52936e-05	0.000521	TRUE	8.20095e-05	0.000991	TRUE	0.900845	0.962	FALSE
H2-D1	P01899	-0.242	-0.316	-0.0106	0.568	9.37555e-06	0.000112	TRUE	0.000594439	0.00455	TRUE	0.0358556	0.166	FALSE
H2-D1.1	P14426	0.182	0.184	0.00307	-0.369	0.000693897	0.00335	TRUE	0.0114482	0.0452	TRUE	0.179089	0.415	FALSE
H2-K1	P01901	-0.272	-0.388	-0.223	0.883	9.79524e-09	5.77e-07	TRUE	5.72805e-08	4.16e-06	TRUE	0.147084	0.37	FALSE
Hace1	Q3U0D9	0.0641	0.0592	0.101	-0.225	0.000307352	0.00178	TRUE	8.32121e-05	0.001	TRUE	0.49214	0.717	FALSE
Hacl1	Q9QXE0	-0.049	-0.043	-0.133	0.225	0.0196931	0.0488	TRUE	0.00338957	0.0177	TRUE	0.390707	0.634	FALSE
Hadh	Q61425	-0.119	-0.0757	-0.0441	0.239	0.000423427	0.00228	TRUE	0.00103377	0.00697	TRUE	0.652442	0.83	FALSE
Hadha	Q8BMS1	-0.111	-0.0814	-0.101	0.293	1.39525e-06	2.57e-05	TRUE	7.66389e-07	2.83e-05	TRUE	0.685202	0.849	FALSE
Hadhb	Q99JY0	-0.104	-0.145	-0.0659	0.315	1.73057e-08	8.67e-07	TRUE	1.85389e-07	1.01e-05	TRUE	0.0711262	0.248	FALSE
Hapln1	Q9QUP5	-0.126	-0.103	-0.0582	0.287	5.94256e-07	1.34e-05	TRUE	2.47783e-06	6.95e-05	TRUE	0.344675	0.592	FALSE
Hapln3	Q80WM5	-0.31	-0.123	0.00749	0.426	2.41188e-05	0.000236	TRUE	0.000340717	0.00297	TRUE	0.165152	0.396	FALSE
Hddc3	Q9D114	-0.202	-0.364	-0.245	0.811	5.27838e-06	7.21e-05	TRUE	1.68757e-05	0.000297	TRUE	0.487932	0.714	FALSE
Hecw1	Q8K4P8	0.226	0.199	0.0371	-0.462	1.33059e-06	2.47e-05	TRUE	3.0053e-05	0.000458	TRUE	0.0707682	0.247	FALSE
Hepacam	Q640R3	-0.145	-0.115	-0.0461	0.306	4.9534e-06	6.86e-05	TRUE	3.3791e-05	0.000502	TRUE	0.265768	0.513	FALSE
Hexa	P29416	-0.184	-0.145	-0.063	0.392	1.35154e-09	1.33e-07	TRUE	1.17058e-08	1.23e-06	TRUE	0.053795	0.213	FALSE
Hexb	P20060	-0.293	-0.174	-0.093	0.561	7.91654e-10	8.8e-08	TRUE	3.69522e-09	5.59e-07	TRUE	0.13493	0.353	FALSE
Hexd	Q3U4H6	0.256	0.163	-0.0224	-0.396	0.00010189	0.000746	TRUE	0.00305316	0.0163	TRUE	0.0985335	0.296	FALSE
Hibadh	Q99L13	-0.115	-0.0478	-0.0579	0.22	1.17268e-05	0.000132	TRUE	7.81991e-06	0.000168	TRUE	0.80767	0.916	FALSE
Hmgcs1	Q8JZK9	0.228	0.0819	0.167	-0.477	2.2981e-05	0.000227	TRUE	4.93206e-06	0.000117	TRUE	0.364247	0.61	FALSE
Homer3	Q99JP6	0.0488	0.176	0.105	-0.33	5.12352e-07	1.2e-05	TRUE	3.01017e-06	8.13e-05	TRUE	0.245688	0.494	FALSE
Hpcal4	Q8BGZ1	0.13	0.0559	0.0941	-0.28	4.07488e-06	5.99e-05	TRUE	1.17205e-06	3.85e-05	TRUE	0.422825	0.659	FALSE
Hsd17b11	Q9EQ06	-0.115	-0.133	-0.0211	0.27	3.07499e-08	1.35e-06	TRUE	1.64453e-06	5.04e-05	TRUE	0.00916676	0.0808	FALSE
Hsd17b4	P51660	-0.14	-0.0948	-0.0729	0.307	1.67792e-09	1.52e-07	TRUE	3.49449e-09	5.51e-07	TRUE	0.472736	0.704	FALSE
Hspb8	Q9JK92	-0.239	-0.211	0.02	0.431	3.13569e-08	1.36e-06	TRUE	6.65727e-06	0.000149	TRUE	0.00155988	0.0337	FALSE
Hspg2	Q05793	-0.115	-0.194	0.0103	0.299	6.04444e-06	7.97e-05	TRUE	0.00108701	0.00724	TRUE	0.0115327	0.0904	FALSE
Iah1	Q9DB29	-0.0891	-0.0746	-0.0665	0.23	4.64898e-05	0.000393	TRUE	6.10515e-05	0.000783	TRUE	0.880002	0.955	FALSE
Icam1	P13597	-0.394	-0.487	-0.118	0.999	2.79281e-05	0.000264	TRUE	0.000436573	0.00358	TRUE	0.153581	0.381	FALSE
Icoslg	Q9JHJ8	-0.0174	-0.239	-0.14	0.396	7.26903e-06	9.17e-05	TRUE	4.38994e-05	0.000611	TRUE	0.303423	0.552	FALSE
Idh2	P54071	-0.163	-0.112	-0.0679	0.343	1.00566e-08	5.8e-07	TRUE	3.68582e-08	2.91e-06	TRUE	0.272102	0.52	FALSE
Idi1	P58044	0.0814	0.14	0.157	-0.379	6.97497e-09	4.65e-07	TRUE	4.54789e-09	6.12e-07	TRUE	0.690081	0.852	FALSE
Ifi35	Q9D8C4	-0.234	-0.31	-0.0544	0.599	1.06488e-06	2.06e-05	TRUE	4.12948e-05	0.000585	TRUE	0.0379511	0.172	FALSE
Ifi44l	Q9BDB7	0.256	0.241	0.0321	-0.529	3.22396e-07	8.55e-06	TRUE	1.23854e-05	0.000238	TRUE	0.0286882	0.146	FALSE
Ifitm2	Q99J93	-0.175	-0.208	-0.0652	0.448	9.55652e-05	0.000708	TRUE	0.000865782	0.00612	TRUE	0.262777	0.512	FALSE
Ifitm3	Q9CQW9	-0.0944	-0.228	-0.152	0.475	3.94406e-06	5.85e-05	TRUE	1.3919e-05	0.000259	TRUE	0.446864	0.68	FALSE
Igdcc4	Q9EQS9	-0.183	-0.0322	-0.144	0.359	0.00586545	0.0185	TRUE	0.000934085	0.00649	TRUE	0.370193	0.617	FALSE
Ighv3-6	P18531	-0.288	-0.293	-0.0776	0.659	1.69661e-05	0.000178	TRUE	0.000219341	0.00211	TRUE	0.172169	0.406	FALSE
Igsf11	P0C673	-0.0869	-0.112	-0.0581	0.257	0.000435058	0.00233	TRUE	0.00158863	0.00976	TRUE	0.51734	0.735	FALSE
Igsf21	Q7TNR6	-0.0609	0.195	0.105	-0.239	0.000369822	0.00205	TRUE	0.00241556	0.0136	TRUE	0.353107	0.599	FALSE
Iigp1	Q9QZ85	-0.344	-0.44	0.0746	0.71	6.75669e-05	0.000536	TRUE	0.00819469	0.0349	TRUE	0.0258013	0.137	FALSE
Il33	Q8BVZ5	-0.225	-0.188	-0.156	0.569	2.60449e-06	4.19e-05	TRUE	4.21049e-06	0.000107	TRUE	0.760385	0.889	FALSE
Ilk	O55222	-0.0764	-0.195	-0.0218	0.293	1.75936e-07	5.28e-06	TRUE	2.66492e-05	0.000419	TRUE	0.00474891	0.056	FALSE
Inmt	P40936	-0.114	-0.154	-0.212	0.48	0.00868135	0.0254	TRUE	0.00500362	0.024	TRUE	0.786466	0.903	FALSE
Iqgap1	Q9JKF1	-0.139	-0.221	-0.0267	0.387	7.09674e-06	9.06e-05	TRUE	0.000340332	0.00297	TRUE	0.0448841	0.191	FALSE
Irgm1	Q60766	-0.358	-0.357	-0.127	0.842	7.18284e-09	4.69e-07	TRUE	1.08085e-07	6.71e-06	TRUE	0.0349144	0.164	FALSE
Irgq	Q8VIM9	0.0689	0.145	0.0378	-0.252	1.66957e-06	2.94e-05	TRUE	5.19695e-05	0.000698	TRUE	0.0527914	0.21	FALSE
Isg20	Q9JL16	-0.427	-0.243	0.0551	0.615	4.06641e-05	0.000355	TRUE	0.00185988	0.0111	TRUE	0.0612285	0.23	FALSE
Islr2	Q5RKR3	0.184	0.151	-0.0226	-0.313	3.58184e-06	5.38e-05	TRUE	0.00041984	0.00349	TRUE	0.0157457	0.107	FALSE
Itga6	Q61739	-0.0763	-0.0625	-0.134	0.272	4.69403e-06	6.66e-05	TRUE	4.98011e-07	2.06e-05	TRUE	0.151249	0.377	FALSE
Itgam	P05555	-0.233	-0.301	-0.0927	0.627	3.49039e-11	1.07e-08	TRUE	1.05639e-09	2.48e-07	TRUE	0.00113464	0.0288	FALSE
Itgax	Q9QXH4	-0.125	-0.189	-0.189	0.504	0.00458851	0.0151	TRUE	0.00458856	0.0225	TRUE	0.999995	1	FALSE
Itgb1	P09055	-0.0752	-0.224	-0.0663	0.366	2.66043e-09	2.22e-07	TRUE	1.42218e-07	8.18e-06	TRUE	0.00342753	0.0479	FALSE
Itgb2	P11835	-0.285	-0.346	-0.149	0.78	2.90377e-11	1.03e-08	TRUE	3.91829e-10	1.24e-07	TRUE	0.00604356	0.0645	FALSE
Itgb5	O70309	0.0118	-0.0525	-0.2	0.24	0.00245709	0.00914	TRUE	7.26959e-05	0.000906	TRUE	0.0859153	0.275	FALSE
Itih5	Q8BJD1	-0.0874	-0.0946	-0.115	0.297	0.00322697	0.0114	TRUE	0.00221798	0.0127	TRUE	0.853347	0.941	FALSE
Itpka	Q8R071	0.115	0.0857	0.0598	-0.26	1.88171e-07	5.56e-06	TRUE	4.84263e-07	2.02e-05	TRUE	0.494259	0.718	FALSE
Itpr2	Q9Z329	-0.0792	-0.0635	-0.118	0.261	1.97244e-06	3.39e-05	TRUE	3.08578e-07	1.47e-05	TRUE	0.213355	0.46	FALSE
Jak1	P52332	-0.0821	-0.0893	-0.0743	0.246	2.03786e-05	0.000204	TRUE	3.29097e-05	0.000494	TRUE	0.783975	0.902	FALSE
Jam2	Q9JI59	-0.136	-0.022	-0.131	0.289	0.00103449	0.00463	TRUE	6.90622e-05	0.000873	TRUE	0.172417	0.406	FALSE
Jph3	Q9ET77	0.115	0.171	0.00355	-0.289	0.00034912	0.00196	TRUE	0.00995645	0.0404	TRUE	0.110957	0.315	FALSE
Kcnh1	Q60603	0.0364	-0.126	-0.138	0.227	0.00412502	0.0139	TRUE	0.00331603	0.0174	TRUE	0.914465	0.968	FALSE
Kcnip4	Q6PHZ8	0.118	0.115	0.0359	-0.269	0.000426655	0.0023	TRUE	0.00269475	0.0149	TRUE	0.362824	0.609	FALSE
Kcnj10	Q9JM63	-0.244	0.0393	-0.126	0.331	0.000863481	0.00402	TRUE	1.15907e-05	0.000227	TRUE	0.0318043	0.155	FALSE
Kcnj4	P52189	0.179	0.0739	0.0126	-0.265	0.000350788	0.00197	TRUE	0.0018169	0.0109	TRUE	0.412462	0.651	FALSE
Kctd4	Q9D7X1	0.19	0.147	0.0299	-0.367	1.1436e-07	3.91e-06	TRUE	2.51292e-06	7.02e-05	TRUE	0.0431529	0.187	FALSE
Kiaa1549	Q68FD9	0.136	0.11	0.0371	-0.283	4.86545e-08	1.94e-06	TRUE	6.08378e-07	2.36e-05	TRUE	0.0723553	0.25	FALSE
Klc3	Q91W40	-0.0123	-0.106	-0.128	0.247	0.000170875	0.00114	TRUE	9.6175e-05	0.00112	TRUE	0.759074	0.888	FALSE
Klhdc7a	A2APT9	-0.0613	-0.101	-0.0683	0.23	0.000433222	0.00232	TRUE	0.00102995	0.00695	TRUE	0.662154	0.837	FALSE
Klhl26	Q8BGY4	0.0706	0.0656	0.099	-0.235	0.0159516	0.0413	TRUE	0.00873501	0.0367	TRUE	0.765611	0.892	FALSE
Krt73	Q6NXH9	-0.2	-0.19	-0.197	0.586	0.000164463	0.00111	TRUE	0.000151089	0.0016	TRUE	0.964129	0.988	FALSE
Lap3	Q9CPY7	-0.23	-0.136	-0.106	0.472	3.847e-08	1.57e-06	TRUE	7.40204e-08	4.95e-06	TRUE	0.597649	0.793	FALSE
Lcp1	Q61233	-0.274	-0.274	-0.0857	0.634	2.37582e-11	9.59e-09	TRUE	5.4666e-10	1.53e-07	TRUE	0.0016662	0.0348	FALSE
Lgals3	P16110	-0.393	-0.422	-0.109	0.924	7.30079e-07	1.58e-05	TRUE	1.47604e-05	0.00027	TRUE	0.0711411	0.248	FALSE
Lgals9	O08573	-0.192	-0.141	-0.0881	0.421	2.00627e-05	0.000202	TRUE	5.548e-05	0.000734	TRUE	0.567008	0.772	FALSE
Lgi3	Q8K406	-0.265	-0.0863	0.0414	0.31	3.94845e-05	0.000346	TRUE	0.00135778	0.00864	TRUE	0.0792753	0.263	FALSE
Lgi4	Q8K1S1	-0.233	-0.0777	-0.0461	0.357	0.000264004	0.00158	TRUE	0.000515796	0.00407	TRUE	0.730728	0.871	FALSE
Lgmn	O89017	-0.207	-0.133	-0.0444	0.384	0.000107937	0.000783	TRUE	0.000593227	0.00454	TRUE	0.380585	0.627	FALSE
Lims1	Q99JW4	-0.102	-0.082	-0.043	0.227	0.000136495	0.000948	TRUE	0.000466984	0.00378	TRUE	0.524208	0.74	FALSE
Llgl1	Q80Y17	-0.115	-0.0477	-0.102	0.265	3.8176e-07	9.7e-06	TRUE	5.26336e-08	3.9e-06	TRUE	0.14555	0.368	FALSE
Lmf2	Q8C3X8	0.122	-0.368	-0.239	0.485	8.80349e-07	1.79e-05	TRUE	5.80216e-06	0.000134	TRUE	0.232522	0.48	FALSE
Lpcat2	Q8BYI6	-0.131	-0.361	-0.132	0.624	3.53273e-11	1.07e-08	TRUE	1.2321e-09	2.56e-07	TRUE	0.000851557	0.0263	FALSE
Lrfn1	Q2WF71	0.0364	0.0867	0.0909	-0.214	0.000155949	0.00106	TRUE	0.000136446	0.00148	TRUE	0.94336	0.981	FALSE
Lrfn4	Q80XU8	0.0749	0.0919	0.0715	-0.238	0.00205825	0.00797	TRUE	0.0032739	0.0172	TRUE	0.81901	0.921	FALSE
Lrrc20	Q8CI70	-0.0439	0.106	0.112	-0.175	0.00145581	0.00608	TRUE	0.00123913	0.00802	TRUE	0.936014	0.979	FALSE
Lrrtm4	Q80XG9	0.165	0.227	-0.000933	-0.392	2.18112e-06	3.63e-05	TRUE	0.000262518	0.00242	TRUE	0.0135223	0.0982	FALSE
Lsamp	Q8BLK3	-0.0422	0.158	0.142	-0.258	1.40414e-05	0.000153	TRUE	2.15327e-05	0.000363	TRUE	0.803105	0.913	FALSE
Lurap1l	Q8K2P1	0.206	0.273	0.0673	-0.547	7.09526e-05	0.000555	TRUE	0.000971868	0.00667	TRUE	0.185933	0.424	FALSE
Lxn	P70202	-0.0718	-0.134	-0.0612	0.267	1.4787e-06	2.7e-05	TRUE	1.40687e-05	0.000261	TRUE	0.173023	0.407	FALSE
Lyn	P25911	-0.0808	-0.137	-0.0501	0.268	1.99802e-06	3.42e-05	TRUE	2.87366e-05	0.000443	TRUE	0.12005	0.331	FALSE
Lypd1	Q8BLC3	0.125	0.0625	0.129	-0.317	0.00777706	0.0232	TRUE	0.00260819	0.0145	TRUE	0.592675	0.789	FALSE
Lysmd2	Q9D7V2	0.0284	0.0865	0.102	-0.217	0.000374124	0.00207	TRUE	0.000239599	0.00225	TRUE	0.81748	0.92	FALSE
Maob	Q8BW75	-0.0468	-0.173	-0.0665	0.286	8.14938e-07	1.7e-05	TRUE	1.60362e-05	0.000288	TRUE	0.074793	0.255	FALSE
Mapk14	P47811	0.0226	-0.121	-0.111	0.209	3.10008e-05	0.000287	TRUE	4.311e-05	0.000604	TRUE	0.852641	0.941	FALSE
Mavs	Q8VCF0	-0.19	-0.0925	-0.0211	0.304	4.07948e-05	0.000355	TRUE	0.000278955	0.00255	TRUE	0.309282	0.557	FALSE
Mbnl1	Q9JKP5	0.00593	-0.131	-0.074	0.199	7.73559e-05	0.000596	TRUE	0.000455427	0.00371	TRUE	0.357258	0.603	FALSE
Med23	Q80YQ2	0.0539	0.0932	0.0991	-0.246	0.0018767	0.00741	TRUE	0.00164637	0.0101	TRUE	0.948229	0.983	FALSE
Mical1	Q8VDP3	-0.151	-0.119	-0.125	0.396	4.93708e-08	1.95e-06	TRUE	4.25948e-08	3.25e-06	TRUE	0.903887	0.964	FALSE
Micall1	Q8BGT6	-0.0794	-0.0743	-0.0972	0.251	0.000177103	0.00117	TRUE	9.21996e-05	0.00109	TRUE	0.727685	0.869	FALSE
Micall2	Q3TN34	-0.124	-0.201	-0.0866	0.411	9.25615e-05	0.00069	TRUE	0.000610939	0.00464	TRUE	0.331924	0.581	FALSE
Mlc1	Q8VHK5	-0.237	-0.0799	-0.213	0.531	2.03938e-09	1.72e-07	TRUE	1.46534e-10	5.33e-08	TRUE	0.0109874	0.0883	FALSE
Mmut	P16332	-0.124	-0.084	-0.0855	0.293	3.37251e-07	8.85e-06	TRUE	3.2131e-07	1.51e-05	TRUE	0.97198	0.99	FALSE
Mpped2	Q9CZJ0	0.0466	0.182	0.0654	-0.294	4.96855e-07	1.17e-05	TRUE	1.23498e-05	0.000238	TRUE	0.0523553	0.209	FALSE
Mpz	P27573	0.109	0.172	0.105	-0.387	0.000969684	0.00441	TRUE	0.00257135	0.0143	TRUE	0.629347	0.814	FALSE
Mrpl41	Q9CQN7	0.0804	0.15	0.0482	-0.279	0.000217517	0.00137	TRUE	0.0021001	0.0122	TRUE	0.261223	0.511	FALSE
Msi1	Q61474	-0.0744	-0.0801	-0.12	0.275	0.000460784	0.00243	TRUE	0.000174768	0.00179	TRUE	0.616158	0.807	FALSE
Msmo1	Q9CRA4	0.227	0.24	-0.00681	-0.461	2.96968e-05	0.000278	TRUE	0.0015635	0.00966	TRUE	0.0515478	0.207	FALSE
Msn	P26041	-0.33	-0.293	-0.0718	0.696	1.50716e-10	2.78e-08	TRUE	4.35833e-09	5.97e-07	TRUE	0.00261698	0.0428	FALSE
Mt2	P02798	-0.0111	-0.627	-0.0959	0.734	8.81918e-07	1.79e-05	TRUE	0.000176762	0.0018	TRUE	0.00605233	0.0645	FALSE
Mtm1	Q9Z2C5	-0.0574	-0.14	-0.0502	0.247	2.34982e-07	6.57e-06	TRUE	5.14924e-06	0.000122	TRUE	0.0512851	0.207	FALSE
Mttp	O08601	-0.11	-0.0852	-0.106	0.302	9.4767e-05	0.000704	TRUE	5.5864e-05	0.000735	TRUE	0.772878	0.895	FALSE
Mug1	P28665	0.0602	-0.204	-0.283	0.427	0.000287516	0.00169	TRUE	9.472e-05	0.0011	TRUE	0.558982	0.766	FALSE
Mvd	Q99JF5	0.086	0.145	0.158	-0.389	7.88691e-05	0.000605	TRUE	6.11385e-05	0.000783	TRUE	0.889063	0.958	FALSE
Mvk	Q9R008	0.0613	0.0851	0.0769	-0.223	0.000791346	0.00373	TRUE	0.000987731	0.00674	TRUE	0.9113	0.967	FALSE
Mvp	Q9EQK5	-0.34	-0.332	-0.091	0.763	1.53055e-10	2.78e-08	TRUE	4.13438e-09	5.97e-07	TRUE	0.00300716	0.0456	FALSE
Myh14	Q6URW6	-0.122	-0.144	-0.0198	0.286	3.68479e-08	1.55e-06	TRUE	2.32836e-06	6.73e-05	TRUE	0.00784651	0.074	FALSE
Myo1c	Q9WTI7	-0.0672	-0.122	-0.0464	0.236	0.000198845	0.00128	TRUE	0.00151757	0.00946	TRUE	0.30942	0.557	FALSE
Myo1d	Q5SYD0	-0.214	-0.134	-0.0156	0.364	4.63635e-07	1.14e-05	TRUE	1.06066e-05	0.000212	TRUE	0.0566293	0.22	FALSE
Myo1e	E9Q634	-0.166	-0.0464	-0.136	0.348	5.62414e-05	0.000464	TRUE	6.48287e-06	0.000147	TRUE	0.221338	0.471	FALSE
Myo6	Q64331	-0.174	-0.109	-0.106	0.389	4.60121e-11	1.21e-08	TRUE	5.04993e-11	2.62e-08	TRUE	0.904983	0.965	FALSE
Myo9b	Q9QY06	0.0567	-0.305	-0.179	0.428	0.000313399	0.0018	TRUE	0.00151713	0.00946	TRUE	0.429889	0.664	FALSE
Nab2	Q61127	0.183	0.148	-0.0216	-0.31	0.000422802	0.00228	TRUE	0.0120623	0.0471	TRUE	0.111642	0.317	FALSE
Naf1	Q3UMQ8	-0.335	0.493	0.508	-0.665	1.06946e-05	0.000124	TRUE	9.30599e-06	0.000192	TRUE	0.933488	0.978	FALSE
Napb	P28663	0.0637	0.0716	0.067	-0.202	1.53515e-06	2.77e-05	TRUE	1.87275e-06	5.53e-05	TRUE	0.895675	0.961	FALSE
Napg	Q9CWZ7	0.014	0.0853	0.0934	-0.193	0.000612182	0.00303	TRUE	0.00047854	0.00384	TRUE	0.900255	0.962	FALSE
Naprt	Q8CC86	-0.227	-0.217	-0.0644	0.508	5.25247e-10	6.47e-08	TRUE	1.15801e-08	1.23e-06	TRUE	0.00756563	0.0723	FALSE
Ncdn	Q9Z0E0	0.131	0.135	0.0435	-0.31	5.52358e-08	2.15e-06	TRUE	9.30317e-07	3.25e-05	TRUE	0.0506661	0.205	FALSE
Nck2	O55033	0.0737	0.0862	0.063	-0.223	7.74251e-05	0.000596	TRUE	0.000164702	0.00171	TRUE	0.685984	0.849	FALSE
Nckap1l	Q8K1X4	-0.00632	-0.28	-0.105	0.391	1.29994e-07	4.29e-06	TRUE	4.59843e-06	0.000114	TRUE	0.0247671	0.134	FALSE
Ndel1	Q9ERR1	-0.00962	0.202	0.0427	-0.235	0.000179033	0.00118	TRUE	0.00637598	0.0288	TRUE	0.0882192	0.279	FALSE
Ndrg1	Q62433	-0.137	-0.0948	-0.0893	0.321	6.70691e-06	8.64e-05	TRUE	7.77143e-06	0.000168	TRUE	0.928385	0.975	FALSE
Ndufa4	Q62425	0.0142	0.113	0.0838	-0.211	0.00167261	0.00676	TRUE	0.00333375	0.0175	TRUE	0.733824	0.873	FALSE
Necap2	Q9D1J1	-0.107	-0.112	-0.131	0.35	0.000258877	0.00156	TRUE	0.000180364	0.00183	TRUE	0.849848	0.939	FALSE
Nedd1	P33215	-0.00969	-0.116	-0.197	0.323	0.000518244	0.00266	TRUE	0.00010955	0.00125	TRUE	0.421975	0.658	FALSE
Negr1	Q80Z24	-0.0387	0.0885	0.171	-0.22	0.00135076	0.00573	TRUE	0.000177516	0.00181	TRUE	0.308596	0.556	FALSE
Nek9	Q8K1R7	-0.00948	-0.1	-0.1	0.21	7.0024e-06	8.96e-05	TRUE	6.96511e-06	0.000154	TRUE	0.997396	0.999	FALSE
Nfkb1	P25799	0.0293	-0.135	-0.0808	0.187	3.64474e-05	0.000324	TRUE	0.000223483	0.00214	TRUE	0.333451	0.582	FALSE
Niban1	Q3UW53	-0.0729	-0.128	-0.0936	0.295	0.000268965	0.00161	TRUE	0.000568271	0.00439	TRUE	0.701347	0.856	FALSE
Niban2	Q8R1F1	-0.186	-0.0959	-0.0904	0.372	3.51016e-05	0.000315	TRUE	3.95823e-05	0.000567	TRUE	0.946064	0.982	FALSE
Nkain1	Q9D035	-0.205	-0.103	-0.131	0.44	0.0108427	0.0303	TRUE	0.0080259	0.0344	TRUE	0.881953	0.956	FALSE
Nlgn3	Q8BYM5	0.0622	0.0881	0.0637	-0.214	2.38394e-05	0.000234	TRUE	5.66868e-05	0.000741	TRUE	0.626884	0.813	FALSE
Nolc1	E9Q5C9	-0.0225	0.352	0.137	-0.466	0.000193459	0.00125	TRUE	0.00244176	0.0137	TRUE	0.211485	0.457	FALSE
Notch2	O35516	-0.00363	-0.116	-0.112	0.232	0.00367847	0.0126	TRUE	0.00397293	0.0201	TRUE	0.969777	0.99	FALSE
Npc2	Q9Z0J0	-0.186	-0.17	-0.0195	0.376	0.000197319	0.00127	TRUE	0.00283478	0.0154	TRUE	0.191095	0.432	FALSE
Npepl1	Q6NSR8	-0.131	-0.131	-0.0198	0.281	9.28582e-06	0.000112	TRUE	0.000223413	0.00214	TRUE	0.0912989	0.284	FALSE
Npl	Q9DCJ9	0.0412	-0.196	-0.246	0.401	9.79908e-07	1.95e-05	TRUE	3.79652e-07	1.71e-05	TRUE	0.510388	0.73	FALSE
Nptx1	Q62443	0.202	0.176	0.0827	-0.46	1.75302e-08	8.72e-07	TRUE	1.28832e-07	7.49e-06	TRUE	0.119192	0.329	FALSE
Nptxr	Q99J85	0.0923	0.155	0.0741	-0.321	1.6984e-05	0.000178	TRUE	0.000112929	0.00127	TRUE	0.298597	0.547	FALSE
Nqo1	Q64669	-0.251	-0.0925	-0.0255	0.369	0.000237124	0.00146	TRUE	0.000924407	0.00643	TRUE	0.490215	0.716	FALSE
Nrn1	Q8CFV4	0.167	0.156	0.227	-0.55	1.79935e-09	1.58e-07	TRUE	5.03263e-10	1.52e-07	TRUE	0.194277	0.436	FALSE
Nrxn3	Q6P9K9	0.085	0.0907	0.0631	-0.239	1.38347e-08	7.28e-07	TRUE	4.22017e-08	3.25e-06	TRUE	0.349709	0.597	FALSE
Nt5e	Q61503	-0.0221	0.335	0.145	-0.458	0.000758559	0.0036	TRUE	0.00577763	0.0269	TRUE	0.322747	0.571	FALSE
Ntm	Q99PJ0	-0.0325	0.134	0.0987	-0.2	0.00299425	0.0107	TRUE	0.00636469	0.0288	TRUE	0.711312	0.861	FALSE
Ntrk3	Q6VNS1	0.0435	0.144	0.0406	-0.228	9.39556e-06	0.000112	TRUE	0.000251553	0.00233	TRUE	0.0826669	0.269	FALSE
Nucks1	Q80XU3	0.339	0.184	0.238	-0.761	0.0103877	0.0293	TRUE	0.00744457	0.0323	TRUE	0.869485	0.95	FALSE
Nudt7	Q99P30	-0.122	-0.229	-0.0937	0.444	0.00108485	0.0048	TRUE	0.00553276	0.026	TRUE	0.42581	0.661	FALSE
Numbl	O08919	-0.00859	0.144	0.071	-0.207	3.1883e-06	4.9e-05	TRUE	4.04351e-05	0.000577	TRUE	0.144663	0.367	FALSE
Nwd2	Q6P5U7	0.177	0.136	0.0057	-0.319	1.52667e-09	1.44e-07	TRUE	1.1726e-07	6.93e-06	TRUE	0.00150386	0.0327	FALSE
Nxn	P97346	-0.199	-0.115	-0.0585	0.373	2.26932e-06	3.76e-05	TRUE	9.15143e-06	0.000189	TRUE	0.389579	0.634	FALSE
Oas1a	P11928	-0.658	-0.271	-0.0329	0.963	1.642e-05	0.000174	TRUE	0.000144176	0.00154	TRUE	0.237997	0.486	FALSE
Oat	P29758	-0.152	-0.125	-0.0763	0.353	3.50501e-10	5.2e-08	TRUE	1.44843e-09	2.92e-07	TRUE	0.143921	0.365	FALSE
Ogfrl1	Q8VE52	0.122	0.111	0.0158	-0.248	0.00019021	0.00124	TRUE	0.00246745	0.0138	TRUE	0.206798	0.452	FALSE
Olfm1	O88998	0.185	0.174	0.0177	-0.377	3.73115e-07	9.54e-06	TRUE	1.69797e-05	0.000298	TRUE	0.0245005	0.134	FALSE
Olfm2	Q8BM13	-0.0324	0.179	0.149	-0.296	0.000952095	0.00436	TRUE	0.0016016	0.00981	TRUE	0.795442	0.909	FALSE
Oplah	Q8K010	-0.166	-0.0993	-0.0787	0.344	2.76645e-09	2.26e-07	TRUE	5.15147e-09	6.57e-07	TRUE	0.55327	0.762	FALSE
Osmr	O70458	-0.19	-0.457	-0.129	0.777	4.41225e-09	3.37e-07	TRUE	2.22095e-07	1.16e-05	TRUE	0.00467828	0.0553	FALSE
Otx1	P80205	0.069	-0.122	-0.209	0.262	0.00048216	0.00252	TRUE	7.1661e-05	0.000898	TRUE	0.323104	0.571	FALSE
P01631	P01631	-0.02	-0.0738	-0.138	0.232	0.00108252	0.0048	TRUE	0.000209019	0.00205	TRUE	0.406173	0.647	FALSE
P01786	P01786	-0.0787	-0.057	-0.196	0.332	0.0104276	0.0294	TRUE	0.00127297	0.00819	TRUE	0.308398	0.556	FALSE
P2rx7	Q9Z1M0	-0.0839	-0.158	-0.0281	0.27	1.37717e-08	7.28e-07	TRUE	1.20859e-06	3.94e-05	TRUE	0.00341551	0.0479	FALSE
P2ry12	Q9CPV9	0.131	0.337	0.00392	-0.471	2.45146e-05	0.000238	TRUE	0.00278213	0.0152	TRUE	0.0239771	0.133	FALSE
Pacsin3	Q99JB8	-0.0956	-0.0756	-0.0872	0.259	0.0019471	0.00762	TRUE	0.00150146	0.0094	TRUE	0.897429	0.961	FALSE
Padi2	Q08642	-0.233	-0.211	-0.127	0.57	4.82499e-09	3.55e-07	TRUE	2.08838e-08	1.92e-06	TRUE	0.200117	0.443	FALSE
Palld	Q9ET54	0.0614	-0.26	-0.121	0.32	0.000775699	0.00367	TRUE	0.00582774	0.0271	TRUE	0.326017	0.574	FALSE
Panx2	Q6IMP4	0.0972	0.0909	0.0443	-0.232	0.000229594	0.00142	TRUE	0.000889804	0.00625	TRUE	0.491622	0.717	FALSE
Papss2	O88428	-0.147	-0.031	-0.0572	0.235	5.74547e-05	0.000471	TRUE	2.18123e-05	0.000366	TRUE	0.586501	0.786	FALSE
Pard3	Q99NH2	-0.0723	-0.0727	-0.144	0.289	0.000661795	0.00323	TRUE	0.000130176	0.00143	TRUE	0.404505	0.645	FALSE
Parp3	Q3ULW8	-0.228	-0.388	-0.11	0.727	8.89911e-06	0.000108	TRUE	0.000168057	0.00173	TRUE	0.113834	0.32	FALSE
Pbxip1	Q3TVI8	-0.277	-0.0783	-0.0126	0.368	1.56858e-06	2.81e-05	TRUE	9.55276e-06	0.000194	TRUE	0.265063	0.513	FALSE
Pcdh8	Q7TSK3	0.0117	0.195	0.0866	-0.293	2.32513e-06	3.85e-05	TRUE	3.62935e-05	0.000532	TRUE	0.113198	0.32	FALSE
Pcdha9	Q91Y11	0.185	0.0509	0.0604	-0.296	3.25118e-05	0.000297	TRUE	2.45446e-05	0.000395	TRUE	0.872664	0.952	FALSE
Pclo	Q9QYX7	0.115	0.0976	0.0853	-0.298	4.04135e-09	3.16e-07	TRUE	6.10737e-09	7.65e-07	TRUE	0.697871	0.855	FALSE
Pdia4	P08003	-0.16	-0.138	-0.00601	0.304	4.16832e-07	1.05e-05	TRUE	2.36116e-05	0.000385	TRUE	0.0196338	0.12	FALSE
Pdlim2	Q8R1G6	-0.151	-0.151	-0.106	0.408	0.00151989	0.00627	TRUE	0.00284107	0.0155	TRUE	0.757327	0.887	FALSE
Pdlim4	P70271	-0.328	-0.319	-0.158	0.804	5.39496e-12	3.56e-09	TRUE	4.45224e-11	2.49e-08	TRUE	0.00984901	0.0834	FALSE
Pdlim5	Q8CI51	-0.175	-0.193	-0.00896	0.377	7.5143e-07	1.61e-05	TRUE	5.58293e-05	0.000735	TRUE	0.0170414	0.112	FALSE
Pgbd5	D3YZI9	0.106	0.155	0.0918	-0.353	1.31162e-07	4.31e-06	TRUE	6.57888e-07	2.52e-05	TRUE	0.25007	0.498	FALSE
Pgm2l1	Q8CAA7	0.104	0.159	0.0412	-0.303	6.54797e-10	7.8e-08	TRUE	2.97945e-08	2.52e-06	TRUE	0.00233165	0.0409	FALSE
Pgm5	Q8BZF8	-0.0759	-0.114	-0.0935	0.283	0.000441757	0.00235	TRUE	0.000692366	0.00512	TRUE	0.819332	0.921	FALSE
Phf24	Q80TL4	0.0837	0.154	0.0149	-0.252	7.30464e-07	1.58e-05	TRUE	7.25772e-05	0.000906	TRUE	0.0122621	0.0925	FALSE
Phlda3	Q9WV95	0.0554	-0.182	-0.152	0.278	0.000703164	0.00339	TRUE	0.00120598	0.00782	TRUE	0.786723	0.904	FALSE
Phldb1	Q6PDH0	-0.218	-0.00743	-0.0302	0.256	0.000277737	0.00164	TRUE	0.000127983	0.00141	TRUE	0.684026	0.849	FALSE
Phyhd1	Q9DB26	-0.271	-0.344	-0.192	0.806	1.85351e-10	3e-08	TRUE	1.2291e-09	2.56e-07	TRUE	0.0522563	0.209	FALSE
Phyhip	Q8K0S0	0.112	0.174	0.0247	-0.311	3.7708e-08	1.56e-06	TRUE	3.24837e-06	8.68e-05	TRUE	0.00528182	0.0589	FALSE
Pip5k1c	O70161	0.155	0.0672	0.041	-0.263	7.84712e-09	5e-07	TRUE	2.2702e-08	2.06e-06	TRUE	0.354819	0.6	FALSE
Pkig	O70139	0.215	0.0336	0.088	-0.337	0.000226943	0.00142	TRUE	6.06915e-05	0.000781	TRUE	0.483052	0.712	FALSE
Plcb3	P51432	-0.111	-0.121	-0.0672	0.299	8.66316e-08	3.16e-06	TRUE	4.63535e-07	1.98e-05	TRUE	0.222346	0.472	FALSE
Plcd1	Q8R3B1	-0.14	-0.0801	-0.0681	0.288	3.36641e-06	5.09e-05	TRUE	4.90029e-06	0.000117	TRUE	0.813494	0.917	FALSE
Plcd4	Q8K3R3	0.184	-0.26	-0.252	0.328	0.00420514	0.0141	TRUE	0.00463601	0.0227	TRUE	0.961739	0.988	FALSE
Pld1	Q9Z280	-0.144	-0.173	-0.0206	0.337	1.63704e-05	0.000174	TRUE	0.000515668	0.00407	TRUE	0.0768013	0.259	FALSE
Pld2	P97813	-0.105	-0.117	-0.133	0.355	4.78509e-07	1.15e-05	TRUE	3.2612e-07	1.52e-05	TRUE	0.783489	0.901	FALSE
Pld3	O35405	0.126	0.125	0.0258	-0.277	4.22201e-05	0.000365	TRUE	0.000598539	0.00457	TRUE	0.173333	0.407	FALSE
Plek	Q9JHK5	-0.133	-0.199	-0.173	0.504	4.28654e-07	1.08e-05	TRUE	6.67555e-07	2.54e-05	TRUE	0.755245	0.886	FALSE
Plekha2	Q9ERS5	0.246	-0.00105	0.0626	-0.308	0.0135413	0.0362	TRUE	0.00422309	0.0211	TRUE	0.567786	0.773	FALSE
Plekhb1	Q9QYE9	-0.246	-0.146	-0.161	0.553	7.62059e-07	1.62e-05	TRUE	5.87202e-07	2.29e-05	TRUE	0.856162	0.942	FALSE
Plin3	Q9DBG5	-0.214	-0.104	0.0216	0.297	2.19049e-05	0.000218	TRUE	0.000776898	0.00563	TRUE	0.0715639	0.249	FALSE
Pllp	Q9DCU2	-0.142	-0.121	-0.0507	0.314	1.74978e-05	0.000182	TRUE	0.000106276	0.00121	TRUE	0.321134	0.569	FALSE
Plppr4	Q7TME0	0.204	0.194	0.0272	-0.425	5.52231e-07	1.28e-05	TRUE	1.93537e-05	0.000335	TRUE	0.0364387	0.168	FALSE
Pls1	Q3V0K9	-0.122	-0.108	-0.0536	0.284	7.60311e-08	2.88e-06	TRUE	4.76597e-07	2.01e-05	TRUE	0.182634	0.419	FALSE
Pltp	P55065	-0.104	-0.0869	-0.0393	0.231	3.34397e-06	5.08e-05	TRUE	2.00121e-05	0.000344	TRUE	0.287648	0.536	FALSE
Plxdc2	Q9DC11	-0.0123	-0.118	-0.174	0.303	2.81352e-05	0.000265	TRUE	7.3459e-06	0.000161	TRUE	0.433723	0.667	FALSE
Plxnb1	Q8CJH3	-0.0534	-0.0583	-0.117	0.228	2.54362e-07	7.08e-06	TRUE	2.51869e-08	2.2e-06	TRUE	0.08347	0.27	FALSE
Plxnb2	B2RXS4	-0.158	-0.0865	-0.0622	0.307	1.17029e-07	3.95e-06	TRUE	2.56809e-07	1.29e-05	TRUE	0.55598	0.764	FALSE
Plxnb3	Q9QY40	0.149	-0.239	-0.125	0.215	0.000710251	0.00341	TRUE	0.00602739	0.0277	TRUE	0.298376	0.547	FALSE
Pml	Q60953	0.0241	-0.231	-0.106	0.313	5.35401e-06	7.28e-05	TRUE	8.35555e-05	0.001	TRUE	0.127224	0.341	FALSE
Pnp	P23492	-0.252	-0.184	-0.113	0.549	4.02343e-10	5.32e-08	TRUE	1.57217e-09	2.97e-07	TRUE	0.162064	0.393	FALSE
Poglut3	G5E897	-0.134	-0.155	-0.0356	0.325	0.000210999	0.00134	TRUE	0.0022884	0.013	TRUE	0.23886	0.487	FALSE
Pon2	Q62086	-0.117	-0.133	-0.0489	0.299	7.472e-07	1.6e-05	TRUE	9.02197e-06	0.000187	TRUE	0.123825	0.336	FALSE
Ppfia3	P60469	0.0412	0.156	0.0386	-0.236	9.9896e-07	1.96e-05	TRUE	5.06024e-05	0.00069	TRUE	0.0279596	0.144	FALSE
Ppp1r14a	Q91VC7	-0.15	-0.251	0.00178	0.4	1.8943e-07	5.57e-06	TRUE	4.99306e-05	0.000683	TRUE	0.00259026	0.0428	FALSE
Ppp1r14b	Q62084	-0.0964	-0.157	-0.0653	0.319	1.57608e-08	8.12e-07	TRUE	2.32576e-07	1.2e-05	TRUE	0.0443851	0.19	FALSE
Ppp1r14c	Q8R4S0	0.213	0.0461	0.12	-0.378	0.000183734	0.00121	TRUE	3.82134e-05	0.000551	TRUE	0.399051	0.641	FALSE
Ppp3ca	P63328	0.11	0.0857	0.124	-0.319	4.11022e-06	6.01e-05	TRUE	1.46733e-06	4.59e-05	TRUE	0.508794	0.73	FALSE
Ppp3cb	P48453	0.0537	0.0697	0.1	-0.223	9.87173e-06	0.000116	TRUE	3.275e-06	8.72e-05	TRUE	0.498891	0.722	FALSE
Ppp3r1	Q63810	0.199	-0.0312	0.155	-0.323	0.000195661	0.00126	TRUE	1.02021e-06	3.46e-05	TRUE	0.00664268	0.0671	FALSE
Ppt1	O88531	-0.262	-0.237	0.0197	0.479	6.15433e-06	8.07e-05	TRUE	0.000507282	0.00402	TRUE	0.0254365	0.136	FALSE
Prdx1	P35700	-0.19	-0.145	-0.0115	0.347	1.06513e-08	6.05e-07	TRUE	5.59903e-07	2.2e-05	TRUE	0.00629024	0.0657	FALSE
Prdx6	O08709	-0.364	-0.233	-0.123	0.721	2.80182e-11	1.03e-08	TRUE	1.46886e-10	5.33e-08	TRUE	0.051845	0.208	FALSE
Prelid3a	Q8VE85	0.0846	0.127	0.0769	-0.289	0.000147544	0.00102	TRUE	0.000475789	0.00382	TRUE	0.54475	0.756	FALSE
Prkcq	Q02111	0.0971	-0.123	-0.329	0.355	0.00502912	0.0163	TRUE	0.000308642	0.00275	TRUE	0.176506	0.411	FALSE
Prkg2	Q61410	-0.0383	0.202	0.0534	-0.217	0.000382565	0.00211	TRUE	0.00972426	0.0397	TRUE	0.122956	0.335	FALSE
Prodh	Q9WU79	-0.125	-0.113	-0.0362	0.274	1.13918e-05	0.00013	TRUE	0.000109873	0.00125	TRUE	0.213051	0.459	FALSE
Pros1	Q08761	-0.353	-0.27	-0.305	0.928	4.6923e-07	1.14e-05	TRUE	3.32104e-07	1.54e-05	TRUE	0.804302	0.914	FALSE
Prps2	Q9CS42	-0.155	-0.113	-0.0487	0.317	2.43369e-05	0.000238	TRUE	0.000125063	0.00139	TRUE	0.371649	0.618	FALSE
Prrt1	O35449	0.185	0.107	0.12	-0.411	0.000482291	0.00252	TRUE	0.000388465	0.00328	TRUE	0.911755	0.967	FALSE
Prrt3	Q6PE13	0.0542	0.22	0.0542	-0.329	2.55965e-07	7.08e-06	TRUE	1.62703e-05	0.00029	TRUE	0.0149057	0.103	FALSE
Psme1	P97371	-0.098	-0.214	-0.013	0.325	2.44161e-10	3.7e-08	TRUE	1.04256e-07	6.53e-06	TRUE	4.05865e-05	0.00468	FALSE
Psme2	P97372	-0.155	-0.197	-0.0295	0.381	1.53944e-08	7.99e-07	TRUE	1.05393e-06	3.51e-05	TRUE	0.00503012	0.0578	FALSE
Ptbp1	P17225	-0.18	-0.244	-0.0643	0.488	1.57837e-06	2.82e-05	TRUE	3.53228e-05	0.000522	TRUE	0.0737133	0.253	FALSE
Pter	Q60866	-0.0581	-0.114	-0.0811	0.253	0.000914096	0.00421	TRUE	0.00191579	0.0114	TRUE	0.712915	0.862	FALSE
Ptgfrn	Q9WV91	-0.116	-0.0345	-0.0988	0.249	0.00126944	0.00546	TRUE	0.000220007	0.00211	TRUE	0.378165	0.625	FALSE
Ptgs1	P22437	-0.0433	-0.0527	-0.17	0.266	0.00133584	0.00569	TRUE	8.29407e-05	0.000999	TRUE	0.164684	0.395	FALSE
Ptpn6	P29351	-0.297	-0.283	-0.134	0.715	7.06642e-12	3.95e-09	TRUE	6.3709e-11	2.94e-08	TRUE	0.00875243	0.079	FALSE
Ptprf	A2A8L5	-0.0658	-0.0964	-0.105	0.267	2.48737e-08	1.14e-06	TRUE	1.87444e-08	1.82e-06	TRUE	0.808428	0.916	FALSE
Pxn	Q8VI36	-0.146	-0.165	-0.0233	0.335	2.85524e-08	1.27e-06	TRUE	1.69257e-06	5.1e-05	TRUE	0.00777261	0.0737	FALSE
Pycard	Q9EPB4	-0.261	-0.376	-0.116	0.753	1.94092e-09	1.66e-07	TRUE	5.68104e-08	4.16e-06	TRUE	0.0078449	0.074	FALSE
Q8BH50	Q8BH50	0.0862	0.173	0.194	-0.452	2.99122e-05	0.000279	TRUE	2.11085e-05	0.000357	TRUE	0.841641	0.933	FALSE
Q8BHR8	Q8BHR8	0.158	0.142	0.151	-0.452	0.000338244	0.00191	TRUE	0.000294789	0.00266	TRUE	0.94328	0.981	FALSE
Q91V76	Q91V76	-0.218	-0.154	-0.0583	0.43	8.43882e-08	3.12e-06	TRUE	7.45207e-07	2.76e-05	TRUE	0.123834	0.336	FALSE
Q9CYS6	Q9CYS6	-0.0722	-0.11	-0.157	0.339	3.08088e-07	8.23e-06	TRUE	8.89823e-08	5.72e-06	TRUE	0.355164	0.6	FALSE
Qki	Q9QYS9	-0.0565	-0.0677	-0.124	0.248	1.80666e-07	5.4e-06	TRUE	2.32692e-08	2.06e-06	TRUE	0.116536	0.325	FALSE
Rab15	Q8K386	0.16	0.13	0.0748	-0.365	1.70569e-07	5.14e-06	TRUE	7.09656e-07	2.64e-05	TRUE	0.311497	0.558	FALSE
Rab31	Q921E2	-0.0825	-0.199	-0.0288	0.31	2.78735e-07	7.61e-06	TRUE	2.85646e-05	0.000442	TRUE	0.00877384	0.0791	FALSE
Rab3a	P63011	0.0717	0.156	0.0901	-0.318	5.95039e-06	7.87e-05	TRUE	3.01117e-05	0.000458	TRUE	0.345195	0.592	FALSE
Rab3c	P62823	0.155	0.103	0.0152	-0.273	5.23428e-05	0.000435	TRUE	0.000619667	0.00469	TRUE	0.204592	0.449	FALSE
Rab3d	P35276	0.0401	0.172	0.0572	-0.269	4.94868e-06	6.86e-05	TRUE	0.000115926	0.0013	TRUE	0.0852962	0.274	FALSE
Rab3il1	Q8VDV3	0.0299	-0.259	-0.0757	0.305	0.000476519	0.00249	TRUE	0.00865772	0.0365	TRUE	0.164119	0.395	FALSE
Rab3ip	Q68EF0	0.0695	0.0681	0.0784	-0.216	0.000132187	0.000923	TRUE	9.36915e-05	0.0011	TRUE	0.853319	0.941	FALSE
Rabgap1l	A6H6A9	-0.0736	0.0835	0.174	-0.184	0.000102156	0.000747	TRUE	4.77026e-06	0.000116	TRUE	0.0925358	0.285	FALSE
Ralyl	Q8BTF8	-0.00534	0.205	0.0694	-0.269	1.53304e-05	0.000164	TRUE	0.000414764	0.00346	TRUE	0.0876875	0.278	FALSE
Ramac	Q9CQY2	0.0206	0.108	0.0684	-0.197	0.00399067	0.0135	TRUE	0.00963719	0.0394	TRUE	0.665305	0.838	FALSE
Rapgef2	Q8CHG7	0.117	0.0815	0.0384	-0.237	2.34953e-07	6.57e-06	TRUE	1.34243e-06	4.32e-05	TRUE	0.23238	0.48	FALSE
Rapgef3	Q8VCC8	-0.194	-0.157	-0.0535	0.404	0.00149435	0.0062	TRUE	0.00633602	0.0287	TRUE	0.48008	0.709	FALSE
Rapgefl1	Q68EF8	0.181	0.165	0.0111	-0.357	5.93233e-05	0.000483	TRUE	0.00135191	0.00862	TRUE	0.119265	0.329	FALSE
Rasgrp1	Q9Z1S3	0.163	0.0671	0.0905	-0.32	9.45312e-06	0.000112	TRUE	4.93244e-06	0.000117	TRUE	0.691381	0.852	FALSE
Rbfox2	Q8BP71	0.162	0.206	-0.0144	-0.353	1.04946e-06	2.04e-05	TRUE	0.000214615	0.00208	TRUE	0.00625769	0.0656	FALSE
Rbfox3	Q8BIF2	0.185	0.216	-0.0024	-0.398	1.01429e-05	0.000119	TRUE	0.00071965	0.00529	TRUE	0.0325637	0.157	FALSE
Rbmx	Q9WV02	0.0889	0.163	0.00598	-0.258	4.11252e-05	0.000357	TRUE	0.00252189	0.0141	TRUE	0.0466256	0.195	FALSE
Rbp1	Q00915	-0.211	-0.213	0.00742	0.417	8.36639e-07	1.73e-05	TRUE	9.1378e-05	0.00109	TRUE	0.0115001	0.0904	FALSE
Rbp4	Q00724	0.0383	-0.148	-0.295	0.405	0.00547218	0.0174	TRUE	0.000969282	0.00666	TRUE	0.397803	0.64	FALSE
Rcan1	Q9JHG6	0.0817	0.119	0.036	-0.237	1.94995e-06	3.36e-05	TRUE	3.63154e-05	0.000532	TRUE	0.0922886	0.285	FALSE
Rcn2	Q8BP92	-0.129	-0.139	-0.0602	0.328	1.83065e-07	5.45e-06	TRUE	1.66885e-06	5.09e-05	TRUE	0.135211	0.353	FALSE
Rdx	P26043	-0.203	-0.113	-0.0395	0.356	1.32304e-08	7.12e-07	TRUE	1.15144e-07	6.93e-06	TRUE	0.089699	0.281	FALSE
Reep2	Q8VCD6	0.122	0.0441	0.0802	-0.246	0.00040801	0.00221	TRUE	0.000139395	0.0015	TRUE	0.576797	0.778	FALSE
Rem2	Q8VEL9	0.0568	0.243	0.117	-0.416	0.000334571	0.00189	TRUE	0.00192779	0.0114	TRUE	0.383595	0.63	FALSE
Renbp	P82343	-0.384	-0.286	-0.0562	0.726	5.71074e-07	1.32e-05	TRUE	1.09123e-05	0.000216	TRUE	0.0721751	0.25	FALSE
Rftn2	Q8CHX7	-0.0918	-0.1	-0.0989	0.291	1.49467e-06	2.72e-05	TRUE	1.54856e-06	4.81e-05	TRUE	0.981241	0.993	FALSE
Rgs10	Q9CQE5	-0.181	-0.217	-0.055	0.453	7.76306e-10	8.8e-08	TRUE	2.86548e-08	2.45e-06	TRUE	0.00360718	0.0491	FALSE
Rhbdf1	Q6PIX5	-0.335	-0.0307	-0.024	0.39	0.00942193	0.027	TRUE	0.0103604	0.0417	TRUE	0.962578	0.988	FALSE
Rhog	P84096	-0.171	-0.187	-0.0284	0.386	5.8709e-07	1.34e-05	TRUE	2.2659e-05	0.000376	TRUE	0.0331805	0.159	FALSE
Rida	P52760	-0.441	-0.205	0.0636	0.582	9.07996e-08	3.25e-06	TRUE	1.21494e-05	0.000236	TRUE	0.00428518	0.0529	FALSE
Rimbp2	Q80U40	0.0711	0.137	0.042	-0.25	8.45089e-07	1.74e-05	TRUE	2.01985e-05	0.000344	TRUE	0.0610541	0.23	FALSE
Rims1	Q99NE5	0.0794	0.124	0.0784	-0.282	2.5054e-08	1.14e-06	TRUE	1.12344e-07	6.86e-06	TRUE	0.235575	0.483	FALSE
Rnaset2a	C0HKG5	-0.0385	-0.0752	-0.14	0.254	0.00770562	0.023	TRUE	0.0022686	0.0129	TRUE	0.549724	0.759	FALSE
Rnd3	P61588	-0.172	-0.16	-0.0937	0.425	0.00633409	0.0196	TRUE	0.0129795	0.0498	TRUE	0.723721	0.868	FALSE
Rnps1	Q99M28	0.073	0.0638	0.132	-0.269	0.00553201	0.0176	TRUE	0.00145045	0.00913	TRUE	0.512115	0.732	FALSE
Robo1	O89026	0.112	0.0906	0.0431	-0.246	8.07641e-07	1.69e-05	TRUE	4.70998e-06	0.000115	TRUE	0.259056	0.508	FALSE
Robo2	Q7TPD3	0.075	0.0901	0.0588	-0.224	1.28098e-06	2.39e-05	TRUE	4.28024e-06	0.000108	TRUE	0.439142	0.672	FALSE
Rp2	Q9EPK2	-0.131	-0.0303	-0.0948	0.256	0.00563167	0.0178	TRUE	0.00130479	0.00835	TRUE	0.474316	0.705	FALSE
Rph3a	P47708	0.133	0.153	0.0124	-0.298	3.327e-09	2.66e-07	TRUE	3.7357e-07	1.7e-05	TRUE	0.00125364	0.03	FALSE
Rpl13a	P19253	-0.0571	0.438	0.144	-0.524	1.88652e-05	0.000193	TRUE	0.000626066	0.00472	TRUE	0.0745998	0.255	FALSE
Rpl18	P35980	-0.113	0.173	0.117	-0.177	0.00103359	0.00463	TRUE	0.00377159	0.0193	TRUE	0.524319	0.74	FALSE
Rragb	Q6NTA4	-0.0536	0.165	0.13	-0.241	0.000959337	0.00438	TRUE	0.00194398	0.0115	TRUE	0.725552	0.869	FALSE
Rras	P10833	-0.0762	-0.103	-0.0573	0.236	1.7922e-05	0.000185	TRUE	7.87515e-05	0.00096	TRUE	0.410192	0.649	FALSE
Rrbp1	Q99PL5	-0.175	-0.108	-0.0338	0.317	4.36237e-05	0.000376	TRUE	0.000279965	0.00255	TRUE	0.325631	0.574	FALSE
Rtf1	A2AQ19	0.0283	0.237	0.0538	-0.319	0.000388082	0.00213	TRUE	0.00779162	0.0335	TRUE	0.150124	0.376	FALSE
Rtn4rl2	Q7M6Z0	0.221	0.0726	0.0391	-0.332	9.66078e-05	0.000715	TRUE	0.000219368	0.00211	TRUE	0.663732	0.837	FALSE
S100a1	P56565	-0.191	-0.224	-0.0761	0.491	5.47452e-11	1.37e-08	TRUE	1.21174e-09	2.56e-07	TRUE	0.00274837	0.0437	FALSE
S100a11	P50543	-0.237	-0.416	-0.0123	0.666	9.00077e-07	1.82e-05	TRUE	0.000138367	0.00149	TRUE	0.0081058	0.0753	FALSE
S100a13	P97352	-0.378	0.00396	-0.0436	0.418	0.000129852	0.000909	TRUE	4.42281e-05	0.000614	TRUE	0.55885	0.766	FALSE
S100b	P50114	-0.248	-0.243	-0.115	0.606	2.99489e-05	0.000279	TRUE	0.000151119	0.0016	TRUE	0.380817	0.627	FALSE
Samhd1	Q60710	-0.0773	-0.165	-0.104	0.346	1.34252e-09	1.33e-07	TRUE	7.18306e-09	8.7e-07	TRUE	0.118895	0.329	FALSE
Sat2	Q6P8J2	-0.0735	-0.0924	-0.107	0.273	0.00889643	0.0259	TRUE	0.00694579	0.0307	TRUE	0.902934	0.963	FALSE
Scap	Q6GQT6	0.301	0.157	0.0978	-0.555	0.000968855	0.0044	TRUE	0.00190753	0.0113	TRUE	0.736257	0.874	FALSE
Scarb2	O35114	-0.283	-0.0799	-0.0724	0.435	3.54605e-07	9.1e-06	TRUE	4.23899e-07	1.86e-05	TRUE	0.897995	0.961	FALSE
Scn2b	Q56A07	0.0866	0.0663	0.14	-0.293	2.58053e-05	0.000248	TRUE	3.35233e-06	8.86e-05	TRUE	0.230739	0.479	FALSE
Scrn2	Q8VCA8	-0.101	-0.136	-0.0536	0.291	1.12797e-07	3.91e-06	TRUE	1.51801e-06	4.73e-05	TRUE	0.0785342	0.262	FALSE
Sdf2l1	Q9ESP1	0.00612	-0.127	-0.0748	0.196	0.00196669	0.00768	TRUE	0.00666223	0.0297	TRUE	0.550388	0.76	FALSE
Sec13	Q9D1M0	-0.185	0.144	0.193	-0.152	0.000275481	0.00163	TRUE	6.46419e-05	0.00082	TRUE	0.443762	0.676	FALSE
Sec61a2	Q9JLR1	0.341	0.0497	0.111	-0.501	0.000549728	0.00278	TRUE	0.000215124	0.00208	TRUE	0.629621	0.814	FALSE
Selenbp1	P17563	-0.158	-0.166	0.0157	0.309	3.23947e-08	1.38e-06	TRUE	1.02518e-05	0.000206	TRUE	0.000975303	0.0281	FALSE
Sema6d	Q76KF0	0.0314	-0.173	-0.0678	0.209	0.00114606	0.00502	TRUE	0.0105611	0.0423	TRUE	0.282863	0.532	FALSE
Septin10	Q8C650	-0.188	-0.0863	-0.0248	0.299	8.26199e-06	0.000102	TRUE	5.18786e-05	0.000698	TRUE	0.29675	0.545	FALSE
Septin2	P42208	-0.154	-0.128	-0.0991	0.381	3.85745e-10	5.29e-08	TRUE	8.4859e-10	2.13e-07	TRUE	0.397752	0.64	FALSE
Septin4	P28661	-0.0976	-0.0879	-0.0701	0.256	2.94347e-06	4.6e-05	TRUE	5.37506e-06	0.000126	TRUE	0.705254	0.858	FALSE
Serpina1a	P07758	0.0332	-0.109	-0.229	0.304	0.00515411	0.0166	TRUE	0.000765216	0.00556	TRUE	0.351737	0.598	FALSE
Serpina3n	Q91WP6	-0.0767	-0.305	-0.302	0.684	5.47394e-06	7.38e-05	TRUE	5.66468e-06	0.000132	TRUE	0.983098	0.993	FALSE
Serpine2	Q07235	-0.213	-0.0504	-0.00805	0.272	2.89346e-06	4.53e-05	TRUE	1.38728e-05	0.000259	TRUE	0.343212	0.592	FALSE
Serpinh1	P19324	-0.1	-0.165	-0.119	0.384	0.000441836	0.00235	TRUE	0.000922177	0.00643	TRUE	0.709885	0.86	FALSE
Sez6l	Q6P1D5	0.134	0.103	0.0242	-0.261	6.62502e-07	1.47e-05	TRUE	1.07927e-05	0.000214	TRUE	0.0882829	0.279	FALSE
Sfxn5	Q925N0	-0.134	-0.062	-0.061	0.257	2.33e-05	0.00023	TRUE	2.40798e-05	0.000391	TRUE	0.984893	0.994	FALSE
Sgpl1	Q8R0X7	-0.183	-0.246	-0.106	0.536	4.65707e-11	1.21e-08	TRUE	6.63039e-10	1.78e-07	TRUE	0.00657369	0.0668	FALSE
Sh3gl1	Q62419	0.098	0.0655	0.0675	-0.231	5.85915e-05	0.000477	TRUE	5.47548e-05	0.000729	TRUE	0.970138	0.99	FALSE
Sh3rf3	Q8C120	0.106	0.151	0.0653	-0.322	0.00281203	0.0102	TRUE	0.0103386	0.0416	TRUE	0.524486	0.74	FALSE
Shank1	D3YZU1	0.125	0.0937	0.0354	-0.254	1.28364e-07	4.26e-06	TRUE	1.18291e-06	3.87e-05	TRUE	0.126194	0.339	FALSE
Shisa7	Q8C3Q5	0.119	0.102	0.0826	-0.304	5.93315e-07	1.34e-05	TRUE	1.0733e-06	3.56e-05	TRUE	0.683959	0.849	FALSE
Slc12a2	P55012	-0.202	-0.159	0.0182	0.342	0.000222077	0.00139	TRUE	0.00665738	0.0297	TRUE	0.104008	0.304	FALSE
Slc12a9	Q99MR3	-0.122	-0.0918	-0.0746	0.288	3.05164e-07	8.18e-06	TRUE	5.33112e-07	2.15e-05	TRUE	0.690093	0.852	FALSE
Slc16a1	P53986	-0.0281	-0.138	-0.182	0.348	0.000322053	0.00184	TRUE	0.000145378	0.00155	TRUE	0.677638	0.845	FALSE
Slc17a7	Q3TXX4	0.156	0.107	0.0387	-0.301	8.90713e-08	3.22e-06	TRUE	8.20045e-07	2.95e-05	TRUE	0.118874	0.329	FALSE
Slc1a3	P56564	0.0304	-0.125	-0.0943	0.189	0.000181943	0.0012	TRUE	0.000465125	0.00378	TRUE	0.627621	0.813	FALSE
Slc1a4	O35874	-0.0809	-0.142	-0.122	0.345	5.33265e-09	3.84e-07	TRUE	9.34638e-09	1.06e-06	TRUE	0.606812	0.799	FALSE
Slc22a4	Q9Z306	-0.0776	-0.208	-0.167	0.452	0.00106668	0.00474	TRUE	0.00177858	0.0107	TRUE	0.799241	0.911	FALSE
Slc25a21	Q8BZ09	-0.0358	-0.289	-0.0609	0.386	6.15458e-05	0.000498	TRUE	0.00226614	0.0129	TRUE	0.0782409	0.261	FALSE
Slc25a22	Q9D6M3	0.192	0.291	-0.0634	-0.42	2.52202e-05	0.000244	TRUE	0.00821061	0.0349	TRUE	0.00850651	0.0778	FALSE
Slc30a3	P97441	0.198	0.142	0.0515	-0.391	2.99605e-06	4.65e-05	TRUE	2.32749e-05	0.000382	TRUE	0.226323	0.475	FALSE
Slc35d1	A2AKQ0	-0.00644	-0.188	-0.219	0.413	0.000300102	0.00174	TRUE	0.000189266	0.00189	TRUE	0.809889	0.916	FALSE
Slc38a3	Q9DCP2	-0.134	-0.16	-0.12	0.414	0.000184395	0.00121	TRUE	0.000358202	0.00307	TRUE	0.729885	0.871	FALSE
Slc39a3	Q99K24	0.117	0.152	0.00981	-0.279	0.000203042	0.0013	TRUE	0.00495961	0.0238	TRUE	0.12347	0.336	FALSE
Slc44a1	Q6X893	-0.197	-0.18	0.0315	0.346	0.00023998	0.00147	TRUE	0.0113066	0.0448	TRUE	0.0697157	0.245	FALSE
Slc4a4	O88343	-0.00505	-0.0988	-0.0998	0.204	8.79809e-06	0.000107	TRUE	8.47975e-06	0.000178	TRUE	0.982225	0.993	FALSE
Slc5a3	Q9JKZ2	-0.229	-0.297	-0.0499	0.576	8.58911e-09	5.29e-07	TRUE	5.50941e-07	2.18e-05	TRUE	0.00433498	0.0533	FALSE
Slc6a15	Q8BG16	-0.0167	0.158	0.0702	-0.212	1.30142e-05	0.000144	TRUE	0.000200245	0.00197	TRUE	0.143654	0.365	FALSE
Slc7a11	Q9WTR6	-0.0351	-0.197	-0.147	0.379	2.03878e-06	3.46e-05	TRUE	5.80406e-06	0.000134	TRUE	0.50996	0.73	FALSE
Slc7a14	Q8BXR1	0.131	0.0876	0.101	-0.32	1.81741e-06	3.18e-05	TRUE	1.23194e-06	4e-05	TRUE	0.796356	0.91	FALSE
Slc8a2	Q8K596	0.134	0.0286	0.0915	-0.254	0.00134736	0.00572	TRUE	0.000243721	0.00228	TRUE	0.390663	0.634	FALSE
Slco1a5	Q91YY5	0.0679	-0.329	-0.0765	0.338	0.000376807	0.00208	TRUE	0.0120475	0.047	TRUE	0.100661	0.3	FALSE
Slco2b1	Q8BXB6	-0.0504	-0.228	-0.0551	0.333	0.000193303	0.00125	TRUE	0.00382453	0.0195	TRUE	0.14704	0.37	FALSE
Slitrk2	Q810C0	0.217	0.161	0.0109	-0.389	0.000421653	0.00228	TRUE	0.00492115	0.0237	TRUE	0.232221	0.48	FALSE
Snap23	O09044	-0.303	-0.207	0.0173	0.492	1.13762e-09	1.18e-07	TRUE	1.62655e-07	9.09e-06	TRUE	0.00050144	0.0188	FALSE
Snap91	Q61548	0.0595	0.124	0.0471	-0.231	1.59502e-06	2.84e-05	TRUE	2.42736e-05	0.000393	TRUE	0.10967	0.313	FALSE
Snca	O55042	0.149	0.258	0.0621	-0.469	0.00105793	0.00471	TRUE	0.0095334	0.0392	TRUE	0.287343	0.536	FALSE
Sntb1	Q99L88	-0.0987	-0.0508	-0.0657	0.215	0.000642724	0.00315	TRUE	0.000401616	0.00337	TRUE	0.810669	0.916	FALSE
Soat1	Q61263	-0.103	-0.206	-0.191	0.5	1.52253e-09	1.44e-07	TRUE	2.01587e-09	3.49e-07	TRUE	0.777312	0.898	FALSE
Sorbs3	Q9R1Z8	-0.202	-0.174	-0.0904	0.467	3.48686e-07	9.03e-06	TRUE	1.83262e-06	5.43e-05	TRUE	0.26376	0.512	FALSE
Sparc	P07214	-0.0521	-0.106	-0.087	0.245	3.62436e-06	5.43e-05	TRUE	6.74761e-06	0.00015	TRUE	0.699624	0.856	FALSE
Spg11	Q3UHA3	-0.196	-0.0724	-0.0782	0.347	0.0105362	0.0296	TRUE	0.0097183	0.0397	TRUE	0.968136	0.99	FALSE
Spon1	Q8VCC9	0.116	0.0908	0.0607	-0.267	0.00183759	0.00729	TRUE	0.00348168	0.0181	TRUE	0.752825	0.885	FALSE
Sprn	Q8BWU1	0.38	0.172	-0.00445	-0.548	7.35982e-07	1.59e-05	TRUE	1.77043e-05	0.00031	TRUE	0.0589595	0.225	FALSE
Spry3	Q3UUD2	0.127	0.0622	0.223	-0.412	0.00165883	0.00672	TRUE	0.000134172	0.00146	TRUE	0.210634	0.456	FALSE
Sqor	Q9R112	-0.18	-0.215	-0.00755	0.402	8.3977e-05	0.000637	TRUE	0.00278262	0.0152	TRUE	0.0886405	0.279	FALSE
Srd5a3	Q9WUP4	0.0284	-0.0919	-0.126	0.19	7.457e-05	0.000579	TRUE	2.29794e-05	0.000379	TRUE	0.51254	0.732	FALSE
Srp19	Q9D7A6	0.0115	0.152	0.0783	-0.242	0.00269826	0.0099	TRUE	0.0104722	0.042	TRUE	0.507617	0.729	FALSE
Srxn1	Q9D975	0.11	-0.309	-0.146	0.345	0.000631048	0.00311	TRUE	0.00541871	0.0256	TRUE	0.295114	0.543	FALSE
Ssh3	Q8K330	0.0159	-0.205	-0.0869	0.276	0.000332189	0.00188	TRUE	0.00317919	0.0168	TRUE	0.267491	0.515	FALSE
Stard5	Q9EPQ7	-0.0113	-0.151	-0.066	0.228	4.88969e-06	6.86e-05	TRUE	7.18067e-05	0.000898	TRUE	0.133115	0.351	FALSE
Stat2	Q9WVL2	-0.143	-0.172	-0.0348	0.35	0.000235104	0.00145	TRUE	0.00286532	0.0156	TRUE	0.219435	0.469	FALSE
Stat3	P42227	-0.201	-0.209	-0.0514	0.462	4.30611e-11	1.2e-08	TRUE	1.56384e-09	2.97e-07	TRUE	0.000874518	0.0265	FALSE
Sting1	Q3TBT3	-0.171	-0.193	-0.0504	0.414	4.56456e-05	0.000386	TRUE	0.000561146	0.00435	TRUE	0.196299	0.437	FALSE
Stk38	Q91VJ4	-0.0657	-0.0292	-0.298	0.393	0.00137649	0.00582	TRUE	1.34541e-05	0.000253	TRUE	0.0239276	0.133	FALSE
Stom	P54116	-0.181	-0.246	-0.0251	0.452	4.81736e-07	1.15e-05	TRUE	3.45077e-05	0.000511	TRUE	0.0156573	0.107	FALSE
Stum	Q0VBF8	0.149	0.186	0.218	-0.553	0.000357352	0.00199	TRUE	0.000242422	0.00227	TRUE	0.840602	0.933	FALSE
Stx1a	O35526	0.0922	0.088	0.135	-0.315	3.22805e-06	4.92e-05	TRUE	9.02075e-07	3.18e-05	TRUE	0.406122	0.647	FALSE
Stxbp2	Q64324	-0.0762	-0.219	-0.0334	0.328	4.10985e-06	6.01e-05	TRUE	0.000285162	0.00259	TRUE	0.0278047	0.144	FALSE
Stxbp3	Q60770	-0.14	-0.11	-0.0723	0.322	9.83171e-07	1.95e-05	TRUE	2.84087e-06	7.76e-05	TRUE	0.487206	0.714	FALSE
Suclg2	Q9Z2I8	-0.203	-0.21	0.00553	0.407	1.19503e-08	6.58e-07	TRUE	2.33284e-06	6.73e-05	TRUE	0.00110314	0.0288	FALSE
Sugct	Q7TNE1	-0.0724	-0.122	-0.151	0.346	0.000212506	0.00135	TRUE	0.00012021	0.00134	TRUE	0.763048	0.891	FALSE
Suox	Q8R086	-0.0915	-0.0924	-0.0969	0.281	1.14699e-05	0.00013	TRUE	1.00752e-05	0.000203	TRUE	0.93822	0.98	FALSE
Syde1	Q9DBZ9	-0.0261	-0.136	-0.449	0.611	2.43797e-05	0.000238	TRUE	4.58259e-07	1.97e-05	TRUE	0.0216505	0.126	FALSE
Syn1	O88935	0.078	0.0811	0.0639	-0.223	4.9186e-06	6.86e-05	TRUE	9.37935e-06	0.000192	TRUE	0.69355	0.853	FALSE
Syn2	Q64332	0.111	0.0759	0.0724	-0.259	1.82941e-08	8.89e-07	TRUE	2.08902e-08	1.92e-06	TRUE	0.908814	0.966	FALSE
Syn3	Q8JZP2	0.182	0.164	-0.0342	-0.312	9.61017e-09	5.77e-07	TRUE	6.64126e-06	0.000149	TRUE	0.000207349	0.0127	FALSE
Synpo	Q8CC35	0.151	0.0751	0.028	-0.254	4.52341e-07	1.11e-05	TRUE	2.79335e-06	7.66e-05	TRUE	0.230758	0.479	FALSE
Synpo2	Q91YE8	-0.036	-0.285	-0.0544	0.375	5.04094e-05	0.000422	TRUE	0.00221688	0.0127	TRUE	0.0651183	0.238	FALSE
Synpr	Q8BGN8	0.253	0.268	0.05	-0.57	1.81455e-05	0.000186	TRUE	0.000347006	0.00299	TRUE	0.122873	0.335	FALSE
Syt1	P46096	0.102	0.13	0.0238	-0.256	5.34043e-09	3.84e-07	TRUE	3.08488e-07	1.47e-05	TRUE	0.00412925	0.0517	FALSE
Syt12	Q920N7	0.129	0.128	0.106	-0.364	4.82471e-07	1.15e-05	TRUE	8.35723e-07	2.98e-05	TRUE	0.702143	0.856	FALSE
Tap2	P36371	-0.184	-0.281	-0.0139	0.479	4.97384e-07	1.17e-05	TRUE	6.075e-05	0.000781	TRUE	0.00867077	0.0786	FALSE
Tgfa	P48030	-0.0341	-0.119	-0.199	0.352	0.00531096	0.017	TRUE	0.00176651	0.0107	TRUE	0.589288	0.787	FALSE
Tgtp2	Q3T9E4	-0.543	-0.502	0.116	0.929	2.67502e-05	0.000256	TRUE	0.00376149	0.0193	TRUE	0.0197199	0.121	FALSE
Th	P24529	-0.0894	-0.105	-0.131	0.326	0.000108956	0.000789	TRUE	6.05322e-05	0.000781	TRUE	0.74942	0.883	FALSE
Thbs4	Q9Z1T2	-0.21	-0.0298	-0.165	0.404	0.000191474	0.00125	TRUE	1.23584e-05	0.000238	TRUE	0.141933	0.363	FALSE
Thy1	P01831	0.0651	0.117	0.0543	-0.236	5.07038e-06	6.98e-05	TRUE	4.09618e-05	0.000584	TRUE	0.230089	0.479	FALSE
Tjp2	Q9Z0U1	-0.214	-0.105	-0.0207	0.34	4.84016e-09	3.55e-07	TRUE	7.15049e-08	4.85e-06	TRUE	0.032089	0.156	FALSE
Tln1	P26039	-0.171	-0.18	-0.00933	0.361	6.07294e-09	4.2e-07	TRUE	6.96681e-07	2.64e-05	TRUE	0.00162927	0.0343	FALSE
Tmem132e	Q6IEE6	0.133	0.0491	0.11	-0.293	0.000382499	0.00211	TRUE	8.21367e-05	0.000991	TRUE	0.421812	0.658	FALSE
Tmem30a	Q8VEK0	0.0682	0.0871	0.0894	-0.245	0.00455796	0.015	TRUE	0.00434863	0.0216	TRUE	0.981553	0.993	FALSE
Tmem59l	Q7TNI2	0.329	0.201	0.111	-0.641	0.00115657	0.00506	TRUE	0.0027098	0.0149	TRUE	0.673769	0.843	FALSE
Tmem63a	Q91YT8	-0.241	-0.391	0.0145	0.618	4.83523e-05	0.000408	TRUE	0.00394251	0.02	TRUE	0.0363349	0.167	FALSE
Tmem63c	Q8CBX0	0.073	0.0669	0.141	-0.281	0.00462654	0.0152	TRUE	0.00111281	0.00736	TRUE	0.48473	0.713	FALSE
Tmlhe	Q91ZE0	0.107	-0.166	-0.236	0.295	0.000225288	0.00141	TRUE	5.86161e-05	0.000762	TRUE	0.473778	0.704	FALSE
Tnfaip8	Q921Z5	0.0133	-0.102	-0.11	0.198	0.00452913	0.015	TRUE	0.00380794	0.0194	TRUE	0.932021	0.977	FALSE
Tnfaip8l2	Q9D8Y7	-0.0921	-0.143	-0.263	0.498	0.00145705	0.00608	TRUE	0.000346399	0.00299	TRUE	0.471677	0.703	FALSE
Tns3	Q5SSZ5	-0.185	-0.127	-0.0286	0.341	2.87117e-07	7.81e-06	TRUE	4.64143e-06	0.000114	TRUE	0.0761704	0.257	FALSE
Tomm7	Q9D173	0.463	0.0157	0.0169	-0.496	0.00117097	0.0051	TRUE	0.0011499	0.00754	TRUE	0.992763	0.997	FALSE
Tor1aip1	Q921T2	0.236	-0.162	-0.257	0.183	0.00250289	0.00929	TRUE	0.000345768	0.00299	TRUE	0.32795	0.576	FALSE
Tph2	Q8CGV2	-0.125	-0.0847	-0.064	0.274	9.0611e-05	0.000679	TRUE	0.000160282	0.00167	TRUE	0.7603	0.889	FALSE
Tpp1	O89023	-0.314	-0.165	0.091	0.387	3.15552e-06	4.86e-05	TRUE	0.0013612	0.00865	TRUE	0.00401775	0.0509	FALSE
Tppp	Q7TQD2	0.00499	0.184	0.0777	-0.267	9.82465e-06	0.000116	TRUE	0.000154473	0.00163	TRUE	0.136355	0.355	FALSE
Tpt1	P63028	0.00759	0.108	0.0906	-0.207	0.000309107	0.00178	TRUE	0.000513408	0.00406	TRUE	0.794611	0.909	FALSE
Trem2	Q99NH8	-0.325	-0.367	-0.155	0.847	2.48114e-06	4.02e-05	TRUE	2.06465e-05	0.00035	TRUE	0.208475	0.454	FALSE
Trhde	Q8K093	0.204	0.161	-0.00485	-0.36	4.04139e-07	1.02e-05	TRUE	3.07742e-05	0.000466	TRUE	0.0138709	0.1	FALSE
Trim25	Q61510	-0.147	-0.144	-0.103	0.394	1.43518e-05	0.000156	TRUE	3.26554e-05	0.000492	TRUE	0.636187	0.818	FALSE
Trim47	Q8C0E3	-0.089	-0.312	-0.141	0.542	4.99813e-05	0.000419	TRUE	0.000412307	0.00344	TRUE	0.271407	0.518	FALSE
Tsc22d4	Q9EQN3	-0.131	-0.139	-0.0557	0.325	0.00039699	0.00216	TRUE	0.00198201	0.0116	TRUE	0.423889	0.659	FALSE
Tsen15	Q8R3W5	0.138	0.164	0.045	-0.347	1.42906e-06	2.63e-05	TRUE	2.70306e-05	0.000423	TRUE	0.0862311	0.275	FALSE
Tspan15	F7BWT7	-0.104	-0.257	-0.159	0.52	8.82525e-06	0.000107	TRUE	3.68143e-05	0.000536	TRUE	0.410775	0.649	FALSE
Tspan18	Q80WR1	0.159	0.402	0.119	-0.68	0.000257429	0.00156	TRUE	0.00304439	0.0163	TRUE	0.225539	0.474	FALSE
Tspan2	Q922J6	-0.0222	-0.106	-0.074	0.202	0.00170783	0.00687	TRUE	0.00377192	0.0193	TRUE	0.696449	0.855	FALSE
Tspan4	Q9DCK3	-0.461	-0.332	-0.147	0.941	0.000229529	0.00142	TRUE	0.000899369	0.00629	TRUE	0.48824	0.714	FALSE
Tst	P52196	-0.132	-0.0407	-0.0998	0.273	0.000454885	0.00241	TRUE	9.19108e-05	0.00109	TRUE	0.406453	0.647	FALSE
Ttll7	A4Q9F0	0.0617	0.0953	0.124	-0.281	0.0028946	0.0105	TRUE	0.00168993	0.0103	TRUE	0.790452	0.906	FALSE
Ttyh2	Q3TH73	-0.202	-0.0649	-0.0703	0.337	0.000241213	0.00148	TRUE	0.000213497	0.00208	TRUE	0.949076	0.983	FALSE
Uap1l1	Q3TW96	-0.192	-0.149	-0.114	0.455	1.97325e-07	5.76e-06	TRUE	4.03376e-07	1.81e-05	TRUE	0.602399	0.796	FALSE
Ugdh	O70475	-0.154	-0.187	-0.103	0.443	0.000191657	0.00125	TRUE	0.000679205	0.00505	TRUE	0.517422	0.735	FALSE
Ugp2	Q91ZJ5	-0.095	-0.103	-0.131	0.329	1.09656e-08	6.13e-07	TRUE	4.95663e-09	6.55e-07	TRUE	0.469788	0.701	FALSE
Ugt1a6	Q64435	-0.451	-0.46	-0.0391	0.95	4.66704e-07	1.14e-05	TRUE	2.58571e-05	0.000409	TRUE	0.0207761	0.123	FALSE
Ugt8	Q64676	-0.000287	-0.0852	-0.17	0.255	0.000258741	0.00156	TRUE	2.95429e-05	0.000453	TRUE	0.249719	0.498	FALSE
Ulk1	O70405	-0.00349	0.158	0.132	-0.287	0.000459482	0.00243	TRUE	0.000758524	0.00552	TRUE	0.799277	0.911	FALSE
Unc5a	Q8K1S4	0.0815	0.0622	0.0733	-0.217	0.000528173	0.0027	TRUE	0.000376135	0.0032	TRUE	0.862104	0.945	FALSE
Unc5b	Q8K1S3	-0.112	-0.0674	-0.11	0.289	0.000792142	0.00373	TRUE	0.000298415	0.00268	TRUE	0.619587	0.809	FALSE
Unc93b1	Q8VCW4	-0.0963	-0.358	-0.261	0.716	0.00471628	0.0155	TRUE	0.00862191	0.0364	TRUE	0.766861	0.892	FALSE
Upp1	P52624	-0.0216	-0.308	-0.224	0.553	1.1394e-05	0.00013	TRUE	3.38041e-05	0.000502	TRUE	0.530779	0.746	FALSE
Usp46	P62069	-0.0736	0.198	0.0764	-0.201	0.000318871	0.00183	TRUE	0.00538654	0.0255	TRUE	0.171667	0.405	FALSE
Vamp2	P63044	0.151	0.279	-0.0023	-0.427	1.62192e-05	0.000172	TRUE	0.00175714	0.0106	TRUE	0.0233974	0.132	FALSE
Vav1	P27870	0.0816	-0.0543	-0.292	0.264	0.0105725	0.0297	TRUE	0.000146152	0.00155	TRUE	0.0453951	0.193	FALSE
Vcam1	P29533	-0.192	-0.139	-0.0784	0.409	9.13402e-10	9.76e-08	TRUE	4.22924e-09	5.97e-07	TRUE	0.140158	0.359	FALSE
Vcan	Q62059	-0.164	-0.115	0.00553	0.273	1.36707e-07	4.45e-06	TRUE	1.06339e-05	0.000212	TRUE	0.00958431	0.0834	FALSE
Vtn	P29788	-0.25	-0.353	-0.0258	0.628	3.43682e-07	8.95e-06	TRUE	3.37092e-05	0.000502	TRUE	0.00987646	0.0834	FALSE
Vwa5a	Q99KC8	-0.235	-0.225	-0.0155	0.475	1.40439e-10	2.73e-08	TRUE	1.51778e-08	1.53e-06	TRUE	0.000232428	0.0134	FALSE
Wipf3	P0C7L0	0.16	0.042	0.0515	-0.254	0.000326593	0.00186	TRUE	0.000245101	0.00229	TRUE	0.88154	0.956	FALSE
Xkr4	Q5GH67	0.118	0.213	0.0194	-0.35	1.44008e-05	0.000156	TRUE	0.000808428	0.0058	TRUE	0.0434904	0.188	FALSE
Yap1	P46938	-0.0999	-0.144	-0.0976	0.341	0.000596463	0.00297	TRUE	0.00134653	0.0086	TRUE	0.683248	0.849	FALSE
Ybx1	P62960	0.0902	-0.187	-0.124	0.221	0.000402367	0.00219	TRUE	0.00158836	0.00976	TRUE	0.492418	0.717	FALSE
Yod1	Q8CB27	0.00207	0.155	0.092	-0.249	0.000235075	0.00145	TRUE	0.00102289	0.00692	TRUE	0.457032	0.691	FALSE
Ywhah	P68510	0.0653	0.0794	0.0608	-0.205	7.10265e-05	0.000555	TRUE	0.000137069	0.00148	TRUE	0.72313	0.868	FALSE
Zap70	P43404	0.115	0.139	0.0757	-0.329	0.00266571	0.00979	TRUE	0.00709691	0.0311	TRUE	0.631298	0.815	FALSE
Zbtb18	Q9WUK6	0.275	0.0377	-0.0183	-0.295	0.000306863	0.00177	TRUE	0.00144296	0.00911	TRUE	0.43785	0.671	FALSE
Znf365	Q8BG89	0.225	0.174	-0.00273	-0.396	4.36745e-07	1.09e-05	TRUE	2.89486e-05	0.000446	TRUE	0.0166248	0.111	FALSE
